# Supplementary material for: Global human myeloid replacement with peripheral progenitors induces interferonopathy and neurodegeneration
Source: Research Square preprint supplement (doi:10.21203/rs.3.rs-7762822/v1), 2025-10-03
Supplement: Supplementary file 1 [file 32964378677ee596c7742903.xlsx]

## Sheet: 2.1 General Information
Supplementary Table 2
Table 2.1 General Information	Supplementary Table 2: Species comparison of human myeloid signatures. Related to Figure 4 and Extended Data Figure 4. Tabs include the genes and the gene ontology unique to murine peripheral myeloid cells, unique to human peripheral myeloid cells, and those that are shared by both species. There are also tabs for the murine and human specific Ingenuity Pathway Analysis (IPA) results. Lastly tabs…
Table 2.2	Fig4_MouseUniqueEnrichmentGenes
Table 2.3	Fig4_MouseUniqueEnrichment
Table 2.4	Fig4_SharedEnrichmentGenes
Table 2.5	Fig4_SharedEnrichment
Table 2.6	Fig4_HumanUniqueGenes
Table 2.7	Fig4_HumanUniqueEnrichment
Table 2.8	Fig4i_HumanSpecific IPA URA
Table 2.9	Extend Data Fig4d_UpMouse IPA URA
Table 2.10	Extend Data Fig4b_Pairwise Human vs Mouse CD34MNC
Table 2.11	Extend Data Fig4e_UpHumanCD34MNC_Enrichment
Table 2.12	Extend Data Fig4c_UpMouseCD34MNC_Enrichment

## Sheet: Fig4_MouseUniqueEnrichmentGenes
Table 2.2	Fig4_MouseUniqueEnrichmentGenes
MyList	Gene ID	Type	Tax ID	Homologene Gene ID	Homologene Gene Tax ID	Gene Symbol	Description	Biological Process (GO)	Kinase Class (UniProt)	R-MMU-72689 Formation of a pool of free 40	R-MMU-6798695 Neutrophil degranulation	R-MMU-382551 Transport of small molecules	GO:0050900 leukocyte migration	GO:0006954 inflammatory response	GO:0001816 cytokine production	GO:0098657 import into cell	GO:0002685 regulation of leukocyte migrat	GO:0001819 positive regulation of cytokin	R-MMU-9711123 Cellular response to chemical	GO:0032103 positive regulation of respons	GO:0043068 positive regulation of program	mmu04142 Lysosome - Mus musculus (house	GO:0010876 lipid localization	GO:0045862 positive regulation of proteol	GO:0002521 leukocyte differentiation	GO:0141124 intracellular signaling casset	GO:0051129 negative regulation of cellula	GO:0005975 carbohydrate metabolic process	GO:1900744 regulation of p38MAPK cascade
AATK	11302	symbol	M. musculus	11302	M. musculus	Aatk	apoptosis-associated tyrosine kinase	GO:0038083 peptidyl-tyrosine autophosphorylation;GO:0018108 peptidyl-tyrosine phosphorylation;GO:0018212 peptidyl-tyrosine modification	yes	0.0	0.0	0.0	0.0	0.0	0.0	0.0	0.0	0.0	0.0	0.0	0.0	0.0	0.0	0.0	0.0	0.0	0.0	0.0	0.0
ABCA2	11305	symbol	M. musculus	11305	M. musculus	Abca2	ATP-binding cassette, sub-family A member 2	GO:0032378 negative regulation of intracellular lipid transport;GO:0032381 negative regulation of intracellular sterol transport;GO:0032384 negative regulation of intracellular cholesterol transport		0.0	0.0	0.0	0.0	0.0	0.0	0.0	0.0	0.0	0.0	0.0	0.0	1.0	1.0	0.0	0.0	0.0	1.0	0.0	0.0
ABCC9	20928	symbol	M. musculus	20928	M. musculus	Abcc9	ATP-binding cassette, sub-family C member 9	GO:1903760 regulation of voltage-gated potassium channel activity involved in ventricular cardiac muscle cell action potential repolarization;GO:0072592 oxygen metabolic process;GO:1904880 response to hydrogen sulfide		0.0	0.0	1.0	0.0	0.0	1.0	1.0	0.0	0.0	0.0	0.0	0.0	0.0	0.0	0.0	0.0	1.0	0.0	1.0	0.0
ABCD2	26874	symbol	M. musculus	26874	M. musculus	Abcd2	ATP-binding cassette, sub-family D member 2	GO:0015910 long-chain fatty acid import into peroxisome;GO:0042760 very long-chain fatty acid catabolic process;GO:1902001 fatty acid transmembrane transport		0.0	0.0	1.0	0.0	0.0	0.0	0.0	0.0	0.0	0.0	0.0	0.0	0.0	1.0	0.0	0.0	0.0	0.0	0.0	0.0
ABCG1	11307	symbol	M. musculus	11307	M. musculus	Abcg1	ATP binding cassette subfamily G member 1	GO:0071403 cellular response to high density lipoprotein particle stimulus;GO:1904409 regulation of secretory granule organization;GO:1904411 positive regulation of secretory granule organization		0.0	0.0	1.0	0.0	0.0	0.0	0.0	0.0	0.0	0.0	0.0	0.0	0.0	1.0	0.0	0.0	0.0	0.0	0.0	0.0
ABHD14B	76491	symbol	M. musculus	76491	M. musculus	Abhd14b	abhydrolase domain containing 14b	GO:0045944 positive regulation of transcription by RNA polymerase II;GO:0045893 positive regulation of DNA-templated transcription;GO:1902680 positive regulation of RNA biosynthetic process		0.0	0.0	0.0	0.0	0.0	0.0	0.0	0.0	0.0	0.0	0.0	0.0	0.0	0.0	0.0	0.0	0.0	0.0	0.0	0.0
ACAA2	52538	symbol	M. musculus	52538	M. musculus	Acaa2	acetyl-CoA acyltransferase 2	GO:1902109 negative regulation of mitochondrial membrane permeability involved in apoptotic process;GO:1901029 negative regulation of mitochondrial outer membrane permeabilization involved in apoptotic signaling pathway;GO:0035795 negative regulation of mitochondrial membrane permeability		0.0	0.0	0.0	0.0	0.0	0.0	0.0	0.0	0.0	0.0	0.0	0.0	0.0	0.0	0.0	0.0	0.0	1.0	1.0	0.0
ACAP3	140500	symbol	M. musculus	140500	M. musculus	Acap3	ArfGAP with coiled-coil, ankyrin repeat and PH domains 3	GO:0001764 neuron migration;GO:0010975 regulation of neuron projection development;GO:0120035 regulation of plasma membrane bounded cell projection organization		0.0	0.0	0.0	0.0	0.0	0.0	0.0	0.0	0.0	0.0	0.0	0.0	0.0	0.0	0.0	0.0	0.0	0.0	0.0	0.0
ADAM33	110751	symbol	M. musculus	110751	M. musculus	Adam33	a disintegrin and metallopeptidase domain 33	GO:0001817 regulation of cytokine production;GO:0006508 proteolysis;GO:0042127 regulation of cell population proliferation		0.0	0.0	0.0	0.0	0.0	0.0	0.0	0.0	0.0	0.0	0.0	0.0	0.0	0.0	0.0	0.0	0.0	0.0	0.0	0.0
ADAM9	11502	symbol	M. musculus	11502	M. musculus	Adam9	ADAM metallopeptidase domain 9	GO:0034241 positive regulation of macrophage fusion;GO:0033631 cell-cell adhesion mediated by integrin;GO:0034239 regulation of macrophage fusion		0.0	0.0	0.0	0.0	0.0	0.0	0.0	1.0	0.0	0.0	0.0	0.0	0.0	0.0	1.0	1.0	0.0	0.0	0.0	0.0
ADAMTS10	224697	symbol	M. musculus	224697	M. musculus	Adamts10	ADAM metallopeptidase with thrombospondin type 1 motif 10	GO:0030198 extracellular matrix organization;GO:0045229 external encapsulating structure organization;GO:0043062 extracellular structure organization		0.0	0.0	0.0	0.0	0.0	0.0	0.0	0.0	0.0	0.0	0.0	0.0	0.0	0.0	0.0	0.0	0.0	0.0	0.0	0.0
ADAMTSL4	229595	symbol	M. musculus	229595	M. musculus	Adamtsl4	ADAMTS-like 4	GO:0070285 pigment cell development;GO:0050931 pigment cell differentiation;GO:0048066 developmental pigmentation		0.0	0.0	0.0	0.0	0.0	0.0	0.0	0.0	0.0	0.0	0.0	1.0	0.0	0.0	0.0	0.0	0.0	0.0	0.0	0.0
ADAP1	231821	symbol	M. musculus	231821	M. musculus	Adap1	ArfGAP with dual PH domains 1	GO:0043087 regulation of GTPase activity;GO:0051336 regulation of hydrolase activity;GO:0050790 regulation of catalytic activity		0.0	0.0	0.0	0.0	0.0	0.0	0.0	0.0	0.0	0.0	0.0	0.0	0.0	0.0	0.0	0.0	0.0	0.0	0.0	0.0
ADAR	56417	symbol	M. musculus	56417	M. musculus	Adar	adenosine deaminase, RNA-specific	GO:0006382 adenosine to inosine editing;GO:1903944 negative regulation of hepatocyte apoptotic process;GO:0044387 negative regulation of protein kinase activity by regulation of protein phosphorylation		1.0	0.0	0.0	0.0	0.0	0.0	0.0	0.0	0.0	0.0	1.0	0.0	0.0	0.0	0.0	0.0	0.0	0.0	0.0	0.0
ADCY7	11513	symbol	M. musculus	11513	M. musculus	Adcy7	adenylate cyclase 7	GO:0006171 cAMP biosynthetic process;GO:0046058 cAMP metabolic process;GO:0071285 cellular response to lithium ion		0.0	0.0	0.0	0.0	0.0	0.0	0.0	0.0	0.0	0.0	0.0	0.0	0.0	0.0	0.0	0.0	0.0	0.0	1.0	0.0
ADGRE5	26364	symbol	M. musculus	26364	M. musculus	Adgre5	adhesion G protein-coupled receptor E5	GO:0051965 positive regulation of synapse assembly;GO:1901890 positive regulation of cell junction assembly;GO:0007189 adenylate cyclase-activating G protein-coupled receptor signaling pathway		0.0	1.0	0.0	0.0	0.0	0.0	0.0	0.0	0.0	0.0	0.0	0.0	0.0	0.0	0.0	0.0	0.0	0.0	0.0	0.0
ADI1	104923	symbol	M. musculus	104923	M. musculus	Adi1	acireductone dioxygenase 1	GO:0019509 L-methionine salvage from methylthioadenosine;GO:0043102 amino acid salvage;GO:0071265 L-methionine biosynthetic process		0.0	0.0	0.0	0.0	0.0	0.0	0.0	0.0	0.0	0.0	0.0	0.0	0.0	0.0	0.0	0.0	0.0	0.0	0.0	0.0
AFDN	17356	symbol	M. musculus	17356	M. musculus	Afdn	afadin, adherens junction formation factor	GO:0061884 regulation of mini excitatory postsynaptic potential;GO:0061885 positive regulation of mini excitatory postsynaptic potential;GO:2000049 positive regulation of cell-cell adhesion mediated by cadherin		0.0	0.0	0.0	0.0	0.0	0.0	0.0	0.0	0.0	0.0	0.0	0.0	0.0	0.0	0.0	0.0	0.0	0.0	0.0	0.0
AGPAT2	67512	symbol	M. musculus	67512	M. musculus	Agpat2	1-acylglycerol-3-phosphate O-acyltransferase 2	GO:0006654 phosphatidic acid biosynthetic process;GO:0019432 triglyceride biosynthetic process;GO:0046473 phosphatidic acid metabolic process		0.0	1.0	0.0	0.0	0.0	0.0	0.0	0.0	1.0	0.0	0.0	0.0	0.0	0.0	0.0	0.0	0.0	0.0	0.0	0.0
AGTPBP1	67269	symbol	M. musculus	67269	M. musculus	Agtpbp1	ATP/GTP binding protein 1	GO:0098958 retrograde axonal transport of mitochondrion;GO:0035609 C-terminal protein deglutamylation;GO:0098957 anterograde axonal transport of mitochondrion		0.0	0.0	0.0	0.0	0.0	0.0	0.0	0.0	0.0	0.0	0.0	0.0	0.0	0.0	1.0	0.0	0.0	0.0	0.0	0.0
AGTRAP	11610	symbol	M. musculus	11610	M. musculus	Agtrap	angiotensin II, type I receptor-associated protein	GO:0038166 angiotensin-activated signaling pathway;GO:1904385 cellular response to angiotensin;GO:1990776 response to angiotensin		0.0	0.0	0.0	0.0	0.0	0.0	0.0	0.0	0.0	0.0	0.0	0.0	0.0	0.0	0.0	0.0	0.0	0.0	0.0	0.0
AHNAK	66395	symbol	M. musculus	66395	M. musculus	Ahnak	AHNAK nucleoprotein	GO:1905686 positive regulation of plasma membrane repair;GO:1905684 regulation of plasma membrane repair;GO:1903729 regulation of plasma membrane organization		0.0	0.0	0.0	0.0	0.0	0.0	0.0	0.0	0.0	0.0	0.0	0.0	0.0	0.0	0.0	0.0	0.0	0.0	0.0	0.0
AHSA1	217737	symbol	M. musculus	217737	M. musculus	Ahsa1	AHA1, activator of heat shock protein ATPase 1	GO:0032781 positive regulation of ATP-dependent activity;GO:0043462 regulation of ATP-dependent activity;GO:0006457 protein folding		0.0	0.0	0.0	0.0	0.0	0.0	0.0	0.0	0.0	0.0	0.0	0.0	0.0	0.0	0.0	0.0	0.0	0.0	0.0	0.0
AIFM2	71361	symbol	M. musculus	71361	M. musculus	Aifm2	apoptosis-inducing factor, mitochondrion-associated 2	GO:0110076 negative regulation of ferroptosis;GO:0110075 regulation of ferroptosis;GO:0042373 vitamin K metabolic process		0.0	0.0	0.0	0.0	0.0	0.0	0.0	0.0	0.0	0.0	0.0	1.0	0.0	0.0	0.0	0.0	0.0	0.0	0.0	0.0
AIMP2	231872	symbol	M. musculus	231872	M. musculus	Aimp2	aminoacyl tRNA synthetase complex-interacting multifunctional protein 2	GO:0060510 type II pneumocyte differentiation;GO:0061140 lung secretory cell differentiation;GO:0060479 lung cell differentiation		1.0	0.0	0.0	0.0	0.0	0.0	0.0	0.0	0.0	0.0	0.0	1.0	0.0	0.0	0.0	0.0	0.0	0.0	0.0	0.0
AK2	11637	symbol	M. musculus	11637	M. musculus	Ak2	adenylate kinase 2	GO:0006172 ADP biosynthetic process;GO:0009136 purine nucleoside diphosphate biosynthetic process;GO:0009180 purine ribonucleoside diphosphate biosynthetic process	yes	0.0	0.0	0.0	0.0	0.0	0.0	0.0	0.0	0.0	0.0	0.0	0.0	0.0	0.0	0.0	0.0	0.0	0.0	1.0	0.0
AKR1A1	58810	symbol	M. musculus	58810	M. musculus	Akr1a1	aldo-keto reductase family 1, member A1	GO:0042839 D-glucuronate metabolic process;GO:0042840 D-glucuronate catabolic process;GO:0006064 glucuronate catabolic process		0.0	0.0	0.0	0.0	0.0	0.0	0.0	0.0	0.0	0.0	0.0	0.0	0.0	0.0	0.0	0.0	0.0	0.0	1.0	0.0
ALCAM	11658	symbol	M. musculus	11658	M. musculus	Alcam	activated leukocyte cell adhesion molecule	GO:0008045 motor neuron axon guidance;GO:0007157 heterophilic cell-cell adhesion via plasma membrane cell adhesion molecules;GO:0098742 cell-cell adhesion via plasma-membrane adhesion molecules		0.0	0.0	0.0	0.0	0.0	0.0	0.0	0.0	0.0	0.0	0.0	0.0	0.0	0.0	0.0	1.0	0.0	0.0	0.0	0.0
ALDH16A1	69748	symbol	M. musculus	69748	M. musculus	Aldh16a1	aldehyde dehydrogenase 16 family, member A1			0.0	0.0	0.0	0.0	0.0	0.0	0.0	0.0	0.0	0.0	0.0	0.0	0.0	0.0	0.0	0.0	0.0	0.0	0.0	0.0
ALDH2	11669	symbol	M. musculus	11669	M. musculus	Aldh2	aldehyde dehydrogenase 2, mitochondrial	GO:0006117 acetaldehyde metabolic process;GO:1905627 regulation of serotonin biosynthetic process;GO:1903179 regulation of dopamine biosynthetic process		0.0	0.0	0.0	0.0	0.0	0.0	0.0	0.0	0.0	0.0	0.0	1.0	0.0	0.0	0.0	0.0	0.0	0.0	0.0	0.0
ALKBH6	233065	symbol	M. musculus	233065	M. musculus	Alkbh6	alkB homolog 6	GO:0008150 biological_process		0.0	0.0	0.0	0.0	0.0	0.0	0.0	0.0	0.0	0.0	0.0	0.0	0.0	0.0	0.0	0.0	0.0	0.0	0.0	0.0
ALMS1	236266	symbol	M. musculus	236266	M. musculus	Alms1	ALMS1, centrosome and basal body associated	GO:0046548 retinal rod cell development;GO:0040015 negative regulation of multicellular organism growth;GO:0030728 ovulation		0.0	0.0	0.0	0.0	0.0	0.0	0.0	0.0	0.0	0.0	0.0	0.0	0.0	0.0	0.0	0.0	1.0	0.0	0.0	0.0
ALOX5	11689	symbol	M. musculus	11689	M. musculus	Alox5	arachidonate 5-lipoxygenase	GO:1901751 leukotriene A4 metabolic process;GO:1901753 leukotriene A4 biosynthetic process;GO:0002540 leukotriene production involved in inflammatory response		0.0	1.0	0.0	1.0	1.0	0.0	0.0	0.0	0.0	0.0	0.0	0.0	0.0	0.0	0.0	0.0	0.0	0.0	0.0	0.0
ALPK1	71481	symbol	M. musculus	71481	M. musculus	Alpk1	alpha-kinase 1	GO:0002753 cytoplasmic pattern recognition receptor signaling pathway;GO:0002221 pattern recognition receptor signaling pathway;GO:0002758 innate immune response-activating signaling pathway		0.0	0.0	0.0	0.0	0.0	0.0	0.0	0.0	0.0	0.0	1.0	0.0	0.0	0.0	0.0	0.0	0.0	0.0	0.0	0.0
AMDHD2	245847	symbol	M. musculus	245847	M. musculus	Amdhd2	amidohydrolase domain containing 2	GO:0006046 N-acetylglucosamine catabolic process;GO:0019262 N-acetylneuraminate catabolic process;GO:0006054 N-acetylneuraminate metabolic process		0.0	0.0	0.0	0.0	0.0	0.0	0.0	0.0	0.0	0.0	0.0	0.0	0.0	0.0	0.0	0.0	0.0	0.0	1.0	0.0
AMZ1	231842	symbol	M. musculus	231842	M. musculus	Amz1	archaelysin family metallopeptidase 1	GO:0006508 proteolysis;GO:0019538 protein metabolic process;GO:1901564 organonitrogen compound metabolic process		0.0	0.0	0.0	0.0	0.0	0.0	0.0	0.0	0.0	0.0	0.0	0.0	0.0	0.0	0.0	0.0	0.0	0.0	0.0	0.0
ANAPC5	59008	symbol	M. musculus	59008	M. musculus	Anapc5	anaphase-promoting complex subunit 5	GO:0045842 positive regulation of mitotic metaphase/anaphase transition;GO:1902101 positive regulation of metaphase/anaphase transition of cell cycle;GO:1901970 positive regulation of mitotic sister chromatid separation		0.0	0.0	0.0	0.0	0.0	0.0	0.0	0.0	0.0	1.0	0.0	0.0	0.0	0.0	0.0	0.0	0.0	0.0	0.0	0.0
ANXA5	11747	symbol	M. musculus	11747	M. musculus	Anxa5	annexin A5	GO:1902721 negative regulation of prolactin secretion;GO:0097211 cellular response to gonadotropin-releasing hormone;GO:0097210 response to gonadotropin-releasing hormone		0.0	0.0	0.0	0.0	0.0	0.0	0.0	0.0	0.0	0.0	0.0	1.0	0.0	0.0	0.0	0.0	0.0	0.0	0.0	0.0
ANXA6	11749	symbol	M. musculus	11749	M. musculus	Anxa6	annexin A6	GO:0051560 mitochondrial calcium ion homeostasis;GO:0051283 negative regulation of sequestering of calcium ion;GO:0051282 regulation of sequestering of calcium ion		0.0	0.0	0.0	0.0	0.0	0.0	0.0	0.0	0.0	0.0	0.0	1.0	0.0	0.0	0.0	0.0	0.0	0.0	0.0	0.0
ANXA7	11750	symbol	M. musculus	11750	M. musculus	Anxa7	annexin A7	GO:0009992 intracellular water homeostasis;GO:0007207 phospholipase C-activating G protein-coupled acetylcholine receptor signaling pathway;GO:0099105 ion channel modulating, G protein-coupled receptor signaling pathway		0.0	0.0	0.0	0.0	0.0	0.0	0.0	0.0	0.0	0.0	0.0	0.0	0.0	0.0	0.0	0.0	0.0	0.0	0.0	0.0
AOAH	27052	symbol	M. musculus	27052	M. musculus	Aoah	acyloxyacyl hydrolase	GO:0008653 lipopolysaccharide metabolic process;GO:0009104 lipopolysaccharide catabolic process;GO:1903509 liposaccharide metabolic process		0.0	0.0	0.0	0.0	0.0	0.0	0.0	0.0	0.0	0.0	0.0	0.0	0.0	0.0	0.0	0.0	0.0	0.0	1.0	0.0
AP1B1	11764	symbol	M. musculus	11764	M. musculus	Ap1b1	adaptor protein complex AP-1, beta 1 subunit	GO:0110010 basolateral protein secretion;GO:0048268 clathrin coat assembly;GO:1903232 melanosome assembly		0.0	0.0	0.0	0.0	0.0	0.0	0.0	0.0	0.0	0.0	0.0	0.0	1.0	0.0	0.0	0.0	0.0	0.0	0.0	0.0
AP1G2	11766	symbol	M. musculus	11766	M. musculus	Ap1g2	adaptor protein complex AP-1, gamma 2 subunit	GO:0006896 Golgi to vacuole transport;GO:0006892 post-Golgi vesicle-mediated transport;GO:0007034 vacuolar transport		0.0	0.0	0.0	0.0	0.0	0.0	0.0	0.0	0.0	0.0	0.0	0.0	1.0	0.0	0.0	0.0	0.0	0.0	0.0	0.0
AP2A2	11772	symbol	M. musculus	11772	M. musculus	Ap2a2	adaptor-related protein complex 2, alpha 2 subunit	GO:0098884 postsynaptic neurotransmitter receptor internalization;GO:0140239 postsynaptic endocytosis;GO:1902036 regulation of hematopoietic stem cell differentiation		0.0	1.0	1.0	0.0	0.0	0.0	1.0	0.0	0.0	0.0	0.0	0.0	0.0	0.0	0.0	0.0	0.0	0.0	0.0	0.0
AP5S1	69596	symbol	M. musculus	69596	M. musculus	Ap5s1	adaptor-related protein 5 complex, sigma 1 subunit	GO:0000724 double-strand break repair via homologous recombination;GO:0000725 recombinational repair;GO:0006302 double-strand break repair		0.0	0.0	0.0	0.0	0.0	0.0	0.0	0.0	0.0	0.0	0.0	0.0	0.0	0.0	0.0	0.0	0.0	0.0	0.0	0.0
AP5Z1	231855	symbol	M. musculus	231855	M. musculus	Ap5z1	adaptor-related protein complex 5, zeta 1 subunit	GO:0034499 late endosome to Golgi transport;GO:1905146 lysosomal protein catabolic process;GO:0007039 protein catabolic process in the vacuole		0.0	0.0	0.0	0.0	0.0	0.0	0.0	0.0	0.0	0.0	0.0	0.0	0.0	0.0	0.0	0.0	0.0	0.0	0.0	0.0
APAF1	11783	symbol	M. musculus	11783	M. musculus	Apaf1	apoptotic peptidase activating factor 1	GO:0008635 activation of cysteine-type endopeptidase activity involved in apoptotic process by cytochrome c;GO:1902510 regulation of apoptotic DNA fragmentation;GO:1903624 regulation of DNA catabolic process		0.0	1.0	0.0	0.0	0.0	0.0	0.0	0.0	1.0	0.0	0.0	1.0	0.0	0.0	1.0	0.0	0.0	0.0	0.0	0.0
APH1B	208117	symbol	M. musculus	208117	M. musculus	Aph1b	aph1 homolog B, gamma secretase subunit	GO:0007220 Notch receptor processing;GO:0034205 amyloid-beta formation;GO:0001963 synaptic transmission, dopaminergic		0.0	0.0	0.0	0.0	0.0	0.0	0.0	0.0	0.0	0.0	0.0	0.0	0.0	0.0	1.0	0.0	0.0	0.0	0.0	0.0
APLNR	23796	symbol	M. musculus	23796	M. musculus	Aplnr	apelin receptor	GO:1904323 regulation of inhibitory G protein-coupled receptor phosphorylation;GO:1904325 positive regulation of inhibitory G protein-coupled receptor phosphorylation;GO:1903589 positive regulation of blood vessel endothelial cell proliferation involved in sprouting angiogenesis		0.0	0.0	0.0	0.0	0.0	0.0	0.0	0.0	0.0	0.0	0.0	0.0	0.0	0.0	0.0	0.0	0.0	0.0	0.0	0.0
APOBEC1	11810	symbol	M. musculus	11810	M. musculus	Apobec1	apolipoprotein B mRNA editing enzyme, catalytic polypeptide 1	GO:0090366 positive regulation of mRNA modification;GO:0070383 DNA cytosine deamination;GO:0090365 regulation of mRNA modification		1.0	0.0	0.0	0.0	0.0	0.0	0.0	0.0	0.0	0.0	0.0	0.0	0.0	0.0	0.0	0.0	0.0	0.0	0.0	0.0
APOC1	11812	symbol	M. musculus	11812	M. musculus	Apoc1	apolipoprotein C-I	GO:0010900 negative regulation of phosphatidylcholine catabolic process;GO:0150174 negative regulation of phosphatidylcholine metabolic process;GO:0010899 regulation of phosphatidylcholine catabolic process		0.0	0.0	1.0	0.0	0.0	0.0	0.0	0.0	0.0	0.0	0.0	0.0	0.0	1.0	0.0	0.0	0.0	1.0	0.0	0.0
APOC2	11813	symbol	M. musculus	11813	M. musculus	Apoc2	apolipoprotein C2	GO:0060697 positive regulation of phospholipid catabolic process;GO:0010915 regulation of very-low-density lipoprotein particle clearance;GO:0010916 negative regulation of very-low-density lipoprotein particle clearance		0.0	0.0	1.0	0.0	0.0	0.0	0.0	0.0	0.0	0.0	0.0	0.0	0.0	1.0	0.0	0.0	0.0	1.0	0.0	0.0
APOC4	11425	symbol	M. musculus	11425	M. musculus	Apoc4	apolipoprotein C-IV	GO:0010890 positive regulation of sequestering of triglyceride;GO:0010889 regulation of sequestering of triglyceride;GO:0010884 positive regulation of lipid storage		0.0	0.0	1.0	0.0	0.0	0.0	0.0	0.0	0.0	0.0	0.0	0.0	0.0	1.0	0.0	0.0	0.0	0.0	0.0	0.0
APOLD1	381823	symbol	M. musculus	381823	M. musculus	Apold1	apolipoprotein L domain containing 1	GO:0045601 regulation of endothelial cell differentiation;GO:0030856 regulation of epithelial cell differentiation;GO:0001525 angiogenesis		0.0	0.0	0.0	0.0	0.0	0.0	0.0	0.0	0.0	0.0	0.0	0.0	0.0	0.0	0.0	0.0	0.0	0.0	0.0	0.0
APP	11820	symbol	M. musculus	11820	M. musculus	App	amyloid beta precursor protein	GO:0045752 positive regulation of Toll signaling pathway;GO:1905945 regulation of response to calcium ion;GO:0051563 smooth endoplasmic reticulum calcium ion homeostasis		0.0	0.0	0.0	0.0	1.0	0.0	1.0	1.0	1.0	0.0	1.0	1.0	0.0	0.0	1.0	1.0	1.0	1.0	0.0	0.0
APRT	11821	symbol	M. musculus	11821	M. musculus	Aprt	adenine phosphoribosyl transferase	GO:0006168 adenine salvage;GO:0046084 adenine biosynthetic process;GO:0043096 purine nucleobase salvage		0.0	1.0	0.0	0.0	0.0	0.0	0.0	0.0	0.0	0.0	0.0	0.0	0.0	0.0	0.0	0.0	0.0	0.0	1.0	0.0
ARAP1	69710	symbol	M. musculus	69710	M. musculus	Arap1	ArfGAP with RhoGAP domain, ankyrin repeat and PH domain 1	GO:0001921 positive regulation of receptor recycling;GO:0001919 regulation of receptor recycling;GO:0051497 negative regulation of stress fiber assembly		0.0	0.0	0.0	0.0	0.0	0.0	0.0	0.0	0.0	0.0	0.0	0.0	0.0	0.0	0.0	0.0	0.0	1.0	0.0	0.0
ARHGAP15	76117	symbol	M. musculus	76117	M. musculus	Arhgap15	Rho GTPase activating protein 15	GO:0008360 regulation of cell shape;GO:0022604 regulation of cell morphogenesis;GO:0043087 regulation of GTPase activity		0.0	0.0	0.0	0.0	0.0	0.0	0.0	0.0	0.0	0.0	0.0	0.0	0.0	0.0	0.0	0.0	0.0	0.0	0.0	0.0
ARHGAP19	71085	symbol	M. musculus	71085	M. musculus	Arhgap19	Rho GTPase activating protein 19	GO:0051056 regulation of small GTPase mediated signal transduction;GO:1902531 regulation of intracellular signal transduction;GO:0009966 regulation of signal transduction		0.0	0.0	0.0	0.0	0.0	0.0	0.0	0.0	0.0	0.0	0.0	0.0	0.0	0.0	0.0	0.0	0.0	0.0	0.0	0.0
ARHGAP22	239027	symbol	M. musculus	239027	M. musculus	Arhgap22	Rho GTPase activating protein 22	GO:0090630 activation of GTPase activity;GO:0099175 regulation of postsynapse organization;GO:0043547 positive regulation of GTPase activity		0.0	0.0	0.0	0.0	0.0	0.0	0.0	0.0	0.0	0.0	0.0	0.0	0.0	0.0	0.0	0.0	0.0	0.0	0.0	0.0
ARHGAP6	11856	symbol	M. musculus	11856	M. musculus	Arhgap6	Rho GTPase activating protein 6	GO:0051895 negative regulation of focal adhesion assembly;GO:0150118 negative regulation of cell-substrate junction organization;GO:0010518 positive regulation of phospholipase activity		0.0	0.0	0.0	0.0	0.0	0.0	0.0	0.0	0.0	0.0	0.0	0.0	0.0	0.0	0.0	0.0	0.0	1.0	0.0	0.0
ARHGDIA	192662	symbol	M. musculus	192662	M. musculus	Arhgdia	Rho GDP dissociation inhibitor alpha	GO:0098693 regulation of synaptic vesicle cycle;GO:0071526 semaphorin-plexin signaling pathway;GO:0071260 cellular response to mechanical stimulus		0.0	0.0	0.0	0.0	0.0	0.0	0.0	0.0	0.0	0.0	0.0	0.0	0.0	0.0	0.0	0.0	1.0	0.0	0.0	0.0
ARHGEF3	71704	symbol	M. musculus	71704	M. musculus	Arhgef3	Rho guanine nucleotide exchange factor 3	GO:0035025 positive regulation of Rho protein signal transduction;GO:0035023 regulation of Rho protein signal transduction;GO:0051057 positive regulation of small GTPase mediated signal transduction		0.0	0.0	0.0	0.0	0.0	0.0	0.0	0.0	0.0	0.0	0.0	0.0	0.0	0.0	0.0	0.0	0.0	0.0	0.0	0.0
ARID5A	214855	symbol	M. musculus	214855	M. musculus	Arid5a	AT-rich interaction domain 5A	GO:2000554 regulation of T-helper 1 cell cytokine production;GO:2000556 positive regulation of T-helper 1 cell cytokine production;GO:1901985 positive regulation of protein acetylation		0.0	0.0	0.0	0.0	0.0	0.0	0.0	0.0	1.0	0.0	1.0	0.0	0.0	0.0	0.0	0.0	0.0	0.0	0.0	0.0
ARL10	56795	symbol	M. musculus	56795	M. musculus	Arl10	ADP-ribosylation factor-like 10	GO:0008150 biological_process		0.0	0.0	0.0	0.0	0.0	0.0	0.0	0.0	0.0	0.0	0.0	0.0	0.0	0.0	0.0	0.0	0.0	0.0	0.0	0.0
ARL11	219144	symbol	M. musculus	219144	M. musculus	Arl11	ADP-ribosylation factor-like 11	GO:0002244 hematopoietic progenitor cell differentiation;GO:0006886 intracellular protein transport;GO:0030097 hemopoiesis		0.0	0.0	0.0	0.0	0.0	0.0	0.0	0.0	0.0	0.0	0.0	0.0	0.0	0.0	0.0	0.0	0.0	0.0	0.0	0.0
ARL2BP	107566	symbol	M. musculus	107566	M. musculus	Arl2bp	ADP-ribosylation factor-like 2 binding protein	GO:0051457 maintenance of protein location in nucleus;GO:0072595 maintenance of protein localization in organelle;GO:0042531 positive regulation of tyrosine phosphorylation of STAT protein		0.0	0.0	1.0	0.0	0.0	0.0	0.0	0.0	0.0	0.0	0.0	0.0	0.0	0.0	0.0	0.0	0.0	0.0	0.0	0.0
ARL5C	217151	symbol	M. musculus	217151	M. musculus	Arl5c	ADP-ribosylation factor-like 5C	GO:1903292 protein localization to Golgi membrane;GO:0034067 protein localization to Golgi apparatus;GO:0072657 protein localization to membrane		0.0	0.0	0.0	0.0	0.0	0.0	0.0	0.0	0.0	0.0	0.0	0.0	0.0	0.0	0.0	0.0	0.0	0.0	0.0	0.0
ARL8A	68724	symbol	M. musculus	68724	M. musculus	Arl8a	ADP-ribosylation factor-like 8A	GO:0008089 anterograde axonal transport;GO:0098930 axonal transport;GO:0008088 axo-dendritic transport		0.0	1.0	0.0	0.0	0.0	0.0	0.0	0.0	0.0	0.0	0.0	0.0	0.0	0.0	0.0	0.0	0.0	0.0	0.0	0.0
ARRDC1	215705	symbol	M. musculus	215705	M. musculus	Arrdc1	arrestin domain containing 1	GO:0140112 extracellular vesicle biogenesis;GO:0045746 negative regulation of Notch signaling pathway;GO:0006858 extracellular transport		0.0	0.0	0.0	0.0	0.0	0.0	0.0	0.0	0.0	0.0	0.0	0.0	0.0	0.0	0.0	0.0	0.0	0.0	0.0	0.0
ASB10	117590	symbol	M. musculus	117590	M. musculus	Asb10	ankyrin repeat and SOCS box-containing 10	GO:0035556 intracellular signal transduction;GO:0007165 signal transduction;GO:0023052 signaling		0.0	0.0	0.0	0.0	0.0	0.0	0.0	0.0	0.0	0.0	0.0	0.0	0.0	0.0	0.0	0.0	0.0	0.0	0.0	0.0
ASCL4	67341	symbol	M. musculus	67341	M. musculus	Ascl4	achaete-scute family bHLH transcription factor 4	GO:0006357 regulation of transcription by RNA polymerase II;GO:0006355 regulation of DNA-templated transcription;GO:2001141 regulation of RNA biosynthetic process		0.0	0.0	0.0	0.0	0.0	0.0	0.0	0.0	0.0	0.0	0.0	0.0	0.0	0.0	0.0	0.0	0.0	0.0	0.0	0.0
ASGR2	11890	symbol	M. musculus	11890	M. musculus	Asgr2	asialoglycoprotein receptor 2	GO:0055088 lipid homeostasis;GO:0009100 glycoprotein metabolic process;GO:0031647 regulation of protein stability		0.0	0.0	0.0	0.0	0.0	0.0	1.0	0.0	0.0	0.0	0.0	0.0	0.0	0.0	0.0	0.0	0.0	0.0	0.0	0.0
ATG12	67526	symbol	M. musculus	67526	M. musculus	Atg12	autophagy related 12	GO:1904971 regulation of viral translation;GO:1904973 positive regulation of viral translation;GO:0061739 protein lipidation involved in autophagosome assembly		0.0	0.0	0.0	0.0	0.0	0.0	0.0	0.0	0.0	0.0	1.0	0.0	0.0	0.0	0.0	0.0	0.0	0.0	1.0	0.0
ATG2A	329015	symbol	M. musculus	329015	M. musculus	Atg2a	autophagy related 2A	GO:0061723 glycophagy;GO:0030242 autophagy of peroxisome;GO:0034727 piecemeal microautophagy of the nucleus		0.0	0.0	0.0	0.0	0.0	0.0	0.0	0.0	0.0	0.0	0.0	0.0	0.0	1.0	0.0	0.0	0.0	0.0	1.0	0.0
ATG7	74244	symbol	M. musculus	74244	M. musculus	Atg7	autophagy related 7	GO:0090298 negative regulation of mitochondrial DNA replication;GO:1901859 negative regulation of mitochondrial DNA metabolic process;GO:0039689 negative stranded viral RNA replication		0.0	1.0	0.0	0.0	0.0	0.0	0.0	0.0	0.0	0.0	1.0	1.0	0.0	0.0	1.0	0.0	0.0	1.0	0.0	0.0
ATP10D	231287	symbol	M. musculus	231287	M. musculus	Atp10d	ATPase, class V, type 10D	GO:0045332 phospholipid translocation;GO:0034204 lipid translocation;GO:0097035 regulation of membrane lipid distribution		0.0	0.0	1.0	0.0	0.0	0.0	0.0	0.0	0.0	0.0	0.0	0.0	0.0	1.0	0.0	0.0	0.0	0.0	0.0	0.0
ATP13A1	170759	symbol	M. musculus	170759	M. musculus	Atp13a1	ATPase type 13A1	GO:0140569 extraction of mislocalized protein from ER membrane;GO:0140568 extraction of mislocalized protein from membrane;GO:0006874 intracellular calcium ion homeostasis		0.0	0.0	1.0	0.0	0.0	0.0	0.0	0.0	0.0	0.0	0.0	0.0	0.0	0.0	0.0	0.0	0.0	0.0	0.0	0.0
ATP13A2	74772	symbol	M. musculus	74772	M. musculus	Atp13a2	ATPase type 13A2	GO:1903710 spermine transmembrane transport;GO:0018217 peptidyl-aspartic acid phosphorylation;GO:1990938 peptidyl-aspartic acid autophosphorylation		0.0	0.0	1.0	0.0	0.0	0.0	0.0	0.0	0.0	0.0	0.0	0.0	0.0	0.0	1.0	0.0	0.0	0.0	0.0	0.0
ATP1A1	11928	symbol	M. musculus	11928	M. musculus	Atp1a1	ATPase, Na+/K+ transporting, alpha 1 polypeptide	GO:0031944 negative regulation of glucocorticoid metabolic process;GO:0031947 negative regulation of glucocorticoid biosynthetic process;GO:0010248 establishment or maintenance of transmembrane electrochemical gradient		0.0	0.0	1.0	0.0	0.0	0.0	1.0	0.0	0.0	0.0	0.0	0.0	0.0	0.0	0.0	0.0	0.0	0.0	0.0	0.0
ATP1B2	11932	symbol	M. musculus	11932	M. musculus	Atp1b2	ATPase, Na+/K+ transporting, beta 2 polypeptide	GO:0021944 neuronal-glial interaction involved in hindbrain glial-mediated radial cell migration;GO:1903278 positive regulation of sodium ion export across plasma membrane;GO:0021678 third ventricle development		0.0	0.0	1.0	0.0	0.0	0.0	1.0	0.0	0.0	0.0	0.0	0.0	0.0	0.0	0.0	0.0	0.0	0.0	0.0	0.0
ATP2A1	11937	symbol	M. musculus	11937	M. musculus	Atp2a1	ATPase, Ca++ transporting, cardiac muscle, fast twitch 1	GO:0051659 maintenance of mitochondrion location;GO:0031446 regulation of fast-twitch skeletal muscle fiber contraction;GO:0031448 positive regulation of fast-twitch skeletal muscle fiber contraction		0.0	0.0	1.0	0.0	0.0	0.0	0.0	0.0	0.0	0.0	0.0	1.0	0.0	0.0	0.0	0.0	0.0	0.0	0.0	0.0
ATP2B4	381290	symbol	M. musculus	381290	M. musculus	Atp2b4	ATPase, Ca++ transporting, plasma membrane 4	GO:0098736 negative regulation of the force of heart contraction;GO:0033241 regulation of amine catabolic process;GO:0033242 negative regulation of amine catabolic process		0.0	0.0	1.0	0.0	0.0	0.0	0.0	0.0	0.0	0.0	0.0	0.0	0.0	0.0	0.0	0.0	1.0	0.0	0.0	0.0
ATP5F1D	66043	symbol	M. musculus	66043	M. musculus	Atp5f1d	ATP synthase F1 subunit delta	GO:0033615 mitochondrial proton-transporting ATP synthase complex assembly;GO:0043461 proton-transporting ATP synthase complex assembly;GO:0070071 proton-transporting two-sector ATPase complex assembly		0.0	0.0	0.0	0.0	0.0	0.0	0.0	0.0	0.0	0.0	0.0	0.0	0.0	0.0	0.0	0.0	0.0	0.0	1.0	0.0
ATP5F1E	67126	symbol	M. musculus	67126	M. musculus	Atp5f1e	ATP synthase F1 subunit epsilon	GO:0042776 proton motive force-driven mitochondrial ATP synthesis;GO:0015986 proton motive force-driven ATP synthesis;GO:0006754 ATP biosynthetic process		0.0	0.0	0.0	0.0	0.0	0.0	0.0	0.0	0.0	0.0	0.0	0.0	0.0	0.0	0.0	0.0	0.0	0.0	1.0	0.0
ATP5IF1	11983	symbol	M. musculus	11983	M. musculus	Atp5if1	ATP synthase inhibitory factor subunit 1	GO:0051882 mitochondrial depolarization;GO:1901030 positive regulation of mitochondrial outer membrane permeabilization involved in apoptotic signaling pathway;GO:1904925 positive regulation of autophagy of mitochondrion in response to mitochondrial depolarization		0.0	0.0	0.0	0.0	0.0	0.0	0.0	0.0	0.0	0.0	0.0	0.0	0.0	0.0	1.0	0.0	0.0	0.0	0.0	0.0
ATP5ME	11958	symbol	M. musculus	11958	M. musculus	Atp5me	ATP synthase membrane subunit e	GO:0042776 proton motive force-driven mitochondrial ATP synthesis;GO:0015986 proton motive force-driven ATP synthesis;GO:0006754 ATP biosynthetic process		0.0	0.0	0.0	0.0	0.0	0.0	0.0	0.0	0.0	0.0	0.0	0.0	0.0	0.0	0.0	0.0	0.0	0.0	1.0	0.0
ATP6V1F	66144	symbol	M. musculus	66144	M. musculus	Atp6v1f	ATPase, H+ transporting, lysosomal V1 subunit F	GO:0097401 synaptic vesicle lumen acidification;GO:0016188 synaptic vesicle maturation;GO:0070050 neuron cellular homeostasis		0.0	0.0	1.0	0.0	0.0	0.0	0.0	0.0	0.0	1.0	0.0	0.0	0.0	0.0	0.0	0.0	0.0	0.0	0.0	0.0
ATP8B4	241633	symbol	M. musculus	241633	M. musculus	Atp8b4	ATPase, class I, type 8B, member 4	GO:0045332 phospholipid translocation;GO:0034204 lipid translocation;GO:0097035 regulation of membrane lipid distribution		0.0	1.0	1.0	0.0	0.0	0.0	0.0	0.0	0.0	0.0	0.0	0.0	0.0	1.0	0.0	0.0	0.0	0.0	0.0	0.0
ATRNL1	226255	symbol	M. musculus	226255	M. musculus	Atrnl1	attractin like 1	GO:0007186 G protein-coupled receptor signaling pathway;GO:0007165 signal transduction;GO:0023052 signaling		0.0	0.0	0.0	0.0	0.0	0.0	0.0	0.0	0.0	0.0	0.0	0.0	0.0	0.0	0.0	0.0	0.0	0.0	0.0	0.0
AXL	26362	symbol	M. musculus	26362	M. musculus	Axl	AXL receptor tyrosine kinase	GO:0097350 neutrophil clearance;GO:0048549 positive regulation of pinocytosis;GO:0060068 vagina development	yes	0.0	0.0	0.0	0.0	1.0	1.0	1.0	0.0	1.0	0.0	1.0	0.0	0.0	0.0	0.0	1.0	0.0	0.0	0.0	0.0
B3GALNT1	26879	symbol	M. musculus	26879	M. musculus	B3galnt1	UDP-GalNAc:betaGlcNAc beta 1,3-galactosaminyltransferase, polypeptide 1	GO:0009312 oligosaccharide biosynthetic process;GO:0009311 oligosaccharide metabolic process;GO:0006493 protein O-linked glycosylation		0.0	0.0	0.0	0.0	0.0	0.0	0.0	0.0	0.0	0.0	0.0	0.0	0.0	0.0	0.0	0.0	0.0	0.0	1.0	0.0
B4GALNT1	14421	symbol	M. musculus	14421	M. musculus	B4galnt1	beta-1,4-N-acetyl-galactosaminyl transferase 1	GO:0030259 lipid glycosylation;GO:0001574 ganglioside biosynthetic process;GO:0001573 ganglioside metabolic process		0.0	0.0	0.0	0.0	0.0	0.0	0.0	0.0	0.0	0.0	0.0	0.0	0.0	1.0	0.0	0.0	0.0	0.0	0.0	0.0
BAHD1	228536	symbol	M. musculus	228536	M. musculus	Bahd1	bromo adjacent homology domain containing 1	GO:0031507 heterochromatin formation;GO:0045814 negative regulation of gene expression, epigenetic;GO:0040029 epigenetic regulation of gene expression		0.0	0.0	0.0	0.0	0.0	0.0	0.0	0.0	0.0	0.0	0.0	0.0	0.0	0.0	0.0	0.0	0.0	0.0	0.0	0.0
BAIAP2	108100	symbol	M. musculus	108100	M. musculus	Baiap2	brain-specific angiogenesis inhibitor 1-associated protein 2	GO:1905274 regulation of modification of postsynaptic actin cytoskeleton;GO:0051764 actin crosslink formation;GO:0099159 regulation of modification of postsynaptic structure		0.0	0.0	0.0	0.0	0.0	0.0	0.0	0.0	0.0	0.0	0.0	0.0	0.0	0.0	0.0	0.0	1.0	0.0	0.0	0.0
BATF3	381319	symbol	M. musculus	381319	M. musculus	Batf3	basic leucine zipper transcription factor, ATF-like 3	GO:0043011 myeloid dendritic cell differentiation;GO:0001773 myeloid dendritic cell activation;GO:0097028 dendritic cell differentiation		0.0	0.0	0.0	0.0	0.0	0.0	0.0	0.0	0.0	0.0	0.0	0.0	0.0	0.0	0.0	1.0	0.0	0.0	0.0	0.0
BAZ2A	116848	symbol	M. musculus	116848	M. musculus	Baz2a	bromodomain adjacent to zinc finger domain, 2A	GO:0000183 rDNA heterochromatin formation;GO:1990700 nucleolar chromatin organization;GO:0016479 negative regulation of transcription by RNA polymerase I		0.0	0.0	0.0	0.0	0.0	0.0	0.0	0.0	0.0	0.0	0.0	0.0	0.0	0.0	0.0	0.0	0.0	0.0	0.0	0.0
BCDIN3D	75284	symbol	M. musculus	75284	M. musculus	Bcdin3d	BCDIN3 domain containing	GO:2000632 negative regulation of pre-miRNA processing;GO:2000631 regulation of pre-miRNA processing;GO:1903799 negative regulation of miRNA processing		0.0	0.0	0.0	0.0	0.0	0.0	0.0	0.0	0.0	0.0	0.0	0.0	0.0	0.0	0.0	0.0	0.0	0.0	0.0	0.0
BCL2L1	12048	symbol	M. musculus	12048	M. musculus	Bcl2l1	BCL2-like 1	GO:0071839 apoptotic process in bone marrow cell;GO:0046898 response to cycloheximide;GO:0044565 dendritic cell proliferation		0.0	0.0	0.0	0.0	0.0	0.0	0.0	0.0	0.0	0.0	0.0	1.0	0.0	0.0	1.0	0.0	0.0	1.0	0.0	0.0
BCL3	12051	symbol	M. musculus	12051	M. musculus	Bcl3	B cell leukemia/lymphoma 3	GO:0002266 follicular dendritic cell activation;GO:0002268 follicular dendritic cell differentiation;GO:0002315 marginal zone B cell differentiation		0.0	0.0	0.0	0.0	0.0	1.0	0.0	0.0	1.0	0.0	0.0	1.0	0.0	0.0	0.0	1.0	1.0	0.0	0.0	0.0
BCL6	12053	symbol	M. musculus	12053	M. musculus	Bcl6	B cell leukemia/lymphoma 6	GO:1900099 negative regulation of plasma cell differentiation;GO:0032764 negative regulation of mast cell cytokine production;GO:0048294 negative regulation of isotype switching to IgE isotypes		0.0	0.0	0.0	0.0	1.0	1.0	0.0	1.0	0.0	0.0	0.0	1.0	0.0	0.0	0.0	1.0	1.0	0.0	0.0	0.0
BEND4	666938	symbol	M. musculus	666938	M. musculus	Bend4	BEN domain containing 4	GO:0008150 biological_process		0.0	0.0	0.0	0.0	0.0	0.0	0.0	0.0	0.0	0.0	0.0	0.0	0.0	0.0	0.0	0.0	0.0	0.0	0.0	0.0
BEST1	24115	symbol	M. musculus	24115	M. musculus	Best1	bestrophin 1	GO:0061534 gamma-aminobutyric acid secretion, neurotransmission;GO:0030321 transepithelial chloride transport;GO:0014051 gamma-aminobutyric acid secretion		0.0	0.0	1.0	0.0	0.0	0.0	0.0	0.0	0.0	0.0	0.0	0.0	0.0	0.0	0.0	0.0	0.0	0.0	0.0	0.0
BHLHE40	20893	symbol	M. musculus	20893	M. musculus	Bhlhe40	basic helix-loop-helix family, member e40	GO:0043153 entrainment of circadian clock by photoperiod;GO:0009648 photoperiodism;GO:0009649 entrainment of circadian clock		0.0	0.0	0.0	0.0	0.0	0.0	0.0	0.0	0.0	0.0	0.0	0.0	0.0	0.0	0.0	0.0	0.0	0.0	0.0	0.0
BPHL	68021	symbol	M. musculus	68021	M. musculus	Bphl	biphenyl hydrolase like			0.0	0.0	0.0	0.0	0.0	0.0	0.0	0.0	0.0	0.0	0.0	0.0	0.0	0.0	0.0	0.0	0.0	0.0	0.0	0.0
BRMS1	107392	symbol	M. musculus	107392	M. musculus	Brms1	breast cancer metastasis-suppressor 1	GO:2000210 positive regulation of anoikis;GO:0090312 positive regulation of protein deacetylation;GO:2000209 regulation of anoikis		0.0	0.0	0.0	0.0	0.0	0.0	0.0	0.0	0.0	0.0	0.0	1.0	0.0	0.0	0.0	0.0	0.0	0.0	0.0	0.0
BUD13	215051	symbol	M. musculus	215051	M. musculus	Bud13	BUD13 homolog	GO:0000375 RNA splicing, via transesterification reactions;GO:0000377 RNA splicing, via transesterification reactions with bulged adenosine as nucleophile;GO:0000398 mRNA splicing, via spliceosome		1.0	0.0	0.0	0.0	0.0	0.0	0.0	0.0	0.0	0.0	0.0	0.0	0.0	0.0	0.0	0.0	0.0	0.0	0.0	0.0
C11ORF71						None	None	None	None	nan	nan	nan	nan	nan	nan	nan	nan	nan	nan	nan	nan	nan	nan	nan	nan	nan	nan	nan	nan
C11ORF98						None	None	None	None	nan	nan	nan	nan	nan	nan	nan	nan	nan	nan	nan	nan	nan	nan	nan	nan	nan	nan	nan	nan
C16ORF54						None	None	None	None	nan	nan	nan	nan	nan	nan	nan	nan	nan	nan	nan	nan	nan	nan	nan	nan	nan	nan	nan	nan
C18ORF54						None	None	None	None	nan	nan	nan	nan	nan	nan	nan	nan	nan	nan	nan	nan	nan	nan	nan	nan	nan	nan	nan	nan
C19ORF12						None	None	None	None	nan	nan	nan	nan	nan	nan	nan	nan	nan	nan	nan	nan	nan	nan	nan	nan	nan	nan	nan	nan
C19ORF38						None	None	None	None	nan	nan	nan	nan	nan	nan	nan	nan	nan	nan	nan	nan	nan	nan	nan	nan	nan	nan	nan	nan
C19ORF47						None	None	None	None	nan	nan	nan	nan	nan	nan	nan	nan	nan	nan	nan	nan	nan	nan	nan	nan	nan	nan	nan	nan
C1ORF21						None	None	None	None	nan	nan	nan	nan	nan	nan	nan	nan	nan	nan	nan	nan	nan	nan	nan	nan	nan	nan	nan	nan
C1QA	12259	symbol	M. musculus	12259	M. musculus	C1qa	complement component 1, q subcomponent, alpha polypeptide	GO:0150064 vertebrate eye-specific patterning;GO:0150062 complement-mediated synapse pruning;GO:0098883 synapse pruning		1.0	0.0	0.0	0.0	1.0	0.0	0.0	0.0	0.0	0.0	1.0	0.0	0.0	0.0	0.0	1.0	0.0	0.0	0.0	0.0
C3	12266	symbol	M. musculus	12266	M. musculus	C3	complement component 3	GO:0001970 positive regulation of activation of membrane attack complex;GO:0097278 complement-dependent cytotoxicity;GO:0150064 vertebrate eye-specific patterning		1.0	1.0	0.0	0.0	1.0	0.0	0.0	1.0	1.0	0.0	1.0	0.0	0.0	0.0	0.0	1.0	0.0	0.0	0.0	0.0
C3AR1	12267	symbol	M. musculus	12267	M. musculus	C3ar1	complement component 3a receptor 1	GO:0002462 tolerance induction to nonself antigen;GO:0002461 tolerance induction dependent upon immune response;GO:0072126 positive regulation of glomerular mesangial cell proliferation		1.0	1.0	0.0	1.0	1.0	0.0	0.0	1.0	1.0	0.0	1.0	0.0	0.0	0.0	0.0	1.0	1.0	0.0	0.0	0.0
C5AR1	12273	symbol	M. musculus	12273	M. musculus	C5ar1	complement component 5a receptor 1	GO:0038178 complement component C5a signaling pathway;GO:1902947 regulation of tau-protein kinase activity;GO:0021534 cell proliferation in hindbrain		1.0	1.0	0.0	1.0	1.0	0.0	0.0	1.0	1.0	0.0	1.0	0.0	0.0	0.0	0.0	1.0	0.0	0.0	0.0	0.0
C9ORF40						None	None	None	None	nan	nan	nan	nan	nan	nan	nan	nan	nan	nan	nan	nan	nan	nan	nan	nan	nan	nan	nan	nan
CABYR	71132	symbol	M. musculus	71132	M. musculus	Cabyr	calcium binding tyrosine phosphorylation regulated	GO:0048240 sperm capacitation;GO:0019722 calcium-mediated signaling;GO:0048469 cell maturation		0.0	0.0	0.0	0.0	0.0	0.0	0.0	0.0	0.0	0.0	0.0	0.0	0.0	0.0	0.0	0.0	1.0	0.0	0.0	0.0
CACFD1	381356	symbol	M. musculus	381356	M. musculus	Cacfd1	calcium channel flower domain containing 1	GO:0016192 vesicle-mediated transport;GO:0006810 transport;GO:0051234 establishment of localization		0.0	0.0	0.0	0.0	0.0	0.0	0.0	0.0	0.0	0.0	0.0	0.0	0.0	0.0	0.0	0.0	0.0	0.0	0.0	0.0
CACNB1	12295	symbol	M. musculus	12295	M. musculus	Cacnb1	calcium channel, voltage-dependent, beta 1 subunit	GO:1902514 regulation of calcium ion transmembrane transport via high voltage-gated calcium channel;GO:1901385 regulation of voltage-gated calcium channel activity;GO:1904646 cellular response to amyloid-beta		0.0	0.0	0.0	0.0	0.0	0.0	0.0	0.0	0.0	0.0	0.0	0.0	0.0	0.0	0.0	0.0	0.0	0.0	0.0	0.0
CALML4	75600	symbol	M. musculus	75600	M. musculus	Calml4	calmodulin-like 4	GO:1904970 brush border assembly;GO:0022607 cellular component assembly;GO:0044085 cellular component biogenesis		0.0	0.0	0.0	0.0	0.0	0.0	0.0	0.0	1.0	0.0	0.0	0.0	0.0	0.0	0.0	0.0	0.0	0.0	0.0	0.0
CAMK1D	227541	symbol	M. musculus	227541	M. musculus	Camk1d	calcium/calmodulin-dependent protein kinase ID	GO:0060267 positive regulation of respiratory burst;GO:0032793 positive regulation of CREB transcription factor activity;GO:0060263 regulation of respiratory burst	yes	0.0	0.0	0.0	0.0	1.0	0.0	0.0	1.0	0.0	0.0	1.0	1.0	0.0	0.0	0.0	0.0	0.0	0.0	0.0	0.0
CAMKK2	207565	symbol	M. musculus	207565	M. musculus	Camkk2	calcium/calmodulin-dependent protein kinase kinase 2, beta	GO:0061762 CAMKK-AMPK signaling cascade;GO:0019722 calcium-mediated signaling;GO:0046777 protein autophosphorylation	yes	0.0	0.0	0.0	0.0	0.0	0.0	0.0	0.0	0.0	0.0	0.0	0.0	0.0	0.0	0.0	0.0	1.0	0.0	0.0	0.0
CANT1	76025	symbol	M. musculus	76025	M. musculus	Cant1	calcium activated nucleotidase 1	GO:0030166 proteoglycan biosynthetic process;GO:0009191 ribonucleoside diphosphate catabolic process;GO:0009134 nucleoside diphosphate catabolic process		0.0	1.0	0.0	0.0	0.0	0.0	0.0	0.0	0.0	0.0	0.0	0.0	0.0	0.0	0.0	0.0	0.0	0.0	1.0	0.0
CAPN1	12333	symbol	M. musculus	12333	M. musculus	Capn1	calpain 1	GO:0060056 mammary gland involution;GO:0097264 self proteolysis;GO:1903238 positive regulation of leukocyte tethering or rolling		0.0	1.0	0.0	0.0	0.0	0.0	0.0	1.0	0.0	0.0	0.0	1.0	0.0	0.0	0.0	0.0	0.0	1.0	0.0	0.0
CAPN3	12335	symbol	M. musculus	12335	M. musculus	Capn3	calpain 3	GO:1990091 sodium-dependent self proteolysis;GO:0014718 positive regulation of satellite cell activation involved in skeletal muscle regeneration;GO:1990092 calcium-dependent self proteolysis		0.0	0.0	0.0	0.0	0.0	0.0	0.0	0.0	0.0	0.0	0.0	0.0	0.0	0.0	1.0	0.0	0.0	0.0	0.0	0.0
CARM1	59035	symbol	M. musculus	59035	M. musculus	Carm1	coactivator-associated arginine methyltransferase 1	GO:0003420 regulation of growth plate cartilage chondrocyte proliferation;GO:0071932 replication fork reversal;GO:0019919 peptidyl-arginine methylation, to asymmetrical-dimethyl arginine		0.0	0.0	0.0	0.0	0.0	0.0	0.0	0.0	0.0	1.0	1.0	1.0	0.0	0.0	0.0	0.0	0.0	1.0	0.0	0.0
CAST	12380	symbol	M. musculus	12380	M. musculus	Cast	calpastatin	GO:0097340 inhibition of cysteine-type endopeptidase activity;GO:0097341 zymogen inhibition;GO:2000675 negative regulation of type B pancreatic cell apoptotic process		0.0	0.0	0.0	0.0	0.0	0.0	0.0	0.0	0.0	0.0	0.0	0.0	0.0	0.0	1.0	0.0	0.0	0.0	0.0	0.0
CBFA2T3	12398	symbol	M. musculus	12398	M. musculus	Cbfa2t3	CBFA2/RUNX1 translocation partner 3	GO:0030812 negative regulation of nucleotide catabolic process;GO:0033122 negative regulation of purine nucleotide catabolic process;GO:0045820 negative regulation of glycolytic process		0.0	0.0	0.0	0.0	0.0	0.0	0.0	0.0	0.0	0.0	0.0	0.0	0.0	0.0	1.0	1.0	0.0	0.0	0.0	0.0
CCDC12	72654	symbol	M. musculus	72654	M. musculus	Ccdc12	coiled-coil domain containing 12	GO:0008150 biological_process		1.0	0.0	0.0	0.0	0.0	0.0	0.0	0.0	0.0	0.0	0.0	0.0	0.0	0.0	0.0	0.0	0.0	0.0	0.0	0.0
CCDC9	243846	symbol	M. musculus	243846	M. musculus	Ccdc9	coiled-coil domain containing 9	GO:0008150 biological_process		0.0	0.0	0.0	0.0	0.0	0.0	0.0	0.0	0.0	0.0	0.0	0.0	0.0	0.0	0.0	0.0	0.0	0.0	0.0	0.0
CCL18						None	None	None	None	nan	nan	nan	nan	nan	nan	nan	nan	nan	nan	nan	nan	nan	nan	nan	nan	nan	nan	nan	nan
CCL7	20306	symbol	M. musculus	20306	M. musculus	Ccl7	C-C motif chemokine ligand 7	GO:2000501 regulation of natural killer cell chemotaxis;GO:2000503 positive regulation of natural killer cell chemotaxis;GO:0140131 positive regulation of lymphocyte chemotaxis		0.0	0.0	0.0	1.0	1.0	0.0	0.0	1.0	0.0	0.0	1.0	0.0	0.0	0.0	0.0	0.0	0.0	0.0	0.0	0.0
CCND2	12444	symbol	M. musculus	12444	M. musculus	Ccnd2	cyclin D2	GO:0071481 cellular response to X-ray;GO:2000726 negative regulation of cardiac muscle cell differentiation;GO:1905208 negative regulation of cardiocyte differentiation		0.0	0.0	0.0	0.0	0.0	0.0	0.0	0.0	0.0	0.0	0.0	0.0	0.0	0.0	0.0	0.0	0.0	0.0	0.0	0.0
CCR1	12768	symbol	M. musculus	12768	M. musculus	Ccr1	C-C motif chemokine receptor 1	GO:0030502 negative regulation of bone mineralization;GO:0090026 positive regulation of monocyte chemotaxis;GO:0070168 negative regulation of biomineral tissue development		0.0	0.0	0.0	1.0	1.0	0.0	0.0	1.0	0.0	0.0	1.0	0.0	0.0	0.0	0.0	0.0	1.0	0.0	0.0	0.0
CCRL2	54199	symbol	M. musculus	54199	M. musculus	Ccrl2	C-C motif chemokine receptor-like 2	GO:0070098 chemokine-mediated signaling pathway;GO:1990868 response to chemokine;GO:1990869 cellular response to chemokine		0.0	0.0	0.0	1.0	1.0	0.0	0.0	0.0	0.0	0.0	0.0	0.0	0.0	0.0	0.0	0.0	1.0	0.0	0.0	0.0
CD244	18106	gene_synonym	M. musculus	18106	M. musculus	Cd244a	CD244 molecule A	GO:0071661 regulation of granzyme B production;GO:0071663 positive regulation of granzyme B production;GO:2000566 positive regulation of CD8-positive, alpha-beta T cell proliferation		0.0	0.0	0.0	0.0	0.0	0.0	0.0	0.0	1.0	0.0	1.0	0.0	0.0	0.0	0.0	1.0	0.0	0.0	0.0	0.0
CD34	12490	symbol	M. musculus	12490	M. musculus	Cd34	CD34 antigen	GO:0071971 extracellular exosome assembly;GO:0071657 positive regulation of granulocyte colony-stimulating factor production;GO:1901258 positive regulation of macrophage colony-stimulating factor production		0.0	0.0	0.0	1.0	0.0	0.0	0.0	0.0	1.0	0.0	0.0	0.0	0.0	0.0	0.0	0.0	0.0	0.0	0.0	0.0
CD4	12504	symbol	M. musculus	12504	M. musculus	Cd4	CD4 antigen	GO:0035397 helper T cell enhancement of adaptive immune response;GO:0045657 positive regulation of monocyte differentiation;GO:0035723 interleukin-15-mediated signaling pathway		0.0	0.0	0.0	0.0	0.0	1.0	0.0	0.0	0.0	0.0	1.0	0.0	0.0	0.0	0.0	1.0	1.0	0.0	0.0	0.0
CD63	12512	symbol	M. musculus	12512	M. musculus	Cd63	CD63 antigen	GO:0035646 endosome to melanosome transport;GO:0043485 endosome to pigment granule transport;GO:0048757 pigment granule maturation		0.0	1.0	0.0	0.0	0.0	0.0	0.0	0.0	0.0	0.0	0.0	0.0	1.0	0.0	0.0	0.0	0.0	0.0	0.0	0.0
CD74	16149	symbol	M. musculus	16149	M. musculus	Cd74	CD74 antigen (invariant polypeptide of major histocompatibility complex, class II antigen-associated)	GO:0035691 macrophage migration inhibitory factor signaling pathway;GO:2000448 positive regulation of macrophage migration inhibitory factor signaling pathway;GO:2000446 regulation of macrophage migration inhibitory factor signaling pathway		0.0	0.0	0.0	0.0	0.0	0.0	0.0	1.0	1.0	0.0	1.0	0.0	0.0	0.0	0.0	1.0	0.0	0.0	0.0	0.0
CD82	12521	symbol	M. musculus	12521	M. musculus	Cd82	CD82 antigen			0.0	0.0	0.0	0.0	0.0	0.0	0.0	0.0	0.0	0.0	0.0	0.0	0.0	0.0	0.0	0.0	0.0	0.0	0.0	0.0
CD83	12522	symbol	M. musculus	12522	M. musculus	Cd83	CD83 antigen	GO:0032713 negative regulation of interleukin-4 production;GO:0032613 interleukin-10 production;GO:0032633 interleukin-4 production		0.0	0.0	0.0	0.0	0.0	1.0	0.0	0.0	1.0	0.0	0.0	0.0	0.0	0.0	0.0	1.0	0.0	0.0	0.0	0.0
CD84	12523	symbol	M. musculus	12523	M. musculus	Cd84	CD84 antigen	GO:0032685 negative regulation of granulocyte macrophage colony-stimulating factor production;GO:0032701 negative regulation of interleukin-18 production;GO:0043305 negative regulation of mast cell degranulation		0.0	0.0	0.0	0.0	0.0	0.0	0.0	0.0	1.0	0.0	1.0	0.0	0.0	0.0	0.0	1.0	0.0	0.0	0.0	0.0
CD99L2	171486	symbol	M. musculus	171486	M. musculus	Cd99l2	CD99 antigen-like 2	GO:2000409 positive regulation of T cell extravasation;GO:2000407 regulation of T cell extravasation;GO:0050904 diapedesis		0.0	0.0	0.0	1.0	0.0	0.0	0.0	1.0	0.0	0.0	0.0	0.0	0.0	0.0	0.0	0.0	0.0	0.0	0.0	0.0
CDC42BPG	240505	symbol	M. musculus	240505	M. musculus	Cdc42bpg	CDC42 binding protein kinase gamma	GO:0018107 peptidyl-threonine phosphorylation;GO:0018210 peptidyl-threonine modification;GO:0031032 actomyosin structure organization	yes	0.0	0.0	0.0	0.0	0.0	0.0	0.0	0.0	0.0	0.0	0.0	0.0	0.0	0.0	0.0	0.0	0.0	0.0	0.0	0.0
CDC42EP3	260409	symbol	M. musculus	260409	M. musculus	Cdc42ep3	CDC42 effector protein 3	GO:0031272 regulation of pseudopodium assembly;GO:0031274 positive regulation of pseudopodium assembly;GO:0030838 positive regulation of actin filament polymerization		0.0	0.0	0.0	0.0	0.0	0.0	0.0	0.0	0.0	0.0	0.0	0.0	0.0	0.0	0.0	0.0	1.0	0.0	0.0	0.0
CDH1	12550	symbol	M. musculus	12550	M. musculus	Cdh1	cadherin 1	GO:0035847 uterine epithelium development;GO:0035846 oviduct epithelium development;GO:0071680 response to indole-3-methanol		0.0	0.0	0.0	0.0	0.0	0.0	0.0	0.0	0.0	0.0	0.0	0.0	0.0	0.0	1.0	0.0	0.0	1.0	0.0	0.0
CDHR3	68764	symbol	M. musculus	68764	M. musculus	Cdhr3	cadherin-related family member 3	GO:0007156 homophilic cell adhesion via plasma membrane adhesion molecules;GO:0098742 cell-cell adhesion via plasma-membrane adhesion molecules;GO:0098609 cell-cell adhesion		0.0	0.0	0.0	0.0	0.0	0.0	0.0	0.0	0.0	0.0	0.0	0.0	0.0	0.0	0.0	0.0	0.0	0.0	0.0	0.0
CDK16	18555	symbol	M. musculus	18555	M. musculus	Cdk16	cyclin dependent kinase 16	GO:0030252 growth hormone secretion;GO:0030072 peptide hormone secretion;GO:0061178 regulation of insulin secretion involved in cellular response to glucose stimulus	yes	0.0	0.0	0.0	0.0	0.0	0.0	0.0	0.0	0.0	0.0	0.0	0.0	0.0	0.0	0.0	0.0	0.0	0.0	0.0	0.0
CDK2AP2	52004	symbol	M. musculus	52004	M. musculus	Cdk2ap2	cyclin dependent kinase 2 associated protein 2	GO:2000035 regulation of stem cell division;GO:2000134 negative regulation of G1/S transition of mitotic cell cycle;GO:1902807 negative regulation of cell cycle G1/S phase transition		0.0	0.0	0.0	0.0	0.0	0.0	0.0	0.0	0.0	0.0	0.0	0.0	0.0	0.0	0.0	0.0	0.0	0.0	0.0	0.0
CDKN2AIPNL	52626	symbol	M. musculus	52626	M. musculus	Cdkn2aipnl	CDKN2A interacting protein N-terminal like			0.0	0.0	0.0	0.0	0.0	0.0	0.0	0.0	0.0	0.0	0.0	0.0	0.0	0.0	0.0	0.0	0.0	0.0	0.0	0.0
CDON	57810	symbol	M. musculus	57810	M. musculus	Cdon	cell adhesion molecule-related/down-regulated by oncogenes	GO:0060059 embryonic retina morphogenesis in camera-type eye;GO:0014816 skeletal muscle satellite cell differentiation;GO:0010172 embryonic body morphogenesis		0.0	0.0	0.0	0.0	0.0	0.0	0.0	0.0	0.0	0.0	0.0	0.0	0.0	0.0	0.0	0.0	0.0	0.0	0.0	0.0
CENPU	71876	symbol	M. musculus	71876	M. musculus	Cenpu	centromere protein U	GO:0007059 chromosome segregation;GO:0043009 chordate embryonic development;GO:0022402 cell cycle process		0.0	0.0	0.0	0.0	0.0	0.0	0.0	0.0	0.0	0.0	0.0	0.0	0.0	0.0	0.0	0.0	0.0	0.0	0.0	0.0
CEP170B	217882	symbol	M. musculus	217882	M. musculus	Cep170b	centrosomal protein 170B	GO:0008150 biological_process		0.0	0.0	0.0	0.0	0.0	0.0	0.0	0.0	0.0	0.0	0.0	0.0	0.0	0.0	0.0	0.0	0.0	0.0	0.0	0.0
CEPT1	99712	symbol	M. musculus	99712	M. musculus	Cept1	choline/ethanolaminephosphotransferase 1	GO:0006646 phosphatidylethanolamine biosynthetic process;GO:0006656 phosphatidylcholine biosynthetic process;GO:0046337 phosphatidylethanolamine metabolic process		0.0	0.0	0.0	0.0	0.0	0.0	0.0	0.0	0.0	0.0	0.0	0.0	0.0	0.0	0.0	0.0	0.0	0.0	0.0	0.0
CERS5	71949	symbol	M. musculus	71949	M. musculus	Cers5	ceramide synthase 5	GO:0046513 ceramide biosynthetic process;GO:0030148 sphingolipid biosynthetic process;GO:0006672 ceramide metabolic process		0.0	0.0	0.0	0.0	0.0	0.0	0.0	0.0	0.0	0.0	0.0	0.0	0.0	0.0	0.0	0.0	0.0	0.0	0.0	0.0
CFP	18636	symbol	M. musculus	18636	M. musculus	Cfp	complement factor properdin	GO:1903028 positive regulation of opsonization;GO:1903027 regulation of opsonization;GO:0006957 complement activation, alternative pathway		0.0	1.0	0.0	0.0	0.0	0.0	0.0	0.0	0.0	0.0	1.0	0.0	0.0	0.0	0.0	1.0	0.0	0.0	0.0	0.0
CH25H	12642	symbol	M. musculus	12642	M. musculus	Ch25h	cholesterol 25-hydroxylase	GO:1903913 regulation of fusion of virus membrane with host plasma membrane;GO:1903914 negative regulation of fusion of virus membrane with host plasma membrane;GO:0035754 B cell chemotaxis		0.0	0.0	0.0	1.0	0.0	0.0	0.0	0.0	0.0	0.0	1.0	0.0	0.0	0.0	0.0	0.0	0.0	1.0	0.0	0.0
CHEK2	50883	symbol	M. musculus	50883	M. musculus	Chek2	checkpoint kinase 2	GO:0000085 mitotic G2 phase;GO:0051319 G2 phase;GO:2000002 negative regulation of DNA damage checkpoint	yes	0.0	0.0	0.0	0.0	0.0	0.0	0.0	0.0	0.0	0.0	0.0	1.0	0.0	0.0	0.0	0.0	0.0	0.0	0.0	0.0
CHKA	12660	symbol	M. musculus	12660	M. musculus	Chka	choline kinase alpha	GO:0006580 ethanolamine metabolic process;GO:0006657 CDP-choline pathway;GO:0019695 choline metabolic process	yes	0.0	0.0	0.0	0.0	0.0	0.0	0.0	0.0	0.0	0.0	0.0	0.0	0.0	0.0	0.0	0.0	0.0	0.0	0.0	0.0
CHMP4B	75608	symbol	M. musculus	75608	M. musculus	Chmp4b	charged multivesicular body protein 4B	GO:0090611 ubiquitin-independent protein catabolic process via the multivesicular body sorting pathway;GO:0036438 maintenance of lens transparency;GO:0046761 viral budding from plasma membrane		0.0	0.0	0.0	0.0	0.0	0.0	0.0	0.0	0.0	0.0	0.0	0.0	0.0	0.0	0.0	0.0	0.0	0.0	0.0	0.0
CHP1	56398	symbol	M. musculus	56398	M. musculus	Chp1	calcineurin-like EF hand protein 1	GO:0032417 positive regulation of sodium:proton antiporter activity;GO:0032415 regulation of sodium:proton antiporter activity;GO:0060050 positive regulation of protein glycosylation		0.0	0.0	0.0	0.0	0.0	0.0	0.0	0.0	0.0	0.0	0.0	0.0	0.0	0.0	0.0	0.0	0.0	0.0	0.0	0.0
CHST12	59031	symbol	M. musculus	59031	M. musculus	Chst12	carbohydrate sulfotransferase 12	GO:0030208 dermatan sulfate biosynthetic process;GO:0050651 dermatan sulfate proteoglycan biosynthetic process;GO:0030205 dermatan sulfate metabolic process		0.0	0.0	0.0	0.0	0.0	0.0	0.0	0.0	0.0	0.0	0.0	0.0	0.0	0.0	0.0	0.0	0.0	0.0	1.0	0.0
CHURC1	211151	symbol	M. musculus	211151	M. musculus	Churc1	churchill domain containing 1	GO:0008543 fibroblast growth factor receptor signaling pathway;GO:0044344 cellular response to fibroblast growth factor stimulus;GO:0071774 response to fibroblast growth factor		0.0	0.0	0.0	0.0	0.0	0.0	0.0	0.0	0.0	0.0	0.0	0.0	0.0	0.0	0.0	0.0	0.0	0.0	0.0	0.0
CIITA	12265	symbol	M. musculus	12265	M. musculus	Ciita	class II transactivator	GO:0045345 positive regulation of MHC class I biosynthetic process;GO:0045343 regulation of MHC class I biosynthetic process;GO:0045348 positive regulation of MHC class II biosynthetic process	yes	0.0	0.0	0.0	0.0	0.0	0.0	0.0	0.0	1.0	0.0	1.0	0.0	0.0	0.0	0.0	0.0	0.0	0.0	0.0	0.0
CINP	67236	symbol	M. musculus	67236	M. musculus	Cinp	cyclin dependent kinase 2 interacting protein	GO:0042273 ribosomal large subunit biogenesis;GO:0006260 DNA replication;GO:0042254 ribosome biogenesis		1.0	0.0	0.0	0.0	0.0	0.0	0.0	0.0	0.0	0.0	0.0	0.0	0.0	0.0	0.0	0.0	0.0	0.0	0.0	0.0
CITED2	17684	symbol	M. musculus	17684	M. musculus	Cited2	Cbp/p300-interacting transactivator, with Glu/Asp-rich carboxy-terminal domain, 2	GO:0035802 adrenal cortex formation;GO:0035801 adrenal cortex development;GO:0003140 determination of left/right asymmetry in lateral mesoderm		0.0	0.0	0.0	0.0	0.0	0.0	0.0	0.0	0.0	1.0	0.0	0.0	0.0	0.0	0.0	1.0	0.0	0.0	0.0	0.0
CLEC5A	23845	symbol	M. musculus	23845	M. musculus	Clec5a	C-type lectin domain family 5, member a	GO:0002076 osteoblast development;GO:0033033 negative regulation of myeloid cell apoptotic process;GO:0033032 regulation of myeloid cell apoptotic process		0.0	1.0	0.0	0.0	0.0	0.0	0.0	0.0	1.0	0.0	1.0	0.0	0.0	0.0	0.0	0.0	0.0	0.0	0.0	0.0
CLEC6A	56620	gene_synonym	M. musculus	56620	M. musculus	Clec4n	C-type lectin domain family 4, member n	GO:0001879 detection of yeast;GO:0016046 detection of fungus;GO:0002223 stimulatory C-type lectin receptor signaling pathway		0.0	1.0	0.0	0.0	0.0	0.0	0.0	0.0	1.0	0.0	1.0	0.0	0.0	0.0	0.0	1.0	0.0	0.0	0.0	0.0
CLEC7A	56644	symbol	M. musculus	56644	M. musculus	Clec7a	C-type lectin domain family 7, member a	GO:0032491 detection of molecule of fungal origin;GO:0001879 detection of yeast;GO:0016046 detection of fungus		0.0	0.0	0.0	0.0	1.0	0.0	1.0	1.0	1.0	0.0	1.0	1.0	0.0	0.0	1.0	1.0	0.0	0.0	0.0	0.0
CLIC6	209195	symbol	M. musculus	209195	M. musculus	Clic6	chloride intracellular channel 6	GO:0006821 chloride transport;GO:0006820 monoatomic anion transport;GO:0015698 inorganic anion transport		0.0	0.0	0.0	0.0	0.0	0.0	0.0	0.0	0.0	0.0	0.0	0.0	0.0	0.0	0.0	0.0	0.0	0.0	0.0	0.0
CLN3	12752	symbol	M. musculus	12752	M. musculus	Cln3	CLN3 lysosomal/endosomal transmembrane protein, battenin	GO:0090384 phagosome-lysosome docking;GO:1900079 regulation of arginine biosynthetic process;GO:0016243 regulation of autophagosome size		0.0	0.0	1.0	0.0	0.0	0.0	1.0	0.0	0.0	0.0	0.0	0.0	1.0	1.0	1.0	0.0	0.0	0.0	0.0	0.0
CLN6	76524	symbol	M. musculus	76524	M. musculus	Cln6	ceroid-lipofuscinosis, neuronal 6	GO:0031987 locomotion involved in locomotory behavior;GO:0007042 lysosomal lumen acidification;GO:0035751 regulation of lysosomal lumen pH		0.0	0.0	0.0	1.0	0.0	0.0	0.0	0.0	0.0	0.0	0.0	0.0	0.0	0.0	1.0	0.0	0.0	0.0	0.0	0.0
CLUH	74148	symbol	M. musculus	74148	M. musculus	Cluh	clustered mitochondria homolog	GO:0048312 intracellular distribution of mitochondria;GO:0048311 mitochondrion distribution;GO:0051646 mitochondrion localization		0.0	0.0	0.0	0.0	0.0	0.0	0.0	0.0	0.0	0.0	0.0	0.0	0.0	0.0	0.0	0.0	0.0	0.0	0.0	0.0
CLYBL	69634	symbol	M. musculus	69634	M. musculus	Clybl	citrate lyase beta like	GO:0106064 regulation of cobalamin metabolic process;GO:0106121 positive regulation of cobalamin metabolic process;GO:1901403 positive regulation of tetrapyrrole metabolic process		0.0	0.0	0.0	0.0	0.0	0.0	0.0	0.0	0.0	0.0	0.0	0.0	0.0	0.0	0.0	0.0	0.0	0.0	0.0	0.0
CMKLR1	14747	symbol	M. musculus	14747	M. musculus	Cmklr1	chemerin chemokine-like receptor 1	GO:0002430 complement receptor mediated signaling pathway;GO:0032695 negative regulation of interleukin-12 production;GO:0010759 positive regulation of macrophage chemotaxis		0.0	0.0	0.0	1.0	1.0	0.0	0.0	1.0	0.0	0.0	1.0	0.0	0.0	0.0	0.0	0.0	0.0	0.0	0.0	0.0
CMTM3	68119	symbol	M. musculus	68119	M. musculus	Cmtm3	CKLF-like MARVEL transmembrane domain containing 3	GO:0050861 positive regulation of B cell receptor signaling pathway;GO:0050855 regulation of B cell receptor signaling pathway;GO:0050857 positive regulation of antigen receptor-mediated signaling pathway		0.0	0.0	0.0	1.0	0.0	0.0	0.0	0.0	0.0	0.0	1.0	0.0	0.0	0.0	0.0	0.0	0.0	0.0	0.0	0.0
CNNM3	94218	symbol	M. musculus	94218	M. musculus	Cnnm3	cyclin M3	GO:0010960 magnesium ion homeostasis;GO:0098771 inorganic ion homeostasis;GO:0055080 monoatomic cation homeostasis		0.0	0.0	0.0	0.0	0.0	0.0	0.0	0.0	0.0	0.0	0.0	0.0	0.0	0.0	0.0	0.0	0.0	0.0	0.0	0.0
CNR2	12802	symbol	M. musculus	12802	M. musculus	Cnr2	cannabinoid receptor 2	GO:0099552 trans-synaptic signaling by lipid, modulating synaptic transmission;GO:0099553 trans-synaptic signaling by endocannabinoid, modulating synaptic transmission;GO:0099541 trans-synaptic signaling by lipid		0.0	0.0	0.0	1.0	1.0	0.0	0.0	0.0	0.0	0.0	0.0	0.0	0.0	0.0	0.0	0.0	0.0	0.0	0.0	0.0
CNTNAP1	53321	symbol	M. musculus	53321	M. musculus	Cntnap1	contactin associated protein-like 1	GO:0098529 neuromuscular junction development, skeletal muscle fiber;GO:1990227 paranodal junction maintenance;GO:0002175 protein localization to paranode region of axon		0.0	0.0	0.0	0.0	0.0	0.0	0.0	0.0	0.0	0.0	0.0	0.0	0.0	0.0	0.0	0.0	0.0	0.0	0.0	0.0
COG2	76332	symbol	M. musculus	76332	M. musculus	Cog2	component of oligomeric golgi complex 2	GO:0000301 retrograde transport, vesicle recycling within Golgi;GO:0006891 intra-Golgi vesicle-mediated transport;GO:0007030 Golgi organization		0.0	0.0	0.0	0.0	0.0	0.0	0.0	0.0	0.0	0.0	0.0	0.0	0.0	0.0	0.0	0.0	0.0	0.0	0.0	0.0
COL14A1	12818	symbol	M. musculus	12818	M. musculus	Col14a1	collagen, type XIV, alpha 1	GO:0061050 regulation of cell growth involved in cardiac muscle cell development;GO:0048873 homeostasis of number of cells within a tissue;GO:0030199 collagen fibril organization		0.0	0.0	0.0	0.0	0.0	0.0	0.0	0.0	0.0	0.0	0.0	0.0	0.0	0.0	0.0	0.0	0.0	0.0	0.0	0.0
COL20A1	73368	symbol	M. musculus	73368	M. musculus	Col20a1	collagen, type XX, alpha 1			0.0	0.0	0.0	0.0	0.0	0.0	0.0	0.0	0.0	0.0	0.0	0.0	0.0	0.0	0.0	0.0	0.0	0.0	0.0	0.0
COLGALT1	234407	symbol	M. musculus	234407	M. musculus	Colgalt1	collagen beta(1-O)galactosyltransferase 1	GO:1904028 positive regulation of collagen fibril organization;GO:1904026 regulation of collagen fibril organization;GO:1903055 positive regulation of extracellular matrix organization		0.0	0.0	0.0	0.0	0.0	0.0	0.0	0.0	0.0	0.0	0.0	0.0	0.0	0.0	0.0	0.0	0.0	0.0	0.0	0.0
COMMD10	69456	symbol	M. musculus	69456	M. musculus	Commd10	COMM domain containing 10	GO:0008150 biological_process		0.0	0.0	0.0	0.0	0.0	0.0	0.0	0.0	0.0	0.0	0.0	0.0	0.0	0.0	0.0	0.0	0.0	0.0	0.0	0.0
COMMD4	66199	symbol	M. musculus	66199	M. musculus	Commd4	COMM domain containing 4	GO:0008150 biological_process		0.0	0.0	0.0	0.0	0.0	0.0	0.0	0.0	0.0	0.0	0.0	0.0	0.0	0.0	0.0	0.0	0.0	0.0	0.0	0.0
COPS6	26893	symbol	M. musculus	26893	M. musculus	Cops6	COP9 signalosome subunit 6	GO:0000338 protein deneddylation;GO:0070646 protein modification by small protein removal;GO:0070647 protein modification by small protein conjugation or removal		0.0	0.0	0.0	0.0	0.0	0.0	0.0	0.0	0.0	0.0	0.0	0.0	0.0	0.0	0.0	0.0	0.0	0.0	0.0	0.0
CORO1C	23790	symbol	M. musculus	23790	M. musculus	Coro1c	coronin, actin binding protein 1C	GO:0000147 actin cortical patch assembly;GO:0044396 actin cortical patch organization;GO:0097750 endosome membrane tubulation		0.0	0.0	0.0	0.0	0.0	0.0	1.0	0.0	0.0	0.0	0.0	0.0	0.0	0.0	0.0	0.0	0.0	1.0	0.0	0.0
CORO6	216961	symbol	M. musculus	216961	M. musculus	Coro6	coronin 6	GO:0007015 actin filament organization;GO:0030036 actin cytoskeleton organization;GO:0030029 actin filament-based process		0.0	0.0	0.0	0.0	0.0	0.0	0.0	0.0	0.0	0.0	0.0	0.0	0.0	0.0	0.0	0.0	0.0	0.0	0.0	0.0
CORO7	78885	symbol	M. musculus	78885	M. musculus	Coro7	coronin 7	GO:0007030 Golgi organization;GO:0030010 establishment of cell polarity;GO:0007163 establishment or maintenance of cell polarity		0.0	0.0	0.0	0.0	0.0	0.0	0.0	0.0	0.0	0.0	0.0	0.0	0.0	0.0	0.0	0.0	0.0	0.0	0.0	0.0
COTL1	72042	symbol	M. musculus	72042	M. musculus	Cotl1	coactosin like F-actin binding protein 1	GO:0050832 defense response to fungus;GO:0009620 response to fungus;GO:0030833 regulation of actin filament polymerization		0.0	1.0	0.0	0.0	0.0	0.0	0.0	0.0	0.0	0.0	0.0	0.0	0.0	0.0	0.0	0.0	0.0	0.0	0.0	0.0
COX19	68033	symbol	M. musculus	68033	M. musculus	Cox19	cytochrome c oxidase assembly protein 19	GO:0006878 intracellular copper ion homeostasis;GO:0055070 copper ion homeostasis;GO:0033617 mitochondrial cytochrome c oxidase assembly		0.0	0.0	0.0	0.0	0.0	0.0	0.0	0.0	0.0	0.0	0.0	0.0	0.0	0.0	0.0	0.0	0.0	0.0	0.0	0.0
COX4I1	12857	symbol	M. musculus	12857	M. musculus	Cox4i1	cytochrome c oxidase subunit 4I1	GO:0006123 mitochondrial electron transport, cytochrome c to oxygen;GO:0019646 aerobic electron transport chain;GO:0042775 mitochondrial ATP synthesis coupled electron transport		0.0	0.0	0.0	0.0	0.0	0.0	0.0	0.0	0.0	1.0	0.0	0.0	0.0	0.0	0.0	0.0	0.0	0.0	1.0	0.0
COX5A	12858	symbol	M. musculus	12858	M. musculus	Cox5a	cytochrome c oxidase subunit 5A	GO:0006123 mitochondrial electron transport, cytochrome c to oxygen;GO:0019646 aerobic electron transport chain;GO:0042775 mitochondrial ATP synthesis coupled electron transport		0.0	0.0	0.0	0.0	0.0	0.0	0.0	0.0	0.0	1.0	0.0	0.0	0.0	0.0	0.0	0.0	0.0	0.0	1.0	0.0
COX6A1	12861	symbol	M. musculus	12861	M. musculus	Cox6a1	cytochrome c oxidase subunit 6A1	GO:0006123 mitochondrial electron transport, cytochrome c to oxygen;GO:0019646 aerobic electron transport chain;GO:0042775 mitochondrial ATP synthesis coupled electron transport		0.0	0.0	0.0	0.0	0.0	0.0	0.0	0.0	0.0	1.0	0.0	0.0	0.0	0.0	0.0	0.0	0.0	0.0	1.0	0.0
COX6C	12864	symbol	M. musculus	12864	M. musculus	Cox6c	cytochrome c oxidase subunit 6C	GO:0008150 biological_process		0.0	0.0	0.0	0.0	0.0	0.0	0.0	0.0	0.0	1.0	0.0	0.0	0.0	0.0	0.0	0.0	0.0	0.0	0.0	0.0
COX7A2L	20463	symbol	M. musculus	20463	M. musculus	Cox7a2l	cytochrome c oxidase subunit 7A2 like	GO:0097250 mitochondrial respirasome assembly;GO:0006123 mitochondrial electron transport, cytochrome c to oxygen;GO:0002082 regulation of oxidative phosphorylation		0.0	0.0	0.0	0.0	0.0	0.0	0.0	0.0	0.0	1.0	0.0	0.0	0.0	0.0	0.0	0.0	0.0	0.0	1.0	0.0
COX8A	12868	symbol	M. musculus	12868	M. musculus	Cox8a	cytochrome c oxidase subunit 8A	GO:0006123 mitochondrial electron transport, cytochrome c to oxygen;GO:0019646 aerobic electron transport chain;GO:0042775 mitochondrial ATP synthesis coupled electron transport		0.0	0.0	0.0	0.0	0.0	0.0	0.0	0.0	0.0	1.0	0.0	0.0	0.0	0.0	0.0	0.0	0.0	0.0	1.0	0.0
CP	12870	symbol	M. musculus	12870	M. musculus	Cp	ceruloplasmin	GO:0006825 copper ion transport;GO:0006878 intracellular copper ion homeostasis;GO:0055070 copper ion homeostasis		0.0	0.0	1.0	0.0	0.0	0.0	0.0	0.0	0.0	0.0	0.0	0.0	0.0	0.0	0.0	0.0	0.0	0.0	0.0	0.0
CPD	12874	symbol	M. musculus	12874	M. musculus	Cpd	carboxypeptidase D	GO:0006518 peptide metabolic process;GO:0016485 protein processing;GO:0051604 protein maturation		0.0	0.0	0.0	0.0	0.0	0.0	0.0	0.0	0.0	0.0	0.0	0.0	0.0	0.0	0.0	0.0	0.0	0.0	0.0	0.0
CPNE2	234577	symbol	M. musculus	234577	M. musculus	Cpne2	copine II	GO:0071277 cellular response to calcium ion;GO:0051592 response to calcium ion;GO:0071248 cellular response to metal ion		0.0	0.0	0.0	0.0	0.0	0.0	0.0	0.0	0.0	0.0	0.0	0.0	0.0	0.0	0.0	0.0	0.0	0.0	0.0	0.0
CPQ	54381	symbol	M. musculus	54381	M. musculus	Cpq	carboxypeptidase Q	GO:0006590 thyroid hormone generation;GO:0043171 peptide catabolic process;GO:0042403 thyroid hormone metabolic process		0.0	0.0	0.0	0.0	0.0	0.0	0.0	0.0	0.0	0.0	0.0	0.0	0.0	0.0	0.0	0.0	0.0	0.0	0.0	0.0
CRIP1	12925	symbol	M. musculus	12925	M. musculus	Crip1	cysteine-rich protein 1	GO:0071236 cellular response to antibiotic;GO:0071493 cellular response to UV-B;GO:0010224 response to UV-B		0.0	0.0	0.0	0.0	0.0	0.0	0.0	0.0	0.0	0.0	0.0	1.0	0.0	0.0	0.0	0.0	0.0	0.0	0.0	0.0
CRLF2	57914	symbol	M. musculus	57914	M. musculus	Crlf2	cytokine receptor-like factor 2	GO:0035745 T-helper 2 cell cytokine production;GO:0035743 CD4-positive, alpha-beta T cell cytokine production;GO:0032754 positive regulation of interleukin-5 production		0.0	0.0	0.0	0.0	1.0	1.0	0.0	0.0	1.0	0.0	0.0	0.0	0.0	0.0	0.0	1.0	0.0	0.0	0.0	0.0
CRTAP	56693	symbol	M. musculus	56693	M. musculus	Crtap	cartilage associated protein	GO:0018400 peptidyl-proline hydroxylation to 3-hydroxy-L-proline;GO:0019511 peptidyl-proline hydroxylation;GO:0018126 protein hydroxylation		0.0	0.0	0.0	0.0	0.0	0.0	0.0	0.0	0.0	0.0	0.0	0.0	0.0	0.0	0.0	0.0	0.0	0.0	0.0	0.0
CSF2RA	12982	symbol	M. musculus	12982	M. musculus	Csf2ra	colony stimulating factor 2 receptor, alpha, low-affinity (granulocyte-macrophage)	GO:0038157 granulocyte-macrophage colony-stimulating factor signaling pathway;GO:0007259 cell surface receptor signaling pathway via JAK-STAT;GO:0097696 cell surface receptor signaling pathway via STAT		0.0	0.0	0.0	0.0	0.0	0.0	0.0	0.0	0.0	0.0	0.0	0.0	0.0	0.0	0.0	0.0	0.0	0.0	0.0	0.0
CSTB	13014	symbol	M. musculus	13014	M. musculus	Cstb	cystatin B	GO:0008344 adult locomotory behavior;GO:0030534 adult behavior;GO:0010466 negative regulation of peptidase activity		0.0	1.0	0.0	0.0	0.0	0.0	0.0	0.0	0.0	0.0	0.0	0.0	0.0	0.0	1.0	0.0	0.0	0.0	0.0	0.0
CTNNA1	12385	symbol	M. musculus	12385	M. musculus	Ctnna1	catenin alpha 1	GO:2001045 negative regulation of integrin-mediated signaling pathway;GO:0071680 response to indole-3-methanol;GO:0071681 cellular response to indole-3-methanol		0.0	0.0	0.0	0.0	0.0	0.0	0.0	0.0	0.0	0.0	0.0	1.0	0.0	0.0	0.0	0.0	0.0	0.0	0.0	0.0
CTSA	19025	symbol	M. musculus	19025	M. musculus	Ctsa	cathepsin A	GO:1904715 negative regulation of chaperone-mediated autophagy;GO:1904714 regulation of chaperone-mediated autophagy;GO:0010507 negative regulation of autophagy		0.0	1.0	0.0	0.0	0.0	0.0	0.0	0.0	0.0	0.0	0.0	0.0	1.0	0.0	0.0	0.0	0.0	0.0	0.0	0.0
CTSB	13030	symbol	M. musculus	13030	M. musculus	Ctsb	cathepsin B	GO:0006590 thyroid hormone generation;GO:0046697 decidualization;GO:0042403 thyroid hormone metabolic process		0.0	1.0	0.0	0.0	0.0	0.0	0.0	0.0	0.0	0.0	0.0	0.0	1.0	0.0	0.0	0.0	0.0	0.0	0.0	0.0
CTSC	13032	symbol	M. musculus	13032	M. musculus	Ctsc	cathepsin C	GO:1903980 positive regulation of microglial cell activation;GO:0031642 negative regulation of myelination;GO:0150078 positive regulation of neuroinflammatory response		0.0	1.0	0.0	0.0	0.0	0.0	0.0	0.0	0.0	0.0	1.0	1.0	1.0	0.0	1.0	1.0	0.0	0.0	0.0	0.0
CTSE	13034	symbol	M. musculus	13034	M. musculus	Ctse	cathepsin E	GO:0019886 antigen processing and presentation of exogenous peptide antigen via MHC class II;GO:0002495 antigen processing and presentation of peptide antigen via MHC class II;GO:0016540 protein autoprocessing		0.0	0.0	0.0	0.0	0.0	0.0	0.0	0.0	0.0	0.0	0.0	0.0	1.0	0.0	0.0	0.0	0.0	0.0	0.0	0.0
CTSH	13036	symbol	M. musculus	13036	M. musculus	Ctsh	cathepsin H	GO:0060448 dichotomous subdivision of terminal units involved in lung branching;GO:0010813 neuropeptide catabolic process;GO:0010815 bradykinin catabolic process		0.0	1.0	0.0	0.0	0.0	0.0	0.0	1.0	0.0	0.0	1.0	1.0	1.0	0.0	1.0	1.0	1.0	0.0	0.0	0.0
CTSZ	64138	symbol	M. musculus	64138	M. musculus	Ctsz	cathepsin Z	GO:0010757 negative regulation of plasminogen activation;GO:0010755 regulation of plasminogen activation;GO:0010955 negative regulation of protein processing		0.0	1.0	0.0	0.0	0.0	0.0	0.0	0.0	0.0	0.0	0.0	0.0	1.0	0.0	1.0	0.0	0.0	0.0	0.0	0.0
CTU1	233189	symbol	M. musculus	233189	M. musculus	Ctu1	cytosolic thiouridylase subunit 1	GO:0002143 tRNA wobble position uridine thiolation;GO:0034227 tRNA thio-modification;GO:0002098 tRNA wobble uridine modification		0.0	0.0	0.0	0.0	0.0	0.0	0.0	0.0	0.0	0.0	0.0	0.0	0.0	0.0	0.0	0.0	0.0	0.0	0.0	0.0
CXCL14	57266	symbol	M. musculus	57266	M. musculus	Cxcl14	C-X-C motif chemokine ligand 14	GO:2000501 regulation of natural killer cell chemotaxis;GO:2000503 positive regulation of natural killer cell chemotaxis;GO:0140131 positive regulation of lymphocyte chemotaxis		0.0	0.0	0.0	0.0	0.0	0.0	0.0	1.0	0.0	0.0	1.0	0.0	0.0	0.0	0.0	0.0	0.0	0.0	0.0	0.0
CXCL16	66102	symbol	M. musculus	66102	M. musculus	Cxcl16	C-X-C motif chemokine ligand 16	GO:0010818 T cell chemotaxis;GO:0048247 lymphocyte chemotaxis;GO:0072678 T cell migration		0.0	0.0	0.0	1.0	0.0	0.0	1.0	1.0	0.0	0.0	1.0	0.0	0.0	0.0	0.0	0.0	0.0	0.0	0.0	0.0
CYB5R1	72017	symbol	M. musculus	72017	M. musculus	Cyb5r1	cytochrome b5 reductase 1	GO:0016126 sterol biosynthetic process;GO:0006694 steroid biosynthetic process;GO:0016125 sterol metabolic process		0.0	0.0	1.0	0.0	0.0	0.0	0.0	0.0	0.0	0.0	0.0	0.0	0.0	0.0	0.0	0.0	0.0	0.0	0.0	0.0
CYBA	13057	symbol	M. musculus	13057	M. musculus	Cyba	cytochrome b-245, alpha polypeptide	GO:0003083 negative regulation of renal output by angiotensin;GO:0003106 negative regulation of glomerular filtration by angiotensin;GO:0014895 smooth muscle hypertrophy		0.0	1.0	0.0	0.0	1.0	0.0	0.0	0.0	1.0	1.0	1.0	0.0	0.0	0.0	0.0	0.0	0.0	0.0	0.0	0.0
CYBB	13058	symbol	M. musculus	13058	M. musculus	Cybb	cytochrome b-245, beta polypeptide	GO:0097411 hypoxia-inducible factor-1alpha signaling pathway;GO:0050665 hydrogen peroxide biosynthetic process;GO:0045730 respiratory burst		1.0	1.0	0.0	0.0	1.0	0.0	0.0	0.0	1.0	1.0	1.0	0.0	0.0	0.0	0.0	0.0	0.0	0.0	0.0	0.0
CYBC1	217370	symbol	M. musculus	217370	M. musculus	Cybc1	cytochrome b 245 chaperone 1	GO:0045728 respiratory burst after phagocytosis;GO:0002679 respiratory burst involved in defense response;GO:0045730 respiratory burst		0.0	0.0	0.0	0.0	0.0	0.0	0.0	0.0	0.0	0.0	1.0	0.0	0.0	0.0	0.0	1.0	0.0	0.0	0.0	0.0
CYFIP2	76884	symbol	M. musculus	76884	M. musculus	Cyfip2	cytoplasmic FMR1 interacting protein 2	GO:0051388 positive regulation of neurotrophin TRK receptor signaling pathway;GO:0097484 dendrite extension;GO:0097202 activation of cysteine-type endopeptidase activity		0.0	0.0	0.0	0.0	0.0	0.0	0.0	0.0	0.0	0.0	0.0	0.0	0.0	0.0	1.0	0.0	0.0	0.0	0.0	0.0
CYP27A1	104086	symbol	M. musculus	104086	M. musculus	Cyp27a1	cytochrome P450, family 27, subfamily a, polypeptide 1	GO:0036378 calcitriol biosynthetic process from calciol;GO:0042368 vitamin D biosynthetic process;GO:0042362 fat-soluble vitamin biosynthetic process		0.0	0.0	0.0	0.0	0.0	0.0	0.0	0.0	0.0	0.0	0.0	0.0	0.0	0.0	0.0	0.0	0.0	0.0	0.0	0.0
CYP4F3	72054	gene_synonym	M. musculus	72054	M. musculus	Cyp4f18	cytochrome P450, family 4, subfamily f, polypeptide 18	GO:0036102 leukotriene B4 metabolic process;GO:0006691 leukotriene metabolic process;GO:1901568 fatty acid derivative metabolic process		0.0	0.0	0.0	0.0	0.0	0.0	0.0	0.0	0.0	0.0	0.0	0.0	0.0	0.0	0.0	0.0	0.0	0.0	0.0	0.0
CYTH1	19157	symbol	M. musculus	19157	M. musculus	Cyth1	cytohesin 1	GO:0032012 regulation of ARF protein signal transduction;GO:0090162 establishment of epithelial cell polarity;GO:0099171 presynaptic modulation of chemical synaptic transmission		0.0	0.0	0.0	0.0	0.0	0.0	0.0	0.0	0.0	0.0	0.0	0.0	0.0	0.0	0.0	0.0	0.0	0.0	0.0	0.0
CYTH2	19158	symbol	M. musculus	19158	M. musculus	Cyth2	cytohesin 2	GO:2000171 negative regulation of dendrite development;GO:0032012 regulation of ARF protein signal transduction;GO:0050773 regulation of dendrite development		0.0	0.0	0.0	0.0	0.0	0.0	0.0	0.0	0.0	0.0	0.0	0.0	0.0	0.0	0.0	0.0	0.0	1.0	0.0	0.0
CYTIP	227929	symbol	M. musculus	227929	M. musculus	Cytip	cytohesin 1 interacting protein	GO:0030155 regulation of cell adhesion;GO:0050794 regulation of cellular process;GO:0050789 regulation of biological process		0.0	0.0	0.0	0.0	0.0	0.0	0.0	0.0	0.0	0.0	0.0	0.0	0.0	0.0	0.0	0.0	0.0	0.0	0.0	0.0
DAB2	13132	symbol	M. musculus	13132	M. musculus	Dab2	disabled 2, mitogen-responsive phosphoprotein	GO:0035026 leading edge cell differentiation;GO:0032346 positive regulation of aldosterone metabolic process;GO:0032349 positive regulation of aldosterone biosynthetic process		0.0	0.0	0.0	0.0	0.0	0.0	1.0	1.0	0.0	0.0	0.0	1.0	0.0	0.0	1.0	0.0	0.0	1.0	0.0	0.0
DACH1	13134	symbol	M. musculus	13134	M. musculus	Dach1	dachshund family transcription factor 1	GO:0060244 negative regulation of cell proliferation involved in contact inhibition;GO:0060242 contact inhibition;GO:0060245 detection of cell density		0.0	0.0	0.0	0.0	0.0	0.0	0.0	0.0	0.0	0.0	0.0	0.0	0.0	0.0	0.0	0.0	0.0	0.0	0.0	0.0
DAZAP1	70248	symbol	M. musculus	70248	M. musculus	Dazap1	DAZ associated protein 1	GO:0001893 maternal placenta development;GO:0048026 positive regulation of mRNA splicing, via spliceosome;GO:0050685 positive regulation of mRNA processing		0.0	0.0	0.0	0.0	0.0	0.0	0.0	0.0	0.0	0.0	0.0	0.0	0.0	0.0	0.0	0.0	0.0	0.0	0.0	0.0
DCAF15	212123	symbol	M. musculus	212123	M. musculus	Dcaf15	DDB1 and CUL4 associated factor 15	GO:0032814 regulation of natural killer cell activation;GO:0000209 protein polyubiquitination;GO:0016567 protein ubiquitination		0.0	0.0	0.0	0.0	0.0	0.0	0.0	0.0	0.0	0.0	0.0	0.0	0.0	0.0	0.0	0.0	0.0	0.0	0.0	0.0
DCAKD	68087	symbol	M. musculus	68087	M. musculus	Dcakd	dephospho-CoA kinase domain containing	GO:0015937 coenzyme A biosynthetic process;GO:0015936 coenzyme A metabolic process;GO:0033866 nucleoside bisphosphate biosynthetic process		0.0	0.0	0.0	0.0	0.0	0.0	0.0	0.0	0.0	0.0	0.0	0.0	0.0	0.0	0.0	0.0	0.0	0.0	1.0	0.0
DCLRE1B	140917	symbol	M. musculus	140917	M. musculus	Dclre1b	DNA cross-link repair 1B	GO:0031627 telomeric loop formation;GO:0031860 telomeric 3' overhang formation;GO:0031848 protection from non-homologous end joining at telomere		0.0	0.0	0.0	0.0	0.0	0.0	0.0	0.0	0.0	0.0	0.0	0.0	0.0	0.0	0.0	0.0	0.0	0.0	0.0	0.0
DCSTAMP	75766	symbol	M. musculus	75766	M. musculus	Dcstamp	dendrocyte expressed seven transmembrane protein	GO:0034241 positive regulation of macrophage fusion;GO:0034239 regulation of macrophage fusion;GO:0036005 response to macrophage colony-stimulating factor		0.0	0.0	0.0	0.0	0.0	0.0	0.0	0.0	0.0	0.0	0.0	0.0	0.0	0.0	0.0	1.0	0.0	0.0	0.0	0.0
DCXR	67880	symbol	M. musculus	67880	M. musculus	Dcxr	dicarbonyl L-xylulose reductase	GO:0005997 xylulose metabolic process;GO:0042732 D-xylose metabolic process;GO:0006064 glucuronate catabolic process		0.0	0.0	0.0	0.0	0.0	0.0	0.0	0.0	0.0	0.0	0.0	0.0	0.0	0.0	0.0	0.0	0.0	0.0	1.0	0.0
DDX41	72935	symbol	M. musculus	72935	M. musculus	Ddx41	DEAD box helicase 41	GO:0035458 cellular response to interferon-beta;GO:0035456 response to interferon-beta;GO:0000375 RNA splicing, via transesterification reactions		1.0	0.0	0.0	0.0	0.0	0.0	0.0	0.0	0.0	0.0	0.0	0.0	0.0	0.0	0.0	0.0	0.0	0.0	0.0	0.0
DENND1A	227801	symbol	M. musculus	227801	M. musculus	Dennd1a	DENN domain containing 1A	GO:0032483 regulation of Rab protein signal transduction;GO:0048488 synaptic vesicle endocytosis;GO:0140238 presynaptic endocytosis		0.0	0.0	0.0	0.0	0.0	0.0	1.0	0.0	0.0	0.0	0.0	0.0	0.0	0.0	0.0	0.0	0.0	0.0	0.0	0.0
DENND4B	229541	symbol	M. musculus	229541	M. musculus	Dennd4b	DENN domain containing 4B	GO:0032483 regulation of Rab protein signal transduction;GO:0051056 regulation of small GTPase mediated signal transduction;GO:1902531 regulation of intracellular signal transduction		0.0	0.0	0.0	0.0	0.0	0.0	0.0	0.0	0.0	0.0	0.0	0.0	0.0	0.0	0.0	0.0	0.0	0.0	0.0	0.0
DEPTOR	97998	symbol	M. musculus	97998	M. musculus	Deptor	DEP domain containing MTOR-interacting protein	GO:1903940 negative regulation of TORC2 signaling;GO:1903939 regulation of TORC2 signaling;GO:0045792 negative regulation of cell size		0.0	0.0	0.0	0.0	0.0	0.0	0.0	0.0	0.0	0.0	0.0	0.0	0.0	0.0	0.0	0.0	0.0	0.0	0.0	0.0
DGKZ	104418	symbol	M. musculus	104418	M. musculus	Dgkz	diacylglycerol kinase zeta	GO:0099562 maintenance of postsynaptic density structure;GO:0046834 lipid phosphorylation;GO:0098880 maintenance of postsynaptic specialization structure	yes	0.0	0.0	0.0	0.0	0.0	0.0	0.0	0.0	0.0	0.0	0.0	0.0	0.0	0.0	0.0	0.0	1.0	0.0	0.0	0.0
DHPS	330817	symbol	M. musculus	330817	M. musculus	Dhps	deoxyhypusine synthase	GO:0008612 peptidyl-lysine modification to peptidyl-hypusine;GO:0046203 spermidine catabolic process;GO:0006598 polyamine catabolic process		0.0	0.0	0.0	0.0	0.0	0.0	0.0	0.0	0.0	0.0	0.0	0.0	0.0	0.0	0.0	0.0	0.0	0.0	0.0	0.0
DHRS3	20148	symbol	M. musculus	20148	M. musculus	Dhrs3	dehydrogenase/reductase 3	GO:0048387 negative regulation of retinoic acid receptor signaling pathway;GO:0048385 regulation of retinoic acid receptor signaling pathway;GO:0001523 retinoid metabolic process		0.0	0.0	0.0	0.0	0.0	0.0	0.0	0.0	0.0	0.0	0.0	0.0	0.0	0.0	0.0	0.0	0.0	0.0	0.0	0.0
DHRS7	66375	symbol	M. musculus	66375	M. musculus	Dhrs7	dehydrogenase/reductase 7	GO:0042572 retinol metabolic process;GO:0001523 retinoid metabolic process;GO:0016101 diterpenoid metabolic process		0.0	0.0	0.0	0.0	0.0	0.0	0.0	0.0	0.0	0.0	0.0	0.0	0.0	0.0	0.0	0.0	0.0	0.0	0.0	0.0
DHX40	67487	symbol	M. musculus	67487	M. musculus	Dhx40	DEAH-box helicase 40			0.0	0.0	0.0	0.0	0.0	0.0	0.0	0.0	0.0	0.0	0.0	0.0	0.0	0.0	0.0	0.0	0.0	0.0	0.0	0.0
DHX58	80861	symbol	M. musculus	80861	M. musculus	Dhx58	DExH-box helicase 58	GO:1900245 positive regulation of MDA-5 signaling pathway;GO:0039534 negative regulation of MDA-5 signaling pathway;GO:0039533 regulation of MDA-5 signaling pathway		0.0	0.0	0.0	0.0	0.0	0.0	0.0	0.0	1.0	0.0	1.0	0.0	0.0	0.0	0.0	0.0	0.0	0.0	0.0	0.0
DIAPH1	13367	symbol	M. musculus	13367	M. musculus	Diaph1	diaphanous related formin 1	GO:0071965 multicellular organismal locomotion;GO:0106028 neuron projection retraction;GO:0016199 axon midline choice point recognition		0.0	1.0	0.0	1.0	0.0	0.0	1.0	1.0	0.0	0.0	0.0	0.0	0.0	0.0	0.0	0.0	0.0	1.0	0.0	0.0
DMAC1	66928	symbol	M. musculus	66928	M. musculus	Dmac1	distal membrane arm assembly complex 1	GO:0010257 NADH dehydrogenase complex assembly;GO:0032981 mitochondrial respiratory chain complex I assembly;GO:0033108 mitochondrial respiratory chain complex assembly		0.0	0.0	0.0	0.0	0.0	0.0	0.0	0.0	0.0	0.0	0.0	0.0	0.0	0.0	0.0	0.0	0.0	0.0	0.0	0.0
DNA2	327762	symbol	M. musculus	327762	M. musculus	Dna2	DNA replication helicase/nuclease 2	GO:0033567 DNA replication, Okazaki fragment processing;GO:1902990 mitotic telomere maintenance via semi-conservative replication;GO:0006273 lagging strand elongation		0.0	0.0	0.0	0.0	0.0	0.0	0.0	0.0	0.0	0.0	0.0	0.0	0.0	0.0	0.0	0.0	0.0	0.0	0.0	0.0
DNAH2	327954	symbol	M. musculus	327954	M. musculus	Dnah2	dynein, axonemal, heavy chain 2	GO:0036159 inner dynein arm assembly;GO:0070286 axonemal dynein complex assembly;GO:0035082 axoneme assembly		0.0	0.0	0.0	0.0	0.0	0.0	0.0	0.0	0.0	0.0	0.0	0.0	0.0	0.0	0.0	0.0	0.0	0.0	0.0	0.0
DNAJB13	69387	symbol	M. musculus	69387	M. musculus	Dnajb13	DnaJ heat shock protein family (Hsp40) member B13	GO:1904158 axonemal central apparatus assembly;GO:0007618 mating;GO:0051085 chaperone cofactor-dependent protein refolding		0.0	0.0	0.0	0.0	0.0	0.0	0.0	0.0	0.0	0.0	0.0	0.0	0.0	0.0	0.0	0.0	0.0	0.0	0.0	0.0
DNAJC28	246738	symbol	M. musculus	246738	M. musculus	Dnajc28	DnaJ heat shock protein family (Hsp40) member C28			0.0	0.0	0.0	0.0	0.0	0.0	0.0	0.0	0.0	0.0	0.0	0.0	0.0	0.0	0.0	0.0	0.0	0.0	0.0	0.0
DNASE1L1	69537	symbol	M. musculus	69537	M. musculus	Dnase1l1	deoxyribonuclease 1-like 1	GO:0006308 DNA catabolic process;GO:0141188 nucleic acid catabolic process;GO:0034655 nucleobase-containing compound catabolic process		0.0	1.0	0.0	0.0	0.0	0.0	0.0	0.0	0.0	0.0	0.0	0.0	0.0	0.0	0.0	0.0	0.0	0.0	0.0	0.0
DNASE2	13423	gene_synonym	M. musculus	13423	M. musculus	Dnase2a	deoxyribonuclease II alpha	GO:0006309 apoptotic DNA fragmentation;GO:0043353 enucleate erythrocyte differentiation;GO:0006308 DNA catabolic process		0.0	0.0	0.0	0.0	0.0	0.0	0.0	0.0	0.0	0.0	0.0	0.0	1.0	0.0	0.0	0.0	0.0	0.0	0.0	0.0
DOCK6	319899	symbol	M. musculus	319899	M. musculus	Dock6	dedicator of cytokinesis 6	GO:0043547 positive regulation of GTPase activity;GO:0007264 small GTPase-mediated signal transduction;GO:0043087 regulation of GTPase activity		0.0	0.0	0.0	0.0	0.0	0.0	0.0	0.0	0.0	0.0	0.0	0.0	0.0	0.0	0.0	0.0	1.0	0.0	0.0	0.0
DOK3	27261	symbol	M. musculus	27261	M. musculus	Dok3	docking protein 3	GO:0007265 Ras protein signal transduction;GO:0007264 small GTPase-mediated signal transduction;GO:0007169 cell surface receptor protein tyrosine kinase signaling pathway		0.0	1.0	0.0	0.0	0.0	0.0	0.0	0.0	0.0	0.0	0.0	0.0	0.0	0.0	0.0	0.0	1.0	0.0	0.0	0.0
DPH7	67228	symbol	M. musculus	67228	M. musculus	Dph7	diphthamine biosynethesis 7	GO:0017183 protein histidyl modification to diphthamide;GO:0018202 peptidyl-histidine modification;GO:0018193 peptidyl-amino acid modification		0.0	0.0	0.0	0.0	0.0	0.0	0.0	0.0	0.0	0.0	0.0	0.0	0.0	0.0	0.0	0.0	0.0	0.0	0.0	0.0
DPP7	83768	symbol	M. musculus	83768	M. musculus	Dpp7	dipeptidylpeptidase 7	GO:1905146 lysosomal protein catabolic process;GO:0007039 protein catabolic process in the vacuole;GO:0030163 protein catabolic process		0.0	1.0	0.0	0.0	0.0	0.0	0.0	0.0	0.0	0.0	0.0	0.0	0.0	0.0	0.0	0.0	0.0	0.0	0.0	0.0
DR1	13486	symbol	M. musculus	13486	M. musculus	Dr1	down-regulator of transcription 1	GO:0090043 regulation of tubulin deacetylation;GO:0090311 regulation of protein deacetylation;GO:0051123 RNA polymerase II preinitiation complex assembly		0.0	0.0	0.0	0.0	0.0	0.0	0.0	0.0	0.0	0.0	0.0	0.0	0.0	0.0	0.0	0.0	0.0	0.0	0.0	0.0
DUSP1	19252	symbol	M. musculus	19252	M. musculus	Dusp1	dual specificity phosphatase 1	GO:0070262 peptidyl-serine dephosphorylation;GO:0090027 negative regulation of monocyte chemotaxis;GO:1903753 negative regulation of p38MAPK cascade		0.0	0.0	0.0	0.0	0.0	0.0	0.0	1.0	0.0	0.0	0.0	1.0	0.0	0.0	0.0	0.0	0.0	0.0	0.0	1.0
DVL1	13542	symbol	M. musculus	13542	M. musculus	Dvl1	dishevelled segment polarity protein 1	GO:0014022 neural plate elongation;GO:0022007 convergent extension involved in neural plate elongation;GO:0060029 convergent extension involved in organogenesis		0.0	0.0	0.0	0.0	0.0	0.0	0.0	0.0	0.0	0.0	0.0	0.0	0.0	0.0	0.0	0.0	0.0	0.0	0.0	0.0
E2F1	13555	symbol	M. musculus	13555	M. musculus	E2f1	E2F transcription factor 1	GO:1990086 lens fiber cell apoptotic process;GO:0070345 negative regulation of fat cell proliferation;GO:0043276 anoikis		0.0	0.0	0.0	0.0	0.0	0.0	0.0	0.0	0.0	0.0	0.0	1.0	0.0	0.0	0.0	0.0	0.0	0.0	0.0	0.0
ECE1	230857	symbol	M. musculus	230857	M. musculus	Ece1	endothelin converting enzyme 1	GO:0010816 calcitonin catabolic process;GO:0034959 endothelin maturation;GO:0010814 substance P catabolic process		0.0	0.0	0.0	0.0	0.0	0.0	0.0	0.0	0.0	0.0	0.0	0.0	0.0	0.0	0.0	0.0	0.0	0.0	0.0	0.0
ECHS1	93747	symbol	M. musculus	93747	M. musculus	Echs1	enoyl Coenzyme A hydratase, short chain, 1, mitochondrial	GO:0006635 fatty acid beta-oxidation;GO:0019395 fatty acid oxidation;GO:0009062 fatty acid catabolic process		0.0	0.0	0.0	0.0	0.0	0.0	0.0	0.0	0.0	0.0	0.0	0.0	0.0	0.0	0.0	0.0	0.0	0.0	0.0	0.0
EEF1B2	55949	symbol	M. musculus	55949	M. musculus	Eef1b2	eukaryotic translation elongation factor 1 beta 2	GO:0045471 response to ethanol;GO:0006414 translational elongation;GO:0097305 response to alcohol		1.0	0.0	0.0	0.0	0.0	0.0	0.0	0.0	0.0	0.0	0.0	0.0	0.0	0.0	0.0	0.0	0.0	0.0	0.0	0.0
EEF1D	66656	symbol	M. musculus	66656	M. musculus	Eef1d	eukaryotic translation elongation factor 1 delta	GO:0034605 cellular response to heat;GO:0071479 cellular response to ionizing radiation;GO:0006414 translational elongation		1.0	0.0	0.0	0.0	0.0	0.0	0.0	0.0	0.0	0.0	0.0	0.0	0.0	0.0	0.0	0.0	0.0	0.0	0.0	0.0
EEF2	13629	symbol	M. musculus	13629	M. musculus	Eef2	eukaryotic translation elongation factor 2	GO:2000767 positive regulation of cytoplasmic translation;GO:2000765 regulation of cytoplasmic translation;GO:0140241 translation at synapse		1.0	1.0	0.0	0.0	0.0	0.0	0.0	0.0	0.0	0.0	0.0	0.0	0.0	0.0	0.0	0.0	0.0	0.0	0.0	0.0
EEPD1	67484	symbol	M. musculus	67484	M. musculus	Eepd1	endonuclease/exonuclease/phosphatase family domain containing 1	GO:0010875 positive regulation of cholesterol efflux;GO:0032373 positive regulation of sterol transport;GO:0032376 positive regulation of cholesterol transport		0.0	0.0	0.0	0.0	0.0	0.0	0.0	0.0	0.0	0.0	0.0	0.0	0.0	0.0	0.0	0.0	0.0	0.0	0.0	0.0
EGLN2	112406	symbol	M. musculus	112406	M. musculus	Egln2	egl-9 family hypoxia-inducible factor 2	GO:0018401 peptidyl-proline hydroxylation to 4-hydroxy-L-proline;GO:0019471 4-hydroxyproline metabolic process;GO:0019511 peptidyl-proline hydroxylation		0.0	0.0	0.0	0.0	0.0	0.0	0.0	0.0	0.0	1.0	0.0	0.0	0.0	0.0	0.0	0.0	0.0	0.0	0.0	0.0
EHBP1L1	114601	symbol	M. musculus	114601	M. musculus	Ehbp1l1	EH domain binding protein 1-like 1			0.0	0.0	0.0	0.0	0.0	0.0	0.0	0.0	0.0	0.0	0.0	0.0	0.0	0.0	0.0	0.0	0.0	0.0	0.0	0.0
EHHADH	74147	symbol	M. musculus	74147	M. musculus	Ehhadh	enoyl-Coenzyme A, hydratase/3-hydroxyacyl Coenzyme A dehydrogenase	GO:0006635 fatty acid beta-oxidation;GO:0019395 fatty acid oxidation;GO:0006637 acyl-CoA metabolic process		0.0	0.0	0.0	0.0	0.0	0.0	0.0	0.0	0.0	0.0	0.0	0.0	0.0	0.0	0.0	0.0	0.0	0.0	1.0	0.0
EIF3F	66085	symbol	M. musculus	66085	M. musculus	Eif3f	eukaryotic translation initiation factor 3, subunit F	GO:0075522 IRES-dependent viral translational initiation;GO:0019081 viral translation;GO:0019080 viral gene expression		1.0	0.0	0.0	0.0	0.0	0.0	0.0	0.0	0.0	0.0	0.0	0.0	0.0	0.0	0.0	0.0	0.0	0.0	0.0	0.0
EIF3H	68135	symbol	M. musculus	68135	M. musculus	Eif3h	eukaryotic translation initiation factor 3, subunit H	GO:0032435 negative regulation of proteasomal ubiquitin-dependent protein catabolic process;GO:1901799 negative regulation of proteasomal protein catabolic process;GO:2000059 negative regulation of ubiquitin-dependent protein catabolic process		1.0	0.0	0.0	0.0	0.0	0.0	0.0	0.0	0.0	0.0	0.0	0.0	0.0	0.0	1.0	0.0	0.0	0.0	0.0	0.0
EIF3K	73830	symbol	M. musculus	73830	M. musculus	Eif3k	eukaryotic translation initiation factor 3, subunit K	GO:0006446 regulation of translational initiation;GO:0006413 translational initiation;GO:0006417 regulation of translation		1.0	0.0	0.0	0.0	0.0	0.0	0.0	0.0	0.0	0.0	0.0	0.0	0.0	0.0	0.0	0.0	0.0	0.0	0.0	0.0
EIF4EBP1	13685	symbol	M. musculus	13685	M. musculus	Eif4ebp1	eukaryotic translation initiation factor 4E binding protein 1	GO:0002190 cap-independent translational initiation;GO:0002192 IRES-dependent translational initiation of linear mRNA;GO:0110017 cap-independent translational initiation of linear mRNA		1.0	0.0	0.0	0.0	0.0	0.0	0.0	0.0	0.0	0.0	0.0	0.0	0.0	0.0	0.0	0.0	0.0	1.0	0.0	0.0
ELK1	13712	symbol	M. musculus	13712	M. musculus	Elk1	ELK1, member of ETS oncogene family	GO:0110088 hippocampal neuron apoptotic process;GO:0071480 cellular response to gamma radiation;GO:0010332 response to gamma radiation		0.0	0.0	0.0	0.0	0.0	0.0	0.0	0.0	0.0	0.0	0.0	0.0	0.0	0.0	0.0	0.0	0.0	0.0	0.0	0.0
ELOF1	66126	symbol	M. musculus	66126	M. musculus	Elof1	ELF1 homolog, elongation factor 1	GO:0006368 transcription elongation by RNA polymerase II;GO:0006354 DNA-templated transcription elongation;GO:0006366 transcription by RNA polymerase II		0.0	0.0	0.0	0.0	0.0	0.0	0.0	0.0	0.0	0.0	0.0	0.0	0.0	0.0	0.0	0.0	0.0	0.0	0.0	0.0
EMB	13723	symbol	M. musculus	13723	M. musculus	Emb	embigin	GO:0035879 plasma membrane lactate transport;GO:0015727 lactate transport;GO:0035873 lactate transmembrane transport		0.0	0.0	1.0	0.0	0.0	0.0	0.0	0.0	0.0	0.0	0.0	0.0	0.0	0.0	0.0	0.0	0.0	0.0	0.0	0.0
EMC6	66048	symbol	M. musculus	66048	M. musculus	Emc6	ER membrane protein complex subunit 6	GO:0045050 protein insertion into ER membrane by stop-transfer membrane-anchor sequence;GO:0071816 tail-anchored membrane protein insertion into ER membrane;GO:0045048 protein insertion into ER membrane		0.0	0.0	0.0	0.0	0.0	0.0	0.0	0.0	0.0	0.0	0.0	0.0	0.0	0.0	0.0	0.0	0.0	0.0	0.0	0.0
EMILIN1	100952	symbol	M. musculus	100952	M. musculus	Emilin1	elastin microfibril interfacer 1	GO:1904027 negative regulation of collagen fibril organization;GO:1904026 regulation of collagen fibril organization;GO:0048251 elastic fiber assembly		0.0	0.0	0.0	0.0	0.0	0.0	0.0	1.0	0.0	0.0	1.0	0.0	0.0	0.0	0.0	0.0	0.0	1.0	0.0	0.0
EMILIN2	246707	symbol	M. musculus	246707	M. musculus	Emilin2	elastin microfibril interfacer 2	GO:1901731 positive regulation of platelet aggregation;GO:1900426 positive regulation of defense response to bacterium;GO:0034112 positive regulation of homotypic cell-cell adhesion		0.0	0.0	0.0	0.0	0.0	0.0	0.0	0.0	0.0	0.0	1.0	1.0	0.0	0.0	0.0	0.0	0.0	0.0	0.0	0.0
EMP3	13732	symbol	M. musculus	13732	M. musculus	Emp3	epithelial membrane protein 3	GO:0032060 bleb assembly;GO:0120031 plasma membrane bounded cell projection assembly;GO:0030031 cell projection assembly		0.0	0.0	0.0	0.0	0.0	0.0	0.0	0.0	0.0	0.0	0.0	0.0	0.0	0.0	0.0	0.0	0.0	0.0	0.0	0.0
ENPP1	18605	symbol	M. musculus	18605	M. musculus	Enpp1	ectonucleotide pyrophosphatase/phosphodiesterase 1	GO:0019634 organic phosphonate metabolic process;GO:1904124 microglial cell migration;GO:1904384 cellular response to sodium phosphate		0.0	0.0	0.0	1.0	1.0	1.0	0.0	0.0	0.0	0.0	0.0	0.0	0.0	1.0	0.0	1.0	0.0	0.0	1.0	0.0
ENPP4	224794	symbol	M. musculus	224794	M. musculus	Enpp4	ectonucleotide pyrophosphatase/phosphodiesterase 4	GO:0046130 purine ribonucleoside catabolic process;GO:0006152 purine nucleoside catabolic process;GO:0042454 ribonucleoside catabolic process		0.0	1.0	0.0	0.0	0.0	0.0	0.0	0.0	0.0	0.0	0.0	0.0	0.0	0.0	0.0	0.0	0.0	0.0	1.0	0.0
EOGT	101351	symbol	M. musculus	101351	M. musculus	Eogt	EGF domain specific O-linked N-acetylglucosamine transferase	GO:0097370 protein O-GlcNAcylation via threonine;GO:0018243 protein O-linked glycosylation via threonine;GO:0018210 peptidyl-threonine modification		0.0	0.0	0.0	0.0	0.0	0.0	0.0	0.0	0.0	0.0	0.0	0.0	0.0	0.0	0.0	0.0	0.0	0.0	0.0	0.0
EPB41L1	13821	symbol	M. musculus	13821	M. musculus	Epb41l1	erythrocyte membrane protein band 4.1 like 1	GO:0099145 regulation of exocytic insertion of neurotransmitter receptor to postsynaptic membrane;GO:1902683 regulation of receptor localization to synapse;GO:0030866 cortical actin cytoskeleton organization		0.0	0.0	0.0	0.0	0.0	0.0	0.0	0.0	0.0	0.0	0.0	0.0	0.0	0.0	0.0	0.0	0.0	0.0	0.0	0.0
ERLIN1	226144	symbol	M. musculus	226144	M. musculus	Erlin1	ER lipid raft associated 1	GO:0045541 negative regulation of cholesterol biosynthetic process;GO:0106119 negative regulation of sterol biosynthetic process;GO:0090206 negative regulation of cholesterol metabolic process		0.0	0.0	1.0	0.0	0.0	0.0	0.0	0.0	0.0	0.0	0.0	0.0	0.0	0.0	0.0	0.0	0.0	0.0	0.0	0.0
ESYT1	23943	symbol	M. musculus	23943	M. musculus	Esyt1	extended synaptotagmin-like protein 1	GO:0061817 endoplasmic reticulum-plasma membrane tethering;GO:0120009 intermembrane lipid transfer;GO:0051643 endoplasmic reticulum localization		0.0	0.0	1.0	0.0	0.0	0.0	0.0	0.0	0.0	0.0	0.0	0.0	0.0	1.0	0.0	0.0	0.0	0.0	0.0	0.0
ETS2	23872	symbol	M. musculus	23872	M. musculus	Ets2	E26 avian leukemia oncogene 2, 3' domain	GO:0001712 ectodermal cell fate commitment;GO:0001705 ectoderm formation;GO:0010668 ectodermal cell differentiation		0.0	0.0	0.0	0.0	0.0	0.0	0.0	0.0	0.0	1.0	0.0	0.0	0.0	0.0	0.0	0.0	0.0	0.0	0.0	0.0
EXOC6	107371	symbol	M. musculus	107371	M. musculus	Exoc6	exocyst complex component 6	GO:0090522 vesicle tethering involved in exocytosis;GO:0099022 vesicle tethering;GO:0090148 membrane fission		0.0	0.0	0.0	0.0	0.0	0.0	0.0	0.0	0.0	0.0	0.0	0.0	0.0	0.0	0.0	0.0	0.0	0.0	0.0	0.0
EXOSC5	27998	symbol	M. musculus	27998	M. musculus	Exosc5	exosome component 5	GO:0034475 U4 snRNA 3'-end processing;GO:0045006 DNA deamination;GO:0071051 poly(A)-dependent snoRNA 3'-end processing		1.0	0.0	0.0	0.0	0.0	0.0	0.0	0.0	0.0	0.0	0.0	0.0	0.0	0.0	0.0	0.0	0.0	0.0	0.0	0.0
EXT1	14042	symbol	M. musculus	14042	M. musculus	Ext1	exostosin glycosyltransferase 1	GO:0036339 lymphocyte adhesion to endothelial cell of high endothelial venule;GO:0060506 smoothened signaling pathway involved in lung development;GO:0060792 sweat gland development		0.0	0.0	0.0	1.0	1.0	1.0	0.0	0.0	0.0	0.0	0.0	0.0	0.0	0.0	0.0	0.0	0.0	0.0	1.0	0.0
EXTL3	54616	symbol	M. musculus	54616	M. musculus	Extl3	exostosin-like glycosyltransferase 3	GO:2000970 regulation of detection of glucose;GO:2000972 positive regulation of detection of glucose;GO:0045617 negative regulation of keratinocyte differentiation		0.0	0.0	0.0	0.0	0.0	0.0	0.0	0.0	0.0	0.0	0.0	0.0	0.0	0.0	0.0	0.0	0.0	0.0	0.0	0.0
EZR	22350	symbol	M. musculus	22350	M. musculus	Ezr	ezrin	GO:0072697 protein localization to cell cortex;GO:1902896 terminal web assembly;GO:0001951 intestinal D-glucose absorption		0.0	0.0	0.0	0.0	0.0	0.0	1.0	0.0	0.0	0.0	0.0	0.0	0.0	0.0	0.0	0.0	0.0	0.0	0.0	1.0
FADS3	60527	symbol	M. musculus	60527	M. musculus	Fads3	fatty acid desaturase 3	GO:0006633 fatty acid biosynthetic process;GO:0072330 monocarboxylic acid biosynthetic process;GO:0046394 carboxylic acid biosynthetic process		0.0	0.0	0.0	0.0	0.0	0.0	0.0	0.0	0.0	0.0	0.0	0.0	0.0	0.0	0.0	0.0	0.0	0.0	0.0	0.0
FAM110B	242297	symbol	M. musculus	242297	M. musculus	Fam110b	family with sequence similarity 110, member B	GO:0008150 biological_process		0.0	0.0	0.0	0.0	0.0	0.0	0.0	0.0	0.0	0.0	0.0	0.0	0.0	0.0	0.0	0.0	0.0	0.0	0.0	0.0
FAM184B	58227	symbol	M. musculus	58227	M. musculus	Fam184b	family with sequence similarity 184, member B	GO:0008150 biological_process		0.0	0.0	0.0	0.0	0.0	0.0	0.0	0.0	0.0	0.0	0.0	0.0	0.0	0.0	0.0	0.0	0.0	0.0	0.0	0.0
FAM20C	80752	symbol	M. musculus	80752	M. musculus	Fam20c	FAM20C, golgi associated secretory pathway kinase	GO:0036179 osteoclast maturation;GO:0097187 dentinogenesis;GO:0036035 osteoclast development	yes	0.0	0.0	0.0	0.0	0.0	0.0	0.0	0.0	0.0	0.0	0.0	0.0	0.0	0.0	0.0	1.0	0.0	0.0	0.0	0.0
FAM234A	106581	symbol	M. musculus	106581	M. musculus	Fam234a	family with sequence similarity 234, member A	GO:0008150 biological_process		0.0	0.0	0.0	0.0	0.0	0.0	0.0	0.0	0.0	0.0	0.0	0.0	0.0	0.0	0.0	0.0	0.0	0.0	0.0	0.0
FAM3C	27999	symbol	M. musculus	27999	M. musculus	Fam3c	FAM3 metabolism regulating signaling molecule C	GO:0007275 multicellular organism development;GO:0048856 anatomical structure development;GO:0032502 developmental process		0.0	0.0	0.0	0.0	0.0	0.0	0.0	0.0	0.0	0.0	0.0	0.0	0.0	0.0	0.0	0.0	0.0	0.0	0.0	0.0
FAM43A	224093	symbol	M. musculus	224093	M. musculus	Fam43a	family with sequence similarity 43, member A	GO:0008150 biological_process		0.0	0.0	0.0	0.0	0.0	0.0	0.0	0.0	0.0	0.0	0.0	0.0	0.0	0.0	0.0	0.0	0.0	0.0	0.0	0.0
FAM53C	66306	symbol	M. musculus	66306	M. musculus	Fam53c	family with sequence similarity 53, member C	GO:0006606 protein import into nucleus;GO:0051170 import into nucleus;GO:0034504 protein localization to nucleus		0.0	0.0	0.0	0.0	0.0	0.0	0.0	0.0	0.0	0.0	0.0	0.0	0.0	0.0	0.0	0.0	0.0	0.0	0.0	0.0
FAM98C	73833	symbol	M. musculus	73833	M. musculus	Fam98c	family with sequence similarity 98, member C	GO:0008150 biological_process		0.0	0.0	0.0	0.0	0.0	0.0	0.0	0.0	0.0	0.0	0.0	0.0	0.0	0.0	0.0	0.0	0.0	0.0	0.0	0.0
FAP	14089	symbol	M. musculus	14089	M. musculus	Fap	fibroblast activation protein	GO:1902362 melanocyte apoptotic process;GO:0010716 negative regulation of extracellular matrix disassembly;GO:0060244 negative regulation of cell proliferation involved in contact inhibition		0.0	0.0	0.0	0.0	0.0	0.0	0.0	0.0	0.0	0.0	0.0	1.0	0.0	0.0	0.0	0.0	0.0	1.0	0.0	0.0
FARS2	69955	symbol	M. musculus	69955	M. musculus	Fars2	phenylalanine-tRNA synthetase 2, mitochondrial	GO:0006432 phenylalanyl-tRNA aminoacylation;GO:0006418 tRNA aminoacylation for protein translation;GO:0043039 tRNA aminoacylation		1.0	0.0	0.0	0.0	0.0	0.0	0.0	0.0	0.0	0.0	0.0	0.0	0.0	0.0	0.0	0.0	0.0	0.0	0.0	0.0
FARSB	23874	symbol	M. musculus	23874	M. musculus	Farsb	phenylalanyl-tRNA synthetase, beta subunit	GO:0006432 phenylalanyl-tRNA aminoacylation;GO:0051290 protein heterotetramerization;GO:0051291 protein heterooligomerization		1.0	0.0	0.0	0.0	0.0	0.0	0.0	0.0	0.0	0.0	0.0	0.0	0.0	0.0	0.0	0.0	0.0	0.0	0.0	0.0
FASN	14104	symbol	M. musculus	14104	M. musculus	Fasn	fatty acid synthase	GO:0030223 neutrophil differentiation;GO:0008611 ether lipid biosynthetic process;GO:0046504 glycerol ether biosynthetic process		0.0	0.0	0.0	0.0	1.0	0.0	0.0	0.0	0.0	0.0	0.0	0.0	0.0	0.0	0.0	1.0	0.0	0.0	1.0	0.0
FBLIM1	74202	symbol	M. musculus	74202	M. musculus	Fblim1	filamin binding LIM protein 1	GO:0033623 regulation of integrin activation;GO:0008360 regulation of cell shape;GO:0022604 regulation of cell morphogenesis		0.0	0.0	0.0	0.0	0.0	0.0	0.0	0.0	0.0	0.0	0.0	0.0	0.0	0.0	0.0	0.0	0.0	0.0	0.0	0.0
FBXO9	71538	symbol	M. musculus	71538	M. musculus	Fbxo9	f-box protein 9	GO:0031146 SCF-dependent proteasomal ubiquitin-dependent protein catabolic process;GO:0070936 protein K48-linked ubiquitination;GO:0032006 regulation of TOR signaling		0.0	0.0	0.0	0.0	0.0	0.0	0.0	0.0	0.0	0.0	1.0	0.0	0.0	0.0	0.0	0.0	0.0	0.0	0.0	0.0
FBXW4	30838	symbol	M. musculus	30838	M. musculus	Fbxw4	F-box and WD-40 domain protein 4	GO:0002053 positive regulation of mesenchymal cell proliferation;GO:0010464 regulation of mesenchymal cell proliferation;GO:0031146 SCF-dependent proteasomal ubiquitin-dependent protein catabolic process		0.0	0.0	0.0	0.0	0.0	0.0	0.0	0.0	0.0	0.0	0.0	0.0	0.0	0.0	0.0	0.0	0.0	0.0	0.0	0.0
FCGR2B	14130	symbol	M. musculus	14130	M. musculus	Fcgr2b	Fc receptor, IgG, low affinity IIb	GO:0001811 negative regulation of type I hypersensitivity;GO:0002884 negative regulation of hypersensitivity;GO:0002434 immune complex clearance		0.0	1.0	0.0	0.0	1.0	1.0	1.0	0.0	1.0	0.0	0.0	0.0	0.0	0.0	0.0	1.0	0.0	1.0	0.0	0.0
FGF2	14173	symbol	M. musculus	14173	M. musculus	Fgf2	fibroblast growth factor 2	GO:0014843 growth factor dependent regulation of skeletal muscle satellite cell proliferation;GO:0021762 substantia nigra development;GO:0045609 positive regulation of inner ear auditory receptor cell differentiation		0.0	0.0	0.0	0.0	0.0	0.0	0.0	1.0	0.0	0.0	1.0	0.0	0.0	0.0	0.0	0.0	1.0	0.0	1.0	0.0
FGGY	75578	symbol	M. musculus	75578	M. musculus	Fggy	FGGY carbohydrate kinase domain containing	GO:0019321 pentose metabolic process;GO:0046835 carbohydrate phosphorylation;GO:0070050 neuron cellular homeostasis	yes	0.0	0.0	0.0	0.0	0.0	0.0	0.0	0.0	0.0	0.0	0.0	0.0	0.0	0.0	0.0	0.0	0.0	0.0	1.0	0.0
FIS1	66437	symbol	M. musculus	66437	M. musculus	Fis1	fission, mitochondrial 1	GO:1901653 cellular response to peptide;GO:0032471 negative regulation of endoplasmic reticulum calcium ion concentration;GO:0016559 peroxisome fission		0.0	0.0	0.0	0.0	0.0	0.0	0.0	0.0	0.0	0.0	0.0	1.0	0.0	0.0	1.0	0.0	0.0	0.0	0.0	0.0
FKBP5	14229	symbol	M. musculus	14229	M. musculus	Fkbp5	FK506 binding protein 5	GO:0000413 protein peptidyl-prolyl isomerization;GO:0018208 peptidyl-proline modification;GO:0061077 chaperone-mediated protein folding		0.0	0.0	0.0	0.0	0.0	0.0	0.0	0.0	0.0	1.0	0.0	0.0	0.0	0.0	0.0	0.0	0.0	0.0	0.0	0.0
FLNA	192176	symbol	M. musculus	192176	M. musculus	Flna	filamin, alpha	GO:1905000 regulation of membrane repolarization during atrial cardiac muscle cell action potential;GO:0090042 tubulin deacetylation;GO:1905031 regulation of membrane repolarization during cardiac muscle cell action potential		0.0	0.0	0.0	0.0	0.0	0.0	0.0	1.0	0.0	0.0	1.0	0.0	0.0	0.0	0.0	0.0	0.0	1.0	0.0	0.0
FLOT1	14251	symbol	M. musculus	14251	M. musculus	Flot1	flotillin 1	GO:0033227 dsRNA transport;GO:0032226 positive regulation of synaptic transmission, dopaminergic;GO:0044854 plasma membrane raft assembly		0.0	0.0	0.0	0.0	0.0	0.0	1.0	0.0	1.0	0.0	1.0	0.0	0.0	0.0	0.0	0.0	0.0	0.0	0.0	0.0
FLOT2	14252	symbol	M. musculus	14252	M. musculus	Flot2	flotillin 2	GO:1903905 positive regulation of establishment of T cell polarity;GO:0044860 protein localization to plasma membrane raft;GO:1903903 regulation of establishment of T cell polarity		0.0	0.0	0.0	0.0	0.0	0.0	0.0	0.0	0.0	0.0	0.0	0.0	0.0	0.0	0.0	0.0	0.0	0.0	0.0	0.0
FMN1	14260	symbol	M. musculus	14260	M. musculus	Fmn1	formin 1	GO:0072092 ureteric bud invasion;GO:0072093 metanephric renal vesicle formation;GO:0060677 ureteric bud elongation		0.0	0.0	0.0	0.0	0.0	0.0	0.0	0.0	0.0	0.0	0.0	0.0	0.0	0.0	0.0	0.0	0.0	0.0	0.0	0.0
FOSL2	14284	symbol	M. musculus	14284	M. musculus	Fosl2	fos-like antigen 2	GO:0071954 chemokine (C-C motif) ligand 11 production;GO:1904606 fat cell apoptotic process;GO:0060427 lung connective tissue development		0.0	0.0	0.0	0.0	1.0	1.0	0.0	0.0	0.0	0.0	1.0	0.0	0.0	0.0	0.0	1.0	0.0	0.0	0.0	0.0
FOXN2	14236	symbol	M. musculus	14236	M. musculus	Foxn2	forkhead box N2	GO:0035914 skeletal muscle cell differentiation;GO:0007519 skeletal muscle tissue development;GO:0060538 skeletal muscle organ development		0.0	0.0	0.0	0.0	0.0	0.0	0.0	0.0	0.0	0.0	0.0	0.0	0.0	0.0	0.0	0.0	0.0	0.0	0.0	0.0
FOXO3	56484	symbol	M. musculus	56484	M. musculus	Foxo3	forkhead box O3	GO:0001544 initiation of primordial ovarian follicle growth;GO:0014737 positive regulation of muscle atrophy;GO:0014735 regulation of muscle atrophy		0.0	0.0	0.0	0.0	0.0	0.0	0.0	0.0	0.0	0.0	0.0	1.0	0.0	0.0	0.0	0.0	0.0	0.0	0.0	0.0
FRMD6	319710	symbol	M. musculus	319710	M. musculus	Frmd6	FERM domain containing 6	GO:0003383 apical constriction;GO:0035332 positive regulation of hippo signaling;GO:0035330 regulation of hippo signaling		0.0	0.0	0.0	0.0	0.0	0.0	0.0	0.0	0.0	0.0	0.0	0.0	0.0	0.0	0.0	0.0	0.0	0.0	0.0	0.0
FUT4	14345	symbol	M. musculus	14345	M. musculus	Fut4	fucosyltransferase 4	GO:0106402 Lewis x epitope biosynthetic process;GO:0097022 lymphocyte migration into lymph node;GO:0097021 lymphocyte migration into lymphoid organs		0.0	0.0	0.0	1.0	1.0	0.0	0.0	1.0	0.0	0.0	0.0	0.0	0.0	0.0	0.0	0.0	0.0	0.0	1.0	0.0
FZD7	14369	symbol	M. musculus	14369	M. musculus	Fzd7	frizzled class receptor 7	GO:0042665 regulation of ectodermal cell fate specification;GO:0042666 negative regulation of ectodermal cell fate specification;GO:0014834 skeletal muscle satellite cell maintenance involved in skeletal muscle regeneration		0.0	0.0	0.0	0.0	0.0	0.0	0.0	0.0	0.0	0.0	0.0	0.0	0.0	0.0	0.0	1.0	0.0	0.0	0.0	0.0
GADD45G	23882	symbol	M. musculus	23882	M. musculus	Gadd45g	growth arrest and DNA-damage-inducible 45 gamma	GO:0045063 T-helper 1 cell differentiation;GO:0042088 T-helper 1 type immune response;GO:1900745 positive regulation of p38MAPK cascade		0.0	0.0	0.0	0.0	0.0	1.0	0.0	0.0	0.0	0.0	0.0	1.0	0.0	0.0	0.0	1.0	0.0	0.0	0.0	1.0
GAK	231580	symbol	M. musculus	231580	M. musculus	Gak	cyclin G associated kinase	GO:0035622 intrahepatic bile duct development;GO:0072318 clathrin coat disassembly;GO:1905443 regulation of clathrin coat assembly	yes	0.0	0.0	0.0	0.0	0.0	0.0	1.0	0.0	0.0	0.0	0.0	0.0	0.0	0.0	0.0	0.0	0.0	1.0	0.0	0.0
GALK1	14635	symbol	M. musculus	14635	M. musculus	Galk1	galactokinase 1	GO:0019402 galactitol metabolic process;GO:0006059 hexitol metabolic process;GO:0061623 glycolytic process from galactose	yes	0.0	0.0	0.0	0.0	0.0	0.0	0.0	0.0	0.0	0.0	0.0	0.0	0.0	0.0	0.0	0.0	0.0	0.0	1.0	0.0
GALK2	69976	symbol	M. musculus	69976	M. musculus	Galk2	galactokinase 2	GO:0006012 galactose metabolic process;GO:0046835 carbohydrate phosphorylation;GO:0019318 hexose metabolic process	yes	0.0	0.0	0.0	0.0	0.0	0.0	0.0	0.0	0.0	0.0	0.0	0.0	0.0	0.0	0.0	0.0	0.0	0.0	1.0	0.0
GALNT6	207839	symbol	M. musculus	207839	M. musculus	Galnt6	polypeptide N-acetylgalactosaminyltransferase 6	GO:0018243 protein O-linked glycosylation via threonine;GO:0018210 peptidyl-threonine modification;GO:0006493 protein O-linked glycosylation		0.0	0.0	0.0	0.0	0.0	0.0	0.0	0.0	0.0	0.0	0.0	0.0	0.0	0.0	0.0	0.0	0.0	0.0	0.0	0.0
GAS6	14456	symbol	M. musculus	14456	M. musculus	Gas6	growth arrest specific 6	GO:0071307 cellular response to vitamin K;GO:1900142 negative regulation of oligodendrocyte apoptotic process;GO:0019064 fusion of virus membrane with host plasma membrane		0.0	0.0	0.0	1.0	0.0	1.0	1.0	1.0	1.0	0.0	1.0	0.0	0.0	0.0	1.0	0.0	0.0	0.0	0.0	0.0
GAS7	14457	symbol	M. musculus	14457	M. musculus	Gas7	growth arrest specific 7	GO:0030041 actin filament polymerization;GO:0008154 actin polymerization or depolymerization;GO:0051017 actin filament bundle assembly		0.0	0.0	0.0	0.0	0.0	0.0	0.0	0.0	0.0	0.0	0.0	0.0	0.0	0.0	0.0	0.0	0.0	0.0	0.0	0.0
GDAP2	14547	symbol	M. musculus	14547	M. musculus	Gdap2	ganglioside-induced differentiation-associated-protein 2	GO:0032526 response to retinoic acid;GO:0033993 response to lipid;GO:1901700 response to oxygen-containing compound		0.0	0.0	0.0	0.0	0.0	0.0	0.0	0.0	0.0	0.0	0.0	0.0	0.0	0.0	0.0	0.0	0.0	0.0	0.0	0.0
GDF3	14562	symbol	M. musculus	14562	M. musculus	Gdf3	growth differentiation factor 3	GO:0048859 formation of anatomical boundary;GO:0090009 primitive streak formation;GO:0032525 somite rostral/caudal axis specification		0.0	0.0	0.0	0.0	0.0	0.0	0.0	0.0	0.0	0.0	0.0	0.0	0.0	0.0	0.0	0.0	0.0	0.0	0.0	0.0
GDPD5	233552	symbol	M. musculus	233552	M. musculus	Gdpd5	glycerophosphodiester phosphodiesterase domain containing 5	GO:0048505 regulation of timing of cell differentiation;GO:0040034 regulation of development, heterochronic;GO:0021895 cerebral cortex neuron differentiation		0.0	0.0	0.0	0.0	0.0	0.0	0.0	0.0	0.0	0.0	0.0	0.0	0.0	0.0	0.0	0.0	0.0	0.0	0.0	0.0
GLIPR1	73690	symbol	M. musculus	73690	M. musculus	Glipr1	GLI pathogenesis related 1			0.0	1.0	0.0	0.0	0.0	0.0	0.0	0.0	0.0	0.0	0.0	0.0	0.0	0.0	0.0	0.0	0.0	0.0	0.0	0.0
GLMP	56700	symbol	M. musculus	56700	M. musculus	Glmp	glycosylated lysosomal membrane protein	GO:0061462 protein localization to lysosome;GO:0072665 protein localization to vacuole;GO:0050821 protein stabilization		0.0	0.0	0.0	0.0	0.0	0.0	0.0	0.0	0.0	0.0	0.0	0.0	0.0	0.0	0.0	0.0	0.0	0.0	0.0	0.0
GLTP	56356	symbol	M. musculus	56356	M. musculus	Gltp	glycolipid transfer protein	GO:0120009 intermembrane lipid transfer;GO:0035627 ceramide transport;GO:0042886 amide transport		0.0	0.0	1.0	0.0	0.0	0.0	0.0	0.0	0.0	0.0	0.0	0.0	0.0	1.0	0.0	0.0	0.0	0.0	0.0	0.0
GM2A	14667	symbol	M. musculus	14667	M. musculus	Gm2a	GM2 ganglioside activator protein	GO:0006689 ganglioside catabolic process;GO:0046479 glycosphingolipid catabolic process;GO:0019377 glycolipid catabolic process		0.0	1.0	0.0	0.0	0.0	0.0	0.0	0.0	0.0	0.0	0.0	0.0	1.0	1.0	0.0	0.0	0.0	0.0	1.0	0.0
GMFG	63986	symbol	M. musculus	63986	M. musculus	Gmfg	glia maturation factor, gamma	GO:0071846 actin filament debranching;GO:0034316 negative regulation of Arp2/3 complex-mediated actin nucleation;GO:0051126 negative regulation of actin nucleation		0.0	1.0	0.0	0.0	0.0	0.0	0.0	0.0	0.0	0.0	0.0	0.0	0.0	0.0	0.0	0.0	0.0	1.0	0.0	0.0
GNB2	14693	symbol	M. musculus	14693	M. musculus	Gnb2	guanine nucleotide binding protein (G protein), beta 2	GO:1901379 regulation of potassium ion transmembrane transport;GO:0043266 regulation of potassium ion transport;GO:1904062 regulation of monoatomic cation transmembrane transport		0.0	0.0	1.0	0.0	0.0	0.0	0.0	0.0	0.0	0.0	0.0	0.0	0.0	0.0	0.0	0.0	0.0	0.0	0.0	0.0
GOT2	14719	symbol	M. musculus	14719	M. musculus	Got2	glutamatic-oxaloacetic transaminase 2, mitochondrial	GO:0019550 glutamate catabolic process to aspartate;GO:0019551 glutamate catabolic process to 2-oxoglutarate;GO:0006532 aspartate biosynthetic process		0.0	0.0	0.0	0.0	0.0	0.0	0.0	0.0	0.0	0.0	0.0	0.0	0.0	1.0	0.0	0.0	0.0	0.0	0.0	0.0
GPD2	14571	symbol	M. musculus	14571	M. musculus	Gpd2	glycerol phosphate dehydrogenase 2, mitochondrial	GO:0006072 glycerol-3-phosphate metabolic process;GO:0052646 alditol phosphate metabolic process;GO:0006734 NADH metabolic process		0.0	0.0	0.0	0.0	0.0	0.0	0.0	0.0	0.0	0.0	0.0	0.0	0.0	0.0	0.0	0.0	0.0	0.0	1.0	0.0
GPI	14751	gene_synonym	M. musculus	14751	M. musculus	Gpi1	glucose-6-phosphate isomerase 1	GO:0141199 GDP-mannose biosynthetic process from glucose;GO:0009298 GDP-mannose biosynthetic process;GO:0019673 GDP-mannose metabolic process		0.0	1.0	0.0	0.0	0.0	0.0	0.0	1.0	0.0	0.0	0.0	0.0	0.0	0.0	0.0	0.0	0.0	0.0	1.0	0.0
GPR171	229323	symbol	M. musculus	229323	M. musculus	Gpr171	G protein-coupled receptor 171	GO:0051930 regulation of sensory perception of pain;GO:0051931 regulation of sensory perception;GO:0060259 regulation of feeding behavior		0.0	0.0	0.0	0.0	0.0	0.0	0.0	0.0	0.0	0.0	0.0	0.0	0.0	0.0	0.0	0.0	0.0	0.0	0.0	0.0
GPR35	64095	symbol	M. musculus	64095	M. musculus	Gpr35	G protein-coupled receptor 35	GO:1904456 negative regulation of neuronal action potential;GO:0051970 negative regulation of transmission of nerve impulse;GO:0045759 negative regulation of action potential		0.0	0.0	0.0	1.0	0.0	0.0	0.0	0.0	0.0	0.0	0.0	0.0	0.0	0.0	0.0	0.0	0.0	0.0	0.0	0.0
GRAMD1B	235283	symbol	M. musculus	235283	M. musculus	Gramd1b	GRAM domain containing 1B	GO:0071397 cellular response to cholesterol;GO:0036315 cellular response to sterol;GO:0070723 response to cholesterol		0.0	0.0	0.0	0.0	0.0	0.0	0.0	0.0	0.0	0.0	0.0	0.0	0.0	1.0	0.0	0.0	0.0	0.0	0.0	0.0
GRK6	26385	symbol	M. musculus	26385	M. musculus	Grk6	G protein-coupled receptor kinase 6	GO:0002029 desensitization of G protein-coupled receptor signaling pathway;GO:0022401 negative adaptation of signaling pathway;GO:0023058 adaptation of signaling pathway	yes	0.0	0.0	0.0	0.0	0.0	0.0	0.0	0.0	0.0	0.0	0.0	0.0	0.0	0.0	0.0	0.0	0.0	0.0	0.0	0.0
GSN	227753	symbol	M. musculus	227753	M. musculus	Gsn	gelsolin	GO:1903906 regulation of plasma membrane raft polarization;GO:1903921 regulation of protein processing in phagocytic vesicle;GO:1903923 positive regulation of protein processing in phagocytic vesicle		0.0	1.0	0.0	0.0	0.0	0.0	1.0	0.0	0.0	0.0	1.0	1.0	0.0	0.0	1.0	0.0	0.0	1.0	0.0	1.0
GSTO1	14873	symbol	M. musculus	14873	M. musculus	Gsto1	glutathione S-transferase omega 1	GO:0019853 L-ascorbic acid biosynthetic process;GO:1901336 lactone biosynthetic process;GO:0060315 negative regulation of ryanodine-sensitive calcium-release channel activity		0.0	0.0	0.0	0.0	0.0	0.0	0.0	0.0	0.0	0.0	0.0	0.0	0.0	0.0	0.0	0.0	0.0	0.0	1.0	0.0
GUSB	110006	symbol	M. musculus	110006	M. musculus	Gusb	glucuronidase, beta	GO:0019391 glucuronoside catabolic process;GO:0019389 glucuronoside metabolic process;GO:0030207 chondroitin sulfate catabolic process		0.0	1.0	0.0	0.0	0.0	0.0	0.0	0.0	0.0	0.0	0.0	0.0	1.0	0.0	0.0	0.0	0.0	0.0	1.0	0.0
HAUS3	231123	symbol	M. musculus	231123	M. musculus	Haus3	HAUS augmin-like complex, subunit 3	GO:0007098 centrosome cycle;GO:0051225 spindle assembly;GO:0031023 microtubule organizing center organization		0.0	0.0	0.0	0.0	0.0	0.0	0.0	0.0	0.0	0.0	0.0	0.0	0.0	0.0	0.0	0.0	0.0	0.0	0.0	0.0
HAUS4	219072	symbol	M. musculus	219072	M. musculus	Haus4	HAUS augmin-like complex, subunit 4	GO:0007098 centrosome cycle;GO:0051225 spindle assembly;GO:0031023 microtubule organizing center organization		0.0	0.0	0.0	0.0	0.0	0.0	0.0	0.0	0.0	0.0	0.0	0.0	0.0	0.0	0.0	0.0	0.0	0.0	0.0	0.0
HCAR2	80885	symbol	M. musculus	80885	M. musculus	Hcar2	hydroxycarboxylic acid receptor 2	GO:0070165 positive regulation of adiponectin secretion;GO:0070163 regulation of adiponectin secretion;GO:0050995 negative regulation of lipid catabolic process		0.0	0.0	0.0	0.0	0.0	0.0	0.0	0.0	0.0	0.0	0.0	0.0	0.0	0.0	0.0	0.0	0.0	0.0	0.0	0.0
HDAC4	208727	symbol	M. musculus	208727	M. musculus	Hdac4	histone deacetylase 4	GO:1902437 positive regulation of male mating behavior;GO:1902435 regulation of male mating behavior;GO:0014854 response to inactivity		0.0	0.0	0.0	0.0	0.0	0.0	0.0	1.0	0.0	0.0	1.0	1.0	0.0	0.0	0.0	0.0	1.0	0.0	0.0	0.0
HDAC6	15185	symbol	M. musculus	15185	M. musculus	Hdac6	histone deacetylase 6	GO:0070843 misfolded protein transport;GO:0070844 polyubiquitinated protein transport;GO:0070845 polyubiquitinated misfolded protein transport		0.0	0.0	0.0	0.0	0.0	0.0	0.0	1.0	0.0	1.0	0.0	0.0	0.0	0.0	1.0	0.0	0.0	1.0	0.0	0.0
HDAC9	79221	symbol	M. musculus	79221	M. musculus	Hdac9	histone deacetylase 9	GO:0034983 peptidyl-lysine deacetylation;GO:1902809 regulation of skeletal muscle fiber differentiation;GO:0045843 negative regulation of striated muscle tissue development		0.0	0.0	0.0	0.0	1.0	0.0	0.0	1.0	0.0	0.0	0.0	0.0	0.0	0.0	0.0	1.0	0.0	0.0	0.0	0.0
HDGF	15191	symbol	M. musculus	15191	M. musculus	Hdgf	heparin binding growth factor	GO:0098761 cellular response to interleukin-7;GO:0098760 response to interleukin-7;GO:0034504 protein localization to nucleus		0.0	0.0	0.0	0.0	0.0	0.0	0.0	0.0	0.0	0.0	0.0	0.0	0.0	0.0	0.0	0.0	0.0	0.0	0.0	0.0
HECTD3	76608	symbol	M. musculus	76608	M. musculus	Hectd3	HECT domain E3 ubiquitin protein ligase 3	GO:0043161 proteasome-mediated ubiquitin-dependent protein catabolic process;GO:0010498 proteasomal protein catabolic process;GO:0006511 ubiquitin-dependent protein catabolic process		0.0	0.0	0.0	0.0	0.0	0.0	0.0	0.0	0.0	0.0	0.0	0.0	0.0	0.0	0.0	0.0	0.0	0.0	0.0	0.0
HELB	117599	symbol	M. musculus	117599	M. musculus	Helb	helicase (DNA) B	GO:1903775 regulation of DNA double-strand break processing;GO:0006269 DNA replication, synthesis of primer;GO:2000042 negative regulation of double-strand break repair via homologous recombination		0.0	0.0	0.0	0.0	0.0	0.0	0.0	0.0	0.0	0.0	0.0	0.0	0.0	0.0	0.0	0.0	0.0	0.0	0.0	0.0
HERPUD1	64209	symbol	M. musculus	64209	M. musculus	Herpud1	homocysteine-inducible, endoplasmic reticulum stress-inducible, ubiquitin-like domain member 1	GO:0030970 retrograde protein transport, ER to cytosol;GO:1903513 endoplasmic reticulum to cytosol transport;GO:1902236 negative regulation of endoplasmic reticulum stress-induced intrinsic apoptotic signaling pathway		0.0	0.0	0.0	0.0	0.0	0.0	0.0	0.0	0.0	0.0	0.0	0.0	0.0	0.0	1.0	0.0	0.0	0.0	0.0	0.0
HFE	15216	symbol	M. musculus	15216	M. musculus	Hfe	homeostatic iron regulator	GO:1904282 regulation of antigen processing and presentation of endogenous peptide antigen via MHC class I;GO:1904283 negative regulation of antigen processing and presentation of endogenous peptide antigen via MHC class I;GO:0002590 negative regulation of antigen processing and presentation of peptide antigen via MHC class I		0.0	0.0	1.0	0.0	0.0	0.0	0.0	0.0	0.0	0.0	1.0	0.0	0.0	0.0	1.0	0.0	0.0	0.0	0.0	0.0
HGF	15234	symbol	M. musculus	15234	M. musculus	Hgf	hepatocyte growth factor	GO:0060665 regulation of branching involved in salivary gland morphogenesis by mesenchymal-epithelial signaling;GO:1902947 regulation of tau-protein kinase activity;GO:0048012 hepatocyte growth factor receptor signaling pathway		0.0	0.0	0.0	1.0	0.0	0.0	0.0	1.0	1.0	0.0	0.0	0.0	0.0	0.0	0.0	0.0	0.0	1.0	0.0	1.0
HIP1	215114	symbol	M. musculus	215114	M. musculus	Hip1	huntingtin interacting protein 1	GO:2000588 positive regulation of platelet-derived growth factor receptor-beta signaling pathway;GO:0010641 positive regulation of platelet-derived growth factor receptor signaling pathway;GO:2000586 regulation of platelet-derived growth factor receptor-beta signaling pathway		0.0	0.0	0.0	0.0	0.0	0.0	1.0	0.0	0.0	0.0	0.0	1.0	0.0	0.0	1.0	0.0	0.0	0.0	0.0	0.0
HIVEP2	15273	symbol	M. musculus	15273	M. musculus	Hivep2	human immunodeficiency virus type I enhancer binding protein 2	GO:0006351 DNA-templated transcription;GO:0045944 positive regulation of transcription by RNA polymerase II;GO:0032774 RNA biosynthetic process		0.0	0.0	0.0	0.0	0.0	0.0	0.0	0.0	0.0	0.0	0.0	0.0	0.0	0.0	0.0	0.0	0.0	0.0	0.0	0.0
HLA-DMB						None	None	None	None	nan	nan	nan	nan	nan	nan	nan	nan	nan	nan	nan	nan	nan	nan	nan	nan	nan	nan	nan	nan
HLX	15284	symbol	M. musculus	15284	M. musculus	Hlx	H2.0-like homeobox	GO:0045629 negative regulation of T-helper 2 cell differentiation;GO:0045627 positive regulation of T-helper 1 cell differentiation;GO:0045064 T-helper 2 cell differentiation		0.0	0.0	0.0	0.0	0.0	0.0	0.0	0.0	0.0	0.0	1.0	0.0	0.0	0.0	0.0	1.0	0.0	0.0	0.0	0.0
HMGCL	15356	symbol	M. musculus	15356	M. musculus	Hmgcl	3-hydroxy-3-methylglutaryl-Coenzyme A lyase	GO:0046951 ketone body biosynthetic process;GO:0006552 L-leucine catabolic process;GO:0009080 pyruvate family amino acid catabolic process		0.0	0.0	0.0	0.0	0.0	0.0	0.0	0.0	0.0	0.0	0.0	0.0	0.0	0.0	0.0	0.0	0.0	0.0	1.0	0.0
HMOX1	15368	symbol	M. musculus	15368	M. musculus	Hmox1	heme oxygenase 1	GO:0006788 heme oxidation;GO:1904550 response to arachidonic acid;GO:0032764 negative regulation of mast cell cytokine production		0.0	0.0	1.0	0.0	1.0	0.0	0.0	1.0	0.0	1.0	0.0	1.0	0.0	0.0	0.0	0.0	1.0	0.0	0.0	0.0
HPGD	15446	symbol	M. musculus	15446	M. musculus	Hpgd	hydroxyprostaglandin dehydrogenase 15 (NAD)	GO:1905828 regulation of prostaglandin catabolic process;GO:0097070 ductus arteriosus closure;GO:0007567 parturition		0.0	0.0	0.0	0.0	0.0	0.0	0.0	0.0	0.0	0.0	0.0	1.0	0.0	0.0	0.0	0.0	0.0	0.0	0.0	0.0
HPS5	246694	symbol	M. musculus	246694	M. musculus	Hps5	HPS5, biogenesis of lysosomal organelles complex 2 subunit 2	GO:1903232 melanosome assembly;GO:0060155 platelet dense granule organization;GO:0032438 melanosome organization		0.0	0.0	0.0	0.0	0.0	0.0	0.0	0.0	0.0	0.0	0.0	0.0	0.0	0.0	0.0	0.0	0.0	0.0	0.0	0.0
HSPA1B	15511	symbol	M. musculus	15511	M. musculus	Hspa1b	heat shock protein 1B	GO:0042026 protein refolding;GO:0051085 chaperone cofactor-dependent protein refolding;GO:0051084 'de novo' post-translational protein folding		1.0	1.0	0.0	0.0	0.0	0.0	0.0	0.0	0.0	1.0	0.0	0.0	0.0	0.0	1.0	0.0	0.0	0.0	0.0	0.0
HSPA4L	18415	symbol	M. musculus	18415	M. musculus	Hspa4l	heat shock protein 4 like	GO:0006457 protein folding;GO:0051604 protein maturation;GO:0010467 gene expression		0.0	0.0	0.0	0.0	0.0	0.0	0.0	0.0	0.0	1.0	0.0	0.0	0.0	0.0	0.0	0.0	0.0	0.0	0.0	0.0
HTATIP2	53415	symbol	M. musculus	53415	M. musculus	Htatip2	HIV-1 Tat interactive protein 2	GO:0051170 import into nucleus;GO:0046777 protein autophosphorylation;GO:0006913 nucleocytoplasmic transport		0.0	0.0	0.0	0.0	0.0	0.0	0.0	0.0	0.0	0.0	0.0	1.0	0.0	0.0	0.0	0.0	0.0	0.0	0.0	0.0
HTRA3	78558	symbol	M. musculus	78558	M. musculus	Htra3	HtrA serine peptidase 3	GO:0030514 negative regulation of BMP signaling pathway;GO:0030512 negative regulation of transforming growth factor beta receptor signaling pathway;GO:0030510 regulation of BMP signaling pathway		0.0	0.0	0.0	0.0	0.0	0.0	0.0	0.0	0.0	0.0	0.0	0.0	0.0	0.0	0.0	0.0	0.0	0.0	0.0	0.0
IAH1	67732	symbol	M. musculus	67732	M. musculus	Iah1	isoamyl acetate-hydrolyzing esterase 1 homolog	GO:0016042 lipid catabolic process;GO:0006629 lipid metabolic process;GO:0009056 catabolic process		0.0	0.0	0.0	0.0	0.0	0.0	0.0	0.0	0.0	0.0	0.0	0.0	0.0	0.0	0.0	0.0	0.0	0.0	0.0	0.0
ICOSLG	50723	gene_synonym	M. musculus	50723	M. musculus	Icosl	icos ligand	GO:0032753 positive regulation of interleukin-4 production;GO:0042104 positive regulation of activated T cell proliferation;GO:0002204 somatic recombination of immunoglobulin genes involved in immune response		0.0	0.0	0.0	0.0	0.0	1.0	0.0	0.0	1.0	0.0	1.0	0.0	0.0	0.0	0.0	1.0	0.0	0.0	0.0	0.0
ID2	15902	symbol	M. musculus	15902	M. musculus	Id2	inhibitor of DNA binding 2	GO:1904797 negative regulation of core promoter binding;GO:0001966 thigmotaxis;GO:0061030 epithelial cell differentiation involved in mammary gland alveolus development		0.0	0.0	0.0	0.0	0.0	0.0	0.0	0.0	0.0	0.0	0.0	0.0	0.0	0.0	0.0	1.0	0.0	0.0	0.0	0.0
IER2	15936	symbol	M. musculus	15936	M. musculus	Ier2	immediate early response 2	GO:0071774 response to fibroblast growth factor;GO:0070848 response to growth factor;GO:0048870 cell motility		0.0	0.0	0.0	0.0	0.0	0.0	0.0	0.0	0.0	0.0	0.0	0.0	0.0	0.0	0.0	0.0	0.0	0.0	0.0	0.0
IFNAR1	15975	symbol	M. musculus	15975	M. musculus	Ifnar1	interferon (alpha and beta) receptor 1	GO:0032606 type I interferon production;GO:0035457 cellular response to interferon-alpha;GO:1901857 positive regulation of cellular respiration		1.0	0.0	0.0	0.0	0.0	1.0	0.0	0.0	1.0	0.0	1.0	0.0	0.0	0.0	0.0	1.0	0.0	0.0	0.0	0.0
IGSF8	140559	symbol	M. musculus	140559	M. musculus	Igsf8	immunoglobulin superfamily, member 8	GO:0050804 modulation of chemical synaptic transmission;GO:0099177 regulation of trans-synaptic signaling;GO:2000145 regulation of cell motility		0.0	0.0	0.0	0.0	0.0	0.0	0.0	0.0	0.0	0.0	0.0	0.0	0.0	0.0	0.0	0.0	0.0	0.0	0.0	0.0
IKZF3	22780	symbol	M. musculus	22780	M. musculus	Ikzf3	IKAROS family zinc finger 3	GO:0045577 regulation of B cell differentiation;GO:0030888 regulation of B cell proliferation;GO:0050864 regulation of B cell activation		0.0	0.0	0.0	0.0	0.0	0.0	0.0	0.0	0.0	0.0	0.0	0.0	0.0	0.0	0.0	1.0	0.0	0.0	0.0	0.0
IL10RB	16155	symbol	M. musculus	16155	M. musculus	Il10rb	interleukin 10 receptor, beta	GO:1901857 positive regulation of cellular respiration;GO:0043457 regulation of cellular respiration;GO:0046427 positive regulation of receptor signaling pathway via JAK-STAT		0.0	0.0	0.0	0.0	0.0	0.0	0.0	0.0	1.0	0.0	0.0	0.0	0.0	0.0	0.0	0.0	0.0	0.0	0.0	0.0
IL13RA1	16164	symbol	M. musculus	16164	M. musculus	Il13ra1	interleukin 13 receptor, alpha 1	GO:0019221 cytokine-mediated signaling pathway;GO:0071345 cellular response to cytokine stimulus;GO:0034097 response to cytokine		0.0	0.0	0.0	0.0	0.0	0.0	0.0	0.0	0.0	0.0	0.0	0.0	0.0	0.0	0.0	0.0	0.0	0.0	0.0	0.0
IL18BP	16068	symbol	M. musculus	16068	M. musculus	Il18bp	interleukin 18 binding protein	GO:0042088 T-helper 1 type immune response;GO:0002460 adaptive immune response based on somatic recombination of immune receptors built from immunoglobulin superfamily domains;GO:0002250 adaptive immune response		0.0	0.0	0.0	0.0	0.0	0.0	0.0	0.0	0.0	0.0	0.0	0.0	0.0	0.0	0.0	1.0	0.0	0.0	0.0	0.0
IL1B	16176	symbol	M. musculus	16176	M. musculus	Il1b	interleukin 1 beta	GO:0035504 regulation of myosin light chain kinase activity;GO:0035505 positive regulation of myosin light chain kinase activity;GO:1903597 negative regulation of gap junction assembly		1.0	0.0	0.0	1.0	1.0	1.0	0.0	1.0	1.0	0.0	1.0	1.0	0.0	1.0	1.0	0.0	1.0	1.0	0.0	1.0
IL1R1	16177	symbol	M. musculus	16177	M. musculus	Il1r1	interleukin 1 receptor, type I	GO:2000661 positive regulation of interleukin-1-mediated signaling pathway;GO:0010286 heat acclimation;GO:2000659 regulation of interleukin-1-mediated signaling pathway		0.0	0.0	0.0	0.0	1.0	0.0	0.0	1.0	1.0	0.0	1.0	0.0	0.0	0.0	0.0	0.0	0.0	0.0	0.0	0.0
IL1RN	16181	symbol	M. musculus	16181	M. musculus	Il1rn	interleukin 1 receptor antagonist	GO:2000660 negative regulation of interleukin-1-mediated signaling pathway;GO:0001660 fever generation;GO:2000659 regulation of interleukin-1-mediated signaling pathway		0.0	0.0	0.0	0.0	1.0	0.0	0.0	0.0	0.0	0.0	0.0	0.0	0.0	0.0	0.0	0.0	0.0	0.0	0.0	0.0
IL4R	16190	gene_synonym	M. musculus	16190	M. musculus	Il4ra	interleukin 4 receptor, alpha	GO:0045626 negative regulation of T-helper 1 cell differentiation;GO:0035771 interleukin-4-mediated signaling pathway;GO:0002826 negative regulation of T-helper 1 type immune response		0.0	0.0	0.0	0.0	1.0	0.0	0.0	0.0	1.0	0.0	1.0	0.0	0.0	0.0	0.0	1.0	0.0	0.0	0.0	0.0
INO80E	233875	symbol	M. musculus	233875	M. musculus	Ino80e	INO80 complex subunit E	GO:1904507 positive regulation of telomere maintenance in response to DNA damage;GO:0060382 regulation of DNA strand elongation;GO:1904505 regulation of telomere maintenance in response to DNA damage		0.0	0.0	0.0	0.0	0.0	0.0	0.0	0.0	0.0	0.0	0.0	0.0	0.0	0.0	0.0	0.0	0.0	0.0	0.0	0.0
INPP1	16329	symbol	M. musculus	16329	M. musculus	Inpp1	inositol polyphosphate-1-phosphatase	GO:0046854 phosphatidylinositol phosphate biosynthetic process;GO:0006661 phosphatidylinositol biosynthetic process;GO:0046488 phosphatidylinositol metabolic process		0.0	0.0	0.0	0.0	0.0	0.0	0.0	0.0	0.0	0.0	0.0	0.0	0.0	0.0	0.0	0.0	0.0	0.0	0.0	0.0
INPP4A	269180	symbol	M. musculus	269180	M. musculus	Inpp4a	inositol polyphosphate-4-phosphatase, type I	GO:0006797 polyphosphate metabolic process;GO:0006798 polyphosphate catabolic process;GO:0099072 regulation of postsynaptic membrane neurotransmitter receptor levels		0.0	0.0	0.0	0.0	0.0	0.0	0.0	0.0	0.0	0.0	0.0	0.0	0.0	0.0	0.0	0.0	0.0	0.0	0.0	0.0
INPP5K	19062	symbol	M. musculus	19062	M. musculus	Inpp5k	inositol polyphosphate 5-phosphatase K	GO:2000466 negative regulation of glycogen (starch) synthase activity;GO:2001151 regulation of renal water transport;GO:2001153 positive regulation of renal water transport		0.0	0.0	0.0	0.0	0.0	0.0	0.0	0.0	0.0	0.0	0.0	0.0	0.0	0.0	0.0	0.0	0.0	1.0	0.0	0.0
INTS5	109077	symbol	M. musculus	109077	M. musculus	Ints5	integrator complex subunit 5	GO:0034472 snRNA 3'-end processing;GO:0016180 snRNA processing;GO:0016073 snRNA metabolic process		0.0	0.0	0.0	0.0	0.0	0.0	0.0	0.0	0.0	0.0	0.0	0.0	0.0	0.0	0.0	0.0	0.0	0.0	0.0	0.0
INTS7	77065	symbol	M. musculus	77065	M. musculus	Ints7	integrator complex subunit 7	GO:0034472 snRNA 3'-end processing;GO:0016180 snRNA processing;GO:0016073 snRNA metabolic process		0.0	0.0	0.0	0.0	0.0	0.0	0.0	0.0	0.0	0.0	0.0	0.0	0.0	0.0	0.0	0.0	0.0	0.0	0.0	0.0
IPO4	75751	symbol	M. musculus	75751	M. musculus	Ipo4	importin 4	GO:0006606 protein import into nucleus;GO:0051170 import into nucleus;GO:0034504 protein localization to nucleus		1.0	0.0	0.0	0.0	0.0	0.0	0.0	0.0	0.0	0.0	0.0	0.0	0.0	0.0	0.0	0.0	0.0	0.0	0.0	0.0
IRAK3	73914	symbol	M. musculus	73914	M. musculus	Irak3	interleukin-1 receptor-associated kinase 3	GO:0010932 regulation of macrophage tolerance induction;GO:0010933 positive regulation of macrophage tolerance induction;GO:0008063 Toll signaling pathway	yes	0.0	0.0	0.0	0.0	0.0	0.0	0.0	0.0	1.0	0.0	1.0	0.0	0.0	0.0	0.0	0.0	0.0	1.0	0.0	0.0
IRF1	16362	symbol	M. musculus	16362	M. musculus	Irf1	interferon regulatory factor 1	GO:0034124 regulation of MyD88-dependent toll-like receptor signaling pathway;GO:0045590 negative regulation of regulatory T cell differentiation;GO:0045629 negative regulation of T-helper 2 cell differentiation		0.0	0.0	0.0	0.0	0.0	0.0	0.0	0.0	1.0	0.0	1.0	1.0	0.0	0.0	0.0	1.0	1.0	0.0	0.0	0.0
IRF7	54123	symbol	M. musculus	54123	M. musculus	Irf7	interferon regulatory factor 7	GO:0034127 regulation of MyD88-independent toll-like receptor signaling pathway;GO:0034124 regulation of MyD88-dependent toll-like receptor signaling pathway;GO:0032606 type I interferon production		0.0	0.0	0.0	0.0	0.0	1.0	0.0	0.0	1.0	0.0	1.0	0.0	0.0	0.0	0.0	1.0	0.0	0.0	0.0	0.0
IRS2	384783	symbol	M. musculus	384783	M. musculus	Irs2	insulin receptor substrate 2	GO:0010748 negative regulation of long-chain fatty acid import across plasma membrane;GO:0140213 negative regulation of long-chain fatty acid import into cell;GO:1904692 positive regulation of type B pancreatic cell proliferation		0.0	0.0	0.0	0.0	0.0	0.0	0.0	1.0	0.0	0.0	0.0	0.0	0.0	0.0	0.0	0.0	0.0	0.0	0.0	0.0
ITGA6	16403	symbol	M. musculus	16403	M. musculus	Itga6	integrin alpha 6	GO:0097534 lymphoid lineage cell migration;GO:0035878 nail development;GO:0043589 skin morphogenesis		0.0	0.0	0.0	1.0	0.0	0.0	0.0	1.0	0.0	0.0	0.0	1.0	0.0	0.0	0.0	0.0	0.0	0.0	0.0	0.0
ITGA8	241226	symbol	M. musculus	241226	M. musculus	Itga8	integrin alpha 8	GO:0048745 smooth muscle tissue development;GO:0030511 positive regulation of transforming growth factor beta receptor signaling pathway;GO:1903846 positive regulation of cellular response to transforming growth factor beta stimulus		0.0	0.0	0.0	0.0	0.0	0.0	0.0	0.0	0.0	0.0	0.0	0.0	0.0	0.0	0.0	0.0	0.0	0.0	0.0	0.0
ITGAL	16408	symbol	M. musculus	16408	M. musculus	Itgal	integrin alpha L	GO:0035683 memory T cell extravasation;GO:0002291 T cell activation via T cell receptor contact with antigen bound to MHC molecule on antigen presenting cell;GO:0072683 T cell extravasation		0.0	1.0	0.0	1.0	0.0	0.0	1.0	0.0	0.0	0.0	0.0	0.0	0.0	0.0	0.0	1.0	1.0	0.0	0.0	0.0
ITPRIP	414801	symbol	M. musculus	414801	M. musculus	Itprip	inositol 1,4,5-triphosphate receptor interacting protein	GO:1902042 negative regulation of extrinsic apoptotic signaling pathway via death domain receptors;GO:0008625 extrinsic apoptotic signaling pathway via death domain receptors;GO:1902041 regulation of extrinsic apoptotic signaling pathway via death domain receptors		0.0	0.0	0.0	0.0	0.0	0.0	0.0	0.0	0.0	0.0	0.0	1.0	0.0	0.0	0.0	0.0	0.0	0.0	0.0	0.0
ITSN1	16443	symbol	M. musculus	16443	M. musculus	Itsn1	intersectin 1 (SH3 domain protein 1A)	GO:0150007 clathrin-dependent synaptic vesicle endocytosis;GO:2001288 positive regulation of caveolin-mediated endocytosis;GO:2001286 regulation of caveolin-mediated endocytosis		0.0	0.0	0.0	0.0	0.0	0.0	1.0	0.0	0.0	0.0	0.0	0.0	0.0	0.0	0.0	0.0	1.0	0.0	0.0	0.0
IVD	56357	symbol	M. musculus	56357	M. musculus	Ivd	isovaleryl coenzyme A dehydrogenase	GO:0006552 L-leucine catabolic process;GO:0009080 pyruvate family amino acid catabolic process;GO:0006551 L-leucine metabolic process		0.0	0.0	0.0	0.0	0.0	0.0	0.0	0.0	0.0	0.0	0.0	0.0	0.0	0.0	0.0	0.0	0.0	0.0	0.0	0.0
JAG1	16449	symbol	M. musculus	16449	M. musculus	Jag1	jagged 1	GO:0061444 endocardial cushion cell development;GO:0061443 endocardial cushion cell differentiation;GO:0061073 ciliary body morphogenesis		0.0	0.0	0.0	0.0	0.0	0.0	0.0	0.0	0.0	0.0	0.0	0.0	0.0	0.0	0.0	1.0	0.0	0.0	0.0	0.0
JDP2	81703	symbol	M. musculus	81703	M. musculus	Jdp2	Jun dimerization protein 2	GO:0045599 negative regulation of fat cell differentiation;GO:0045598 regulation of fat cell differentiation;GO:0045444 fat cell differentiation		0.0	0.0	0.0	0.0	0.0	0.0	0.0	0.0	0.0	0.0	0.0	0.0	0.0	0.0	0.0	0.0	0.0	0.0	0.0	0.0
JMJD6	107817	symbol	M. musculus	107817	M. musculus	Jmjd6	jumonji domain containing 6	GO:0018395 peptidyl-lysine hydroxylation to 5-hydroxy-L-lysine;GO:0032460 negative regulation of protein oligomerization;GO:0032463 negative regulation of protein homooligomerization		0.0	0.0	0.0	0.0	0.0	0.0	1.0	0.0	0.0	0.0	0.0	0.0	0.0	0.0	0.0	1.0	0.0	1.0	0.0	0.0
JPT2	52009	symbol	M. musculus	52009	M. musculus	Jpt2	Jupiter microtubule associated homolog 2	GO:0075509 endocytosis involved in viral entry into host cell;GO:0046794 transport of virus;GO:0044409 symbiont entry into host		0.0	0.0	0.0	0.0	0.0	0.0	1.0	0.0	0.0	0.0	0.0	0.0	0.0	0.0	0.0	0.0	0.0	0.0	0.0	0.0
KANK2	235041	symbol	M. musculus	235041	M. musculus	Kank2	KN motif and ankyrin repeat domains 2	GO:0070563 negative regulation of vitamin D receptor signaling pathway;GO:0090521 podocyte cell migration;GO:0070562 regulation of vitamin D receptor signaling pathway		0.0	0.0	0.0	0.0	0.0	0.0	0.0	0.0	0.0	0.0	0.0	0.0	0.0	0.0	0.0	0.0	0.0	1.0	0.0	0.0
KBTBD11	74901	symbol	M. musculus	74901	M. musculus	Kbtbd11	kelch repeat and BTB (POZ) domain containing 11	GO:0008150 biological_process		0.0	0.0	0.0	0.0	0.0	0.0	0.0	0.0	0.0	0.0	0.0	0.0	0.0	0.0	0.0	0.0	0.0	0.0	0.0	0.0
KCNJ10	16513	symbol	M. musculus	16513	M. musculus	Kcnj10	potassium inwardly-rectifying channel, subfamily J, member 10	GO:0051933 amino acid neurotransmitter reuptake;GO:0051935 glutamate reuptake;GO:0060075 regulation of resting membrane potential		0.0	0.0	0.0	0.0	0.0	0.0	1.0	0.0	0.0	0.0	0.0	0.0	0.0	0.0	0.0	0.0	0.0	0.0	0.0	0.0
KCNJ9	16524	symbol	M. musculus	16524	M. musculus	Kcnj9	potassium inwardly-rectifying channel, subfamily J, member 9	GO:0099505 regulation of presynaptic membrane potential;GO:1990573 potassium ion import across plasma membrane;GO:0098659 inorganic cation import across plasma membrane		0.0	0.0	0.0	0.0	0.0	0.0	1.0	0.0	0.0	0.0	0.0	0.0	0.0	0.0	0.0	0.0	0.0	0.0	0.0	0.0
KCNN4	16534	symbol	M. musculus	16534	M. musculus	Kcnn4	potassium intermediate/small conductance calcium-activated channel, subfamily N, member 4	GO:1904898 negative regulation of hepatic stellate cell proliferation;GO:1900133 regulation of renin secretion into blood stream;GO:1904897 regulation of hepatic stellate cell proliferation		0.0	0.0	0.0	1.0	0.0	0.0	0.0	0.0	1.0	0.0	1.0	0.0	0.0	1.0	0.0	0.0	0.0	0.0	0.0	1.0
KCTD21	622320	symbol	M. musculus	622320	M. musculus	Kctd21	potassium channel tetramerisation domain containing 21	GO:0045879 negative regulation of smoothened signaling pathway;GO:0008589 regulation of smoothened signaling pathway;GO:0051260 protein homooligomerization		0.0	0.0	0.0	0.0	0.0	0.0	0.0	0.0	0.0	0.0	0.0	0.0	0.0	0.0	0.0	0.0	0.0	0.0	0.0	0.0
KCTD9	105440	symbol	M. musculus	105440	M. musculus	Kctd9	potassium channel tetramerisation domain containing 9	GO:0051260 protein homooligomerization;GO:0051259 protein complex oligomerization;GO:0065003 protein-containing complex assembly		0.0	0.0	0.0	0.0	0.0	0.0	0.0	0.0	0.0	0.0	0.0	0.0	0.0	0.0	0.0	0.0	0.0	0.0	0.0	0.0
KLC4	74764	symbol	M. musculus	74764	M. musculus	Klc4	kinesin light chain 4	GO:0007018 microtubule-based movement;GO:0007017 microtubule-based process;GO:0009987 cellular process		0.0	0.0	0.0	0.0	0.0	0.0	0.0	0.0	0.0	0.0	0.0	0.0	0.0	0.0	0.0	0.0	0.0	0.0	0.0	0.0
KLF10	21847	symbol	M. musculus	21847	M. musculus	Klf10	Kruppel-like transcription factor 10	GO:0045672 positive regulation of osteoclast differentiation;GO:0030282 bone mineralization;GO:0002763 positive regulation of myeloid leukocyte differentiation		0.0	0.0	0.0	0.0	0.0	0.0	0.0	0.0	0.0	0.0	0.0	0.0	0.0	0.0	0.0	0.0	0.0	0.0	0.0	0.0
KLF11	194655	symbol	M. musculus	194655	M. musculus	Klf11	Kruppel-like transcription factor 11	GO:2000045 regulation of G1/S transition of mitotic cell cycle;GO:1902806 regulation of cell cycle G1/S phase transition;GO:1901990 regulation of mitotic cell cycle phase transition		0.0	0.0	0.0	0.0	0.0	0.0	0.0	0.0	0.0	0.0	0.0	1.0	0.0	0.0	0.0	0.0	0.0	0.0	0.0	0.0
KLF13	50794	symbol	M. musculus	50794	M. musculus	Klf13	Kruppel-like transcription factor 13	GO:0045647 negative regulation of erythrocyte differentiation;GO:0045646 regulation of erythrocyte differentiation;GO:0045638 negative regulation of myeloid cell differentiation		0.0	0.0	0.0	0.0	0.0	0.0	0.0	0.0	0.0	0.0	0.0	0.0	0.0	0.0	0.0	0.0	0.0	0.0	0.0	0.0
KLF6	23849	symbol	M. musculus	23849	M. musculus	Klf6	Kruppel-like transcription factor 6	GO:1905205 positive regulation of connective tissue replacement;GO:0034105 positive regulation of tissue remodeling;GO:1905203 regulation of connective tissue replacement		0.0	0.0	0.0	0.0	0.0	0.0	0.0	0.0	0.0	0.0	0.0	0.0	0.0	0.0	0.0	0.0	0.0	0.0	0.0	0.0
KMT5C	232811	symbol	M. musculus	232811	M. musculus	Kmt5c	lysine methyltransferase 5C	GO:2001034 positive regulation of double-strand break repair via nonhomologous end joining;GO:2001032 regulation of double-strand break repair via nonhomologous end joining;GO:0045830 positive regulation of isotype switching		0.0	0.0	0.0	0.0	0.0	0.0	0.0	0.0	0.0	0.0	1.0	0.0	0.0	0.0	0.0	0.0	0.0	0.0	0.0	0.0
KRTCAP2	66059	symbol	M. musculus	66059	M. musculus	Krtcap2	keratinocyte associated protein 2	GO:0042543 protein N-linked glycosylation via arginine;GO:0018195 peptidyl-arginine modification;GO:0006487 protein N-linked glycosylation		0.0	0.0	0.0	0.0	0.0	0.0	0.0	0.0	0.0	0.0	0.0	0.0	0.0	0.0	0.0	0.0	0.0	0.0	0.0	0.0
LAMTOR2	83409	symbol	M. musculus	83409	M. musculus	Lamtor2	late endosomal/lysosomal adaptor, MAPK and MTOR activator 2	GO:0038202 TORC1 signaling;GO:0010761 fibroblast migration;GO:0031929 TOR signaling		0.0	1.0	0.0	0.0	0.0	0.0	0.0	0.0	0.0	1.0	0.0	0.0	0.0	0.0	0.0	0.0	0.0	0.0	0.0	0.0
LANCL2	71835	symbol	M. musculus	71835	M. musculus	Lancl2	LanC (bacterial lantibiotic synthetase component C)-like 2	GO:0009787 regulation of abscisic acid-activated signaling pathway;GO:0009789 positive regulation of abscisic acid-activated signaling pathway;GO:1901419 regulation of response to alcohol		0.0	0.0	0.0	0.0	0.0	0.0	0.0	0.0	0.0	0.0	0.0	0.0	0.0	0.0	0.0	0.0	0.0	0.0	1.0	0.0
LARP1B	214048	symbol	M. musculus	214048	M. musculus	Larp1b	La ribonucleoprotein 1B			0.0	0.0	0.0	0.0	0.0	0.0	0.0	0.0	0.0	0.0	0.0	0.0	0.0	0.0	0.0	0.0	0.0	0.0	0.0	0.0
LAT2	56743	symbol	M. musculus	56743	M. musculus	Lat2	linker for activation of T cells family, member 2	GO:0002279 mast cell activation involved in immune response;GO:0043303 mast cell degranulation;GO:0002448 mast cell mediated immunity		0.0	0.0	0.0	0.0	0.0	0.0	0.0	0.0	0.0	0.0	1.0	0.0	0.0	0.0	0.0	1.0	1.0	0.0	0.0	0.0
LBP	16803	symbol	M. musculus	16803	M. musculus	Lbp	lipopolysaccharide binding protein	GO:0015920 lipopolysaccharide transport;GO:0060265 positive regulation of respiratory burst involved in inflammatory response;GO:0002232 leukocyte chemotaxis involved in inflammatory response		0.0	0.0	0.0	1.0	1.0	1.0	0.0	1.0	1.0	0.0	1.0	0.0	0.0	1.0	0.0	1.0	0.0	0.0	0.0	0.0
LDLRAP1	100017	symbol	M. musculus	100017	M. musculus	Ldlrap1	low density lipoprotein receptor adaptor protein 1	GO:1905602 positive regulation of receptor-mediated endocytosis involved in cholesterol transport;GO:1905581 positive regulation of low-density lipoprotein particle clearance;GO:0032382 positive regulation of intracellular sterol transport		0.0	0.0	1.0	0.0	0.0	0.0	1.0	0.0	0.0	0.0	0.0	0.0	0.0	1.0	0.0	0.0	0.0	0.0	0.0	0.0
LIFR	16880	symbol	M. musculus	16880	M. musculus	Lifr	LIF receptor alpha	GO:0038165 oncostatin-M-mediated signaling pathway;GO:0048861 leukemia inhibitory factor signaling pathway;GO:0070120 ciliary neurotrophic factor-mediated signaling pathway		0.0	0.0	0.0	0.0	0.0	0.0	0.0	0.0	0.0	0.0	0.0	0.0	0.0	0.0	0.0	0.0	0.0	0.0	0.0	0.0
LIMD1	29806	symbol	M. musculus	29806	M. musculus	Limd1	LIM domains containing 1	GO:0035331 negative regulation of hippo signaling;GO:0033962 P-body assembly;GO:0002076 osteoblast development		0.0	0.0	0.0	0.0	0.0	0.0	0.0	0.0	0.0	1.0	0.0	0.0	0.0	0.0	0.0	0.0	0.0	0.0	0.0	0.0
LIMK2	16886	symbol	M. musculus	16886	M. musculus	Limk2	LIM domain kinase 2	GO:0061303 cornea development in camera-type eye;GO:0030953 astral microtubule organization;GO:1902018 negative regulation of cilium assembly	yes	0.0	0.0	0.0	0.0	0.0	0.0	0.0	0.0	0.0	0.0	0.0	0.0	0.0	0.0	0.0	0.0	0.0	1.0	0.0	0.0
LMBR1L	74775	symbol	M. musculus	74775	M. musculus	Lmbr1l	limb region 1 like	GO:0060218 hematopoietic stem cell differentiation;GO:0070231 T cell apoptotic process;GO:0070227 lymphocyte apoptotic process		0.0	0.0	0.0	0.0	0.0	0.0	1.0	0.0	0.0	0.0	0.0	0.0	0.0	0.0	0.0	1.0	0.0	0.0	0.0	0.0
LMF2	105847	symbol	M. musculus	105847	M. musculus	Lmf2	lipase maturation factor 2	GO:0051604 protein maturation;GO:0010467 gene expression;GO:0009059 macromolecule biosynthetic process		0.0	0.0	1.0	0.0	0.0	0.0	0.0	0.0	0.0	0.0	0.0	0.0	0.0	0.0	0.0	0.0	0.0	0.0	0.0	0.0
LMLN	239833	symbol	M. musculus	239833	M. musculus	Lmln	leishmanolysin-like (metallopeptidase M8 family)	GO:0051301 cell division;GO:0007155 cell adhesion;GO:0006508 proteolysis		0.0	0.0	0.0	0.0	0.0	0.0	0.0	0.0	0.0	0.0	0.0	0.0	0.0	0.0	0.0	0.0	0.0	0.0	0.0	0.0
LONP1	74142	symbol	M. musculus	74142	M. musculus	Lonp1	lon peptidase 1, mitochondrial	GO:0070407 oxidation-dependent protein catabolic process;GO:0006515 protein quality control for misfolded or incompletely synthesized proteins;GO:0051131 chaperone-mediated protein complex assembly		0.0	0.0	0.0	0.0	0.0	0.0	0.0	0.0	0.0	0.0	0.0	0.0	0.0	0.0	0.0	0.0	0.0	0.0	0.0	0.0
LOXL4	67573	symbol	M. musculus	67573	M. musculus	Loxl4	lysyl oxidase-like 4	GO:0018057 peptidyl-lysine oxidation;GO:0018158 protein oxidation;GO:0030199 collagen fibril organization		0.0	0.0	0.0	0.0	0.0	0.0	0.0	0.0	0.0	0.0	0.0	0.0	0.0	0.0	0.0	0.0	0.0	0.0	0.0	0.0
LPCAT4	99010	symbol	M. musculus	99010	M. musculus	Lpcat4	lysophosphatidylcholine acyltransferase 4	GO:0036150 phosphatidylserine acyl-chain remodeling;GO:0036152 phosphatidylethanolamine acyl-chain remodeling;GO:0036151 phosphatidylcholine acyl-chain remodeling		0.0	0.0	0.0	0.0	0.0	0.0	0.0	0.0	0.0	0.0	0.0	0.0	0.0	0.0	0.0	0.0	0.0	0.0	0.0	0.0
LRRC25	211228	symbol	M. musculus	211228	M. musculus	Lrrc25	leucine rich repeat containing 25	GO:0008150 biological_process		0.0	0.0	0.0	0.0	0.0	0.0	0.0	0.0	0.0	0.0	0.0	0.0	0.0	0.0	0.0	0.0	0.0	0.0	0.0	0.0
LRRC49	102747	symbol	M. musculus	102747	M. musculus	Lrrc49	leucine rich repeat containing 49			0.0	0.0	0.0	0.0	0.0	0.0	0.0	0.0	0.0	0.0	0.0	0.0	0.0	0.0	0.0	0.0	0.0	0.0	0.0	0.0
LRRC8B	433926	symbol	M. musculus	433926	M. musculus	Lrrc8b	leucine rich repeat containing 8 family, member B	GO:0140361 cyclic-GMP-AMP transmembrane import across plasma membrane;GO:1903790 guanine nucleotide transmembrane transport;GO:0001408 guanine nucleotide transport		0.0	0.0	1.0	0.0	0.0	0.0	1.0	0.0	0.0	0.0	0.0	0.0	0.0	0.0	0.0	0.0	0.0	0.0	0.0	0.0
LRRC8C	100604	symbol	M. musculus	100604	M. musculus	Lrrc8c	leucine rich repeat containing 8 family, member C	GO:0015734 taurine transmembrane transport;GO:0042918 alkanesulfonate transmembrane transport;GO:0140361 cyclic-GMP-AMP transmembrane import across plasma membrane		0.0	0.0	1.0	0.0	0.0	0.0	1.0	0.0	0.0	0.0	0.0	0.0	0.0	0.0	0.0	0.0	0.0	0.0	0.0	0.0
LRRK2	66725	symbol	M. musculus	66725	M. musculus	Lrrk2	leucine-rich repeat kinase 2	GO:1903125 negative regulation of thioredoxin peroxidase activity by peptidyl-threonine phosphorylation;GO:1904887 Wnt signalosome assembly;GO:0071287 cellular response to manganese ion	yes	0.0	0.0	0.0	0.0	0.0	0.0	1.0	0.0	1.0	0.0	1.0	1.0	0.0	0.0	1.0	0.0	1.0	1.0	1.0	0.0
LSM10	116748	symbol	M. musculus	116748	M. musculus	Lsm10	U7 snRNP-specific Sm-like protein LSM10	GO:0006398 mRNA 3'-end processing by stem-loop binding and cleavage;GO:0008334 histone mRNA metabolic process;GO:0031124 mRNA 3'-end processing		1.0	0.0	0.0	0.0	0.0	0.0	0.0	0.0	0.0	0.0	0.0	0.0	0.0	0.0	0.0	0.0	0.0	0.0	0.0	0.0
LXN	17035	symbol	M. musculus	17035	M. musculus	Lxn	latexin	GO:0050965 detection of temperature stimulus involved in sensory perception of pain;GO:0050961 detection of temperature stimulus involved in sensory perception;GO:0016048 detection of temperature stimulus		0.0	0.0	0.0	0.0	1.0	0.0	0.0	0.0	0.0	0.0	0.0	0.0	0.0	0.0	1.0	0.0	0.0	0.0	0.0	0.0
LYL1	17095	symbol	M. musculus	17095	M. musculus	Lyl1	lymphoblastomic leukemia 1	GO:0001955 blood vessel maturation;GO:0060216 definitive hemopoiesis;GO:0030183 B cell differentiation		0.0	0.0	0.0	0.0	0.0	0.0	0.0	0.0	0.0	0.0	0.0	0.0	0.0	0.0	0.0	1.0	0.0	0.0	0.0	0.0
MAN1B1	227619	symbol	M. musculus	227619	M. musculus	Man1b1	mannosidase, alpha, class 1B, member 1	GO:0006056 mannoprotein metabolic process;GO:0006058 mannoprotein catabolic process;GO:0035977 protein deglycosylation involved in glycoprotein catabolic process		0.0	0.0	0.0	0.0	0.0	0.0	0.0	0.0	0.0	0.0	0.0	0.0	0.0	0.0	0.0	0.0	0.0	0.0	1.0	0.0
MAN2A1	17158	symbol	M. musculus	17158	M. musculus	Man2a1	mannosidase 2, alpha 1	GO:0006013 mannose metabolic process;GO:0006491 N-glycan processing;GO:0006517 protein deglycosylation		0.0	0.0	0.0	0.0	0.0	0.0	0.0	0.0	0.0	0.0	0.0	0.0	0.0	0.0	0.0	0.0	0.0	0.0	1.0	0.0
MAN2B1	17159	symbol	M. musculus	17159	M. musculus	Man2b1	mannosidase 2, alpha B1	GO:0006013 mannose metabolic process;GO:0009313 oligosaccharide catabolic process;GO:0009311 oligosaccharide metabolic process		0.0	1.0	0.0	0.0	0.0	0.0	0.0	0.0	0.0	0.0	0.0	0.0	1.0	0.0	0.0	0.0	0.0	0.0	1.0	0.0
MAP3K14	53859	symbol	M. musculus	53859	M. musculus	Map3k14	mitogen-activated protein kinase kinase kinase 14	GO:0038061 non-canonical NF-kappaB signal transduction;GO:0007249 canonical NF-kappaB signal transduction;GO:0051607 defense response to virus	yes	0.0	0.0	0.0	0.0	0.0	0.0	0.0	0.0	0.0	0.0	0.0	0.0	0.0	0.0	0.0	0.0	1.0	0.0	0.0	0.0
MAP3K5	26408	symbol	M. musculus	26408	M. musculus	Map3k5	mitogen-activated protein kinase kinase kinase 5	GO:0036480 neuron intrinsic apoptotic signaling pathway in response to oxidative stress;GO:1902170 cellular response to reactive nitrogen species;GO:0038066 p38MAPK cascade	yes	0.0	0.0	0.0	0.0	0.0	0.0	0.0	0.0	0.0	1.0	1.0	1.0	0.0	0.0	1.0	0.0	1.0	0.0	0.0	1.0
MAP3K6	53608	symbol	M. musculus	53608	M. musculus	Map3k6	mitogen-activated protein kinase kinase kinase 6	GO:0000165 MAPK cascade;GO:0006468 protein phosphorylation;GO:0141124 intracellular signaling cassette		0.0	0.0	0.0	0.0	0.0	0.0	0.0	0.0	0.0	0.0	0.0	0.0	0.0	0.0	0.0	0.0	1.0	0.0	0.0	0.0
MAP4K1	26411	symbol	M. musculus	26411	M. musculus	Map4k1	mitogen-activated protein kinase kinase kinase kinase 1	GO:1904627 response to phorbol 13-acetate 12-myristate;GO:1904628 cellular response to phorbol 13-acetate 12-myristate;GO:0007254 JNK cascade	yes	0.0	0.0	0.0	0.0	0.0	0.0	0.0	0.0	0.0	0.0	0.0	0.0	0.0	0.0	0.0	0.0	1.0	0.0	0.0	0.0
MAP7D3	320923	symbol	M. musculus	320923	M. musculus	Map7d3	MAP7 domain containing 3	GO:0046785 microtubule polymerization;GO:0031109 microtubule polymerization or depolymerization;GO:0051258 protein polymerization		0.0	0.0	0.0	0.0	0.0	0.0	0.0	0.0	0.0	0.0	0.0	0.0	0.0	0.0	0.0	0.0	0.0	0.0	0.0	0.0
MAPK4	225724	symbol	M. musculus	225724	M. musculus	Mapk4	mitogen-activated protein kinase 4	GO:0006468 protein phosphorylation;GO:0016310 phosphorylation;GO:0007049 cell cycle	yes	0.0	0.0	0.0	0.0	0.0	0.0	0.0	0.0	0.0	0.0	0.0	0.0	0.0	0.0	0.0	0.0	0.0	0.0	0.0	0.0
MAPKAPK2	17164	symbol	M. musculus	17164	M. musculus	Mapkapk2	MAP kinase-activated protein kinase 2	GO:0044351 macropinocytosis;GO:0006907 pinocytosis;GO:0038066 p38MAPK cascade	yes	1.0	0.0	0.0	0.0	1.0	1.0	1.0	0.0	1.0	1.0	1.0	0.0	0.0	0.0	0.0	0.0	1.0	0.0	0.0	0.0
MAPKAPK3	102626	symbol	M. musculus	102626	M. musculus	Mapkapk3	mitogen-activated protein kinase-activated protein kinase 3	GO:0044351 macropinocytosis;GO:0006907 pinocytosis;GO:0002224 toll-like receptor signaling pathway	yes	0.0	0.0	0.0	0.0	0.0	0.0	1.0	0.0	0.0	1.0	1.0	0.0	0.0	0.0	0.0	0.0	0.0	0.0	0.0	0.0
MARVELD1	277010	symbol	M. musculus	277010	M. musculus	Marveld1	MARVEL (membrane-associating) domain containing 1	GO:0042552 myelination;GO:0007272 ensheathment of neurons;GO:0008366 axon ensheathment		0.0	0.0	0.0	0.0	0.0	0.0	0.0	0.0	0.0	0.0	0.0	0.0	0.0	0.0	0.0	0.0	0.0	0.0	0.0	0.0
MATN2	17181	symbol	M. musculus	17181	M. musculus	Matn2	matrilin 2	GO:0031104 dendrite regeneration;GO:0031102 neuron projection regeneration;GO:0048678 response to axon injury		0.0	0.0	0.0	0.0	0.0	0.0	0.0	0.0	0.0	0.0	0.0	0.0	0.0	0.0	0.0	0.0	0.0	0.0	0.0	0.0
MBNL3	171170	symbol	M. musculus	171170	M. musculus	Mbnl3	muscleblind like splicing factor 3	GO:0045662 negative regulation of myoblast differentiation;GO:0045661 regulation of myoblast differentiation;GO:0043484 regulation of RNA splicing		0.0	0.0	0.0	0.0	0.0	0.0	0.0	0.0	0.0	0.0	0.0	0.0	0.0	0.0	0.0	0.0	0.0	0.0	0.0	0.0
MCM2	17216	symbol	M. musculus	17216	M. musculus	Mcm2	minichromosome maintenance complex component 2	GO:1905775 negative regulation of DNA helicase activity;GO:0051097 negative regulation of helicase activity;GO:1905463 negative regulation of DNA duplex unwinding		0.0	0.0	0.0	0.0	0.0	0.0	0.0	0.0	0.0	0.0	0.0	0.0	0.0	0.0	0.0	0.0	0.0	1.0	0.0	0.0
MCM9	71567	symbol	M. musculus	71567	M. musculus	Mcm9	minichromosome maintenance 9 homologous recombination repair factor	GO:0070716 mismatch repair involved in maintenance of fidelity involved in DNA-dependent DNA replication;GO:0036298 recombinational interstrand cross-link repair;GO:0006298 mismatch repair		0.0	0.0	0.0	0.0	0.0	0.0	0.0	0.0	0.0	0.0	0.0	0.0	0.0	0.0	0.0	0.0	0.0	0.0	0.0	0.0
MED28	66999	symbol	M. musculus	66999	M. musculus	Med28	mediator complex subunit 28	GO:0051151 negative regulation of smooth muscle cell differentiation;GO:0051150 regulation of smooth muscle cell differentiation;GO:0051123 RNA polymerase II preinitiation complex assembly		0.0	0.0	0.0	0.0	0.0	0.0	0.0	0.0	0.0	0.0	0.0	0.0	0.0	0.0	0.0	0.0	0.0	0.0	0.0	0.0
METRNL	210029	symbol	M. musculus	210029	M. musculus	Metrnl	meteorin, glial cell differentiation regulator-like	GO:0090336 positive regulation of brown fat cell differentiation;GO:0090335 regulation of brown fat cell differentiation;GO:0014850 response to muscle activity		0.0	0.0	0.0	0.0	0.0	0.0	0.0	0.0	0.0	0.0	0.0	0.0	0.0	0.0	0.0	0.0	0.0	0.0	0.0	0.0
MFSD10	68294	symbol	M. musculus	68294	M. musculus	Mfsd10	major facilitator superfamily domain containing 10	GO:0043252 sodium-independent organic anion transport;GO:0015711 organic anion transport;GO:0006915 apoptotic process		0.0	0.0	0.0	0.0	0.0	0.0	0.0	0.0	0.0	0.0	0.0	0.0	0.0	0.0	0.0	0.0	0.0	0.0	0.0	0.0
MFSD11	69900	symbol	M. musculus	69900	M. musculus	Mfsd11	major facilitator superfamily domain containing 11	GO:0008150 biological_process		0.0	0.0	0.0	0.0	0.0	0.0	0.0	0.0	0.0	0.0	0.0	0.0	0.0	0.0	0.0	0.0	0.0	0.0	0.0	0.0
MFSD5	106073	symbol	M. musculus	106073	M. musculus	Mfsd5	major facilitator superfamily domain containing 5	GO:0015689 molybdate ion transport;GO:0015698 inorganic anion transport;GO:0006811 monoatomic ion transport		0.0	0.0	0.0	0.0	0.0	0.0	0.0	0.0	0.0	0.0	0.0	0.0	0.0	0.0	0.0	0.0	0.0	0.0	0.0	0.0
MFSD6	98682	symbol	M. musculus	98682	M. musculus	Mfsd6	major facilitator superfamily domain containing 6	GO:0042590 antigen processing and presentation of exogenous peptide antigen via MHC class I;GO:0002478 antigen processing and presentation of exogenous peptide antigen;GO:0019884 antigen processing and presentation of exogenous antigen		0.0	0.0	0.0	0.0	0.0	0.0	0.0	0.0	0.0	0.0	0.0	0.0	0.0	0.0	0.0	1.0	0.0	0.0	0.0	0.0
MICAL1	171580	symbol	M. musculus	171580	M. musculus	Mical1	microtubule associated monooxygenase, calponin and LIM domain containing 1	GO:0019417 sulfur oxidation;GO:0030042 actin filament depolymerization;GO:0051261 protein depolymerization		0.0	0.0	0.0	0.0	0.0	0.0	0.0	0.0	0.0	0.0	0.0	0.0	0.0	0.0	1.0	0.0	0.0	0.0	0.0	0.0
MIIP	28010	symbol	M. musculus	28010	M. musculus	Miip	migration and invasion inhibitory protein	GO:0010972 negative regulation of G2/M transition of mitotic cell cycle;GO:1902750 negative regulation of cell cycle G2/M phase transition;GO:0010389 regulation of G2/M transition of mitotic cell cycle		0.0	0.0	0.0	0.0	0.0	0.0	0.0	0.0	0.0	0.0	0.0	0.0	0.0	0.0	0.0	0.0	0.0	0.0	0.0	0.0
MILR1	380732	symbol	M. musculus	380732	M. musculus	Milr1	mast cell immunoglobulin like receptor 1	GO:0033004 negative regulation of mast cell activation;GO:0033003 regulation of mast cell activation;GO:0002279 mast cell activation involved in immune response		0.0	0.0	0.0	0.0	0.0	0.0	0.0	0.0	0.0	0.0	0.0	0.0	0.0	0.0	0.0	1.0	0.0	0.0	0.0	0.0
MINK1	50932	symbol	M. musculus	50932	M. musculus	Mink1	misshapen-like kinase 1 (zebrafish)	GO:0045060 negative thymic T cell selection;GO:0043383 negative T cell selection;GO:0045061 thymic T cell selection	yes	0.0	0.0	0.0	0.0	0.0	0.0	0.0	0.0	0.0	1.0	0.0	0.0	0.0	0.0	0.0	1.0	1.0	0.0	0.0	1.0
MITD1	69028	symbol	M. musculus	69028	M. musculus	Mitd1	MIT, microtubule interacting and transport, domain containing 1	GO:0061952 midbody abscission;GO:1902410 mitotic cytokinetic process;GO:0032506 cytokinetic process		0.0	0.0	0.0	0.0	0.0	0.0	0.0	0.0	0.0	0.0	0.0	0.0	0.0	0.0	0.0	0.0	0.0	0.0	0.0	0.0
MKKS	59030	symbol	M. musculus	59030	M. musculus	Mkks	McKusick-Kaufman syndrome	GO:0038108 negative regulation of appetite by leptin-mediated signaling pathway;GO:0060296 regulation of cilium beat frequency involved in ciliary motility;GO:0033210 leptin-mediated signaling pathway		0.0	0.0	0.0	0.0	0.0	0.0	0.0	0.0	0.0	0.0	0.0	0.0	0.0	0.0	0.0	0.0	0.0	1.0	0.0	0.0
MLLT11	56772	symbol	M. musculus	56772	M. musculus	Mllt11	myeloid/lymphoid or mixed-lineage leukemia; translocated to, 11	GO:0051901 positive regulation of mitochondrial depolarization;GO:1904181 positive regulation of membrane depolarization;GO:0051900 regulation of mitochondrial depolarization		0.0	0.0	0.0	0.0	0.0	0.0	0.0	0.0	0.0	0.0	0.0	1.0	0.0	0.0	0.0	0.0	0.0	0.0	0.0	0.0
MLLT6	246198	symbol	M. musculus	246198	M. musculus	Mllt6	myeloid/lymphoid or mixed-lineage leukemia; translocated to, 6	GO:0036359 renal potassium excretion;GO:0035812 renal sodium excretion;GO:0070295 renal water absorption		0.0	0.0	0.0	0.0	0.0	0.0	0.0	0.0	0.0	0.0	0.0	0.0	0.0	0.0	0.0	0.0	0.0	0.0	0.0	0.0
MMP14	17387	symbol	M. musculus	17387	M. musculus	Mmp14	matrix metallopeptidase 14 (membrane-inserted)	GO:0010831 positive regulation of myotube differentiation;GO:0051895 negative regulation of focal adhesion assembly;GO:0150118 negative regulation of cell-substrate junction organization		0.0	0.0	0.0	0.0	0.0	0.0	0.0	1.0	0.0	0.0	0.0	0.0	0.0	0.0	1.0	0.0	0.0	1.0	0.0	0.0
MNDA	381308	gene_synonym	M. musculus	381308	M. musculus	Ifi211	interferon activated gene 211	GO:0035458 cellular response to interferon-beta;GO:0035456 response to interferon-beta;GO:0002218 activation of innate immune response		0.0	1.0	0.0	0.0	0.0	0.0	0.0	0.0	0.0	0.0	1.0	0.0	0.0	0.0	0.0	0.0	0.0	0.0	0.0	0.0
MOB3A	208228	symbol	M. musculus	208228	M. musculus	Mob3a	MOB kinase activator 3A	GO:0001934 positive regulation of protein phosphorylation;GO:0042327 positive regulation of phosphorylation;GO:0010562 positive regulation of phosphorus metabolic process		0.0	0.0	0.0	0.0	0.0	0.0	0.0	0.0	0.0	0.0	0.0	0.0	0.0	0.0	0.0	0.0	0.0	0.0	0.0	0.0
MOB3B	214944	symbol	M. musculus	214944	M. musculus	Mob3b	MOB kinase activator 3B	GO:0035330 regulation of hippo signaling;GO:0001934 positive regulation of protein phosphorylation;GO:0042327 positive regulation of phosphorylation		0.0	0.0	0.0	0.0	0.0	0.0	0.0	0.0	0.0	0.0	0.0	0.0	0.0	0.0	0.0	0.0	0.0	0.0	0.0	0.0
MOCOS	68591	symbol	M. musculus	68591	M. musculus	Mocos	molybdenum cofactor sulfurase	GO:0006777 Mo-molybdopterin cofactor biosynthetic process;GO:0019720 Mo-molybdopterin cofactor metabolic process;GO:0032324 molybdopterin cofactor biosynthetic process		0.0	0.0	0.0	0.0	0.0	0.0	0.0	0.0	0.0	0.0	0.0	0.0	0.0	0.0	0.0	0.0	0.0	0.0	0.0	0.0
MPP1	17524	symbol	M. musculus	17524	M. musculus	Mpp1	membrane protein, palmitoylated	GO:0090022 regulation of neutrophil chemotaxis;GO:1902622 regulation of neutrophil migration;GO:0071622 regulation of granulocyte chemotaxis	yes	0.0	0.0	0.0	0.0	0.0	0.0	0.0	1.0	0.0	0.0	0.0	0.0	0.0	0.0	0.0	0.0	0.0	0.0	0.0	0.0
MPV17	17527	symbol	M. musculus	17527	M. musculus	Mpv17	MpV17 mitochondrial inner membrane protein	GO:1901858 regulation of mitochondrial DNA metabolic process;GO:0032836 glomerular basement membrane development;GO:0000002 mitochondrial genome maintenance		0.0	0.0	0.0	0.0	0.0	0.0	0.0	0.0	0.0	0.0	0.0	0.0	0.0	0.0	0.0	0.0	0.0	0.0	0.0	0.0
MRC1	17533	symbol	M. musculus	17533	M. musculus	Mrc1	mannose receptor, C type 1	GO:0071353 cellular response to interleukin-4;GO:0070670 response to interleukin-4;GO:0071346 cellular response to type II interferon		0.0	0.0	0.0	0.0	0.0	0.0	1.0	0.0	1.0	0.0	1.0	0.0	0.0	0.0	0.0	0.0	0.0	0.0	0.0	0.0
MRE11	17535	gene_synonym	M. musculus	17535	M. musculus	Mre11a	MRE11A homolog A, double strand break repair nuclease	GO:0097551 mitochondrial double-strand break repair;GO:0097552 mitochondrial double-strand break repair via homologous recombination;GO:0031860 telomeric 3' overhang formation		0.0	0.0	0.0	0.0	0.0	0.0	0.0	0.0	0.0	1.0	0.0	0.0	0.0	0.0	0.0	0.0	0.0	0.0	0.0	0.0
MSH3	17686	symbol	M. musculus	17686	M. musculus	Msh3	mutS homolog 3	GO:0043570 maintenance of DNA repeat elements;GO:0051096 positive regulation of helicase activity;GO:0051095 regulation of helicase activity		0.0	0.0	0.0	0.0	0.0	1.0	0.0	0.0	0.0	0.0	0.0	0.0	0.0	0.0	0.0	0.0	0.0	0.0	0.0	0.0
MSRB1	27361	symbol	M. musculus	27361	M. musculus	Msrb1	methionine sulfoxide reductase B1	GO:0030091 protein repair;GO:0030041 actin filament polymerization;GO:0008154 actin polymerization or depolymerization		0.0	0.0	0.0	0.0	0.0	0.0	0.0	0.0	0.0	0.0	1.0	0.0	0.0	0.0	0.0	0.0	0.0	0.0	0.0	0.0
MT1F						None	None	None	None	nan	nan	nan	nan	nan	nan	nan	nan	nan	nan	nan	nan	nan	nan	nan	nan	nan	nan	nan	nan
MTA1	116870	symbol	M. musculus	116870	M. musculus	Mta1	metastasis associated 1	GO:1902499 positive regulation of protein autoubiquitination;GO:1902498 regulation of protein autoubiquitination;GO:0045475 locomotor rhythm		0.0	0.0	0.0	0.0	0.0	0.0	0.0	0.0	0.0	0.0	0.0	0.0	0.0	0.0	0.0	0.0	0.0	0.0	0.0	0.0
MTA3	116871	symbol	M. musculus	116871	M. musculus	Mta3	metastasis associated 3	GO:1990739 granulosa cell proliferation;GO:1904195 regulation of granulosa cell proliferation;GO:1904197 positive regulation of granulosa cell proliferation		0.0	0.0	0.0	0.0	0.0	0.0	0.0	0.0	0.0	0.0	0.0	0.0	0.0	0.0	0.0	0.0	0.0	0.0	0.0	0.0
MTHFR	17769	symbol	M. musculus	17769	M. musculus	Mthfr	methylenetetrahydrofolate reductase	GO:0050667 homocysteine metabolic process;GO:0009086 methionine biosynthetic process;GO:0035999 tetrahydrofolate interconversion		0.0	0.0	0.0	0.0	0.0	0.0	0.0	0.0	0.0	0.0	0.0	0.0	0.0	0.0	0.0	0.0	0.0	0.0	0.0	0.0
MVP	78388	symbol	M. musculus	78388	M. musculus	Mvp	major vault protein	GO:0031953 negative regulation of protein autophosphorylation;GO:0072376 protein activation cascade;GO:0061099 negative regulation of protein tyrosine kinase activity		0.0	1.0	0.0	0.0	0.0	0.0	0.0	0.0	0.0	0.0	0.0	0.0	0.0	0.0	0.0	0.0	0.0	0.0	0.0	0.0
MYADM	50918	symbol	M. musculus	50918	M. musculus	Myadm	myeloid-associated differentiation marker	GO:0090038 negative regulation of protein kinase C signaling;GO:0044860 protein localization to plasma membrane raft;GO:0034115 negative regulation of heterotypic cell-cell adhesion		0.0	0.0	0.0	0.0	0.0	0.0	0.0	1.0	0.0	0.0	0.0	0.0	0.0	0.0	0.0	0.0	0.0	1.0	0.0	0.0
MYC	17869	symbol	M. musculus	17869	M. musculus	Myc	myelocytomatosis oncogene	GO:0090095 regulation of metanephric cap mesenchymal cell proliferation;GO:0090096 positive regulation of metanephric cap mesenchymal cell proliferation;GO:0046722 lactic acid secretion		0.0	0.0	0.0	0.0	0.0	0.0	0.0	1.0	0.0	0.0	0.0	1.0	0.0	0.0	1.0	1.0	1.0	0.0	1.0	0.0
MYO1C	17913	symbol	M. musculus	17913	M. musculus	Myo1c	myosin IC	GO:0030050 vesicle transport along actin filament;GO:0099515 actin filament-based transport;GO:0038084 vascular endothelial growth factor signaling pathway		0.0	0.0	0.0	0.0	0.0	0.0	1.0	1.0	0.0	0.0	1.0	0.0	0.0	0.0	0.0	0.0	0.0	0.0	0.0	0.0
MYO1G	246177	symbol	M. musculus	246177	M. musculus	Myo1g	myosin IG	GO:0002433 immune response-regulating cell surface receptor signaling pathway involved in phagocytosis;GO:0038096 Fc-gamma receptor signaling pathway involved in phagocytosis;GO:0071976 cell gliding		0.0	0.0	0.0	1.0	0.0	0.0	1.0	0.0	0.0	0.0	1.0	0.0	0.0	0.0	0.0	1.0	0.0	0.0	0.0	0.0
MYO9B	17925	symbol	M. musculus	17925	M. musculus	Myo9b	myosin IXb	GO:0035385 Roundabout signaling pathway;GO:0072673 lamellipodium morphogenesis;GO:0033275 actin-myosin filament sliding		0.0	0.0	0.0	1.0	0.0	0.0	0.0	0.0	0.0	0.0	0.0	0.0	0.0	0.0	0.0	0.0	1.0	0.0	0.0	0.0
MYOF	226101	symbol	M. musculus	226101	M. musculus	Myof	myoferlin	GO:0033292 T-tubule organization;GO:0006071 glycerol metabolic process;GO:0019400 alditol metabolic process		0.0	0.0	0.0	0.0	0.0	0.0	0.0	0.0	0.0	0.0	0.0	0.0	0.0	0.0	0.0	0.0	0.0	0.0	1.0	0.0
NABP1	109019	symbol	M. musculus	109019	M. musculus	Nabp1	nucleic acid binding protein 1	GO:0044818 mitotic G2/M transition checkpoint;GO:0010972 negative regulation of G2/M transition of mitotic cell cycle;GO:1902750 negative regulation of cell cycle G2/M phase transition		0.0	0.0	0.0	0.0	0.0	0.0	0.0	0.0	0.0	0.0	0.0	0.0	0.0	0.0	0.0	0.0	0.0	0.0	0.0	0.0
NAGA	17939	symbol	M. musculus	17939	M. musculus	Naga	N-acetyl galactosaminidase, alpha	GO:0016139 glycoside catabolic process;GO:0019377 glycolipid catabolic process;GO:0016137 glycoside metabolic process		0.0	0.0	0.0	0.0	0.0	0.0	0.0	0.0	0.0	0.0	0.0	0.0	1.0	0.0	0.0	0.0	0.0	0.0	1.0	0.0
NAGK	56174	symbol	M. musculus	56174	M. musculus	Nagk	N-acetylglucosamine kinase	GO:0070434 positive regulation of nucleotide-binding oligomerization domain containing 2 signaling pathway;GO:0070426 positive regulation of nucleotide-binding domain, leucine rich repeat containing receptor signaling pathway;GO:0019262 N-acetylneuraminate catabolic process	yes	0.0	0.0	0.0	0.0	0.0	0.0	0.0	0.0	0.0	0.0	1.0	0.0	0.0	0.0	0.0	0.0	0.0	0.0	1.0	0.0
NAPRT	223646	symbol	M. musculus	223646	M. musculus	Naprt	nicotinate phosphoribosyltransferase	GO:0019365 pyridine nucleotide salvage;GO:0034355 NAD salvage;GO:0009435 NAD biosynthetic process		0.0	1.0	0.0	0.0	0.0	0.0	0.0	0.0	0.0	0.0	0.0	0.0	0.0	0.0	0.0	0.0	0.0	0.0	1.0	0.0
NAPSA	16541	symbol	M. musculus	16541	M. musculus	Napsa	napsin A aspartic peptidase	GO:0043129 surfactant homeostasis;GO:0033619 membrane protein proteolysis;GO:0140962 multicellular organismal-level chemical homeostasis		0.0	0.0	0.0	0.0	0.0	0.0	0.0	0.0	0.0	0.0	0.0	0.0	1.0	0.0	0.0	0.0	0.0	0.0	0.0	0.0
NAT9	66176	symbol	M. musculus	66176	M. musculus	Nat9	N-acetyltransferase 9 (GCN5-related, putative)			0.0	0.0	0.0	0.0	0.0	0.0	0.0	0.0	0.0	0.0	0.0	0.0	0.0	0.0	0.0	0.0	0.0	0.0	0.0	0.0
NCF4	17972	symbol	M. musculus	17972	M. musculus	Ncf4	neutrophil cytosolic factor 4	GO:0045730 respiratory burst;GO:0042554 superoxide anion generation;GO:0006801 superoxide metabolic process		0.0	0.0	0.0	0.0	0.0	0.0	1.0	0.0	0.0	1.0	0.0	0.0	0.0	0.0	0.0	0.0	0.0	0.0	0.0	0.0
NCLN	103425	symbol	M. musculus	103425	M. musculus	Ncln	nicalin	GO:0160063 multi-pass transmembrane protein insertion into ER membrane;GO:0061635 regulation of protein complex stability;GO:0045048 protein insertion into ER membrane		0.0	0.0	0.0	0.0	0.0	0.0	0.0	0.0	0.0	0.0	0.0	0.0	0.0	0.0	0.0	0.0	0.0	0.0	0.0	0.0
NCOA1	17977	symbol	M. musculus	17977	M. musculus	Ncoa1	nuclear receptor coactivator 1	GO:0000409 regulation of transcription by galactose;GO:0000411 positive regulation of transcription by galactose;GO:0000431 regulation of transcription from RNA polymerase II promoter by galactose		0.0	0.0	0.0	0.0	0.0	0.0	0.0	0.0	0.0	1.0	1.0	1.0	0.0	0.0	0.0	0.0	0.0	0.0	0.0	0.0
NCOA5	228869	symbol	M. musculus	228869	M. musculus	Ncoa5	nuclear receptor coactivator 5	GO:0046627 negative regulation of insulin receptor signaling pathway;GO:1900077 negative regulation of cellular response to insulin stimulus;GO:0008286 insulin receptor signaling pathway		0.0	0.0	0.0	0.0	0.0	0.0	0.0	0.0	0.0	0.0	0.0	0.0	0.0	0.0	0.0	0.0	0.0	0.0	0.0	0.0
NCOA7	211329	symbol	M. musculus	211329	M. musculus	Ncoa7	nuclear receptor coactivator 7	GO:1902083 negative regulation of peptidyl-cysteine S-nitrosylation;GO:2000169 regulation of peptidyl-cysteine S-nitrosylation;GO:1900408 negative regulation of cellular response to oxidative stress		0.0	0.0	0.0	0.0	0.0	0.0	0.0	0.0	0.0	0.0	0.0	0.0	1.0	0.0	0.0	0.0	0.0	0.0	0.0	0.0
NDST1	15531	symbol	M. musculus	15531	M. musculus	Ndst1	N-deacetylase/N-sulfotransferase (heparan glucosaminyl) 1	GO:0006477 protein sulfation;GO:0015014 heparan sulfate proteoglycan biosynthetic process, polysaccharide chain biosynthetic process;GO:0048702 embryonic neurocranium morphogenesis		0.0	0.0	0.0	0.0	1.0	0.0	0.0	0.0	0.0	0.0	0.0	0.0	0.0	0.0	0.0	0.0	0.0	0.0	1.0	0.0
NDUFA13	67184	symbol	M. musculus	67184	M. musculus	Ndufa13	NADH:ubiquinone oxidoreductase subunit A13	GO:0045039 protein insertion into mitochondrial inner membrane;GO:1900119 positive regulation of execution phase of apoptosis;GO:0090151 establishment of protein localization to mitochondrial membrane		0.0	0.0	0.0	0.0	0.0	0.0	0.0	0.0	0.0	0.0	0.0	1.0	0.0	0.0	0.0	0.0	0.0	0.0	1.0	0.0
NDUFB7	66916	symbol	M. musculus	66916	M. musculus	Ndufb7	NADH:ubiquinone oxidoreductase subunit B7	GO:0042776 proton motive force-driven mitochondrial ATP synthesis;GO:0010257 NADH dehydrogenase complex assembly;GO:0032981 mitochondrial respiratory chain complex I assembly		0.0	0.0	0.0	0.0	0.0	0.0	0.0	0.0	0.0	0.0	0.0	0.0	0.0	0.0	0.0	0.0	0.0	0.0	1.0	0.0
NDUFS7	75406	symbol	M. musculus	75406	M. musculus	Ndufs7	NADH:ubiquinone oxidoreductase core subunit S7	GO:0015988 energy coupled proton transmembrane transport, against electrochemical gradient;GO:0015990 electron transport coupled proton transport;GO:0006120 mitochondrial electron transport, NADH to ubiquinone		0.0	0.0	0.0	0.0	0.0	0.0	0.0	0.0	0.0	0.0	0.0	0.0	0.0	0.0	0.0	0.0	0.0	0.0	1.0	0.0
NECAP1	67602	symbol	M. musculus	67602	M. musculus	Necap1	NECAP endocytosis associated 1	GO:0140238 presynaptic endocytosis;GO:0099003 vesicle-mediated transport in synapse;GO:0006897 endocytosis		0.0	0.0	0.0	0.0	0.0	0.0	1.0	0.0	0.0	0.0	0.0	0.0	0.0	0.0	0.0	0.0	0.0	0.0	0.0	0.0
NECAP2	66147	symbol	M. musculus	66147	M. musculus	Necap2	NECAP endocytosis associated 2	GO:0006897 endocytosis;GO:0098657 import into cell;GO:0015031 protein transport		0.0	0.0	0.0	0.0	0.0	0.0	1.0	0.0	0.0	0.0	0.0	0.0	0.0	0.0	0.0	0.0	0.0	0.0	0.0	0.0
NEDD4	17999	symbol	M. musculus	17999	M. musculus	Nedd4	neural precursor cell expressed, developmentally down-regulated 4	GO:0044111 formation of structure involved in a symbiotic process;GO:0042921 nuclear receptor-mediated glucocorticoid signaling pathway;GO:0099576 regulation of protein catabolic process at postsynapse, modulating synaptic transmission		0.0	0.0	0.0	0.0	0.0	0.0	1.0	0.0	0.0	0.0	1.0	0.0	0.0	0.0	0.0	1.0	0.0	0.0	0.0	0.0
NEDD9	18003	symbol	M. musculus	18003	M. musculus	Nedd9	neural precursor cell expressed, developmentally down-regulated gene 9	GO:2000522 positive regulation of immunological synapse formation;GO:0061523 cilium disassembly;GO:2000520 regulation of immunological synapse formation		0.0	0.0	0.0	1.0	0.0	0.0	0.0	1.0	0.0	0.0	1.0	0.0	0.0	0.0	0.0	0.0	0.0	0.0	0.0	0.0
NEURL1B	240055	symbol	M. musculus	240055	M. musculus	Neurl1b	neuralized E3 ubiquitin protein ligase 1B	GO:0070086 ubiquitin-dependent endocytosis;GO:0007219 Notch signaling pathway;GO:0072594 establishment of protein localization to organelle		0.0	0.0	0.0	0.0	0.0	0.0	1.0	0.0	0.0	0.0	0.0	0.0	0.0	0.0	0.0	0.0	0.0	0.0	0.0	0.0
NFKBIA	18035	symbol	M. musculus	18035	M. musculus	Nfkbia	nuclear factor of kappa light polypeptide gene enhancer in B cells inhibitor, alpha	GO:0007253 cytoplasmic sequestering of NF-kappaB;GO:0070427 nucleotide-binding oligomerization domain containing 1 signaling pathway;GO:0042994 cytoplasmic sequestering of transcription factor		1.0	0.0	0.0	0.0	0.0	0.0	0.0	0.0	0.0	0.0	1.0	0.0	0.0	0.0	0.0	0.0	1.0	0.0	0.0	0.0
NFKBIZ	80859	symbol	M. musculus	80859	M. musculus	Nfkbiz	nuclear factor of kappa light polypeptide gene enhancer in B cells inhibitor, zeta	GO:0032980 keratinocyte activation;GO:1990117 B cell receptor apoptotic signaling pathway;GO:0072718 response to cisplatin		0.0	0.0	0.0	0.0	1.0	1.0	0.0	0.0	0.0	0.0	1.0	1.0	0.0	0.0	0.0	1.0	0.0	0.0	0.0	0.0
NFXL1	100978	symbol	M. musculus	100978	M. musculus	Nfxl1	nuclear transcription factor, X-box binding-like 1	GO:0006355 regulation of DNA-templated transcription;GO:2001141 regulation of RNA biosynthetic process;GO:0051252 regulation of RNA metabolic process		0.0	0.0	0.0	0.0	0.0	0.0	0.0	0.0	0.0	0.0	0.0	0.0	0.0	0.0	0.0	0.0	0.0	0.0	0.0	0.0
NIN	18080	symbol	M. musculus	18080	M. musculus	Nin	ninein	GO:0090222 centrosome-templated microtubule nucleation;GO:0051418 microtubule nucleation by microtubule organizing center;GO:0021540 corpus callosum morphogenesis		0.0	0.0	0.0	0.0	0.0	0.0	0.0	0.0	0.0	0.0	0.0	0.0	0.0	0.0	0.0	0.0	0.0	0.0	0.0	0.0
NINJ1	18081	symbol	M. musculus	18081	M. musculus	Ninj1	ninjurin 1	GO:1905351 pericyte cell migration;GO:2001206 positive regulation of osteoclast development;GO:0002232 leukocyte chemotaxis involved in inflammatory response		0.0	0.0	0.0	1.0	1.0	0.0	0.0	1.0	0.0	0.0	1.0	0.0	0.0	0.0	0.0	0.0	0.0	0.0	0.0	0.0
NLRC4	268973	symbol	M. musculus	268973	M. musculus	Nlrc4	NLR family, CARD domain containing 4	GO:0097202 activation of cysteine-type endopeptidase activity;GO:0016045 detection of bacterium;GO:0098543 detection of other organism		0.0	0.0	0.0	0.0	1.0	0.0	0.0	0.0	1.0	0.0	1.0	1.0	0.0	0.0	1.0	0.0	0.0	0.0	0.0	0.0
NLRC5	434341	symbol	M. musculus	434341	M. musculus	Nlrc5	NLR family, CARD domain containing 5	GO:0045345 positive regulation of MHC class I biosynthetic process;GO:0045343 regulation of MHC class I biosynthetic process;GO:0060332 positive regulation of response to type II interferon		0.0	0.0	0.0	0.0	0.0	0.0	0.0	0.0	0.0	0.0	1.0	0.0	0.0	0.0	0.0	0.0	0.0	0.0	0.0	0.0
NME4	56520	symbol	M. musculus	56520	M. musculus	Nme4	NME/NM23 nucleoside diphosphate kinase 4	GO:0006228 UTP biosynthetic process;GO:0046051 UTP metabolic process;GO:0006183 GTP biosynthetic process	yes	0.0	0.0	0.0	0.0	0.0	0.0	0.0	0.0	0.0	0.0	0.0	0.0	0.0	1.0	0.0	0.0	0.0	0.0	1.0	0.0
NMT2	18108	symbol	M. musculus	18108	M. musculus	Nmt2	N-myristoyltransferase 2	GO:0018008 N-terminal peptidyl-glycine N-myristoylation;GO:0018201 peptidyl-glycine modification;GO:0006499 N-terminal protein myristoylation		0.0	0.0	0.0	0.0	0.0	0.0	0.0	0.0	0.0	0.0	0.0	0.0	0.0	0.0	0.0	0.0	0.0	0.0	0.0	0.0
NOP10	66181	symbol	M. musculus	66181	M. musculus	Nop10	NOP10 ribonucleoprotein	GO:0031120 snRNA pseudouridine synthesis;GO:0000454 snoRNA guided rRNA pseudouridine synthesis;GO:0031118 rRNA pseudouridine synthesis		1.0	0.0	0.0	0.0	0.0	0.0	0.0	0.0	0.0	0.0	0.0	0.0	0.0	0.0	0.0	0.0	0.0	0.0	0.0	0.0
NOTCH1	18128	symbol	M. musculus	18128	M. musculus	Notch1	notch 1	GO:0003178 coronary sinus valve development;GO:0003182 coronary sinus valve morphogenesis;GO:0003270 Notch signaling pathway involved in regulation of secondary heart field cardioblast proliferation		0.0	0.0	0.0	0.0	1.0	1.0	0.0	1.0	0.0	0.0	0.0	1.0	0.0	0.0	0.0	1.0	0.0	1.0	0.0	0.0
NT5C	50773	symbol	M. musculus	50773	M. musculus	Nt5c	5',3'-nucleotidase, cytosolic	GO:0046050 UMP catabolic process;GO:0046074 dTMP catabolic process;GO:0046079 dUMP catabolic process		0.0	0.0	0.0	0.0	0.0	0.0	0.0	0.0	0.0	0.0	0.0	0.0	0.0	0.0	0.0	0.0	0.0	0.0	1.0	0.0
NT5C3B	68106	symbol	M. musculus	68106	M. musculus	Nt5c3b	5'-nucleotidase, cytosolic IIIB	GO:0009117 nucleotide metabolic process;GO:0006753 nucleoside phosphate metabolic process;GO:0055086 nucleobase-containing small molecule metabolic process		1.0	0.0	0.0	0.0	0.0	0.0	0.0	0.0	0.0	0.0	0.0	0.0	0.0	0.0	0.0	0.0	0.0	0.0	1.0	0.0
NT5E	23959	symbol	M. musculus	23959	M. musculus	Nt5e	5' nucleotidase, ecto	GO:0046086 adenosine biosynthetic process;GO:0006196 AMP catabolic process;GO:0042451 purine nucleoside biosynthetic process		0.0	0.0	0.0	0.0	0.0	0.0	0.0	0.0	0.0	0.0	0.0	0.0	0.0	0.0	0.0	0.0	0.0	0.0	1.0	0.0
NTHL1	18207	symbol	M. musculus	18207	M. musculus	Nthl1	nth (endonuclease III)-like 1 (E.coli)	GO:0006285 base-excision repair, AP site formation;GO:0006284 base-excision repair;GO:0006289 nucleotide-excision repair		0.0	0.0	0.0	0.0	0.0	0.0	0.0	0.0	0.0	0.0	0.0	0.0	0.0	0.0	0.0	0.0	0.0	0.0	0.0	0.0
NTPCR	66566	symbol	M. musculus	66566	M. musculus	Ntpcr	nucleoside-triphosphatase, cancer-related	GO:0008150 biological_process		0.0	0.0	0.0	0.0	0.0	0.0	0.0	0.0	0.0	0.0	0.0	0.0	0.0	0.0	0.0	0.0	0.0	0.0	0.0	0.0
NUAK2	74137	symbol	M. musculus	74137	M. musculus	Nuak2	NUAK family, SNF1-like kinase, 2	GO:0035330 regulation of hippo signaling;GO:0042149 cellular response to glucose starvation;GO:0009267 cellular response to starvation	yes	0.0	0.0	0.0	0.0	0.0	0.0	0.0	0.0	0.0	0.0	0.0	0.0	0.0	0.0	0.0	0.0	0.0	0.0	0.0	0.0
NUBP2	26426	symbol	M. musculus	26426	M. musculus	Nubp2	nucleotide binding protein 2	GO:0016226 iron-sulfur cluster assembly;GO:0031163 metallo-sulfur cluster assembly;GO:0030030 cell projection organization		0.0	0.0	0.0	0.0	0.0	0.0	0.0	0.0	0.0	0.0	0.0	0.0	0.0	0.0	0.0	0.0	0.0	0.0	0.0	0.0
NUDT16L1	66911	symbol	M. musculus	66911	M. musculus	Nudt16l1	nudix hydrolase 16 like 1	GO:2001033 negative regulation of double-strand break repair via nonhomologous end joining;GO:2001032 regulation of double-strand break repair via nonhomologous end joining;GO:2000780 negative regulation of double-strand break repair		0.0	0.0	0.0	0.0	0.0	0.0	0.0	0.0	0.0	0.0	0.0	0.0	0.0	0.0	0.0	0.0	0.0	0.0	0.0	0.0
NUDT6	229228	symbol	M. musculus	229228	M. musculus	Nudt6	nudix hydrolase 6	GO:0045786 negative regulation of cell cycle;GO:0008285 negative regulation of cell population proliferation;GO:0051726 regulation of cell cycle		0.0	0.0	0.0	0.0	0.0	0.0	0.0	0.0	0.0	0.0	0.0	0.0	0.0	0.0	0.0	0.0	0.0	0.0	0.0	0.0
NUP210	54563	symbol	M. musculus	54563	M. musculus	Nup210	nucleoporin 210	GO:0051028 mRNA transport;GO:0050657 nucleic acid transport;GO:0050658 RNA transport		1.0	0.0	0.0	0.0	0.0	0.0	0.0	0.0	0.0	1.0	0.0	0.0	0.0	0.0	0.0	0.0	0.0	0.0	0.0	0.0
NYNRIN	277154	symbol	M. musculus	277154	M. musculus	Nynrin	NYN domain and retroviral integrase containing	GO:0015074 DNA integration;GO:0006259 DNA metabolic process;GO:0090304 nucleic acid metabolic process		0.0	0.0	0.0	0.0	0.0	0.0	0.0	0.0	0.0	0.0	0.0	0.0	0.0	0.0	0.0	0.0	0.0	0.0	0.0	0.0
OCEL1	77090	symbol	M. musculus	77090	M. musculus	Ocel1	occludin/ELL domain containing 1	GO:0070830 bicellular tight junction assembly;GO:0120192 tight junction assembly;GO:0120193 tight junction organization		0.0	0.0	0.0	0.0	0.0	0.0	0.0	0.0	0.0	0.0	0.0	0.0	0.0	0.0	0.0	0.0	0.0	0.0	0.0	0.0
OCRL	320634	symbol	M. musculus	320634	M. musculus	Ocrl	OCRL, inositol polyphosphate-5-phosphatase	GO:0046856 phosphatidylinositol dephosphorylation;GO:0046839 phospholipid dephosphorylation;GO:0046488 phosphatidylinositol metabolic process		0.0	0.0	0.0	0.0	0.0	0.0	0.0	0.0	0.0	0.0	0.0	0.0	0.0	0.0	0.0	0.0	0.0	0.0	0.0	0.0
OLFM1	56177	symbol	M. musculus	56177	M. musculus	Olfm1	olfactomedin 1	GO:0023041 neuronal signal transduction;GO:0030516 regulation of axon extension;GO:0061387 regulation of extent of cell growth		0.0	0.0	0.0	0.0	0.0	0.0	0.0	0.0	0.0	0.0	0.0	1.0	0.0	0.0	0.0	0.0	0.0	0.0	0.0	0.0
OSBPL3	71720	symbol	M. musculus	71720	M. musculus	Osbpl3	oxysterol binding protein-like 3	GO:0006869 lipid transport;GO:0010876 lipid localization;GO:0033036 macromolecule localization		0.0	0.0	0.0	0.0	0.0	0.0	0.0	0.0	0.0	0.0	0.0	0.0	0.0	1.0	0.0	0.0	0.0	0.0	0.0	0.0
OSGIN1	71839	symbol	M. musculus	71839	M. musculus	Osgin1	oxidative stress induced growth inhibitor 1	GO:0030308 negative regulation of cell growth;GO:0045926 negative regulation of growth;GO:0001558 regulation of cell growth		0.0	0.0	0.0	0.0	0.0	0.0	0.0	0.0	0.0	0.0	0.0	0.0	0.0	0.0	0.0	0.0	0.0	0.0	0.0	0.0
OSM	18413	symbol	M. musculus	18413	M. musculus	Osm	oncostatin M	GO:0038165 oncostatin-M-mediated signaling pathway;GO:0045835 negative regulation of meiotic nuclear division;GO:0007260 tyrosine phosphorylation of STAT protein		0.0	0.0	0.0	0.0	0.0	0.0	0.0	0.0	1.0	0.0	1.0	1.0	0.0	0.0	0.0	0.0	0.0	1.0	0.0	0.0
OTUD6B	72201	symbol	M. musculus	72201	M. musculus	Otud6b	OTU domain containing 6B	GO:0043248 proteasome assembly;GO:0016579 protein deubiquitination;GO:0070646 protein modification by small protein removal		0.0	0.0	0.0	0.0	0.0	0.0	0.0	0.0	0.0	0.0	0.0	0.0	0.0	0.0	0.0	0.0	0.0	0.0	0.0	0.0
P2RX4	18438	symbol	M. musculus	18438	M. musculus	P2rx4	purinergic receptor P2X, ligand-gated ion channel 4	GO:0050975 sensory perception of touch;GO:1904141 positive regulation of microglial cell migration;GO:1904139 regulation of microglial cell migration		0.0	0.0	0.0	0.0	0.0	0.0	0.0	1.0	0.0	0.0	1.0	1.0	0.0	0.0	0.0	0.0	0.0	0.0	0.0	0.0
P4HB	18453	symbol	M. musculus	18453	M. musculus	P4hb	prolyl 4-hydroxylase, beta polypeptide	GO:0034975 protein folding in endoplasmic reticulum;GO:0030070 insulin processing;GO:0018401 peptidyl-proline hydroxylation to 4-hydroxy-L-proline		0.0	0.0	1.0	0.0	0.0	0.0	0.0	0.0	0.0	1.0	0.0	0.0	0.0	0.0	0.0	0.0	0.0	0.0	0.0	0.0
PABPN1	54196	symbol	M. musculus	54196	M. musculus	Pabpn1	poly(A) binding protein, nuclear 1	GO:1904247 positive regulation of polynucleotide adenylyltransferase activity;GO:1904245 regulation of polynucleotide adenylyltransferase activity;GO:0031440 regulation of mRNA 3'-end processing		1.0	0.0	0.0	0.0	0.0	0.0	0.0	0.0	0.0	0.0	0.0	0.0	0.0	0.0	0.0	0.0	1.0	0.0	0.0	0.0
PADI2	18600	symbol	M. musculus	18600	M. musculus	Padi2	peptidyl arginine deiminase, type II	GO:1901624 negative regulation of lymphocyte chemotaxis;GO:0070100 negative regulation of chemokine-mediated signaling pathway;GO:0070099 regulation of chemokine-mediated signaling pathway		0.0	1.0	0.0	0.0	0.0	0.0	0.0	1.0	0.0	0.0	1.0	0.0	0.0	0.0	0.0	0.0	0.0	0.0	0.0	0.0
PAM	18484	symbol	M. musculus	18484	M. musculus	Pam	peptidylglycine alpha-amidating monooxygenase	GO:0001519 peptide amidation;GO:0062112 fatty acid primary amide biosynthetic process;GO:0062126 fatty acid primary amide metabolic process		0.0	0.0	0.0	0.0	0.0	0.0	0.0	0.0	0.0	0.0	0.0	0.0	0.0	0.0	0.0	0.0	0.0	0.0	0.0	0.0
PAOX	212503	symbol	M. musculus	212503	M. musculus	Paox	polyamine oxidase (exo-N4-amino)	GO:0009447 putrescine catabolic process;GO:0010967 regulation of polyamine biosynthetic process;GO:1901304 regulation of spermidine biosynthetic process		0.0	0.0	0.0	0.0	0.0	0.0	0.0	0.0	0.0	0.0	0.0	0.0	0.0	0.0	0.0	0.0	0.0	0.0	0.0	0.0
PARP4	328417	symbol	M. musculus	328417	M. musculus	Parp4	poly (ADP-ribose) polymerase family, member 4	GO:0051972 regulation of telomerase activity;GO:2000278 regulation of DNA biosynthetic process;GO:0051052 regulation of DNA metabolic process		0.0	0.0	0.0	0.0	1.0	0.0	0.0	0.0	0.0	0.0	0.0	0.0	0.0	0.0	0.0	0.0	0.0	0.0	0.0	0.0
PARP6	67287	symbol	M. musculus	67287	M. musculus	Parp6	poly (ADP-ribose) polymerase family, member 6	GO:0070213 protein auto-ADP-ribosylation;GO:0030968 endoplasmic reticulum unfolded protein response;GO:0050775 positive regulation of dendrite morphogenesis		0.0	0.0	0.0	0.0	0.0	0.0	0.0	0.0	0.0	0.0	0.0	0.0	0.0	0.0	0.0	0.0	0.0	0.0	0.0	0.0
PAXX	227622	symbol	M. musculus	227622	M. musculus	Paxx	non-homologous end joining factor	GO:0006303 double-strand break repair via nonhomologous end joining;GO:0006302 double-strand break repair;GO:0006281 DNA repair		0.0	0.0	0.0	0.0	0.0	0.0	0.0	0.0	0.0	0.0	0.0	0.0	0.0	0.0	0.0	0.0	0.0	0.0	0.0	0.0
PBXIP1	229534	symbol	M. musculus	229534	M. musculus	Pbxip1	pre B cell leukemia transcription factor interacting protein 1	GO:2001106 regulation of Rho guanyl-nucleotide exchange factor activity;GO:1901148 gene expression involved in extracellular matrix organization;GO:0061975 articular cartilage development		0.0	0.0	0.0	0.0	1.0	0.0	0.0	0.0	0.0	0.0	0.0	0.0	0.0	0.0	0.0	0.0	0.0	0.0	0.0	0.0
PCBP1	23983	symbol	M. musculus	23983	M. musculus	Pcbp1	poly(rC) binding protein 1	GO:0039694 viral RNA genome replication;GO:0019079 viral genome replication;GO:0019058 viral life cycle		1.0	0.0	0.0	0.0	0.0	0.0	0.0	0.0	0.0	0.0	0.0	0.0	0.0	0.0	0.0	0.0	0.0	0.0	0.0	0.0
PCNX1	54604	symbol	M. musculus	54604	M. musculus	Pcnx1	pecanex 1	GO:0008150 biological_process		0.0	0.0	0.0	0.0	0.0	0.0	0.0	0.0	0.0	0.0	0.0	0.0	0.0	0.0	0.0	0.0	0.0	0.0	0.0	0.0
PCYOX1	66881	symbol	M. musculus	66881	M. musculus	Pcyox1	prenylcysteine oxidase 1	GO:0030328 prenylcysteine catabolic process;GO:0030329 prenylcysteine metabolic process;GO:0030327 prenylated protein catabolic process		0.0	0.0	0.0	0.0	0.0	0.0	0.0	0.0	0.0	0.0	0.0	0.0	0.0	0.0	0.0	0.0	0.0	0.0	0.0	0.0
PCYT1A	13026	symbol	M. musculus	13026	M. musculus	Pcyt1a	phosphate cytidylyltransferase 1, choline, alpha isoform	GO:0006657 CDP-choline pathway;GO:0006656 phosphatidylcholine biosynthetic process;GO:0046470 phosphatidylcholine metabolic process		0.0	0.0	0.0	0.0	0.0	0.0	0.0	0.0	0.0	0.0	0.0	0.0	0.0	0.0	0.0	0.0	0.0	0.0	0.0	0.0
PDCD6	18570	symbol	M. musculus	18570	M. musculus	Pdcd6	programmed cell death 6	GO:1902527 positive regulation of protein monoubiquitination;GO:0036324 vascular endothelial growth factor receptor-2 signaling pathway;GO:1902525 regulation of protein monoubiquitination		0.0	0.0	0.0	0.0	0.0	0.0	0.0	1.0	0.0	0.0	0.0	0.0	0.0	0.0	1.0	0.0	0.0	0.0	0.0	0.0
PDE4A	18577	symbol	M. musculus	18577	M. musculus	Pde4a	phosphodiesterase 4A, cAMP specific	GO:0006198 cAMP catabolic process;GO:0141161 regulation of cAMP/PKA signal transduction;GO:0009214 cyclic nucleotide catabolic process		0.0	0.0	0.0	0.0	0.0	0.0	0.0	0.0	0.0	0.0	0.0	0.0	0.0	0.0	0.0	0.0	1.0	0.0	1.0	0.0
PDE4B	18578	symbol	M. musculus	18578	M. musculus	Pde4b	phosphodiesterase 4B, cAMP specific	GO:1901898 negative regulation of relaxation of cardiac muscle;GO:0071878 negative regulation of adenylate cyclase-activating adrenergic receptor signaling pathway;GO:1901078 negative regulation of relaxation of muscle		0.0	0.0	0.0	1.0	0.0	0.0	0.0	0.0	1.0	0.0	1.0	0.0	0.0	0.0	0.0	0.0	1.0	0.0	0.0	0.0
PDE7A	18583	symbol	M. musculus	18583	M. musculus	Pde7a	phosphodiesterase 7A	GO:0019933 cAMP-mediated signaling;GO:0141124 intracellular signaling cassette;GO:0035556 intracellular signal transduction		0.0	0.0	0.0	0.0	0.0	0.0	0.0	0.0	0.0	0.0	0.0	0.0	0.0	0.0	0.0	0.0	1.0	0.0	0.0	0.0
PDE8A	18584	symbol	M. musculus	18584	M. musculus	Pde8a	phosphodiesterase 8A	GO:0071364 cellular response to epidermal growth factor stimulus;GO:0019933 cAMP-mediated signaling;GO:0070849 response to epidermal growth factor		0.0	0.0	0.0	0.0	0.0	0.0	0.0	0.0	0.0	0.0	0.0	0.0	0.0	0.0	0.0	0.0	1.0	0.0	0.0	0.0
PDLIM7	67399	symbol	M. musculus	67399	M. musculus	Pdlim7	PDZ and LIM domain 7	GO:0045669 positive regulation of osteoblast differentiation;GO:0045667 regulation of osteoblast differentiation;GO:0001503 ossification		0.0	0.0	0.0	0.0	0.0	0.0	0.0	0.0	0.0	0.0	0.0	0.0	0.0	0.0	0.0	0.0	0.0	0.0	0.0	0.0
PDPN	14726	symbol	M. musculus	14726	M. musculus	Pdpn	podoplanin	GO:0060838 lymphatic endothelial cell fate commitment;GO:1904328 regulation of myofibroblast contraction;GO:0060836 lymphatic endothelial cell differentiation		0.0	0.0	0.0	0.0	0.0	0.0	0.0	1.0	0.0	0.0	0.0	0.0	0.0	0.0	0.0	0.0	1.0	0.0	0.0	0.0
PDRG1	68559	symbol	M. musculus	68559	M. musculus	Pdrg1	p53 and DNA damage regulated 1	GO:0006457 protein folding;GO:0051604 protein maturation;GO:0010467 gene expression		0.0	0.0	0.0	0.0	0.0	0.0	0.0	0.0	0.0	0.0	0.0	0.0	0.0	0.0	0.0	0.0	0.0	0.0	0.0	0.0
PER1	18626	symbol	M. musculus	18626	M. musculus	Per1	period circadian clock 1	GO:0097167 circadian regulation of translation;GO:2000323 negative regulation of glucocorticoid receptor signaling pathway;GO:2000322 regulation of glucocorticoid receptor signaling pathway		0.0	0.0	0.0	0.0	0.0	0.0	0.0	0.0	0.0	0.0	0.0	0.0	0.0	0.0	0.0	0.0	0.0	0.0	0.0	1.0
PER2	18627	symbol	M. musculus	18627	M. musculus	Per2	period circadian clock 2	GO:0051941 regulation of amino acid uptake involved in synaptic transmission;GO:0051946 regulation of glutamate uptake involved in transmission of nerve impulse;GO:0060567 negative regulation of termination of DNA-templated transcription		0.0	0.0	0.0	0.0	0.0	0.0	0.0	0.0	0.0	0.0	0.0	0.0	0.0	0.0	0.0	0.0	0.0	1.0	1.0	0.0
PFDN5	56612	symbol	M. musculus	56612	M. musculus	Pfdn5	prefoldin 5	GO:1990113 RNA polymerase I assembly;GO:1990115 RNA polymerase III assembly;GO:1990114 RNA polymerase II core complex assembly		0.0	0.0	0.0	0.0	0.0	0.0	0.0	0.0	0.0	0.0	0.0	0.0	0.0	0.0	0.0	0.0	0.0	1.0	0.0	0.0
PFDN6	14976	symbol	M. musculus	14976	M. musculus	Pfdn6	prefoldin subunit 6	GO:1905907 negative regulation of amyloid fibril formation;GO:1905906 regulation of amyloid fibril formation;GO:0051131 chaperone-mediated protein complex assembly		0.0	0.0	0.0	0.0	0.0	0.0	0.0	0.0	0.0	0.0	0.0	0.0	0.0	0.0	0.0	0.0	0.0	1.0	0.0	0.0
PFKL	18641	symbol	M. musculus	18641	M. musculus	Pfkl	phosphofructokinase, liver, B-type	GO:0030388 fructose 1,6-bisphosphate metabolic process;GO:0006002 fructose 6-phosphate metabolic process;GO:0006735 NADH regeneration	yes	0.0	1.0	0.0	0.0	0.0	0.0	0.0	0.0	0.0	0.0	0.0	0.0	0.0	0.0	0.0	0.0	0.0	0.0	1.0	0.0
PFKM	18642	symbol	M. musculus	18642	M. musculus	Pfkm	phosphofructokinase, muscle	GO:0093001 glycolysis from storage polysaccharide through glucose-1-phosphate;GO:0061622 glycolytic process through glucose-1-phosphate;GO:0030388 fructose 1,6-bisphosphate metabolic process	yes	0.0	0.0	0.0	0.0	0.0	0.0	0.0	0.0	0.0	0.0	0.0	0.0	0.0	0.0	0.0	0.0	0.0	0.0	1.0	0.0
PGAP1	241062	symbol	M. musculus	241062	M. musculus	Pgap1	post-GPI attachment to proteins 1	GO:1902953 positive regulation of ER to Golgi vesicle-mediated transport;GO:0060628 regulation of ER to Golgi vesicle-mediated transport;GO:0021871 forebrain regionalization		0.0	0.0	0.0	0.0	0.0	0.0	0.0	0.0	0.0	0.0	0.0	0.0	0.0	0.0	0.0	0.0	0.0	0.0	0.0	0.0
PGGHG	212974	symbol	M. musculus	212974	M. musculus	Pgghg	protein glucosylgalactosylhydroxylysine glucosidase	GO:0005975 carbohydrate metabolic process;GO:0044238 primary metabolic process;GO:0008152 metabolic process		0.0	0.0	0.0	0.0	0.0	0.0	0.0	0.0	0.0	0.0	0.0	0.0	0.0	0.0	0.0	0.0	0.0	0.0	1.0	0.0
PHC2	54383	symbol	M. musculus	54383	M. musculus	Phc2	polyhomeotic 2	GO:0007283 spermatogenesis;GO:0048232 male gamete generation;GO:0007276 gamete generation		0.0	0.0	0.0	0.0	0.0	0.0	0.0	0.0	0.0	0.0	0.0	0.0	0.0	0.0	0.0	0.0	0.0	0.0	0.0	0.0
PHLDA1	21664	symbol	M. musculus	21664	M. musculus	Phlda1	pleckstrin homology like domain, family A, member 1	GO:0045210 FasL biosynthetic process;GO:0009101 glycoprotein biosynthetic process;GO:0009100 glycoprotein metabolic process		0.0	0.0	0.0	0.0	0.0	0.0	0.0	0.0	0.0	0.0	0.0	1.0	0.0	0.0	0.0	0.0	0.0	0.0	0.0	0.0
PID1	98496	symbol	M. musculus	98496	M. musculus	Pid1	phosphotyrosine interaction domain containing 1	GO:2001170 negative regulation of ATP biosynthetic process;GO:0030809 negative regulation of nucleotide biosynthetic process;GO:1900372 negative regulation of purine nucleotide biosynthetic process		0.0	0.0	0.0	0.0	0.0	0.0	0.0	0.0	0.0	0.0	0.0	0.0	0.0	0.0	0.0	0.0	0.0	0.0	0.0	0.0
PIGS	276846	symbol	M. musculus	276846	M. musculus	Pigs	phosphatidylinositol glycan anchor biosynthesis, class S	GO:0016255 attachment of GPI anchor to protein;GO:0006506 GPI anchor biosynthetic process;GO:0006505 GPI anchor metabolic process		0.0	0.0	0.0	0.0	0.0	0.0	0.0	0.0	0.0	0.0	0.0	0.0	0.0	0.0	0.0	0.0	0.0	0.0	0.0	0.0
PIGT	78928	symbol	M. musculus	78928	M. musculus	Pigt	phosphatidylinositol glycan anchor biosynthesis, class T	GO:0016255 attachment of GPI anchor to protein;GO:0006506 GPI anchor biosynthetic process;GO:0006505 GPI anchor metabolic process		0.0	0.0	0.0	0.0	0.0	0.0	0.0	0.0	0.0	0.0	0.0	0.0	0.0	0.0	0.0	0.0	0.0	0.0	0.0	0.0
PIM1	18712	symbol	M. musculus	18712	M. musculus	Pim1	proviral integration site 1	GO:1905062 positive regulation of cardioblast proliferation;GO:0070561 vitamin D receptor signaling pathway;GO:0071305 cellular response to vitamin D	yes	0.0	0.0	0.0	0.0	0.0	0.0	0.0	0.0	0.0	0.0	1.0	0.0	0.0	0.0	0.0	0.0	0.0	0.0	0.0	0.0
PIP5K1C	18717	symbol	M. musculus	18717	M. musculus	Pip5k1c	phosphatidylinositol-4-phosphate 5-kinase, type 1 gamma	GO:1900242 regulation of synaptic vesicle endocytosis;GO:0070527 platelet aggregation;GO:0099149 regulation of postsynaptic neurotransmitter receptor internalization	yes	0.0	0.0	0.0	1.0	0.0	0.0	1.0	0.0	0.0	0.0	0.0	0.0	0.0	0.0	0.0	0.0	0.0	0.0	0.0	0.0
PISD	320951	symbol	M. musculus	320951	M. musculus	Pisd	phosphatidylserine decarboxylase	GO:0035694 mitochondrial protein catabolic process;GO:0006646 phosphatidylethanolamine biosynthetic process;GO:0140042 lipid droplet formation		0.0	0.0	0.0	0.0	0.0	0.0	0.0	0.0	0.0	0.0	0.0	0.0	0.0	1.0	0.0	0.0	0.0	0.0	0.0	0.0
PITPNM1	18739	symbol	M. musculus	18739	M. musculus	Pitpnm1	phosphatidylinositol transfer protein, membrane-associated 1	GO:0015914 phospholipid transport;GO:0015748 organophosphate ester transport;GO:0006869 lipid transport		0.0	0.0	0.0	0.0	0.0	0.0	0.0	0.0	0.0	0.0	0.0	0.0	0.0	1.0	0.0	0.0	0.0	0.0	0.0	0.0
PLA2G2D	18782	symbol	M. musculus	18782	M. musculus	Pla2g2d	phospholipase A2, group IID	GO:0002361 CD4-positive, CD25-positive, alpha-beta regulatory T cell differentiation;GO:0045066 regulatory T cell differentiation;GO:0002864 regulation of acute inflammatory response to antigenic stimulus		0.0	0.0	0.0	0.0	1.0	0.0	0.0	0.0	0.0	0.0	0.0	0.0	0.0	1.0	0.0	1.0	0.0	0.0	0.0	0.0
PLA2G7	27226	symbol	M. musculus	27226	M. musculus	Pla2g7	phospholipase A2, group VII (platelet-activating factor acetylhydrolase, plasma)	GO:0034441 plasma lipoprotein particle oxidation;GO:0044269 glycerol ether catabolic process;GO:0062234 platelet activating factor catabolic process		0.0	0.0	0.0	0.0	1.0	0.0	0.0	1.0	0.0	0.0	1.0	0.0	0.0	0.0	0.0	0.0	0.0	0.0	1.0	0.0
PLAUR	18793	symbol	M. musculus	18793	M. musculus	Plaur	plasminogen activator, urokinase receptor	GO:0038195 urokinase plasminogen activator signaling pathway;GO:2001268 negative regulation of cysteine-type endopeptidase activity involved in apoptotic signaling pathway;GO:0051917 regulation of fibrinolysis		0.0	1.0	0.0	0.0	0.0	0.0	0.0	0.0	0.0	0.0	0.0	0.0	0.0	0.0	1.0	0.0	0.0	0.0	0.0	0.0
PLBD1	66857	symbol	M. musculus	66857	M. musculus	Plbd1	phospholipase B domain containing 1	GO:0009395 phospholipid catabolic process;GO:0046434 organophosphate catabolic process;GO:0044242 cellular lipid catabolic process		0.0	0.0	0.0	0.0	0.0	0.0	0.0	0.0	0.0	0.0	0.0	0.0	0.0	0.0	0.0	0.0	0.0	0.0	1.0	0.0
PLD2	18806	symbol	M. musculus	18806	M. musculus	Pld2	phospholipase D2	GO:0002031 G protein-coupled receptor internalization;GO:0006654 phosphatidic acid biosynthetic process;GO:0002029 desensitization of G protein-coupled receptor signaling pathway		0.0	0.0	0.0	0.0	0.0	0.0	1.0	1.0	0.0	0.0	0.0	0.0	0.0	0.0	0.0	0.0	0.0	0.0	1.0	0.0
PLEC	18810	symbol	M. musculus	18810	M. musculus	Plec	plectin	GO:0002522 leukocyte migration involved in immune response;GO:2000983 regulation of ATP citrate synthase activity;GO:0071464 cellular response to hydrostatic pressure		0.0	0.0	0.0	1.0	0.0	0.0	0.0	0.0	0.0	0.0	0.0	0.0	0.0	0.0	0.0	1.0	0.0	0.0	1.0	0.0
PLEKHA5	109135	symbol	M. musculus	109135	M. musculus	Plekha5	pleckstrin homology domain containing, family A member 5	GO:0061458 reproductive system development;GO:0048731 system development;GO:0007275 multicellular organism development		0.0	0.0	0.0	0.0	0.0	0.0	0.0	0.0	0.0	0.0	0.0	0.0	0.0	0.0	0.0	0.0	0.0	0.0	0.0	0.0
PLEKHB2	226971	symbol	M. musculus	226971	M. musculus	Plekhb2	pleckstrin homology domain containing, family B (evectins) member 2	GO:0045595 regulation of cell differentiation;GO:0050793 regulation of developmental process;GO:0050794 regulation of cellular process		0.0	0.0	0.0	0.0	0.0	0.0	0.0	0.0	0.0	0.0	0.0	0.0	0.0	0.0	0.0	0.0	0.0	0.0	0.0	0.0
PLEKHG3	263406	symbol	M. musculus	263406	M. musculus	Plekhg3	pleckstrin homology domain containing, family G (with RhoGef domain) member 3	GO:2000114 regulation of establishment of cell polarity;GO:0032878 regulation of establishment or maintenance of cell polarity;GO:0030334 regulation of cell migration		0.0	0.0	0.0	0.0	0.0	0.0	0.0	0.0	0.0	0.0	0.0	0.0	0.0	0.0	0.0	0.0	0.0	0.0	0.0	0.0
PLEKHG5	269608	symbol	M. musculus	269608	M. musculus	Plekhg5	pleckstrin homology domain containing, family G (with RhoGef domain) member 5	GO:0140251 regulation protein catabolic process at presynapse;GO:0035767 endothelial cell chemotaxis;GO:0140250 regulation protein catabolic process at synapse		0.0	0.0	0.0	1.0	0.0	0.0	0.0	0.0	0.0	0.0	0.0	0.0	0.0	0.0	0.0	0.0	1.0	0.0	0.0	0.0
PLEKHO2	102595	symbol	M. musculus	102595	M. musculus	Plekho2	pleckstrin homology domain containing, family O member 2	GO:0071888 macrophage apoptotic process;GO:0006925 inflammatory cell apoptotic process;GO:0033028 myeloid cell apoptotic process		0.0	1.0	0.0	0.0	0.0	0.0	0.0	0.0	0.0	0.0	0.0	0.0	0.0	0.0	0.0	0.0	0.0	0.0	0.0	0.0
PLIN2	11520	symbol	M. musculus	11520	M. musculus	Plin2	perilipin 2	GO:1905691 lipid droplet disassembly;GO:0010890 positive regulation of sequestering of triglyceride;GO:0010889 regulation of sequestering of triglyceride		0.0	0.0	0.0	0.0	0.0	0.0	0.0	0.0	0.0	0.0	0.0	0.0	0.0	1.0	0.0	0.0	0.0	0.0	0.0	0.0
PLIN3	66905	symbol	M. musculus	66905	M. musculus	Plin3	perilipin 3	GO:1905691 lipid droplet disassembly;GO:0010890 positive regulation of sequestering of triglyceride;GO:0010889 regulation of sequestering of triglyceride		0.0	0.0	0.0	0.0	0.0	0.0	0.0	0.0	0.0	0.0	0.0	0.0	0.0	1.0	0.0	0.0	0.0	0.0	0.0	0.0
PLK3	12795	symbol	M. musculus	12795	M. musculus	Plk3	polo like kinase 3	GO:1904716 positive regulation of chaperone-mediated autophagy;GO:2000777 positive regulation of proteasomal ubiquitin-dependent protein catabolic process involved in cellular response to hypoxia;GO:1904714 regulation of chaperone-mediated autophagy		0.0	0.0	0.0	0.0	0.0	0.0	0.0	0.0	1.0	0.0	0.0	0.0	0.0	0.0	1.0	0.0	1.0	0.0	0.0	0.0
PLPP2	50784	symbol	M. musculus	50784	M. musculus	Plpp2	phospholipid phosphatase 2	GO:0006670 sphingosine metabolic process;GO:0046519 sphingoid metabolic process;GO:0034311 diol metabolic process		0.0	0.0	0.0	0.0	0.0	0.0	0.0	0.0	0.0	0.0	0.0	0.0	0.0	0.0	0.0	0.0	0.0	0.0	0.0	0.0
PLPP5	71910	symbol	M. musculus	71910	M. musculus	Plpp5	phospholipid phosphatase 5	GO:0046839 phospholipid dephosphorylation;GO:0030258 lipid modification;GO:0016311 dephosphorylation		0.0	0.0	0.0	0.0	0.0	0.0	0.0	0.0	0.0	0.0	0.0	0.0	0.0	0.0	0.0	0.0	0.0	0.0	0.0	0.0
PLTP	18830	symbol	M. musculus	18830	M. musculus	Pltp	phospholipid transfer protein	GO:0010189 vitamin E biosynthetic process;GO:0042360 vitamin E metabolic process;GO:0046836 glycolipid transport		0.0	0.0	1.0	0.0	0.0	0.0	0.0	0.0	0.0	0.0	0.0	0.0	0.0	1.0	0.0	0.0	0.0	0.0	0.0	0.0
PLXND1	67784	symbol	M. musculus	67784	M. musculus	Plxnd1	plexin D1	GO:0008039 synaptic target recognition;GO:0060666 dichotomous subdivision of terminal units involved in salivary gland branching;GO:0060600 dichotomous subdivision of an epithelial terminal unit		0.0	0.0	0.0	0.0	0.0	0.0	0.0	0.0	0.0	0.0	0.0	0.0	0.0	0.0	0.0	0.0	0.0	0.0	0.0	0.0
POLA2	18969	symbol	M. musculus	18969	M. musculus	Pola2	polymerase (DNA directed), alpha 2	GO:0006269 DNA replication, synthesis of primer;GO:0006270 DNA replication initiation;GO:0006606 protein import into nucleus		0.0	0.0	0.0	0.0	0.0	0.0	0.0	0.0	0.0	0.0	0.0	0.0	0.0	0.0	0.0	0.0	0.0	0.0	0.0	0.0
POLG	18975	symbol	M. musculus	18975	M. musculus	Polg	polymerase (DNA directed), gamma	GO:0045004 DNA replication proofreading;GO:0006264 mitochondrial DNA replication;GO:0032042 mitochondrial DNA metabolic process		0.0	0.0	0.0	0.0	0.0	0.0	0.0	0.0	0.0	0.0	0.0	0.0	0.0	0.0	0.0	0.0	0.0	0.0	0.0	0.0
POLM	54125	symbol	M. musculus	54125	M. musculus	Polm	polymerase (DNA directed), mu	GO:0016446 somatic hypermutation of immunoglobulin genes;GO:0002566 somatic diversification of immune receptors via somatic mutation;GO:0006303 double-strand break repair via nonhomologous end joining		0.0	0.0	0.0	0.0	0.0	1.0	0.0	0.0	0.0	0.0	0.0	0.0	0.0	0.0	0.0	1.0	0.0	0.0	0.0	0.0
PPARGC1B	170826	symbol	M. musculus	170826	M. musculus	Ppargc1b	peroxisome proliferative activated receptor, gamma, coactivator 1 beta	GO:0010694 positive regulation of alkaline phosphatase activity;GO:0010692 regulation of alkaline phosphatase activity;GO:0060346 bone trabecula formation		0.0	0.0	0.0	0.0	0.0	0.0	0.0	0.0	0.0	0.0	1.0	0.0	0.0	0.0	0.0	0.0	0.0	0.0	0.0	0.0
PPCDC	66812	symbol	M. musculus	66812	M. musculus	Ppcdc	phosphopantothenoylcysteine decarboxylase	GO:0015937 coenzyme A biosynthetic process;GO:0015936 coenzyme A metabolic process;GO:0033866 nucleoside bisphosphate biosynthetic process		0.0	0.0	0.0	0.0	0.0	0.0	0.0	0.0	0.0	0.0	0.0	0.0	0.0	0.0	0.0	0.0	0.0	0.0	1.0	0.0
PPIH	66101	symbol	M. musculus	66101	M. musculus	Ppih	peptidyl prolyl isomerase H	GO:0000413 protein peptidyl-prolyl isomerization;GO:0045070 positive regulation of viral genome replication;GO:0018208 peptidyl-proline modification		1.0	0.0	0.0	0.0	0.0	0.0	0.0	0.0	0.0	0.0	0.0	0.0	0.0	0.0	0.0	0.0	0.0	0.0	0.0	0.0
PPP1R1B	19049	symbol	M. musculus	19049	M. musculus	Ppp1r1b	protein phosphatase 1, regulatory inhibitor subunit 1B	GO:0007621 negative regulation of female receptivity;GO:0071314 cellular response to cocaine;GO:0045924 regulation of female receptivity		0.0	0.0	0.0	0.0	0.0	0.0	0.0	0.0	0.0	0.0	0.0	0.0	0.0	0.0	0.0	0.0	0.0	0.0	0.0	0.0
PPP1R21	73825	symbol	M. musculus	73825	M. musculus	Ppp1r21	protein phosphatase 1, regulatory subunit 21	GO:0008150 biological_process		0.0	0.0	0.0	0.0	0.0	0.0	0.0	0.0	0.0	0.0	0.0	0.0	0.0	0.0	0.0	0.0	0.0	0.0	0.0	0.0
PPP1R37	232947	symbol	M. musculus	232947	M. musculus	Ppp1r37	protein phosphatase 1, regulatory subunit 37			0.0	0.0	0.0	0.0	0.0	0.0	0.0	0.0	0.0	0.0	0.0	0.0	0.0	0.0	0.0	0.0	0.0	0.0	0.0	0.0
PPP4C	56420	symbol	M. musculus	56420	M. musculus	Ppp4c	protein phosphatase 4, catalytic subunit	GO:0010569 regulation of double-strand break repair via homologous recombination;GO:0000724 double-strand break repair via homologous recombination;GO:0000725 recombinational repair		0.0	0.0	0.0	0.0	0.0	0.0	0.0	0.0	0.0	0.0	0.0	0.0	0.0	0.0	0.0	0.0	0.0	0.0	0.0	0.0
PPT2	54397	symbol	M. musculus	54397	M. musculus	Ppt2	palmitoyl-protein thioesterase 2			0.0	0.0	0.0	0.0	0.0	0.0	0.0	0.0	0.0	0.0	0.0	0.0	1.0	0.0	0.0	0.0	0.0	0.0	0.0	0.0
PRADC1	73327	symbol	M. musculus	73327	M. musculus	Pradc1	protease-associated domain containing 1	GO:0008150 biological_process		0.0	0.0	0.0	0.0	0.0	0.0	0.0	0.0	0.0	0.0	0.0	0.0	0.0	0.0	0.0	0.0	0.0	0.0	0.0	0.0
PRDX5	54683	symbol	M. musculus	54683	M. musculus	Prdx5	peroxiredoxin 5	GO:0060785 regulation of apoptosis involved in tissue homeostasis;GO:0016480 negative regulation of transcription by RNA polymerase III;GO:0070995 NADPH oxidation		0.0	0.0	0.0	0.0	0.0	0.0	0.0	0.0	0.0	1.0	0.0	0.0	0.0	0.0	0.0	0.0	0.0	0.0	1.0	0.0
PRDX6	11758	symbol	M. musculus	11758	M. musculus	Prdx6	peroxiredoxin 6	GO:0032060 bleb assembly;GO:0042744 hydrogen peroxide catabolic process;GO:0098869 cellular oxidant detoxification		0.0	1.0	0.0	0.0	0.0	0.0	0.0	0.0	0.0	1.0	0.0	0.0	0.0	0.0	0.0	0.0	0.0	0.0	1.0	0.0
PRICKLE3	54630	symbol	M. musculus	54630	M. musculus	Prickle3	prickle planar cell polarity protein 3	GO:0030030 cell projection organization;GO:0007275 multicellular organism development;GO:0016043 cellular component organization		0.0	0.0	0.0	0.0	0.0	0.0	0.0	0.0	0.0	0.0	0.0	0.0	0.0	0.0	0.0	0.0	0.0	0.0	0.0	0.0
PRKAG2	108099	symbol	M. musculus	108099	M. musculus	Prkag2	protein kinase, AMP-activated, gamma 2 non-catalytic subunit	GO:0010800 positive regulation of peptidyl-threonine phosphorylation;GO:0010799 regulation of peptidyl-threonine phosphorylation;GO:0006110 regulation of glycolytic process		0.0	0.0	0.0	0.0	0.0	0.0	0.0	0.0	0.0	0.0	0.0	0.0	0.0	0.0	0.0	0.0	0.0	0.0	1.0	0.0
PRMT3	71974	symbol	M. musculus	71974	M. musculus	Prmt3	protein arginine N-methyltransferase 3	GO:0045827 negative regulation of isoprenoid metabolic process;GO:1900053 negative regulation of retinoic acid biosynthetic process;GO:0019919 peptidyl-arginine methylation, to asymmetrical-dimethyl arginine		0.0	0.0	0.0	0.0	0.0	0.0	0.0	0.0	0.0	0.0	0.0	0.0	0.0	0.0	0.0	0.0	0.0	0.0	0.0	0.0
PRMT7	214572	symbol	M. musculus	214572	M. musculus	Prmt7	protein arginine N-methyltransferase 7	GO:0019919 peptidyl-arginine methylation, to asymmetrical-dimethyl arginine;GO:0035247 peptidyl-arginine omega-N-methylation;GO:0035246 peptidyl-arginine N-methylation		0.0	0.0	0.0	0.0	0.0	0.0	0.0	0.0	0.0	0.0	0.0	0.0	0.0	0.0	0.0	0.0	0.0	0.0	0.0	0.0
PRODH	19125	symbol	M. musculus	19125	M. musculus	Prodh	proline dehydrogenase	GO:0010133 proline catabolic process to glutamate;GO:0006562 proline catabolic process;GO:0006560 proline metabolic process		0.0	0.0	0.0	0.0	0.0	0.0	0.0	0.0	0.0	0.0	0.0	0.0	0.0	0.0	0.0	0.0	0.0	0.0	0.0	0.0
PRSS16	54373	symbol	M. musculus	54373	M. musculus	Prss16	serine protease 16 (thymus)	GO:0006508 proteolysis;GO:0019538 protein metabolic process;GO:1901564 organonitrogen compound metabolic process		0.0	0.0	0.0	0.0	0.0	0.0	0.0	0.0	0.0	0.0	0.0	0.0	0.0	0.0	0.0	0.0	0.0	0.0	0.0	0.0
PRTG	235472	symbol	M. musculus	235472	M. musculus	Prtg	protogenin	GO:0070593 dendrite self-avoidance;GO:0008038 neuron recognition;GO:0007156 homophilic cell adhesion via plasma membrane adhesion molecules		0.0	0.0	0.0	0.0	0.0	0.0	0.0	0.0	0.0	0.0	0.0	0.0	0.0	0.0	0.0	0.0	0.0	0.0	0.0	0.0
PRUNE2	353211	symbol	M. musculus	353211	M. musculus	Prune2	prune homolog 2	GO:0006915 apoptotic process;GO:0012501 programmed cell death;GO:0008219 cell death		0.0	0.0	0.0	0.0	0.0	0.0	0.0	0.0	0.0	0.0	0.0	0.0	0.0	0.0	0.0	0.0	0.0	0.0	0.0	0.0
PSAP	19156	symbol	M. musculus	19156	M. musculus	Psap	prosaposin	GO:1903771 positive regulation of beta-galactosidase activity;GO:1905572 ganglioside GM1 transport to membrane;GO:0006683 galactosylceramide catabolic process		0.0	1.0	0.0	0.0	0.0	0.0	0.0	0.0	0.0	0.0	0.0	0.0	1.0	1.0	0.0	1.0	0.0	0.0	1.0	0.0
PSD3	234353	symbol	M. musculus	234353	M. musculus	Psd3	pleckstrin and Sec7 domain containing 3	GO:0032011 ARF protein signal transduction;GO:0032012 regulation of ARF protein signal transduction;GO:0007264 small GTPase-mediated signal transduction		0.0	0.0	0.0	0.0	0.0	0.0	0.0	0.0	0.0	0.0	0.0	0.0	0.0	0.0	0.0	0.0	1.0	0.0	0.0	0.0
PSD4	215632	symbol	M. musculus	215632	M. musculus	Psd4	pleckstrin and Sec7 domain containing 4	GO:0032012 regulation of ARF protein signal transduction;GO:0051056 regulation of small GTPase mediated signal transduction;GO:1902531 regulation of intracellular signal transduction		0.0	0.0	0.0	0.0	0.0	0.0	0.0	0.0	0.0	0.0	0.0	0.0	0.0	0.0	0.0	0.0	0.0	0.0	0.0	0.0
PSMA6	26443	symbol	M. musculus	26443	M. musculus	Psma6	proteasome subunit alpha 6	GO:0051092 positive regulation of NF-kappaB transcription factor activity;GO:0007519 skeletal muscle tissue development;GO:0060538 skeletal muscle organ development		1.0	0.0	1.0	0.0	0.0	0.0	0.0	0.0	0.0	1.0	0.0	0.0	0.0	0.0	0.0	0.0	0.0	0.0	0.0	0.0
PSMB4	19172	symbol	M. musculus	19172	M. musculus	Psmb4	proteasome (prosome, macropain) subunit, beta type 4	GO:0002862 negative regulation of inflammatory response to antigenic stimulus;GO:0002861 regulation of inflammatory response to antigenic stimulus;GO:0050728 negative regulation of inflammatory response		1.0	0.0	1.0	0.0	0.0	0.0	0.0	0.0	0.0	1.0	0.0	0.0	0.0	0.0	0.0	0.0	0.0	0.0	0.0	0.0
PSMB8	16913	symbol	M. musculus	16913	M. musculus	Psmb8	proteasome (prosome, macropain) subunit, beta type 8 (large multifunctional peptidase 7)	GO:0019882 antigen processing and presentation;GO:0045444 fat cell differentiation;GO:0043161 proteasome-mediated ubiquitin-dependent protein catabolic process		1.0	0.0	1.0	0.0	0.0	0.0	0.0	0.0	0.0	1.0	0.0	0.0	0.0	0.0	1.0	0.0	0.0	0.0	0.0	0.0
PSMC6	67089	symbol	M. musculus	67089	M. musculus	Psmc6	proteasome (prosome, macropain) 26S subunit, ATPase, 6	GO:0045899 positive regulation of RNA polymerase II transcription preinitiation complex assembly;GO:0045898 regulation of RNA polymerase II transcription preinitiation complex assembly;GO:0090261 positive regulation of inclusion body assembly		1.0	0.0	1.0	0.0	0.0	0.0	0.0	0.0	0.0	1.0	0.0	0.0	0.0	0.0	0.0	0.0	0.0	0.0	0.0	0.0
PSMG1	56088	symbol	M. musculus	56088	M. musculus	Psmg1	proteasome (prosome, macropain) assembly chaperone 1	GO:0080129 proteasome core complex assembly;GO:0021924 cell proliferation in external granule layer;GO:0021930 cerebellar granule cell precursor proliferation		0.0	0.0	0.0	0.0	0.0	0.0	0.0	0.0	0.0	0.0	0.0	0.0	0.0	0.0	0.0	0.0	0.0	0.0	0.0	0.0
PSTPIP2	19201	symbol	M. musculus	19201	M. musculus	Pstpip2	proline-serine-threonine phosphatase-interacting protein 2	GO:0030041 actin filament polymerization;GO:0008154 actin polymerization or depolymerization;GO:0051258 protein polymerization		0.0	0.0	0.0	0.0	0.0	0.0	0.0	0.0	0.0	0.0	0.0	0.0	0.0	0.0	0.0	0.0	0.0	0.0	0.0	0.0
PTGER2	19217	symbol	M. musculus	19217	M. musculus	Ptger2	prostaglandin E receptor 2 (subtype EP2)	GO:1904344 regulation of gastric mucosal blood circulation;GO:1904346 positive regulation of gastric mucosal blood circulation;GO:0072639 interleukin-33 production		0.0	0.0	0.0	0.0	1.0	1.0	0.0	0.0	0.0	0.0	0.0	0.0	0.0	0.0	0.0	0.0	0.0	0.0	0.0	0.0
PTGER4	19219	symbol	M. musculus	19219	M. musculus	Ptger4	prostaglandin E receptor 4 (subtype EP4)	GO:0042465 kinesis;GO:0042466 chemokinesis;GO:1904335 regulation of ductus arteriosus closure		0.0	0.0	0.0	0.0	1.0	1.0	0.0	1.0	1.0	0.0	1.0	0.0	0.0	0.0	0.0	1.0	1.0	1.0	0.0	0.0
PTK2B	19229	symbol	M. musculus	19229	M. musculus	Ptk2b	PTK2 protein tyrosine kinase 2 beta	GO:0043157 response to cation stress;GO:0007172 signal complex assembly;GO:2000537 regulation of B cell chemotaxis	yes	0.0	0.0	0.0	0.0	0.0	0.0	0.0	1.0	0.0	0.0	1.0	0.0	0.0	0.0	1.0	1.0	1.0	0.0	0.0	0.0
PTPN18	19253	symbol	M. musculus	19253	M. musculus	Ptpn18	protein tyrosine phosphatase, non-receptor type 18	GO:0001825 blastocyst formation;GO:0006470 protein dephosphorylation;GO:0001824 blastocyst development		0.0	0.0	0.0	0.0	0.0	0.0	0.0	0.0	0.0	0.0	0.0	0.0	0.0	0.0	0.0	0.0	0.0	0.0	0.0	0.0
PTRHD1	69709	symbol	M. musculus	69709	M. musculus	Ptrhd1	peptidyl-tRNA hydrolase domain containing 1	GO:0008150 biological_process		0.0	0.0	0.0	0.0	0.0	0.0	0.0	0.0	0.0	0.0	0.0	0.0	0.0	0.0	0.0	0.0	0.0	0.0	0.0	0.0
PUSL1	433813	symbol	M. musculus	433813	M. musculus	Pusl1	pseudouridylate synthase-like 1	GO:0031119 tRNA pseudouridine synthesis;GO:0001522 pseudouridine synthesis;GO:0006400 tRNA modification		0.0	0.0	0.0	0.0	0.0	0.0	0.0	0.0	0.0	0.0	0.0	0.0	0.0	0.0	0.0	0.0	0.0	0.0	0.0	0.0
PWWP2B	101631	symbol	M. musculus	101631	M. musculus	Pwwp2b	PWWP domain containing 2B	GO:0032968 positive regulation of transcription elongation by RNA polymerase II;GO:0032786 positive regulation of DNA-templated transcription, elongation;GO:0034243 regulation of transcription elongation by RNA polymerase II		0.0	0.0	0.0	0.0	0.0	0.0	0.0	0.0	0.0	0.0	0.0	0.0	0.0	0.0	0.0	0.0	0.0	0.0	0.0	0.0
PXDC1	66895	symbol	M. musculus	66895	M. musculus	Pxdc1	PX domain containing 1	GO:0008150 biological_process		0.0	0.0	0.0	0.0	0.0	0.0	0.0	0.0	0.0	0.0	0.0	0.0	0.0	0.0	0.0	0.0	0.0	0.0	0.0	0.0
PXYLP1	235534	symbol	M. musculus	235534	M. musculus	Pxylp1	2-phosphoxylose phosphatase 1	GO:0010909 positive regulation of heparan sulfate proteoglycan biosynthetic process;GO:0010908 regulation of heparan sulfate proteoglycan biosynthetic process;GO:1902730 positive regulation of proteoglycan biosynthetic process		0.0	0.0	0.0	0.0	0.0	0.0	0.0	0.0	0.0	0.0	0.0	0.0	0.0	0.0	0.0	0.0	0.0	0.0	0.0	0.0
PYGO2	68911	symbol	M. musculus	68911	M. musculus	Pygo2	pygopus 2	GO:0035563 positive regulation of chromatin binding;GO:0033599 regulation of mammary gland epithelial cell proliferation;GO:0035561 regulation of chromatin binding		0.0	0.0	0.0	0.0	0.0	0.0	0.0	0.0	0.0	0.0	0.0	0.0	0.0	0.0	0.0	0.0	0.0	0.0	0.0	0.0
RAB11FIP1	75767	symbol	M. musculus	75767	M. musculus	Rab11fip1	RAB11 family interacting protein 1 (class I)	GO:0070164 negative regulation of adiponectin secretion;GO:0070163 regulation of adiponectin secretion;GO:0050709 negative regulation of protein secretion		0.0	0.0	0.0	0.0	0.0	0.0	0.0	0.0	0.0	0.0	0.0	0.0	0.0	0.0	0.0	0.0	0.0	0.0	0.0	0.0
RAB11FIP4	268451	symbol	M. musculus	268451	M. musculus	Rab11fip4	RAB11 family interacting protein 4 (class II)	GO:0032456 endocytic recycling;GO:0032465 regulation of cytokinesis;GO:0098876 vesicle-mediated transport to the plasma membrane		0.0	0.0	0.0	0.0	0.0	0.0	0.0	0.0	0.0	0.0	0.0	0.0	0.0	0.0	0.0	0.0	0.0	0.0	0.0	0.0
RAB11FIP5	52055	symbol	M. musculus	52055	M. musculus	Rab11fip5	RAB11 family interacting protein 5 (class I)	GO:0070164 negative regulation of adiponectin secretion;GO:0070163 regulation of adiponectin secretion;GO:0071468 cellular response to acidic pH		0.0	0.0	0.0	0.0	0.0	0.0	1.0	0.0	0.0	0.0	1.0	0.0	0.0	0.0	0.0	0.0	0.0	0.0	0.0	0.0
RAB29	226422	symbol	M. musculus	226422	M. musculus	Rab29	RAB29, member RAS oncogene family	GO:1905279 regulation of retrograde transport, endosome to Golgi;GO:1903441 protein localization to ciliary membrane;GO:0001921 positive regulation of receptor recycling		0.0	0.0	0.0	0.0	0.0	0.0	0.0	0.0	0.0	0.0	1.0	0.0	0.0	0.0	0.0	1.0	0.0	1.0	0.0	0.0
RAB43	69834	symbol	M. musculus	69834	M. musculus	Rab43	RAB43, member RAS oncogene family	GO:0035526 retrograde transport, plasma membrane to Golgi;GO:0019068 virion assembly;GO:0090382 phagosome maturation		0.0	0.0	0.0	0.0	0.0	0.0	0.0	0.0	0.0	0.0	1.0	0.0	0.0	0.0	0.0	0.0	0.0	0.0	0.0	0.0
RAB7B	226421	symbol	M. musculus	226421	M. musculus	Rab7b	RAB7B, member RAS oncogene family	GO:0034164 negative regulation of toll-like receptor 9 signaling pathway;GO:0034499 late endosome to Golgi transport;GO:0034163 regulation of toll-like receptor 9 signaling pathway		0.0	0.0	0.0	0.0	0.0	0.0	1.0	0.0	1.0	0.0	1.0	0.0	0.0	0.0	0.0	0.0	0.0	0.0	0.0	0.0
RABAC1	14470	symbol	M. musculus	14470	M. musculus	Rabac1	Rab acceptor 1 (prenylated)			0.0	0.0	0.0	0.0	0.0	0.0	0.0	0.0	0.0	0.0	0.0	0.0	0.0	0.0	0.0	0.0	0.0	0.0	0.0	0.0
RABGEF1	56715	symbol	M. musculus	56715	M. musculus	Rabgef1	RAB guanine nucleotide exchange factor (GEF) 1	GO:1900234 regulation of Kit signaling pathway;GO:1900235 negative regulation of Kit signaling pathway;GO:0032764 negative regulation of mast cell cytokine production		0.0	0.0	0.0	1.0	0.0	1.0	1.0	1.0	1.0	0.0	0.0	0.0	0.0	0.0	0.0	1.0	1.0	1.0	0.0	0.0
RABGGTA	56187	symbol	M. musculus	56187	M. musculus	Rabggta	Rab geranylgeranyl transferase, a subunit	GO:0018344 protein geranylgeranylation;GO:0018342 protein prenylation;GO:0097354 prenylation		0.0	0.0	0.0	0.0	0.0	0.0	0.0	0.0	0.0	0.0	0.0	0.0	0.0	0.0	0.0	0.0	0.0	0.0	0.0	0.0
RACK1	14694	symbol	M. musculus	14694	M. musculus	Rack1	receptor for activated C kinase 1	GO:1903750 regulation of intrinsic apoptotic signaling pathway in response to hydrogen peroxide;GO:1903751 negative regulation of intrinsic apoptotic signaling pathway in response to hydrogen peroxide;GO:0042998 positive regulation of Golgi to plasma membrane protein transport		1.0	0.0	0.0	0.0	0.0	0.0	0.0	1.0	0.0	0.0	0.0	1.0	0.0	0.0	1.0	0.0	0.0	1.0	0.0	0.0
RAI14	75646	symbol	M. musculus	75646	M. musculus	Rai14	retinoic acid induced 14	GO:0007283 spermatogenesis;GO:0048232 male gamete generation;GO:0007276 gamete generation		0.0	0.0	0.0	0.0	0.0	0.0	0.0	0.0	0.0	0.0	0.0	0.0	0.0	0.0	0.0	0.0	0.0	0.0	0.0	0.0
RAP1GAP2	380711	symbol	M. musculus	380711	M. musculus	Rap1gap2	RAP1 GTPase activating protein 2	GO:0010977 negative regulation of neuron projection development;GO:0008361 regulation of cell size;GO:0031345 negative regulation of cell projection organization		0.0	0.0	0.0	0.0	0.0	0.0	0.0	0.0	0.0	0.0	0.0	0.0	0.0	0.0	0.0	0.0	0.0	1.0	0.0	0.0
RAPH1	77300	symbol	M. musculus	77300	M. musculus	Raph1	Ras association (RalGDS/AF-6) and pleckstrin homology domains 1	GO:0048675 axon extension;GO:1990138 neuron projection extension;GO:0048588 developmental cell growth		0.0	0.0	0.0	0.0	0.0	0.0	0.0	0.0	0.0	0.0	0.0	0.0	0.0	0.0	0.0	0.0	0.0	0.0	0.0	0.0
RAPSN	19400	symbol	M. musculus	19400	M. musculus	Rapsn	receptor-associated protein of the synapse	GO:1900073 regulation of neuromuscular synaptic transmission;GO:1900075 positive regulation of neuromuscular synaptic transmission;GO:2000673 positive regulation of motor neuron apoptotic process		0.0	0.0	0.0	0.0	0.0	0.0	0.0	0.0	0.0	0.0	0.0	1.0	0.0	0.0	0.0	0.0	0.0	0.0	0.0	0.0
RARG	19411	symbol	M. musculus	19411	M. musculus	Rarg	retinoic acid receptor, gamma	GO:0003430 growth plate cartilage chondrocyte growth;GO:0070384 Harderian gland development;GO:0003415 chondrocyte hypertrophy		0.0	0.0	0.0	0.0	0.0	0.0	0.0	0.0	0.0	0.0	1.0	1.0	0.0	0.0	0.0	0.0	0.0	0.0	0.0	0.0
RASA2	114713	symbol	M. musculus	114713	M. musculus	Rasa2	RAS p21 protein activator 2	GO:0046580 negative regulation of Ras protein signal transduction;GO:0046578 regulation of Ras protein signal transduction;GO:0051058 negative regulation of small GTPase mediated signal transduction		0.0	0.0	0.0	0.0	0.0	0.0	0.0	0.0	0.0	0.0	0.0	0.0	0.0	0.0	0.0	0.0	0.0	0.0	0.0	0.0
RASGEF1B	320292	symbol	M. musculus	320292	M. musculus	Rasgef1b	RasGEF domain family, member 1B	GO:0007265 Ras protein signal transduction;GO:0007264 small GTPase-mediated signal transduction;GO:0141124 intracellular signaling cassette		0.0	0.0	0.0	0.0	0.0	0.0	0.0	0.0	0.0	0.0	0.0	0.0	0.0	0.0	0.0	0.0	1.0	0.0	0.0	0.0
RASGRP1	19419	symbol	M. musculus	19419	M. musculus	Rasgrp1	RAS guanyl releasing protein 1	GO:0032762 mast cell cytokine production;GO:0032825 positive regulation of natural killer cell differentiation;GO:0033089 positive regulation of T cell differentiation in thymus		0.0	0.0	0.0	0.0	1.0	1.0	0.0	0.0	1.0	0.0	1.0	0.0	0.0	0.0	0.0	1.0	1.0	0.0	0.0	0.0
RASSF1	56289	symbol	M. musculus	56289	M. musculus	Rassf1	Ras association (RalGDS/AF-6) domain family member 1	GO:0007265 Ras protein signal transduction;GO:0031398 positive regulation of protein ubiquitination;GO:1903322 positive regulation of protein modification by small protein conjugation or removal		0.0	0.0	0.0	0.0	0.0	0.0	0.0	0.0	0.0	0.0	0.0	0.0	0.0	0.0	0.0	0.0	1.0	0.0	0.0	0.0
RASSF3	192678	symbol	M. musculus	192678	M. musculus	Rassf3	Ras association (RalGDS/AF-6) domain family member 3	GO:0007165 signal transduction;GO:0023052 signaling;GO:0007154 cell communication		0.0	0.0	0.0	0.0	0.0	0.0	0.0	0.0	0.0	0.0	0.0	0.0	0.0	0.0	0.0	0.0	0.0	0.0	0.0	0.0
RASSF4	213391	symbol	M. musculus	213391	M. musculus	Rassf4	Ras association (RalGDS/AF-6) domain family member 4	GO:0007049 cell cycle;GO:0007165 signal transduction;GO:0023052 signaling		0.0	0.0	0.0	0.0	0.0	0.0	0.0	0.0	0.0	0.0	0.0	0.0	0.0	0.0	0.0	0.0	0.0	0.0	0.0	0.0
RASSF7	66985	symbol	M. musculus	66985	M. musculus	Rassf7	Ras association (RalGDS/AF-6) domain family (N-terminal) member 7	GO:0006915 apoptotic process;GO:0012501 programmed cell death;GO:0008219 cell death		0.0	0.0	0.0	0.0	0.0	0.0	0.0	0.0	0.0	0.0	0.0	0.0	0.0	0.0	0.0	0.0	0.0	0.0	0.0	0.0
RBAK	57782	symbol	M. musculus	57782	M. musculus	Rbak	RB-associated KRAB zinc finger	GO:0006357 regulation of transcription by RNA polymerase II;GO:0006355 regulation of DNA-templated transcription;GO:2001141 regulation of RNA biosynthetic process		0.0	0.0	0.0	0.0	0.0	0.0	0.0	0.0	0.0	0.0	0.0	0.0	0.0	0.0	0.0	0.0	0.0	0.0	0.0	0.0
RBM14	56275	symbol	M. musculus	56275	M. musculus	Rbm14	RNA binding motif protein 14	GO:1902145 regulation of response to cell cycle checkpoint signaling;GO:1902151 regulation of response to DNA integrity checkpoint signaling;GO:0098534 centriole assembly		0.0	0.0	0.0	0.0	0.0	0.0	0.0	0.0	0.0	0.0	1.0	0.0	0.0	0.0	0.0	0.0	0.0	0.0	0.0	0.0
RBM8A	60365	symbol	M. musculus	60365	M. musculus	Rbm8a	RNA binding motif protein 8a	GO:2000622 regulation of nuclear-transcribed mRNA catabolic process, nonsense-mediated decay;GO:0000184 nuclear-transcribed mRNA catabolic process, nonsense-mediated decay;GO:0000381 regulation of alternative mRNA splicing, via spliceosome		1.0	0.0	0.0	0.0	0.0	0.0	0.0	0.0	0.0	0.0	0.0	0.0	0.0	0.0	0.0	0.0	0.0	0.0	0.0	0.0
RBMS1	56878	symbol	M. musculus	56878	M. musculus	Rbms1	RNA binding motif, single stranded interacting protein 1	GO:0006260 DNA replication;GO:0006259 DNA metabolic process;GO:0090304 nucleic acid metabolic process		0.0	0.0	0.0	0.0	0.0	0.0	0.0	0.0	0.0	0.0	0.0	0.0	0.0	0.0	0.0	0.0	0.0	0.0	0.0	0.0
RBPJ	19664	symbol	M. musculus	19664	M. musculus	Rbpj	recombination signal binding protein for immunoglobulin kappa J region	GO:0060844 arterial endothelial cell fate commitment;GO:0072554 blood vessel lumenization;GO:1901189 positive regulation of ephrin receptor signaling pathway		0.0	0.0	0.0	0.0	1.0	1.0	0.0	0.0	0.0	0.0	0.0	0.0	0.0	0.0	0.0	1.0	0.0	0.0	0.0	0.0
REPS2	194590	symbol	M. musculus	194590	M. musculus	Reps2	RALBP1 associated Eps domain containing protein 2	GO:0016197 endosomal transport;GO:0006897 endocytosis;GO:0098657 import into cell		0.0	0.0	0.0	0.0	0.0	0.0	1.0	0.0	0.0	0.0	0.0	0.0	0.0	0.0	0.0	0.0	0.0	0.0	0.0	0.0
REV1	56210	symbol	M. musculus	56210	M. musculus	Rev1	REV1, DNA directed polymerase	GO:0070987 error-free translesion synthesis;GO:0042276 error-prone translesion synthesis;GO:0019985 translesion synthesis		0.0	0.0	0.0	0.0	0.0	0.0	0.0	0.0	0.0	0.0	0.0	0.0	0.0	0.0	0.0	0.0	0.0	0.0	0.0	0.0
RFTN1	76438	symbol	M. musculus	76438	M. musculus	Rftn1	raftlin lipid raft linker 1	GO:0033227 dsRNA transport;GO:0040010 positive regulation of growth rate;GO:0002457 T cell antigen processing and presentation		0.0	0.0	0.0	0.0	0.0	0.0	0.0	0.0	1.0	0.0	1.0	0.0	0.0	0.0	0.0	1.0	0.0	0.0	0.0	0.0
RFXAP	170767	symbol	M. musculus	170767	M. musculus	Rfxap	regulatory factor X-associated protein	GO:0045944 positive regulation of transcription by RNA polymerase II;GO:0045893 positive regulation of DNA-templated transcription;GO:1902680 positive regulation of RNA biosynthetic process		0.0	0.0	0.0	0.0	0.0	0.0	0.0	0.0	1.0	0.0	0.0	0.0	0.0	0.0	0.0	0.0	0.0	0.0	0.0	0.0
RGS1	50778	symbol	M. musculus	50778	M. musculus	Rgs1	regulator of G-protein signaling 1	GO:0061737 leukotriene signaling pathway;GO:0043547 positive regulation of GTPase activity;GO:0043087 regulation of GTPase activity		0.0	0.0	0.0	0.0	0.0	0.0	0.0	0.0	0.0	0.0	0.0	0.0	0.0	0.0	0.0	0.0	0.0	0.0	0.0	0.0
RGS11	50782	symbol	M. musculus	50782	M. musculus	Rgs11	regulator of G-protein signaling 11	GO:0008277 regulation of G protein-coupled receptor signaling pathway;GO:0043547 positive regulation of GTPase activity;GO:0043087 regulation of GTPase activity		0.0	0.0	0.0	0.0	0.0	0.0	0.0	0.0	0.0	0.0	0.0	0.0	0.0	0.0	0.0	0.0	0.0	0.0	0.0	0.0
RGS18	64214	symbol	M. musculus	64214	M. musculus	Rgs18	regulator of G-protein signaling 18	GO:0008277 regulation of G protein-coupled receptor signaling pathway;GO:0009968 negative regulation of signal transduction;GO:0023057 negative regulation of signaling		0.0	0.0	0.0	0.0	0.0	0.0	0.0	0.0	0.0	0.0	0.0	0.0	0.0	0.0	0.0	0.0	0.0	0.0	0.0	0.0
RHBDF1	13650	symbol	M. musculus	13650	M. musculus	Rhbdf1	rhomboid 5 homolog 1	GO:0042058 regulation of epidermal growth factor receptor signaling pathway;GO:1901184 regulation of ERBB signaling pathway;GO:0050709 negative regulation of protein secretion		0.0	0.0	0.0	0.0	0.0	0.0	0.0	0.0	0.0	0.0	0.0	0.0	0.0	0.0	1.0	0.0	0.0	0.0	0.0	0.0
RHBDF2	217344	symbol	M. musculus	217344	M. musculus	Rhbdf2	rhomboid 5 homolog 2	GO:1904683 regulation of metalloendopeptidase activity;GO:1905048 regulation of metallopeptidase activity;GO:0042058 regulation of epidermal growth factor receptor signaling pathway		0.0	0.0	0.0	0.0	0.0	0.0	0.0	0.0	0.0	0.0	0.0	0.0	0.0	0.0	1.0	0.0	0.0	0.0	0.0	0.0
RHOG	56212	symbol	M. musculus	56212	M. musculus	Rhog	ras homolog family member G	GO:0016601 Rac protein signal transduction;GO:1900027 regulation of ruffle assembly;GO:0030865 cortical cytoskeleton organization		0.0	1.0	0.0	1.0	0.0	0.0	0.0	0.0	0.0	0.0	0.0	0.0	0.0	0.0	0.0	0.0	1.0	0.0	0.0	0.0
RIPOR2	193385	symbol	M. musculus	193385	M. musculus	Ripor2	RHO family interacting cell polarization regulator 2	GO:1903904 negative regulation of establishment of T cell polarity;GO:1905872 negative regulation of protein localization to cell leading edge;GO:2001107 negative regulation of Rho guanyl-nucleotide exchange factor activity		0.0	0.0	0.0	1.0	0.0	0.0	0.0	1.0	0.0	0.0	1.0	0.0	0.0	0.0	0.0	0.0	0.0	0.0	0.0	0.0
RNASEL	24014	symbol	M. musculus	24014	M. musculus	Rnasel	ribonuclease L (2', 5'-oligoisoadenylate synthetase-dependent)	GO:0046326 positive regulation of glucose import;GO:0045071 negative regulation of viral genome replication;GO:0010828 positive regulation of glucose transmembrane transport	yes	1.0	0.0	0.0	0.0	0.0	0.0	0.0	0.0	0.0	0.0	0.0	0.0	0.0	0.0	0.0	0.0	0.0	0.0	0.0	0.0
RNF122	68867	symbol	M. musculus	68867	M. musculus	Rnf122	ring finger protein 122	GO:0010917 negative regulation of mitochondrial membrane potential;GO:0045837 negative regulation of membrane potential;GO:0051865 protein autoubiquitination		0.0	0.0	0.0	0.0	0.0	0.0	0.0	0.0	0.0	0.0	0.0	1.0	0.0	0.0	0.0	0.0	0.0	0.0	0.0	0.0
RNF150	330812	symbol	M. musculus	330812	M. musculus	Rnf150	ring finger protein 150	GO:0006511 ubiquitin-dependent protein catabolic process;GO:0019941 modification-dependent protein catabolic process;GO:0043632 modification-dependent macromolecule catabolic process		0.0	0.0	0.0	0.0	0.0	0.0	0.0	0.0	0.0	0.0	0.0	0.0	0.0	0.0	0.0	0.0	0.0	0.0	0.0	0.0
RNF4	19822	symbol	M. musculus	19822	M. musculus	Rnf4	ring finger protein 4	GO:0090234 regulation of kinetochore assembly;GO:0090230 regulation of centromere complex assembly;GO:0120186 negative regulation of protein localization to chromatin		0.0	0.0	0.0	0.0	0.0	0.0	0.0	0.0	0.0	0.0	0.0	0.0	0.0	0.0	0.0	0.0	0.0	0.0	0.0	0.0
RNH1	107702	symbol	M. musculus	107702	M. musculus	Rnh1	ribonuclease/angiogenin inhibitor 1	GO:0034315 regulation of Arp2/3 complex-mediated actin nucleation;GO:0051125 regulation of actin nucleation;GO:0110053 regulation of actin filament organization		0.0	0.0	0.0	0.0	0.0	0.0	0.0	0.0	0.0	0.0	0.0	0.0	0.0	0.0	0.0	0.0	0.0	0.0	0.0	0.0
ROGDI	66049	symbol	M. musculus	66049	M. musculus	Rogdi	rogdi homolog	GO:0045851 pH reduction;GO:0070166 enamel mineralization;GO:0045475 locomotor rhythm		0.0	0.0	0.0	1.0	0.0	0.0	0.0	0.0	0.0	0.0	0.0	0.0	0.0	0.0	0.0	0.0	0.0	0.0	0.0	0.0
RPL10A	19896	symbol	M. musculus	19896	M. musculus	Rpl10a	ribosomal protein L10A	GO:0140236 translation at presynapse;GO:0140241 translation at synapse;GO:0140242 translation at postsynapse		1.0	0.0	0.0	0.0	0.0	0.0	0.0	0.0	0.0	0.0	0.0	0.0	0.0	0.0	0.0	0.0	0.0	0.0	0.0	0.0
RPL13A	22121	symbol	M. musculus	22121	M. musculus	Rpl13a	ribosomal protein L13A	GO:1901193 regulation of formation of translation preinitiation complex;GO:1901194 negative regulation of formation of translation preinitiation complex;GO:1904689 negative regulation of cytoplasmic translational initiation		1.0	0.0	0.0	1.0	0.0	0.0	0.0	0.0	0.0	0.0	1.0	0.0	0.0	0.0	0.0	0.0	0.0	1.0	0.0	0.0
RPL14	67115	symbol	M. musculus	67115	M. musculus	Rpl14	ribosomal protein L14	GO:0140236 translation at presynapse;GO:0140241 translation at synapse;GO:0140242 translation at postsynapse		1.0	0.0	0.0	0.0	0.0	0.0	0.0	0.0	0.0	0.0	0.0	0.0	0.0	0.0	0.0	0.0	0.0	0.0	0.0	0.0
RPL18	19899	symbol	M. musculus	19899	M. musculus	Rpl18	ribosomal protein L18	GO:0002181 cytoplasmic translation;GO:0006412 translation;GO:1901566 organonitrogen compound biosynthetic process		1.0	0.0	0.0	0.0	0.0	0.0	0.0	0.0	0.0	0.0	0.0	0.0	0.0	0.0	0.0	0.0	0.0	0.0	0.0	0.0
RPL23	65019	symbol	M. musculus	65019	M. musculus	Rpl23	ribosomal protein L23	GO:0072717 cellular response to actinomycin D;GO:0072716 response to actinomycin D;GO:1903450 regulation of G1 to G0 transition		1.0	0.0	0.0	0.0	0.0	0.0	0.0	0.0	0.0	0.0	0.0	0.0	0.0	0.0	1.0	0.0	0.0	0.0	0.0	0.0
RPL32	19951	symbol	M. musculus	19951	M. musculus	Rpl32	ribosomal protein L32	GO:0140236 translation at presynapse;GO:0140241 translation at synapse;GO:0140242 translation at postsynapse		1.0	0.0	0.0	0.0	0.0	0.0	0.0	0.0	0.0	0.0	0.0	0.0	0.0	0.0	0.0	0.0	0.0	0.0	0.0	0.0
RPL36A	19982	symbol	M. musculus	19982	M. musculus	Rpl36a	ribosomal protein L36A	GO:0140236 translation at presynapse;GO:0140241 translation at synapse;GO:0140242 translation at postsynapse		1.0	0.0	0.0	0.0	0.0	0.0	0.0	0.0	0.0	0.0	0.0	0.0	0.0	0.0	0.0	0.0	0.0	0.0	0.0	0.0
RPL4	67891	symbol	M. musculus	67891	M. musculus	Rpl4	ribosomal protein L4	GO:0140236 translation at presynapse;GO:0140241 translation at synapse;GO:0140242 translation at postsynapse		1.0	0.0	0.0	0.0	0.0	0.0	0.0	0.0	0.0	0.0	0.0	0.0	0.0	0.0	0.0	0.0	0.0	0.0	0.0	0.0
RPL8	26961	symbol	M. musculus	26961	M. musculus	Rpl8	ribosomal protein L8	GO:0140236 translation at presynapse;GO:0140241 translation at synapse;GO:0140242 translation at postsynapse		1.0	0.0	0.0	0.0	0.0	0.0	0.0	0.0	0.0	0.0	0.0	0.0	0.0	0.0	0.0	0.0	0.0	0.0	0.0	0.0
RPLP1	56040	symbol	M. musculus	56040	M. musculus	Rplp1	ribosomal protein lateral stalk subunit P1	GO:0006414 translational elongation;GO:0002181 cytoplasmic translation;GO:0006417 regulation of translation		1.0	0.0	0.0	0.0	0.0	0.0	0.0	0.0	0.0	0.0	0.0	0.0	0.0	0.0	0.0	0.0	0.0	0.0	0.0	0.0
RPLP2	67186	symbol	M. musculus	67186	M. musculus	Rplp2	ribosomal protein lateral stalk subunit P2	GO:0002182 cytoplasmic translational elongation;GO:0140236 translation at presynapse;GO:0140241 translation at synapse		1.0	0.0	0.0	0.0	0.0	0.0	0.0	0.0	0.0	0.0	0.0	0.0	0.0	0.0	0.0	0.0	0.0	0.0	0.0	0.0
RPP25L	69961	symbol	M. musculus	69961	M. musculus	Rpp25l	ribonuclease P/MRP 25 subunit-like	GO:0001682 tRNA 5'-leader removal;GO:0099116 tRNA 5'-end processing;GO:0000966 RNA 5'-end processing		0.0	0.0	0.0	0.0	0.0	0.0	0.0	0.0	0.0	0.0	0.0	0.0	0.0	0.0	0.0	0.0	0.0	0.0	0.0	0.0
RPS10	67097	symbol	M. musculus	67097	M. musculus	Rps10	ribosomal protein S10	GO:0140236 translation at presynapse;GO:0140241 translation at synapse;GO:0140242 translation at postsynapse		1.0	0.0	0.0	0.0	0.0	0.0	0.0	0.0	0.0	0.0	0.0	0.0	0.0	0.0	0.0	0.0	0.0	0.0	0.0	0.0
RPS11	27207	symbol	M. musculus	27207	M. musculus	Rps11	ribosomal protein S11	GO:0140236 translation at presynapse;GO:0140241 translation at synapse;GO:0140242 translation at postsynapse		1.0	0.0	0.0	0.0	0.0	0.0	0.0	0.0	0.0	0.0	0.0	0.0	0.0	0.0	0.0	0.0	0.0	0.0	0.0	0.0
RPS14	20044	symbol	M. musculus	20044	M. musculus	Rps14	ribosomal protein S14	GO:0000028 ribosomal small subunit assembly;GO:0140236 translation at presynapse;GO:0140241 translation at synapse		1.0	0.0	0.0	0.0	0.0	0.0	0.0	0.0	0.0	0.0	0.0	0.0	0.0	0.0	0.0	0.0	0.0	0.0	0.0	0.0
RPS15	20054	symbol	M. musculus	20054	M. musculus	Rps15	ribosomal protein S15	GO:0000056 ribosomal small subunit export from nucleus;GO:0000054 ribosomal subunit export from nucleus;GO:0033750 ribosome localization		1.0	0.0	0.0	0.0	0.0	0.0	0.0	0.0	0.0	0.0	0.0	0.0	0.0	0.0	0.0	0.0	0.0	0.0	0.0	0.0
RPS17	20068	symbol	M. musculus	20068	M. musculus	Rps17	ribosomal protein S17	GO:0042274 ribosomal small subunit biogenesis;GO:0002181 cytoplasmic translation;GO:0034101 erythrocyte homeostasis		1.0	0.0	0.0	0.0	0.0	0.0	0.0	0.0	0.0	0.0	0.0	0.0	0.0	0.0	0.0	0.0	0.0	0.0	0.0	0.0
RPS19	20085	symbol	M. musculus	20085	M. musculus	Rps19	ribosomal protein S19	GO:0060265 positive regulation of respiratory burst involved in inflammatory response;GO:0060266 negative regulation of respiratory burst involved in inflammatory response;GO:0060267 positive regulation of respiratory burst		1.0	0.0	0.0	1.0	0.0	0.0	0.0	0.0	0.0	0.0	1.0	0.0	0.0	0.0	0.0	0.0	0.0	0.0	0.0	0.0
RPS20	67427	symbol	M. musculus	67427	M. musculus	Rps20	ribosomal protein S20	GO:1901798 positive regulation of signal transduction by p53 class mediator;GO:1901796 regulation of signal transduction by p53 class mediator;GO:0002181 cytoplasmic translation		1.0	0.0	0.0	0.0	0.0	0.0	0.0	0.0	0.0	0.0	0.0	0.0	0.0	0.0	0.0	0.0	0.0	0.0	0.0	0.0
RPS21	66481	symbol	M. musculus	66481	M. musculus	Rps21	ribosomal protein S21	GO:0000461 endonucleolytic cleavage to generate mature 3'-end of SSU-rRNA from (SSU-rRNA, 5.8S rRNA, LSU-rRNA);GO:0000447 endonucleolytic cleavage in ITS1 to separate SSU-rRNA from 5.8S rRNA and LSU-rRNA from tricistronic rRNA transcript (SSU-rRNA, 5.8S rRNA, LSU-rRNA);GO:0031125 rRNA 3'-end processing		1.0	0.0	0.0	0.0	0.0	0.0	0.0	0.0	0.0	0.0	0.0	0.0	0.0	0.0	0.0	0.0	0.0	0.0	0.0	0.0
RPS26	27370	symbol	M. musculus	27370	M. musculus	Rps26	ribosomal protein S26	GO:0033119 negative regulation of RNA splicing;GO:0140236 translation at presynapse;GO:0140241 translation at synapse		1.0	0.0	0.0	0.0	0.0	0.0	0.0	0.0	0.0	0.0	0.0	0.0	0.0	0.0	0.0	0.0	0.0	0.0	0.0	0.0
RPS3A	20091	gene_synonym	M. musculus	20091	M. musculus	Rps3a1	ribosomal protein S3A1	GO:0042274 ribosomal small subunit biogenesis;GO:0002181 cytoplasmic translation;GO:0042254 ribosome biogenesis		1.0	0.0	0.0	0.0	0.0	0.0	0.0	0.0	0.0	0.0	0.0	0.0	0.0	0.0	0.0	0.0	0.0	0.0	0.0	0.0
RPS4X	20102	symbol	M. musculus	20102	M. musculus	Rps4x	ribosomal protein S4, X-linked	GO:0002181 cytoplasmic translation;GO:0006412 translation;GO:1901566 organonitrogen compound biosynthetic process		1.0	0.0	0.0	0.0	0.0	0.0	0.0	0.0	0.0	0.0	0.0	0.0	0.0	0.0	0.0	0.0	0.0	0.0	0.0	0.0
RPS5	20103	symbol	M. musculus	20103	M. musculus	Rps5	ribosomal protein S5	GO:0006450 regulation of translational fidelity;GO:0000028 ribosomal small subunit assembly;GO:0140236 translation at presynapse		1.0	0.0	0.0	0.0	0.0	0.0	0.0	0.0	0.0	0.0	0.0	0.0	0.0	0.0	0.0	0.0	0.0	0.0	0.0	0.0
RPS9	76846	symbol	M. musculus	76846	M. musculus	Rps9	ribosomal protein S9	GO:0042274 ribosomal small subunit biogenesis;GO:0002181 cytoplasmic translation;GO:0042254 ribosome biogenesis		1.0	0.0	0.0	0.0	0.0	0.0	0.0	0.0	0.0	0.0	0.0	0.0	0.0	0.0	0.0	0.0	0.0	0.0	0.0	0.0
RRAGA	68441	symbol	M. musculus	68441	M. musculus	Rraga	Ras-related GTP binding A	GO:0042268 regulation of cytolysis;GO:0061462 protein localization to lysosome;GO:0033209 tumor necrosis factor-mediated signaling pathway		0.0	0.0	0.0	0.0	0.0	0.0	0.0	0.0	0.0	1.0	0.0	0.0	0.0	0.0	0.0	0.0	0.0	0.0	0.0	0.0
RRAGC	54170	symbol	M. musculus	54170	M. musculus	Rragc	Ras-related GTP binding C	GO:0061462 protein localization to lysosome;GO:0034198 cellular response to amino acid starvation;GO:1904263 positive regulation of TORC1 signaling		0.0	0.0	0.0	0.0	0.0	0.0	0.0	0.0	0.0	1.0	0.0	0.0	0.0	0.0	0.0	0.0	0.0	0.0	0.0	0.0
RSC1A1	69994	symbol	M. musculus	69994	M. musculus	Rsc1a1	regulatory solute carrier protein, family 1, member 1	GO:0032243 negative regulation of nucleoside transport;GO:0032242 regulation of nucleoside transport;GO:0032240 negative regulation of nucleobase-containing compound transport		0.0	0.0	0.0	0.0	0.0	0.0	0.0	0.0	0.0	0.0	0.0	0.0	0.0	0.0	0.0	0.0	0.0	0.0	0.0	0.0
RTCB	28088	symbol	M. musculus	28088	M. musculus	Rtcb	RNA 2',3'-cyclic phosphate and 5'-OH ligase	GO:0006388 tRNA splicing, via endonucleolytic cleavage and ligation;GO:0000394 RNA splicing, via endonucleolytic cleavage and ligation;GO:0008033 tRNA processing		0.0	0.0	0.0	0.0	0.0	0.0	0.0	0.0	0.0	0.0	0.0	0.0	0.0	0.0	0.0	0.0	0.0	0.0	0.0	0.0
RUNX2	12393	symbol	M. musculus	12393	M. musculus	Runx2	runt related transcription factor 2	GO:0036076 ligamentous ossification;GO:0002051 osteoblast fate commitment;GO:1904383 response to sodium phosphate		0.0	0.0	0.0	0.0	0.0	0.0	0.0	0.0	0.0	0.0	0.0	0.0	0.0	0.0	0.0	1.0	1.0	0.0	0.0	0.0
RUSC1	72296	symbol	M. musculus	72296	M. musculus	Rusc1	RUN and SH3 domain containing 1	GO:0000209 protein polyubiquitination;GO:0016567 protein ubiquitination;GO:0032446 protein modification by small protein conjugation		0.0	0.0	0.0	0.0	0.0	0.0	0.0	0.0	0.0	0.0	0.0	0.0	0.0	0.0	0.0	0.0	0.0	0.0	0.0	0.0
S100A1	20193	symbol	M. musculus	20193	M. musculus	S100a1	S100 calcium binding protein A1	GO:0051000 positive regulation of nitric-oxide synthase activity;GO:0050999 regulation of nitric-oxide synthase activity;GO:0032770 positive regulation of monooxygenase activity		0.0	0.0	0.0	0.0	0.0	0.0	0.0	0.0	0.0	0.0	0.0	0.0	0.0	0.0	0.0	0.0	0.0	0.0	0.0	0.0
S100A11	20195	symbol	M. musculus	20195	M. musculus	S100a11	S100 calcium binding protein A11	GO:0014911 positive regulation of smooth muscle cell migration;GO:0014910 regulation of smooth muscle cell migration;GO:0030335 positive regulation of cell migration		0.0	1.0	0.0	0.0	0.0	0.0	0.0	1.0	0.0	0.0	0.0	0.0	0.0	0.0	0.0	0.0	0.0	0.0	0.0	0.0
S100A9	20202	symbol	M. musculus	20202	M. musculus	S100a9	S100 calcium binding protein A9 (calgranulin B)	GO:0035606 peptidyl-cysteine S-trans-nitrosylation;GO:0070488 neutrophil aggregation;GO:0018119 peptidyl-cysteine S-nitrosylation		0.0	1.0	0.0	1.0	1.0	0.0	0.0	0.0	0.0	0.0	1.0	1.0	0.0	0.0	1.0	0.0	0.0	0.0	0.0	0.0
SAP30	60406	symbol	M. musculus	60406	M. musculus	Sap30	sin3 associated polypeptide	GO:0052472 modulation by host of symbiont transcription;GO:1902455 negative regulation of stem cell population maintenance;GO:1902459 positive regulation of stem cell population maintenance		0.0	0.0	0.0	0.0	0.0	0.0	0.0	0.0	0.0	0.0	0.0	0.0	0.0	0.0	0.0	0.0	0.0	0.0	0.0	0.0
SARS2	71984	symbol	M. musculus	71984	M. musculus	Sars2	seryl-aminoacyl-tRNA synthetase 2	GO:0070158 mitochondrial seryl-tRNA aminoacylation;GO:0006434 seryl-tRNA aminoacylation;GO:0070127 tRNA aminoacylation for mitochondrial protein translation		1.0	0.0	0.0	0.0	0.0	0.0	0.0	0.0	0.0	0.0	0.0	0.0	0.0	0.0	0.0	0.0	0.0	0.0	0.0	0.0
SCN2B	72821	symbol	M. musculus	72821	M. musculus	Scn2b	sodium channel, voltage-gated, type II, beta	GO:0046684 response to pyrethroid;GO:0017085 response to insecticide;GO:0060371 regulation of atrial cardiac muscle cell membrane depolarization		0.0	0.0	0.0	0.0	0.0	0.0	0.0	0.0	0.0	0.0	0.0	0.0	0.0	0.0	0.0	0.0	0.0	0.0	0.0	0.0
SCPEP1	74617	symbol	M. musculus	74617	M. musculus	Scpep1	serine carboxypeptidase 1	GO:0045776 negative regulation of blood pressure;GO:0035296 regulation of tube diameter;GO:0097746 blood vessel diameter maintenance		0.0	0.0	0.0	0.0	0.0	0.0	0.0	0.0	0.0	0.0	0.0	0.0	0.0	0.0	0.0	0.0	0.0	0.0	0.0	0.0
SDC3	20970	symbol	M. musculus	20970	M. musculus	Sdc3	syndecan 3	GO:0007155 cell adhesion;GO:0016477 cell migration;GO:0030334 regulation of cell migration		0.0	0.0	0.0	0.0	0.0	0.0	0.0	0.0	0.0	0.0	0.0	0.0	0.0	0.0	0.0	0.0	0.0	0.0	0.0	0.0
SEC14L1	74136	symbol	M. musculus	74136	M. musculus	Sec14l1	SEC14-like lipid binding 1	GO:0039536 negative regulation of RIG-I signaling pathway;GO:0015871 choline transport;GO:0039535 regulation of RIG-I signaling pathway		0.0	0.0	0.0	0.0	0.0	0.0	0.0	0.0	0.0	0.0	1.0	0.0	0.0	0.0	0.0	0.0	0.0	0.0	0.0	0.0
SELENOH	72657	symbol	M. musculus	72657	M. musculus	Selenoh	selenoprotein H			0.0	0.0	0.0	0.0	0.0	0.0	0.0	0.0	0.0	0.0	0.0	0.0	0.0	0.0	0.0	0.0	0.0	0.0	0.0	0.0
SELENON	74777	symbol	M. musculus	74777	M. musculus	Selenon	selenoprotein N	GO:0022614 membrane to membrane docking;GO:0015882 L-ascorbic acid transmembrane transport;GO:0014834 skeletal muscle satellite cell maintenance involved in skeletal muscle regeneration		0.0	0.0	0.0	0.0	0.0	0.0	0.0	0.0	0.0	0.0	0.0	0.0	0.0	0.0	0.0	0.0	0.0	0.0	1.0	0.0
SELENOW	20364	symbol	M. musculus	20364	M. musculus	Selenow	selenoprotein W	GO:0010269 response to selenium ion;GO:0032496 response to lipopolysaccharide;GO:0002237 response to molecule of bacterial origin		0.0	0.0	0.0	0.0	0.0	0.0	0.0	0.0	0.0	0.0	0.0	0.0	0.0	0.0	0.0	0.0	0.0	0.0	0.0	0.0
SEMA6B	20359	symbol	M. musculus	20359	M. musculus	Sema6b	sema domain, transmembrane domain (TM), and cytoplasmic domain, (semaphorin) 6B	GO:0050919 negative chemotaxis;GO:0071526 semaphorin-plexin signaling pathway;GO:0001755 neural crest cell migration		0.0	0.0	0.0	1.0	0.0	0.0	0.0	1.0	0.0	0.0	0.0	0.0	0.0	0.0	0.0	0.0	0.0	0.0	0.0	0.0
SERP1	28146	symbol	M. musculus	28146	M. musculus	Serp1	stress-associated endoplasmic reticulum protein 1	GO:0060124 positive regulation of growth hormone secretion;GO:0060123 regulation of growth hormone secretion;GO:0030968 endoplasmic reticulum unfolded protein response		0.0	0.0	0.0	0.0	0.0	0.0	0.0	0.0	0.0	0.0	0.0	0.0	0.0	0.0	0.0	0.0	0.0	0.0	1.0	0.0
SERPINB8	20725	symbol	M. musculus	20725	M. musculus	Serpinb8	serine (or cysteine) peptidase inhibitor, clade B, member 8	GO:0090136 epithelial cell-cell adhesion;GO:0010951 negative regulation of endopeptidase activity;GO:0010466 negative regulation of peptidase activity		0.0	0.0	0.0	0.0	0.0	0.0	0.0	0.0	0.0	0.0	0.0	0.0	0.0	0.0	1.0	0.0	0.0	0.0	0.0	0.0
SERPINF1	20317	symbol	M. musculus	20317	M. musculus	Serpinf1	serine (or cysteine) peptidase inhibitor, clade F, member 1	GO:0060770 negative regulation of epithelial cell proliferation involved in prostate gland development;GO:0060767 epithelial cell proliferation involved in prostate gland development;GO:0060768 regulation of epithelial cell proliferation involved in prostate gland development		0.0	0.0	0.0	0.0	0.0	0.0	0.0	0.0	0.0	0.0	0.0	0.0	0.0	0.0	1.0	0.0	0.0	0.0	0.0	0.0
SETD3	52690	symbol	M. musculus	52690	M. musculus	Setd3	SET domain containing 3	GO:0018021 peptidyl-histidine methylation;GO:0030047 actin modification;GO:0018023 peptidyl-lysine trimethylation		0.0	0.0	0.0	0.0	0.0	0.0	0.0	0.0	0.0	0.0	0.0	0.0	0.0	0.0	0.0	0.0	0.0	0.0	0.0	0.0
SF3B5	66125	symbol	M. musculus	66125	M. musculus	Sf3b5	splicing factor 3b, subunit 5	GO:0043484 regulation of RNA splicing;GO:0006282 regulation of DNA repair;GO:0000375 RNA splicing, via transesterification reactions		1.0	0.0	0.0	0.0	0.0	0.0	0.0	0.0	0.0	0.0	0.0	0.0	0.0	0.0	0.0	0.0	0.0	0.0	0.0	0.0
SGSH	27029	symbol	M. musculus	27029	M. musculus	Sgsh	N-sulfoglucosamine sulfohydrolase (sulfamidase)	GO:0030200 heparan sulfate proteoglycan catabolic process;GO:0030201 heparan sulfate proteoglycan metabolic process;GO:0030167 proteoglycan catabolic process		0.0	0.0	0.0	0.0	0.0	0.0	0.0	0.0	0.0	0.0	0.0	0.0	1.0	0.0	0.0	0.0	0.0	0.0	1.0	0.0
SGSM2	97761	symbol	M. musculus	97761	M. musculus	Sgsm2	small G protein signaling modulator 2	GO:0034499 late endosome to Golgi transport;GO:0042147 retrograde transport, endosome to Golgi;GO:0090630 activation of GTPase activity		0.0	0.0	0.0	0.0	0.0	0.0	0.0	0.0	0.0	0.0	0.0	0.0	0.0	0.0	0.0	0.0	0.0	0.0	0.0	0.0
SH3BGRL3	73723	symbol	M. musculus	73723	M. musculus	Sh3bgrl3	SH3 domain binding glutamic acid-rich protein-like 3	GO:0007010 cytoskeleton organization;GO:0006996 organelle organization;GO:0016043 cellular component organization		0.0	0.0	0.0	0.0	0.0	0.0	0.0	0.0	0.0	0.0	0.0	0.0	0.0	0.0	0.0	0.0	0.0	0.0	0.0	0.0
SH3BP2	24055	symbol	M. musculus	24055	M. musculus	Sh3bp2	SH3-domain binding protein 2	GO:0007165 signal transduction;GO:0023052 signaling;GO:0007154 cell communication		0.0	0.0	0.0	0.0	0.0	0.0	0.0	0.0	0.0	0.0	0.0	0.0	0.0	0.0	0.0	0.0	0.0	0.0	0.0	0.0
SH3D19	27059	symbol	M. musculus	27059	M. musculus	Sh3d19	SH3 domain protein D19	GO:0051044 positive regulation of membrane protein ectodomain proteolysis;GO:0051043 regulation of membrane protein ectodomain proteolysis;GO:0045732 positive regulation of protein catabolic process		0.0	0.0	0.0	0.0	0.0	0.0	0.0	0.0	0.0	0.0	0.0	0.0	0.0	0.0	1.0	0.0	0.0	0.0	0.0	0.0
SH3PXD2B	268396	symbol	M. musculus	268396	M. musculus	Sh3pxd2b	SH3 and PX domains 2B	GO:0060378 regulation of brood size;GO:0002051 osteoblast fate commitment;GO:0071800 podosome assembly		0.0	0.0	0.0	0.0	0.0	0.0	0.0	0.0	0.0	0.0	0.0	0.0	0.0	0.0	0.0	0.0	0.0	0.0	0.0	0.0
SHMT2	108037	symbol	M. musculus	108037	M. musculus	Shmt2	serine hydroxymethyltransferase 2 (mitochondrial)	GO:0019264 glycine biosynthetic process from serine;GO:0006564 L-serine biosynthetic process;GO:0006545 glycine biosynthetic process		0.0	0.0	0.0	0.0	0.0	0.0	0.0	0.0	0.0	0.0	1.0	0.0	0.0	0.0	0.0	0.0	0.0	0.0	0.0	0.0
SHTN1	71653	symbol	M. musculus	71653	M. musculus	Shtn1	shootin 1	GO:0061163 endoplasmic reticulum polarization;GO:0061573 actin filament bundle retrograde transport;GO:0060327 cytoplasmic actin-based contraction involved in cell motility		0.0	0.0	0.0	0.0	0.0	0.0	0.0	1.0	0.0	0.0	0.0	0.0	0.0	0.0	0.0	0.0	1.0	0.0	0.0	0.0
SIAE	22619	symbol	M. musculus	22619	M. musculus	Siae	sialic acid acetylesterase	GO:0005975 carbohydrate metabolic process;GO:0002682 regulation of immune system process;GO:0044238 primary metabolic process		0.0	0.0	0.0	0.0	0.0	0.0	0.0	0.0	0.0	0.0	0.0	0.0	0.0	0.0	0.0	0.0	0.0	0.0	1.0	0.0
SIGIRR	24058	symbol	M. musculus	24058	M. musculus	Sigirr	single immunoglobulin and toll-interleukin 1 receptor (TIR) domain	GO:0006953 acute-phase response;GO:0032682 negative regulation of chemokine production;GO:0002526 acute inflammatory response		0.0	0.0	0.0	0.0	1.0	0.0	0.0	0.0	0.0	0.0	0.0	0.0	0.0	0.0	0.0	0.0	0.0	0.0	0.0	0.0
SIGLEC8						None	None	None	None	nan	nan	nan	nan	nan	nan	nan	nan	nan	nan	nan	nan	nan	nan	nan	nan	nan	nan	nan	nan
SIGMAR1	18391	symbol	M. musculus	18391	M. musculus	Sigmar1	sigma non-opioid intracellular receptor 1	GO:0070207 protein homotrimerization;GO:0070206 protein trimerization;GO:0051260 protein homooligomerization		0.0	0.0	0.0	0.0	0.0	0.0	0.0	0.0	0.0	0.0	0.0	0.0	0.0	1.0	0.0	0.0	0.0	0.0	0.0	0.0
SIK1	17691	symbol	M. musculus	17691	M. musculus	Sik1	salt inducible kinase 1	GO:0010868 negative regulation of triglyceride biosynthetic process;GO:0032792 negative regulation of CREB transcription factor activity;GO:2000210 positive regulation of anoikis	yes	0.0	0.0	0.0	0.0	0.0	0.0	0.0	0.0	0.0	0.0	0.0	1.0	0.0	0.0	0.0	0.0	0.0	0.0	0.0	0.0
SIK3	70661	symbol	M. musculus	70661	M. musculus	Sik3	SIK family kinase 3	GO:1904515 positive regulation of TORC2 signaling;GO:1903939 regulation of TORC2 signaling;GO:0001958 endochondral ossification	yes	0.0	0.0	0.0	0.0	0.0	0.0	0.0	0.0	0.0	0.0	0.0	0.0	0.0	0.0	0.0	0.0	0.0	0.0	0.0	0.0
SLAMF9	98365	symbol	M. musculus	98365	M. musculus	Slamf9	SLAM family member 9	GO:0002371 dendritic cell cytokine production;GO:0002373 plasmacytoid dendritic cell cytokine production;GO:0002410 plasmacytoid dendritic cell chemotaxis		0.0	0.0	0.0	1.0	0.0	1.0	0.0	0.0	0.0	0.0	0.0	0.0	0.0	0.0	0.0	1.0	0.0	0.0	0.0	0.0
SLC10A6	75750	symbol	M. musculus	75750	M. musculus	Slc10a6	solute carrier family 10 (sodium/bile acid cotransporter family), member 6	GO:0043251 sodium-dependent organic anion transport;GO:0015721 bile acid and bile salt transport;GO:0015718 monocarboxylic acid transport		0.0	0.0	1.0	0.0	0.0	0.0	0.0	0.0	0.0	0.0	0.0	0.0	0.0	1.0	0.0	0.0	0.0	0.0	0.0	0.0
SLC11A1	18173	symbol	M. musculus	18173	M. musculus	Slc11a1	solute carrier family 11 (proton-coupled divalent metal ion transporters), member 1	GO:0015707 nitrite transport;GO:0045342 MHC class II biosynthetic process;GO:0098849 cellular detoxification of cadmium ion		0.0	1.0	1.0	0.0	1.0	1.0	1.0	0.0	1.0	0.0	1.0	0.0	1.0	0.0	0.0	1.0	0.0	0.0	0.0	0.0
SLC12A7	20499	symbol	M. musculus	20499	M. musculus	Slc12a7	solute carrier family 12, member 7	GO:0140157 ammonium import across plasma membrane;GO:0072488 ammonium transmembrane transport;GO:0055064 chloride ion homeostasis		0.0	0.0	1.0	0.0	0.0	0.0	1.0	0.0	0.0	0.0	0.0	0.0	0.0	0.0	0.0	0.0	0.0	0.0	0.0	0.0
SLC13A3	114644	symbol	M. musculus	114644	M. musculus	Slc13a3	solute carrier family 13 (sodium-dependent dicarboxylate transporter), member 3	GO:0006842 tricarboxylic acid transport;GO:0015746 citrate transport;GO:0034775 glutathione transmembrane transport		0.0	0.0	1.0	0.0	0.0	0.0	0.0	0.0	0.0	0.0	0.0	0.0	0.0	0.0	0.0	0.0	0.0	0.0	0.0	0.0
SLC1A2	20511	symbol	M. musculus	20511	M. musculus	Slc1a2	solute carrier family 1 (glial high affinity glutamate transporter), member 2	GO:0070778 L-aspartate transmembrane transport;GO:0070777 D-aspartate transmembrane transport;GO:0070779 D-aspartate import across plasma membrane		0.0	0.0	1.0	0.0	0.0	0.0	1.0	0.0	0.0	0.0	0.0	0.0	0.0	0.0	0.0	0.0	0.0	0.0	0.0	0.0
SLC1A5	20514	symbol	M. musculus	20514	M. musculus	Slc1a5	solute carrier family 1 (neutral amino acid transporter), member 5	GO:0010585 glutamine secretion;GO:1903803 L-glutamine import across plasma membrane;GO:0015825 L-serine transport		0.0	0.0	0.0	0.0	0.0	0.0	1.0	0.0	0.0	0.0	0.0	0.0	0.0	0.0	0.0	0.0	0.0	0.0	0.0	0.0
SLC25A1	13358	symbol	M. musculus	13358	M. musculus	Slc25a1	solute carrier family 25 (mitochondrial carrier, citrate transporter), member 1	GO:0006843 mitochondrial citrate transmembrane transport;GO:1990546 mitochondrial tricarboxylic acid transmembrane transport;GO:0035674 tricarboxylic acid transmembrane transport		0.0	0.0	1.0	0.0	0.0	0.0	0.0	0.0	0.0	0.0	0.0	0.0	0.0	0.0	0.0	0.0	0.0	0.0	0.0	0.0
SLC25A10	27376	symbol	M. musculus	27376	M. musculus	Slc25a10	solute carrier family 25 (mitochondrial carrier, dicarboxylate transporter), member 10	GO:0015709 thiosulfate transport;GO:0015743 malate transport;GO:0071423 malate transmembrane transport		0.0	0.0	1.0	0.0	0.0	0.0	0.0	0.0	0.0	0.0	0.0	0.0	0.0	1.0	0.0	0.0	0.0	0.0	1.0	0.0
SLC26A11	268512	symbol	M. musculus	268512	M. musculus	Slc26a11	solute carrier family 26, member 11	GO:0008272 sulfate transport;GO:0072348 sulfur compound transport;GO:0015698 inorganic anion transport		0.0	0.0	1.0	0.0	0.0	0.0	0.0	0.0	0.0	0.0	0.0	0.0	0.0	0.0	0.0	0.0	0.0	0.0	0.0	0.0
SLC2A6	227659	symbol	M. musculus	227659	M. musculus	Slc2a6	solute carrier family 2 (facilitated glucose transporter), member 6	GO:0006110 regulation of glycolytic process;GO:0030811 regulation of nucleotide catabolic process;GO:0033121 regulation of purine nucleotide catabolic process		0.0	0.0	1.0	0.0	0.0	0.0	0.0	0.0	0.0	0.0	0.0	0.0	0.0	0.0	0.0	0.0	0.0	0.0	0.0	0.0
SLC30A1	22782	symbol	M. musculus	22782	M. musculus	Slc30a1	solute carrier family 30 (zinc transporter), member 1	GO:0071581 regulation of zinc ion transmembrane import;GO:0071584 negative regulation of zinc ion transmembrane import;GO:0071580 regulation of zinc ion transmembrane transport		0.0	0.0	1.0	0.0	0.0	0.0	0.0	0.0	0.0	0.0	0.0	0.0	0.0	0.0	0.0	0.0	0.0	0.0	0.0	0.0
SLC35C1	228368	symbol	M. musculus	228368	M. musculus	Slc35c1	solute carrier family 35, member C1	GO:0015783 GDP-fucose transmembrane transport;GO:0036085 GDP-fucose import into Golgi lumen;GO:0090480 purine nucleotide-sugar transmembrane transport		0.0	0.0	1.0	0.0	0.0	0.0	0.0	0.0	0.0	0.0	0.0	0.0	0.0	0.0	0.0	0.0	0.0	0.0	0.0	0.0
SLC35D2	70484	symbol	M. musculus	70484	M. musculus	Slc35d2	solute carrier family 35, member D2	GO:0015786 UDP-glucose transmembrane transport;GO:0090481 pyrimidine nucleotide-sugar transmembrane transport;GO:0015780 nucleotide-sugar transmembrane transport		0.0	0.0	1.0	0.0	0.0	0.0	0.0	0.0	0.0	0.0	0.0	0.0	0.0	0.0	0.0	0.0	0.0	0.0	0.0	0.0
SLC35F6	74919	symbol	M. musculus	74919	M. musculus	Slc35f6	solute carrier family 35, member F6	GO:1901029 negative regulation of mitochondrial outer membrane permeabilization involved in apoptotic signaling pathway;GO:0035795 negative regulation of mitochondrial membrane permeability;GO:1901028 regulation of mitochondrial outer membrane permeabilization involved in apoptotic signaling pathway		0.0	0.0	0.0	0.0	0.0	0.0	0.0	0.0	0.0	0.0	0.0	0.0	0.0	0.0	0.0	0.0	0.0	1.0	0.0	0.0
SLC37A1	224674	symbol	M. musculus	224674	M. musculus	Slc37a1	solute carrier family 37 (glycerol-3-phosphate transporter), member 1	GO:0015712 hexose phosphate transport;GO:0015760 glucose-6-phosphate transport;GO:0035435 phosphate ion transmembrane transport		0.0	0.0	0.0	0.0	0.0	0.0	0.0	0.0	0.0	0.0	0.0	0.0	0.0	0.0	0.0	0.0	0.0	0.0	0.0	0.0
SLC38A7	234595	symbol	M. musculus	234595	M. musculus	Slc38a7	solute carrier family 38, member 7	GO:0006867 asparagine transport;GO:0006868 glutamine transport;GO:0015804 neutral amino acid transport		0.0	0.0	0.0	0.0	0.0	0.0	0.0	0.0	0.0	0.0	0.0	0.0	0.0	0.0	0.0	0.0	0.0	0.0	0.0	0.0
SLC3A2	17254	symbol	M. musculus	17254	M. musculus	Slc3a2	solute carrier family 3 (activators of dibasic and neutral amino acid transport), member 2	GO:0015828 tyrosine transport;GO:0015821 methionine transport;GO:0015823 phenylalanine transport		0.0	0.0	1.0	0.0	0.0	0.0	1.0	0.0	0.0	0.0	0.0	0.0	0.0	0.0	0.0	0.0	0.0	0.0	1.0	0.0
SLC41A2	338365	symbol	M. musculus	338365	M. musculus	Slc41a2	solute carrier family 41, member 2	GO:0015675 nickel cation transport;GO:0006824 cobalt ion transport;GO:0006828 manganese ion transport		0.0	0.0	1.0	0.0	0.0	0.0	0.0	0.0	0.0	0.0	0.0	0.0	0.0	0.0	0.0	0.0	0.0	0.0	0.0	0.0
SLC44A1	100434	symbol	M. musculus	100434	M. musculus	Slc44a1	solute carrier family 44, member 1	GO:0034229 ethanolamine transport;GO:0015871 choline transport;GO:0015837 amine transport		0.0	0.0	1.0	0.0	0.0	0.0	0.0	0.0	0.0	0.0	0.0	0.0	0.0	0.0	0.0	0.0	0.0	0.0	0.0	0.0
SLC45A4	106068	symbol	M. musculus	106068	M. musculus	Slc45a4	solute carrier family 45, member 4	GO:0015766 disaccharide transport;GO:0015770 sucrose transport;GO:0015772 oligosaccharide transport		0.0	0.0	0.0	0.0	0.0	0.0	0.0	0.0	0.0	0.0	0.0	0.0	0.0	0.0	0.0	0.0	0.0	0.0	0.0	0.0
SLC48A1	67739	symbol	M. musculus	67739	M. musculus	Slc48a1	solute carrier family 48 (heme transporter), member 1	GO:0140357 heme export from vacuole to cytoplasm;GO:0097037 heme export;GO:0035351 heme transmembrane transport		0.0	0.0	0.0	0.0	0.0	0.0	1.0	0.0	0.0	0.0	0.0	0.0	0.0	0.0	0.0	0.0	0.0	0.0	0.0	0.0
SLC4A1	20533	symbol	M. musculus	20533	M. musculus	Slc4a1	solute carrier family 4 (anion exchanger), member 1	GO:0045852 pH elevation;GO:0010037 response to carbon dioxide;GO:1904538 regulation of glycolytic process through fructose-6-phosphate		0.0	0.0	1.0	0.0	0.0	0.0	0.0	0.0	0.0	0.0	0.0	0.0	0.0	1.0	0.0	0.0	0.0	0.0	0.0	0.0
SLC4A2	20535	symbol	M. musculus	20535	M. musculus	Slc4a2	solute carrier family 4 (anion exchanger), member 2	GO:2000565 negative regulation of CD8-positive, alpha-beta T cell proliferation;GO:0043377 negative regulation of CD8-positive, alpha-beta T cell differentiation;GO:0070175 positive regulation of enamel mineralization		0.0	0.0	1.0	0.0	0.0	0.0	0.0	0.0	0.0	0.0	0.0	0.0	0.0	0.0	0.0	1.0	0.0	0.0	0.0	0.0
SLC7A2	11988	symbol	M. musculus	11988	M. musculus	Slc7a2	solute carrier family 7 (cationic amino acid transporter, y+ system), member 2	GO:0002537 nitric oxide production involved in inflammatory response;GO:0097638 L-arginine import across plasma membrane;GO:1903352 L-ornithine transmembrane transport		0.0	0.0	0.0	0.0	1.0	0.0	1.0	0.0	0.0	0.0	0.0	0.0	0.0	0.0	0.0	1.0	0.0	0.0	0.0	0.0
SLC7A4	224022	symbol	M. musculus	224022	M. musculus	Slc7a4	solute carrier family 7 (cationic amino acid transporter, y+ system), member 4	GO:0006865 amino acid transport;GO:0055085 transmembrane transport;GO:0006810 transport		0.0	0.0	0.0	0.0	0.0	0.0	0.0	0.0	0.0	0.0	0.0	0.0	0.0	0.0	0.0	0.0	0.0	0.0	0.0	0.0
SLC9A4	110895	symbol	M. musculus	110895	M. musculus	Slc9a4	solute carrier family 9 (sodium/hydrogen exchanger), member 4	GO:0070634 transepithelial ammonium transport;GO:0001696 gastric acid secretion;GO:0098719 sodium ion import across plasma membrane		0.0	0.0	1.0	0.0	0.0	0.0	1.0	0.0	0.0	0.0	0.0	0.0	0.0	0.0	0.0	0.0	0.0	0.0	0.0	0.0
SLC9A9	331004	symbol	M. musculus	331004	M. musculus	Slc9a9	solute carrier family 9 (sodium/hydrogen exchanger), member 9	GO:0098719 sodium ion import across plasma membrane;GO:0090382 phagosome maturation;GO:0051453 regulation of intracellular pH		0.0	0.0	1.0	0.0	0.0	0.0	1.0	0.0	0.0	0.0	0.0	0.0	0.0	0.0	0.0	0.0	0.0	0.0	0.0	0.0
SLFN12						None	None	None	None	nan	nan	nan	nan	nan	nan	nan	nan	nan	nan	nan	nan	nan	nan	nan	nan	nan	nan	nan	nan
SMAGP	207818	symbol	M. musculus	207818	M. musculus	Smagp	small cell adhesion glycoprotein			0.0	0.0	0.0	0.0	0.0	0.0	0.0	0.0	0.0	0.0	0.0	0.0	0.0	0.0	0.0	0.0	0.0	0.0	0.0	0.0
SMC4	70099	symbol	M. musculus	70099	M. musculus	Smc4	structural maintenance of chromosomes 4	GO:1905821 positive regulation of chromosome condensation;GO:0010032 meiotic chromosome condensation;GO:0060623 regulation of chromosome condensation		0.0	0.0	0.0	0.0	0.0	0.0	0.0	0.0	0.0	0.0	0.0	0.0	0.0	0.0	0.0	0.0	0.0	0.0	0.0	0.0
SMIM14	68552	symbol	M. musculus	68552	M. musculus	Smim14	small integral membrane protein 14	GO:0001835 blastocyst hatching;GO:0035188 hatching;GO:0071684 organism emergence from protective structure		0.0	0.0	0.0	0.0	0.0	0.0	0.0	0.0	0.0	0.0	0.0	0.0	0.0	0.0	0.0	0.0	0.0	0.0	0.0	0.0
SMIM24	72273	symbol	M. musculus	72273	M. musculus	Smim24	small integral membrane protein 24	GO:0008150 biological_process		0.0	0.0	0.0	0.0	0.0	0.0	0.0	0.0	0.0	0.0	0.0	0.0	0.0	0.0	0.0	0.0	0.0	0.0	0.0	0.0
SMIM29	106672	symbol	M. musculus	106672	M. musculus	Smim29	small integral membrane protein 29	GO:0008150 biological_process		0.0	0.0	0.0	0.0	0.0	0.0	0.0	0.0	0.0	0.0	0.0	0.0	0.0	0.0	0.0	0.0	0.0	0.0	0.0	0.0
SMIM3	106878	symbol	M. musculus	106878	M. musculus	Smim3	small integral membrane protein 3	GO:0008150 biological_process		0.0	0.0	0.0	0.0	0.0	0.0	0.0	0.0	0.0	0.0	0.0	0.0	0.0	0.0	0.0	0.0	0.0	0.0	0.0	0.0
SNRPB	20638	symbol	M. musculus	20638	M. musculus	Snrpb	small nuclear ribonucleoprotein B	GO:0000387 spliceosomal snRNP assembly;GO:0006479 protein methylation;GO:0008213 protein alkylation		1.0	0.0	0.0	0.0	0.0	0.0	0.0	0.0	0.0	0.0	0.0	0.0	0.0	0.0	0.0	0.0	0.0	0.0	0.0	0.0
SNX3	54198	symbol	M. musculus	54198	M. musculus	Snx3	sorting nexin 3	GO:0070676 intralumenal vesicle formation;GO:2000642 negative regulation of early endosome to late endosome transport;GO:0022615 protein to membrane docking		0.0	0.0	0.0	0.0	0.0	0.0	0.0	0.0	0.0	0.0	0.0	0.0	0.0	0.0	0.0	0.0	0.0	1.0	0.0	0.0
SNX8	231834	symbol	M. musculus	231834	M. musculus	Snx8	sorting nexin 8	GO:0034498 early endosome to Golgi transport;GO:0042147 retrograde transport, endosome to Golgi;GO:0016482 cytosolic transport		0.0	0.0	0.0	0.0	0.0	0.0	0.0	0.0	0.0	0.0	0.0	0.0	0.0	0.0	0.0	0.0	0.0	0.0	0.0	0.0
SOAT1	20652	symbol	M. musculus	20652	M. musculus	Soat1	sterol O-acyltransferase 1	GO:0042986 positive regulation of amyloid precursor protein biosynthetic process;GO:0010742 macrophage derived foam cell differentiation;GO:0010878 cholesterol storage		0.0	0.0	1.0	0.0	0.0	0.0	0.0	0.0	0.0	0.0	0.0	0.0	0.0	1.0	0.0	0.0	0.0	0.0	0.0	0.0
SORBS3	20410	symbol	M. musculus	20410	M. musculus	Sorbs3	sorbin and SH3 domain containing 3	GO:0051496 positive regulation of stress fiber assembly;GO:0032233 positive regulation of actin filament bundle assembly;GO:0051492 regulation of stress fiber assembly		0.0	0.0	0.0	0.0	0.0	0.0	0.0	0.0	0.0	0.0	0.0	0.0	0.0	0.0	0.0	0.0	1.0	0.0	0.0	0.0
SORL1	20660	symbol	M. musculus	20660	M. musculus	Sorl1	sortilin-related receptor, LDLR class A repeats-containing	GO:1902955 positive regulation of early endosome to recycling endosome transport;GO:1902997 negative regulation of neurofibrillary tangle assembly;GO:1900166 regulation of glial cell-derived neurotrophic factor production		0.0	0.0	0.0	0.0	0.0	0.0	1.0	0.0	1.0	0.0	0.0	0.0	0.0	0.0	0.0	0.0	0.0	1.0	0.0	0.0
SP110	109032	symbol	M. musculus	109032	M. musculus	Sp110	Sp110 nuclear body protein	GO:0043065 positive regulation of apoptotic process;GO:0043068 positive regulation of programmed cell death;GO:0045087 innate immune response		0.0	0.0	0.0	0.0	0.0	0.0	0.0	0.0	0.0	0.0	1.0	1.0	0.0	0.0	0.0	0.0	0.0	0.0	0.0	0.0
SP140	434484	symbol	M. musculus	434484	M. musculus	Sp140	Sp140 nuclear body protein			0.0	0.0	0.0	0.0	0.0	0.0	0.0	0.0	0.0	0.0	0.0	0.0	0.0	0.0	0.0	0.0	0.0	0.0	0.0	0.0
SPATA6	67946	symbol	M. musculus	67946	M. musculus	Spata6	spermatogenesis associated 6	GO:0044458 motile cilium assembly;GO:0060271 cilium assembly;GO:0044782 cilium organization		0.0	0.0	0.0	0.0	0.0	0.0	0.0	0.0	0.0	0.0	0.0	0.0	0.0	0.0	0.0	0.0	0.0	0.0	0.0	0.0
SPG21	27965	symbol	M. musculus	27965	M. musculus	Spg21	SPG21, maspardin	GO:0048668 collateral sprouting;GO:0070849 response to epidermal growth factor;GO:0007173 epidermal growth factor receptor signaling pathway		0.0	0.0	0.0	0.0	0.0	0.0	0.0	0.0	0.0	0.0	0.0	0.0	0.0	0.0	0.0	0.0	0.0	0.0	0.0	0.0
SPIC	20728	symbol	M. musculus	20728	M. musculus	Spic	Spi-C transcription factor (Spi-1/PU.1 related)	GO:0001824 blastocyst development;GO:0001701 in utero embryonic development;GO:0043009 chordate embryonic development		0.0	0.0	0.0	0.0	0.0	0.0	0.0	0.0	0.0	0.0	0.0	0.0	0.0	0.0	0.0	0.0	0.0	0.0	0.0	0.0
SPN	20737	symbol	M. musculus	20737	M. musculus	Spn	sialophorin	GO:0001808 negative regulation of type IV hypersensitivity;GO:0002884 negative regulation of hypersensitivity;GO:0001807 regulation of type IV hypersensitivity		0.0	0.0	0.0	1.0	0.0	1.0	0.0	1.0	1.0	0.0	1.0	1.0	0.0	0.0	0.0	1.0	0.0	0.0	0.0	0.0
SPOUT1	227695	symbol	M. musculus	227695	M. musculus	Spout1	SPOUT domain containing methyltransferase 1	GO:0051661 maintenance of centrosome location;GO:0051657 maintenance of organelle location;GO:0035196 miRNA processing		0.0	0.0	0.0	0.0	0.0	0.0	0.0	0.0	0.0	0.0	0.0	0.0	0.0	0.0	0.0	0.0	0.0	0.0	0.0	0.0
SPP1	20750	symbol	M. musculus	20750	M. musculus	Spp1	secreted phosphoprotein 1	GO:0034418 urate biosynthetic process;GO:2000866 positive regulation of estradiol secretion;GO:0006710 androgen catabolic process		0.0	0.0	0.0	1.0	0.0	0.0	0.0	0.0	0.0	0.0	0.0	0.0	0.0	0.0	0.0	0.0	0.0	0.0	1.0	0.0
SPRED2	114716	symbol	M. musculus	114716	M. musculus	Spred2	sprouty-related EVH1 domain containing 2	GO:1902747 negative regulation of lens fiber cell differentiation;GO:1902746 regulation of lens fiber cell differentiation;GO:0043517 positive regulation of DNA damage response, signal transduction by p53 class mediator		0.0	0.0	0.0	0.0	0.0	0.0	0.0	0.0	0.0	0.0	0.0	0.0	0.0	0.0	0.0	0.0	0.0	0.0	0.0	0.0
SPRYD3	223918	symbol	M. musculus	223918	M. musculus	Spryd3	SPRY domain containing 3			0.0	0.0	0.0	0.0	0.0	0.0	0.0	0.0	0.0	0.0	0.0	0.0	0.0	0.0	0.0	0.0	0.0	0.0	0.0	0.0
SPTBN1	20742	symbol	M. musculus	20742	M. musculus	Sptbn1	spectrin beta, non-erythrocytic 1	GO:0021556 central nervous system formation;GO:0021551 central nervous system morphogenesis;GO:0043001 Golgi to plasma membrane protein transport		0.0	0.0	0.0	0.0	0.0	0.0	0.0	0.0	1.0	0.0	0.0	0.0	0.0	0.0	0.0	0.0	0.0	1.0	0.0	0.0
SQSTM1	18412	symbol	M. musculus	18412	M. musculus	Sqstm1	sequestosome 1	GO:0070342 brown fat cell proliferation;GO:0070341 fat cell proliferation;GO:0000425 pexophagy		0.0	0.0	0.0	0.0	0.0	0.0	0.0	0.0	0.0	1.0	1.0	0.0	0.0	0.0	0.0	0.0	0.0	0.0	0.0	0.0
SRGN	19073	symbol	M. musculus	19073	M. musculus	Srgn	serglycin	GO:0033371 T cell secretory granule organization;GO:0033367 protein localization to mast cell secretory granule;GO:0033368 protease localization to mast cell secretory granule		0.0	0.0	0.0	0.0	0.0	0.0	0.0	0.0	0.0	0.0	0.0	0.0	0.0	0.0	0.0	0.0	0.0	0.0	0.0	0.0
SSH3	245857	symbol	M. musculus	245857	M. musculus	Ssh3	slingshot protein phosphatase 3	GO:0030837 negative regulation of actin filament polymerization;GO:0032272 negative regulation of protein polymerization;GO:0030833 regulation of actin filament polymerization		0.0	0.0	0.0	0.0	0.0	0.0	0.0	0.0	0.0	0.0	0.0	0.0	0.0	0.0	0.0	0.0	0.0	1.0	0.0	0.0
ST3GAL1	20442	symbol	M. musculus	20442	M. musculus	St3gal1	ST3 beta-galactoside alpha-2,3-sialyltransferase 1	GO:0002319 memory B cell differentiation;GO:0090715 immunological memory formation process;GO:1905403 negative regulation of activated CD8-positive, alpha-beta T cell apoptotic process		0.0	0.0	0.0	0.0	0.0	0.0	0.0	0.0	0.0	0.0	0.0	0.0	0.0	0.0	0.0	1.0	0.0	0.0	0.0	0.0
ST6GAL1	20440	symbol	M. musculus	20440	M. musculus	St6gal1	beta galactoside alpha 2,6 sialyltransferase 1	GO:2000110 negative regulation of macrophage apoptotic process;GO:0097503 sialylation;GO:2000109 regulation of macrophage apoptotic process		0.0	0.0	0.0	0.0	0.0	0.0	0.0	1.0	0.0	0.0	0.0	0.0	0.0	0.0	0.0	0.0	0.0	0.0	0.0	0.0
ST8SIA4	20452	symbol	M. musculus	20452	M. musculus	St8sia4	ST8 alpha-N-acetyl-neuraminide alpha-2,8-sialyltransferase 4	GO:0097503 sialylation;GO:0006491 N-glycan processing;GO:0001574 ganglioside biosynthetic process		0.0	0.0	0.0	0.0	0.0	0.0	0.0	0.0	0.0	0.0	0.0	0.0	0.0	0.0	0.0	0.0	0.0	0.0	1.0	0.0
STAB1	192187	symbol	M. musculus	192187	M. musculus	Stab1	stabilin 1	GO:0016525 negative regulation of angiogenesis;GO:2000181 negative regulation of blood vessel morphogenesis;GO:1901343 negative regulation of vasculature development		0.0	0.0	0.0	0.0	1.0	0.0	0.0	0.0	0.0	0.0	0.0	0.0	0.0	0.0	0.0	0.0	0.0	0.0	0.0	0.0
STARD8	236920	symbol	M. musculus	236920	M. musculus	Stard8	StAR related lipid transfer domain containing 8	GO:0035023 regulation of Rho protein signal transduction;GO:0051056 regulation of small GTPase mediated signal transduction;GO:0030036 actin cytoskeleton organization		0.0	0.0	0.0	0.0	0.0	0.0	0.0	0.0	0.0	0.0	0.0	0.0	0.0	0.0	0.0	0.0	0.0	0.0	0.0	0.0
STEAP3	68428	symbol	M. musculus	68428	M. musculus	Steap3	STEAP family member 3	GO:0098706 iron ion import across cell outer membrane;GO:1902167 positive regulation of intrinsic apoptotic signaling pathway in response to DNA damage by p53 class mediator;GO:1990182 exosomal secretion		0.0	0.0	1.0	0.0	0.0	0.0	0.0	0.0	0.0	0.0	0.0	1.0	0.0	0.0	0.0	0.0	0.0	0.0	0.0	0.0
STIM2	116873	symbol	M. musculus	116873	M. musculus	Stim2	stromal interaction molecule 2	GO:0032237 activation of store-operated calcium channel activity;GO:1901341 positive regulation of store-operated calcium channel activity;GO:1901339 regulation of store-operated calcium channel activity		0.0	0.0	0.0	0.0	0.0	0.0	0.0	0.0	0.0	0.0	0.0	0.0	0.0	0.0	0.0	0.0	0.0	0.0	0.0	0.0
STOM	13830	symbol	M. musculus	13830	M. musculus	Stom	stomatin	GO:0044829 positive regulation by host of viral genome replication;GO:0044794 positive regulation by host of viral process;GO:0044827 modulation by host of viral genome replication		0.0	1.0	1.0	0.0	0.0	0.0	0.0	0.0	0.0	0.0	0.0	0.0	0.0	0.0	0.0	0.0	0.0	0.0	0.0	0.0
STXBP6	217517	symbol	M. musculus	217517	M. musculus	Stxbp6	syntaxin binding protein 6 (amisyn)	GO:0035542 regulation of SNARE complex assembly;GO:0035493 SNARE complex assembly;GO:0006906 vesicle fusion		0.0	0.0	0.0	0.0	0.0	0.0	0.0	0.0	0.0	0.0	0.0	0.0	0.0	0.0	0.0	0.0	0.0	0.0	0.0	0.0
SUPV3L1	338359	symbol	M. musculus	338359	M. musculus	Supv3l1	suppressor of var1, 3-like 1 (S. cerevisiae)	GO:0035945 mitochondrial ncRNA surveillance;GO:0071026 cytoplasmic RNA surveillance;GO:2000827 mitochondrial RNA surveillance		0.0	0.0	0.0	0.0	0.0	0.0	0.0	0.0	0.0	0.0	0.0	0.0	0.0	0.0	0.0	0.0	0.0	0.0	0.0	0.0
SVIP	75744	symbol	M. musculus	75744	M. musculus	Svip	small VCP/p97-interacting protein	GO:1904239 regulation of VCP-NPL4-UFD1 AAA ATPase complex assembly;GO:1904240 negative regulation of VCP-NPL4-UFD1 AAA ATPase complex assembly;GO:1903061 positive regulation of protein lipidation		0.0	1.0	0.0	0.0	0.0	0.0	0.0	0.0	0.0	0.0	0.0	0.0	0.0	0.0	1.0	0.0	0.0	1.0	0.0	0.0
SYMPK	68188	symbol	M. musculus	68188	M. musculus	Sympk	symplekin	GO:0032091 negative regulation of protein binding;GO:0051100 negative regulation of binding;GO:0043393 regulation of protein binding		1.0	0.0	0.0	0.0	0.0	0.0	0.0	0.0	0.0	0.0	0.0	0.0	0.0	0.0	0.0	0.0	0.0	0.0	0.0	0.0
SYNE1	64009	symbol	M. musculus	64009	M. musculus	Syne1	spectrin repeat containing, nuclear envelope 1	GO:0043578 nuclear matrix organization;GO:0090292 nuclear matrix anchoring at nuclear membrane;GO:0051457 maintenance of protein location in nucleus		0.0	0.0	0.0	0.0	0.0	0.0	0.0	0.0	0.0	0.0	0.0	0.0	0.0	0.0	0.0	0.0	0.0	0.0	0.0	0.0
SZRD1	213491	symbol	M. musculus	213491	M. musculus	Szrd1	SUZ RNA binding domain containing 1	GO:0008150 biological_process		0.0	0.0	0.0	0.0	0.0	0.0	0.0	0.0	0.0	0.0	0.0	0.0	0.0	0.0	0.0	0.0	0.0	0.0	0.0	0.0
TAGLN2	21346	symbol	M. musculus	21346	M. musculus	Tagln2	transgelin 2	GO:0007015 actin filament organization;GO:0030036 actin cytoskeleton organization;GO:0030029 actin filament-based process		0.0	0.0	0.0	0.0	0.0	0.0	0.0	0.0	0.0	0.0	0.0	0.0	0.0	0.0	0.0	0.0	0.0	0.0	0.0	0.0
TALDO1	21351	symbol	M. musculus	21351	M. musculus	Taldo1	transaldolase 1	GO:0009052 pentose-phosphate shunt, non-oxidative branch;GO:0006098 pentose-phosphate shunt;GO:0006002 fructose 6-phosphate metabolic process		0.0	0.0	0.0	0.0	0.0	0.0	0.0	0.0	0.0	0.0	0.0	0.0	0.0	0.0	0.0	0.0	0.0	0.0	1.0	0.0
TBC1D12	209478	symbol	M. musculus	209478	M. musculus	Tbc1d12	TBC1D12: TBC1 domain family, member 12	GO:2000785 regulation of autophagosome assembly;GO:0044088 regulation of vacuole organization;GO:0090630 activation of GTPase activity		0.0	0.0	0.0	0.0	0.0	0.0	0.0	0.0	0.0	0.0	0.0	0.0	0.0	0.0	0.0	0.0	0.0	0.0	0.0	0.0
TBC1D22A	223754	symbol	M. musculus	223754	M. musculus	Tbc1d22a	TBC1 domain family, member 22a	GO:0090630 activation of GTPase activity;GO:0043547 positive regulation of GTPase activity;GO:0043087 regulation of GTPase activity		0.0	0.0	0.0	0.0	0.0	0.0	0.0	0.0	0.0	0.0	0.0	0.0	0.0	0.0	0.0	0.0	0.0	0.0	0.0	0.0
TBC1D30	74694	symbol	M. musculus	74694	M. musculus	Tbc1d30	TBC1 domain family, member 30	GO:1902018 negative regulation of cilium assembly;GO:0120033 negative regulation of plasma membrane bounded cell projection assembly;GO:1902116 negative regulation of organelle assembly		0.0	0.0	0.0	0.0	0.0	0.0	0.0	0.0	0.0	0.0	0.0	0.0	0.0	0.0	0.0	0.0	0.0	1.0	0.0	0.0
TBC1D8	54610	symbol	M. musculus	54610	M. musculus	Tbc1d8	TBC1 domain family, member 8	GO:0090630 activation of GTPase activity;GO:0043547 positive regulation of GTPase activity;GO:0043087 regulation of GTPase activity		0.0	0.0	0.0	0.0	0.0	0.0	0.0	0.0	0.0	0.0	0.0	0.0	0.0	0.0	0.0	0.0	0.0	0.0	0.0	0.0
TBRG4	21379	symbol	M. musculus	21379	M. musculus	Tbrg4	transforming growth factor beta regulated gene 4	GO:0090615 mitochondrial mRNA processing;GO:0044528 regulation of mitochondrial mRNA stability;GO:0000963 mitochondrial RNA processing		0.0	0.0	0.0	0.0	0.0	0.0	0.0	0.0	0.0	0.0	0.0	0.0	0.0	0.0	0.0	0.0	0.0	0.0	0.0	0.0
TBXAS1	21391	symbol	M. musculus	21391	M. musculus	Tbxas1	thromboxane A synthase 1, platelet	GO:0030644 intracellular chloride ion homeostasis;GO:0030002 intracellular monoatomic anion homeostasis;GO:0001516 prostaglandin biosynthetic process		0.0	0.0	0.0	0.0	0.0	0.0	0.0	0.0	0.0	0.0	0.0	0.0	0.0	0.0	0.0	0.0	0.0	0.0	0.0	0.0
TCOF1	21453	symbol	M. musculus	21453	M. musculus	Tcof1	treacle ribosome biogenesis factor 1	GO:0042790 nucleolar large rRNA transcription by RNA polymerase I;GO:0014029 neural crest formation;GO:0006360 transcription by RNA polymerase I		0.0	0.0	0.0	0.0	0.0	0.0	0.0	0.0	0.0	0.0	0.0	0.0	0.0	0.0	0.0	0.0	0.0	0.0	0.0	0.0
TEP1	21745	symbol	M. musculus	21745	M. musculus	Tep1	telomerase associated protein 1	GO:0000722 telomere maintenance via recombination;GO:0006312 mitotic recombination;GO:0000723 telomere maintenance		0.0	0.0	0.0	0.0	0.0	0.0	0.0	0.0	0.0	0.0	0.0	0.0	0.0	0.0	0.0	0.0	0.0	0.0	0.0	0.0
TEPSIN	78777	symbol	M. musculus	78777	M. musculus	Tepsin	TEPSIN, adaptor related protein complex 4 accessory protein	GO:0008150 biological_process		0.0	0.0	0.0	0.0	0.0	0.0	0.0	0.0	0.0	0.0	0.0	0.0	0.0	0.0	0.0	0.0	0.0	0.0	0.0	0.0
TF	14066	gene_synonym	M. musculus	14066	M. musculus	F3	coagulation factor III	GO:0002541 activation of plasma proteins involved in acute inflammatory response;GO:0010641 positive regulation of platelet-derived growth factor receptor signaling pathway;GO:0010640 regulation of platelet-derived growth factor receptor signaling pathway		0.0	0.0	0.0	0.0	1.0	0.0	0.0	1.0	1.0	0.0	0.0	0.0	0.0	0.0	1.0	0.0	0.0	0.0	0.0	0.0
TFEC	21426	symbol	M. musculus	21426	M. musculus	Tfec	transcription factor EC	GO:0034605 cellular response to heat;GO:0009408 response to heat;GO:0009266 response to temperature stimulus		0.0	0.0	0.0	0.0	0.0	0.0	0.0	0.0	0.0	0.0	0.0	0.0	0.0	0.0	0.0	0.0	0.0	0.0	0.0	0.0
THBD	21824	symbol	M. musculus	21824	M. musculus	Thbd	thrombomodulin	GO:0050819 negative regulation of coagulation;GO:0050818 regulation of coagulation;GO:0007596 blood coagulation		0.0	0.0	0.0	0.0	0.0	0.0	0.0	0.0	0.0	0.0	0.0	0.0	0.0	0.0	0.0	0.0	0.0	0.0	0.0	0.0
THBS1	21825	symbol	M. musculus	21825	M. musculus	Thbs1	thrombospondin 1	GO:0010751 negative regulation of nitric oxide mediated signal transduction;GO:0002581 negative regulation of antigen processing and presentation of peptide or polysaccharide antigen via MHC class II;GO:0002605 negative regulation of dendritic cell antigen processing and presentation		0.0	0.0	0.0	0.0	1.0	0.0	1.0	1.0	1.0	0.0	1.0	1.0	0.0	0.0	1.0	0.0	1.0	0.0	0.0	0.0
THYN1	77862	symbol	M. musculus	77862	M. musculus	Thyn1	thymocyte nuclear protein 1	GO:0008150 biological_process		0.0	0.0	0.0	0.0	0.0	0.0	0.0	0.0	0.0	0.0	0.0	0.0	0.0	0.0	0.0	0.0	0.0	0.0	0.0	0.0
TIMM17A	21854	symbol	M. musculus	21854	M. musculus	Timm17a	translocase of inner mitochondrial membrane 17a	GO:0030150 protein import into mitochondrial matrix;GO:0010954 positive regulation of protein processing;GO:1903319 positive regulation of protein maturation		0.0	0.0	0.0	0.0	0.0	0.0	0.0	0.0	0.0	0.0	0.0	0.0	0.0	0.0	1.0	0.0	0.0	0.0	0.0	0.0
TIPARP	99929	symbol	M. musculus	99929	M. musculus	Tiparp	TCDD-inducible poly(ADP-ribose) polymerase	GO:0008209 androgen metabolic process;GO:0048745 smooth muscle tissue development;GO:0008210 estrogen metabolic process		0.0	0.0	0.0	0.0	0.0	0.0	0.0	0.0	0.0	0.0	0.0	0.0	0.0	0.0	0.0	0.0	0.0	0.0	0.0	0.0
TKT	21881	symbol	M. musculus	21881	M. musculus	Tkt	transketolase	GO:0009052 pentose-phosphate shunt, non-oxidative branch;GO:0051167 xylulose 5-phosphate metabolic process;GO:1901159 xylulose 5-phosphate biosynthetic process		0.0	0.0	0.0	0.0	0.0	0.0	0.0	0.0	0.0	0.0	0.0	0.0	0.0	0.0	0.0	0.0	0.0	0.0	1.0	0.0
TLE1	21885	symbol	M. musculus	21885	M. musculus	Tle1	transducin-like enhancer of split 1	GO:2000811 negative regulation of anoikis;GO:2000209 regulation of anoikis;GO:0043124 negative regulation of canonical NF-kappaB signal transduction		0.0	0.0	0.0	0.0	0.0	0.0	0.0	0.0	0.0	0.0	0.0	0.0	0.0	0.0	0.0	0.0	0.0	0.0	0.0	0.0
TLNRD1	80889	symbol	M. musculus	80889	M. musculus	Tlnrd1	talin rod domain containing 1	GO:0008150 biological_process		0.0	0.0	0.0	0.0	0.0	0.0	0.0	0.0	0.0	0.0	0.0	0.0	0.0	0.0	0.0	0.0	0.0	0.0	0.0	0.0
TLR1	21897	symbol	M. musculus	21897	M. musculus	Tlr1	toll-like receptor 1	GO:0042495 detection of triacyl bacterial lipopeptide;GO:0070340 detection of bacterial lipopeptide;GO:0071725 response to triacyl bacterial lipopeptide		0.0	0.0	0.0	0.0	1.0	0.0	0.0	0.0	1.0	0.0	1.0	0.0	0.0	0.0	0.0	1.0	1.0	0.0	0.0	0.0
TLR2	24088	symbol	M. musculus	24088	M. musculus	Tlr2	toll-like receptor 2	GO:0038124 toll-like receptor TLR6:TLR2 signaling pathway;GO:0042495 detection of triacyl bacterial lipopeptide;GO:0042496 detection of diacyl bacterial lipopeptide		1.0	1.0	0.0	1.0	1.0	1.0	0.0	1.0	1.0	0.0	1.0	0.0	0.0	0.0	0.0	1.0	1.0	1.0	0.0	0.0
TLR8	170744	symbol	M. musculus	170744	M. musculus	Tlr8	toll-like receptor 8	GO:0034158 toll-like receptor 8 signaling pathway;GO:0032695 negative regulation of interleukin-12 production;GO:0032727 positive regulation of interferon-alpha production		1.0	0.0	0.0	0.0	1.0	0.0	0.0	0.0	1.0	0.0	1.0	0.0	0.0	0.0	0.0	0.0	1.0	0.0	0.0	0.0
TMBIM1	69660	symbol	M. musculus	69660	M. musculus	Tmbim1	transmembrane BAX inhibitor motif containing 1	GO:1902045 negative regulation of Fas signaling pathway;GO:2000504 positive regulation of blood vessel remodeling;GO:1902044 regulation of Fas signaling pathway		0.0	1.0	0.0	0.0	0.0	0.0	0.0	0.0	0.0	0.0	0.0	0.0	0.0	0.0	0.0	0.0	0.0	0.0	0.0	0.0
TMCC2	68875	symbol	M. musculus	68875	M. musculus	Tmcc2	transmembrane and coiled-coil domains 2	GO:0042982 amyloid precursor protein metabolic process;GO:0019538 protein metabolic process;GO:1901564 organonitrogen compound metabolic process		0.0	0.0	0.0	0.0	0.0	0.0	0.0	0.0	0.0	0.0	0.0	0.0	0.0	0.0	0.0	0.0	0.0	0.0	0.0	0.0
TMED1	17083	symbol	M. musculus	17083	M. musculus	Tmed1	transmembrane p24 trafficking protein 1	GO:0006888 endoplasmic reticulum to Golgi vesicle-mediated transport;GO:0007030 Golgi organization;GO:0048193 Golgi vesicle transport		0.0	0.0	0.0	0.0	0.0	0.0	0.0	0.0	0.0	0.0	0.0	0.0	0.0	0.0	0.0	0.0	0.0	0.0	0.0	0.0
TMEM106A	217203	symbol	M. musculus	217203	M. musculus	Tmem106a	transmembrane protein 106A	GO:0035780 CD80 biosynthetic process;GO:0035781 CD86 biosynthetic process;GO:0045348 positive regulation of MHC class II biosynthetic process		0.0	0.0	0.0	0.0	0.0	0.0	0.0	0.0	1.0	0.0	1.0	0.0	0.0	0.0	0.0	1.0	0.0	0.0	0.0	0.0
TMEM120B	330189	symbol	M. musculus	330189	M. musculus	Tmem120b	transmembrane protein 120B	GO:0051291 protein heterooligomerization;GO:0045444 fat cell differentiation;GO:0051259 protein complex oligomerization		0.0	0.0	0.0	0.0	0.0	0.0	0.0	0.0	0.0	0.0	0.0	0.0	0.0	0.0	0.0	0.0	0.0	0.0	0.0	0.0
TMEM138	72982	symbol	M. musculus	72982	M. musculus	Tmem138	transmembrane protein 138	GO:0060271 cilium assembly;GO:0044782 cilium organization;GO:0120031 plasma membrane bounded cell projection assembly		0.0	0.0	0.0	0.0	0.0	0.0	0.0	0.0	0.0	0.0	0.0	0.0	0.0	0.0	0.0	0.0	0.0	0.0	0.0	0.0
TMEM141	51875	symbol	M. musculus	51875	M. musculus	Tmem141	transmembrane protein 141			0.0	0.0	0.0	0.0	0.0	0.0	0.0	0.0	0.0	0.0	0.0	0.0	0.0	0.0	0.0	0.0	0.0	0.0	0.0	0.0
TMEM147	69804	symbol	M. musculus	69804	M. musculus	Tmem147	transmembrane protein 147	GO:0036228 protein localization to nuclear inner membrane;GO:0160063 multi-pass transmembrane protein insertion into ER membrane;GO:0090435 protein localization to nuclear envelope		0.0	0.0	0.0	0.0	0.0	0.0	0.0	0.0	0.0	0.0	0.0	0.0	0.0	0.0	0.0	0.0	0.0	0.0	0.0	0.0
TMEM150A	232086	symbol	M. musculus	232086	M. musculus	Tmem150a	transmembrane protein 150A	GO:0046854 phosphatidylinositol phosphate biosynthetic process;GO:0006661 phosphatidylinositol biosynthetic process;GO:0046488 phosphatidylinositol metabolic process		0.0	0.0	0.0	0.0	0.0	0.0	0.0	0.0	0.0	0.0	0.0	0.0	0.0	0.0	0.0	0.0	0.0	0.0	0.0	0.0
TMEM176A	66058	symbol	M. musculus	66058	M. musculus	Tmem176a	transmembrane protein 176A	GO:2001199 negative regulation of dendritic cell differentiation;GO:2001198 regulation of dendritic cell differentiation;GO:1902106 negative regulation of leukocyte differentiation		0.0	0.0	0.0	0.0	0.0	0.0	0.0	0.0	0.0	0.0	0.0	0.0	0.0	0.0	0.0	0.0	0.0	0.0	0.0	0.0
TMEM176B	65963	symbol	M. musculus	65963	M. musculus	Tmem176b	transmembrane protein 176B	GO:2001199 negative regulation of dendritic cell differentiation;GO:2001198 regulation of dendritic cell differentiation;GO:0097028 dendritic cell differentiation		0.0	0.0	0.0	0.0	0.0	0.0	0.0	0.0	0.0	0.0	0.0	0.0	0.0	0.0	0.0	1.0	0.0	0.0	0.0	0.0
TMEM184C	234463	symbol	M. musculus	234463	M. musculus	Tmem184c	transmembrane protein 184C	GO:0006810 transport;GO:0051234 establishment of localization;GO:0051179 localization		0.0	0.0	0.0	0.0	0.0	0.0	0.0	0.0	0.0	0.0	0.0	0.0	0.0	0.0	0.0	0.0	0.0	0.0	0.0	0.0
TMEM19	67226	symbol	M. musculus	67226	M. musculus	Tmem19	transmembrane protein 19	GO:0008150 biological_process		0.0	0.0	0.0	0.0	0.0	0.0	0.0	0.0	0.0	0.0	0.0	0.0	0.0	0.0	0.0	0.0	0.0	0.0	0.0	0.0
TMEM191C	224019	gene_synonym	M. musculus	224019	M. musculus	Tmem191	transmembrane protein 191	GO:0008150 biological_process		0.0	0.0	0.0	0.0	0.0	0.0	0.0	0.0	0.0	0.0	0.0	0.0	0.0	0.0	0.0	0.0	0.0	0.0	0.0	0.0
TMEM205	235043	symbol	M. musculus	235043	M. musculus	Tmem205	transmembrane protein 205	GO:0008150 biological_process		0.0	0.0	0.0	0.0	0.0	0.0	0.0	0.0	0.0	0.0	0.0	0.0	0.0	0.0	0.0	0.0	0.0	0.0	0.0	0.0
TMEM219	68742	symbol	M. musculus	68742	M. musculus	Tmem219	transmembrane protein 219	GO:0006915 apoptotic process;GO:0012501 programmed cell death;GO:0008219 cell death		0.0	0.0	0.0	0.0	0.0	0.0	0.0	0.0	0.0	0.0	0.0	0.0	0.0	0.0	0.0	0.0	0.0	0.0	0.0	0.0
TMEM221	434325	symbol	M. musculus	434325	M. musculus	Tmem221	transmembrane protein 221	GO:0008150 biological_process		0.0	0.0	0.0	0.0	0.0	0.0	0.0	0.0	0.0	0.0	0.0	0.0	0.0	0.0	0.0	0.0	0.0	0.0	0.0	0.0
TMEM258	69038	symbol	M. musculus	69038	M. musculus	Tmem258	transmembrane protein 258	GO:0006487 protein N-linked glycosylation;GO:1904019 epithelial cell apoptotic process;GO:0009306 protein secretion		0.0	0.0	0.0	0.0	1.0	0.0	0.0	0.0	0.0	0.0	0.0	0.0	0.0	0.0	0.0	0.0	0.0	0.0	0.0	0.0
TMEM259	216157	symbol	M. musculus	216157	M. musculus	Tmem259	transmembrane protein 259	GO:1904294 positive regulation of ERAD pathway;GO:1904292 regulation of ERAD pathway;GO:1905898 positive regulation of response to endoplasmic reticulum stress		0.0	0.0	0.0	0.0	0.0	0.0	0.0	0.0	0.0	0.0	0.0	0.0	0.0	0.0	1.0	0.0	0.0	0.0	0.0	0.0
TMEM50B	77975	symbol	M. musculus	77975	M. musculus	Tmem50b	transmembrane protein 50B	GO:0032511 late endosome to vacuole transport via multivesicular body sorting pathway;GO:0045324 late endosome to vacuole transport;GO:0032509 endosome transport via multivesicular body sorting pathway		0.0	0.0	0.0	0.0	0.0	0.0	0.0	0.0	0.0	0.0	0.0	0.0	0.0	0.0	0.0	0.0	0.0	0.0	0.0	0.0
TMEM86A	67893	symbol	M. musculus	67893	M. musculus	Tmem86a	transmembrane protein 86A	GO:0006629 lipid metabolic process;GO:0044238 primary metabolic process;GO:0008152 metabolic process		0.0	0.0	0.0	0.0	0.0	0.0	0.0	0.0	0.0	0.0	0.0	0.0	0.0	0.0	0.0	0.0	0.0	0.0	0.0	0.0
TNFAIP2	21928	symbol	M. musculus	21928	M. musculus	Tnfaip2	tumor necrosis factor, alpha-induced protein 2	GO:0051601 exocyst localization;GO:0031503 protein-containing complex localization;GO:0006887 exocytosis		0.0	0.0	0.0	0.0	0.0	0.0	0.0	0.0	0.0	0.0	0.0	0.0	0.0	0.0	0.0	0.0	0.0	0.0	0.0	0.0
TNFRSF11A	21934	symbol	M. musculus	21934	M. musculus	Tnfrsf11a	tumor necrosis factor receptor superfamily, member 11a, NFKB activator	GO:0071812 positive regulation of fever generation by positive regulation of prostaglandin secretion;GO:0060086 circadian temperature homeostasis;GO:0031622 positive regulation of fever generation		0.0	0.0	0.0	0.0	0.0	0.0	0.0	0.0	0.0	0.0	1.0	0.0	0.0	0.0	0.0	1.0	0.0	0.0	0.0	0.0
TNFSF12	21944	symbol	M. musculus	21944	M. musculus	Tnfsf12	tumor necrosis factor (ligand) superfamily, member 12	GO:0097191 extrinsic apoptotic signaling pathway;GO:0045732 positive regulation of protein catabolic process;GO:0097190 apoptotic signaling pathway		0.0	0.0	0.0	0.0	0.0	0.0	0.0	0.0	0.0	0.0	0.0	1.0	0.0	0.0	0.0	0.0	0.0	0.0	0.0	0.0
TNFSF13	69583	symbol	M. musculus	69583	M. musculus	Tnfsf13	tumor necrosis factor (ligand) superfamily, member 13	GO:0002426 immunoglobulin production in mucosal tissue;GO:0002636 positive regulation of germinal center formation;GO:0048296 regulation of isotype switching to IgA isotypes		1.0	0.0	0.0	0.0	0.0	1.0	0.0	0.0	0.0	0.0	1.0	0.0	0.0	0.0	0.0	1.0	0.0	0.0	0.0	0.0
TNIK	665113	symbol	M. musculus	665113	M. musculus	Tnik	TRAF2 and NCK interacting kinase	GO:0030033 microvillus assembly;GO:0032528 microvillus organization;GO:0098696 regulation of neurotransmitter receptor localization to postsynaptic specialization membrane	yes	0.0	0.0	0.0	0.0	0.0	0.0	0.0	0.0	0.0	1.0	0.0	0.0	0.0	0.0	0.0	0.0	1.0	0.0	0.0	0.0
TNIP1	57783	symbol	M. musculus	57783	M. musculus	Tnip1	TNFAIP3 interacting protein 1	GO:1903003 positive regulation of protein deubiquitination;GO:0002755 MyD88-dependent toll-like receptor signaling pathway;GO:0090085 regulation of protein deubiquitination		0.0	0.0	0.0	0.0	1.0	0.0	0.0	0.0	0.0	0.0	1.0	0.0	0.0	0.0	0.0	0.0	0.0	0.0	0.0	0.0
TNS4	217169	symbol	M. musculus	217169	M. musculus	Tns4	tensin 4	GO:0008104 protein localization;GO:0070727 cellular macromolecule localization;GO:0033036 macromolecule localization		0.0	0.0	0.0	0.0	0.0	0.0	0.0	0.0	0.0	0.0	0.0	0.0	0.0	0.0	0.0	0.0	0.0	0.0	0.0	0.0
TOB2	57259	symbol	M. musculus	57259	M. musculus	Tob2	transducer of ERBB2, 2	GO:0045671 negative regulation of osteoclast differentiation;GO:0030316 osteoclast differentiation;GO:0002762 negative regulation of myeloid leukocyte differentiation		0.0	0.0	0.0	0.0	0.0	0.0	0.0	0.0	0.0	0.0	0.0	0.0	0.0	0.0	0.0	1.0	0.0	0.0	0.0	0.0
TOR1A	30931	symbol	M. musculus	30931	M. musculus	Tor1a	torsin family 1, member A (torsin A)	GO:0051584 regulation of dopamine uptake involved in synaptic transmission;GO:0051940 regulation of catecholamine uptake involved in synaptic transmission;GO:0000338 protein deneddylation		0.0	0.0	0.0	0.0	0.0	0.0	0.0	0.0	0.0	0.0	0.0	0.0	0.0	0.0	0.0	0.0	0.0	0.0	0.0	0.0
TP53I13	216964	gene_synonym	M. musculus	216964	M. musculus	Trp53i13	transformation related protein 53 inducible protein 13	GO:0045786 negative regulation of cell cycle;GO:0051726 regulation of cell cycle;GO:0048523 negative regulation of cellular process		0.0	0.0	0.0	0.0	0.0	0.0	0.0	0.0	0.0	0.0	0.0	0.0	0.0	0.0	0.0	0.0	0.0	0.0	0.0	0.0
TPCN2	233979	symbol	M. musculus	233979	M. musculus	Tpcn2	two pore segment channel 2	GO:0048086 negative regulation of developmental pigmentation;GO:0090117 endosome to lysosome transport of low-density lipoprotein particle;GO:0019065 receptor-mediated endocytosis of virus by host cell		0.0	0.0	1.0	0.0	0.0	0.0	1.0	0.0	0.0	0.0	0.0	0.0	0.0	1.0	0.0	0.0	1.0	0.0	0.0	0.0
TPD52	21985	symbol	M. musculus	21985	M. musculus	Tpd52	tumor protein D52	GO:0030183 B cell differentiation;GO:0042113 B cell activation;GO:0030098 lymphocyte differentiation		0.0	0.0	0.0	0.0	0.0	0.0	0.0	0.0	0.0	0.0	0.0	0.0	0.0	0.0	0.0	1.0	0.0	0.0	0.0	0.0
TPI1	21991	symbol	M. musculus	21991	M. musculus	Tpi1	triosephosphate isomerase 1	GO:0019563 glycerol catabolic process;GO:0019405 alditol catabolic process;GO:0046174 polyol catabolic process		0.0	0.0	0.0	0.0	0.0	0.0	0.0	0.0	0.0	0.0	0.0	0.0	0.0	0.0	0.0	0.0	0.0	0.0	1.0	0.0
TRABD	67976	symbol	M. musculus	67976	M. musculus	Trabd	TraB domain containing	GO:0008150 biological_process		0.0	0.0	0.0	0.0	0.0	0.0	0.0	0.0	0.0	0.0	0.0	0.0	0.0	0.0	0.0	0.0	0.0	0.0	0.0	0.0
TRADD	71609	symbol	M. musculus	71609	M. musculus	Tradd	TNFRSF1A-associated via death domain	GO:0051798 positive regulation of hair follicle development;GO:1900119 positive regulation of execution phase of apoptosis;GO:0051797 regulation of hair follicle development		0.0	0.0	0.0	0.0	0.0	0.0	0.0	1.0	1.0	0.0	1.0	1.0	0.0	0.0	0.0	0.0	1.0	0.0	0.0	0.0
TRAFD1	231712	symbol	M. musculus	231712	M. musculus	Trafd1	TRAF type zinc finger domain containing 1	GO:0045824 negative regulation of innate immune response;GO:0002832 negative regulation of response to biotic stimulus;GO:0050777 negative regulation of immune response		0.0	0.0	0.0	0.0	0.0	0.0	0.0	0.0	0.0	0.0	1.0	0.0	0.0	0.0	0.0	0.0	0.0	0.0	0.0	0.0
TREM1	58217	symbol	M. musculus	58217	M. musculus	Trem1	triggering receptor expressed on myeloid cells 1	GO:0070945 neutrophil-mediated killing of gram-negative bacterium;GO:0072672 neutrophil extravasation;GO:0070942 neutrophil mediated cytotoxicity		0.0	0.0	0.0	1.0	0.0	1.0	0.0	1.0	0.0	0.0	1.0	1.0	0.0	0.0	0.0	1.0	0.0	0.0	0.0	0.0
TRERF1	224829	symbol	M. musculus	224829	M. musculus	Trerf1	transcriptional regulating factor 1	GO:0071393 cellular response to progesterone stimulus;GO:0050847 progesterone receptor signaling pathway;GO:0032570 response to progesterone		0.0	0.0	0.0	0.0	0.0	0.0	0.0	0.0	0.0	0.0	1.0	0.0	0.0	0.0	0.0	0.0	0.0	0.0	0.0	0.0
TREX1	22040	symbol	M. musculus	22040	M. musculus	Trex1	three prime repair exonuclease 1	GO:0002383 immune response in brain or nervous system;GO:0097281 immune complex formation;GO:0035781 CD86 biosynthetic process		0.0	0.0	0.0	0.0	1.0	1.0	1.0	0.0	1.0	0.0	1.0	0.0	0.0	0.0	0.0	1.0	0.0	0.0	1.0	0.0
TRIAP1	69076	symbol	M. musculus	69076	M. musculus	Triap1	TP53 regulated inhibitor of apoptosis 1	GO:1902166 negative regulation of intrinsic apoptotic signaling pathway in response to DNA damage by p53 class mediator;GO:2001140 positive regulation of phospholipid transport;GO:2001138 regulation of phospholipid transport		0.0	0.0	0.0	0.0	0.0	0.0	0.0	0.0	0.0	0.0	0.0	0.0	0.0	1.0	1.0	0.0	0.0	1.0	0.0	0.0
TRIM25	217069	symbol	M. musculus	217069	M. musculus	Trim25	tripartite motif-containing 25	GO:0044790 suppression of viral release by host;GO:0019076 viral release from host cell;GO:0035891 exit from host cell		0.0	0.0	0.0	0.0	0.0	0.0	0.0	0.0	0.0	0.0	1.0	0.0	0.0	0.0	0.0	0.0	0.0	0.0	0.0	0.0
TRIP10	106628	symbol	M. musculus	106628	M. musculus	Trip10	thyroid hormone receptor interactor 10	GO:0061051 positive regulation of cell growth involved in cardiac muscle cell development;GO:0061050 regulation of cell growth involved in cardiac muscle cell development;GO:0010667 negative regulation of cardiac muscle cell apoptotic process		0.0	0.0	0.0	0.0	0.0	0.0	1.0	0.0	0.0	0.0	0.0	0.0	0.0	0.0	0.0	0.0	0.0	0.0	0.0	0.0
TRMT10B	69934	symbol	M. musculus	69934	M. musculus	Trmt10b	tRNA methyltransferase 10B	GO:0002939 tRNA N1-guanine methylation;GO:0045039 protein insertion into mitochondrial inner membrane;GO:0090151 establishment of protein localization to mitochondrial membrane		0.0	0.0	0.0	0.0	0.0	0.0	0.0	0.0	0.0	0.0	0.0	0.0	0.0	0.0	0.0	0.0	0.0	0.0	0.0	0.0
TRMT44	78890	symbol	M. musculus	78890	M. musculus	Trmt44	tRNA methyltransferase 44	GO:0030488 tRNA methylation;GO:0001510 RNA methylation;GO:0006400 tRNA modification		0.0	0.0	0.0	0.0	0.0	0.0	0.0	0.0	0.0	0.0	0.0	0.0	0.0	0.0	0.0	0.0	0.0	0.0	0.0	0.0
TRPM2	28240	symbol	M. musculus	28240	M. musculus	Trpm2	transient receptor potential cation channel, subfamily M, member 2	GO:1900409 positive regulation of cellular response to oxidative stress;GO:0071502 cellular response to temperature stimulus;GO:1902884 positive regulation of response to oxidative stress		0.0	1.0	1.0	1.0	0.0	0.0	1.0	0.0	0.0	0.0	0.0	0.0	0.0	0.0	0.0	1.0	0.0	0.0	0.0	0.0
TSC22D3	14605	symbol	M. musculus	14605	M. musculus	Tsc22d3	TSC22 domain family, member 3	GO:0070236 negative regulation of activation-induced cell death of T cells;GO:0070235 regulation of activation-induced cell death of T cells;GO:0070233 negative regulation of T cell apoptotic process		0.0	0.0	0.0	0.0	0.0	0.0	0.0	0.0	0.0	0.0	0.0	0.0	0.0	0.0	0.0	0.0	0.0	0.0	0.0	0.0
TSEN54	76265	symbol	M. musculus	76265	M. musculus	Tsen54	tRNA splicing endonuclease subunit 54	GO:0000379 tRNA-type intron splice site recognition and cleavage;GO:0006388 tRNA splicing, via endonucleolytic cleavage and ligation;GO:0000394 RNA splicing, via endonucleolytic cleavage and ligation		0.0	0.0	0.0	0.0	0.0	0.0	0.0	0.0	0.0	0.0	0.0	0.0	0.0	0.0	0.0	0.0	0.0	0.0	0.0	0.0
TSPO	12257	symbol	M. musculus	12257	M. musculus	Tspo	translocator protein	GO:2000853 negative regulation of corticosterone secretion;GO:0072656 maintenance of protein location in mitochondrion;GO:2000832 negative regulation of steroid hormone secretion		0.0	0.0	0.0	0.0	0.0	0.0	0.0	0.0	1.0	0.0	0.0	1.0	0.0	1.0	0.0	0.0	0.0	1.0	0.0	0.0
TTYH2	117160	symbol	M. musculus	117160	M. musculus	Ttyh2	tweety family member 2	GO:0015813 L-glutamate transmembrane transport;GO:0051938 L-glutamate import;GO:0015800 acidic amino acid transport		0.0	0.0	1.0	0.0	0.0	0.0	0.0	0.0	0.0	0.0	0.0	0.0	0.0	0.0	0.0	0.0	0.0	0.0	0.0	0.0
TUBA4A	22145	symbol	M. musculus	22145	M. musculus	Tuba4a	tubulin, alpha 4A	GO:0000278 mitotic cell cycle;GO:0000226 microtubule cytoskeleton organization;GO:0007017 microtubule-based process		0.0	0.0	0.0	0.0	0.0	0.0	0.0	0.0	0.0	1.0	0.0	0.0	0.0	0.0	0.0	0.0	0.0	0.0	0.0	0.0
TUBE1	71924	symbol	M. musculus	71924	M. musculus	Tube1	tubulin, epsilon 1	GO:0000278 mitotic cell cycle;GO:0000226 microtubule cytoskeleton organization;GO:0007017 microtubule-based process		0.0	0.0	0.0	0.0	0.0	0.0	0.0	0.0	0.0	0.0	0.0	0.0	0.0	0.0	0.0	0.0	0.0	0.0	0.0	0.0
TUBGCP4	51885	symbol	M. musculus	51885	M. musculus	Tubgcp4	tubulin, gamma complex component 4	GO:0007020 microtubule nucleation;GO:0046785 microtubule polymerization;GO:0031122 cytoplasmic microtubule organization		0.0	0.0	0.0	0.0	0.0	0.0	0.0	0.0	0.0	0.0	0.0	0.0	0.0	0.0	0.0	0.0	0.0	0.0	0.0	0.0
TUFT1	22156	symbol	M. musculus	22156	M. musculus	Tuft1	tuftelin 1	GO:0031214 biomineral tissue development;GO:0035556 intracellular signal transduction;GO:0009888 tissue development		0.0	0.0	0.0	0.0	0.0	0.0	0.0	0.0	0.0	0.0	0.0	0.0	0.0	0.0	0.0	0.0	0.0	0.0	0.0	0.0
TXN	22166	gene_synonym	M. musculus	22166	M. musculus	Txn1	thioredoxin 1	GO:0061692 cellular detoxification of hydrogen peroxide;GO:2000170 positive regulation of peptidyl-cysteine S-nitrosylation;GO:0061691 detoxification of hydrogen peroxide		0.0	0.0	0.0	0.0	0.0	0.0	0.0	0.0	0.0	1.0	0.0	0.0	0.0	0.0	0.0	0.0	0.0	0.0	0.0	0.0
TXN2	56551	symbol	M. musculus	56551	M. musculus	Txn2	thioredoxin 2	GO:0045454 cell redox homeostasis;GO:0019725 cellular homeostasis;GO:0042592 homeostatic process		0.0	0.0	0.0	0.0	0.0	0.0	0.0	0.0	0.0	1.0	0.0	0.0	0.0	0.0	0.0	0.0	0.0	0.0	0.0	0.0
TXNDC16	70561	symbol	M. musculus	70561	M. musculus	Txndc16	thioredoxin domain containing 16	GO:0008150 biological_process		0.0	0.0	0.0	0.0	0.0	0.0	0.0	0.0	0.0	0.0	0.0	0.0	0.0	0.0	0.0	0.0	0.0	0.0	0.0	0.0
TXNRD2	26462	symbol	M. musculus	26462	M. musculus	Txnrd2	thioredoxin reductase 2	GO:0000305 response to oxygen radical;GO:0045454 cell redox homeostasis;GO:0000302 response to reactive oxygen species		0.0	0.0	0.0	0.0	0.0	0.0	0.0	0.0	0.0	1.0	0.0	0.0	0.0	0.0	0.0	0.0	0.0	0.0	0.0	0.0
U2AF1L4	233073	symbol	M. musculus	233073	M. musculus	U2af1l4	U2 small nuclear RNA auxiliary factor 1-like 4	GO:0000375 RNA splicing, via transesterification reactions;GO:0000377 RNA splicing, via transesterification reactions with bulged adenosine as nucleophile;GO:0000398 mRNA splicing, via spliceosome		1.0	0.0	0.0	0.0	0.0	0.0	0.0	0.0	0.0	0.0	0.0	0.0	0.0	0.0	0.0	0.0	0.0	0.0	0.0	0.0
UBA52	22186	symbol	M. musculus	22186	M. musculus	Uba52	ubiquitin A-52 residue ribosomal protein fusion product 1	GO:0140236 translation at presynapse;GO:0140241 translation at synapse;GO:0140242 translation at postsynapse		1.0	0.0	1.0	0.0	0.0	0.0	0.0	0.0	0.0	1.0	0.0	0.0	0.0	0.0	0.0	0.0	0.0	0.0	0.0	0.0
UBB	22187	symbol	M. musculus	22187	M. musculus	Ubb	ubiquitin B	GO:1902527 positive regulation of protein monoubiquitination;GO:1902525 regulation of protein monoubiquitination;GO:0021886 hypothalamus gonadotrophin-releasing hormone neuron differentiation		1.0	0.0	1.0	0.0	0.0	0.0	0.0	0.0	0.0	1.0	0.0	1.0	0.0	0.0	1.0	0.0	0.0	0.0	0.0	0.0
UBQLN4	94232	symbol	M. musculus	94232	M. musculus	Ubqln4	ubiquilin 4	GO:1901097 negative regulation of autophagosome maturation;GO:1901096 regulation of autophagosome maturation;GO:2000042 negative regulation of double-strand break repair via homologous recombination		0.0	0.0	0.0	0.0	0.0	0.0	0.0	0.0	0.0	0.0	0.0	0.0	0.0	0.0	1.0	0.0	0.0	1.0	0.0	0.0
UCP2	22228	symbol	M. musculus	22228	M. musculus	Ucp2	uncoupling protein 2 (mitochondrial, proton carrier)	GO:0061179 negative regulation of insulin secretion involved in cellular response to glucose stimulus;GO:0000266 mitochondrial fission;GO:0000303 response to superoxide		0.0	0.0	0.0	0.0	0.0	0.0	0.0	0.0	0.0	0.0	0.0	0.0	0.0	1.0	0.0	1.0	0.0	0.0	1.0	0.0
UGCG	22234	symbol	M. musculus	22234	M. musculus	Ugcg	UDP-glucose ceramide glucosyltransferase	GO:0006679 glucosylceramide biosynthetic process;GO:0006678 glucosylceramide metabolic process;GO:0046476 glycosylceramide biosynthetic process		0.0	0.0	0.0	0.0	0.0	0.0	0.0	0.0	0.0	0.0	0.0	0.0	0.0	0.0	0.0	0.0	0.0	0.0	0.0	0.0
UGT1A6	94284	gene_synonym	M. musculus	94284	M. musculus	Ugt1a6a	UDP glucuronosyltransferase 1 family, polypeptide A6A	GO:0018880 4-chlorobiphenyl metabolic process;GO:0042196 chlorinated hydrocarbon metabolic process;GO:0042197 halogenated hydrocarbon metabolic process		0.0	0.0	0.0	0.0	0.0	0.0	0.0	0.0	0.0	0.0	0.0	0.0	0.0	0.0	0.0	0.0	0.0	0.0	1.0	0.0
UMPS	22247	symbol	M. musculus	22247	M. musculus	Umps	uridine monophosphate synthetase	GO:0044205 'de novo' UMP biosynthetic process;GO:0006225 UDP biosynthetic process;GO:0009194 pyrimidine ribonucleoside diphosphate biosynthetic process		0.0	0.0	0.0	0.0	0.0	0.0	0.0	0.0	0.0	0.0	0.0	0.0	0.0	0.0	0.0	0.0	0.0	0.0	1.0	0.0
UNC119	22248	symbol	M. musculus	22248	M. musculus	Unc119	unc-119 lipid binding chaperone	GO:2001287 negative regulation of caveolin-mediated endocytosis;GO:1900186 negative regulation of clathrin-dependent endocytosis;GO:2001286 regulation of caveolin-mediated endocytosis		0.0	0.0	0.0	0.0	0.0	0.0	1.0	0.0	0.0	0.0	0.0	0.0	0.0	0.0	0.0	0.0	0.0	1.0	0.0	0.0
UNC5B	107449	symbol	M. musculus	107449	M. musculus	Unc5b	unc-5 netrin receptor B	GO:0033564 anterior/posterior axon guidance;GO:0038007 netrin-activated signaling pathway;GO:2001241 positive regulation of extrinsic apoptotic signaling pathway in absence of ligand		0.0	0.0	0.0	0.0	0.0	0.0	0.0	0.0	0.0	0.0	0.0	1.0	0.0	0.0	0.0	0.0	0.0	0.0	0.0	0.0
UQCR10	66152	symbol	M. musculus	66152	M. musculus	Uqcr10	ubiquinol-cytochrome c reductase, complex III subunit X	GO:0006122 mitochondrial electron transport, ubiquinol to cytochrome c;GO:0019646 aerobic electron transport chain;GO:0042775 mitochondrial ATP synthesis coupled electron transport		0.0	0.0	0.0	0.0	0.0	0.0	0.0	0.0	0.0	0.0	0.0	0.0	0.0	0.0	0.0	0.0	0.0	0.0	1.0	0.0
URB1	207932	symbol	M. musculus	207932	M. musculus	Urb1	URB1 ribosome biogenesis 1 homolog (S. cerevisiae)	GO:0000463 maturation of LSU-rRNA from tricistronic rRNA transcript (SSU-rRNA, 5.8S rRNA, LSU-rRNA);GO:0000466 maturation of 5.8S rRNA from tricistronic rRNA transcript (SSU-rRNA, 5.8S rRNA, LSU-rRNA);GO:0000470 maturation of LSU-rRNA		1.0	0.0	0.0	0.0	0.0	0.0	0.0	0.0	0.0	0.0	0.0	0.0	0.0	0.0	0.0	0.0	0.0	0.0	0.0	0.0
USE1	67023	symbol	M. musculus	67023	M. musculus	Use1	unconventional SNARE in the ER 1 homolog (S. cerevisiae)	GO:0060628 regulation of ER to Golgi vesicle-mediated transport;GO:0071786 endoplasmic reticulum tubular network organization;GO:0006890 retrograde vesicle-mediated transport, Golgi to endoplasmic reticulum		0.0	0.0	0.0	0.0	0.0	0.0	0.0	0.0	0.0	0.0	0.0	0.0	0.0	0.0	0.0	0.0	0.0	0.0	0.0	0.0
USP36	72344	symbol	M. musculus	72344	M. musculus	Usp36	ubiquitin specific peptidase 36	GO:0007000 nucleolus organization;GO:2000232 regulation of rRNA processing;GO:0016242 negative regulation of macroautophagy		0.0	0.0	0.0	0.0	0.0	0.0	0.0	0.0	0.0	0.0	0.0	0.0	0.0	0.0	0.0	0.0	0.0	0.0	0.0	0.0
UTP14A	72554	symbol	M. musculus	72554	M. musculus	Utp14a	UTP14A small subunit processome component	GO:0006364 rRNA processing;GO:0016072 rRNA metabolic process;GO:0042254 ribosome biogenesis		1.0	0.0	0.0	0.0	0.0	0.0	0.0	0.0	0.0	0.0	0.0	0.0	0.0	0.0	0.0	0.0	0.0	0.0	0.0	0.0
UTP23	78581	symbol	M. musculus	78581	M. musculus	Utp23	UTP23 small subunit processome component	GO:0000480 endonucleolytic cleavage in 5'-ETS of tricistronic rRNA transcript (SSU-rRNA, 5.8S rRNA, LSU-rRNA);GO:0000479 endonucleolytic cleavage of tricistronic rRNA transcript (SSU-rRNA, 5.8S rRNA, LSU-rRNA);GO:0000462 maturation of SSU-rRNA from tricistronic rRNA transcript (SSU-rRNA, 5.8S rRNA, LSU-rRNA)		1.0	0.0	0.0	0.0	0.0	0.0	0.0	0.0	0.0	0.0	0.0	0.0	0.0	0.0	0.0	0.0	0.0	0.0	0.0	0.0
VARS2	68915	symbol	M. musculus	68915	M. musculus	Vars2	valyl-tRNA synthetase 2, mitochondrial	GO:0006438 valyl-tRNA aminoacylation;GO:0006418 tRNA aminoacylation for protein translation;GO:0043039 tRNA aminoacylation		1.0	0.0	0.0	0.0	0.0	0.0	0.0	0.0	0.0	0.0	0.0	0.0	0.0	0.0	0.0	0.0	0.0	0.0	0.0	0.0
VASN	246154	symbol	M. musculus	246154	M. musculus	Vasn	vasorin	GO:0071461 cellular response to redox state;GO:0051775 response to redox state;GO:0010719 negative regulation of epithelial to mesenchymal transition		0.0	0.0	0.0	0.0	0.0	0.0	0.0	0.0	0.0	0.0	0.0	0.0	0.0	0.0	0.0	0.0	0.0	0.0	0.0	0.0
VCL	22330	symbol	M. musculus	22330	M. musculus	Vcl	vinculin	GO:1904702 regulation of protein localization to adherens junction;GO:0150106 regulation of protein localization to cell-cell junction;GO:0034333 adherens junction assembly		0.0	1.0	0.0	0.0	0.0	0.0	0.0	0.0	0.0	0.0	0.0	0.0	0.0	0.0	0.0	0.0	0.0	0.0	0.0	0.0
VIPR1	22354	symbol	M. musculus	22354	M. musculus	Vipr1	vasoactive intestinal peptide receptor 1	GO:0007187 G protein-coupled receptor signaling pathway, coupled to cyclic nucleotide second messenger;GO:0007188 adenylate cyclase-modulating G protein-coupled receptor signaling pathway;GO:0007186 G protein-coupled receptor signaling pathway		0.0	0.0	0.0	0.0	0.0	0.0	0.0	0.0	0.0	0.0	0.0	0.0	0.0	0.0	0.0	0.0	0.0	0.0	0.0	0.0
VMAC	106639	symbol	M. musculus	106639	M. musculus	Vmac	vimentin-type intermediate filament associated coiled-coil protein	GO:0008150 biological_process		0.0	0.0	0.0	0.0	0.0	0.0	0.0	0.0	0.0	0.0	0.0	0.0	0.0	0.0	0.0	0.0	0.0	0.0	0.0	0.0
VMP1	75909	symbol	M. musculus	75909	M. musculus	Vmp1	vacuole membrane protein 1	GO:1901896 positive regulation of ATPase-coupled calcium transmembrane transporter activity;GO:0016240 autophagosome membrane docking;GO:1990456 mitochondrion-endoplasmic reticulum membrane tethering		0.0	0.0	0.0	0.0	0.0	0.0	0.0	0.0	0.0	0.0	0.0	0.0	0.0	1.0	0.0	0.0	0.0	0.0	0.0	0.0
VPS13C	320528	symbol	M. musculus	320528	M. musculus	Vps13c	vacuolar protein sorting 13C	GO:1905090 negative regulation of parkin-mediated stimulation of mitophagy in response to mitochondrial depolarization;GO:1905089 regulation of parkin-mediated stimulation of mitophagy in response to mitochondrial depolarization;GO:0045053 protein retention in Golgi apparatus		0.0	0.0	0.0	0.0	0.0	0.0	0.0	0.0	0.0	0.0	0.0	0.0	0.0	1.0	0.0	0.0	0.0	0.0	0.0	0.0
VPS26C	13185	symbol	M. musculus	13185	M. musculus	Vps26c	VPS26 endosomal protein sorting factor C	GO:0032456 endocytic recycling;GO:0098876 vesicle-mediated transport to the plasma membrane;GO:0016197 endosomal transport		0.0	0.0	0.0	0.0	0.0	0.0	0.0	0.0	0.0	0.0	0.0	0.0	0.0	0.0	0.0	0.0	0.0	0.0	0.0	0.0
WDHD1	218973	symbol	M. musculus	218973	M. musculus	Wdhd1	WD repeat and HMG-box DNA binding protein 1	GO:0140462 pericentric heterochromatin organization;GO:0006261 DNA-templated DNA replication;GO:0031507 heterochromatin formation		0.0	0.0	0.0	0.0	0.0	0.0	0.0	0.0	0.0	0.0	0.0	0.0	0.0	0.0	0.0	0.0	0.0	0.0	0.0	0.0
WDR18	216156	symbol	M. musculus	216156	M. musculus	Wdr18	WD repeat domain 18	GO:0006261 DNA-templated DNA replication;GO:0006260 DNA replication;GO:0006364 rRNA processing		1.0	0.0	0.0	0.0	0.0	0.0	0.0	0.0	0.0	0.0	0.0	0.0	0.0	0.0	0.0	0.0	0.0	0.0	0.0	0.0
WDR3	269470	symbol	M. musculus	269470	M. musculus	Wdr3	WD repeat domain 3	GO:0030490 maturation of SSU-rRNA;GO:0042274 ribosomal small subunit biogenesis;GO:0006364 rRNA processing		1.0	0.0	0.0	0.0	0.0	0.0	0.0	0.0	0.0	0.0	0.0	0.0	0.0	0.0	0.0	0.0	0.0	0.0	0.0	0.0
WDR36	225348	symbol	M. musculus	225348	M. musculus	Wdr36	WD repeat domain 36	GO:0001895 retina homeostasis;GO:0030516 regulation of axon extension;GO:0042274 ribosomal small subunit biogenesis		1.0	0.0	0.0	0.0	0.0	0.0	0.0	0.0	0.0	0.0	0.0	0.0	0.0	0.0	0.0	0.0	0.0	0.0	0.0	0.0
WDR6	83669	symbol	M. musculus	83669	M. musculus	Wdr6	WD repeat domain 6	GO:0002130 wobble position ribose methylation;GO:0002128 tRNA nucleoside ribose methylation;GO:0070314 G1 to G0 transition		0.0	0.0	0.0	0.0	0.0	0.0	0.0	0.0	0.0	0.0	0.0	0.0	0.0	0.0	0.0	0.0	0.0	0.0	0.0	0.0
WDR74	107071	symbol	M. musculus	107071	M. musculus	Wdr74	WD repeat domain 74	GO:0001825 blastocyst formation;GO:0042273 ribosomal large subunit biogenesis;GO:0001824 blastocyst development		1.0	0.0	0.0	0.0	0.0	0.0	0.0	0.0	0.0	0.0	0.0	0.0	0.0	0.0	0.0	0.0	0.0	0.0	0.0	0.0
WDTC1	230796	symbol	M. musculus	230796	M. musculus	Wdtc1	WD and tetratricopeptide repeats 1	GO:0045717 negative regulation of fatty acid biosynthetic process;GO:0045922 negative regulation of fatty acid metabolic process;GO:0042304 regulation of fatty acid biosynthetic process		0.0	0.0	0.0	0.0	0.0	0.0	0.0	0.0	0.0	0.0	0.0	0.0	0.0	0.0	0.0	0.0	0.0	0.0	1.0	0.0
WFS1	22393	symbol	M. musculus	22393	M. musculus	Wfs1	wolframin ER transmembrane glycoprotein	GO:1903892 negative regulation of ATF6-mediated unfolded protein response;GO:1903891 regulation of ATF6-mediated unfolded protein response;GO:2000675 negative regulation of type B pancreatic cell apoptotic process		0.0	0.0	0.0	0.0	0.0	0.0	0.0	0.0	0.0	0.0	0.0	0.0	0.0	0.0	1.0	0.0	0.0	0.0	0.0	0.0
XBP1	22433	symbol	M. musculus	22433	M. musculus	Xbp1	X-box binding protein 1	GO:0060096 serotonin secretion, neurotransmission;GO:0060691 epithelial cell maturation involved in salivary gland development;GO:1990418 response to insulin-like growth factor stimulus		0.0	0.0	0.0	0.0	0.0	0.0	0.0	1.0	1.0	0.0	1.0	1.0	0.0	0.0	0.0	0.0	1.0	0.0	0.0	0.0
XDH	22436	symbol	M. musculus	22436	M. musculus	Xdh	xanthine dehydrogenase	GO:0010044 response to aluminum ion;GO:2001213 negative regulation of vasculogenesis;GO:0009114 hypoxanthine catabolic process		0.0	0.0	0.0	0.0	0.0	0.0	0.0	0.0	0.0	0.0	0.0	0.0	0.0	0.0	1.0	0.0	0.0	0.0	1.0	1.0
XYLT1	233781	symbol	M. musculus	233781	M. musculus	Xylt1	xylosyltransferase 1	GO:0030206 chondroitin sulfate biosynthetic process;GO:0048681 negative regulation of axon regeneration;GO:0070571 negative regulation of neuron projection regeneration		0.0	0.0	0.0	0.0	0.0	0.0	0.0	0.0	0.0	0.0	0.0	0.0	0.0	0.0	0.0	0.0	0.0	1.0	0.0	0.0
XYLT2	217119	symbol	M. musculus	217119	M. musculus	Xylt2	xylosyltransferase II	GO:0030210 heparin biosynthetic process;GO:0030202 heparin metabolic process;GO:0050650 chondroitin sulfate proteoglycan biosynthetic process		0.0	0.0	0.0	0.0	0.0	0.0	0.0	0.0	0.0	0.0	0.0	0.0	0.0	0.0	0.0	0.0	0.0	0.0	0.0	0.0
ZBTB25	109929	symbol	M. musculus	109929	M. musculus	Zbtb25	zinc finger and BTB domain containing 25	GO:0001817 regulation of cytokine production;GO:0000122 negative regulation of transcription by RNA polymerase II;GO:0045892 negative regulation of DNA-templated transcription		0.0	0.0	0.0	0.0	0.0	0.0	0.0	0.0	0.0	0.0	0.0	0.0	0.0	0.0	0.0	0.0	0.0	0.0	0.0	0.0
ZBTB42	382639	symbol	M. musculus	382639	M. musculus	Zbtb42	zinc finger and BTB domain containing 42	GO:0007517 muscle organ development;GO:0061061 muscle structure development;GO:0000122 negative regulation of transcription by RNA polymerase II		0.0	0.0	0.0	0.0	0.0	0.0	0.0	0.0	0.0	0.0	0.0	0.0	0.0	0.0	0.0	0.0	0.0	0.0	0.0	0.0
ZBTB5	230119	symbol	M. musculus	230119	M. musculus	Zbtb5	zinc finger and BTB domain containing 5	GO:0000122 negative regulation of transcription by RNA polymerase II;GO:0045892 negative regulation of DNA-templated transcription;GO:1902679 negative regulation of RNA biosynthetic process		0.0	0.0	0.0	0.0	0.0	0.0	0.0	0.0	0.0	0.0	0.0	0.0	0.0	0.0	0.0	0.0	0.0	0.0	0.0	0.0
ZBTB7B	22724	symbol	M. musculus	22724	M. musculus	Zbtb7b	zinc finger and BTB domain containing 7B	GO:0051141 negative regulation of NK T cell proliferation;GO:0051134 negative regulation of NK T cell activation;GO:2000640 positive regulation of SREBP signaling pathway		0.0	0.0	0.0	0.0	0.0	0.0	0.0	0.0	1.0	0.0	0.0	0.0	0.0	0.0	0.0	1.0	0.0	0.0	0.0	0.0
ZC3H12D	237256	symbol	M. musculus	237256	M. musculus	Zc3h12d	zinc finger CCCH type containing 12D	GO:0061158 3'-UTR-mediated mRNA destabilization;GO:2000134 negative regulation of G1/S transition of mitotic cell cycle;GO:1902807 negative regulation of cell cycle G1/S phase transition		0.0	0.0	0.0	0.0	0.0	0.0	0.0	0.0	0.0	0.0	0.0	0.0	0.0	0.0	0.0	1.0	0.0	0.0	0.0	0.0
ZCCHC17	619605	symbol	M. musculus	619605	M. musculus	Zcchc17	zinc finger, CCHC domain containing 17	GO:0043489 RNA stabilization;GO:1902369 negative regulation of RNA catabolic process;GO:0043487 regulation of RNA stability		0.0	0.0	0.0	0.0	0.0	0.0	0.0	0.0	0.0	0.0	0.0	0.0	0.0	0.0	0.0	0.0	0.0	0.0	0.0	0.0
ZDHHC23	332175	symbol	M. musculus	332175	M. musculus	Zdhhc23	zinc finger, DHHC domain containing 23	GO:0018230 peptidyl-L-cysteine S-palmitoylation;GO:0018231 peptidyl-S-diacylglycerol-L-cysteine biosynthetic process from peptidyl-cysteine;GO:0018345 protein palmitoylation		0.0	0.0	0.0	0.0	0.0	0.0	0.0	0.0	0.0	0.0	0.0	0.0	0.0	0.0	0.0	0.0	0.0	0.0	0.0	0.0
ZFAND2B	68818	symbol	M. musculus	68818	M. musculus	Zfand2b	zinc finger, AN1 type domain 2B	GO:0006616 SRP-dependent cotranslational protein targeting to membrane, translocation;GO:0006614 SRP-dependent cotranslational protein targeting to membrane;GO:0006613 cotranslational protein targeting to membrane		0.0	0.0	0.0	0.0	0.0	0.0	0.0	0.0	0.0	0.0	0.0	0.0	0.0	0.0	0.0	0.0	0.0	0.0	0.0	0.0
ZMYND15	574428	symbol	M. musculus	574428	M. musculus	Zmynd15	zinc finger, MYND-type containing 15	GO:0007286 spermatid development;GO:0048515 spermatid differentiation;GO:0007281 germ cell development		0.0	0.0	0.0	0.0	0.0	0.0	0.0	0.0	0.0	0.0	0.0	0.0	0.0	0.0	0.0	0.0	0.0	0.0	0.0	0.0
ZNF142	77264	gene_synonym	M. musculus	77264	M. musculus	Zfp142	zinc finger protein 142	GO:0045944 positive regulation of transcription by RNA polymerase II;GO:0045893 positive regulation of DNA-templated transcription;GO:1902680 positive regulation of RNA biosynthetic process		0.0	0.0	0.0	0.0	0.0	0.0	0.0	0.0	0.0	0.0	0.0	0.0	0.0	0.0	0.0	0.0	0.0	0.0	0.0	0.0
ZNF202	80902	gene_synonym	M. musculus	80902	M. musculus	Zfp202	zinc finger protein 202	GO:0000122 negative regulation of transcription by RNA polymerase II;GO:0045892 negative regulation of DNA-templated transcription;GO:1902679 negative regulation of RNA biosynthetic process		0.0	0.0	0.0	0.0	0.0	0.0	0.0	0.0	0.0	0.0	0.0	0.0	0.0	0.0	0.0	0.0	0.0	0.0	0.0	0.0
ZNF282						None	None	None	None	nan	nan	nan	nan	nan	nan	nan	nan	nan	nan	nan	nan	nan	nan	nan	nan	nan	nan	nan	nan
ZNF367	238673	gene_synonym	M. musculus	238673	M. musculus	Zfp367	zinc finger protein 367	GO:0006357 regulation of transcription by RNA polymerase II;GO:0006355 regulation of DNA-templated transcription;GO:2001141 regulation of RNA biosynthetic process		0.0	0.0	0.0	0.0	0.0	0.0	0.0	0.0	0.0	0.0	0.0	0.0	0.0	0.0	0.0	0.0	0.0	0.0	0.0	0.0
ZNF395						None	None	None	None	nan	nan	nan	nan	nan	nan	nan	nan	nan	nan	nan	nan	nan	nan	nan	nan	nan	nan	nan	nan
ZNF704	170753	gene_synonym	M. musculus	170753	M. musculus	Zfp704	zinc finger protein 704	GO:0006357 regulation of transcription by RNA polymerase II;GO:0006355 regulation of DNA-templated transcription;GO:2001141 regulation of RNA biosynthetic process		0.0	0.0	0.0	0.0	0.0	0.0	0.0	0.0	0.0	0.0	0.0	0.0	0.0	0.0	0.0	0.0	0.0	0.0	0.0	0.0
ZNF791						None	None	None	None	nan	nan	nan	nan	nan	nan	nan	nan	nan	nan	nan	nan	nan	nan	nan	nan	nan	nan	nan	nan
ZNHIT3	448850	symbol	M. musculus	448850	M. musculus	Znhit3	zinc finger, HIT type 3	GO:0048254 snoRNA localization;GO:0000492 box C/D snoRNP assembly;GO:0000491 small nucleolar ribonucleoprotein complex assembly		1.0	0.0	0.0	0.0	0.0	0.0	0.0	0.0	0.0	0.0	0.0	0.0	0.0	0.0	0.0	0.0	0.0	0.0	0.0	0.0
ZWILCH	68014	symbol	M. musculus	68014	M. musculus	Zwilch	zwilch kinetochore protein	GO:0034501 protein localization to kinetochore;GO:1903083 protein localization to condensed chromosome;GO:0071459 protein localization to chromosome, centromeric region		0.0	0.0	0.0	0.0	0.0	0.0	0.0	0.0	0.0	0.0	0.0	0.0	0.0	0.0	0.0	0.0	0.0	1.0	0.0	0.0

## Sheet: Fig4_MouseUniqueEnrichment
Table 2.3	Fig4_MouseUniqueEnrichment
GroupID	Category	Term	Description	LogP	Log(q-value)	Genes	Symbols	InTerm_InList
1_Summary	Reactome Gene Sets	R-MMU-72689	Formation of a pool of free 40S subunits	-13.9259	-9.66632	19899,19951,19982,20044,20054,20068,20085,20091,20102,20103,22121,22186,26961,27207,27370,56040,65019,66085,66481,67097,67115,67186,67427,67891,68135,73830,76846,13685,19896,60365,13629,27998,72554,216156,225348,269470,55949,66656,11810,15511,16913,17164,19172,20638,22187,23983,26443,54196,54563,56417,66101,66125,67089,68106,68188,69583,72654,72935,116748,215051,233073,12259,12266,12267,12273,130…	Rpl18,Rpl32,Rpl36a,Rps14,Rps15,Rps17,Rps19,Rps3a1,Rps4x,Rps5,Rpl13a,Uba52,Rpl8,Rps11,Rps26,Rplp1,Rpl23,Eif3f,Rps21,Rps10,Rpl14,Rplp2,Rps20,Rpl4,Eif3h,Eif3k,Rps9,Eif4ebp1,Rpl10a,Rbm8a,Eef2,Exosc5,Utp14a,Wdr18,Wdr36,Wdr3,Eef1b2,Eef1d,Apobec1,Hspa1b,Psmb8,Mapkapk2,Psmb4,Snrpb,Ubb,Pcbp1,Psma6,Pabpn1,Nup210,Adar,Ppih,Sf3b5,Psmc6,Nt5c3b,Sympk,Tnfsf13,Ccdc12,Ddx41,Lsm10,Bud13,U2af1l4,C1qa,C3,C3ar1,C5ar1…	85/-
2_Summary	Reactome Gene Sets	R-MMU-6798695	Neutrophil degranulation	-13.2022	-9.27323	11689,11758,11772,11783,11821,12266,12267,12273,12333,12512,13014,13030,13032,13036,13057,13058,13367,13629,13830,14130,14667,14751,15511,16408,17159,18173,18600,18636,18641,18793,19025,19156,20195,20202,22330,23845,24088,26364,27261,28240,56212,56620,63986,64138,67512,68724,69537,69660,72042,73690,74244,75744,76025,78388,83409,83768,102595,110006,223646,224794,227753,241633,381308	Alox5,Prdx6,Ap2a2,Apaf1,Aprt,C3,C3ar1,C5ar1,Capn1,Cd63,Cstb,Ctsb,Ctsc,Ctsh,Cyba,Cybb,Diaph1,Eef2,Stom,Fcgr2b,Gm2a,Gpi1,Hspa1b,Itgal,Man2b1,Slc11a1,Padi2,Cfp,Pfkl,Plaur,Ctsa,Psap,S100a11,S100a9,Vcl,Clec5a,Tlr2,Adgre5,Dok3,Trpm2,Rhog,Clec4n,Gmfg,Ctsz,Agpat2,Arl8a,Dnase1l1,Tmbim1,Cotl1,Glipr1,Atg7,Svip,Cant1,Mvp,Lamtor2,Dpp7,Plekho2,Gusb,Naprt,Enpp4,Gsn,Atp8b4,Ifi211	63/-
3_Summary	Reactome Gene Sets	R-MMU-382551	Transport of small molecules	-9.38781	-6.35868	11307,11425,11772,11812,11813,11928,11932,11937,12752,12870,13358,13723,13830,14693,15216,15368,16913,17254,18173,18453,18830,19172,20499,20511,20533,20535,20652,20928,22186,22187,22782,23943,24115,26443,26874,27376,28240,56356,66144,67089,68428,70484,72017,74772,75750,100017,100434,100604,105847,107566,110895,114644,117160,170759,226144,227659,228368,231287,233979,241633,268512,331004,338365,381…	Abcg1,Apoc4,Ap2a2,Apoc1,Apoc2,Atp1a1,Atp1b2,Atp2a1,Cln3,Cp,Slc25a1,Emb,Stom,Gnb2,Hfe,Hmox1,Psmb8,Slc3a2,Slc11a1,P4hb,Pltp,Psmb4,Slc12a7,Slc1a2,Slc4a1,Slc4a2,Soat1,Abcc9,Uba52,Ubb,Slc30a1,Esyt1,Best1,Psma6,Abcd2,Slc25a10,Trpm2,Gltp,Atp6v1f,Psmc6,Steap3,Slc35d2,Cyb5r1,Atp13a2,Slc10a6,Ldlrap1,Slc44a1,Lrrc8c,Lmf2,Arl2bp,Slc9a4,Slc13a3,Ttyh2,Atp13a1,Erlin1,Slc2a6,Slc35c1,Atp10d,Tpcn2,Atp8b4,Slc26a11,S…	65/-
4_Summary	GO Biological Processes	GO:0050900	leukocyte migration	-9.22033	-6.29466	11689,12273,12490,12642,12768,12802,14042,14345,14456,16176,16403,16408,16534,16803,17925,18003,18081,18578,18605,18810,20085,20202,20306,20737,20750,22121,24088,28240,56715,58217,64095,66102,98365,171486,246177,15234,54199,56212,269608,12267,13367,14747,18717,20359,66049,68119,76524,193385	Alox5,C5ar1,Cd34,Ch25h,Ccr1,Cnr2,Ext1,Fut4,Gas6,Il1b,Itga6,Itgal,Kcnn4,Lbp,Myo9b,Nedd9,Ninj1,Pde4b,Enpp1,Plec,Rps19,S100a9,Ccl7,Spn,Spp1,Rpl13a,Tlr2,Trpm2,Rabgef1,Trem1,Gpr35,Cxcl16,Slamf9,Cd99l2,Myo1g,Hgf,Ccrl2,Rhog,Plekhg5,C3ar1,Diaph1,Cmklr1,Pip5k1c,Sema6b,Rogdi,Cmtm3,Cln6,Ripor2	48/-
5_Summary	GO Biological Processes	GO:0006954	inflammatory response	-9.17022	-6.27238	11689,11820,11988,12053,12259,12266,12267,12273,12768,12802,13057,13058,14042,14066,14104,14130,14284,14345,14747,15368,15531,16176,16177,16181,16190,16803,17035,17164,18081,18128,18173,18605,18782,19217,19219,19419,19664,20202,20306,21825,21897,22040,24058,24088,26362,27226,54199,56644,57783,57914,69038,79221,80859,170744,192187,227541,229534,268973,328417	Alox5,App,Slc7a2,Bcl6,C1qa,C3,C3ar1,C5ar1,Ccr1,Cnr2,Cyba,Cybb,Ext1,F3,Fasn,Fcgr2b,Fosl2,Fut4,Cmklr1,Hmox1,Ndst1,Il1b,Il1r1,Il1rn,Il4ra,Lbp,Lxn,Mapkapk2,Ninj1,Notch1,Slc11a1,Enpp1,Pla2g2d,Ptger2,Ptger4,Rasgrp1,Rbpj,S100a9,Ccl7,Thbs1,Tlr1,Trex1,Sigirr,Tlr2,Axl,Pla2g7,Ccrl2,Clec7a,Tnip1,Crlf2,Tmem258,Hdac9,Nfkbiz,Tlr8,Stab1,Camk1d,Pbxip1,Nlrc4,Parp4	59/-
6_Summary	GO Biological Processes	GO:0001816	cytokine production	-8.37592	-5.53132	12051,12053,12504,12522,14042,14130,14284,14456,15975,16176,16803,17164,18128,18173,18605,19217,19219,19419,19664,20737,20928,22040,23882,24088,26362,54123,56715,57914,58217,80859,98365,17686,50723,54125,69583	Bcl3,Bcl6,Cd4,Cd83,Ext1,Fcgr2b,Fosl2,Gas6,Ifnar1,Il1b,Lbp,Mapkapk2,Notch1,Slc11a1,Enpp1,Ptger2,Ptger4,Rasgrp1,Rbpj,Spn,Abcc9,Trex1,Gadd45g,Tlr2,Axl,Irf7,Rabgef1,Crlf2,Trem1,Nfkbiz,Slamf9,Msh3,Icosl,Polm,Tnfsf13	35/-
7_Summary	GO Biological Processes	GO:0098657	import into cell	-8.2371	-5.40889	11772,11820,11890,11928,11932,11988,12752,13132,13367,14130,14251,14456,16408,16443,16513,16524,17164,17254,17533,17913,17972,17999,18173,18717,18806,20499,20511,20514,20660,20928,21825,22040,22248,22350,23790,26362,28240,52009,52055,56644,56715,66102,66147,66725,67602,67739,74775,100017,100604,102626,106628,107817,110895,194590,215114,226421,227753,227801,231580,233979,240055,246177,331004,433926	Ap2a2,App,Asgr2,Atp1a1,Atp1b2,Slc7a2,Cln3,Dab2,Diaph1,Fcgr2b,Flot1,Gas6,Itgal,Itsn1,Kcnj10,Kcnj9,Mapkapk2,Slc3a2,Mrc1,Myo1c,Ncf4,Nedd4,Slc11a1,Pip5k1c,Pld2,Slc12a7,Slc1a2,Slc1a5,Sorl1,Abcc9,Thbs1,Trex1,Unc119,Ezr,Coro1c,Axl,Trpm2,Jpt2,Rab11fip5,Clec7a,Rabgef1,Cxcl16,Necap2,Lrrk2,Necap1,Slc48a1,Lmbr1l,Ldlrap1,Lrrc8c,Mapkapk3,Trip10,Jmjd6,Slc9a4,Reps2,Hip1,Rab7b,Gsn,Dennd1a,Gak,Tpcn2,Neurl1b,Myo1g,…	64/-
8_Summary	GO Biological Processes	GO:0002685	regulation of leukocyte migration	-8.03398	-5.22581	11820,12267,12273,12333,12768,14345,14456,14747,16149,16176,16177,16803,17387,17524,18003,18081,18438,18600,19219,19229,19252,20306,20737,21825,24088,27226,56715,57266,58217,100952,171486,193385,227541,11502,13036,13132,13367,14066,14173,14694,14726,14751,15185,15234,15368,16403,17869,17913,18128,18570,18806,20195,20359,22433,50918,56644,66102,71609,71653,79221,192176,208727,384783,12053,20440,12…	App,C3ar1,C5ar1,Capn1,Ccr1,Fut4,Gas6,Cmklr1,Cd74,Il1b,Il1r1,Lbp,Mmp14,Mpp1,Nedd9,Ninj1,P2rx4,Padi2,Ptger4,Ptk2b,Dusp1,Ccl7,Spn,Thbs1,Tlr2,Pla2g7,Rabgef1,Cxcl14,Trem1,Emilin1,Cd99l2,Ripor2,Camk1d,Adam9,Ctsh,Dab2,Diaph1,F3,Fgf2,Rack1,Pdpn,Gpi1,Hdac6,Hgf,Hmox1,Itga6,Myc,Myo1c,Notch1,Pdcd6,Pld2,S100a11,Sema6b,Xbp1,Myadm,Clec7a,Cxcl16,Tradd,Shtn1,Hdac9,Flna,Hdac4,Irs2,Bcl6,St6gal1,C3	66/-
9_Summary	GO Biological Processes	GO:0001819	positive regulation of cytokine production	-8.02298	-5.22581	11820,12051,12266,12267,12273,12490,12522,12523,13057,13058,14066,14130,14251,15234,15975,16149,16176,16177,16190,16362,16803,17164,18106,18173,18413,18578,19219,19419,20660,20737,20742,21825,21897,22433,22724,23845,24088,50723,54123,56620,56644,57914,66725,67512,71609,73914,76438,80861,170744,214855,217203,226421,268973,12257,14456,16534,22040,26362,56715,11783,12265,12795,16155,17533,75600,1707…	App,Bcl3,C3,C3ar1,C5ar1,Cd34,Cd83,Cd84,Cyba,Cybb,F3,Fcgr2b,Flot1,Hgf,Ifnar1,Cd74,Il1b,Il1r1,Il4ra,Irf1,Lbp,Mapkapk2,Cd244a,Slc11a1,Osm,Pde4b,Ptger4,Rasgrp1,Sorl1,Spn,Sptbn1,Thbs1,Tlr1,Xbp1,Zbtb7b,Clec5a,Tlr2,Icosl,Irf7,Clec4n,Clec7a,Crlf2,Lrrk2,Agpat2,Tradd,Irak3,Rftn1,Dhx58,Tlr8,Arid5a,Tmem106a,Rab7b,Nlrc4,Tspo,Gas6,Kcnn4,Trex1,Axl,Rabgef1,Apaf1,Ciita,Plk3,Il10rb,Mrc1,Calml4,Rfxap	66/-
10_Summary	Reactome Gene Sets	R-MMU-9711123	Cellular response to chemical stress	-7.9098	-5.14159	11758,12857,12858,12861,12864,12868,13057,13058,15368,16913,17972,17977,18412,18453,19172,20463,22166,22186,22187,26443,26462,54683,56551,59035,67089,14229,15185,15511,17164,17535,17684,18415,22145,23872,26408,29806,50932,54170,54563,59008,66144,68441,83409,102626,112406,665113	Prdx6,Cox4i1,Cox5a,Cox6a1,Cox6c,Cox8a,Cyba,Cybb,Hmox1,Psmb8,Ncf4,Ncoa1,Sqstm1,P4hb,Psmb4,Cox7a2l,Txn1,Uba52,Ubb,Psma6,Txnrd2,Prdx5,Txn2,Carm1,Psmc6,Fkbp5,Hdac6,Hspa1b,Mapkapk2,Mre11a,Cited2,Hspa4l,Tuba4a,Ets2,Map3k5,Limd1,Mink1,Rragc,Nup210,Anapc5,Atp6v1f,Rraga,Lamtor2,Mapkapk3,Egln2,Tnik	46/-
11_Summary	GO Biological Processes	GO:0032103	positive regulation of response to external stimulus	-7.84839	-5.09397	11820,12266,12267,12273,12768,13032,13057,14173,14251,14456,14747,16149,16176,16362,16534,16803,17164,18003,18035,18081,18413,18438,19219,19229,19419,20085,20202,20306,21825,21897,21934,24088,27226,54123,56174,56620,56644,57266,57783,58217,66725,71481,71609,76438,80859,80861,100952,102626,170744,192176,193385,217069,227541,246707,268973,381308,434341,12259,12504,14284,15216,15284,16177,16190,1817…	App,C3,C3ar1,C5ar1,Ccr1,Ctsc,Cyba,Fgf2,Flot1,Gas6,Cmklr1,Cd74,Il1b,Irf1,Kcnn4,Lbp,Mapkapk2,Nedd9,Nfkbia,Ninj1,Osm,P2rx4,Ptger4,Ptk2b,Rasgrp1,Rps19,S100a9,Ccl7,Thbs1,Tlr1,Tnfrsf11a,Tlr2,Pla2g7,Irf7,Nagk,Clec4n,Clec7a,Cxcl14,Tnip1,Trem1,Lrrk2,Alpk1,Tradd,Rftn1,Nfkbiz,Dhx58,Emilin1,Mapkapk3,Tlr8,Flna,Ripor2,Trim25,Camk1d,Emilin2,Nlrc4,Ifi211,Nlrc5,C1qa,Cd4,Fosl2,Hfe,Hlx,Il1r1,Il4ra,Slc11a1,Pde4b,Cfp…	119/-
12_Summary	GO Biological Processes	GO:0043068	positive regulation of programmed cell death	-7.16492	-4.44941	11747,11783,11820,12048,12053,12257,12333,12385,13032,13036,13555,14089,14694,15368,15446,16176,16362,16403,17691,17869,17977,18128,18413,19252,19400,19411,20202,21664,21825,22187,22433,23882,26408,50883,53415,56177,56484,56644,56772,58217,59035,66437,66725,67184,68428,68867,71361,71609,74244,107392,107449,109032,194655,208727,227541,227753,229595,231872,246707,268973,11669,11749,11937,12051,1292…	Anxa5,Apaf1,App,Bcl2l1,Bcl6,Tspo,Capn1,Ctnna1,Ctsc,Ctsh,E2f1,Fap,Rack1,Hmox1,Hpgd,Il1b,Irf1,Itga6,Sik1,Myc,Ncoa1,Notch1,Osm,Dusp1,Rapsn,Rarg,S100a9,Phlda1,Thbs1,Ubb,Xbp1,Gadd45g,Map3k5,Chek2,Htatip2,Olfm1,Foxo3,Clec7a,Mllt11,Trem1,Carm1,Fis1,Lrrk2,Ndufa13,Steap3,Rnf122,Aifm2,Tradd,Atg7,Brms1,Unc5b,Sp110,Klf11,Hdac4,Camk1d,Gsn,Adamtsl4,Aimp2,Emilin2,Nlrc4,Aldh2,Anxa6,Atp2a1,Bcl3,Crip1,Dab2,P2rx4,S…	72/-
13_Summary	KEGG Pathway	mmu04142	Lysosome - Mus musculus (house mouse)	-7.12142	-4.41815	11305,11764,11766,12512,12752,13030,13032,13034,13036,13423,14667,16541,17159,17939,18173,19025,19156,27029,54397,64138,110006,211329	Abca2,Ap1b1,Ap1g2,Cd63,Cln3,Ctsb,Ctsc,Ctse,Ctsh,Dnase2a,Gm2a,Napsa,Man2b1,Naga,Slc11a1,Ctsa,Psap,Sgsh,Ppt2,Ctsz,Gusb,Ncoa7	22/-
14_Summary	GO Biological Processes	GO:0010876	lipid localization	-6.98891	-4.3104	11305,11307,11425,11520,11812,11813,12257,12752,14421,14667,14719,16176,16534,16803,18391,18605,18739,18782,18830,19156,20533,20652,22228,23943,26874,27376,56356,56520,66905,69076,71720,75750,75909,100017,231287,233979,235283,241633,320528,320951,329015	Abca2,Abcg1,Apoc4,Plin2,Apoc1,Apoc2,Tspo,Cln3,B4galnt1,Gm2a,Got2,Il1b,Kcnn4,Lbp,Sigmar1,Enpp1,Pitpnm1,Pla2g2d,Pltp,Psap,Slc4a1,Soat1,Ucp2,Esyt1,Abcd2,Slc25a10,Gltp,Nme4,Plin3,Triap1,Osbpl3,Slc10a6,Vmp1,Ldlrap1,Atp10d,Tpcn2,Gramd1b,Atp8b4,Vps13c,Pisd,Atg2a	41/-
15_Summary	GO Biological Processes	GO:0045862	positive regulation of proteolysis	-6.58021	-3.95411	11502,11783,11820,11983,12048,12335,12398,12795,13032,13036,13132,14066,14694,15511,16176,17387,17869,18570,19229,20202,21854,22393,22436,26408,27059,56644,64209,66437,66725,67269,74244,76524,76884,208117,215114,216157,227753,268973,12380,12550,12752,13014,13650,14456,15185,15216,16913,17035,18793,20317,20725,21825,22187,64138,65019,68135,69076,74772,75744,94232,171580,217344	Adam9,Apaf1,App,Atp5if1,Bcl2l1,Capn3,Cbfa2t3,Plk3,Ctsc,Ctsh,Dab2,F3,Rack1,Hspa1b,Il1b,Mmp14,Myc,Pdcd6,Ptk2b,S100a9,Timm17a,Wfs1,Xdh,Map3k5,Sh3d19,Clec7a,Herpud1,Fis1,Lrrk2,Agtpbp1,Atg7,Cln6,Cyfip2,Aph1b,Hip1,Tmem259,Gsn,Nlrc4,Cast,Cdh1,Cln3,Cstb,Rhbdf1,Gas6,Hdac6,Hfe,Psmb8,Lxn,Plaur,Serpinf1,Serpinb8,Thbs1,Ubb,Ctsz,Rpl23,Eif3h,Triap1,Atp13a2,Svip,Ubqln4,Mical1,Rhbdf2	62/-
16_Summary	GO Biological Processes	GO:0002521	leukocyte differentiation	-6.49548	-3.89281	11820,12051,12053,12393,12398,12504,12522,14104,14284,14369,15284,15902,16149,16190,16362,17095,17684,18605,18782,19156,19219,19229,19664,20442,20535,20737,21934,21985,22228,22724,22780,23882,24088,26362,28240,50932,54125,57259,65963,74775,75766,79221,80752,80859,98365,107817,381319,11502,11988,12259,12273,12523,14130,15975,16408,16803,17869,17999,18106,18173,19419,21897,22040,50723,56644,56715,5…	App,Bcl3,Bcl6,Runx2,Cbfa2t3,Cd4,Cd83,Fasn,Fosl2,Fzd7,Hlx,Id2,Cd74,Il4ra,Irf1,Lyl1,Cited2,Enpp1,Pla2g2d,Psap,Ptger4,Ptk2b,Rbpj,St3gal1,Slc4a2,Spn,Tnfrsf11a,Tpd52,Ucp2,Zbtb7b,Ikzf3,Gadd45g,Tlr2,Axl,Trpm2,Mink1,Polm,Tob2,Tmem176b,Lmbr1l,Dcstamp,Hdac9,Fam20c,Nfkbiz,Slamf9,Jmjd6,Batf3,Adam9,Slc7a2,C1qa,C5ar1,Cd84,Fcgr2b,Ifnar1,Itgal,Lbp,Myc,Nedd4,Cd244a,Slc11a1,Rasgrp1,Tlr1,Trex1,Icosl,Clec7a,Rabgef1,…	90/-
17_Summary	GO Biological Processes	GO:0141124	intracellular signaling cassette	-6.4433	-3.86497	11820,12051,12053,12267,12393,12504,12768,12795,13036,14173,14726,15368,16176,16362,16408,16443,17164,17869,17925,18035,18577,18578,18583,18584,19219,19229,19419,20410,20928,21825,21897,22433,24088,26408,26411,27261,50932,53608,53859,54196,54199,56212,56289,56715,56743,66725,71132,71609,71653,104418,108100,170744,192662,207565,208727,233979,234353,236266,260409,269608,319899,320292,381290,665113	App,Bcl3,Bcl6,C3ar1,Runx2,Cd4,Ccr1,Plk3,Ctsh,Fgf2,Pdpn,Hmox1,Il1b,Irf1,Itgal,Itsn1,Mapkapk2,Myc,Myo9b,Nfkbia,Pde4a,Pde4b,Pde7a,Pde8a,Ptger4,Ptk2b,Rasgrp1,Sorbs3,Abcc9,Thbs1,Tlr1,Xbp1,Tlr2,Map3k5,Map4k1,Dok3,Mink1,Map3k6,Map3k14,Pabpn1,Ccrl2,Rhog,Rassf1,Rabgef1,Lat2,Lrrk2,Cabyr,Tradd,Shtn1,Dgkz,Baiap2,Tlr8,Arhgdia,Camkk2,Hdac4,Tpcn2,Psd3,Alms1,Cdc42ep3,Plekhg5,Dock6,Rasgef1b,Atp2b4,Tnik	64/-
18_Summary	GO Biological Processes	GO:0051129	negative regulation of cellular component organization	-6.27224	-3.73694	11305,11812,11813,11820,11856,12048,12257,12333,12550,12642,13132,13367,13685,14089,14130,14694,14976,15185,15234,16176,16886,17216,17387,18128,18413,18627,19062,19158,19219,20660,20742,22121,22248,23790,24088,50918,52538,54198,56612,56715,59030,59035,63986,66725,68014,69076,69710,73914,74244,74694,74919,75744,94232,100952,107817,192176,226422,227753,231580,233781,235041,245857,380711	Abca2,Apoc1,Apoc2,App,Arhgap6,Bcl2l1,Tspo,Capn1,Cdh1,Ch25h,Dab2,Diaph1,Eif4ebp1,Fap,Fcgr2b,Rack1,Pfdn6,Hdac6,Hgf,Il1b,Limk2,Mcm2,Mmp14,Notch1,Osm,Per2,Inpp5k,Cyth2,Ptger4,Sorl1,Sptbn1,Rpl13a,Unc119,Coro1c,Tlr2,Myadm,Acaa2,Snx3,Pfdn5,Rabgef1,Mkks,Carm1,Gmfg,Lrrk2,Zwilch,Triap1,Arap1,Irak3,Atg7,Tbc1d30,Slc35f6,Svip,Ubqln4,Emilin1,Jmjd6,Flna,Rab29,Gsn,Gak,Xylt1,Kank2,Ssh3,Rap1gap2	63/-
19_Summary	GO Biological Processes	GO:0005975	carbohydrate metabolic process	-6.06879	-3.54958	14042,14345,14571,14635,14667,14751,14873,15531,17158,17159,17254,17869,17939,18605,18627,18641,18642,20452,21351,21991,22228,22619,26879,27376,28146,58810,59031,67526,67880,69976,71835,74777,75578,94284,108099,110006,212974,226101,227619,230796,245847,329015,14173,18577,19156,22436,23959,27029,27052,50773,56174,224794,11513,11637,11821,11958,14104,15356,20750,20928,21881,52538,54683,56520,66043,…	Ext1,Fut4,Gpd2,Galk1,Gm2a,Gpi1,Gsto1,Ndst1,Man2a1,Man2b1,Slc3a2,Myc,Naga,Enpp1,Per2,Pfkl,Pfkm,St8sia4,Taldo1,Tpi1,Ucp2,Siae,B3galnt1,Slc25a10,Serp1,Akr1a1,Chst12,Atg12,Dcxr,Galk2,Lancl2,Selenon,Fggy,Ugt1a6a,Prkag2,Gusb,Pgghg,Myof,Man1b1,Wdtc1,Amdhd2,Atg2a,Fgf2,Pde4a,Psap,Xdh,Nt5e,Sgsh,Aoah,Nt5c,Nagk,Enpp4,Adcy7,Ak2,Aprt,Atp5me,Fasn,Hmgcl,Spp1,Abcc9,Tkt,Acaa2,Prdx5,Nme4,Atp5f1d,Lrrk2,Ppcdc,Ndufb7,…	89/-
20_Summary	GO Biological Processes	GO:1900744	regulation of p38MAPK cascade	-5.83327	-3.3661	15234,16176,16534,18626,19252,22350,22436,23882,26408,50932,227753	Hgf,Il1b,Kcnn4,Per1,Dusp1,Ezr,Xdh,Gadd45g,Map3k5,Mink1,Gsn	11/-
1_Member	Reactome Gene Sets	R-MMU-72689	Formation of a pool of free 40S subunits	-13.9259	-9.66632	19899,19951,19982,20044,20054,20068,20085,20091,20102,20103,22121,22186,26961,27207,27370,56040,65019,66085,66481,67097,67115,67186,67427,67891,68135,73830,76846	Rpl18,Rpl32,Rpl36a,Rps14,Rps15,Rps17,Rps19,Rps3a1,Rps4x,Rps5,Rpl13a,Uba52,Rpl8,Rps11,Rps26,Rplp1,Rpl23,Eif3f,Rps21,Rps10,Rpl14,Rplp2,Rps20,Rpl4,Eif3h,Eif3k,Rps9	27/101
1_Member	Reactome Gene Sets	R-MMU-72613	Eukaryotic Translation Initiation	-12.895	-9.27323	13685,19899,19951,19982,20044,20054,20068,20085,20091,20102,20103,22121,22186,26961,27207,27370,56040,65019,66085,66481,67097,67115,67186,67427,67891,68135,73830,76846	Eif4ebp1,Rpl18,Rpl32,Rpl36a,Rps14,Rps15,Rps17,Rps19,Rps3a1,Rps4x,Rps5,Rpl13a,Uba52,Rpl8,Rps11,Rps26,Rplp1,Rpl23,Eif3f,Rps21,Rps10,Rpl14,Rplp2,Rps20,Rpl4,Eif3h,Eif3k,Rps9	28/119
1_Member	Reactome Gene Sets	R-MMU-72737	Cap-dependent Translation Initiation	-12.895	-9.27323	13685,19899,19951,19982,20044,20054,20068,20085,20091,20102,20103,22121,22186,26961,27207,27370,56040,65019,66085,66481,67097,67115,67186,67427,67891,68135,73830,76846	Eif4ebp1,Rpl18,Rpl32,Rpl36a,Rps14,Rps15,Rps17,Rps19,Rps3a1,Rps4x,Rps5,Rpl13a,Uba52,Rpl8,Rps11,Rps26,Rplp1,Rpl23,Eif3f,Rps21,Rps10,Rpl14,Rplp2,Rps20,Rpl4,Eif3h,Eif3k,Rps9	28/119
1_Member	Reactome Gene Sets	R-MMU-156827	L13a-mediated translational silencing of Ceruloplasmin expression	-12.8338	-9.27323	19899,19951,19982,20044,20054,20068,20085,20091,20102,20103,22121,22186,26961,27207,27370,56040,65019,66085,66481,67097,67115,67186,67427,67891,68135,73830,76846	Rpl18,Rpl32,Rpl36a,Rps14,Rps15,Rps17,Rps19,Rps3a1,Rps4x,Rps5,Rpl13a,Uba52,Rpl8,Rps11,Rps26,Rplp1,Rpl23,Eif3f,Rps21,Rps10,Rpl14,Rplp2,Rps20,Rpl4,Eif3h,Eif3k,Rps9	27/111
1_Member	Reactome Gene Sets	R-MMU-72706	GTP hydrolysis and joining of the 60S ribosomal subunit	-12.7319	-9.25051	19899,19951,19982,20044,20054,20068,20085,20091,20102,20103,22121,22186,26961,27207,27370,56040,65019,66085,66481,67097,67115,67186,67427,67891,68135,73830,76846	Rpl18,Rpl32,Rpl36a,Rps14,Rps15,Rps17,Rps19,Rps3a1,Rps4x,Rps5,Rpl13a,Uba52,Rpl8,Rps11,Rps26,Rplp1,Rpl23,Eif3f,Rps21,Rps10,Rpl14,Rplp2,Rps20,Rpl4,Eif3h,Eif3k,Rps9	27/112
1_Member	Reactome Gene Sets	R-MMU-1799339	SRP-dependent cotranslational protein targeting to membrane	-12.1968	-8.78235	19899,19951,19982,20044,20054,20068,20085,20091,20102,20103,22121,22186,26961,27207,27370,56040,65019,66481,67097,67115,67186,67427,67891,76846	Rpl18,Rpl32,Rpl36a,Rps14,Rps15,Rps17,Rps19,Rps3a1,Rps4x,Rps5,Rpl13a,Uba52,Rpl8,Rps11,Rps26,Rplp1,Rpl23,Rps21,Rps10,Rpl14,Rplp2,Rps20,Rpl4,Rps9	24/92
1_Member	Reactome Gene Sets	R-MMU-975956	Nonsense Mediated Decay (NMD) independent of the Exon Junction Complex (EJC)	-11.9749	-8.61841	19899,19951,19982,20044,20054,20068,20085,20091,20102,20103,22121,22186,26961,27207,27370,56040,65019,66481,67097,67115,67186,67427,67891,76846	Rpl18,Rpl32,Rpl36a,Rps14,Rps15,Rps17,Rps19,Rps3a1,Rps4x,Rps5,Rpl13a,Uba52,Rpl8,Rps11,Rps26,Rplp1,Rpl23,Rps21,Rps10,Rpl14,Rplp2,Rps20,Rpl4,Rps9	24/94
1_Member	GO Biological Processes	GO:0002181	cytoplasmic translation	-10.967	-7.73114	13685,19896,19899,19951,19982,20044,20054,20068,20085,20091,20102,20103,22121,22186,26961,27207,27370,56040,65019,66481,67097,67115,67186,67427,67891,76846	Eif4ebp1,Rpl10a,Rpl18,Rpl32,Rpl36a,Rps14,Rps15,Rps17,Rps19,Rps3a1,Rps4x,Rps5,Rpl13a,Uba52,Rpl8,Rps11,Rps26,Rplp1,Rpl23,Rps21,Rps10,Rpl14,Rplp2,Rps20,Rpl4,Rps9	26/122
1_Member	Reactome Gene Sets	R-MMU-927802	Nonsense-Mediated Decay (NMD)	-10.9493	-7.73114	19899,19951,19982,20044,20054,20068,20085,20091,20102,20103,22121,22186,26961,27207,27370,56040,60365,65019,66481,67097,67115,67186,67427,67891,76846	Rpl18,Rpl32,Rpl36a,Rps14,Rps15,Rps17,Rps19,Rps3a1,Rps4x,Rps5,Rpl13a,Uba52,Rpl8,Rps11,Rps26,Rplp1,Rbm8a,Rpl23,Rps21,Rps10,Rpl14,Rplp2,Rps20,Rpl4,Rps9	25/113
1_Member	Reactome Gene Sets	R-MMU-975957	Nonsense Mediated Decay (NMD) enhanced by the Exon Junction Complex (EJC)	-10.9493	-7.73114	19899,19951,19982,20044,20054,20068,20085,20091,20102,20103,22121,22186,26961,27207,27370,56040,60365,65019,66481,67097,67115,67186,67427,67891,76846	Rpl18,Rpl32,Rpl36a,Rps14,Rps15,Rps17,Rps19,Rps3a1,Rps4x,Rps5,Rpl13a,Uba52,Rpl8,Rps11,Rps26,Rplp1,Rbm8a,Rpl23,Rps21,Rps10,Rpl14,Rplp2,Rps20,Rpl4,Rps9	25/113
1_Member	GO Biological Processes	GO:0140241	translation at synapse	-10.1084	-6.96281	13629,19896,19951,19982,20044,20103,22121,22186,26961,27207,27370,65019,67097,67115,67186,67891	Eef2,Rpl10a,Rpl32,Rpl36a,Rps14,Rps5,Rpl13a,Uba52,Rpl8,Rps11,Rps26,Rpl23,Rps10,Rpl14,Rplp2,Rpl4	16/48
1_Member	GO Biological Processes	GO:0140242	translation at postsynapse	-10.1084	-6.96281	13629,19896,19951,19982,20044,20103,22121,22186,26961,27207,27370,65019,67097,67115,67186,67891	Eef2,Rpl10a,Rpl32,Rpl36a,Rps14,Rps5,Rpl13a,Uba52,Rpl8,Rps11,Rps26,Rpl23,Rps10,Rpl14,Rplp2,Rpl4	16/48
1_Member	WikiPathways	WP163	Cytoplasmic ribosomal proteins	-9.80292	-6.68947	19896,19899,19951,19982,20044,20054,20068,20085,20091,20102,20103,22121,26961,27207,27370,56040,66481,67097,67427,67891	Rpl10a,Rpl18,Rpl32,Rpl36a,Rps14,Rps15,Rps17,Rps19,Rps3a1,Rps4x,Rps5,Rpl13a,Rpl8,Rps11,Rps26,Rplp1,Rps21,Rps10,Rps20,Rpl4	20/81
1_Member	Reactome Gene Sets	R-MMU-72695	Formation of the ternary complex, and subsequently, the 43S complex	-9.51658	-6.4331	20044,20054,20068,20085,20091,20102,20103,27207,27370,66085,66481,67097,67427,68135,73830,76846	Rps14,Rps15,Rps17,Rps19,Rps3a1,Rps4x,Rps5,Rps11,Rps26,Eif3f,Rps21,Rps10,Rps20,Eif3h,Eif3k,Rps9	16/52
1_Member	Reactome Gene Sets	R-MMU-72662	Activation of the mRNA upon binding of the cap-binding complex and eIFs, and subsequent binding to 43S	-9.44196	-6.38651	13685,20044,20054,20068,20085,20091,20102,20103,27207,27370,66085,66481,67097,67427,68135,73830,76846	Eif4ebp1,Rps14,Rps15,Rps17,Rps19,Rps3a1,Rps4x,Rps5,Rps11,Rps26,Eif3f,Rps21,Rps10,Rps20,Eif3h,Eif3k,Rps9	17/60
1_Member	Reactome Gene Sets	R-MMU-6791226	Major pathway of rRNA processing in the nucleolus and cytosol	-9.2948	-6.33626	19899,19951,19982,20044,20054,20068,20085,20091,20102,20103,22121,22186,26961,27207,27370,27998,56040,65019,66481,67097,67115,67186,67427,67891,72554,76846,216156,225348,269470	Rpl18,Rpl32,Rpl36a,Rps14,Rps15,Rps17,Rps19,Rps3a1,Rps4x,Rps5,Rpl13a,Uba52,Rpl8,Rps11,Rps26,Exosc5,Rplp1,Rpl23,Rps21,Rps10,Rpl14,Rplp2,Rps20,Rpl4,Utp14a,Rps9,Wdr18,Wdr36,Wdr3	29/176
1_Member	Reactome Gene Sets	R-MMU-72312	rRNA processing	-9.2948	-6.33626	19899,19951,19982,20044,20054,20068,20085,20091,20102,20103,22121,22186,26961,27207,27370,27998,56040,65019,66481,67097,67115,67186,67427,67891,72554,76846,216156,225348,269470	Rpl18,Rpl32,Rpl36a,Rps14,Rps15,Rps17,Rps19,Rps3a1,Rps4x,Rps5,Rpl13a,Uba52,Rpl8,Rps11,Rps26,Exosc5,Rplp1,Rpl23,Rps21,Rps10,Rpl14,Rplp2,Rps20,Rpl4,Utp14a,Rps9,Wdr18,Wdr36,Wdr3	29/176
1_Member	Reactome Gene Sets	R-MMU-8868773	rRNA processing in the nucleus and cytosol	-9.2948	-6.33626	19899,19951,19982,20044,20054,20068,20085,20091,20102,20103,22121,22186,26961,27207,27370,27998,56040,65019,66481,67097,67115,67186,67427,67891,72554,76846,216156,225348,269470	Rpl18,Rpl32,Rpl36a,Rps14,Rps15,Rps17,Rps19,Rps3a1,Rps4x,Rps5,Rpl13a,Uba52,Rpl8,Rps11,Rps26,Exosc5,Rplp1,Rpl23,Rps21,Rps10,Rpl14,Rplp2,Rps20,Rpl4,Utp14a,Rps9,Wdr18,Wdr36,Wdr3	29/176
1_Member	GO Biological Processes	GO:0140236	translation at presynapse	-9.21181	-6.29466	19896,19951,19982,20044,20103,22121,22186,26961,27207,27370,65019,67097,67115,67186,67891	Rpl10a,Rpl32,Rpl36a,Rps14,Rps5,Rpl13a,Uba52,Rpl8,Rps11,Rps26,Rpl23,Rps10,Rpl14,Rplp2,Rpl4	15/47
1_Member	Reactome Gene Sets	R-MMU-72649	Translation initiation complex formation	-8.61513	-5.7535	20044,20054,20068,20085,20091,20102,20103,27207,27370,66085,66481,67097,67427,68135,73830,76846	Rps14,Rps15,Rps17,Rps19,Rps3a1,Rps4x,Rps5,Rps11,Rps26,Eif3f,Rps21,Rps10,Rps20,Eif3h,Eif3k,Rps9	16/59
1_Member	Reactome Gene Sets	R-MMU-72702	Ribosomal scanning and start codon recognition	-8.61513	-5.7535	20044,20054,20068,20085,20091,20102,20103,27207,27370,66085,66481,67097,67427,68135,73830,76846	Rps14,Rps15,Rps17,Rps19,Rps3a1,Rps4x,Rps5,Rps11,Rps26,Eif3f,Rps21,Rps10,Rps20,Eif3h,Eif3k,Rps9	16/59
1_Member	Reactome Gene Sets	R-MMU-72766	Translation	-7.99266	-5.21021	13629,13685,19899,19951,19982,20044,20054,20068,20085,20091,20102,20103,22121,22186,26961,27207,27370,55949,56040,65019,66085,66481,66656,67097,67115,67186,67427,67891,68135,73830,76846	Eef2,Eif4ebp1,Rpl18,Rpl32,Rpl36a,Rps14,Rps15,Rps17,Rps19,Rps3a1,Rps4x,Rps5,Rpl13a,Uba52,Rpl8,Rps11,Rps26,Eef1b2,Rplp1,Rpl23,Eif3f,Rps21,Eef1d,Rps10,Rpl14,Rplp2,Rps20,Rpl4,Eif3h,Eif3k,Rps9	31/224
1_Member	Reactome Gene Sets	R-MMU-8953854	Metabolism of RNA	-6.582	-3.95411	11810,15511,16913,17164,19172,19899,19951,19982,20044,20054,20068,20085,20091,20102,20103,20638,22121,22186,22187,23983,26443,26961,27207,27370,27998,54196,54563,56040,56417,60365,65019,66101,66125,66481,67089,67097,67115,67186,67427,67891,68106,68188,69583,72554,72654,72935,76846,116748,215051,216156,225348,233073,269470	Apobec1,Hspa1b,Psmb8,Mapkapk2,Psmb4,Rpl18,Rpl32,Rpl36a,Rps14,Rps15,Rps17,Rps19,Rps3a1,Rps4x,Rps5,Snrpb,Rpl13a,Uba52,Ubb,Pcbp1,Psma6,Rpl8,Rps11,Rps26,Exosc5,Pabpn1,Nup210,Rplp1,Adar,Rbm8a,Rpl23,Ppih,Sf3b5,Rps21,Psmc6,Rps10,Rpl14,Rplp2,Rps20,Rpl4,Nt5c3b,Sympk,Tnfsf13,Utp14a,Ccdc12,Ddx41,Rps9,Lsm10,Bud13,Wdr18,Wdr36,U2af1l4,Wdr3	53/582
1_Member	KEGG Pathway	mmu05171	Coronavirus disease - COVID-19 - Mus musculus (house mouse)	-6.33981	-3.78599	12259,12266,12267,12273,13058,15975,16176,18035,19896,19899,19951,19982,20044,20054,20068,20085,20091,20102,20103,22121,22186,24088,26961,27207,27370,56040,56417,65019,66481,67097,67115,67186,67427,67891,76846,170744	C1qa,C3,C3ar1,C5ar1,Cybb,Ifnar1,Il1b,Nfkbia,Rpl10a,Rpl18,Rpl32,Rpl36a,Rps14,Rps15,Rps17,Rps19,Rps3a1,Rps4x,Rps5,Rpl13a,Uba52,Tlr2,Rpl8,Rps11,Rps26,Rplp1,Adar,Rpl23,Rps21,Rps10,Rpl14,Rplp2,Rps20,Rpl4,Rps9,Tlr8	36/334
1_Member	GO Biological Processes	GO:0006412	translation	-4.8739	-2.53861	13629,13685,14694,19896,19899,19951,19982,20044,20054,20068,20085,20091,20102,20103,22121,22186,23874,26961,27207,27370,55949,56040,65019,66085,66481,66656,67097,67115,67186,67427,67891,68135,68915,69955,71984,73830,76846,231872	Eef2,Eif4ebp1,Rack1,Rpl10a,Rpl18,Rpl32,Rpl36a,Rps14,Rps15,Rps17,Rps19,Rps3a1,Rps4x,Rps5,Rpl13a,Uba52,Farsb,Rpl8,Rps11,Rps26,Eef1b2,Rplp1,Rpl23,Eif3f,Rps21,Eef1d,Rps10,Rpl14,Rplp2,Rps20,Rpl4,Eif3h,Vars2,Fars2,Sars2,Eif3k,Rps9,Aimp2	38/418
1_Member	KEGG Pathway	mmu03010	Ribosome - Mus musculus (house mouse)	-3.66043	-1.65709	19896,19899,19951,19982,20044,20054,20068,20085,20091,20102,20103,22121,22186,26961,27207,27370,56040,65019,66481,67097,67115,67186,67427,67891,76846	Rpl10a,Rpl18,Rpl32,Rpl36a,Rps14,Rps15,Rps17,Rps19,Rps3a1,Rps4x,Rps5,Rpl13a,Uba52,Rpl8,Rps11,Rps26,Rplp1,Rpl23,Rps21,Rps10,Rpl14,Rplp2,Rps20,Rpl4,Rps9	25/265
1_Member	GO Biological Processes	GO:0042274	ribosomal small subunit biogenesis	-2.75836	-1.10547	20044,20054,20068,20085,20091,20103,27207,66481,76846,78581,225348,269470	Rps14,Rps15,Rps17,Rps19,Rps3a1,Rps5,Rps11,Rps21,Rps9,Utp23,Wdr36,Wdr3	12/104
1_Member	CORUM	CORUM:3047	Parvulin-associated pre-rRNP complex	-2.2693	-0.808418	19899,20091,20102,22121,26961,67115,67891	Rpl18,Rps3a1,Rps4x,Rpl13a,Rpl8,Rpl14,Rpl4	7/50
1_Member	GO Biological Processes	GO:0042254	ribosome biogenesis	-2.07546	-0.706754	20044,20054,20068,20085,20091,20103,24014,27207,27998,66181,66481,67115,67236,72554,75751,76846,78581,107071,207932,216156,225348,269470,448850	Rps14,Rps15,Rps17,Rps19,Rps3a1,Rps5,Rnasel,Rps11,Exosc5,Nop10,Rps21,Rpl14,Cinp,Utp14a,Ipo4,Rps9,Utp23,Wdr74,Urb1,Wdr18,Wdr36,Wdr3,Znhit3	23/310
2_Member	Reactome Gene Sets	R-MMU-6798695	Neutrophil degranulation	-13.2022	-9.27323	11689,11758,11772,11783,11821,12266,12267,12273,12333,12512,13014,13030,13032,13036,13057,13058,13367,13629,13830,14130,14667,14751,15511,16408,17159,18173,18600,18636,18641,18793,19025,19156,20195,20202,22330,23845,24088,26364,27261,28240,56212,56620,63986,64138,67512,68724,69537,69660,72042,73690,74244,75744,76025,78388,83409,83768,102595,110006,223646,224794,227753,241633,381308	Alox5,Prdx6,Ap2a2,Apaf1,Aprt,C3,C3ar1,C5ar1,Capn1,Cd63,Cstb,Ctsb,Ctsc,Ctsh,Cyba,Cybb,Diaph1,Eef2,Stom,Fcgr2b,Gm2a,Gpi1,Hspa1b,Itgal,Man2b1,Slc11a1,Padi2,Cfp,Pfkl,Plaur,Ctsa,Psap,S100a11,S100a9,Vcl,Clec5a,Tlr2,Adgre5,Dok3,Trpm2,Rhog,Clec4n,Gmfg,Ctsz,Agpat2,Arl8a,Dnase1l1,Tmbim1,Cotl1,Glipr1,Atg7,Svip,Cant1,Mvp,Lamtor2,Dpp7,Plekho2,Gusb,Naprt,Enpp4,Gsn,Atp8b4,Ifi211	63/512
3_Member	Reactome Gene Sets	R-MMU-382551	Transport of small molecules	-9.38781	-6.35868	11307,11425,11772,11812,11813,11928,11932,11937,12752,12870,13358,13723,13830,14693,15216,15368,16913,17254,18173,18453,18830,19172,20499,20511,20533,20535,20652,20928,22186,22187,22782,23943,24115,26443,26874,27376,28240,56356,66144,67089,68428,70484,72017,74772,75750,100017,100434,100604,105847,107566,110895,114644,117160,170759,226144,227659,228368,231287,233979,241633,268512,331004,338365,381…	Abcg1,Apoc4,Ap2a2,Apoc1,Apoc2,Atp1a1,Atp1b2,Atp2a1,Cln3,Cp,Slc25a1,Emb,Stom,Gnb2,Hfe,Hmox1,Psmb8,Slc3a2,Slc11a1,P4hb,Pltp,Psmb4,Slc12a7,Slc1a2,Slc4a1,Slc4a2,Soat1,Abcc9,Uba52,Ubb,Slc30a1,Esyt1,Best1,Psma6,Abcd2,Slc25a10,Trpm2,Gltp,Atp6v1f,Psmc6,Steap3,Slc35d2,Cyb5r1,Atp13a2,Slc10a6,Ldlrap1,Slc44a1,Lrrc8c,Lmf2,Arl2bp,Slc9a4,Slc13a3,Ttyh2,Atp13a1,Erlin1,Slc2a6,Slc35c1,Atp10d,Tpcn2,Atp8b4,Slc26a11,S…	65/657
3_Member	Reactome Gene Sets	R-MMU-425407	SLC-mediated transmembrane transport	-3.53481	-1.57313	12870,13358,13723,17254,18173,20499,20511,20533,20535,22782,27376,70484,75750,100434,107566,110895,114644,227659,228368,268512,331004,338365	Cp,Slc25a1,Emb,Slc3a2,Slc11a1,Slc12a7,Slc1a2,Slc4a1,Slc4a2,Slc30a1,Slc25a10,Slc35d2,Slc10a6,Slc44a1,Arl2bp,Slc9a4,Slc13a3,Slc2a6,Slc35c1,Slc26a11,Slc9a9,Slc41a2	22/224
4_Member	GO Biological Processes	GO:0050900	leukocyte migration	-9.22033	-6.29466	11689,12273,12490,12642,12768,12802,14042,14345,14456,16176,16403,16408,16534,16803,17925,18003,18081,18578,18605,18810,20085,20202,20306,20737,20750,22121,24088,28240,56715,58217,64095,66102,98365,171486,246177	Alox5,C5ar1,Cd34,Ch25h,Ccr1,Cnr2,Ext1,Fut4,Gas6,Il1b,Itga6,Itgal,Kcnn4,Lbp,Myo9b,Nedd9,Ninj1,Pde4b,Enpp1,Plec,Rps19,S100a9,Ccl7,Spn,Spp1,Rpl13a,Tlr2,Trpm2,Rabgef1,Trem1,Gpr35,Cxcl16,Slamf9,Cd99l2,Myo1g	35/247
4_Member	GO Biological Processes	GO:0030595	leukocyte chemotaxis	-6.61277	-3.96598	11689,12273,12642,12768,12802,14456,16176,16803,17925,18081,18578,18810,20085,20202,20306,20750,22121,28240,58217,64095,66102,98365	Alox5,C5ar1,Ch25h,Ccr1,Cnr2,Gas6,Il1b,Lbp,Myo9b,Ninj1,Pde4b,Plec,Rps19,S100a9,Ccl7,Spp1,Rpl13a,Trpm2,Trem1,Gpr35,Cxcl16,Slamf9	22/144
4_Member	GO Biological Processes	GO:0071674	mononuclear cell migration	-6.45575	-3.86828	11689,12642,14042,14345,14456,16408,16534,17925,18003,18081,18605,18810,20085,22121,28240,64095,66102,98365,246177	Alox5,Ch25h,Ext1,Fut4,Gas6,Itgal,Kcnn4,Myo9b,Nedd9,Ninj1,Enpp1,Plec,Rps19,Rpl13a,Trpm2,Gpr35,Cxcl16,Slamf9,Myo1g	19/113
4_Member	GO Biological Processes	GO:0060326	cell chemotaxis	-5.44207	-3.0276	11689,12273,12642,12768,12802,14456,15234,16176,16803,17925,18081,18578,18810,20085,20202,20306,20750,22121,28240,54199,56212,58217,64095,66102,98365,269608	Alox5,C5ar1,Ch25h,Ccr1,Cnr2,Gas6,Hgf,Il1b,Lbp,Myo9b,Ninj1,Pde4b,Plec,Rps19,S100a9,Ccl7,Spp1,Rpl13a,Trpm2,Ccrl2,Rhog,Trem1,Gpr35,Cxcl16,Slamf9,Plekhg5	26/221
4_Member	GO Biological Processes	GO:0040011	locomotion	-5.18783	-2.80908	11689,12267,12273,12642,12768,12802,13367,14456,14747,15234,16176,16803,17925,18081,18578,18717,18810,20085,20202,20306,20359,20750,22121,28240,54199,56212,58217,64095,66049,66102,68119,76524,98365,193385,269608	Alox5,C3ar1,C5ar1,Ch25h,Ccr1,Cnr2,Diaph1,Gas6,Cmklr1,Hgf,Il1b,Lbp,Myo9b,Ninj1,Pde4b,Pip5k1c,Plec,Rps19,S100a9,Ccl7,Sema6b,Spp1,Rpl13a,Trpm2,Ccrl2,Rhog,Trem1,Gpr35,Rogdi,Cxcl16,Cmtm3,Cln6,Slamf9,Ripor2,Plekhg5	35/359
4_Member	GO Biological Processes	GO:0006935	chemotaxis	-4.82973	-2.50968	11689,12267,12273,12642,12768,12802,14456,14747,15234,16176,16803,17925,18081,18578,18717,18810,20085,20202,20306,20359,20750,22121,28240,54199,56212,58217,64095,66102,68119,98365,193385,269608	Alox5,C3ar1,C5ar1,Ch25h,Ccr1,Cnr2,Gas6,Cmklr1,Hgf,Il1b,Lbp,Myo9b,Ninj1,Pde4b,Pip5k1c,Plec,Rps19,S100a9,Ccl7,Sema6b,Spp1,Rpl13a,Trpm2,Ccrl2,Rhog,Trem1,Gpr35,Cxcl16,Cmtm3,Slamf9,Ripor2,Plekhg5	32/327
4_Member	GO Biological Processes	GO:0042330	taxis	-4.77641	-2.46623	11689,12267,12273,12642,12768,12802,14456,14747,15234,16176,16803,17925,18081,18578,18717,18810,20085,20202,20306,20359,20750,22121,28240,54199,56212,58217,64095,66102,68119,98365,193385,269608	Alox5,C3ar1,C5ar1,Ch25h,Ccr1,Cnr2,Gas6,Cmklr1,Hgf,Il1b,Lbp,Myo9b,Ninj1,Pde4b,Pip5k1c,Plec,Rps19,S100a9,Ccl7,Sema6b,Spp1,Rpl13a,Trpm2,Ccrl2,Rhog,Trem1,Gpr35,Cxcl16,Cmtm3,Slamf9,Ripor2,Plekhg5	32/329
4_Member	GO Biological Processes	GO:0097529	myeloid leukocyte migration	-3.37244	-1.48394	12273,16176,16803,17925,18081,18578,18605,20085,20202,20306,20750,22121,24088,56715,58217,64095	C5ar1,Il1b,Lbp,Myo9b,Ninj1,Pde4b,Enpp1,Rps19,S100a9,Ccl7,Spp1,Rpl13a,Tlr2,Rabgef1,Trem1,Gpr35	16/142
5_Member	GO Biological Processes	GO:0006954	inflammatory response	-9.17022	-6.27238	11689,11820,11988,12053,12259,12266,12267,12273,12768,12802,13057,13058,14042,14066,14104,14130,14284,14345,14747,15368,15531,16176,16177,16181,16190,16803,17035,17164,18081,18128,18173,18605,18782,19217,19219,19419,19664,20202,20306,21825,21897,22040,24058,24088,26362,27226,54199,56644,57783,57914,69038,79221,80859,170744,192187,227541,229534,268973,328417	Alox5,App,Slc7a2,Bcl6,C1qa,C3,C3ar1,C5ar1,Ccr1,Cnr2,Cyba,Cybb,Ext1,F3,Fasn,Fcgr2b,Fosl2,Fut4,Cmklr1,Hmox1,Ndst1,Il1b,Il1r1,Il1rn,Il4ra,Lbp,Lxn,Mapkapk2,Ninj1,Notch1,Slc11a1,Enpp1,Pla2g2d,Ptger2,Ptger4,Rasgrp1,Rbpj,S100a9,Ccl7,Thbs1,Tlr1,Trex1,Sigirr,Tlr2,Axl,Pla2g7,Ccrl2,Clec7a,Tnip1,Crlf2,Tmem258,Hdac9,Nfkbiz,Tlr8,Stab1,Camk1d,Pbxip1,Nlrc4,Parp4	59/575
6_Member	GO Biological Processes	GO:0001816	cytokine production	-8.37592	-5.53132	12051,12053,12504,12522,14042,14130,14284,14456,15975,16176,16803,17164,18128,18173,18605,19217,19219,19419,19664,20737,20928,22040,23882,24088,26362,54123,56715,57914,58217,80859,98365	Bcl3,Bcl6,Cd4,Cd83,Ext1,Fcgr2b,Fosl2,Gas6,Ifnar1,Il1b,Lbp,Mapkapk2,Notch1,Slc11a1,Enpp1,Ptger2,Ptger4,Rasgrp1,Rbpj,Spn,Abcc9,Trex1,Gadd45g,Tlr2,Axl,Irf7,Rabgef1,Crlf2,Trem1,Nfkbiz,Slamf9	31/216
6_Member	GO Biological Processes	GO:0002367	cytokine production involved in immune response	-5.24344	-2.85893	12053,14284,14456,16176,17164,18173,19419,24088,26362,56715,57914,58217,98365	Bcl6,Fosl2,Gas6,Il1b,Mapkapk2,Slc11a1,Rasgrp1,Tlr2,Axl,Rabgef1,Crlf2,Trem1,Slamf9	13/68
6_Member	GO Biological Processes	GO:0032602	chemokine production	-3.83554	-1.75978	14042,14284,24088,58217,80859,98365	Ext1,Fosl2,Tlr2,Trem1,Nfkbiz,Slamf9	6/20
6_Member	GO Biological Processes	GO:0061082	myeloid leukocyte cytokine production	-3.28588	-1.43115	12053,14456,16176,17164,19419,24088,26362,56715	Bcl6,Gas6,Il1b,Mapkapk2,Rasgrp1,Tlr2,Axl,Rabgef1	8/44
6_Member	GO Biological Processes	GO:0002440	production of molecular mediator of immune response	-2.3455	-0.845667	12053,14130,14284,14456,16176,17164,17686,18173,18605,19419,22040,24088,26362,50723,54125,56715,57914,58217,69583,80859,98365	Bcl6,Fcgr2b,Fosl2,Gas6,Il1b,Mapkapk2,Msh3,Slc11a1,Enpp1,Rasgrp1,Trex1,Tlr2,Axl,Icosl,Polm,Rabgef1,Crlf2,Trem1,Tnfsf13,Nfkbiz,Slamf9	21/260
7_Member	GO Biological Processes	GO:0098657	import into cell	-8.2371	-5.40889	11772,11820,11890,11928,11932,11988,12752,13132,13367,14130,14251,14456,16408,16443,16513,16524,17164,17254,17533,17913,17972,17999,18173,18717,18806,20499,20511,20514,20660,20928,21825,22040,22248,22350,23790,26362,28240,52009,52055,56644,56715,66102,66147,66725,67602,67739,74775,100017,100604,102626,106628,107817,110895,194590,215114,226421,227753,227801,231580,233979,240055,246177,331004,433926	Ap2a2,App,Asgr2,Atp1a1,Atp1b2,Slc7a2,Cln3,Dab2,Diaph1,Fcgr2b,Flot1,Gas6,Itgal,Itsn1,Kcnj10,Kcnj9,Mapkapk2,Slc3a2,Mrc1,Myo1c,Ncf4,Nedd4,Slc11a1,Pip5k1c,Pld2,Slc12a7,Slc1a2,Slc1a5,Sorl1,Abcc9,Thbs1,Trex1,Unc119,Ezr,Coro1c,Axl,Trpm2,Jpt2,Rab11fip5,Clec7a,Rabgef1,Cxcl16,Necap2,Lrrk2,Necap1,Slc48a1,Lmbr1l,Ldlrap1,Lrrc8c,Mapkapk3,Trip10,Jmjd6,Slc9a4,Reps2,Hip1,Rab7b,Gsn,Dennd1a,Gak,Tpcn2,Neurl1b,Myo1g,…	64/686
7_Member	GO Biological Processes	GO:0006897	endocytosis	-6.9789	-4.3104	11772,11820,11890,12752,13132,13367,14130,14251,14456,16408,16443,17164,17533,17913,17972,17999,18173,18717,18806,20660,21825,22040,22248,22350,23790,26362,52009,52055,56644,56715,66102,66147,66725,67602,67739,74775,100017,102626,106628,107817,194590,215114,226421,227753,227801,231580,233979,240055,246177	Ap2a2,App,Asgr2,Cln3,Dab2,Diaph1,Fcgr2b,Flot1,Gas6,Itgal,Itsn1,Mapkapk2,Mrc1,Myo1c,Ncf4,Nedd4,Slc11a1,Pip5k1c,Pld2,Sorl1,Thbs1,Trex1,Unc119,Ezr,Coro1c,Axl,Jpt2,Rab11fip5,Clec7a,Rabgef1,Cxcl16,Necap2,Lrrk2,Necap1,Slc48a1,Lmbr1l,Ldlrap1,Mapkapk3,Trip10,Jmjd6,Reps2,Hip1,Rab7b,Gsn,Dennd1a,Gak,Tpcn2,Neurl1b,Myo1g	49/504
7_Member	GO Biological Processes	GO:0006909	phagocytosis	-3.47436	-1.54608	12752,14130,14456,16408,17972,18173,18717,21825,22040,23790,26362,56644,67739,107817,226421,227753,246177	Cln3,Fcgr2b,Gas6,Itgal,Ncf4,Slc11a1,Pip5k1c,Thbs1,Trex1,Coro1c,Axl,Clec7a,Slc48a1,Jmjd6,Rab7b,Gsn,Myo1g	17/153
7_Member	GO Biological Processes	GO:0006898	receptor-mediated endocytosis	-3.00769	-1.25597	11772,12752,13132,14130,16443,17533,17999,18806,20660,22350,52055,56715,66102,74775,100017,231580,233979	Ap2a2,Cln3,Dab2,Fcgr2b,Itsn1,Mrc1,Nedd4,Pld2,Sorl1,Ezr,Rab11fip5,Rabgef1,Cxcl16,Lmbr1l,Ldlrap1,Gak,Tpcn2	17/168
8_Member	GO Biological Processes	GO:0002685	regulation of leukocyte migration	-8.03398	-5.22581	11820,12267,12273,12333,12768,14345,14456,14747,16149,16176,16177,16803,17387,17524,18003,18081,18438,18600,19219,19229,19252,20306,20737,21825,24088,27226,56715,57266,58217,100952,171486,193385,227541	App,C3ar1,C5ar1,Capn1,Ccr1,Fut4,Gas6,Cmklr1,Cd74,Il1b,Il1r1,Lbp,Mmp14,Mpp1,Nedd9,Ninj1,P2rx4,Padi2,Ptger4,Ptk2b,Dusp1,Ccl7,Spn,Thbs1,Tlr2,Pla2g7,Rabgef1,Cxcl14,Trem1,Emilin1,Cd99l2,Ripor2,Camk1d	33/248
8_Member	GO Biological Processes	GO:0002687	positive regulation of leukocyte migration	-7.54617	-4.80511	11820,12267,12273,12768,14345,14456,14747,16149,16176,16177,16803,17387,18003,18438,19219,19229,20306,20737,21825,24088,27226,57266,58217,171486,193385,227541	App,C3ar1,C5ar1,Ccr1,Fut4,Gas6,Cmklr1,Cd74,Il1b,Il1r1,Lbp,Mmp14,Nedd9,P2rx4,Ptger4,Ptk2b,Ccl7,Spn,Thbs1,Tlr2,Pla2g7,Cxcl14,Trem1,Cd99l2,Ripor2,Camk1d	26/173
8_Member	GO Biological Processes	GO:0002688	regulation of leukocyte chemotaxis	-7.18091	-4.45282	11820,12267,12273,12768,14456,14747,16149,16176,16803,17524,18003,18081,18600,19229,19252,20306,21825,27226,57266,58217,193385,227541	App,C3ar1,C5ar1,Ccr1,Gas6,Cmklr1,Cd74,Il1b,Lbp,Mpp1,Nedd9,Ninj1,Padi2,Ptk2b,Dusp1,Ccl7,Thbs1,Pla2g7,Cxcl14,Trem1,Ripor2,Camk1d	22/134
8_Member	GO Biological Processes	GO:0030335	positive regulation of cell migration	-7.01529	-4.32392	11502,11820,12267,12273,12768,13036,13132,13367,14066,14173,14345,14456,14694,14726,14747,14751,15185,15234,15368,16149,16176,16177,16403,16803,17387,17869,17913,18003,18128,18438,18570,18806,19219,19229,20195,20306,20359,20737,21825,22433,24088,27226,50918,56644,57266,58217,66102,71609,71653,79221,171486,192176,193385,208727,227541,384783	Adam9,App,C3ar1,C5ar1,Ccr1,Ctsh,Dab2,Diaph1,F3,Fgf2,Fut4,Gas6,Rack1,Pdpn,Cmklr1,Gpi1,Hdac6,Hgf,Hmox1,Cd74,Il1b,Il1r1,Itga6,Lbp,Mmp14,Myc,Myo1c,Nedd9,Notch1,P2rx4,Pdcd6,Pld2,Ptger4,Ptk2b,S100a11,Ccl7,Sema6b,Spn,Thbs1,Xbp1,Tlr2,Pla2g7,Myadm,Clec7a,Cxcl14,Trem1,Cxcl16,Tradd,Shtn1,Hdac9,Cd99l2,Flna,Ripor2,Hdac4,Camk1d,Irs2	56/611
8_Member	GO Biological Processes	GO:2000147	positive regulation of cell motility	-6.68921	-4.0317	11502,11820,12053,12267,12273,12768,13036,13132,13367,14066,14173,14345,14456,14694,14726,14747,14751,15185,15234,15368,16149,16176,16177,16403,16803,17387,17869,17913,18003,18128,18438,18570,18806,19219,19229,20195,20306,20359,20737,21825,22433,24088,27226,50918,56644,57266,58217,66102,71609,71653,79221,171486,192176,193385,208727,227541,384783	Adam9,App,Bcl6,C3ar1,C5ar1,Ccr1,Ctsh,Dab2,Diaph1,F3,Fgf2,Fut4,Gas6,Rack1,Pdpn,Cmklr1,Gpi1,Hdac6,Hgf,Hmox1,Cd74,Il1b,Il1r1,Itga6,Lbp,Mmp14,Myc,Myo1c,Nedd9,Notch1,P2rx4,Pdcd6,Pld2,Ptger4,Ptk2b,S100a11,Ccl7,Sema6b,Spn,Thbs1,Xbp1,Tlr2,Pla2g7,Myadm,Clec7a,Cxcl14,Trem1,Cxcl16,Tradd,Shtn1,Hdac9,Cd99l2,Flna,Ripor2,Hdac4,Camk1d,Irs2	57/641
8_Member	GO Biological Processes	GO:0071675	regulation of mononuclear cell migration	-6.55906	-3.94294	11820,12267,12273,12768,14456,14747,17387,18003,18081,18438,18600,19229,19252,20306,20737,21825,27226,57266,58217,100952,171486,193385	App,C3ar1,C5ar1,Ccr1,Gas6,Cmklr1,Mmp14,Nedd9,Ninj1,P2rx4,Padi2,Ptk2b,Dusp1,Ccl7,Spn,Thbs1,Pla2g7,Cxcl14,Trem1,Emilin1,Cd99l2,Ripor2	22/145
8_Member	GO Biological Processes	GO:0040017	positive regulation of locomotion	-6.33799	-3.78599	11502,11820,12053,12267,12273,12768,13036,13132,13367,14066,14173,14345,14456,14694,14726,14747,14751,15185,15234,15368,16149,16176,16177,16403,16803,17387,17869,17913,18003,18128,18438,18570,18806,19219,19229,20195,20306,20359,20737,21825,22433,24088,27226,50918,56644,57266,58217,66102,71609,71653,79221,171486,192176,193385,208727,227541,384783	Adam9,App,Bcl6,C3ar1,C5ar1,Ccr1,Ctsh,Dab2,Diaph1,F3,Fgf2,Fut4,Gas6,Rack1,Pdpn,Cmklr1,Gpi1,Hdac6,Hgf,Hmox1,Cd74,Il1b,Il1r1,Itga6,Lbp,Mmp14,Myc,Myo1c,Nedd9,Notch1,P2rx4,Pdcd6,Pld2,Ptger4,Ptk2b,S100a11,Ccl7,Sema6b,Spn,Thbs1,Xbp1,Tlr2,Pla2g7,Myadm,Clec7a,Cxcl14,Trem1,Cxcl16,Tradd,Shtn1,Hdac9,Cd99l2,Flna,Ripor2,Hdac4,Camk1d,Irs2	57/657
8_Member	GO Biological Processes	GO:0002690	positive regulation of leukocyte chemotaxis	-6.09124	-3.56406	11820,12267,12273,12768,14456,14747,16149,16176,16803,18003,19229,20306,21825,27226,57266,58217,193385,227541	App,C3ar1,C5ar1,Ccr1,Gas6,Cmklr1,Cd74,Il1b,Lbp,Nedd9,Ptk2b,Ccl7,Thbs1,Pla2g7,Cxcl14,Trem1,Ripor2,Camk1d	18/108
8_Member	GO Biological Processes	GO:0071677	positive regulation of mononuclear cell migration	-5.91198	-3.41584	11820,12267,12273,12768,14456,14747,17387,18003,18438,19229,20306,20737,21825,27226,57266,58217,171486	App,C3ar1,C5ar1,Ccr1,Gas6,Cmklr1,Mmp14,Nedd9,P2rx4,Ptk2b,Ccl7,Spn,Thbs1,Pla2g7,Cxcl14,Trem1,Cd99l2	17/100
8_Member	GO Biological Processes	GO:1902624	positive regulation of neutrophil migration	-5.8872	-3.40578	12267,12273,14345,16149,16176,16177,16803,19219,24088,171486,193385,227541	C3ar1,C5ar1,Fut4,Cd74,Il1b,Il1r1,Lbp,Ptger4,Tlr2,Cd99l2,Ripor2,Camk1d	12/51
8_Member	GO Biological Processes	GO:1902622	regulation of neutrophil migration	-5.71644	-3.26305	12267,12273,14345,16149,16176,16177,16803,17524,19219,24088,171486,193385,227541	C3ar1,C5ar1,Fut4,Cd74,Il1b,Il1r1,Lbp,Mpp1,Ptger4,Tlr2,Cd99l2,Ripor2,Camk1d	13/62
8_Member	GO Biological Processes	GO:0050920	regulation of chemotaxis	-5.36972	-2.96748	11820,12267,12273,12768,14173,14456,14747,16149,16176,16803,17524,18003,18081,18128,18438,18600,19229,19252,20306,20440,21825,27226,57266,58217,193385,227541	App,C3ar1,C5ar1,Ccr1,Fgf2,Gas6,Cmklr1,Cd74,Il1b,Lbp,Mpp1,Nedd9,Ninj1,Notch1,P2rx4,Padi2,Ptk2b,Dusp1,Ccl7,St6gal1,Thbs1,Pla2g7,Cxcl14,Trem1,Ripor2,Camk1d	26/223
8_Member	GO Biological Processes	GO:0050921	positive regulation of chemotaxis	-4.63513	-2.34869	11820,12267,12273,12768,14173,14456,14747,16149,16176,16803,18003,18438,19229,20306,21825,27226,57266,58217,193385,227541	App,C3ar1,C5ar1,Ccr1,Fgf2,Gas6,Cmklr1,Cd74,Il1b,Lbp,Nedd9,P2rx4,Ptk2b,Ccl7,Thbs1,Pla2g7,Cxcl14,Trem1,Ripor2,Camk1d	20/162
8_Member	GO Biological Processes	GO:0071622	regulation of granulocyte chemotaxis	-3.83508	-1.75978	12267,12273,14747,16149,16176,16803,17524,21825,58217,193385,227541	C3ar1,C5ar1,Cmklr1,Cd74,Il1b,Lbp,Mpp1,Thbs1,Trem1,Ripor2,Camk1d	11/68
8_Member	GO Biological Processes	GO:1905521	regulation of macrophage migration	-3.66563	-1.65709	12267,12273,14747,17387,18438,19229,21825,58217,100952	C3ar1,C5ar1,Cmklr1,Mmp14,P2rx4,Ptk2b,Thbs1,Trem1,Emilin1	9/49
8_Member	GO Biological Processes	GO:1905523	positive regulation of macrophage migration	-3.54066	-1.57313	12267,12273,14747,17387,18438,21825,58217	C3ar1,C5ar1,Cmklr1,Mmp14,P2rx4,Thbs1,Trem1	7/31
8_Member	GO Biological Processes	GO:0090022	regulation of neutrophil chemotaxis	-3.21739	-1.39239	12267,12273,16149,16176,16803,17524,193385,227541	C3ar1,C5ar1,Cd74,Il1b,Lbp,Mpp1,Ripor2,Camk1d	8/45
8_Member	GO Biological Processes	GO:0090023	positive regulation of neutrophil chemotaxis	-3.04572	-1.28097	12267,12273,16149,16176,16803,193385,227541	C3ar1,C5ar1,Cd74,Il1b,Lbp,Ripor2,Camk1d	7/37
8_Member	GO Biological Processes	GO:0071624	positive regulation of granulocyte chemotaxis	-2.83658	-1.15794	12267,12273,16149,16176,16803,193385,227541	C3ar1,C5ar1,Cd74,Il1b,Lbp,Ripor2,Camk1d	7/40
8_Member	GO Biological Processes	GO:0010758	regulation of macrophage chemotaxis	-2.519	-0.956539	12267,12273,14747,19229,21825,58217	C3ar1,C5ar1,Cmklr1,Ptk2b,Thbs1,Trem1	6/34
8_Member	GO Biological Processes	GO:0002430	complement receptor mediated signaling pathway	-2.49385	-0.9444	12266,12267,12273,14747	C3,C3ar1,C5ar1,Cmklr1	4/15
8_Member	GO Biological Processes	GO:0010759	positive regulation of macrophage chemotaxis	-2.41781	-0.893836	12267,12273,14747,21825,58217	C3ar1,C5ar1,Cmklr1,Thbs1,Trem1	5/25
9_Member	GO Biological Processes	GO:0001819	positive regulation of cytokine production	-8.02298	-5.22581	11820,12051,12266,12267,12273,12490,12522,12523,13057,13058,14066,14130,14251,15234,15975,16149,16176,16177,16190,16362,16803,17164,18106,18173,18413,18578,19219,19419,20660,20737,20742,21825,21897,22433,22724,23845,24088,50723,54123,56620,56644,57914,66725,67512,71609,73914,76438,80861,170744,214855,217203,226421,268973	App,Bcl3,C3,C3ar1,C5ar1,Cd34,Cd83,Cd84,Cyba,Cybb,F3,Fcgr2b,Flot1,Hgf,Ifnar1,Cd74,Il1b,Il1r1,Il4ra,Irf1,Lbp,Mapkapk2,Cd244a,Slc11a1,Osm,Pde4b,Ptger4,Rasgrp1,Sorl1,Spn,Sptbn1,Thbs1,Tlr1,Xbp1,Zbtb7b,Clec5a,Tlr2,Icosl,Irf7,Clec4n,Clec7a,Crlf2,Lrrk2,Agpat2,Tradd,Irak3,Rftn1,Dhx58,Tlr8,Arid5a,Tmem106a,Rab7b,Nlrc4	53/526
9_Member	GO Biological Processes	GO:0032680	regulation of tumor necrosis factor production	-5.53121	-3.09771	11820,12051,12257,12523,13057,13058,14130,14456,16534,16803,17164,19219,19419,20737,21825,21897,22040,24088,26362,56644,66725,73914,214855,217203	App,Bcl3,Tspo,Cd84,Cyba,Cybb,Fcgr2b,Gas6,Kcnn4,Lbp,Mapkapk2,Ptger4,Rasgrp1,Spn,Thbs1,Tlr1,Trex1,Tlr2,Axl,Clec7a,Lrrk2,Irak3,Arid5a,Tmem106a	24/192
9_Member	GO Biological Processes	GO:1903555	regulation of tumor necrosis factor superfamily cytokine production	-5.41242	-3.00411	11820,12051,12257,12523,13057,13058,14130,14456,16534,16803,17164,19219,19419,20737,21825,21897,22040,24088,26362,56644,66725,73914,214855,217203	App,Bcl3,Tspo,Cd84,Cyba,Cybb,Fcgr2b,Gas6,Kcnn4,Lbp,Mapkapk2,Ptger4,Rasgrp1,Spn,Thbs1,Tlr1,Trex1,Tlr2,Axl,Clec7a,Lrrk2,Irak3,Arid5a,Tmem106a	24/195
9_Member	GO Biological Processes	GO:0032760	positive regulation of tumor necrosis factor production	-4.32256	-2.08838	11820,12523,13057,13058,14130,16803,17164,19419,20737,21825,21897,24088,56644,66725,214855,217203	App,Cd84,Cyba,Cybb,Fcgr2b,Lbp,Mapkapk2,Rasgrp1,Spn,Thbs1,Tlr1,Tlr2,Clec7a,Lrrk2,Arid5a,Tmem106a	16/118
9_Member	GO Biological Processes	GO:1903557	positive regulation of tumor necrosis factor superfamily cytokine production	-4.23258	-2.04856	11820,12523,13057,13058,14130,16803,17164,19419,20737,21825,21897,24088,56644,66725,214855,217203	App,Cd84,Cyba,Cybb,Fcgr2b,Lbp,Mapkapk2,Rasgrp1,Spn,Thbs1,Tlr1,Tlr2,Clec7a,Lrrk2,Arid5a,Tmem106a	16/120
9_Member	GO Biological Processes	GO:0032757	positive regulation of interleukin-8 production	-3.77274	-1.71729	14066,16149,16176,16803,18106,19219,21897,24088,56644,170744	F3,Cd74,Il1b,Lbp,Cd244a,Ptger4,Tlr1,Tlr2,Clec7a,Tlr8	10/58
9_Member	GO Biological Processes	GO:0032675	regulation of interleukin-6 production	-3.74658	-1.70449	11820,12523,13057,14456,15234,16149,16176,16803,17164,21897,22433,24088,56644,56715,73914,170744,214855,217203,226421	App,Cd84,Cyba,Gas6,Hgf,Cd74,Il1b,Lbp,Mapkapk2,Tlr1,Xbp1,Tlr2,Clec7a,Rabgef1,Irak3,Tlr8,Arid5a,Tmem106a,Rab7b	19/173
9_Member	GO Biological Processes	GO:0032677	regulation of interleukin-8 production	-3.44965	-1.54226	12051,14066,16149,16176,16803,18106,19219,21897,24088,56644,170744	Bcl3,F3,Cd74,Il1b,Lbp,Cd244a,Ptger4,Tlr1,Tlr2,Clec7a,Tlr8	11/75
9_Member	GO Biological Processes	GO:0032755	positive regulation of interleukin-6 production	-2.9303	-1.2102	11820,13057,16149,16176,16803,21897,22433,24088,56644,170744,214855,217203,226421	App,Cyba,Cd74,Il1b,Lbp,Tlr1,Xbp1,Tlr2,Clec7a,Tlr8,Arid5a,Tmem106a,Rab7b	13/113
9_Member	KEGG Pathway	mmu05152	Tuberculosis - Mus musculus (house mouse)	-2.29831	-0.819055	11783,12265,12266,12795,14130,16149,16155,16176,16803,17533,21897,24088,56644,71609,75600,170767	Apaf1,Ciita,C3,Plk3,Fcgr2b,Cd74,Il10rb,Il1b,Lbp,Mrc1,Tlr1,Tlr2,Clec7a,Tradd,Calml4,Rfxap	16/180
10_Member	Reactome Gene Sets	R-MMU-9711123	Cellular response to chemical stress	-7.9098	-5.14159	11758,12857,12858,12861,12864,12868,13057,13058,15368,16913,17972,17977,18412,18453,19172,20463,22166,22186,22187,26443,26462,54683,56551,59035,67089	Prdx6,Cox4i1,Cox5a,Cox6a1,Cox6c,Cox8a,Cyba,Cybb,Hmox1,Psmb8,Ncf4,Ncoa1,Sqstm1,P4hb,Psmb4,Cox7a2l,Txn1,Uba52,Ubb,Psma6,Txnrd2,Prdx5,Txn2,Carm1,Psmc6	25/155
10_Member	Reactome Gene Sets	R-MMU-2262752	Cellular responses to stress	-5.88895	-3.40578	11758,12857,12858,12861,12864,12868,13057,13058,14229,15185,15368,15511,16913,17164,17535,17684,17972,17977,18412,18415,18453,19172,20463,22145,22166,22186,22187,23872,26408,26443,26462,29806,50932,54170,54563,54683,56551,59008,59035,66144,67089,68441,83409,102626,112406,665113	Prdx6,Cox4i1,Cox5a,Cox6a1,Cox6c,Cox8a,Cyba,Cybb,Fkbp5,Hdac6,Hmox1,Hspa1b,Psmb8,Mapkapk2,Mre11a,Cited2,Ncf4,Ncoa1,Sqstm1,Hspa4l,P4hb,Psmb4,Cox7a2l,Tuba4a,Txn1,Uba52,Ubb,Ets2,Map3k5,Psma6,Txnrd2,Limd1,Mink1,Rragc,Nup210,Prdx5,Txn2,Anapc5,Carm1,Atp6v1f,Psmc6,Rraga,Lamtor2,Mapkapk3,Egln2,Tnik	46/501
10_Member	Reactome Gene Sets	R-MMU-8953897	Cellular responses to stimuli	-5.84144	-3.3672	11758,12857,12858,12861,12864,12868,13057,13058,14229,15185,15368,15511,16913,17164,17535,17684,17972,17977,18412,18415,18453,19172,20463,22145,22166,22186,22187,23872,26408,26443,26462,29806,50932,54170,54563,54683,56551,59008,59035,66144,67089,68441,83409,102626,112406,665113	Prdx6,Cox4i1,Cox5a,Cox6a1,Cox6c,Cox8a,Cyba,Cybb,Fkbp5,Hdac6,Hmox1,Hspa1b,Psmb8,Mapkapk2,Mre11a,Cited2,Ncf4,Ncoa1,Sqstm1,Hspa4l,P4hb,Psmb4,Cox7a2l,Tuba4a,Txn1,Uba52,Ubb,Ets2,Map3k5,Psma6,Txnrd2,Limd1,Mink1,Rragc,Nup210,Prdx5,Txn2,Anapc5,Carm1,Atp6v1f,Psmc6,Rraga,Lamtor2,Mapkapk3,Egln2,Tnik	46/503
11_Member	GO Biological Processes	GO:0032103	positive regulation of response to external stimulus	-7.84839	-5.09397	11820,12266,12267,12273,12768,13032,13057,14173,14251,14456,14747,16149,16176,16362,16534,16803,17164,18003,18035,18081,18413,18438,19219,19229,19419,20085,20202,20306,21825,21897,21934,24088,27226,54123,56174,56620,56644,57266,57783,58217,66725,71481,71609,76438,80859,80861,100952,102626,170744,192176,193385,217069,227541,246707,268973,381308,434341	App,C3,C3ar1,C5ar1,Ccr1,Ctsc,Cyba,Fgf2,Flot1,Gas6,Cmklr1,Cd74,Il1b,Irf1,Kcnn4,Lbp,Mapkapk2,Nedd9,Nfkbia,Ninj1,Osm,P2rx4,Ptger4,Ptk2b,Rasgrp1,Rps19,S100a9,Ccl7,Thbs1,Tlr1,Tnfrsf11a,Tlr2,Pla2g7,Irf7,Nagk,Clec4n,Clec7a,Cxcl14,Tnip1,Trem1,Lrrk2,Alpk1,Tradd,Rftn1,Nfkbiz,Dhx58,Emilin1,Mapkapk3,Tlr8,Flna,Ripor2,Trim25,Camk1d,Emilin2,Nlrc4,Ifi211,Nlrc5	57/593
11_Member	GO Biological Processes	GO:0031349	positive regulation of defense response	-4.93629	-2.59053	11820,12266,13032,13057,14251,16149,16176,16362,16534,16803,17164,18035,18081,18413,19219,19419,20085,20202,21897,21934,24088,54123,56174,56620,56644,57783,66725,71481,71609,76438,80859,80861,100952,102626,170744,217069,246707,268973,381308,434341	App,C3,Ctsc,Cyba,Flot1,Cd74,Il1b,Irf1,Kcnn4,Lbp,Mapkapk2,Nfkbia,Ninj1,Osm,Ptger4,Rasgrp1,Rps19,S100a9,Tlr1,Tnfrsf11a,Tlr2,Irf7,Nagk,Clec4n,Clec7a,Tnip1,Lrrk2,Alpk1,Tradd,Rftn1,Nfkbiz,Dhx58,Emilin1,Mapkapk3,Tlr8,Trim25,Emilin2,Nlrc4,Ifi211,Nlrc5	40/447
11_Member	GO Biological Processes	GO:0050778	positive regulation of immune response	-4.33211	-2.08868	12259,12266,12267,12273,12504,13057,14251,14284,14747,15216,15284,16149,16176,16177,16190,16362,16534,16803,17164,18035,18081,18173,18578,18636,19419,20085,21897,22040,22433,24088,50723,54123,56174,56620,56644,56743,57783,68119,69583,71481,76438,80859,80861,102626,170744,214855,217069,226422,232811,246177,268973,381308,434341	C1qa,C3,C3ar1,C5ar1,Cd4,Cyba,Flot1,Fosl2,Cmklr1,Hfe,Hlx,Cd74,Il1b,Il1r1,Il4ra,Irf1,Kcnn4,Lbp,Mapkapk2,Nfkbia,Ninj1,Slc11a1,Pde4b,Cfp,Rasgrp1,Rps19,Tlr1,Trex1,Xbp1,Tlr2,Icosl,Irf7,Nagk,Clec4n,Clec7a,Lat2,Tnip1,Cmtm3,Tnfsf13,Alpk1,Rftn1,Nfkbiz,Dhx58,Mapkapk3,Tlr8,Arid5a,Trim25,Rab29,Kmt5c,Myo1g,Nlrc4,Ifi211,Nlrc5	53/696
11_Member	GO Biological Processes	GO:0045087	innate immune response	-4.29423	-2.08045	11820,12259,12265,12266,12523,12642,13057,13058,14284,15975,16149,16362,16803,17533,17913,17999,18106,18173,18636,18712,20202,21897,22040,22121,23845,24088,26362,26408,27361,52055,54123,56174,56275,56417,56620,56644,58217,66102,69834,71481,71538,74136,74244,80861,108037,109032,170744,208727,214855,217069,217203,217370,226421,227753,268973,434341	App,C1qa,Ciita,C3,Cd84,Ch25h,Cyba,Cybb,Fosl2,Ifnar1,Cd74,Irf1,Lbp,Mrc1,Myo1c,Nedd4,Cd244a,Slc11a1,Cfp,Pim1,S100a9,Tlr1,Trex1,Rpl13a,Clec5a,Tlr2,Axl,Map3k5,Msrb1,Rab11fip5,Irf7,Nagk,Rbm14,Adar,Clec4n,Clec7a,Trem1,Cxcl16,Rab43,Alpk1,Fbxo9,Sec14l1,Atg7,Dhx58,Shmt2,Sp110,Tlr8,Hdac4,Arid5a,Trim25,Tmem106a,Cybc1,Rab7b,Gsn,Nlrc4,Nlrc5	56/751
11_Member	GO Biological Processes	GO:0002831	regulation of response to biotic stimulus	-4.26914	-2.06647	11820,12523,12768,13057,14251,16149,16176,16362,16803,17164,18035,18081,18412,18712,19419,20085,20202,20737,21897,22040,24088,54123,56174,56275,56417,56620,56644,57783,67526,71481,73914,74136,76438,80859,80861,100952,102626,170744,217069,226421,231712,246707,268973,381308,434341	App,Cd84,Ccr1,Cyba,Flot1,Cd74,Il1b,Irf1,Lbp,Mapkapk2,Nfkbia,Ninj1,Sqstm1,Pim1,Rasgrp1,Rps19,S100a9,Spn,Tlr1,Trex1,Tlr2,Irf7,Nagk,Rbm14,Adar,Clec4n,Clec7a,Tnip1,Atg12,Alpk1,Irak3,Sec14l1,Rftn1,Nfkbiz,Dhx58,Emilin1,Mapkapk3,Tlr8,Trim25,Rab7b,Trafd1,Emilin2,Nlrc4,Ifi211,Nlrc5	45/562
11_Member	GO Biological Processes	GO:0045088	regulation of innate immune response	-4.22388	-2.04581	11820,12768,13057,14251,16149,16362,16803,17164,18035,18081,18412,18712,19419,20085,20202,21897,22040,24088,54123,56174,56417,56620,56644,57783,67526,71481,73914,74136,76438,80859,80861,102626,170744,217069,226421,231712,268973,381308,434341	App,Ccr1,Cyba,Flot1,Cd74,Irf1,Lbp,Mapkapk2,Nfkbia,Ninj1,Sqstm1,Pim1,Rasgrp1,Rps19,S100a9,Tlr1,Trex1,Tlr2,Irf7,Nagk,Adar,Clec4n,Clec7a,Tnip1,Atg12,Alpk1,Irak3,Sec14l1,Rftn1,Nfkbiz,Dhx58,Mapkapk3,Tlr8,Trim25,Rab7b,Trafd1,Nlrc4,Ifi211,Nlrc5	39/464
11_Member	GO Biological Processes	GO:0002758	innate immune response-activating signaling pathway	-4.01997	-1.89474	16362,16803,17164,18035,21897,24088,54123,56620,56644,57783,71481,76438,80859,80861,102626,170744,217069	Irf1,Lbp,Mapkapk2,Nfkbia,Tlr1,Tlr2,Irf7,Clec4n,Clec7a,Tnip1,Alpk1,Rftn1,Nfkbiz,Dhx58,Mapkapk3,Tlr8,Trim25	17/138
11_Member	GO Biological Processes	GO:0002221	pattern recognition receptor signaling pathway	-3.93444	-1.82716	16362,16803,17164,18035,21897,24088,54123,56644,57783,71481,76438,80859,80861,102626,170744,217069	Irf1,Lbp,Mapkapk2,Nfkbia,Tlr1,Tlr2,Irf7,Clec7a,Tnip1,Alpk1,Rftn1,Nfkbiz,Dhx58,Mapkapk3,Tlr8,Trim25	16/127
11_Member	GO Biological Processes	GO:0002833	positive regulation of response to biotic stimulus	-3.54866	-1.57333	13057,14251,16149,16362,16803,17164,18035,18081,19419,20085,21897,24088,54123,56174,56620,56644,57783,71481,76438,80859,80861,100952,102626,170744,217069,246707,268973,381308,434341	Cyba,Flot1,Cd74,Irf1,Lbp,Mapkapk2,Nfkbia,Ninj1,Rasgrp1,Rps19,Tlr1,Tlr2,Irf7,Nagk,Clec4n,Clec7a,Tnip1,Alpk1,Rftn1,Nfkbiz,Dhx58,Emilin1,Mapkapk3,Tlr8,Trim25,Emilin2,Nlrc4,Ifi211,Nlrc5	29/333
11_Member	GO Biological Processes	GO:0002218	activation of innate immune response	-3.52393	-1.57313	16362,16803,17164,18035,21897,24088,54123,56620,56644,57783,71481,76438,80859,80861,102626,170744,217069,268973,381308	Irf1,Lbp,Mapkapk2,Nfkbia,Tlr1,Tlr2,Irf7,Clec4n,Clec7a,Tnip1,Alpk1,Rftn1,Nfkbiz,Dhx58,Mapkapk3,Tlr8,Trim25,Nlrc4,Ifi211	19/180
11_Member	GO Biological Processes	GO:0002757	immune response-activating signaling pathway	-3.50504	-1.56769	12266,12267,12273,14284,14747,16362,16803,17164,18035,18578,21897,24088,50723,54123,56620,56644,56743,57783,71481,76438,80859,80861,102626,170744,217069,246177	C3,C3ar1,C5ar1,Fosl2,Cmklr1,Irf1,Lbp,Mapkapk2,Nfkbia,Pde4b,Tlr1,Tlr2,Icosl,Irf7,Clec4n,Clec7a,Lat2,Tnip1,Alpk1,Rftn1,Nfkbiz,Dhx58,Mapkapk3,Tlr8,Trim25,Myo1g	26/287
11_Member	GO Biological Processes	GO:0045089	positive regulation of innate immune response	-3.45681	-1.54359	13057,14251,16149,16362,16803,17164,18035,18081,19419,20085,21897,24088,54123,56174,56620,56644,57783,71481,76438,80859,80861,102626,170744,217069,268973,381308,434341	Cyba,Flot1,Cd74,Irf1,Lbp,Mapkapk2,Nfkbia,Ninj1,Rasgrp1,Rps19,Tlr1,Tlr2,Irf7,Nagk,Clec4n,Clec7a,Tnip1,Alpk1,Rftn1,Nfkbiz,Dhx58,Mapkapk3,Tlr8,Trim25,Nlrc4,Ifi211,Nlrc5	27/305
11_Member	GO Biological Processes	GO:0002764	immune response-regulating signaling pathway	-3.25995	-1.41368	12266,12267,12273,13036,14284,14747,16362,16803,17164,18035,18578,21897,24088,50723,54123,56620,56644,56743,57783,71481,76438,80859,80861,102626,170744,217069,246177	C3,C3ar1,C5ar1,Ctsh,Fosl2,Cmklr1,Irf1,Lbp,Mapkapk2,Nfkbia,Pde4b,Tlr1,Tlr2,Icosl,Irf7,Clec4n,Clec7a,Lat2,Tnip1,Alpk1,Rftn1,Nfkbiz,Dhx58,Mapkapk3,Tlr8,Trim25,Myo1g	27/314
11_Member	GO Biological Processes	GO:0002253	activation of immune response	-3.24217	-1.39924	12259,12266,12267,12273,14284,14747,16362,16803,17164,18035,18578,18636,21897,22040,24088,50723,54123,56620,56644,56743,57783,71481,76438,80859,80861,102626,170744,217069,246177,268973,381308	C1qa,C3,C3ar1,C5ar1,Fosl2,Cmklr1,Irf1,Lbp,Mapkapk2,Nfkbia,Pde4b,Cfp,Tlr1,Trex1,Tlr2,Icosl,Irf7,Clec4n,Clec7a,Lat2,Tnip1,Alpk1,Rftn1,Nfkbiz,Dhx58,Mapkapk3,Tlr8,Trim25,Myo1g,Nlrc4,Ifi211	31/381
11_Member	GO Biological Processes	GO:0030522	intracellular receptor signaling pathway	-2.92624	-1.20825	16362,17977,17999,18035,18600,18712,19411,54123,59035,71481,76438,80861,170744,170826,217069,224829	Irf1,Ncoa1,Nedd4,Nfkbia,Padi2,Pim1,Rarg,Irf7,Carm1,Alpk1,Rftn1,Dhx58,Tlr8,Ppargc1b,Trim25,Trerf1	16/156
11_Member	GO Biological Processes	GO:0062207	regulation of pattern recognition receptor signaling pathway	-2.64577	-1.03163	11820,13057,14251,16362,16803,18081,18412,20202,21897,22040,54123,56174,73914,74136,80861,226421	App,Cyba,Flot1,Irf1,Lbp,Ninj1,Sqstm1,S100a9,Tlr1,Trex1,Irf7,Nagk,Irak3,Sec14l1,Dhx58,Rab7b	16/166
12_Member	GO Biological Processes	GO:0043068	positive regulation of programmed cell death	-7.16492	-4.44941	11747,11783,11820,12048,12053,12257,12333,12385,13032,13036,13555,14089,14694,15368,15446,16176,16362,16403,17691,17869,17977,18128,18413,19252,19400,19411,20202,21664,21825,22187,22433,23882,26408,50883,53415,56177,56484,56644,56772,58217,59035,66437,66725,67184,68428,68867,71361,71609,74244,107392,107449,109032,194655,208727,227541,227753,229595,231872,246707,268973	Anxa5,Apaf1,App,Bcl2l1,Bcl6,Tspo,Capn1,Ctnna1,Ctsc,Ctsh,E2f1,Fap,Rack1,Hmox1,Hpgd,Il1b,Irf1,Itga6,Sik1,Myc,Ncoa1,Notch1,Osm,Dusp1,Rapsn,Rarg,S100a9,Phlda1,Thbs1,Ubb,Xbp1,Gadd45g,Map3k5,Chek2,Htatip2,Olfm1,Foxo3,Clec7a,Mllt11,Trem1,Carm1,Fis1,Lrrk2,Ndufa13,Steap3,Rnf122,Aifm2,Tradd,Atg7,Brms1,Unc5b,Sp110,Klf11,Hdac4,Camk1d,Gsn,Adamtsl4,Aimp2,Emilin2,Nlrc4	60/668
12_Member	GO Biological Processes	GO:0043065	positive regulation of apoptotic process	-6.48962	-3.89281	11747,11783,11820,12048,12053,12257,12333,12385,13032,13036,13555,14089,14694,15368,15446,16176,16362,16403,17691,17869,17977,18128,18413,19252,19400,19411,20202,21664,21825,22187,22433,23882,26408,50883,56177,56484,56772,58217,59035,66437,67184,68428,68867,71361,71609,74244,107392,107449,109032,194655,208727,227541,227753,229595,231872,246707,268973	Anxa5,Apaf1,App,Bcl2l1,Bcl6,Tspo,Capn1,Ctnna1,Ctsc,Ctsh,E2f1,Fap,Rack1,Hmox1,Hpgd,Il1b,Irf1,Itga6,Sik1,Myc,Ncoa1,Notch1,Osm,Dusp1,Rapsn,Rarg,S100a9,Phlda1,Thbs1,Ubb,Xbp1,Gadd45g,Map3k5,Chek2,Olfm1,Foxo3,Mllt11,Trem1,Carm1,Fis1,Ndufa13,Steap3,Rnf122,Aifm2,Tradd,Atg7,Brms1,Unc5b,Sp110,Klf11,Hdac4,Camk1d,Gsn,Adamtsl4,Aimp2,Emilin2,Nlrc4	57/650
12_Member	GO Biological Processes	GO:0097190	apoptotic signaling pathway	-2.91589	-1.20188	11669,11749,11783,11937,12048,12051,12385,12925,13132,13555,15368,16176,17869,18438,20737,21944,22433,26408,50883,56484,56772,66437,67184,71609,80859,215114,414801	Aldh2,Anxa6,Apaf1,Atp2a1,Bcl2l1,Bcl3,Ctnna1,Crip1,Dab2,E2f1,Hmox1,Il1b,Myc,P2rx4,Spn,Tnfsf12,Xbp1,Map3k5,Chek2,Foxo3,Mllt11,Fis1,Ndufa13,Tradd,Nfkbiz,Hip1,Itprip	27/331
13_Member	KEGG Pathway	mmu04142	Lysosome - Mus musculus (house mouse)	-7.12142	-4.41815	11305,11764,11766,12512,12752,13030,13032,13034,13036,13423,14667,16541,17159,17939,18173,19025,19156,27029,54397,64138,110006,211329	Abca2,Ap1b1,Ap1g2,Cd63,Cln3,Ctsb,Ctsc,Ctse,Ctsh,Dnase2a,Gm2a,Napsa,Man2b1,Naga,Slc11a1,Ctsa,Psap,Sgsh,Ppt2,Ctsz,Gusb,Ncoa7	22/135
14_Member	GO Biological Processes	GO:0010876	lipid localization	-6.98891	-4.3104	11305,11307,11425,11520,11812,11813,12257,12752,14421,14667,14719,16176,16534,16803,18391,18605,18739,18782,18830,19156,20533,20652,22228,23943,26874,27376,56356,56520,66905,69076,71720,75750,75909,100017,231287,233979,235283,241633,320528,320951,329015	Abca2,Abcg1,Apoc4,Plin2,Apoc1,Apoc2,Tspo,Cln3,B4galnt1,Gm2a,Got2,Il1b,Kcnn4,Lbp,Sigmar1,Enpp1,Pitpnm1,Pla2g2d,Pltp,Psap,Slc4a1,Soat1,Ucp2,Esyt1,Abcd2,Slc25a10,Gltp,Nme4,Plin3,Triap1,Osbpl3,Slc10a6,Vmp1,Ldlrap1,Atp10d,Tpcn2,Gramd1b,Atp8b4,Vps13c,Pisd,Atg2a	41/385
14_Member	GO Biological Processes	GO:0006869	lipid transport	-6.03205	-3.52067	11305,11307,11425,11520,11812,11813,12257,12752,14667,14719,16534,16803,18391,18739,18782,18830,19156,20533,20652,22228,23943,26874,27376,56356,56520,69076,71720,75750,75909,100017,231287,233979,235283,241633,320528,329015	Abca2,Abcg1,Apoc4,Plin2,Apoc1,Apoc2,Tspo,Cln3,Gm2a,Got2,Kcnn4,Lbp,Sigmar1,Pitpnm1,Pla2g2d,Pltp,Psap,Slc4a1,Soat1,Ucp2,Esyt1,Abcd2,Slc25a10,Gltp,Nme4,Triap1,Osbpl3,Slc10a6,Vmp1,Ldlrap1,Atp10d,Tpcn2,Gramd1b,Atp8b4,Vps13c,Atg2a	36/344
15_Member	GO Biological Processes	GO:0045862	positive regulation of proteolysis	-6.58021	-3.95411	11502,11783,11820,11983,12048,12335,12398,12795,13032,13036,13132,14066,14694,15511,16176,17387,17869,18570,19229,20202,21854,22393,22436,26408,27059,56644,64209,66437,66725,67269,74244,76524,76884,208117,215114,216157,227753,268973	Adam9,Apaf1,App,Atp5if1,Bcl2l1,Capn3,Cbfa2t3,Plk3,Ctsc,Ctsh,Dab2,F3,Rack1,Hspa1b,Il1b,Mmp14,Myc,Pdcd6,Ptk2b,S100a9,Timm17a,Wfs1,Xdh,Map3k5,Sh3d19,Clec7a,Herpud1,Fis1,Lrrk2,Agtpbp1,Atg7,Cln6,Cyfip2,Aph1b,Hip1,Tmem259,Gsn,Nlrc4	38/355
15_Member	GO Biological Processes	GO:0030162	regulation of proteolysis	-6.29932	-3.75575	11502,11783,11820,11983,12048,12335,12380,12398,12550,12752,12795,13014,13032,13036,13132,13650,14066,14456,14694,15185,15216,15511,16176,16913,17035,17387,17869,18570,18793,19229,20202,20317,20725,21825,21854,22187,22393,22436,26408,27059,56644,64138,64209,65019,66437,66725,67269,68135,69076,74244,74772,75744,76524,76884,94232,171580,208117,215114,216157,217344,227753,268973	Adam9,Apaf1,App,Atp5if1,Bcl2l1,Capn3,Cast,Cbfa2t3,Cdh1,Cln3,Plk3,Cstb,Ctsc,Ctsh,Dab2,Rhbdf1,F3,Gas6,Rack1,Hdac6,Hfe,Hspa1b,Il1b,Psmb8,Lxn,Mmp14,Myc,Pdcd6,Plaur,Ptk2b,S100a9,Serpinf1,Serpinb8,Thbs1,Timm17a,Ubb,Wfs1,Xdh,Map3k5,Sh3d19,Clec7a,Ctsz,Herpud1,Rpl23,Fis1,Lrrk2,Agtpbp1,Eif3h,Triap1,Atg7,Atp13a2,Svip,Cln6,Cyfip2,Ubqln4,Mical1,Aph1b,Hip1,Tmem259,Rhbdf2,Gsn,Nlrc4	62/741
15_Member	GO Biological Processes	GO:2000116	regulation of cysteine-type endopeptidase activity	-4.25924	-2.06384	11783,12048,12380,12550,14066,14456,14694,15511,17869,18570,18793,20202,21825,22436,26408,56644,66437,69076,76884,171580,215114,227753,268973	Apaf1,Bcl2l1,Cast,Cdh1,F3,Gas6,Rack1,Hspa1b,Myc,Pdcd6,Plaur,S100a9,Thbs1,Xdh,Map3k5,Clec7a,Fis1,Triap1,Cyfip2,Mical1,Hip1,Gsn,Nlrc4	23/214
15_Member	GO Biological Processes	GO:0043281	regulation of cysteine-type endopeptidase activity involved in apoptotic process	-4.01877	-1.89474	11783,12048,12550,14066,14456,14694,15511,17869,18570,18793,20202,21825,22436,26408,56644,66437,69076,171580,215114,227753,268973	Apaf1,Bcl2l1,Cdh1,F3,Gas6,Rack1,Hspa1b,Myc,Pdcd6,Plaur,S100a9,Thbs1,Xdh,Map3k5,Clec7a,Fis1,Triap1,Mical1,Hip1,Gsn,Nlrc4	21/193
15_Member	GO Biological Processes	GO:0052548	regulation of endopeptidase activity	-3.65898	-1.65709	11783,12048,12380,12550,14066,14456,14694,15511,16913,17869,18570,18793,20202,20317,20725,21825,22436,26408,56644,66437,69076,74772,76884,171580,208117,215114,217344,227753,268973	Apaf1,Bcl2l1,Cast,Cdh1,F3,Gas6,Rack1,Hspa1b,Psmb8,Myc,Pdcd6,Plaur,S100a9,Serpinf1,Serpinb8,Thbs1,Xdh,Map3k5,Clec7a,Fis1,Triap1,Atp13a2,Cyfip2,Mical1,Aph1b,Hip1,Rhbdf2,Gsn,Nlrc4	29/328
15_Member	GO Biological Processes	GO:0052547	regulation of peptidase activity	-3.02633	-1.26896	11783,11820,12048,12380,12550,13014,13036,14066,14456,14694,15511,16913,17035,17869,18570,18793,20202,20317,20725,21825,22436,26408,56644,66437,69076,74772,76884,171580,208117,215114,217344,227753,268973	Apaf1,App,Bcl2l1,Cast,Cdh1,Cstb,Ctsh,F3,Gas6,Rack1,Hspa1b,Psmb8,Lxn,Myc,Pdcd6,Plaur,S100a9,Serpinf1,Serpinb8,Thbs1,Xdh,Map3k5,Clec7a,Fis1,Triap1,Atp13a2,Cyfip2,Mical1,Aph1b,Hip1,Rhbdf2,Gsn,Nlrc4	33/427
15_Member	GO Biological Processes	GO:2001056	positive regulation of cysteine-type endopeptidase activity	-3.0024	-1.25337	11783,12048,14066,14694,17869,18570,20202,22436,26408,56644,66437,76884,215114,227753,268973	Apaf1,Bcl2l1,F3,Rack1,Myc,Pdcd6,S100a9,Xdh,Map3k5,Clec7a,Fis1,Cyfip2,Hip1,Gsn,Nlrc4	15/139
15_Member	GO Biological Processes	GO:0043280	positive regulation of cysteine-type endopeptidase activity involved in apoptotic process	-2.96298	-1.2334	11783,12048,14066,14694,17869,18570,20202,22436,26408,56644,66437,215114,227753,268973	Apaf1,Bcl2l1,F3,Rack1,Myc,Pdcd6,S100a9,Xdh,Map3k5,Clec7a,Fis1,Hip1,Gsn,Nlrc4	14/126
15_Member	GO Biological Processes	GO:0010950	positive regulation of endopeptidase activity	-2.86778	-1.1717	11783,12048,14066,14694,17869,18570,20202,22436,26408,56644,66437,76884,208117,215114,227753,268973	Apaf1,Bcl2l1,F3,Rack1,Myc,Pdcd6,S100a9,Xdh,Map3k5,Clec7a,Fis1,Cyfip2,Aph1b,Hip1,Gsn,Nlrc4	16/158
15_Member	GO Biological Processes	GO:0010952	positive regulation of peptidase activity	-2.63055	-1.021	11783,12048,13036,14066,14694,17869,18570,20202,22436,26408,56644,66437,76884,208117,215114,227753,268973	Apaf1,Bcl2l1,Ctsh,F3,Rack1,Myc,Pdcd6,S100a9,Xdh,Map3k5,Clec7a,Fis1,Cyfip2,Aph1b,Hip1,Gsn,Nlrc4	17/182
15_Member	GO Biological Processes	GO:0006919	activation of cysteine-type endopeptidase activity involved in apoptotic process	-2.44852	-0.904951	11783,12048,14066,14694,17869,18570,20202,22436,215114,268973	Apaf1,Bcl2l1,F3,Rack1,Myc,Pdcd6,S100a9,Xdh,Hip1,Nlrc4	10/85
16_Member	GO Biological Processes	GO:0002521	leukocyte differentiation	-6.49548	-3.89281	11820,12051,12053,12393,12398,12504,12522,14104,14284,14369,15284,15902,16149,16190,16362,17095,17684,18605,18782,19156,19219,19229,19664,20442,20535,20737,21934,21985,22228,22724,22780,23882,24088,26362,28240,50932,54125,57259,65963,74775,75766,79221,80752,80859,98365,107817,381319	App,Bcl3,Bcl6,Runx2,Cbfa2t3,Cd4,Cd83,Fasn,Fosl2,Fzd7,Hlx,Id2,Cd74,Il4ra,Irf1,Lyl1,Cited2,Enpp1,Pla2g2d,Psap,Ptger4,Ptk2b,Rbpj,St3gal1,Slc4a2,Spn,Tnfrsf11a,Tpd52,Ucp2,Zbtb7b,Ikzf3,Gadd45g,Tlr2,Axl,Trpm2,Mink1,Polm,Tob2,Tmem176b,Lmbr1l,Dcstamp,Hdac9,Fam20c,Nfkbiz,Slamf9,Jmjd6,Batf3	47/492
16_Member	GO Biological Processes	GO:0045321	leukocyte activation	-6.41011	-3.84073	11502,11820,11988,12051,12053,12259,12273,12393,12504,12522,12523,14130,14284,14369,15284,15902,15975,16149,16190,16362,16408,16803,17095,17869,17999,18106,18173,18605,18782,19156,19219,19229,19419,19664,20442,20737,21897,21985,22040,22724,22780,23882,24088,26362,50723,50932,54125,56644,56715,56743,74775,75766,79221,80859,98365,107817,217203,226422,237256,380732,381319	Adam9,App,Slc7a2,Bcl3,Bcl6,C1qa,C5ar1,Runx2,Cd4,Cd83,Cd84,Fcgr2b,Fosl2,Fzd7,Hlx,Id2,Ifnar1,Cd74,Il4ra,Irf1,Itgal,Lbp,Lyl1,Myc,Nedd4,Cd244a,Slc11a1,Enpp1,Pla2g2d,Psap,Ptger4,Ptk2b,Rasgrp1,Rbpj,St3gal1,Spn,Tlr1,Tpd52,Trex1,Zbtb7b,Ikzf3,Gadd45g,Tlr2,Axl,Icosl,Mink1,Polm,Clec7a,Rabgef1,Lat2,Lmbr1l,Dcstamp,Hdac9,Nfkbiz,Slamf9,Jmjd6,Tmem106a,Rab29,Zc3h12d,Milr1,Batf3	61/719
16_Member	GO Biological Processes	GO:1903131	mononuclear cell differentiation	-6.01119	-3.5075	11820,12051,12053,12393,12504,12522,14104,14284,14369,15284,15902,16149,16190,16362,17095,18605,18782,19156,19219,19229,19664,20442,20737,21985,22228,22724,22780,23882,24088,26362,28240,50932,54125,65963,74775,75766,79221,80859,98365,107817,381319	App,Bcl3,Bcl6,Runx2,Cd4,Cd83,Fasn,Fosl2,Fzd7,Hlx,Id2,Cd74,Il4ra,Irf1,Lyl1,Enpp1,Pla2g2d,Psap,Ptger4,Ptk2b,Rbpj,St3gal1,Spn,Tpd52,Ucp2,Zbtb7b,Ikzf3,Gadd45g,Tlr2,Axl,Trpm2,Mink1,Polm,Tmem176b,Lmbr1l,Dcstamp,Hdac9,Nfkbiz,Slamf9,Jmjd6,Batf3	41/419
16_Member	GO Biological Processes	GO:0046632	alpha-beta T cell differentiation	-4.30885	-2.08671	12051,12053,12522,14284,15284,16190,16362,18782,19156,19219,20737,22724,23882,80859	Bcl3,Bcl6,Cd83,Fosl2,Hlx,Il4ra,Irf1,Pla2g2d,Psap,Ptger4,Spn,Zbtb7b,Gadd45g,Nfkbiz	14/94
16_Member	GO Biological Processes	GO:0030098	lymphocyte differentiation	-4.29697	-2.08045	12051,12053,12393,12504,12522,14284,14369,15284,15902,16149,16190,16362,17095,18605,18782,19156,19219,19229,19664,20442,20737,21985,22724,22780,23882,26362,50932,54125,74775,79221,80859,107817	Bcl3,Bcl6,Runx2,Cd4,Cd83,Fosl2,Fzd7,Hlx,Id2,Cd74,Il4ra,Irf1,Lyl1,Enpp1,Pla2g2d,Psap,Ptger4,Ptk2b,Rbpj,St3gal1,Spn,Tpd52,Zbtb7b,Ikzf3,Gadd45g,Axl,Mink1,Polm,Lmbr1l,Hdac9,Nfkbiz,Jmjd6	32/348
16_Member	GO Biological Processes	GO:0046649	lymphocyte activation	-4.28694	-2.08045	12051,12053,12393,12504,12522,12523,14130,14284,14369,15284,15902,15975,16149,16190,16362,16408,17095,17869,17999,18106,18173,18605,18782,19156,19219,19229,19419,19664,20442,20737,21985,22724,22780,23882,26362,50723,50932,54125,56743,74775,79221,80859,98365,107817,226422,237256	Bcl3,Bcl6,Runx2,Cd4,Cd83,Cd84,Fcgr2b,Fosl2,Fzd7,Hlx,Id2,Ifnar1,Cd74,Il4ra,Irf1,Itgal,Lyl1,Myc,Nedd4,Cd244a,Slc11a1,Enpp1,Pla2g2d,Psap,Ptger4,Ptk2b,Rasgrp1,Rbpj,St3gal1,Spn,Tpd52,Zbtb7b,Ikzf3,Gadd45g,Axl,Icosl,Mink1,Polm,Lat2,Lmbr1l,Hdac9,Nfkbiz,Slamf9,Jmjd6,Rab29,Zc3h12d	46/578
16_Member	GO Biological Processes	GO:0030217	T cell differentiation	-4.19657	-2.02691	12051,12053,12393,12504,12522,14284,14369,15284,16149,16190,16362,18605,18782,19156,19219,20737,22724,22780,23882,50932,74775,80859,107817	Bcl3,Bcl6,Runx2,Cd4,Cd83,Fosl2,Fzd7,Hlx,Cd74,Il4ra,Irf1,Enpp1,Pla2g2d,Psap,Ptger4,Spn,Zbtb7b,Ikzf3,Gadd45g,Mink1,Lmbr1l,Nfkbiz,Jmjd6	23/216
16_Member	GO Biological Processes	GO:0002263	cell activation involved in immune response	-4.15158	-1.98892	11820,12051,12053,15284,16149,16190,16408,16803,18106,18173,18605,19219,19229,19419,20442,20737,22040,23882,50723,56644,56715,56743,80859,380732	App,Bcl3,Bcl6,Hlx,Cd74,Il4ra,Itgal,Lbp,Cd244a,Slc11a1,Enpp1,Ptger4,Ptk2b,Rasgrp1,St3gal1,Spn,Trex1,Gadd45g,Icosl,Clec7a,Rabgef1,Lat2,Nfkbiz,Milr1	24/232
16_Member	GO Biological Processes	GO:0042088	T-helper 1 type immune response	-4.06062	-1.92162	12051,15284,16068,16190,20737,23882,80859	Bcl3,Hlx,Il18bp,Il4ra,Spn,Gadd45g,Nfkbiz	7/26
16_Member	GO Biological Processes	GO:0042110	T cell activation	-3.93617	-1.82716	12051,12053,12393,12504,12522,12523,14284,14369,15284,15975,16149,16190,16362,16408,17869,17999,18173,18605,18782,19156,19219,19419,20737,22724,22780,23882,50723,50932,74775,80859,98365,107817,226422,237256	Bcl3,Bcl6,Runx2,Cd4,Cd83,Cd84,Fosl2,Fzd7,Hlx,Ifnar1,Cd74,Il4ra,Irf1,Itgal,Myc,Nedd4,Slc11a1,Enpp1,Pla2g2d,Psap,Ptger4,Rasgrp1,Spn,Zbtb7b,Ikzf3,Gadd45g,Icosl,Mink1,Lmbr1l,Nfkbiz,Slamf9,Jmjd6,Rab29,Zc3h12d	34/396
16_Member	GO Biological Processes	GO:0002366	leukocyte activation involved in immune response	-3.83978	-1.75978	12051,12053,15284,16149,16190,16408,16803,18106,18173,18605,19219,19229,19419,20442,20737,22040,23882,50723,56644,56715,56743,80859,380732	Bcl3,Bcl6,Hlx,Cd74,Il4ra,Itgal,Lbp,Cd244a,Slc11a1,Enpp1,Ptger4,Ptk2b,Rasgrp1,St3gal1,Spn,Trex1,Gadd45g,Icosl,Clec7a,Rabgef1,Lat2,Nfkbiz,Milr1	23/228
16_Member	GO Biological Processes	GO:0046631	alpha-beta T cell activation	-3.56857	-1.59003	12051,12053,12522,14284,15284,16190,16362,17869,18782,19156,19219,20737,22724,23882,80859	Bcl3,Bcl6,Cd83,Fosl2,Hlx,Il4ra,Irf1,Myc,Pla2g2d,Psap,Ptger4,Spn,Zbtb7b,Gadd45g,Nfkbiz	15/123
16_Member	GO Biological Processes	GO:0043367	CD4-positive, alpha-beta T cell differentiation	-3.52632	-1.57313	12051,12053,12522,15284,16190,18782,19219,20737,23882,80859	Bcl3,Bcl6,Cd83,Hlx,Il4ra,Pla2g2d,Ptger4,Spn,Gadd45g,Nfkbiz	10/62
16_Member	GO Biological Processes	GO:0002250	adaptive immune response	-3.47638	-1.54608	11658,12051,12053,12259,12266,12267,12504,12523,13032,13036,14130,14284,15284,16068,16149,16190,16449,17999,18106,18128,18173,18605,19229,20737,21934,22040,23882,50723,54123,56620,56743,57914,58217,69583,76438,80859,98682,246177	Alcam,Bcl3,Bcl6,C1qa,C3,C3ar1,Cd4,Cd84,Ctsc,Ctsh,Fcgr2b,Fosl2,Hlx,Il18bp,Cd74,Il4ra,Jag1,Nedd4,Cd244a,Notch1,Slc11a1,Enpp1,Ptk2b,Spn,Tnfrsf11a,Trex1,Gadd45g,Icosl,Irf7,Clec4n,Lat2,Crlf2,Trem1,Tnfsf13,Rftn1,Nfkbiz,Mfsd6,Myo1g	38/487
16_Member	GO Biological Processes	GO:0002252	immune effector process	-3.42568	-1.52595	11820,12051,12053,12259,12266,13032,13036,14130,14284,15284,16149,16190,16408,16449,16803,18106,18173,18605,18636,18810,19219,19229,19419,20442,20737,22040,23882,50723,54123,56644,56715,56743,57914,58217,69583,76438,80859,98365,217370,246177,380732	App,Bcl3,Bcl6,C1qa,C3,Ctsc,Ctsh,Fcgr2b,Fosl2,Hlx,Cd74,Il4ra,Itgal,Jag1,Lbp,Cd244a,Slc11a1,Enpp1,Cfp,Plec,Ptger4,Ptk2b,Rasgrp1,St3gal1,Spn,Trex1,Gadd45g,Icosl,Irf7,Clec7a,Rabgef1,Lat2,Crlf2,Trem1,Tnfsf13,Rftn1,Nfkbiz,Slamf9,Cybc1,Myo1g,Milr1	41/542
16_Member	GO Biological Processes	GO:0042092	type 2 immune response	-3.35911	-1.48156	12051,12053,14284,15284,16190,57914	Bcl3,Bcl6,Fosl2,Hlx,Il4ra,Crlf2	6/24
16_Member	GO Biological Processes	GO:0045063	T-helper 1 cell differentiation	-3.22722	-1.39842	15284,16190,20737,23882,80859	Hlx,Il4ra,Spn,Gadd45g,Nfkbiz	5/17
16_Member	GO Biological Processes	GO:0002294	CD4-positive, alpha-beta T cell differentiation involved in immune response	-3.15093	-1.34924	12051,12053,15284,16190,19219,20737,23882,80859	Bcl3,Bcl6,Hlx,Il4ra,Ptger4,Spn,Gadd45g,Nfkbiz	8/46
16_Member	GO Biological Processes	GO:0042093	T-helper cell differentiation	-3.15093	-1.34924	12051,12053,15284,16190,19219,20737,23882,80859	Bcl3,Bcl6,Hlx,Il4ra,Ptger4,Spn,Gadd45g,Nfkbiz	8/46
16_Member	GO Biological Processes	GO:0045064	T-helper 2 cell differentiation	-3.0505	-1.28369	12051,12053,15284,16190	Bcl3,Bcl6,Hlx,Il4ra	4/11
16_Member	GO Biological Processes	GO:0002293	alpha-beta T cell differentiation involved in immune response	-3.02371	-1.26896	12051,12053,15284,16190,19219,20737,23882,80859	Bcl3,Bcl6,Hlx,Il4ra,Ptger4,Spn,Gadd45g,Nfkbiz	8/48
16_Member	GO Biological Processes	GO:0002285	lymphocyte activation involved in immune response	-2.98595	-1.24473	12051,12053,15284,16149,16190,16408,18106,18173,18605,19219,19229,20442,20737,23882,50723,80859	Bcl3,Bcl6,Hlx,Cd74,Il4ra,Itgal,Cd244a,Slc11a1,Enpp1,Ptger4,Ptk2b,St3gal1,Spn,Gadd45g,Icosl,Nfkbiz	16/154
16_Member	GO Biological Processes	GO:0002287	alpha-beta T cell activation involved in immune response	-2.96278	-1.2334	12051,12053,15284,16190,19219,20737,23882,80859	Bcl3,Bcl6,Hlx,Il4ra,Ptger4,Spn,Gadd45g,Nfkbiz	8/49
16_Member	GO Biological Processes	GO:0002460	adaptive immune response based on somatic recombination of immune receptors built from immunoglobulin superfamily domains	-2.93518	-1.21217	12051,12053,12259,12266,12267,13032,13036,14130,14284,15284,16068,16149,16190,16449,18128,18173,18605,20737,22040,23882,50723,54123,57914,69583,76438,80859,246177	Bcl3,Bcl6,C1qa,C3,C3ar1,Ctsc,Ctsh,Fcgr2b,Fosl2,Hlx,Il18bp,Cd74,Il4ra,Jag1,Notch1,Slc11a1,Enpp1,Spn,Trex1,Gadd45g,Icosl,Irf7,Crlf2,Tnfsf13,Rftn1,Nfkbiz,Myo1g	27/330
16_Member	GO Biological Processes	GO:0002292	T cell differentiation involved in immune response	-2.78978	-1.1235	12051,12053,15284,16190,19219,20737,23882,80859	Bcl3,Bcl6,Hlx,Il4ra,Ptger4,Spn,Gadd45g,Nfkbiz	8/52
16_Member	GO Biological Processes	GO:0032609	type II interferon production	-2.7715	-1.11616	12051,15975,18173,18605,20737,23882,80859	Bcl3,Ifnar1,Slc11a1,Enpp1,Spn,Gadd45g,Nfkbiz	7/41
16_Member	GO Biological Processes	GO:0035710	CD4-positive, alpha-beta T cell activation	-2.6438	-1.03063	12051,12053,12522,15284,16190,18782,19219,20737,23882,80859	Bcl3,Bcl6,Cd83,Hlx,Il4ra,Pla2g2d,Ptger4,Spn,Gadd45g,Nfkbiz	10/80
16_Member	GO Biological Processes	GO:0002286	T cell activation involved in immune response	-2.58549	-1.00716	12051,12053,15284,16149,16190,16408,18173,19219,20737,23882,80859	Bcl3,Bcl6,Hlx,Cd74,Il4ra,Itgal,Slc11a1,Ptger4,Spn,Gadd45g,Nfkbiz	11/95
16_Member	GO Biological Processes	GO:0002443	leukocyte mediated immunity	-2.11207	-0.726406	12051,12053,12259,12266,13032,13036,14130,14284,16149,16190,16449,18173,18605,19419,22040,50723,54123,56715,56743,57914,58217,69583,76438,80859,98365,246177,380732	Bcl3,Bcl6,C1qa,C3,Ctsc,Ctsh,Fcgr2b,Fosl2,Cd74,Il4ra,Jag1,Slc11a1,Enpp1,Rasgrp1,Trex1,Icosl,Irf7,Rabgef1,Lat2,Crlf2,Trem1,Tnfsf13,Rftn1,Nfkbiz,Slamf9,Myo1g,Milr1	27/379
17_Member	GO Biological Processes	GO:0141124	intracellular signaling cassette	-6.4433	-3.86497	11820,12051,12053,12267,12393,12504,12768,12795,13036,14173,14726,15368,16176,16362,16408,16443,17164,17869,17925,18035,18577,18578,18583,18584,19219,19229,19419,20410,20928,21825,21897,22433,24088,26408,26411,27261,50932,53608,53859,54196,54199,56212,56289,56715,56743,66725,71132,71609,71653,104418,108100,170744,192662,207565,208727,233979,234353,236266,260409,269608,319899,320292,381290,665113	App,Bcl3,Bcl6,C3ar1,Runx2,Cd4,Ccr1,Plk3,Ctsh,Fgf2,Pdpn,Hmox1,Il1b,Irf1,Itgal,Itsn1,Mapkapk2,Myc,Myo9b,Nfkbia,Pde4a,Pde4b,Pde7a,Pde8a,Ptger4,Ptk2b,Rasgrp1,Sorbs3,Abcc9,Thbs1,Tlr1,Xbp1,Tlr2,Map3k5,Map4k1,Dok3,Mink1,Map3k6,Map3k14,Pabpn1,Ccrl2,Rhog,Rassf1,Rabgef1,Lat2,Lrrk2,Cabyr,Tradd,Shtn1,Dgkz,Baiap2,Tlr8,Arhgdia,Camkk2,Hdac4,Tpcn2,Psd3,Alms1,Cdc42ep3,Plekhg5,Dock6,Rasgef1b,Atp2b4,Tnik	64/767
17_Member	GO Biological Processes	GO:0007266	Rho protein signal transduction	-3.09411	-1.31337	12053,14726,17925,56212,66725,71653,108100,192662,260409,269608	Bcl6,Pdpn,Myo9b,Rhog,Lrrk2,Shtn1,Baiap2,Arhgdia,Cdc42ep3,Plekhg5	10/70
17_Member	GO Biological Processes	GO:0007264	small GTPase-mediated signal transduction	-2.36995	-0.864292	12053,14726,15368,16443,17925,19419,27261,56212,56289,56715,66725,71653,104418,108100,192662,234353,260409,269608,319899,320292	Bcl6,Pdpn,Hmox1,Itsn1,Myo9b,Rasgrp1,Dok3,Rhog,Rassf1,Rabgef1,Lrrk2,Shtn1,Dgkz,Baiap2,Arhgdia,Psd3,Cdc42ep3,Plekhg5,Dock6,Rasgef1b	20/242
18_Member	GO Biological Processes	GO:0051129	negative regulation of cellular component organization	-6.27224	-3.73694	11305,11812,11813,11820,11856,12048,12257,12333,12550,12642,13132,13367,13685,14089,14130,14694,14976,15185,15234,16176,16886,17216,17387,18128,18413,18627,19062,19158,19219,20660,20742,22121,22248,23790,24088,50918,52538,54198,56612,56715,59030,59035,63986,66725,68014,69076,69710,73914,74244,74694,74919,75744,94232,100952,107817,192176,226422,227753,231580,233781,235041,245857,380711	Abca2,Apoc1,Apoc2,App,Arhgap6,Bcl2l1,Tspo,Capn1,Cdh1,Ch25h,Dab2,Diaph1,Eif4ebp1,Fap,Fcgr2b,Rack1,Pfdn6,Hdac6,Hgf,Il1b,Limk2,Mcm2,Mmp14,Notch1,Osm,Per2,Inpp5k,Cyth2,Ptger4,Sorl1,Sptbn1,Rpl13a,Unc119,Coro1c,Tlr2,Myadm,Acaa2,Snx3,Pfdn5,Rabgef1,Mkks,Carm1,Gmfg,Lrrk2,Zwilch,Triap1,Arap1,Irak3,Atg7,Tbc1d30,Slc35f6,Svip,Ubqln4,Emilin1,Jmjd6,Flna,Rab29,Gsn,Gak,Xylt1,Kank2,Ssh3,Rap1gap2	63/759
19_Member	GO Biological Processes	GO:0005975	carbohydrate metabolic process	-6.06879	-3.54958	14042,14345,14571,14635,14667,14751,14873,15531,17158,17159,17254,17869,17939,18605,18627,18641,18642,20452,21351,21991,22228,22619,26879,27376,28146,58810,59031,67526,67880,69976,71835,74777,75578,94284,108099,110006,212974,226101,227619,230796,245847,329015	Ext1,Fut4,Gpd2,Galk1,Gm2a,Gpi1,Gsto1,Ndst1,Man2a1,Man2b1,Slc3a2,Myc,Naga,Enpp1,Per2,Pfkl,Pfkm,St8sia4,Taldo1,Tpi1,Ucp2,Siae,B3galnt1,Slc25a10,Serp1,Akr1a1,Chst12,Atg12,Dcxr,Galk2,Lancl2,Selenon,Fggy,Ugt1a6a,Prkag2,Gusb,Pgghg,Myof,Man1b1,Wdtc1,Amdhd2,Atg2a	42/432
19_Member	GO Biological Processes	GO:1901136	carbohydrate derivative catabolic process	-3.73032	-1.69133	14173,14635,14667,14751,17939,18577,18605,18641,18642,19156,21991,22228,22436,23959,27029,27052,50773,56174,110006,224794,227619,245847	Fgf2,Galk1,Gm2a,Gpi1,Naga,Pde4a,Enpp1,Pfkl,Pfkm,Psap,Tpi1,Ucp2,Xdh,Nt5e,Sgsh,Aoah,Nt5c,Nagk,Gusb,Enpp4,Man1b1,Amdhd2	22/217
19_Member	GO Biological Processes	GO:0072521	purine-containing compound metabolic process	-3.47638	-1.54608	11513,11637,11821,11958,14104,14571,14635,14751,15356,18577,18605,18641,18642,20750,20928,21351,21881,21991,22228,22436,23959,50773,52538,54683,56520,66043,66725,66812,66916,67126,67184,67880,68087,74147,74777,75406,223646,224794	Adcy7,Ak2,Aprt,Atp5me,Fasn,Gpd2,Galk1,Gpi1,Hmgcl,Pde4a,Enpp1,Pfkl,Pfkm,Spp1,Abcc9,Taldo1,Tkt,Tpi1,Ucp2,Xdh,Nt5e,Nt5c,Acaa2,Prdx5,Nme4,Atp5f1d,Lrrk2,Ppcdc,Ndufb7,Atp5f1e,Ndufa13,Dcxr,Dcakd,Ehhadh,Selenon,Ndufs7,Naprt,Enpp4	38/487
19_Member	GO Biological Processes	GO:0006163	purine nucleotide metabolic process	-3.47321	-1.54608	11513,11637,11821,11958,14104,14571,14635,14751,15356,18577,18605,18641,18642,20928,21351,21881,21991,22228,22436,23959,50773,52538,54683,56520,66043,66725,66812,66916,67126,67184,67880,68087,74147,74777,75406,223646	Adcy7,Ak2,Aprt,Atp5me,Fasn,Gpd2,Galk1,Gpi1,Hmgcl,Pde4a,Enpp1,Pfkl,Pfkm,Abcc9,Taldo1,Tkt,Tpi1,Ucp2,Xdh,Nt5e,Nt5c,Acaa2,Prdx5,Nme4,Atp5f1d,Lrrk2,Ppcdc,Ndufb7,Atp5f1e,Ndufa13,Dcxr,Dcakd,Ehhadh,Selenon,Ndufs7,Naprt	36/453
19_Member	GO Biological Processes	GO:0005996	monosaccharide metabolic process	-3.45372	-1.54245	14571,14635,14751,14873,17158,17159,17869,18627,18641,18642,21991,27376,28146,58810,67880,69976,74777,75578,94284,230796	Gpd2,Galk1,Gpi1,Gsto1,Man2a1,Man2b1,Myc,Per2,Pfkl,Pfkm,Tpi1,Slc25a10,Serp1,Akr1a1,Dcxr,Galk2,Selenon,Fggy,Ugt1a6a,Wdtc1	20/197
19_Member	GO Biological Processes	GO:0006753	nucleoside phosphate metabolic process	-3.32923	-1.45883	11513,11637,11821,11958,14104,14571,14635,14751,15356,18577,18605,18641,18642,20928,21351,21881,21991,22228,22247,22436,23959,50773,52538,54683,56520,66043,66725,66812,66916,67126,67184,67880,68087,68106,74147,74777,75406,76025,223646	Adcy7,Ak2,Aprt,Atp5me,Fasn,Gpd2,Galk1,Gpi1,Hmgcl,Pde4a,Enpp1,Pfkl,Pfkm,Abcc9,Taldo1,Tkt,Tpi1,Ucp2,Umps,Xdh,Nt5e,Nt5c,Acaa2,Prdx5,Nme4,Atp5f1d,Lrrk2,Ppcdc,Ndufb7,Atp5f1e,Ndufa13,Dcxr,Dcakd,Nt5c3b,Ehhadh,Selenon,Ndufs7,Cant1,Naprt	39/513
19_Member	GO Biological Processes	GO:0009185	ribonucleoside diphosphate metabolic process	-3.29971	-1.43808	11637,14635,14751,18605,18641,18642,21991,22228,22247,23959,76025	Ak2,Galk1,Gpi1,Enpp1,Pfkl,Pfkm,Tpi1,Ucp2,Umps,Nt5e,Cant1	11/78
19_Member	GO Biological Processes	GO:0006091	generation of precursor metabolites and energy	-3.28697	-1.43115	11958,12857,12858,12861,12868,14635,14751,15356,18605,18627,18641,18642,18810,20463,20928,21351,21881,21991,22040,22228,66043,66152,66916,67126,67184,67526,74777,75406,108099,329015	Atp5me,Cox4i1,Cox5a,Cox6a1,Cox8a,Galk1,Gpi1,Hmgcl,Enpp1,Per2,Pfkl,Pfkm,Plec,Cox7a2l,Abcc9,Taldo1,Tkt,Tpi1,Trex1,Ucp2,Atp5f1d,Uqcr10,Ndufb7,Atp5f1e,Ndufa13,Atg12,Selenon,Ndufs7,Prkag2,Atg2a	30/362
19_Member	GO Biological Processes	GO:0009117	nucleotide metabolic process	-3.15899	-1.35174	11513,11637,11821,11958,14104,14571,14635,14751,15356,18577,18605,18641,18642,20928,21351,21881,21991,22228,22247,22436,23959,50773,52538,54683,56520,66043,66725,66812,66916,67126,67184,67880,68087,68106,74147,74777,75406,223646	Adcy7,Ak2,Aprt,Atp5me,Fasn,Gpd2,Galk1,Gpi1,Hmgcl,Pde4a,Enpp1,Pfkl,Pfkm,Abcc9,Taldo1,Tkt,Tpi1,Ucp2,Umps,Xdh,Nt5e,Nt5c,Acaa2,Prdx5,Nme4,Atp5f1d,Lrrk2,Ppcdc,Ndufb7,Atp5f1e,Ndufa13,Dcxr,Dcakd,Nt5c3b,Ehhadh,Selenon,Ndufs7,Naprt	38/506
19_Member	GO Biological Processes	GO:0009150	purine ribonucleotide metabolic process	-3.13219	-1.33652	11513,11637,11821,11958,14104,14635,14751,15356,18577,18605,18641,18642,20928,21991,22228,22436,23959,50773,52538,56520,66043,66725,66812,66916,67126,67184,68087,74147,74777,75406	Adcy7,Ak2,Aprt,Atp5me,Fasn,Galk1,Gpi1,Hmgcl,Pde4a,Enpp1,Pfkl,Pfkm,Abcc9,Tpi1,Ucp2,Xdh,Nt5e,Nt5c,Acaa2,Nme4,Atp5f1d,Lrrk2,Ppcdc,Ndufb7,Atp5f1e,Ndufa13,Dcakd,Ehhadh,Selenon,Ndufs7	30/370
19_Member	GO Biological Processes	GO:0009259	ribonucleotide metabolic process	-3.09293	-1.31337	11513,11637,11821,11958,14104,14635,14751,15356,18577,18605,18641,18642,20928,21991,22228,22247,22436,23959,50773,52538,56520,66043,66725,66812,66916,67126,67184,68087,74147,74777,75406	Adcy7,Ak2,Aprt,Atp5me,Fasn,Galk1,Gpi1,Hmgcl,Pde4a,Enpp1,Pfkl,Pfkm,Abcc9,Tpi1,Ucp2,Umps,Xdh,Nt5e,Nt5c,Acaa2,Nme4,Atp5f1d,Lrrk2,Ppcdc,Ndufb7,Atp5f1e,Ndufa13,Dcakd,Ehhadh,Selenon,Ndufs7	31/389
19_Member	GO Biological Processes	GO:0009132	nucleoside diphosphate metabolic process	-3.02338	-1.26896	11637,14635,14751,18605,18641,18642,21991,22228,22247,23959,76025	Ak2,Galk1,Gpi1,Enpp1,Pfkl,Pfkm,Tpi1,Ucp2,Umps,Nt5e,Cant1	11/84
19_Member	GO Biological Processes	GO:0046835	carbohydrate phosphorylation	-2.98447	-1.24473	14635,18641,18642,69976,75578	Galk1,Pfkl,Pfkm,Galk2,Fggy	5/19
19_Member	GO Biological Processes	GO:0046031	ADP metabolic process	-2.93963	-1.21332	11637,14635,14751,18605,18641,18642,21991,22228,23959	Ak2,Galk1,Gpi1,Enpp1,Pfkl,Pfkm,Tpi1,Ucp2,Nt5e	9/61
19_Member	GO Biological Processes	GO:0019693	ribose phosphate metabolic process	-2.9323	-1.21055	11513,11637,11821,11958,14104,14635,14751,15356,18577,18605,18641,18642,20928,21991,22228,22247,22436,23959,50773,52538,56520,66043,66725,66812,66916,67126,67184,68087,74147,74777,75406	Adcy7,Ak2,Aprt,Atp5me,Fasn,Galk1,Gpi1,Hmgcl,Pde4a,Enpp1,Pfkl,Pfkm,Abcc9,Tpi1,Ucp2,Umps,Xdh,Nt5e,Nt5c,Acaa2,Nme4,Atp5f1d,Lrrk2,Ppcdc,Ndufb7,Atp5f1e,Ndufa13,Dcakd,Ehhadh,Selenon,Ndufs7	31/398
19_Member	GO Biological Processes	GO:0061620	glycolytic process through glucose-6-phosphate	-2.87511	-1.17664	14635,14751,18641,18642,21991	Galk1,Gpi1,Pfkl,Pfkm,Tpi1	5/20
19_Member	GO Biological Processes	GO:0055086	nucleobase-containing small molecule metabolic process	-2.78086	-1.11789	11513,11637,11821,11958,14104,14571,14635,14751,15356,18577,18605,18641,18642,20928,21351,21881,21991,22228,22247,22436,23959,50773,52538,54683,56520,66043,66725,66812,66916,67126,67184,67880,68087,68106,74147,74777,75406,76025,223646,224794	Adcy7,Ak2,Aprt,Atp5me,Fasn,Gpd2,Galk1,Gpi1,Hmgcl,Pde4a,Enpp1,Pfkl,Pfkm,Abcc9,Taldo1,Tkt,Tpi1,Ucp2,Umps,Xdh,Nt5e,Nt5c,Acaa2,Prdx5,Nme4,Atp5f1d,Lrrk2,Ppcdc,Ndufb7,Atp5f1e,Ndufa13,Dcxr,Dcakd,Nt5c3b,Ehhadh,Selenon,Ndufs7,Cant1,Naprt,Enpp4	40/567
19_Member	GO Biological Processes	GO:0009191	ribonucleoside diphosphate catabolic process	-2.74055	-1.09057	14635,14751,18605,18641,18642,21991,22228,23959,76025	Galk1,Gpi1,Enpp1,Pfkl,Pfkm,Tpi1,Ucp2,Nt5e,Cant1	9/65
19_Member	GO Biological Processes	GO:0009135	purine nucleoside diphosphate metabolic process	-2.69348	-1.0623	11637,14635,14751,18605,18641,18642,21991,22228,23959	Ak2,Galk1,Gpi1,Enpp1,Pfkl,Pfkm,Tpi1,Ucp2,Nt5e	9/66
19_Member	GO Biological Processes	GO:0009179	purine ribonucleoside diphosphate metabolic process	-2.69348	-1.0623	11637,14635,14751,18605,18641,18642,21991,22228,23959	Ak2,Galk1,Gpi1,Enpp1,Pfkl,Pfkm,Tpi1,Ucp2,Nt5e	9/66
19_Member	GO Biological Processes	GO:0061615	glycolytic process through fructose-6-phosphate	-2.67613	-1.04934	14635,14751,18641,18642,21991	Galk1,Gpi1,Pfkl,Pfkm,Tpi1	5/22
19_Member	GO Biological Processes	GO:0009144	purine nucleoside triphosphate metabolic process	-2.64637	-1.03163	11637,11958,14635,14751,18605,18641,18642,20928,21991,22228,56520,66043,66725,66916,67126,67184,74777,75406	Ak2,Atp5me,Galk1,Gpi1,Enpp1,Pfkl,Pfkm,Abcc9,Tpi1,Ucp2,Nme4,Atp5f1d,Lrrk2,Ndufb7,Atp5f1e,Ndufa13,Selenon,Ndufs7	18/197
19_Member	GO Biological Processes	GO:0009134	nucleoside diphosphate catabolic process	-2.60237	-1.01674	14635,14751,18605,18641,18642,21991,22228,23959,76025	Galk1,Gpi1,Enpp1,Pfkl,Pfkm,Tpi1,Ucp2,Nt5e,Cant1	9/68
19_Member	GO Biological Processes	GO:0009154	purine ribonucleotide catabolic process	-2.58549	-1.00716	14635,14751,18577,18605,18641,18642,21991,22228,22436,23959,50773	Galk1,Gpi1,Pde4a,Enpp1,Pfkl,Pfkm,Tpi1,Ucp2,Xdh,Nt5e,Nt5c	11/95
19_Member	GO Biological Processes	GO:0046032	ADP catabolic process	-2.53028	-0.961565	14635,14751,18605,18641,18642,21991,22228,23959	Galk1,Gpi1,Enpp1,Pfkl,Pfkm,Tpi1,Ucp2,Nt5e	8/57
19_Member	GO Biological Processes	GO:0016052	carbohydrate catabolic process	-2.51888	-0.956539	14635,14667,14751,17159,17939,18605,18641,18642,21991,22228,67526,329015	Galk1,Gm2a,Gpi1,Man2b1,Naga,Enpp1,Pfkl,Pfkm,Tpi1,Ucp2,Atg12,Atg2a	12/111
19_Member	GO Biological Processes	GO:0046496	nicotinamide nucleotide metabolic process	-2.50404	-0.946041	14571,14635,14751,18605,18641,18642,21351,21881,21991,22228,54683,67880,223646	Gpd2,Galk1,Gpi1,Enpp1,Pfkl,Pfkm,Taldo1,Tkt,Tpi1,Ucp2,Prdx5,Dcxr,Naprt	13/126
19_Member	GO Biological Processes	GO:0009205	purine ribonucleoside triphosphate metabolic process	-2.48384	-0.936077	11958,14635,14751,18605,18641,18642,20928,21991,22228,56520,66043,66725,66916,67126,67184,74777,75406	Atp5me,Galk1,Gpi1,Enpp1,Pfkl,Pfkm,Abcc9,Tpi1,Ucp2,Nme4,Atp5f1d,Lrrk2,Ndufb7,Atp5f1e,Ndufa13,Selenon,Ndufs7	17/188
19_Member	GO Biological Processes	GO:0072523	purine-containing compound catabolic process	-2.45477	-0.908689	14635,14751,18577,18605,18641,18642,21991,22228,22436,23959,50773,224794	Galk1,Gpi1,Pde4a,Enpp1,Pfkl,Pfkm,Tpi1,Ucp2,Xdh,Nt5e,Nt5c,Enpp4	12/113
19_Member	GO Biological Processes	GO:0019362	pyridine nucleotide metabolic process	-2.44467	-0.903602	14571,14635,14751,18605,18641,18642,21351,21881,21991,22228,54683,67880,223646	Gpd2,Galk1,Gpi1,Enpp1,Pfkl,Pfkm,Taldo1,Tkt,Tpi1,Ucp2,Prdx5,Dcxr,Naprt	13/128
19_Member	GO Biological Processes	GO:0006002	fructose 6-phosphate metabolic process	-2.38385	-0.876326	14751,18641,18642,21351	Gpi1,Pfkl,Pfkm,Taldo1	4/16
19_Member	GO Biological Processes	GO:0009137	purine nucleoside diphosphate catabolic process	-2.34481	-0.845667	14635,14751,18605,18641,18642,21991,22228,23959	Galk1,Gpi1,Enpp1,Pfkl,Pfkm,Tpi1,Ucp2,Nt5e	8/61
19_Member	GO Biological Processes	GO:0009181	purine ribonucleoside diphosphate catabolic process	-2.34481	-0.845667	14635,14751,18605,18641,18642,21991,22228,23959	Galk1,Gpi1,Enpp1,Pfkl,Pfkm,Tpi1,Ucp2,Nt5e	8/61
19_Member	GO Biological Processes	GO:0046034	ATP metabolic process	-2.32584	-0.836385	11958,14635,14751,18605,18641,18642,20928,21991,22228,66043,66916,67126,67184,74777,75406	Atp5me,Galk1,Gpi1,Enpp1,Pfkl,Pfkm,Abcc9,Tpi1,Ucp2,Atp5f1d,Ndufb7,Atp5f1e,Ndufa13,Selenon,Ndufs7	15/163
19_Member	GO Biological Processes	GO:0009199	ribonucleoside triphosphate metabolic process	-2.32284	-0.834119	11958,14635,14751,18605,18641,18642,20928,21991,22228,56520,66043,66725,66916,67126,67184,74777,75406	Atp5me,Galk1,Gpi1,Enpp1,Pfkl,Pfkm,Abcc9,Tpi1,Ucp2,Nme4,Atp5f1d,Lrrk2,Ndufb7,Atp5f1e,Ndufa13,Selenon,Ndufs7	17/195
19_Member	GO Biological Processes	GO:0009141	nucleoside triphosphate metabolic process	-2.30732	-0.822272	11637,11958,14635,14751,18605,18641,18642,20928,21991,22228,56520,66043,66725,66916,67126,67184,74777,75406	Ak2,Atp5me,Galk1,Gpi1,Enpp1,Pfkl,Pfkm,Abcc9,Tpi1,Ucp2,Nme4,Atp5f1d,Lrrk2,Ndufb7,Atp5f1e,Ndufa13,Selenon,Ndufs7	18/212
19_Member	GO Biological Processes	GO:0006735	NADH regeneration	-2.28225	-0.811007	14751,18641,18642,21991	Gpi1,Pfkl,Pfkm,Tpi1	4/17
19_Member	GO Biological Processes	GO:0061621	canonical glycolysis	-2.28225	-0.811007	14751,18641,18642,21991	Gpi1,Pfkl,Pfkm,Tpi1	4/17
19_Member	GO Biological Processes	GO:0061718	glucose catabolic process to pyruvate	-2.28225	-0.811007	14751,18641,18642,21991	Gpi1,Pfkl,Pfkm,Tpi1	4/17
19_Member	GO Biological Processes	GO:0009261	ribonucleotide catabolic process	-2.281	-0.811007	14635,14751,18577,18605,18641,18642,21991,22228,22436,23959,50773	Galk1,Gpi1,Pde4a,Enpp1,Pfkl,Pfkm,Tpi1,Ucp2,Xdh,Nt5e,Nt5c	11/104
19_Member	GO Biological Processes	GO:0072524	pyridine-containing compound metabolic process	-2.19533	-0.768274	14571,14635,14751,18605,18641,18642,21351,21881,21991,22228,54683,67880,223646	Gpd2,Galk1,Gpi1,Enpp1,Pfkl,Pfkm,Taldo1,Tkt,Tpi1,Ucp2,Prdx5,Dcxr,Naprt	13/137
19_Member	GO Biological Processes	GO:0006195	purine nucleotide catabolic process	-2.18855	-0.767319	14635,14751,18577,18605,18641,18642,21991,22228,22436,23959,50773	Galk1,Gpi1,Pde4a,Enpp1,Pfkl,Pfkm,Tpi1,Ucp2,Xdh,Nt5e,Nt5c	11/107
19_Member	GO Biological Processes	GO:0006096	glycolytic process	-2.12912	-0.732282	14635,14751,18605,18641,18642,21991,22228	Galk1,Gpi1,Enpp1,Pfkl,Pfkm,Tpi1,Ucp2	7/53
19_Member	GO Biological Processes	GO:0046434	organophosphate catabolic process	-2.0992	-0.724987	11758,14635,14751,18577,18605,18641,18642,18806,21991,22228,22436,23959,27226,50773,66857,76025	Prdx6,Galk1,Gpi1,Pde4a,Enpp1,Pfkl,Pfkm,Pld2,Tpi1,Ucp2,Xdh,Nt5e,Pla2g7,Nt5c,Plbd1,Cant1	16/189
19_Member	GO Biological Processes	GO:0019318	hexose metabolic process	-2.09189	-0.719937	14571,14635,14751,17158,17159,17869,18627,18641,18642,21991,27376,28146,67880,69976,230796	Gpd2,Galk1,Gpi1,Man2a1,Man2b1,Myc,Per2,Pfkl,Pfkm,Tpi1,Slc25a10,Serp1,Dcxr,Galk2,Wdtc1	15/173
20_Member	GO Biological Processes	GO:1900744	regulation of p38MAPK cascade	-5.83327	-3.3661	15234,16176,16534,18626,19252,22350,22436,23882,26408,50932,227753	Hgf,Il1b,Kcnn4,Per1,Dusp1,Ezr,Xdh,Gadd45g,Map3k5,Mink1,Gsn	11/43
20_Member	GO Biological Processes	GO:1900745	positive regulation of p38MAPK cascade	-3.63547	-1.64071	16176,16534,22436,23882,26408,50932,227753	Il1b,Kcnn4,Xdh,Gadd45g,Map3k5,Mink1,Gsn	7/30

## Sheet: Fig4_SharedEnrichmentGenes
Table 2.4	Fig4_SharedEnrichmentGenes
[truncated: 189 more rows]

## Sheet: Fig4_SharedEnrichment
Table 2.5	Fig4_SharedEnrichment
GroupID	Category	Term	Description	LogP	Log(q-value)	Genes	Symbols	InTerm_InList
1_Summary	GO Biological Processes	GO:0002694	regulation of leukocyte activation	-16.3428	-12.1914	196,301,864,916,944,952,2335,3108,3120,3122,3481,3485,3956,3958,4254,5618,5914,6347,6385,7412,10451,10673,10875,26191,26228,51063,146722,729230,348,960,3676,6484,948,6281,8829,4155,59341,684,6355	AHR,ANXA1,RUNX3,CD3E,TNFSF8,CD38,FN1,HLA-DMA,HLA-DQB2,HLA-DRA,IGF2,IGFBP2,LGALS1,LGALS3,KITLG,PRLR,RARA,CCL2,SDC4,VCAM1,VAV3,TNFSF13B,FGL2,PTPN22,STAP1,CALHM2,CD300LF,CCR2,APOE,CD44,ITGA4,ST3GAL4,CD36,S100A10,NRP1,MBP,TRPV4,BST2,CCL8	39/-
[truncated: 230 more rows]

## Sheet: Fig4_HumanUniqueGenes
Table 2.6	Fig4_HumanUniqueGenes
[truncated: 1,211 more rows]

## Sheet: Fig4_HumanUniqueEnrichment
Table 2.7	Fig4_HumanUniqueEnrichment
[truncated: 446 more rows]

## Sheet: HumanSpecific IPA URA
Table 2.8	Fig4i_HumanSpecific IPA URA
[truncated: 757 more rows]

## Sheet: UpMouse IPA URA
Table 2.9	Extend Data Fig4d_UpMouse IPA URA
[truncated: 275 more rows]

[truncated: 3 more sheets: Pairwise Human vs Mouse CD34MNC, UpHumanCD34MNC_Enrichment, UpMouseCD34MNC_Enrichment]
