# Supplementary material for: Global human myeloid replacement with peripheral progenitors induces interferonopathy and neurodegeneration
Source: Research Square preprint supplement (doi:10.21203/rs.3.rs-7762822/v1), 2025-10-03
Supplement: Supplementary file 2 [file bcaa019ed3d8b7bb0465c76b.xlsx]

## Sheet: 1.1 General introduction
Supplementary Table 1
Table 1.1 General Information	Ontogeny and environment drive transcription in brain myeloid cells. Related to Figure 2 and Extended Data Figure 2. This includes the LRT cluster genes, Metascape pathways and genes related to figure 2c, 2f, and 2h. Tabs also include the genes relative to the Venn diagram in figure 2l, 2m and extended data figure 2e.
Table 1.2	LRTcluster genes
Table 1.3	Fig2c_metascape
Table 1.4	Fig2f_metascape
Table 1.5	Fig2h_metascape
Table 1.6	Fig2l_venn diagram
Table 1.7	Fig2m_venn diagram
Table 1.8	Extended data Fig2e

## Sheet: 1.2 LRTcluster genes
Table 1.2	LRTcluster genes			genes	clusterid_internal	Figure Panel
This sheet contains the genes in each cluster according to the LRT analysis with degpatterns in Figure 2. Each cluster has a matching metascape for GO enrichment corresponding to specific figure panels				PLXNC1	1	Fig2b
				CD38	1	Fig2b
				DNAJC15	1	Fig2b
clusterid_internal	Figure Panel	#genes		CD200R1	1	Fig2b
Cluster1	Fig2b	1057		LOC100506098	1	Fig2b
Cluster3	Fig2e	1026		TMEM26	1	Fig2b
Cluster2	Fig2g	204		DAPK1	1	Fig2b
				LGALS3	1	Fig2b
				SASH1	1	Fig2b
				MCTP1	1	Fig2b
				LRRC61	1	Fig2b
				ACTN1	1	Fig2b
				HS3ST3B1	1	Fig2b
				ANXA1	1	Fig2b
				ZNF528	1	Fig2b
				PRSS36	1	Fig2b
				TGFBI	1	Fig2b
				FCGBP	1	Fig2b
				CD44	1	Fig2b
				HSD17B7P2	1	Fig2b
				HSH2D	1	Fig2b
				CHCHD2	1	Fig2b
				GAPLINC	1	Fig2b
				GNG12	1	Fig2b
				MBP	1	Fig2b
				KITLG	1	Fig2b
				MMP13	1	Fig2b
				ACVRL1	1	Fig2b
				ACP5	1	Fig2b
				CERKL	1	Fig2b
				CCDC170	1	Fig2b
				HACD4	1	Fig2b
				LINC01146	1	Fig2b
				NEURL3	1	Fig2b
				ANXA2	1	Fig2b
				ITGA4	1	Fig2b
				GBP4	1	Fig2b
				ZNF568	1	Fig2b
				FRG1EP	1	Fig2b
				RASGRP3	1	Fig2b
				FGD5	1	Fig2b
				IQGAP2	1	Fig2b
				LAMB2	1	Fig2b
				GCNT1	1	Fig2b
				ANXA2P2	1	Fig2b
				ZNF366	1	Fig2b
				TACC3	1	Fig2b
				ZNF572	1	Fig2b
				ZFP3	1	Fig2b
				CLDN1	1	Fig2b
				CRYBG1	1	Fig2b
				SPIRE1	1	Fig2b
				DUSP6	1	Fig2b
				APOL3	1	Fig2b
				SESTD1	1	Fig2b
				DRAM1	1	Fig2b
				CD48	1	Fig2b
				ARHGAP18	1	Fig2b
				TSHZ3	1	Fig2b
				MICAL2	1	Fig2b
				TSPAN4	1	Fig2b
				VAV3	1	Fig2b
				MIR4761	1	Fig2b
				MYO5A	1	Fig2b
				RALGDS	1	Fig2b
				MELTF	1	Fig2b
				WTAPP1	1	Fig2b
				ARL4C	1	Fig2b
				NAALADL1	1	Fig2b
				HK3	1	Fig2b
				HOXB4	1	Fig2b
				CCDC102A	1	Fig2b
				CRTC3	1	Fig2b
				SEMA4B	1	Fig2b
				CDR2	1	Fig2b
				LGI2	1	Fig2b
				TMEM26.AS1	1	Fig2b
				GNPDA1	1	Fig2b
				MIR155HG	1	Fig2b
				POMC	1	Fig2b
				SNTB2	1	Fig2b
				VIM.AS1	1	Fig2b
				DPYD.AS1	1	Fig2b
				CARD16	1	Fig2b
				ITGAD	1	Fig2b
				CDCA7L	1	Fig2b
				PRR5L	1	Fig2b
				PTPN22	1	Fig2b
				DNAH11	1	Fig2b
				ZNF506	1	Fig2b
				LOC105374454	1	Fig2b
				UTRN	1	Fig2b
				VIM	1	Fig2b
				DENND2D	1	Fig2b
				ME1	1	Fig2b
				ASRGL1	1	Fig2b
				CNIH3	1	Fig2b
				ST7	1	Fig2b
				VANGL1	1	Fig2b
				GPRC5B	1	Fig2b
				RPP25	1	Fig2b
				EPAS1	1	Fig2b
				SMAD1.AS1	1	Fig2b
				MDFIC	1	Fig2b
				DUSP10	1	Fig2b
				RTN1	1	Fig2b
				CD109	1	Fig2b
				BCL2	1	Fig2b
				PECAM1	1	Fig2b
				SLC38A6	1	Fig2b
				PDE7B	1	Fig2b
				ZNF257	1	Fig2b
				BRI3	1	Fig2b
				RHPN1	1	Fig2b
				GAS2L3	1	Fig2b
				CD80	1	Fig2b
				SMPDL3A	1	Fig2b
				MMP15	1	Fig2b
				MCOLN2	1	Fig2b
				MIR4458HG	1	Fig2b
				CALHM6	1	Fig2b
				RRN3P1	1	Fig2b
				FLNB	1	Fig2b
				LILRB1	1	Fig2b
				FAM24B.CUZD1	1	Fig2b
				GCLC	1	Fig2b
				SEL1L3	1	Fig2b
				TMEM150B	1	Fig2b
				GNG11	1	Fig2b
				ZNF618	1	Fig2b
				ST14	1	Fig2b
				RAB42	1	Fig2b
				CAMK1	1	Fig2b
				S1PR2	1	Fig2b
				RRAGD	1	Fig2b
				ZNF835	1	Fig2b
				SCAMP5	1	Fig2b
				LDB2	1	Fig2b
				ABCC3	1	Fig2b
				FXYD6	1	Fig2b
				PPM1H	1	Fig2b
				CSRP1	1	Fig2b
				CXCR2P1	1	Fig2b
				BTN3A3	1	Fig2b
				TRIM47	1	Fig2b
				JHY	1	Fig2b
				ANTXR2	1	Fig2b
				KIAA1958	1	Fig2b
				ESR1	1	Fig2b
				GALC	1	Fig2b
				TNFAIP8	1	Fig2b
				FOXRED2	1	Fig2b
				CLEC12A.AS1	1	Fig2b
				GRAMD4	1	Fig2b
				NLN	1	Fig2b
				SLAMF7	1	Fig2b
				RAP2B	1	Fig2b
				FECH	1	Fig2b
				IGFBP4	1	Fig2b
				ADGRE1	1	Fig2b
				CCL5	1	Fig2b
				GRM1	1	Fig2b
				NRP1	1	Fig2b
				PLBD1	1	Fig2b
				SDSL	1	Fig2b
				MPEG1	1	Fig2b
				CD300E	1	Fig2b
				MIR4315.1	1	Fig2b
				MIR4315.2	1	Fig2b
				SNX24	1	Fig2b
				GPNMB	1	Fig2b
				KLHDC7B	1	Fig2b
				CISD2	1	Fig2b
				ADAMDEC1	1	Fig2b
				DOCK1	1	Fig2b
				TMEM144	1	Fig2b
				OPTN	1	Fig2b
				IDO1	1	Fig2b
				TMEM51	1	Fig2b
				CUZD1	1	Fig2b
				PAPSS2	1	Fig2b
				TNFAIP2	1	Fig2b
				ARHGAP10	1	Fig2b
				HRH1	1	Fig2b
				LACC1	1	Fig2b
				SLC39A8	1	Fig2b
				CHST13	1	Fig2b
				CALHM2	1	Fig2b
				LILRA2	1	Fig2b
				CRTAM	1	Fig2b
				CXCR2	1	Fig2b
				COMT	1	Fig2b
				CREB5	1	Fig2b
				UNC5B	1	Fig2b
				TNFSF15	1	Fig2b
				GALM	1	Fig2b
				SOBP	1	Fig2b
				KATNAL1	1	Fig2b
				ZNF229	1	Fig2b
				LITAF	1	Fig2b
				HERC5	1	Fig2b
				FPR3	1	Fig2b
				GBP3	1	Fig2b
				TEC	1	Fig2b
				PCBD1	1	Fig2b
				AURKA	1	Fig2b
				AXL	1	Fig2b
				SERINC5	1	Fig2b
				CDC42BPA	1	Fig2b
				HSD17B4	1	Fig2b
				RHPN2	1	Fig2b
				TRPS1	1	Fig2b
				NUSAP1	1	Fig2b
				CHURC1.FNTB	1	Fig2b
				ZNF829	1	Fig2b
				RNASE1	1	Fig2b
				MS4A4A	1	Fig2b
				MS4A4E	1	Fig2b
				SMAD1	1	Fig2b
				LOC100130950	1	Fig2b
				MFHAS1	1	Fig2b
				STX2	1	Fig2b
				MS4A14	1	Fig2b
				GPC4	1	Fig2b
				SLC40A1	1	Fig2b
				CACNA2D3	1	Fig2b
				AGAP2	1	Fig2b
				EYA2	1	Fig2b
				IQGAP1	1	Fig2b
				LOC107985544	1	Fig2b
				PMP22	1	Fig2b
				CASP7	1	Fig2b
				MCC	1	Fig2b
				PLAU	1	Fig2b
				ZNF350	1	Fig2b
				SDS	1	Fig2b
				CXCL11	1	Fig2b
				ZNF559	1	Fig2b
				MS4A7	1	Fig2b
				DNAJC5B	1	Fig2b
				SLC30A4	1	Fig2b
				KCNAB2	1	Fig2b
				TNFSF13B	1	Fig2b
				PIP4P2	1	Fig2b
				SLC25A24	1	Fig2b
				MCM10	1	Fig2b
				PPFIBP1	1	Fig2b
				RNF144A	1	Fig2b
				HOXB6	1	Fig2b
				ZDHHC18	1	Fig2b
				GBP5	1	Fig2b
				PSTPIP1	1	Fig2b
				SCIMP	1	Fig2b
				SECTM1	1	Fig2b
				URB1.AS1	1	Fig2b
				LAMP3	1	Fig2b
				TENT5A	1	Fig2b
				SKA1	1	Fig2b
				GPR65	1	Fig2b
				LRRFIP1	1	Fig2b
				STARD13	1	Fig2b
				SLC25A43	1	Fig2b
				VSIG10	1	Fig2b
				SPG21	1	Fig2b
				HRNR	1	Fig2b
				CD6	1	Fig2b
				FAM213B	1	Fig2b
				AHR	1	Fig2b
				SAMD4A	1	Fig2b
				MRAS	1	Fig2b
				GOT1	1	Fig2b
				FNBP1	1	Fig2b
				LOC100506321	1	Fig2b
				BCL7A	1	Fig2b
				CPT1A	1	Fig2b
				KCTD1	1	Fig2b
				LDLRAD3	1	Fig2b
				ZNF880	1	Fig2b
				IGF2BP3	1	Fig2b
				TRIM6	1	Fig2b
				LOC101927070	1	Fig2b
				KMO	1	Fig2b
				BTN3A2	1	Fig2b
				CCNB1	1	Fig2b
				PBX3	1	Fig2b
				TRIM14	1	Fig2b
				SDC2	1	Fig2b
				PRLR	1	Fig2b
				C1orf21	1	Fig2b
				CAMTA1	1	Fig2b
				ARRDC4	1	Fig2b
				SLCO3A1	1	Fig2b
				TSPYL5	1	Fig2b
				TNFRSF14	1	Fig2b
				DMD	1	Fig2b
				S100A4	1	Fig2b
				MROH7	1	Fig2b
				CPAMD8	1	Fig2b
				C1orf127	1	Fig2b
				BUB1	1	Fig2b
				CD209	1	Fig2b
				SNN	1	Fig2b
				BATF2	1	Fig2b
				GPX3	1	Fig2b
				S1PR1	1	Fig2b
				RHNO1	1	Fig2b
				ZNF804A	1	Fig2b
				LILRA1	1	Fig2b
				CTSD	1	Fig2b
				PHACTR2	1	Fig2b
				IQCD	1	Fig2b
				ADGRG5	1	Fig2b
				ABCA5	1	Fig2b
				CPNE8	1	Fig2b
				TAF4B	1	Fig2b
				TMEM123	1	Fig2b
				APOL1	1	Fig2b
				LILRB2	1	Fig2b
				SIGLEC1	1	Fig2b
				ENDOD1	1	Fig2b
				SLC46A1	1	Fig2b
				RSPH3	1	Fig2b
				TRIB2	1	Fig2b
				SGTB	1	Fig2b
				DOCK5	1	Fig2b
				ACKR3	1	Fig2b
				H2AFY2	1	Fig2b
				FHAD1	1	Fig2b
				IFIH1	1	Fig2b
				NUPR1	1	Fig2b
				SGPL1	1	Fig2b
				LGALS1	1	Fig2b
				USP32P2	1	Fig2b
				HS3ST1	1	Fig2b
				RTP4	1	Fig2b
				B3GALNT1	1	Fig2b
				HOXB.AS1	1	Fig2b
				BTN2A3P	1	Fig2b
				RAD51AP1	1	Fig2b
				CSGALNACT2	1	Fig2b
				NR1H3	1	Fig2b
				KCNC4	1	Fig2b
				OTOA	1	Fig2b
				LAG3	1	Fig2b
				KLRF1	1	Fig2b
				TESPA1	1	Fig2b
				FGD6	1	Fig2b
				STK32B	1	Fig2b
				ASCL2	1	Fig2b
				TRIM59	1	Fig2b
				EIF4E3	1	Fig2b
				CENPE	1	Fig2b
				EVC	1	Fig2b
				LOC101927243	1	Fig2b
				GPRIN3	1	Fig2b
				CCSER1	1	Fig2b
				OTOF	1	Fig2b
				POTEE	1	Fig2b
				MAFB	1	Fig2b
				SIPA1L1	1	Fig2b
				LILRB5	1	Fig2b
				LBX2.AS1	1	Fig2b
				FAM218A	1	Fig2b
				SERPING1	1	Fig2b
				IL2RA	1	Fig2b
				RUNX3	1	Fig2b
				PLA2G16	1	Fig2b
				ERAP2	1	Fig2b
				NCF1	1	Fig2b
				HLA.DPA1	1	Fig2b
				SLX1A	1	Fig2b
				SLX1B	1	Fig2b
				GSAP	1	Fig2b
				BLVRB	1	Fig2b
				FKBP9	1	Fig2b
				RASGEF1B	1	Fig2b
				CEP83	1	Fig2b
				OPN3	1	Fig2b
				TMCO4	1	Fig2b
				KLRC4.KLRK1	1	Fig2b
				TXK	1	Fig2b
				SLC6A6	1	Fig2b
				CENPA	1	Fig2b
				ARMT1	1	Fig2b
				PRRG1	1	Fig2b
				NCF1C	1	Fig2b
				RARA	1	Fig2b
				SEMA4F	1	Fig2b
				ESCO2	1	Fig2b
				DIRC3	1	Fig2b
				LOC102723753	1	Fig2b
				CORO2A	1	Fig2b
				SLC38A5	1	Fig2b
				HLA.DRB1	1	Fig2b
				TGFB2	1	Fig2b
				EPHB2	1	Fig2b
				ADD3	1	Fig2b
				IQCK	1	Fig2b
				SLC22A5	1	Fig2b
				SLFN11	1	Fig2b
				FRMD4B	1	Fig2b
				FTL	1	Fig2b
				BHLHE40	1	Fig2b
				KCTD15	1	Fig2b
				DENND1B	1	Fig2b
				AP1S2	1	Fig2b
				MYO10	1	Fig2b
				ZNF382	1	Fig2b
				FABP3	1	Fig2b
				TRIM61	1	Fig2b
				C10orf55	1	Fig2b
				ECT2	1	Fig2b
				C9orf139	1	Fig2b
				ANAPC13	1	Fig2b
				ABHD6	1	Fig2b
				ZNF285	1	Fig2b
				PKD2L1	1	Fig2b
				C15orf38.AP3S2	1	Fig2b
				MMP14	1	Fig2b
				ATP1B3	1	Fig2b
				CXCL10	1	Fig2b
				SLFN13	1	Fig2b
				CADM1	1	Fig2b
				EDNRB	1	Fig2b
				PTER	1	Fig2b
				NRP2	1	Fig2b
				CXCL9	1	Fig2b
				CCDC144B	1	Fig2b
				BLVRA	1	Fig2b
				CD14	1	Fig2b
				FNTB	1	Fig2b
				CLDN12	1	Fig2b
				MITF	1	Fig2b
				MAP3K21	1	Fig2b
				IRF4	1	Fig2b
				SMC4	1	Fig2b
				GPR141	1	Fig2b
				CLIC4	1	Fig2b
				PARVB	1	Fig2b
				KLRK1	1	Fig2b
				UQCC2	1	Fig2b
				RUFY4	1	Fig2b
				SLFN5	1	Fig2b
				HOXB3	1	Fig2b
				TCHH	1	Fig2b
				ANKRD29	1	Fig2b
				ROR1	1	Fig2b
				SNRPC	1	Fig2b
				GLYATL1	1	Fig2b
				GLB1L	1	Fig2b
				KIF15	1	Fig2b
				MAPK13	1	Fig2b
				GVINP1	1	Fig2b
				CEP55	1	Fig2b
				ATG7	1	Fig2b
				TNFSF10	1	Fig2b
				TDRKH	1	Fig2b
				ARMCX1	1	Fig2b
				ST3GAL5	1	Fig2b
				ZNF114	1	Fig2b
				FAXDC2	1	Fig2b
				KLHDC8B	1	Fig2b
				KIF13A	1	Fig2b
				SAMD9	1	Fig2b
				HERC2P4	1	Fig2b
				HLA.DQB1	1	Fig2b
				SARM1	1	Fig2b
				ABLIM3	1	Fig2b
				MGC12916	1	Fig2b
				LOC101928123	1	Fig2b
				IFIT2	1	Fig2b
				GNS	1	Fig2b
				LGALS3BP	1	Fig2b
				CENPF	1	Fig2b
				LILRA5	1	Fig2b
				SYNE1	1	Fig2b
				NPC2	1	Fig2b
				KIR2DL4	1	Fig2b
				P4HA2	1	Fig2b
				TMEM37	1	Fig2b
				SPTA1	1	Fig2b
				ASAP1	1	Fig2b
				CCNB2	1	Fig2b
				SNX9	1	Fig2b
				ST18	1	Fig2b
				RAB11FIP1	1	Fig2b
				OSBPL1A	1	Fig2b
				AMDHD1	1	Fig2b
				DSE	1	Fig2b
				SELENOP	1	Fig2b
				LINC01094	1	Fig2b
				NT5C3A	1	Fig2b
				CLEC2B	1	Fig2b
				BHLHE40.AS1	1	Fig2b
				HGF	1	Fig2b
				CCR6	1	Fig2b
				NDRG1	1	Fig2b
				NABP2	1	Fig2b
				MACC1	1	Fig2b
				MLPH	1	Fig2b
				GPR82	1	Fig2b
				AKR1E2	1	Fig2b
				HLA.DPB1	1	Fig2b
				PRKAR2B	1	Fig2b
				NHS	1	Fig2b
				PTPRO	1	Fig2b
				CD1D	1	Fig2b
				ASPH	1	Fig2b
				TAGLN2	1	Fig2b
				ZNF585B	1	Fig2b
				CR1L	1	Fig2b
				LINC00900	1	Fig2b
				WWP1	1	Fig2b
				HCP5	1	Fig2b
				DPYD	1	Fig2b
				PGM1	1	Fig2b
				HLA.DQA1	1	Fig2b
				SLC22A15	1	Fig2b
				FRG1JP	1	Fig2b
				CCDC152	1	Fig2b
				HIST2H2BF	1	Fig2b
				HLA.DQB1.AS1	1	Fig2b
				CD163	1	Fig2b
				HLA.B	1	Fig2b
				HLA.DMA	1	Fig2b
				CD101	1	Fig2b
				ERAP1	1	Fig2b
				VTI1B	1	Fig2b
				CKAP2L	1	Fig2b
				NECAP2	1	Fig2b
				KLRC1	1	Fig2b
				LOC101927322	1	Fig2b
				KCNA3	1	Fig2b
				ABCC5	1	Fig2b
				CEPT1	1	Fig2b
				PLEK2	1	Fig2b
				PTPN20	1	Fig2b
				F11R	1	Fig2b
				ALDH1A1	1	Fig2b
				ARG2	1	Fig2b
				LRFN4	1	Fig2b
				WASHC2A	1	Fig2b
				LOC101927151	1	Fig2b
				TANC2	1	Fig2b
				SPATS2L	1	Fig2b
				LOC100506585	1	Fig2b
				SEMA4A	1	Fig2b
				IFNAR1	1	Fig2b
				MMP12	1	Fig2b
				SMS	1	Fig2b
				PAX8	1	Fig2b
				CD93	1	Fig2b
				TICAM2	1	Fig2b
				PRDX1	1	Fig2b
				LINC02328	1	Fig2b
				VENTX	1	Fig2b
				TNFRSF14.AS1	1	Fig2b
				ADAP2	1	Fig2b
				SLC2A9	1	Fig2b
				CDC20	1	Fig2b
				ST3GAL4	1	Fig2b
				PRICKLE1	1	Fig2b
				MDK	1	Fig2b
				CD9	1	Fig2b
				CXCL12	1	Fig2b
				CPPED1	1	Fig2b
				VNN1	1	Fig2b
				LOC606724	1	Fig2b
				EPSTI1	1	Fig2b
				HOXB2	1	Fig2b
				CXCL3	1	Fig2b
				LOC102467222	1	Fig2b
				DAB2IP	1	Fig2b
				BIRC3	1	Fig2b
				IL10	1	Fig2b
				RASGRF1	1	Fig2b
				ADGRG6	1	Fig2b
				DDX58	1	Fig2b
				NHLRC1	1	Fig2b
				CAPG	1	Fig2b
				KCNMA1	1	Fig2b
				LOC101927668	1	Fig2b
				FYB1	1	Fig2b
				WDR17	1	Fig2b
				OSTF1	1	Fig2b
				RITA1	1	Fig2b
				FGL2	1	Fig2b
				STX11	1	Fig2b
				MGLL	1	Fig2b
				CCDC26	1	Fig2b
				TPP1	1	Fig2b
				SMURF2	1	Fig2b
				PDE6G	1	Fig2b
				DYNLL1	1	Fig2b
				GPR160	1	Fig2b
				RRM2	1	Fig2b
				TMEM51.AS1	1	Fig2b
				CLEC1A	1	Fig2b
				TFAP2E	1	Fig2b
				CCL8	1	Fig2b
				SAMD9L	1	Fig2b
				EPS8L1	1	Fig2b
				NCEH1	1	Fig2b
				SGPP1	1	Fig2b
				RABGAP1L	1	Fig2b
				MIR6891	1	Fig2b
				SKA3	1	Fig2b
				CD68	1	Fig2b
				CD96	1	Fig2b
				FAM213A	1	Fig2b
				DOCK9	1	Fig2b
				GAS8	1	Fig2b
				ARL11	1	Fig2b
				HOTAIRM1	1	Fig2b
				CD28	1	Fig2b
				OSBPL3	1	Fig2b
				DAGLA	1	Fig2b
				NMNAT3	1	Fig2b
				RWDD2B	1	Fig2b
				COLEC12	1	Fig2b
				YBX1	1	Fig2b
				TMEM255A	1	Fig2b
				SLAMF8	1	Fig2b
				NCAPG	1	Fig2b
				CMTM1	1	Fig2b
				NCAPH	1	Fig2b
				RMND1	1	Fig2b
				TBC1D8.AS1	1	Fig2b
				YWHAH	1	Fig2b
				ZNF774	1	Fig2b
				DUSP3	1	Fig2b
				UBB	1	Fig2b
				GBP1	1	Fig2b
				GYPC	1	Fig2b
				TSPAN33	1	Fig2b
				MIR6503	1	Fig2b
				DTX4	1	Fig2b
				SNHG28	1	Fig2b
				GLMP	1	Fig2b
				FZD5	1	Fig2b
				PIMREG	1	Fig2b
				UAP1L1	1	Fig2b
				ADGRB1	1	Fig2b
				MAP2	1	Fig2b
				MEFV	1	Fig2b
				KIF18A	1	Fig2b
				LOC100128993	1	Fig2b
				MROH7.TTC4	1	Fig2b
				PXDC1	1	Fig2b
				KPNA2	1	Fig2b
				B3GNT7	1	Fig2b
				BAHCC1	1	Fig2b
				GAPT	1	Fig2b
				CXCL1	1	Fig2b
				TSPAN15	1	Fig2b
				MYOF	1	Fig2b
				TNFRSF11A	1	Fig2b
				DIRC2	1	Fig2b
				SH3PXD2A	1	Fig2b
				WIPF1	1	Fig2b
				ALMS1P1	1	Fig2b
				EMILIN2	1	Fig2b
				NAT8	1	Fig2b
				CLDN23	1	Fig2b
				EXOC3L1	1	Fig2b
				PSMB9	1	Fig2b
				CLMN	1	Fig2b
				ZNF726	1	Fig2b
				CYBB	1	Fig2b
				AKAP12	1	Fig2b
				LGALS12	1	Fig2b
				PIPOX	1	Fig2b
				PLXNA1	1	Fig2b
				TGFB2.OT1	1	Fig2b
				ARHGAP5	1	Fig2b
				SLAMF6	1	Fig2b
				IL2RB	1	Fig2b
				MICU1	1	Fig2b
				MTRNR2L6	1	Fig2b
				ERGIC1	1	Fig2b
				COL27A1	1	Fig2b
				LTBP2	1	Fig2b
				KLHL13	1	Fig2b
				ZNF543	1	Fig2b
				HNMT	1	Fig2b
				SH3BP5.AS1	1	Fig2b
				MIR4709	1	Fig2b
				KIF20A	1	Fig2b
				WASHC2C	1	Fig2b
				SLC17A5	1	Fig2b
				CLEC4F	1	Fig2b
				NCAM1	1	Fig2b
				APOBEC3D	1	Fig2b
				DTX1	1	Fig2b
				ST7.OT3	1	Fig2b
				MS4A6A	1	Fig2b
				EEF2K	1	Fig2b
				KCNN1	1	Fig2b
				TCF4	1	Fig2b
				MTM1	1	Fig2b
				SHB	1	Fig2b
				GBP1P1	1	Fig2b
				ATAD2	1	Fig2b
				GBA	1	Fig2b
				SPATA7	1	Fig2b
				CASP1	1	Fig2b
				SRPK2	1	Fig2b
				KAZN	1	Fig2b
				GDPD1	1	Fig2b
				CD33	1	Fig2b
				NGRN	1	Fig2b
				PLA2G12A	1	Fig2b
				ETHE1	1	Fig2b
				SLC43A3	1	Fig2b
				ARSD	1	Fig2b
				LOC283194	1	Fig2b
				SDC3	1	Fig2b
				OLFML2A	1	Fig2b
				CCDC112	1	Fig2b
				THOC3	1	Fig2b
				RBP7	1	Fig2b
				MICB.DT	1	Fig2b
				BRD7	1	Fig2b
				LDAH	1	Fig2b
				CAST	1	Fig2b
				MCUR1	1	Fig2b
				LINC00977	1	Fig2b
				HTATSF1P2	1	Fig2b
				GALNT6	1	Fig2b
				HLA.A	1	Fig2b
				RNF135	1	Fig2b
				MELK	1	Fig2b
				DOCK7	1	Fig2b
				CRHBP	1	Fig2b
				IL15	1	Fig2b
				LINC00487	1	Fig2b
				PEX11A	1	Fig2b
				CXCR4	1	Fig2b
				IFNAR2	1	Fig2b
				FAM225A	1	Fig2b
				VSTM1	1	Fig2b
				MAN2A2	1	Fig2b
				F13A1	1	Fig2b
				SLFN12L	1	Fig2b
				SGO2	1	Fig2b
				MICALCL	1	Fig2b
				CHST2	1	Fig2b
				IFI44	1	Fig2b
				VSIG8	1	Fig2b
				LYZ	1	Fig2b
				CD47	1	Fig2b
				HESX1	1	Fig2b
				HOXA1	1	Fig2b
				GDE1	1	Fig2b
				ARHGEF16	1	Fig2b
				CDCA8	1	Fig2b
				C20orf194	1	Fig2b
				CDC6	1	Fig2b
				PDE6D	1	Fig2b
				ATG4C	1	Fig2b
				ZNF436	1	Fig2b
				HSDL2	1	Fig2b
				HIST1H4C	1	Fig2b
				MSR1	1	Fig2b
				NPM2	1	Fig2b
				MS4A1	1	Fig2b
				TNS1	1	Fig2b
				DYRK4	1	Fig2b
				NFE2L3	1	Fig2b
				PRKACB	1	Fig2b
				LOC100287467	1	Fig2b
				PALM2.AKAP2	1	Fig2b
				AHNAK	1	Fig2b
				MOK	1	Fig2b
				FTH1	1	Fig2b
				AKAP2	1	Fig2b
				ABCA1	1	Fig2b
				ZBP1	1	Fig2b
				LRRC20	1	Fig2b
				SOCS1	1	Fig2b
				HYLS1	1	Fig2b
				AP3S2	1	Fig2b
				NCF4	1	Fig2b
				PPIC	1	Fig2b
				TUBB	1	Fig2b
				GABBR1	1	Fig2b
				TPST2	1	Fig2b
				FAM84B	1	Fig2b
				RPS10P7	1	Fig2b
				SNX12	1	Fig2b
				TNNI2	1	Fig2b
				ARHGAP21	1	Fig2b
				GOLIM4	1	Fig2b
				MCUB	1	Fig2b
				MYZAP	1	Fig2b
				SLC38A7	1	Fig2b
				CTSH	1	Fig2b
				CD3E	1	Fig2b
				PDP1	1	Fig2b
				MBOAT1	1	Fig2b
				DDX60	1	Fig2b
				FBXO39	1	Fig2b
				RELL1	1	Fig2b
				CARD8.AS1	1	Fig2b
				FCN1	1	Fig2b
				ICMT	1	Fig2b
				GBP2	1	Fig2b
				CES3	1	Fig2b
				SRGAP3	1	Fig2b
				ATP6V1A	1	Fig2b
				PEG3	1	Fig2b
				KCTD10	1	Fig2b
				MTSS1L	1	Fig2b
				BRSK1	1	Fig2b
				ABRACL	1	Fig2b
				CTD.2201I18.1	1	Fig2b
				IFNGR2	1	Fig2b
				RNF150	1	Fig2b
				GYPE	1	Fig2b
				SLC37A2	1	Fig2b
				SH3BP4	1	Fig2b
				FCGR2A	1	Fig2b
				STX3	1	Fig2b
				OBSCN	1	Fig2b
				DNAJB9	1	Fig2b
				PTGER4	1	Fig2b
				IFIT1	1	Fig2b
				TSKU	1	Fig2b
				MAPK12	1	Fig2b
				ARHGAP15	1	Fig2b
				ITGA9.AS1	1	Fig2b
				BRCA2	1	Fig2b
				CLEC10A	1	Fig2b
				AP2S1	1	Fig2b
				PTTG1	1	Fig2b
				UNC13B	1	Fig2b
				CD52	1	Fig2b
				LOC100507642	1	Fig2b
				CENPBD1	1	Fig2b
				VAT1	1	Fig2b
				DMXL2	1	Fig2b
				SVIL.AS1	1	Fig2b
				PAM	1	Fig2b
				CHID1	1	Fig2b
				ISG20	1	Fig2b
				CENPK	1	Fig2b
				LBX2	1	Fig2b
				PLXDC1	1	Fig2b
				LINC00506	1	Fig2b
				GIMAP7	1	Fig2b
				RAP1GDS1	1	Fig2b
				SH3BP5	1	Fig2b
				LINC01006	1	Fig2b
				WASHC1	1	Fig2b
				JADE1	1	Fig2b
				KIAA0040	1	Fig2b
				HLA.DRA	1	Fig2b
				CLTA	1	Fig2b
				ITGB8	1	Fig2b
				MAX	1	Fig2b
				BTN2A2	1	Fig2b
				EDEM2	1	Fig2b
				CD74	1	Fig2b
				CBX1	1	Fig2b
				NME6	1	Fig2b
				RARRES3	1	Fig2b
				RNASE6	1	Fig2b
				CD81.AS1	1	Fig2b
				SFRP4	1	Fig2b
				SMN2	1	Fig2b
				AKAP6	1	Fig2b
				EIF5A2	1	Fig2b
				CLSPN	1	Fig2b
				SMN1	1	Fig2b
				OCIAD2	1	Fig2b
				SNX20	1	Fig2b
				LOC100419583	1	Fig2b
				IFI27	1	Fig2b
				TCN2	1	Fig2b
				PTGFRN	1	Fig2b
				HIST1H1D	1	Fig2b
				CBR1	1	Fig2b
				PARS2	1	Fig2b
				PLEKHA7	1	Fig2b
				ZFYVE16	1	Fig2b
				MMP24.AS1.EDEM2	1	Fig2b
				RAB9A	1	Fig2b
				MRPL17	1	Fig2b
				FAM124B	1	Fig2b
				RSU1	1	Fig2b
				FAM174B	1	Fig2b
				OAS2	1	Fig2b
				MTRNR2L10	1	Fig2b
				MCU	1	Fig2b
				FRG1DP	1	Fig2b
				TMEM229B	1	Fig2b
				RAVER2	1	Fig2b
				HMMR	1	Fig2b
				CTNS	1	Fig2b
				PCGF2	1	Fig2b
				PRC1	1	Fig2b
				ETV7	1	Fig2b
				P2RY6	1	Fig2b
				PRSS21	1	Fig2b
				AIM2	1	Fig2b
				ALCAM	1	Fig2b
				XAF1	1	Fig2b
				CARD6	1	Fig2b
				INIP	1	Fig2b
				AMOTL2	1	Fig2b
				FN1	1	Fig2b
				LGALS17A	1	Fig2b
				ZNF311	1	Fig2b
				TRIM5	1	Fig2b
				BASP1	1	Fig2b
				BNIP3	1	Fig2b
				SMIM15	1	Fig2b
				STBD1	1	Fig2b
				APOBEC3B	1	Fig2b
				ZNF730	1	Fig2b
				SNRPG	1	Fig2b
				MPP6	1	Fig2b
				SCTR	1	Fig2b
				TEX2	1	Fig2b
				HES4	1	Fig2b
				BTN3A1	1	Fig2b
				NME8	1	Fig2b
				TMEM159	1	Fig2b
				CMAHP	1	Fig2b
				PTMA	1	Fig2b
				UBE2L3	1	Fig2b
				UBE2C	1	Fig2b
				LOC101927699	1	Fig2b
				HLA.DQB2	1	Fig2b
				MYEOV	1	Fig2b
				L3MBTL4.AS1	1	Fig2b
				NAT8B	1	Fig2b
				HEXB	1	Fig2b
				NDUFV2	1	Fig2b
				TCF12	1	Fig2b
				PLEKHF2	1	Fig2b
				LPIN1	1	Fig2b
				SNX10	1	Fig2b
				NTAN1	1	Fig2b
				UBE2L6	1	Fig2b
				NUDT16P1	1	Fig2b
				SLC9A7	1	Fig2b
				MORN4	1	Fig2b
				AKR1A1	1	Fig2b
				CPQ	1	Fig2b
				RAB3IP	1	Fig2b
				NECTIN1	1	Fig2b
				TMEM251	1	Fig2b
				IGSF6	1	Fig2b
				KLF12	1	Fig2b
				NUB1	1	Fig2b
				HLA.C	1	Fig2b
				TMEM71	1	Fig2b
				FUT7	1	Fig2b
				DEPDC1	1	Fig2b
				TXNRD3	1	Fig2b
				IBSP	1	Fig2b
				LINC01504	1	Fig2b
				HLA.DOA	1	Fig2b
				SELL	1	Fig2b
				DCAF12	1	Fig2b
				LINC02067	1	Fig2b
				HASPIN	1	Fig2b
				ZNF613	1	Fig2b
				VWF	1	Fig2b
				ZNF683	1	Fig2b
				NRBF2	1	Fig2b
				KLF11	1	Fig2b
				TRMT5	1	Fig2b
				RPS10	1	Fig2b
				RFK	1	Fig2b
				IL7	1	Fig2b
				THRB	1	Fig2b
				AKR1C2	1	Fig2b
				PDLIM5	1	Fig2b
				KIAA1522	1	Fig2b
				CDC42EP3	1	Fig2b
				AP3S1	1	Fig2b
				SULT1A1	1	Fig2b
				NEK2	1	Fig2b
				CTSL	1	Fig2b
				C5orf56	1	Fig2b
				ATIC	1	Fig2b
				PTGR1	1	Fig2b
				RBL1	1	Fig2b
				NLRP12	1	Fig2b
				MGAT4A	1	Fig2b
				AMIGO2	1	Fig2b
				HJURP	1	Fig2b
				HLA.DMB	1	Fig2b
				HLA.DQA2	1	Fig2b
				TMEM154	1	Fig2b
				AHCYL2	1	Fig2b
				SEC23B	1	Fig2b
				PRTFDC1	1	Fig2b
				SDC4	1	Fig2b
				SHLD2	1	Fig2b
				PDGFRL	1	Fig2b
				MLLT3	1	Fig2b
				FNDC10	1	Fig2b
				SLC1A4	1	Fig2b
				KLRC2	1	Fig2b
				GRN	1	Fig2b
				ATP6V1D	1	Fig2b
				KIF11	1	Fig2b
				APEX2	1	Fig2b
				CD300LF	1	Fig2b
				DOK2	1	Fig2b
				IER3	1	Fig2b
				CDKN3	1	Fig2b
				ZNF101	1	Fig2b
				KNL1	1	Fig2b
				KYNU	1	Fig2b
				LOC101927417	1	Fig2b
				IDH1	1	Fig2b
				S100A6	1	Fig2b
				RPE	1	Fig2b
				SLC12A8	1	Fig2b
				ZNF483	1	Fig2b
				HAPLN3	1	Fig2b
				TOP2A	1	Fig2b
				STAT1	1	Fig2b
				PRDM6	1	Fig2b
				DPRXP4	1	Fig2b
				MIR4253	1	Fig2b
				CDK20	1	Fig2b
				SLC6A12	1	Fig2b
				IRF9	1	Fig2b
				GMPR	1	Fig2b
				PLAC8	1	Fig2b
				SEC22B	1	Fig2b
				EZH2	1	Fig2b
				TSHZ1	1	Fig2b
				PAX8.AS1	1	Fig2b
				S100A10	1	Fig2b
				UTF1	1	Fig2b
				ITGA1	1	Fig2b
				LYRM4.AS1	1	Fig2b
				UCP2	1	Fig2b
				AGPAT4	1	Fig2b
				LGMN	1	Fig2b
				C2orf81	1	Fig2b
				CLEC4A	1	Fig2b
				FLNB.AS1	1	Fig2b
				KIAA1614	1	Fig2b
				CCRL2	1	Fig2b
				ROBO1	1	Fig2b
				ADARB1	1	Fig2b
				CLEC4E	1	Fig2b
				FGFR1OP	1	Fig2b
				CALCR	1	Fig2b
				TTC7B	1	Fig2b
				KBTBD12	3	FIg2e
				PCDHB2	3	FIg2e
				RIMS3	3	FIg2e
				MYO6	3	FIg2e
				DSCAM	3	FIg2e
				KHDRBS3	3	FIg2e
				PCAT7	3	FIg2e
				FOXP2	3	FIg2e
				ST6GALNAC3	3	FIg2e
				COCH	3	FIg2e
				PAQR5	3	FIg2e
				TJP1	3	FIg2e
				MEIS1	3	FIg2e
				CCND2	3	FIg2e
				ZFYVE9	3	FIg2e
				HS3ST4	3	FIg2e
				TMIGD2	3	FIg2e
				RASGEF1C	3	FIg2e
				ANKRD18DP	3	FIg2e
				LINC01141	3	FIg2e
				ZNF711	3	FIg2e
				NEO1	3	FIg2e
				SGCB	3	FIg2e
				SELENBP1	3	FIg2e
				FGL1	3	FIg2e
				AASS	3	FIg2e
				CECR2	3	FIg2e
				TSPAN7	3	FIg2e
				SLC2A5	3	FIg2e
				DHRS9	3	FIg2e
				NEXMIF	3	FIg2e
				LRP6	3	FIg2e
				EGFL7	3	FIg2e
				EFNB2	3	FIg2e
				LRP5	3	FIg2e
				TMEM178B	3	FIg2e
				PLCXD3	3	FIg2e
				WNK3	3	FIg2e
				LOC101928304	3	FIg2e
				PER1	3	FIg2e
				IQCJ.SCHIP1	3	FIg2e
				RAB11FIP5	3	FIg2e
				ADGRG1	3	FIg2e
				ADAMTSL2	3	FIg2e
				DLC1	3	FIg2e
				DOCK6	3	FIg2e
				EMILIN1	3	FIg2e
				SPRY1	3	FIg2e
				NPTXR	3	FIg2e
				BRINP2	3	FIg2e
				SHE	3	FIg2e
				GP9	3	FIg2e
				SHTN1	3	FIg2e
				SMAP2	3	FIg2e
				GIPC3	3	FIg2e
				TBXA2R	3	FIg2e
				IRS2	3	FIg2e
				SLC15A2	3	FIg2e
				APBA2	3	FIg2e
				AMOTL1	3	FIg2e
				AKT3	3	FIg2e
				SYNDIG1	3	FIg2e
				GGT7	3	FIg2e
				SEMA7A	3	FIg2e
				MATK	3	FIg2e
				LINC00537	3	FIg2e
				ARHGAP32	3	FIg2e
				GRASP	3	FIg2e
				PCDHGB6	3	FIg2e
				RBM19	3	FIg2e
				GATA4	3	FIg2e
				ENC1	3	FIg2e
				WASF3	3	FIg2e
				SORL1	3	FIg2e
				LRP1B	3	FIg2e
				FAM166B	3	FIg2e
				IGSF10	3	FIg2e
				CAMK2B	3	FIg2e
				SRGAP2	3	FIg2e
				EMID1	3	FIg2e
				LOC145694	3	FIg2e
				NOS1AP	3	FIg2e
				SLC9A5	3	FIg2e
				EFEMP2	3	FIg2e
				LOC101929563	3	FIg2e
				PNMA8A	3	FIg2e
				RTKN	3	FIg2e
				GLIS3	3	FIg2e
				ASTN1	3	FIg2e
				LINC.PINT	3	FIg2e
				CDC14B	3	FIg2e
				CYTH3	3	FIg2e
				PCDHGA10	3	FIg2e
				GABRA3	3	FIg2e
				PCDHGB7	3	FIg2e
				LRIG1	3	FIg2e
				MMRN1	3	FIg2e
				PURPL	3	FIg2e
				MIGA2	3	FIg2e
				SLC25A37	3	FIg2e
				APOC2	3	FIg2e
				MSLN	3	FIg2e
				GRASP.AS1	3	FIg2e
				ERF	3	FIg2e
				GSTM4	3	FIg2e
				TMEM119	3	FIg2e
				SCHIP1	3	FIg2e
				IGF1R	3	FIg2e
				SETBP1	3	FIg2e
				APOC4.APOC2	3	FIg2e
				CSF1R	3	FIg2e
				SFXN2	3	FIg2e
				ADGRA2	3	FIg2e
				NCKAP1	3	FIg2e
				MCF2L	3	FIg2e
				DNALI1	3	FIg2e
				TSC22D2	3	FIg2e
				ZNF853	3	FIg2e
				TLN2	3	FIg2e
				DOCK3	3	FIg2e
				BHLHE41	3	FIg2e
				SORCS1	3	FIg2e
				NECTIN3	3	FIg2e
				CA8	3	FIg2e
				BCAR3	3	FIg2e
				C3orf70	3	FIg2e
				FAM157A	3	FIg2e
				CDK6	3	FIg2e
				PCDHGC4	3	FIg2e
				ABR	3	FIg2e
				DCLK2	3	FIg2e
				TNIK	3	FIg2e
				SOX4	3	FIg2e
				ACY3	3	FIg2e
				AHCYL1	3	FIg2e
				NBEA	3	FIg2e
				ARMH4	3	FIg2e
				CCDC168	3	FIg2e
				PCDHGC5	3	FIg2e
				CAMSAP1	3	FIg2e
				OSBPL6	3	FIg2e
				SHC1	3	FIg2e
				NAP1L3	3	FIg2e
				EML5	3	FIg2e
				OLR1	3	FIg2e
				MMP28	3	FIg2e
				ALPK3	3	FIg2e
				ARHGEF37	3	FIg2e
				PCDHGB2	3	FIg2e
				ZNF667	3	FIg2e
				PCDHGB1	3	FIg2e
				PCDHGB4	3	FIg2e
				NRBP2	3	FIg2e
				KCNA5	3	FIg2e
				PCDHGA3	3	FIg2e
				PIK3IP1	3	FIg2e
				PCDHGA1	3	FIg2e
				SLC25A25	3	FIg2e
				PCDHGA8	3	FIg2e
				PCDHGA2	3	FIg2e
				PCDHGA4	3	FIg2e
				SCML2	3	FIg2e
				GLDN	3	FIg2e
				CPNE5	3	FIg2e
				SH3TC1	3	FIg2e
				PTPRB	3	FIg2e
				DPP4	3	FIg2e
				PCDHGA5	3	FIg2e
				COL8A2	3	FIg2e
				MIR31HG	3	FIg2e
				HRC	3	FIg2e
				LRIG3	3	FIg2e
				ADAMTS17	3	FIg2e
				PLK3	3	FIg2e
				LOC105372273	3	FIg2e
				PTGER4P2.CDK2AP2P2	3	FIg2e
				JAM3	3	FIg2e
				LAMP5	3	FIg2e
				RALGPS2	3	FIg2e
				PCDHA4	3	FIg2e
				PDE3B	3	FIg2e
				PPM1J	3	FIg2e
				ZNF827	3	FIg2e
				PCDHGA9	3	FIg2e
				NXN	3	FIg2e
				SLC25A27	3	FIg2e
				MEST	3	FIg2e
				LOC399975	3	FIg2e
				TNFRSF13C	3	FIg2e
				GSTM3	3	FIg2e
				LINC01854	3	FIg2e
				TBC1D16	3	FIg2e
				RASSF8	3	FIg2e
				TSPAN5	3	FIg2e
				SPTLC3	3	FIg2e
				PLPP7	3	FIg2e
				PCDHGA7	3	FIg2e
				PALD1	3	FIg2e
				IFNE	3	FIg2e
				ENO4	3	FIg2e
				AMOT	3	FIg2e
				ACKR2	3	FIg2e
				PTCH1	3	FIg2e
				PCDHGA11	3	FIg2e
				SLC22A17	3	FIg2e
				PCDHGA6	3	FIg2e
				MIR3605	3	FIg2e
				CYTH2	3	FIg2e
				ST6GALNAC6	3	FIg2e
				OVOS2	3	FIg2e
				NKX3.1	3	FIg2e
				PCDHGB3	3	FIg2e
				TMEM63C	3	FIg2e
				ALDH5A1	3	FIg2e
				MACROD2	3	FIg2e
				DIP2A	3	FIg2e
				PMS1	3	FIg2e
				CSGALNACT1	3	FIg2e
				PHC2	3	FIg2e
				MIR6737	3	FIg2e
				LRRC66	3	FIg2e
				TRIM46	3	FIg2e
				PLAG1	3	FIg2e
				HHIPL1	3	FIg2e
				RASSF10	3	FIg2e
				DAGLB	3	FIg2e
				ITPRIP	3	FIg2e
				PKDCC	3	FIg2e
				FUT1	3	FIg2e
				ATP8B2	3	FIg2e
				GAREM2	3	FIg2e
				AFDN	3	FIg2e
				XIRP1	3	FIg2e
				HOMER1	3	FIg2e
				ATP9B	3	FIg2e
				PIP5K1B	3	FIg2e
				PABPC4	3	FIg2e
				RASGRP2	3	FIg2e
				TAL1	3	FIg2e
				ADAMTS9	3	FIg2e
				UPF1	3	FIg2e
				CD99L2	3	FIg2e
				IGSF21	3	FIg2e
				SLC37A3	3	FIg2e
				LOC100507346	3	FIg2e
				CKB	3	FIg2e
				LDOC1	3	FIg2e
				FBXL7	3	FIg2e
				FBXO17	3	FIg2e
				FLJ23867	3	FIg2e
				LOC100289656	3	FIg2e
				TESC	3	FIg2e
				NAV3	3	FIg2e
				COL6A4P2	3	FIg2e
				NET1	3	FIg2e
				MOS	3	FIg2e
				LINC00958	3	FIg2e
				ZNF667.AS1	3	FIg2e
				LOC100507156	3	FIg2e
				SMAD3	3	FIg2e
				DLG2	3	FIg2e
				MIR4257	3	FIg2e
				AHDC1	3	FIg2e
				C19orf38	3	FIg2e
				NR4A1	3	FIg2e
				KIAA1211L	3	FIg2e
				DNER	3	FIg2e
				EED	3	FIg2e
				OXER1	3	FIg2e
				SYT3	3	FIg2e
				LHFPL2	3	FIg2e
				TTC28	3	FIg2e
				COQ8B	3	FIg2e
				GPRASP1	3	FIg2e
				PCDHA9	3	FIg2e
				DGKA	3	FIg2e
				LOC100128276	3	FIg2e
				F2R	3	FIg2e
				CDKN2A	3	FIg2e
				ZNF26	3	FIg2e
				PCDHGB5	3	FIg2e
				GGNBP2	3	FIg2e
				SERTAD2	3	FIg2e
				PCDHA11	3	FIg2e
				LINC02317	3	FIg2e
				CMYA5	3	FIg2e
				PTPN13	3	FIg2e
				A2M.AS1	3	FIg2e
				DUOX1	3	FIg2e
				SLC2A10	3	FIg2e
				TPST1	3	FIg2e
				IPCEF1	3	FIg2e
				NAB2	3	FIg2e
				MPDZ	3	FIg2e
				PCDHA10	3	FIg2e
				GSTA4	3	FIg2e
				GDAP1	3	FIg2e
				SEMA6A	3	FIg2e
				RAPGEF1	3	FIg2e
				GRIK5	3	FIg2e
				POFUT1	3	FIg2e
				PCDHAC2	3	FIg2e
				MFSD11	3	FIg2e
				PLCD1	3	FIg2e
				GSTM2	3	FIg2e
				CDKN1A	3	FIg2e
				PCDHAC1	3	FIg2e
				RD3	3	FIg2e
				CNPY4	3	FIg2e
				PDCD6IPP2	3	FIg2e
				TEX30	3	FIg2e
				FAM122B	3	FIg2e
				RNF122	3	FIg2e
				PLXNA2	3	FIg2e
				KIRREL3	3	FIg2e
				LOC101929516	3	FIg2e
				TDRD10	3	FIg2e
				PCLO	3	FIg2e
				MINOS1.NBL1	3	FIg2e
				NBL1	3	FIg2e
				EGR3	3	FIg2e
				WASF2	3	FIg2e
				SDK1	3	FIg2e
				CYP27C1	3	FIg2e
				DACT1	3	FIg2e
				PCDHA7	3	FIg2e
				PIAS3	3	FIg2e
				BCAS4	3	FIg2e
				AMH	3	FIg2e
				CD34	3	FIg2e
				NAA40	3	FIg2e
				B4GALT4	3	FIg2e
				CTTNBP2	3	FIg2e
				LIMD2	3	FIg2e
				PCDHA6	3	FIg2e
				ADAMTS4	3	FIg2e
				RPS6KL1	3	FIg2e
				SKI	3	FIg2e
				LIN28B	3	FIg2e
				GOLGA8M	3	FIg2e
				SIPA1L2	3	FIg2e
				WHAMMP2	3	FIg2e
				PCDHGA12	3	FIg2e
				SLC44A2	3	FIg2e
				SUN1	3	FIg2e
				IRAK3	3	FIg2e
				SNPH	3	FIg2e
				RAP1GAP2	3	FIg2e
				LOC148696	3	FIg2e
				CLSTN1	3	FIg2e
				FOXO1	3	FIg2e
				KCNIP1	3	FIg2e
				B3GNT5	3	FIg2e
				GPSM1	3	FIg2e
				MIPOL1	3	FIg2e
				RPS6KA2	3	FIg2e
				MAGI1	3	FIg2e
				MAGI3	3	FIg2e
				NCK2	3	FIg2e
				FAM163B	3	FIg2e
				FAM160A2	3	FIg2e
				MIR378I	3	FIg2e
				HACD1	3	FIg2e
				SLC12A4	3	FIg2e
				KDM6B	3	FIg2e
				SLIT2	3	FIg2e
				ITPKB	3	FIg2e
				LINC00642	3	FIg2e
				FAM181B	3	FIg2e
				ANXA6	3	FIg2e
				PCDHA12	3	FIg2e
				PCDHA8	3	FIg2e
				KBTBD11	3	FIg2e
				IL13RA1	3	FIg2e
				MAP6D1	3	FIg2e
				ITM2C	3	FIg2e
				LINC00578	3	FIg2e
				PRICKLE2.AS1	3	FIg2e
				METTL7A	3	FIg2e
				MIR29B2CHG	3	FIg2e
				SMYD3	3	FIg2e
				SYCP2L	3	FIg2e
				PCDHA1	3	FIg2e
				CROCC	3	FIg2e
				CAPNS2	3	FIg2e
				PNPLA2	3	FIg2e
				PCDHA13	3	FIg2e
				HAAO	3	FIg2e
				ANGPTL8	3	FIg2e
				CEP126	3	FIg2e
				PSORS1C3	3	FIg2e
				LCAT	3	FIg2e
				SUSD6	3	FIg2e
				C1orf226	3	FIg2e
				USP2	3	FIg2e
				GDF11	3	FIg2e
				CLN8	3	FIg2e
				APBA1	3	FIg2e
				PATZ1	3	FIg2e
				COL7A1	3	FIg2e
				PCDHA3	3	FIg2e
				CCND2.AS1	3	FIg2e
				ZCCHC12	3	FIg2e
				SMURF1	3	FIg2e
				TIAM1	3	FIg2e
				RASSF8.AS1	3	FIg2e
				BCAR1	3	FIg2e
				KIAA1211	3	FIg2e
				TENM4	3	FIg2e
				TEK	3	FIg2e
				PDK4	3	FIg2e
				TSPAN14	3	FIg2e
				PCDHB3	3	FIg2e
				S100B	3	FIg2e
				ZNF300	3	FIg2e
				PCDHA2	3	FIg2e
				PLPP1	3	FIg2e
				ZNF333	3	FIg2e
				PPP6R2	3	FIg2e
				YES1	3	FIg2e
				STAT5B	3	FIg2e
				PRKAG2.AS1	3	FIg2e
				LRRC36	3	FIg2e
				KCNC3	3	FIg2e
				KRTAP5.9	3	FIg2e
				TMC7	3	FIg2e
				CITED4	3	FIg2e
				CSRNP1	3	FIg2e
				CLSTN3	3	FIg2e
				RASA3	3	FIg2e
				MTCL1	3	FIg2e
				CLDN3	3	FIg2e
				HES6	3	FIg2e
				SSBP2	3	FIg2e
				KANK2	3	FIg2e
				CEP68	3	FIg2e
				NFKBID	3	FIg2e
				CCDC40	3	FIg2e
				INHBA	3	FIg2e
				KIF21B	3	FIg2e
				CRTC2	3	FIg2e
				CTLA4	3	FIg2e
				LY6G5B	3	FIg2e
				LOC101928058	3	FIg2e
				FLJ34503	3	FIg2e
				RAF1	3	FIg2e
				SPATA18	3	FIg2e
				VSIR	3	FIg2e
				PIH1D1	3	FIg2e
				LINC01002	3	FIg2e
				GALNT2	3	FIg2e
				PCIF1	3	FIg2e
				MPZL1	3	FIg2e
				ACOX3	3	FIg2e
				PTPN18	3	FIg2e
				LINC01529	3	FIg2e
				GPR132	3	FIg2e
				SLC9A8	3	FIg2e
				SLC37A1	3	FIg2e
				TNPO2	3	FIg2e
				OLFM2	3	FIg2e
				INTS10	3	FIg2e
				CSNK1G2	3	FIg2e
				GSTM2P1	3	FIg2e
				PTPN14	3	FIg2e
				USP11	3	FIg2e
				LMBR1L	3	FIg2e
				POLE	3	FIg2e
				SHMT1	3	FIg2e
				VPS37B	3	FIg2e
				SLC9A3.AS1	3	FIg2e
				ZNF385C	3	FIg2e
				ABCC4	3	FIg2e
				CDK9	3	FIg2e
				KCP	3	FIg2e
				SNCA	3	FIg2e
				USP4	3	FIg2e
				SLC25A29	3	FIg2e
				PIEZO1	3	FIg2e
				THUMPD2	3	FIg2e
				LOC105377342	3	FIg2e
				ZFPM2.AS1	3	FIg2e
				MXD4	3	FIg2e
				SKIDA1	3	FIg2e
				GLT1D1	3	FIg2e
				PCDH18	3	FIg2e
				TPM1	3	FIg2e
				IGFBP3	3	FIg2e
				UBE2E4P	3	FIg2e
				C1RL	3	FIg2e
				RAMP1	3	FIg2e
				MAST3	3	FIg2e
				RAB39B	3	FIg2e
				CHKA	3	FIg2e
				C19orf71	3	FIg2e
				KLF3.AS1	3	FIg2e
				RUSC2	3	FIg2e
				MIR503HG	3	FIg2e
				VAMP2	3	FIg2e
				EPOR	3	FIg2e
				KLHL18	3	FIg2e
				DOC2GP	3	FIg2e
				SGSM1	3	FIg2e
				KCTD19	3	FIg2e
				KRTAP5.8	3	FIg2e
				TMEM132E	3	FIg2e
				PPP1R10	3	FIg2e
				MIR600HG	3	FIg2e
				WDR91	3	FIg2e
				NUP62CL	3	FIg2e
				PRKAG2	3	FIg2e
				SRSF2	3	FIg2e
				PELI2	3	FIg2e
				ORMDL3	3	FIg2e
				SLAIN1	3	FIg2e
				LPCAT2	3	FIg2e
				TTC9	3	FIg2e
				RINL	3	FIg2e
				LOC100130298	3	FIg2e
				VCL	3	FIg2e
				UPF3B	3	FIg2e
				PCDHA5	3	FIg2e
				LIG1	3	FIg2e
				TMEM236	3	FIg2e
				FRMD4A	3	FIg2e
				IDI2.AS1	3	FIg2e
				PAN3	3	FIg2e
				ANKS6	3	FIg2e
				RAB28	3	FIg2e
				CELF2	3	FIg2e
				CYP2T1P	3	FIg2e
				ING5	3	FIg2e
				PADI1	3	FIg2e
				STRN3	3	FIg2e
				MAPK10	3	FIg2e
				ZNF846	3	FIg2e
				RAB40C	3	FIg2e
				PROX1	3	FIg2e
				AP4M1	3	FIg2e
				ELOVL6	3	FIg2e
				CD3EAP	3	FIg2e
				PLPPR2	3	FIg2e
				OSM	3	FIg2e
				SPNS2	3	FIg2e
				IRAK2	3	FIg2e
				LINC01770	3	FIg2e
				SNORD139	3	FIg2e
				LY75	3	FIg2e
				TNKS1BP1	3	FIg2e
				ERCC3	3	FIg2e
				ADAMTS6	3	FIg2e
				MAP4K4	3	FIg2e
				DLST	3	FIg2e
				GUCY1A1	3	FIg2e
				ABCB9	3	FIg2e
				CNGA1	3	FIg2e
				FHOD1	3	FIg2e
				PCDHB9	3	FIg2e
				PDPN	3	FIg2e
				C1RL.AS1	3	FIg2e
				NT5C	3	FIg2e
				MOCS1	3	FIg2e
				MICALL2	3	FIg2e
				ZDHHC3	3	FIg2e
				COPG2IT1	3	FIg2e
				LYST	3	FIg2e
				FAM149A	3	FIg2e
				KHNYN	3	FIg2e
				GABRB2	3	FIg2e
				LOC100289580	3	FIg2e
				COL9A2	3	FIg2e
				NFAM1	3	FIg2e
				LOC100128882	3	FIg2e
				PRICKLE2	3	FIg2e
				STK17A	3	FIg2e
				SFXN5	3	FIg2e
				LOC100288123	3	FIg2e
				MYL9	3	FIg2e
				DOLK	3	FIg2e
				SLC27A3	3	FIg2e
				HSD17B6	3	FIg2e
				NOTUM	3	FIg2e
				CARD14	3	FIg2e
				SYCE2	3	FIg2e
				FBXO27	3	FIg2e
				ASB1	3	FIg2e
				POMGNT1	3	FIg2e
				GNG7	3	FIg2e
				BEX5	3	FIg2e
				ARHGEF10	3	FIg2e
				SNORA67	3	FIg2e
				ZFPM2	3	FIg2e
				LRRC56	3	FIg2e
				TANC1	3	FIg2e
				WDR37	3	FIg2e
				ISM2	3	FIg2e
				ABCA3	3	FIg2e
				SEMA6A.AS1	3	FIg2e
				FAR2P2	3	FIg2e
				GAS2L2	3	FIg2e
				ZNF204P	3	FIg2e
				BTBD19	3	FIg2e
				MLLT1	3	FIg2e
				CORO6	3	FIg2e
				TNS2	3	FIg2e
				TMEM74	3	FIg2e
				KBTBD8	3	FIg2e
				TRAPPC9	3	FIg2e
				ACTG1P20	3	FIg2e
				RGL3	3	FIg2e
				NHSL1	3	FIg2e
				LOC102723385	3	FIg2e
				BCL2L2	3	FIg2e
				TSSK6	3	FIg2e
				LOC729683	3	FIg2e
				HNRNPA0	3	FIg2e
				TMIGD3	3	FIg2e
				ADGRL1	3	FIg2e
				TRAF4	3	FIg2e
				SF1	3	FIg2e
				JAM2	3	FIg2e
				MAPK9	3	FIg2e
				PHKA1	3	FIg2e
				BCAS1	3	FIg2e
				ADD1	3	FIg2e
				SHROOM1	3	FIg2e
				C12orf56	3	FIg2e
				KIAA1324L	3	FIg2e
				MED12L	3	FIg2e
				PKD2	3	FIg2e
				WHAMMP3	3	FIg2e
				KRTAP5.10	3	FIg2e
				CDH23	3	FIg2e
				IFNGR1	3	FIg2e
				MEP1A	3	FIg2e
				LOC155060	3	FIg2e
				NRCAM	3	FIg2e
				PCBP3	3	FIg2e
				PCDHB4	3	FIg2e
				MTA3	3	FIg2e
				ZNF783	3	FIg2e
				RECK	3	FIg2e
				SORT1	3	FIg2e
				INTU	3	FIg2e
				LOC100128108	3	FIg2e
				AP3M2	3	FIg2e
				CEACAM21	3	FIg2e
				HSPB8	3	FIg2e
				PAQR6	3	FIg2e
				CTDSP2	3	FIg2e
				IPO5P1	3	FIg2e
				ARRDC5	3	FIg2e
				LHFPL1	3	FIg2e
				NCKAP5	3	FIg2e
				CKAP4	3	FIg2e
				GATAD2B	3	FIg2e
				ADAMTS10	3	FIg2e
				C20orf27	3	FIg2e
				TGIF2	3	FIg2e
				NOL9	3	FIg2e
				AFAP1	3	FIg2e
				PACS2	3	FIg2e
				MLXIP	3	FIg2e
				PEX5	3	FIg2e
				RAPGEF2	3	FIg2e
				FRAT1	3	FIg2e
				CCL22	3	FIg2e
				CX3CL1	3	FIg2e
				HIC2	3	FIg2e
				YKT6	3	FIg2e
				PLVAP	3	FIg2e
				FAM214B	3	FIg2e
				NPR2	3	FIg2e
				KLF2	3	FIg2e
				ADRB1	3	FIg2e
				PLAT	3	FIg2e
				CHIC1	3	FIg2e
				LYNX1	3	FIg2e
				MDM2	3	FIg2e
				POLM	3	FIg2e
				PURA	3	FIg2e
				ZNF391	3	FIg2e
				LINC01091	3	FIg2e
				PGAM2	3	FIg2e
				TGFBRAP1	3	FIg2e
				KDM4B	3	FIg2e
				MMP19	3	FIg2e
				KBTBD11.OT1	3	FIg2e
				ITPKC	3	FIg2e
				HABP4	3	FIg2e
				ZDBF2	3	FIg2e
				SBF1	3	FIg2e
				ERCC1	3	FIg2e
				CACTIN.AS1	3	FIg2e
				HECA	3	FIg2e
				RAB3D	3	FIg2e
				VAV2	3	FIg2e
				RNF216	3	FIg2e
				PRRT3.AS1	3	FIg2e
				SHC3	3	FIg2e
				ARRDC2	3	FIg2e
				LOC100131604	3	FIg2e
				LINC00641	3	FIg2e
				SSPO	3	FIg2e
				TRPM4	3	FIg2e
				FLOT2	3	FIg2e
				USP22	3	FIg2e
				FBXO31	3	FIg2e
				HNRNPDL	3	FIg2e
				ZNF251	3	FIg2e
				SYDE1	3	FIg2e
				ARSG	3	FIg2e
				FGD2	3	FIg2e
				NCS1	3	FIg2e
				ADRB2	3	FIg2e
				PHYHD1	3	FIg2e
				ZSCAN23	3	FIg2e
				IRF5	3	FIg2e
				LDLR	3	FIg2e
				LOC101928126	3	FIg2e
				TRPC4AP	3	FIg2e
				MTCH1	3	FIg2e
				TMEM259	3	FIg2e
				QRICH1	3	FIg2e
				PIGO	3	FIg2e
				RAD54L2	3	FIg2e
				C11orf95	3	FIg2e
				ABCB11	3	FIg2e
				ALDH16A1	3	FIg2e
				LOC101929719	3	FIg2e
				LINC00484	3	FIg2e
				EGR1	3	FIg2e
				FPGS	3	FIg2e
				PPP1R3G	3	FIg2e
				PARM1	3	FIg2e
				AIRE	3	FIg2e
				LOC101928437	3	FIg2e
				PFN2	3	FIg2e
				PLEKHG1	3	FIg2e
				C1orf115	3	FIg2e
				BICC1	3	FIg2e
				SEC14L1P1	3	FIg2e
				PRNCR1	3	FIg2e
				CGN	3	FIg2e
				EML4	3	FIg2e
				BEND5	3	FIg2e
				DHX30	3	FIg2e
				TRIM72	3	FIg2e
				KCNMB2.AS1	3	FIg2e
				MTMR3	3	FIg2e
				GSN.AS1	3	FIg2e
				ABCG2	3	FIg2e
				RPPH1	3	FIg2e
				MIR6787	3	FIg2e
				CPSF1	3	FIg2e
				NUMBL	3	FIg2e
				POLN	3	FIg2e
				LOC100507373	3	FIg2e
				IMPG1	3	FIg2e
				LINC01160	3	FIg2e
				LYL1	3	FIg2e
				CACTIN	3	FIg2e
				ATOH8	3	FIg2e
				MIR6502	3	FIg2e
				SUCNR1	3	FIg2e
				PLEKHG4	3	FIg2e
				STK35	3	FIg2e
				FSTL4	3	FIg2e
				PRKD3	3	FIg2e
				LOC101928000	3	FIg2e
				DUSP15	3	FIg2e
				AKT2	3	FIg2e
				NFIX	3	FIg2e
				LYPD1	3	FIg2e
				SLC41A3	3	FIg2e
				UQCC1	3	FIg2e
				OXGR1	3	FIg2e
				MECP2	3	FIg2e
				PRDM11	3	FIg2e
				ENTPD4	3	FIg2e
				ANKLE2	3	FIg2e
				PRPF8	3	FIg2e
				SLC38A10	3	FIg2e
				C4orf19	3	FIg2e
				CLUHP3	3	FIg2e
				PRRC2B	3	FIg2e
				POLG	3	FIg2e
				PPP3CB	3	FIg2e
				MSL1	3	FIg2e
				VWA1	3	FIg2e
				DOK1	3	FIg2e
				ADI1	3	FIg2e
				NUDT3	3	FIg2e
				NAT8L	3	FIg2e
				RCOR2	3	FIg2e
				MAGED2	3	FIg2e
				ARRDC1	3	FIg2e
				REXO1	3	FIg2e
				TGFBR2	3	FIg2e
				IDI1	3	FIg2e
				MNT	3	FIg2e
				TP53I13	3	FIg2e
				WDFY2	3	FIg2e
				LINC01010	3	FIg2e
				ZMAT3	3	FIg2e
				HGSNAT	3	FIg2e
				LOC105375218	3	FIg2e
				FAM168B	3	FIg2e
				DIP2A.IT1	3	FIg2e
				SAP30	3	FIg2e
				SLC18A1	3	FIg2e
				ACTN2	3	FIg2e
				NOTCH4	3	FIg2e
				EPM2A	3	FIg2e
				BRAT1	3	FIg2e
				EML3	3	FIg2e
				NUDT16	3	FIg2e
				PIP4K2B	3	FIg2e
				CELF1	3	FIg2e
				SPG7	3	FIg2e
				LOC101927497	3	FIg2e
				PRRT3	3	FIg2e
				SIPA1	3	FIg2e
				PIGL	3	FIg2e
				LAMP1	3	FIg2e
				GTF3C2	3	FIg2e
				DTX2	3	FIg2e
				RPA4	3	FIg2e
				OLFM4	3	FIg2e
				NEAT1	3	FIg2e
				ATP6V1G2.DDX39B	3	FIg2e
				PTPRG	3	FIg2e
				DDX39B	3	FIg2e
				LOC101929798	3	FIg2e
				ARGLU1	3	FIg2e
				LOC100129534	3	FIg2e
				GLI4	3	FIg2e
				FGD1	3	FIg2e
				ASXL1	3	FIg2e
				MORN1	3	FIg2e
				RNF138P1	3	FIg2e
				PNKP	3	FIg2e
				MEIS3P1	3	FIg2e
				MAN1A1	3	FIg2e
				ADNP2	3	FIg2e
				CBX6	3	FIg2e
				TEX9	3	FIg2e
				ZNF608	3	FIg2e
				CTGF	3	FIg2e
				VPS51	3	FIg2e
				CCDC84	3	FIg2e
				RFX3	3	FIg2e
				GAK	3	FIg2e
				SRSF11	3	FIg2e
				FUS	3	FIg2e
				PTK2	3	FIg2e
				TMEM108	3	FIg2e
				DLEC1	3	FIg2e
				EXTL3	3	FIg2e
				RILPL1	3	FIg2e
				PURG	3	FIg2e
				MC1R	3	FIg2e
				C16orf58	3	FIg2e
				RIN2	3	FIg2e
				LOC101928120	3	FIg2e
				OXR1	3	FIg2e
				SLC36A4	3	FIg2e
				RABEP2	3	FIg2e
				ARHGEF9	3	FIg2e
				NLRP3	3	FIg2e
				LOC100129046	3	FIg2e
				EIF4A3	3	FIg2e
				ORMDL1	3	FIg2e
				NIPAL1	3	FIg2e
				LOC103344931	3	FIg2e
				ATP7B	3	FIg2e
				RNF103	3	FIg2e
				POFUT2	3	FIg2e
				SLC29A2	3	FIg2e
				BAP1	3	FIg2e
				LINC00893	3	FIg2e
				CHCHD7	3	FIg2e
				LRRK1	3	FIg2e
				LINGO3	3	FIg2e
				RBM33	3	FIg2e
				DKFZP586I1420	3	FIg2e
				DCAF6	3	FIg2e
				NAA20	3	FIg2e
				SIRT1	3	FIg2e
				UBE2O	3	FIg2e
				CDK13	3	FIg2e
				PTCSC1	3	FIg2e
				LINC00649	3	FIg2e
				REPS1	3	FIg2e
				FNBP4	3	FIg2e
				BAHD1	3	FIg2e
				TOX	3	FIg2e
				WWC2	3	FIg2e
				LINC01410	3	FIg2e
				PDRG1	3	FIg2e
				ARMCX4	3	FIg2e
				SNORD153	3	FIg2e
				TUBGCP6	3	FIg2e
				C16orf72	3	FIg2e
				DENND5B	3	FIg2e
				MYOZ1	3	FIg2e
				LOC100268168	3	FIg2e
				IL6R	3	FIg2e
				PINLYP	3	FIg2e
				OGA	3	FIg2e
				VAPB	3	FIg2e
				SOX9	3	FIg2e
				LOC101928143	3	FIg2e
				PHF13	3	FIg2e
				GNL1	3	FIg2e
				MYO15B	3	FIg2e
				GMEB2	3	FIg2e
				CDH10	3	FIg2e
				SFSWAP	3	FIg2e
				TFPI	3	FIg2e
				DLL1	3	FIg2e
				EPS8L3	3	FIg2e
				PLXNA3	3	FIg2e
				SNORD84	3	FIg2e
				NDUFAF7	3	FIg2e
				TRAF5	3	FIg2e
				RPS6KA1	3	FIg2e
				TCEA2	3	FIg2e
				EXD3	3	FIg2e
				LOC100506548	3	FIg2e
				SLC28A1	3	FIg2e
				SERPINF1	3	FIg2e
				DNAJC18	3	FIg2e
				MALINC1	3	FIg2e
				C1QTNF3	3	FIg2e
				FOXK1	3	FIg2e
				ANKMY1	3	FIg2e
				MARK2	3	FIg2e
				RUNX1	3	FIg2e
				LRRC14	3	FIg2e
				AGO4	3	FIg2e
				ANKRD44	3	FIg2e
[truncated: 288 more rows]

## Sheet: 1.3 Fig2c_metascape
Table 1.3	Fig2c_metascape
GroupID	Category	Term	Description	LogP	Log(q-value)	Genes	Symbols	InTerm_InList
1_Summary	GO Biological Processes	GO:0045087	innate immune response	-26.0204	-21.6755	104,301,384,558,575,710,834,912,923,929,961,972,1536,1612,2219,2317,2633,2634,2635,3429,3433,3434,3454,3455,3460,3627,3669,3821,3822,3902,3958,4210,4939,5052,6039,6352,6355,6584,6733,6772,7431,8542,8764,8876,8942,9051,9076,9246,9258,9447,9582,9830,10133,10462,11027,22914,23052,23098,23586,26253,30835,50856,51191,51667,54809,55601,56907,57823,64135,66005,81030,81035,84243,84282,85363,93082,114836,…	ADARB1,ANXA1,ARG2,AXL,ADGRB1,SERPING1,CASP1,CD1D,CD6,CD14,CD47,CD74,CYBB,DAPK1,FCN1,FLNB,GBP1,GBP2,GBP3,IFI27,IFIT2,IFIT1,IFNAR1,IFNAR2,IFNGR2,CXCL10,ISG20,KLRC1,KLRC2,LAG3,LGALS3,MEFV,OAS2,PRDX1,RNASE6,CCL5,CCL8,SLC22A5,SRPK2,STAT1,VIM,APOL1,TNFRSF14,VNN1,KYNU,PSTPIP1,CLDN1,UBE2L6,MFHAS1,AIM2,APOBEC3B,TRIM14,OPTN,CLEC10A,LILRA2,KLRK1,ENDOD1,SARM1,RIGI,CLEC4E,CD209,CLEC4A,HERC5,NUB1,SAMD9,DDX60,S…	117/-
2_Summary	GO Biological Processes	GO:0050865	regulation of cell activation	-20.0603	-16.0165	196,301,384,430,558,596,864,912,916,923,928,940,941,945,952,961,972,1840,1845,2048,2335,2729,2896,3559,3574,3586,3600,3620,3662,3821,3822,3902,3956,3958,4192,4254,4323,5618,5914,6352,6385,6461,6708,7006,7294,8651,8764,8876,9258,9840,10062,10288,10385,10451,10457,10673,10859,10875,11027,11221,22914,26191,29117,30835,50848,54537,56253,56833,84034,146722,257101,353376,353514,960,2529,2650,3676,6387,…	AHR,ANXA1,ARG2,ASCL2,AXL,BCL2,RUNX3,CD1D,CD3E,CD6,CD9,CD28,CD80,CD33,CD38,CD47,CD74,DTX1,DUSP3,EPHB2,FN1,GCLC,GRN,IL2RA,IL7,IL10,IL15,IDO1,IRF4,KLRC1,KLRC2,LAG3,LGALS1,LGALS3,MDK,KITLG,MMP14,PRLR,RARA,CCL5,SDC4,SHB,SPTA1,TEC,TXK,SOCS1,TNFRSF14,VNN1,MFHAS1,TESPA1,NR1H3,LILRB2,BTN2A2,VAV3,GPNMB,TNFSF13B,LILRB1,FGL2,LILRA2,DUSP10,KLRK1,PTPN22,BRD7,CD209,F11R,SHLD2,CRTAM,SLAMF8,EMILIN2,CD300LF,ZNF683…	130/-
3_Summary	GO Biological Processes	GO:0002831	regulation of response to biotic stimulus	-18.1705	-14.3027	196,330,384,710,834,912,929,1612,2099,2219,2634,2896,3600,3662,3805,3821,3822,3902,4210,4321,6352,6772,7294,9258,9447,10062,10133,10225,10859,10875,11027,11221,22914,23098,23151,23220,23328,23586,23705,26191,26253,51191,51752,55601,56253,56833,64135,81030,81035,84034,84243,84282,85363,114769,114836,115362,117854,144811,146722,153090,353376,388325,653361,940,961,972,1235,1901,3579,3620,3627,3956,4…	AHR,BIRC3,ARG2,SERPING1,CASP1,CD1D,CD14,DAPK1,ESR1,FCN1,GBP2,GRN,IL15,IRF4,KIR2DL4,KLRC1,KLRC2,LAG3,MEFV,MMP12,CCL5,STAT1,TXK,MFHAS1,AIM2,NR1H3,OPTN,CD96,LILRB1,FGL2,LILRA2,DUSP10,KLRK1,SARM1,GRAMD4,DTX4,SASH1,RIGI,CADM1,PTPN22,CLEC4E,HERC5,ERAP1,DDX60,CRTAM,SLAMF8,IFIH1,ZBP1,COLEC12,EMILIN2,ZDHHC18,RNF135,TRIM5,CARD16,SLAMF6,GBP5,TRIM6,LACC1,CD300LF,DAB2IP,TICAM2,SCIMP,NCF1,CD28,CD47,CD74,CCR6,S…	129/-
4_Summary	GO Biological Processes	GO:0045321	leukocyte activation	-16.3808	-12.9901	301,430,558,596,912,916,923,931,940,941,952,960,972,1235,1514,1840,2048,2146,2529,2629,2896,3460,3559,3574,3579,3586,3600,3620,3662,3676,3696,3821,3902,3956,4189,4192,4254,5052,5734,6352,6461,7855,9840,9935,10397,10673,10859,10875,11027,11119,22914,22918,25853,26191,26253,50856,56253,56833,57823,64218,64784,114836,116071,161145,202309,928,1465,3627,5912,7450,9590,10451,87,302,675,799,864,2034,223…	ANXA1,ASCL2,AXL,BCL2,CD1D,CD3E,CD6,MS4A1,CD28,CD80,CD38,CD44,CD74,CCR6,CTSL,DTX1,EPHB2,EZH2,FUT7,GBA1,GRN,IFNGR2,IL2RA,IL7,CXCR2,IL10,IL15,IDO1,IRF4,ITGA4,ITGB8,KLRC1,LAG3,LGALS1,DNAJB9,MDK,KITLG,PRDX1,PTGER4,CCL5,SHB,FZD5,TESPA1,MAFB,NDRG1,TNFSF13B,LILRB1,FGL2,LILRA2,BTN3A1,KLRK1,CD93,DCAF12,PTPN22,CLEC4E,CLEC4A,CRTAM,SLAMF8,SLAMF7,SEMA4A,CRTC3,SLAMF6,BATF2,TMEM229B,GAPT,CD9,CSRP1,CXCL10,RAP2B,V…	97/-
5_Summary	Reactome Gene Sets	R-HSA-1280218	Adaptive Immune System	-15.8137	-12.5102	912,916,929,940,941,945,972,991,1062,1175,1211,1509,1512,1514,1536,2533,3676,3805,3821,3832,3902,4689,5567,5641,5698,6402,6614,7314,7332,8651,8655,8764,8905,9246,9398,9554,9976,10112,10225,10288,10384,10385,10533,10859,10990,11024,11027,11059,11065,11118,11119,22914,25780,25847,26191,30835,51191,51348,51752,56253,56992,57823,64167,64750,81035,81930,90293,114836,114876,131450,146722,342510,353514,…	CD1D,CD3E,CD14,CD28,CD80,CD33,CD74,CDC20,CENPE,AP2S1,CLTA,CTSD,CTSH,CTSL,CYBB,FYB1,ITGA4,KIR2DL4,KLRC1,KIF11,LAG3,NCF4,PRKACB,LGMN,PSMB9,SELL,SIGLEC1,UBB,UBE2L3,SOCS1,DYNLL1,TNFRSF14,AP1S2,UBE2L6,CD101,SEC22B,CLEC2B,KIF20A,CD96,LILRB2,BTN3A3,BTN2A2,ATG7,LILRB1,LILRB5,LILRA1,LILRA2,WWP1,UBE2C,BTN3A2,BTN3A1,KLRK1,RASGRP3,ANAPC13,PTPN22,CD209,HERC5,KLRF1,ERAP1,CRTAM,KIF15,SLAMF7,ERAP2,SMURF2,COLEC12…	74/-
6_Summary	GO Biological Processes	GO:0009617	response to bacterium	-15.4902	-12.3214	19,54,196,558,575,664,834,840,912,923,929,931,941,968,1910,2048,2633,2634,2635,2919,2921,3454,3586,3620,3627,4069,4283,4939,5618,5734,5914,6035,6039,6373,6584,7431,7855,8564,8764,8792,9076,9516,9590,10062,10133,10225,10288,10561,10859,11145,11221,22914,26191,26253,26503,51316,51752,55026,55603,56833,81035,114769,115361,115362,117854,132299,153090,161145,219972,353376,388325,301,1374,1393,1646,209…	ABCA1,ACP5,AHR,AXL,ADGRB1,BNIP3,CASP1,CASP7,CD1D,CD6,CD14,MS4A1,CD80,CD68,EDNRB,EPHB2,GBP1,GBP2,GBP3,CXCL1,CXCL3,IFNAR1,IL10,IDO1,CXCL10,LYZ,CXCL9,OAS2,PRLR,PTGER4,RARA,RNASE1,RNASE6,CXCL11,SLC22A5,VIM,FZD5,KMO,TNFRSF14,TNFRSF11A,CLDN1,LITAF,AKAP12,NR1H3,OPTN,CD96,LILRB2,IFI44,LILRB1,PLAAT3,DUSP10,KLRK1,PTPN22,CLEC4E,SLC17A5,PLAC8,ERAP1,TMEM255A,TENT5A,SLAMF8,COLEC12,CARD16,GBP4,GBP5,TRIM6,OCIAD2…	82/-
7_Summary	GO Biological Processes	GO:0002697	regulation of immune effector process	-15.2329	-12.0921	54,196,301,430,558,710,912,940,941,972,1379,2048,2219,2529,2896,3586,3662,3805,3821,3822,3902,3958,4189,5914,6461,7042,7855,8764,9516,10225,10859,10875,11221,22914,23586,23705,51704,54537,55601,56253,56833,114836,117854,144811,163486,257101,353376,388325,653361,10673	ACP5,AHR,ANXA1,ASCL2,AXL,SERPING1,CD1D,CD28,CD80,CD74,CR1L,EPHB2,FCN1,FUT7,GRN,IL10,IRF4,KIR2DL4,KLRC1,KLRC2,LAG3,LGALS3,DNAJB9,RARA,SHB,TGFB2,FZD5,TNFRSF14,LITAF,CD96,LILRB1,FGL2,DUSP10,KLRK1,RIGI,CADM1,GPRC5B,SHLD2,DDX60,CRTAM,SLAMF8,SLAMF6,TRIM6,LACC1,DENND1B,ZNF683,TICAM2,SCIMP,NCF1,TNFSF13B	50/-
8_Summary	GO Biological Processes	GO:0071345	cellular response to cytokine stimulus	-15.1532	-12.0387	19,330,471,558,834,960,961,972,1235,1393,1612,1840,2317,2629,2633,2634,2635,2919,2921,3429,3434,3454,3455,3460,3559,3560,3574,3579,3600,3627,3676,4283,4904,4939,5603,5618,6352,6355,6373,6387,6772,7431,7852,8564,8651,8764,8792,8828,9034,9076,9447,9472,9590,9705,10288,10673,10859,11024,11027,22808,29887,57007,64135,91662,115361,115362,117854,146722,153090,285180,353514,196,891,916,929,1509,1514,233…	ABCA1,BIRC3,ATIC,AXL,CASP1,CD44,CD47,CD74,CCR6,CRHBP,DAPK1,DTX1,FLNB,GBA1,GBP1,GBP2,GBP3,CXCL1,CXCL3,IFI27,IFIT1,IFNAR1,IFNAR2,IFNGR2,IL2RA,IL2RB,IL7,CXCR2,IL15,CXCL10,ITGA4,CXCL9,YBX1,OAS2,MAPK13,PRLR,CCL5,CCL8,CXCL11,CXCL12,STAT1,VIM,CXCR4,KMO,SOCS1,TNFRSF14,TNFRSF11A,NRP2,CCRL2,CLDN1,AIM2,AKAP6,AKAP12,ST18,LILRB2,TNFSF13B,LILRB1,LILRA1,LILRA2,MRAS,SNX10,ACKR3,IFIH1,NLRP12,GBP4,GBP5,TRIM6,CD300…	89/-
9_Summary	Canonical Pathways	M5885	NABA MATRISOME ASSOCIATED	-11.3357	-8.66285	301,302,710,1393,1509,1512,1514,2162,2219,2239,2919,2921,3082,3574,3586,3600,3627,3956,3958,4192,4254,4283,4321,4322,4323,4324,5328,5361,6275,6277,6281,6352,6355,6373,6383,6385,6387,6424,6768,7042,7062,8743,8974,9672,9966,9976,10154,10462,10505,10509,10673,26253,27151,27299,30835,50856,51267,57125,64218,81035,85329,135228,165530,388697	ANXA1,ANXA2,SERPING1,CRHBP,CTSD,CTSH,CTSL,F13A1,FCN1,GPC4,CXCL1,CXCL3,HGF,IL7,IL10,IL15,CXCL10,LGALS1,LGALS3,MDK,KITLG,CXCL9,MMP12,MMP13,MMP14,MMP15,PLAU,PLXNA1,S100A4,S100A6,S100A10,CCL5,CCL8,CXCL11,SDC2,SDC4,CXCL12,SFRP4,ST14,TGFB2,TCHH,TNFSF10,P4HA2,SDC3,TNFSF15,CLEC2B,PLXNC1,CLEC10A,SEMA4F,SEMA4B,TNFSF13B,CLEC4E,CPAMD8,ADAMDEC1,CD209,CLEC4A,CLEC1A,PLXDC1,SEMA4A,COLEC12,LGALS12,CD109,CLEC4F,HR…	64/-
10_Summary	GO Biological Processes	GO:0050900	leukocyte migration	-11.1413	-8.49534	301,1235,1901,1910,2529,2629,2650,2919,2921,3579,3586,3627,3672,3676,3958,4192,4254,4283,5175,5800,6352,6355,6373,6402,7042,7852,8792,10451,50848,56253,56833,91662,255231,2359,3082,5328,6091,6275,6387,8828,8829,9034,10457,10505,10509,27237,57007,64218,113540,3433,3454,3455,3902,6772,23586,3559,3560,8743,8764,94,3460,3574,3600,5618,9966,10673,768211,747,799,1393,1894,2015,2335,2550,2791,2911,3269,…	ANXA1,CCR6,S1PR1,EDNRB,FUT7,GBA1,GCNT1,CXCL1,CXCL3,CXCR2,IL10,CXCL10,ITGA1,ITGA4,LGALS3,MDK,KITLG,CXCL9,PECAM1,PTPRO,CCL5,CCL8,CXCL11,SELL,TGFB2,CXCR4,TNFRSF11A,VAV3,F11R,CRTAM,SLAMF8,NLRP12,MCOLN2,FPR3,HGF,PLAU,ROBO1,S100A4,CXCL12,NRP2,NRP1,CCRL2,GPNMB,SEMA4F,SEMA4B,ARHGEF16,ACKR3,SEMA4A,CMTM1,IFIT2,IFNAR1,IFNAR2,LAG3,STAT1,RIGI,IL2RA,IL2RB,TNFSF10,TNFRSF14,ACVRL1,IFNGR2,IL7,IL15,PRLR,TNFSF15,TN…	100/-
11_Summary	GO Biological Processes	GO:0006954	inflammatory response	-11.0782	-8.44088	301,558,923,929,960,961,968,1235,1393,1536,2212,2335,2359,2529,2896,2919,2921,3269,3460,3559,3579,3586,3620,3627,4069,4086,4192,4210,4283,5734,6352,6355,6373,6614,7852,8876,9034,9051,9258,9332,9435,9447,9830,10225,11343,26471,50848,56833,80833,115362,144811,153090,353376	ANXA1,AXL,CD6,CD14,CD44,CD47,CD68,CCR6,CRHBP,CYBB,FCGR2A,FN1,FPR3,FUT7,GRN,CXCL1,CXCL3,HRH1,IFNGR2,IL2RA,CXCR2,IL10,IDO1,CXCL10,LYZ,SMAD1,MDK,MEFV,CXCL9,PTGER4,CCL5,CCL8,CXCL11,SIGLEC1,CXCR4,VNN1,CCRL2,PSTPIP1,MFHAS1,CD163,CHST2,AIM2,TRIM14,CD96,MGLL,NUPR1,F11R,SLAMF8,APOL3,GBP5,LACC1,DAB2IP,TICAM2	53/-
12_Summary	GO Biological Processes	GO:0051336	regulation of hydrolase activity	-10.5438	-7.93929	330,444,710,831,834,945,960,1509,1512,1514,1612,1894,2099,2146,2896,3672,3958,4155,4210,4939,5031,5361,5641,5698,5900,5923,6091,6251,6281,6300,6352,6355,7294,8477,8743,9447,9705,9910,9966,10062,10154,10451,22914,23151,23348,23677,25780,26037,27074,27237,51429,55785,55803,55843,85440,91662,92154,114769,116986,152273,153020,153090	BIRC3,ASPH,SERPING1,CAST,CASP1,CD33,CD44,CTSD,CTSH,CTSL,DAPK1,ECT2,ESR1,EZH2,GRN,ITGA1,LGALS3,MBP,MEFV,OAS2,P2RY6,PLXNA1,LGMN,PSMB9,RALGDS,RASGRF1,ROBO1,RSU1,S100A10,MAPK12,CCL5,CCL8,TXK,GPR65,TNFSF10,AIM2,ST18,RABGAP1L,TNFSF15,NR1H3,PLXNC1,VAV3,KLRK1,GRAMD4,DOCK9,SH3BP4,RASGRP3,SIPA1L1,LAMP3,ARHGEF16,SNX9,FGD6,ADAP2,ARHGAP15,DOCK7,NLRP12,MTSS2,CARD16,AGAP2,FGD5,RASGEF1B,DAB2IP	62/-
13_Summary	Reactome Gene Sets	R-HSA-6798695	Neutrophil degranulation	-10.4729	-7.87623	302,929,945,960,961,968,1509,1512,1536,2212,2219,2495,2512,2799,2896,2919,3074,3101,3417,3579,3958,4069,5175,5236,5328,5912,6402,8514,8655,8826,8876,8987,10288,10493,10533,10577,10788,10875,22918,25798,26578,51316,51382,55313,203068,353376,388697	ANXA2,CD14,CD33,CD44,CD47,CD68,CTSD,CTSH,CYBB,FCGR2A,FCN1,FTH1,FTL,GNS,GRN,CXCL1,HEXB,HK3,IDH1,CXCR2,LGALS3,LYZ,PECAM1,PGM1,PLAU,RAP2B,SELL,KCNAB2,DYNLL1,IQGAP1,VNN1,STBD1,LILRB2,VAT1,ATG7,NPC2,IQGAP2,FGL2,CD93,BRI3,OSTF1,PLAC8,ATP6V1D,CPPED1,TUBB,TICAM2,HRNR	47/-
14_Summary	GO Biological Processes	GO:0050792	regulation of viral process	-10.2704	-7.68889	104,558,596,940,972,2219,3434,3669,3838,3956,4939,6352,6733,6772,7153,7852,9582,9830,27074,29969,30835,64135,85363,117854,140564,286827	ADARB1,AXL,BCL2,CD28,CD74,FCN1,IFIT1,ISG20,KPNA2,LGALS1,OAS2,CCL5,SRPK2,STAT1,TOP2A,CXCR4,APOBEC3B,TRIM14,LAMP3,MDFIC,CD209,IFIH1,TRIM5,TRIM6,APOBEC3D,TRIM59	26/-
15_Summary	Reactome Gene Sets	R-HSA-9716542	Signaling by Rho GTPases, Miro GTPases and RHOBTB3	-10.2194	-7.64538	87,120,394,699,991,1058,1062,1063,1536,1793,1894,4689,4810,5361,5910,7431,7456,7533,8364,8476,8655,8826,8987,9055,9367,9590,9644,9901,10409,10451,10505,10602,10788,23048,23348,27237,55143,55843,55852,57082,57584,64105,79658,80005,81839,81930,84033,85415,85440,90627,93663,94240,114822,144402,151246,152273,220134,347902,445582,653361	ACTN1,ADD3,ARHGAP5,BUB1,CDC20,CENPA,CENPE,CENPF,CYBB,DOCK1,ECT2,NCF4,NHS,PLXNA1,RAP1GDS1,VIM,WIPF1,YWHAH,H4C3,CDC42BPA,DYNLL1,IQGAP1,STBD1,PRC1,RAB9A,AKAP12,SH3PXD2A,SRGAP3,BASP1,VAV3,SEMA4F,CDC42EP3,IQGAP2,FNBP1,DOCK9,ARHGEF16,CDCA8,ARHGAP15,TEX2,KNL1,ARHGAP21,CENPK,ARHGAP10,DOCK5,VANGL1,KIF18A,OBSCN,RHPN2,DOCK7,STARD13,ARHGAP18,EPSTI1,RHPN1,CPNE8,SGO2,FGD5,SKA1,AMIGO2,POTEE,NCF1	60/-
16_Summary	KEGG Pathway	hsa04380	Osteoclast differentiation	-10.0226	-7.46304	54,799,2212,3454,3455,3460,4286,4689,5603,6300,6772,7006,7042,8651,8792,10288,10379,10859,10990,11024,11027,353514,653361,10451,25780	ACP5,CALCR,FCGR2A,IFNAR1,IFNAR2,IFNGR2,MITF,NCF4,MAPK13,MAPK12,STAT1,TEC,TGFB2,SOCS1,TNFRSF11A,LILRB2,IRF9,LILRB1,LILRB5,LILRA1,LILRA2,LILRA5,NCF1,VAV3,RASGRP3	25/-
17_Summary	KEGG Pathway	hsa04621	NOD-like receptor signaling pathway	-9.98475	-7.43919	330,596,834,1536,2633,2634,2635,2919,2921,3454,3455,4210,4939,5603,6300,6352,6772,9051,9447,10379,84674,90550,91662,114769,115361,115362,118429,2495,2512,3460,8743,55506,81030,353376	BIRC3,BCL2,CASP1,CYBB,GBP1,GBP2,GBP3,CXCL1,CXCL3,IFNAR1,IFNAR2,MEFV,OAS2,MAPK13,MAPK12,CCL5,STAT1,PSTPIP1,AIM2,IRF9,CARD6,MCU,NLRP12,CARD16,GBP4,GBP5,ANTXR2,FTH1,FTL,IFNGR2,TNFSF10,MACROH2A2,ZBP1,TICAM2	34/-
18_Summary	Reactome Gene Sets	R-HSA-1280215	Cytokine Signaling in Immune system	-9.62204	-7.10965	301,302,330,596,834,941,960,1845,1848,1901,2162,2317,2335,2633,2634,2635,2919,3082,3429,3433,3434,3454,3455,3460,3559,3560,3574,3586,3600,3627,3662,3669,3838,4684,4904,4939,5443,5618,5698,6352,6772,6809,7006,7314,7431,8651,8764,8792,9246,9830,9966,10379,10673,23586,26095,51191,54739,85363,115361,115362,117854,317649	ANXA1,ANXA2,BIRC3,BCL2,CASP1,CD80,CD44,DUSP3,DUSP6,S1PR1,F13A1,FLNB,FN1,GBP1,GBP2,GBP3,CXCL1,HGF,IFI27,IFIT2,IFIT1,IFNAR1,IFNAR2,IFNGR2,IL2RA,IL2RB,IL7,IL10,IL15,CXCL10,IRF4,ISG20,KPNA2,NCAM1,YBX1,OAS2,POMC,PRLR,PSMB9,CCL5,STAT1,STX3,TEC,UBB,VIM,SOCS1,TNFRSF14,TNFRSF11A,UBE2L6,TRIM14,TNFSF15,IRF9,TNFSF13B,RIGI,PTPN20,HERC5,XAF1,TRIM5,GBP4,GBP5,TRIM6,EIF4E3	62/-
19_Summary	GO Biological Processes	GO:0050727	regulation of inflammatory response	-9.5487	-7.04264	54,196,301,330,747,834,940,961,1910,2099,2529,2629,2896,3082,3559,3586,3600,3620,3956,4192,4210,5603,5734,6352,8792,8870,9258,9447,10062,11221,11343,26471,51704,56833,64116,81030,91662,114769,131450,144811,353514,653361	ACP5,AHR,ANXA1,BIRC3,DAGLA,CASP1,CD28,CD47,EDNRB,ESR1,FUT7,GBA1,GRN,HGF,IL2RA,IL10,IL15,IDO1,LGALS1,MDK,MEFV,MAPK13,PTGER4,CCL5,TNFRSF11A,IER3,MFHAS1,AIM2,NR1H3,DUSP10,MGLL,NUPR1,GPRC5B,SLAMF8,SLC39A8,ZBP1,NLRP12,CARD16,CD200R1,LACC1,LILRA5,NCF1	42/-
20_Summary	Reactome Gene Sets	R-HSA-109582	Hemostasis	-9.02325	-6.57597	87,302,483,710,747,928,960,961,962,972,1062,1793,2162,2335,2791,2995,3082,3672,3676,3778,3832,3959,5175,5328,5567,5577,6281,6383,6385,6402,6414,7042,7450,8407,9046,9672,9749,10112,10451,10490,11343,23052,23348,50848,55970,56992,57406,66005,80005,81930,85440,135228	ACTN1,ANXA2,ATP1B3,SERPING1,DAGLA,CD9,CD44,CD47,CD48,CD74,CENPE,DOCK1,F13A1,FN1,GNG11,GYPC,HGF,ITGA1,ITGA4,KCNMA1,KIF11,LGALS3BP,PECAM1,PLAU,PRKACB,PRKAR2B,S100A10,SDC2,SDC4,SELL,SELENOP,TGFB2,VWF,TAGLN2,DOK2,SDC3,PHACTR2,KIF20A,VAV3,VTI1B,MGLL,ENDOD1,DOCK9,F11R,GNG12,KIF15,ABHD6,CHID1,DOCK5,KIF18A,DOCK7,CD109	52/-
1_Member	GO Biological Processes	GO:0045087	innate immune response	-26.0204	-21.6755	104,301,384,558,575,710,834,912,923,929,961,972,1536,1612,2219,2317,2633,2634,2635,3429,3433,3434,3454,3455,3460,3627,3669,3821,3822,3902,3958,4210,4939,5052,6039,6352,6355,6584,6733,6772,7431,8542,8764,8876,8942,9051,9076,9246,9258,9447,9582,9830,10133,10462,11027,22914,23052,23098,23586,26253,30835,50856,51191,51667,54809,55601,56907,57823,64135,66005,81030,81035,84243,84282,85363,93082,114836,…	ADARB1,ANXA1,ARG2,AXL,ADGRB1,SERPING1,CASP1,CD1D,CD6,CD14,CD47,CD74,CYBB,DAPK1,FCN1,FLNB,GBP1,GBP2,GBP3,IFI27,IFIT2,IFIT1,IFNAR1,IFNAR2,IFNGR2,CXCL10,ISG20,KLRC1,KLRC2,LAG3,LGALS3,MEFV,OAS2,PRDX1,RNASE6,CCL5,CCL8,SLC22A5,SRPK2,STAT1,VIM,APOL1,TNFRSF14,VNN1,KYNU,PSTPIP1,CLDN1,UBE2L6,MFHAS1,AIM2,APOBEC3B,TRIM14,OPTN,CLEC10A,LILRA2,KLRK1,ENDOD1,SARM1,RIGI,CLEC4E,CD209,CLEC4A,HERC5,NUB1,SAMD9,DDX60,S…	92/775
1_Member	GO Biological Processes	GO:0009615	response to virus	-14.2016	-11.1992	104,596,664,834,2633,2634,2635,3429,3433,3434,3454,3455,3460,3627,3669,3696,4283,4321,4939,6039,6352,6355,6387,6772,7852,9447,9582,10379,10533,10561,10577,10859,23586,51191,51251,55601,64108,64135,81030,84282,85363,91607,115362,117854,140564,146857,256987	ADARB1,BCL2,BNIP3,CASP1,GBP1,GBP2,GBP3,IFI27,IFIT2,IFIT1,IFNAR1,IFNAR2,IFNGR2,CXCL10,ISG20,ITGB8,CXCL9,MMP12,OAS2,RNASE6,CCL5,CCL8,CXCL12,STAT1,CXCR4,AIM2,APOBEC3B,IRF9,ATG7,IFI44,NPC2,LILRB1,RIGI,HERC5,NT5C3A,DDX60,RTP4,IFIH1,ZBP1,RNF135,TRIM5,SLFN11,GBP5,TRIM6,APOBEC3D,SLFN13,SERINC5	47/379
1_Member	GO Biological Processes	GO:0051607	defense response to virus	-13.2387	-10.274	104,596,664,834,2633,2634,2635,3429,3433,3434,3455,3460,3627,3669,4283,4939,6039,6772,9447,9582,10379,10533,10859,23586,51191,51251,55601,64108,64135,81030,84282,85363,91607,115362,117854,140564,146857,256987	ADARB1,BCL2,BNIP3,CASP1,GBP1,GBP2,GBP3,IFI27,IFIT2,IFIT1,IFNAR2,IFNGR2,CXCL10,ISG20,CXCL9,OAS2,RNASE6,STAT1,AIM2,APOBEC3B,IRF9,ATG7,LILRB1,RIGI,HERC5,NT5C3A,DDX60,RTP4,IFIH1,ZBP1,RNF135,TRIM5,SLFN11,GBP5,TRIM6,APOBEC3D,SLFN13,SERINC5	38/272
1_Member	Reactome Gene Sets	R-HSA-913531	Interferon Signaling	-8.79679	-6.35498	960,2317,2633,2634,2635,3429,3433,3434,3454,3455,3460,3662,3669,3838,4684,4904,4939,6772,7314,8651,9246,9830,10379,23586,51191,54739,85363,115361,115362,117854,317649	CD44,FLNB,GBP1,GBP2,GBP3,IFI27,IFIT2,IFIT1,IFNAR1,IFNAR2,IFNGR2,IRF4,ISG20,KPNA2,NCAM1,YBX1,OAS2,STAT1,UBB,SOCS1,UBE2L6,TRIM14,IRF9,RIGI,HERC5,XAF1,TRIM5,GBP4,GBP5,TRIM6,EIF4E3	31/269
1_Member	Reactome Gene Sets	R-HSA-877300	Interferon gamma signaling	-7.84232	-5.53084	960,2633,2634,2635,3460,3662,4684,4904,4939,6772,8651,9830,10379,85363,115361,115362,117854	CD44,GBP1,GBP2,GBP3,IFNGR2,IRF4,NCAM1,YBX1,OAS2,STAT1,SOCS1,TRIM14,IRF9,TRIM5,GBP4,GBP5,TRIM6	17/96
1_Member	Reactome Gene Sets	R-HSA-909733	Interferon alpha/beta signaling	-6.71935	-4.49172	2634,3429,3433,3434,3454,3455,3662,3669,4939,6772,7314,8651,10379,54739	GBP2,IFI27,IFIT2,IFIT1,IFNAR1,IFNAR2,IRF4,ISG20,OAS2,STAT1,UBB,SOCS1,IRF9,XAF1	14/77
2_Member	GO Biological Processes	GO:0050865	regulation of cell activation	-20.0603	-16.0165	196,301,384,430,558,596,864,912,916,923,928,940,941,945,952,961,972,1840,1845,2048,2335,2729,2896,3559,3574,3586,3600,3620,3662,3821,3822,3902,3956,3958,4192,4254,4323,5618,5914,6352,6385,6461,6708,7006,7294,8651,8764,8876,9258,9840,10062,10288,10385,10451,10457,10673,10859,10875,11027,11221,22914,26191,29117,30835,50848,54537,56253,56833,84034,146722,257101,353376,353514	AHR,ANXA1,ARG2,ASCL2,AXL,BCL2,RUNX3,CD1D,CD3E,CD6,CD9,CD28,CD80,CD33,CD38,CD47,CD74,DTX1,DUSP3,EPHB2,FN1,GCLC,GRN,IL2RA,IL7,IL10,IL15,IDO1,IRF4,KLRC1,KLRC2,LAG3,LGALS1,LGALS3,MDK,KITLG,MMP14,PRLR,RARA,CCL5,SDC4,SHB,SPTA1,TEC,TXK,SOCS1,TNFRSF14,VNN1,MFHAS1,TESPA1,NR1H3,LILRB2,BTN2A2,VAV3,GPNMB,TNFSF13B,LILRB1,FGL2,LILRA2,DUSP10,KLRK1,PTPN22,BRD7,CD209,F11R,SHLD2,CRTAM,SLAMF8,EMILIN2,CD300LF,ZNF683…	73/630
2_Member	GO Biological Processes	GO:0002694	regulation of leukocyte activation	-17.428	-13.7821	196,301,384,430,558,596,864,912,916,923,940,941,945,952,961,972,1840,1845,2048,2335,2896,3559,3574,3586,3600,3620,3662,3821,3822,3902,3956,3958,4192,4254,4323,5618,5914,6352,6385,6461,6708,8651,8764,8876,9258,9840,10062,10288,10385,10451,10457,10673,10859,10875,11221,22914,26191,29117,30835,54537,56253,56833,146722,257101,353376	AHR,ANXA1,ARG2,ASCL2,AXL,BCL2,RUNX3,CD1D,CD3E,CD6,CD28,CD80,CD33,CD38,CD47,CD74,DTX1,DUSP3,EPHB2,FN1,GRN,IL2RA,IL7,IL10,IL15,IDO1,IRF4,KLRC1,KLRC2,LAG3,LGALS1,LGALS3,MDK,KITLG,MMP14,PRLR,RARA,CCL5,SDC4,SHB,SPTA1,SOCS1,TNFRSF14,VNN1,MFHAS1,TESPA1,NR1H3,LILRB2,BTN2A2,VAV3,GPNMB,TNFSF13B,LILRB1,FGL2,DUSP10,KLRK1,PTPN22,BRD7,CD209,SHLD2,CRTAM,SLAMF8,CD300LF,ZNF683,TICAM2	65/573
2_Member	GO Biological Processes	GO:1903037	regulation of leukocyte cell-cell adhesion	-16.7106	-13.1617	301,384,430,864,912,916,923,940,941,960,961,972,1840,1845,2529,2650,3559,3574,3586,3600,3620,3676,3902,3956,3958,4192,4254,5914,6352,6385,6387,6461,6484,6708,8651,8764,8876,9435,9840,10288,10385,10457,10673,10859,10875,11221,22914,26191,29117,30835,56253	ANXA1,ARG2,ASCL2,RUNX3,CD1D,CD3E,CD6,CD28,CD80,CD44,CD47,CD74,DTX1,DUSP3,FUT7,GCNT1,IL2RA,IL7,IL10,IL15,IDO1,ITGA4,LAG3,LGALS1,LGALS3,MDK,KITLG,RARA,CCL5,SDC4,CXCL12,SHB,ST3GAL4,SPTA1,SOCS1,TNFRSF14,VNN1,CHST2,TESPA1,LILRB2,BTN2A2,GPNMB,TNFSF13B,LILRB1,FGL2,DUSP10,KLRK1,PTPN22,BRD7,CD209,CRTAM	51/382
2_Member	GO Biological Processes	GO:0051249	regulation of lymphocyte activation	-16.4181	-12.9901	196,301,384,430,558,596,864,912,916,923,940,941,952,961,972,1840,1845,2048,3559,3574,3586,3600,3620,3662,3821,3822,3902,3956,3958,4192,4254,4323,5618,5914,6352,6385,6461,6708,8651,8764,8876,9840,10288,10385,10451,10457,10673,10859,10875,11221,22914,26191,29117,30835,54537,56253,56833,257101,353376	AHR,ANXA1,ARG2,ASCL2,AXL,BCL2,RUNX3,CD1D,CD3E,CD6,CD28,CD80,CD38,CD47,CD74,DTX1,DUSP3,EPHB2,IL2RA,IL7,IL10,IL15,IDO1,IRF4,KLRC1,KLRC2,LAG3,LGALS1,LGALS3,MDK,KITLG,MMP14,PRLR,RARA,CCL5,SDC4,SHB,SPTA1,SOCS1,TNFRSF14,VNN1,TESPA1,LILRB2,BTN2A2,VAV3,GPNMB,TNFSF13B,LILRB1,FGL2,DUSP10,KLRK1,PTPN22,BRD7,CD209,SHLD2,CRTAM,SLAMF8,ZNF683,TICAM2	59/506
2_Member	GO Biological Processes	GO:0002683	negative regulation of immune system process	-15.6356	-12.4047	54,196,301,384,430,558,710,864,941,945,968,972,1379,1840,1845,2335,2633,2896,3559,3586,3620,3662,3805,3821,3902,3958,4192,4210,4254,4321,5734,5914,6385,6387,7042,8651,8764,9258,9935,10062,10225,10288,10385,10457,10859,10875,11027,11221,22914,23098,23151,23220,26191,56253,56833,84243,131450,146722,153090	ACP5,AHR,ANXA1,ARG2,ASCL2,AXL,SERPING1,RUNX3,CD80,CD33,CD68,CD74,CR1L,DTX1,DUSP3,FN1,GBP1,GRN,IL2RA,IL10,IDO1,IRF4,KIR2DL4,KLRC1,LAG3,LGALS3,MDK,MEFV,KITLG,MMP12,PTGER4,RARA,SDC4,CXCL12,TGFB2,SOCS1,TNFRSF14,MFHAS1,MAFB,NR1H3,CD96,LILRB2,BTN2A2,GPNMB,LILRB1,FGL2,LILRA2,DUSP10,KLRK1,SARM1,GRAMD4,DTX4,PTPN22,CRTAM,SLAMF8,ZDHHC18,CD200R1,CD300LF,DAB2IP	59/526
2_Member	GO Biological Processes	GO:0022407	regulation of cell-cell adhesion	-14.991	-11.9014	301,384,430,864,912,916,923,928,940,941,960,961,972,1840,1845,2529,2650,3559,3574,3586,3600,3620,3676,3902,3956,3958,4155,4192,4254,4651,5914,6352,6385,6387,6461,6484,6708,8651,8764,8876,9435,9840,10288,10385,10457,10673,10859,10875,11221,22914,26191,29117,30835,50848,56253,84034	ANXA1,ARG2,ASCL2,RUNX3,CD1D,CD3E,CD6,CD9,CD28,CD80,CD44,CD47,CD74,DTX1,DUSP3,FUT7,GCNT1,IL2RA,IL7,IL10,IL15,IDO1,ITGA4,LAG3,LGALS1,LGALS3,MBP,MDK,KITLG,MYO10,RARA,CCL5,SDC4,CXCL12,SHB,ST3GAL4,SPTA1,SOCS1,TNFRSF14,VNN1,CHST2,TESPA1,LILRB2,BTN2A2,GPNMB,TNFSF13B,LILRB1,FGL2,DUSP10,KLRK1,PTPN22,BRD7,CD209,F11R,CRTAM,EMILIN2	56/496
2_Member	GO Biological Processes	GO:0045785	positive regulation of cell adhesion	-14.8153	-11.7492	301,864,912,916,923,940,941,960,961,972,1793,2335,2529,2650,3381,3559,3574,3586,3600,3676,3913,3956,4192,4254,4651,5914,6251,6281,6352,6385,6387,6461,6484,6708,6809,7042,7402,8651,8764,8829,8876,9435,9840,10288,10385,10451,10673,10859,11221,22914,29117,30835,50848,80005,84034	ANXA1,RUNX3,CD1D,CD3E,CD6,CD28,CD80,CD44,CD47,CD74,DOCK1,FN1,FUT7,GCNT1,IBSP,IL2RA,IL7,IL10,IL15,ITGA4,LAMB2,LGALS1,MDK,KITLG,MYO10,RARA,RSU1,S100A10,CCL5,SDC4,CXCL12,SHB,ST3GAL4,SPTA1,STX3,TGFB2,UTRN,SOCS1,TNFRSF14,NRP1,VNN1,CHST2,TESPA1,LILRB2,BTN2A2,VAV3,TNFSF13B,LILRB1,DUSP10,KLRK1,BRD7,CD209,F11R,DOCK5,EMILIN2	55/485
2_Member	GO Biological Processes	GO:0050863	regulation of T cell activation	-13.4375	-10.4543	301,384,430,864,912,916,923,940,941,961,972,1840,1845,3559,3574,3586,3600,3620,3662,3902,3956,3958,4192,4254,5914,6352,6385,6461,6708,8651,8764,8876,9840,10288,10385,10457,10673,10859,10875,11221,22914,26191,29117,30835,56253,257101	ANXA1,ARG2,ASCL2,RUNX3,CD1D,CD3E,CD6,CD28,CD80,CD47,CD74,DTX1,DUSP3,IL2RA,IL7,IL10,IL15,IDO1,IRF4,LAG3,LGALS1,LGALS3,MDK,KITLG,RARA,CCL5,SDC4,SHB,SPTA1,SOCS1,TNFRSF14,VNN1,TESPA1,LILRB2,BTN2A2,GPNMB,TNFSF13B,LILRB1,FGL2,DUSP10,KLRK1,PTPN22,BRD7,CD209,CRTAM,ZNF683	46/382
2_Member	GO Biological Processes	GO:0022409	positive regulation of cell-cell adhesion	-12.7166	-9.78664	301,864,912,916,923,940,941,960,961,972,2529,2650,3559,3574,3586,3600,3676,3956,4192,4254,4651,5914,6352,6461,6484,6708,8651,8764,8876,9435,9840,10288,10385,10673,10859,11221,22914,29117,30835,50848,84034	ANXA1,RUNX3,CD1D,CD3E,CD6,CD28,CD80,CD44,CD47,CD74,FUT7,GCNT1,IL2RA,IL7,IL10,IL15,ITGA4,LGALS1,MDK,KITLG,MYO10,RARA,CCL5,SHB,ST3GAL4,SPTA1,SOCS1,TNFRSF14,VNN1,CHST2,TESPA1,LILRB2,BTN2A2,TNFSF13B,LILRB1,DUSP10,KLRK1,BRD7,CD209,F11R,EMILIN2	41/325
2_Member	GO Biological Processes	GO:0051251	positive regulation of lymphocyte activation	-12.5829	-9.6928	301,558,596,864,912,916,923,940,941,952,961,972,2048,3559,3574,3586,3600,3956,4192,4254,4323,5618,5914,6352,6461,6708,8651,8764,8876,9840,10288,10385,10451,10673,10859,11221,22914,29117,30835,54537,353376	ANXA1,AXL,BCL2,RUNX3,CD1D,CD3E,CD6,CD28,CD80,CD38,CD47,CD74,EPHB2,IL2RA,IL7,IL10,IL15,LGALS1,MDK,KITLG,MMP14,PRLR,RARA,CCL5,SHB,SPTA1,SOCS1,TNFRSF14,VNN1,TESPA1,LILRB2,BTN2A2,VAV3,TNFSF13B,LILRB1,DUSP10,KLRK1,BRD7,CD209,SHLD2,TICAM2	41/328
2_Member	GO Biological Processes	GO:1903039	positive regulation of leukocyte cell-cell adhesion	-12.299	-9.45928	301,864,912,916,923,940,941,960,961,972,2529,2650,3559,3574,3600,3676,3956,4192,4254,5914,6352,6461,6484,6708,8651,8764,8876,9435,9840,10288,10385,10673,10859,11221,22914,29117,30835	ANXA1,RUNX3,CD1D,CD3E,CD6,CD28,CD80,CD44,CD47,CD74,FUT7,GCNT1,IL2RA,IL7,IL15,ITGA4,LGALS1,MDK,KITLG,RARA,CCL5,SHB,ST3GAL4,SPTA1,SOCS1,TNFRSF14,VNN1,CHST2,TESPA1,LILRB2,BTN2A2,TNFSF13B,LILRB1,DUSP10,KLRK1,BRD7,CD209	37/277
2_Member	GO Biological Processes	GO:0050866	negative regulation of cell activation	-12.0095	-9.2087	301,384,430,558,864,928,941,945,972,1840,1845,2335,2729,2896,3559,3586,3620,3902,3958,4192,6385,8651,8764,10062,10288,10385,10457,10859,10875,26191,56253,146722	ANXA1,ARG2,ASCL2,AXL,RUNX3,CD9,CD80,CD33,CD74,DTX1,DUSP3,FN1,GCLC,GRN,IL2RA,IL10,IDO1,LAG3,LGALS3,MDK,SDC4,SOCS1,TNFRSF14,NR1H3,LILRB2,BTN2A2,GPNMB,LILRB1,FGL2,PTPN22,CRTAM,CD300LF	32/215
2_Member	GO Biological Processes	GO:0002695	negative regulation of leukocyte activation	-11.8562	-9.06759	301,384,430,558,864,941,945,972,1840,1845,2335,2896,3559,3586,3620,3902,3958,4192,6385,8651,8764,10062,10288,10385,10457,10859,10875,26191,56253,146722	ANXA1,ARG2,ASCL2,AXL,RUNX3,CD80,CD33,CD74,DTX1,DUSP3,FN1,GRN,IL2RA,IL10,IDO1,LAG3,LGALS3,MDK,SDC4,SOCS1,TNFRSF14,NR1H3,LILRB2,BTN2A2,GPNMB,LILRB1,FGL2,PTPN22,CRTAM,CD300LF	30/192
2_Member	GO Biological Processes	GO:0050867	positive regulation of cell activation	-11.6802	-8.94942	301,558,596,864,912,916,923,940,941,952,961,972,2048,3559,3574,3586,3600,3956,4192,4254,4323,5618,5914,6352,6461,6708,8651,8764,8876,9840,10288,10385,10451,10673,10859,11027,11221,22914,29117,30835,54537,353376,353514	ANXA1,AXL,BCL2,RUNX3,CD1D,CD3E,CD6,CD28,CD80,CD38,CD47,CD74,EPHB2,IL2RA,IL7,IL10,IL15,LGALS1,MDK,KITLG,MMP14,PRLR,RARA,CCL5,SHB,SPTA1,SOCS1,TNFRSF14,VNN1,TESPA1,LILRB2,BTN2A2,VAV3,TNFSF13B,LILRB1,LILRA2,DUSP10,KLRK1,BRD7,CD209,SHLD2,TICAM2,LILRA5	43/380
2_Member	GO Biological Processes	GO:0050670	regulation of lymphocyte proliferation	-11.5429	-8.83151	196,301,384,596,912,916,923,940,941,952,972,2048,3559,3574,3586,3600,3620,3958,4254,5618,6352,6385,6708,8764,10288,10385,10451,10457,10673,10859,26191,30835,56253	AHR,ANXA1,ARG2,BCL2,CD1D,CD3E,CD6,CD28,CD80,CD38,CD74,EPHB2,IL2RA,IL7,IL10,IL15,IDO1,LGALS3,KITLG,PRLR,CCL5,SDC4,SPTA1,TNFRSF14,LILRB2,BTN2A2,VAV3,GPNMB,TNFSF13B,LILRB1,PTPN22,CD209,CRTAM	33/237
2_Member	GO Biological Processes	GO:0007162	negative regulation of cell adhesion	-11.4473	-8.75112	94,301,384,430,864,928,941,972,1840,1845,2048,2633,3559,3586,3620,3902,3958,4155,4192,4241,4321,4323,5361,5800,6385,6387,7045,8651,8764,10154,10288,10385,10457,10859,10875,26191,27299,56253	ACVRL1,ANXA1,ARG2,ASCL2,RUNX3,CD9,CD80,CD74,DTX1,DUSP3,EPHB2,GBP1,IL2RA,IL10,IDO1,LAG3,LGALS3,MBP,MDK,MELTF,MMP12,MMP14,PLXNA1,PTPRO,SDC4,CXCL12,TGFBI,SOCS1,TNFRSF14,PLXNC1,LILRB2,BTN2A2,GPNMB,LILRB1,FGL2,PTPN22,ADAMDEC1,CRTAM	38/310
2_Member	GO Biological Processes	GO:0032944	regulation of mononuclear cell proliferation	-11.3398	-8.66285	196,301,384,596,912,916,923,940,941,952,972,2048,3559,3574,3586,3600,3620,3958,4254,5618,6352,6385,6708,8764,10288,10385,10451,10457,10673,10859,26191,30835,56253	AHR,ANXA1,ARG2,BCL2,CD1D,CD3E,CD6,CD28,CD80,CD38,CD74,EPHB2,IL2RA,IL7,IL10,IL15,IDO1,LGALS3,KITLG,PRLR,CCL5,SDC4,SPTA1,TNFRSF14,LILRB2,BTN2A2,VAV3,GPNMB,TNFSF13B,LILRB1,PTPN22,CD209,CRTAM	33/241
2_Member	GO Biological Processes	GO:0050868	negative regulation of T cell activation	-11.2744	-8.61074	301,384,430,864,941,972,1840,1845,3559,3586,3620,3902,3958,4192,6385,8651,8764,10288,10385,10457,10859,10875,26191,56253	ANXA1,ARG2,ASCL2,RUNX3,CD80,CD74,DTX1,DUSP3,IL2RA,IL10,IDO1,LAG3,LGALS3,MDK,SDC4,SOCS1,TNFRSF14,LILRB2,BTN2A2,GPNMB,LILRB1,FGL2,PTPN22,CRTAM	24/129
2_Member	GO Biological Processes	GO:0002696	positive regulation of leukocyte activation	-11.179	-8.5243	301,558,596,864,912,916,923,940,941,952,961,972,2048,3559,3574,3586,3600,3956,4192,4254,4323,5618,5914,6352,6461,6708,8651,8764,8876,9840,10288,10385,10451,10673,10859,11221,22914,29117,30835,54537,353376	ANXA1,AXL,BCL2,RUNX3,CD1D,CD3E,CD6,CD28,CD80,CD38,CD47,CD74,EPHB2,IL2RA,IL7,IL10,IL15,LGALS1,MDK,KITLG,MMP14,PRLR,RARA,CCL5,SHB,SPTA1,SOCS1,TNFRSF14,VNN1,TESPA1,LILRB2,BTN2A2,VAV3,TNFSF13B,LILRB1,DUSP10,KLRK1,BRD7,CD209,SHLD2,TICAM2	41/362
2_Member	GO Biological Processes	GO:0070663	regulation of leukocyte proliferation	-10.7704	-8.14981	196,301,384,596,912,916,923,940,941,952,972,2048,3559,3574,3586,3600,3620,3958,4254,5618,6352,6355,6385,6708,8764,10288,10385,10451,10457,10673,10859,26191,30835,56253	AHR,ANXA1,ARG2,BCL2,CD1D,CD3E,CD6,CD28,CD80,CD38,CD74,EPHB2,IL2RA,IL7,IL10,IL15,IDO1,LGALS3,KITLG,PRLR,CCL5,CCL8,SDC4,SPTA1,TNFRSF14,LILRB2,BTN2A2,VAV3,GPNMB,TNFSF13B,LILRB1,PTPN22,CD209,CRTAM	34/267
2_Member	GO Biological Processes	GO:1903038	negative regulation of leukocyte cell-cell adhesion	-10.7509	-8.13841	301,384,430,864,941,972,1840,1845,3559,3586,3620,3902,3958,4192,6385,6387,8651,8764,10288,10385,10457,10859,10875,26191,56253	ANXA1,ARG2,ASCL2,RUNX3,CD80,CD74,DTX1,DUSP3,IL2RA,IL10,IDO1,LAG3,LGALS3,MDK,SDC4,CXCL12,SOCS1,TNFRSF14,LILRB2,BTN2A2,GPNMB,LILRB1,FGL2,PTPN22,CRTAM	25/148
2_Member	GO Biological Processes	GO:0045619	regulation of lymphocyte differentiation	-9.88728	-7.34856	301,430,558,864,940,941,972,1840,3559,3574,3586,3600,3662,3902,4192,4323,5914,6461,8651,8876,9840,10288,10385,10875,11221,29117,56253,56833,257101	ANXA1,ASCL2,AXL,RUNX3,CD28,CD80,CD74,DTX1,IL2RA,IL7,IL10,IL15,IRF4,LAG3,MDK,MMP14,RARA,SHB,SOCS1,VNN1,TESPA1,LILRB2,BTN2A2,FGL2,DUSP10,BRD7,CRTAM,SLAMF8,ZNF683	29/215
2_Member	GO Biological Processes	GO:0051250	negative regulation of lymphocyte activation	-9.6993	-7.18047	301,384,430,558,864,941,972,1840,1845,3559,3586,3620,3902,3958,4192,6385,8651,8764,10288,10385,10457,10859,10875,26191,56253	ANXA1,ARG2,ASCL2,AXL,RUNX3,CD80,CD74,DTX1,DUSP3,IL2RA,IL10,IDO1,LAG3,LGALS3,MDK,SDC4,SOCS1,TNFRSF14,LILRB2,BTN2A2,GPNMB,LILRB1,FGL2,PTPN22,CRTAM	25/165
2_Member	GO Biological Processes	GO:1902105	regulation of leukocyte differentiation	-9.5132	-7.01339	301,430,558,864,940,941,972,1840,3559,3574,3586,3600,3662,3902,4192,4254,4286,4323,5914,6461,8651,8792,8876,9398,9840,9935,10288,10385,10859,10875,11221,29117,56253,56833,84293,257101	ANXA1,ASCL2,AXL,RUNX3,CD28,CD80,CD74,DTX1,IL2RA,IL7,IL10,IL15,IRF4,LAG3,MDK,KITLG,MITF,MMP14,RARA,SHB,SOCS1,TNFRSF11A,VNN1,CD101,TESPA1,MAFB,LILRB2,BTN2A2,LILRB1,FGL2,DUSP10,BRD7,CRTAM,SLAMF8,PRXL2A,ZNF683	36/328
2_Member	GO Biological Processes	GO:0050870	positive regulation of T cell activation	-9.45644	-6.9628	301,864,912,916,923,940,941,961,972,3559,3574,3600,3956,4192,4254,5914,6352,6461,6708,8651,8764,8876,9840,10288,10385,10673,10859,11221,22914,29117,30835	ANXA1,RUNX3,CD1D,CD3E,CD6,CD28,CD80,CD47,CD74,IL2RA,IL7,IL15,LGALS1,MDK,KITLG,RARA,CCL5,SHB,SPTA1,SOCS1,TNFRSF14,VNN1,TESPA1,LILRB2,BTN2A2,TNFSF13B,LILRB1,DUSP10,KLRK1,BRD7,CD209	31/253
2_Member	GO Biological Processes	GO:0022408	negative regulation of cell-cell adhesion	-9.11426	-6.66145	301,384,430,864,928,941,972,1840,1845,3559,3586,3620,3902,3958,4155,4192,6385,6387,8651,8764,10288,10385,10457,10859,10875,26191,56253	ANXA1,ARG2,ASCL2,RUNX3,CD9,CD80,CD74,DTX1,DUSP3,IL2RA,IL10,IDO1,LAG3,LGALS3,MBP,MDK,SDC4,CXCL12,SOCS1,TNFRSF14,LILRB2,BTN2A2,GPNMB,LILRB1,FGL2,PTPN22,CRTAM	27/203
2_Member	GO Biological Processes	GO:0045580	regulation of T cell differentiation	-8.73309	-6.3176	301,430,864,940,941,972,1840,3559,3574,3600,3662,3902,4192,5914,6461,8651,8876,9840,10288,10385,10875,11221,29117,56253,257101	ANXA1,ASCL2,RUNX3,CD28,CD80,CD74,DTX1,IL2RA,IL7,IL15,IRF4,LAG3,MDK,RARA,SHB,SOCS1,VNN1,TESPA1,LILRB2,BTN2A2,FGL2,DUSP10,BRD7,CRTAM,ZNF683	25/183
2_Member	GO Biological Processes	GO:0042129	regulation of T cell proliferation	-8.1497	-5.78707	301,384,912,916,923,940,941,3559,3586,3600,3620,3958,4254,6352,6385,6708,8764,10288,10385,10457,10673,10859,30835,56253	ANXA1,ARG2,CD1D,CD3E,CD6,CD28,CD80,IL2RA,IL10,IL15,IDO1,LGALS3,KITLG,CCL5,SDC4,SPTA1,TNFRSF14,LILRB2,BTN2A2,GPNMB,TNFSF13B,LILRB1,CD209,CRTAM	24/181
2_Member	GO Biological Processes	GO:1903706	regulation of hemopoiesis	-8.03682	-5.69192	301,430,558,864,940,941,972,1840,3559,3574,3586,3600,3662,3902,4192,4254,4286,4323,5914,6461,6772,8364,8651,8792,8876,9398,9840,9935,10288,10385,10826,10859,10875,11221,29117,56253,56833,84293,257101	ANXA1,ASCL2,AXL,RUNX3,CD28,CD80,CD74,DTX1,IL2RA,IL7,IL10,IL15,IRF4,LAG3,MDK,KITLG,MITF,MMP14,RARA,SHB,STAT1,H4C3,SOCS1,TNFRSF11A,VNN1,CD101,TESPA1,MAFB,LILRB2,BTN2A2,FAXDC2,LILRB1,FGL2,DUSP10,BRD7,CRTAM,SLAMF8,PRXL2A,ZNF683	39/424
2_Member	GO Biological Processes	GO:0050671	positive regulation of lymphocyte proliferation	-8.00692	-5.67062	301,596,912,916,923,940,941,952,972,2048,3559,3574,3600,4254,5618,6352,6708,10288,10451,10673,30835	ANXA1,BCL2,CD1D,CD3E,CD6,CD28,CD80,CD38,CD74,EPHB2,IL2RA,IL7,IL15,KITLG,PRLR,CCL5,SPTA1,LILRB2,VAV3,TNFSF13B,CD209	21/143
2_Member	GO Biological Processes	GO:0032946	positive regulation of mononuclear cell proliferation	-7.84349	-5.53084	301,596,912,916,923,940,941,952,972,2048,3559,3574,3600,4254,5618,6352,6708,10288,10451,10673,30835	ANXA1,BCL2,CD1D,CD3E,CD6,CD28,CD80,CD38,CD74,EPHB2,IL2RA,IL7,IL15,KITLG,PRLR,CCL5,SPTA1,LILRB2,VAV3,TNFSF13B,CD209	21/146
2_Member	GO Biological Processes	GO:0045621	positive regulation of lymphocyte differentiation	-7.8364	-5.52892	301,558,864,941,972,3559,3574,3586,3600,4192,4323,5914,6461,8651,8876,9840,10288,10385,11221,29117	ANXA1,AXL,RUNX3,CD80,CD74,IL2RA,IL7,IL10,IL15,MDK,MMP14,RARA,SHB,SOCS1,VNN1,TESPA1,LILRB2,BTN2A2,DUSP10,BRD7	20/133
2_Member	GO Biological Processes	GO:1902107	positive regulation of leukocyte differentiation	-7.09132	-4.83632	301,558,864,941,972,3559,3574,3586,3600,4192,4254,4323,5914,6461,8651,8792,8876,9398,9840,10288,10385,11221,29117	ANXA1,AXL,RUNX3,CD80,CD74,IL2RA,IL7,IL10,IL15,MDK,KITLG,MMP14,RARA,SHB,SOCS1,TNFRSF11A,VNN1,CD101,TESPA1,LILRB2,BTN2A2,DUSP10,BRD7	23/190
2_Member	GO Biological Processes	GO:1903708	positive regulation of hemopoiesis	-7.09132	-4.83632	301,558,864,941,972,3559,3574,3586,3600,4192,4254,4323,5914,6461,8651,8792,8876,9398,9840,10288,10385,11221,29117	ANXA1,AXL,RUNX3,CD80,CD74,IL2RA,IL7,IL10,IL15,MDK,KITLG,MMP14,RARA,SHB,SOCS1,TNFRSF11A,VNN1,CD101,TESPA1,LILRB2,BTN2A2,DUSP10,BRD7	23/190
2_Member	GO Biological Processes	GO:0070665	positive regulation of leukocyte proliferation	-6.95021	-4.70221	301,596,912,916,923,940,941,952,972,2048,3559,3574,3600,4254,5618,6352,6708,10288,10451,10673,30835	ANXA1,BCL2,CD1D,CD3E,CD6,CD28,CD80,CD38,CD74,EPHB2,IL2RA,IL7,IL15,KITLG,PRLR,CCL5,SPTA1,LILRB2,VAV3,TNFSF13B,CD209	21/164
2_Member	GO Biological Processes	GO:0010720	positive regulation of cell development	-6.33049	-4.14696	301,558,596,864,941,972,2048,2335,3559,3574,3586,3600,4192,4254,4323,5361,5914,6091,6387,6461,6790,7852,8651,8792,8829,8876,9294,9398,9840,10154,10288,10385,11221,29117,29904,50848,145864	ANXA1,AXL,BCL2,RUNX3,CD80,CD74,EPHB2,FN1,IL2RA,IL7,IL10,IL15,MDK,KITLG,MMP14,PLXNA1,RARA,ROBO1,CXCL12,SHB,AURKA,CXCR4,SOCS1,TNFRSF11A,NRP1,VNN1,S1PR2,CD101,TESPA1,PLXNC1,LILRB2,BTN2A2,DUSP10,BRD7,EEF2K,F11R,HAPLN3	37/454
2_Member	GO Biological Processes	GO:0045582	positive regulation of T cell differentiation	-5.73207	-3.61761	301,864,941,972,3559,3574,4192,5914,6461,8651,8876,9840,10288,10385,11221,29117	ANXA1,RUNX3,CD80,CD74,IL2RA,IL7,MDK,RARA,SHB,SOCS1,VNN1,TESPA1,LILRB2,BTN2A2,DUSP10,BRD7	16/119
2_Member	GO Biological Processes	GO:0042130	negative regulation of T cell proliferation	-5.36655	-3.30268	384,941,3559,3586,3620,6385,8764,10288,10385,10457,10859,56253	ARG2,CD80,IL2RA,IL10,IDO1,SDC4,TNFRSF14,LILRB2,BTN2A2,GPNMB,LILRB1,CRTAM	12/73
2_Member	GO Biological Processes	GO:0042102	positive regulation of T cell proliferation	-5.09971	-3.08724	301,912,916,923,940,941,3559,3600,4254,6352,6708,10288,10673,30835	ANXA1,CD1D,CD3E,CD6,CD28,CD80,IL2RA,IL15,KITLG,CCL5,SPTA1,LILRB2,TNFSF13B,CD209	14/104
2_Member	GO Biological Processes	GO:0070664	negative regulation of leukocyte proliferation	-4.70918	-2.75697	384,941,3559,3586,3620,6355,6385,8764,10288,10385,10457,10859,56253	ARG2,CD80,IL2RA,IL10,IDO1,CCL8,SDC4,TNFRSF14,LILRB2,BTN2A2,GPNMB,LILRB1,CRTAM	13/98
2_Member	GO Biological Processes	GO:0050672	negative regulation of lymphocyte proliferation	-4.46439	-2.56196	384,941,3559,3586,3620,6385,8764,10288,10385,10457,10859,56253	ARG2,CD80,IL2RA,IL10,IDO1,SDC4,TNFRSF14,LILRB2,BTN2A2,GPNMB,LILRB1,CRTAM	12/89
2_Member	GO Biological Processes	GO:0032945	negative regulation of mononuclear cell proliferation	-4.41526	-2.52673	384,941,3559,3586,3620,6385,8764,10288,10385,10457,10859,56253	ARG2,CD80,IL2RA,IL10,IDO1,SDC4,TNFRSF14,LILRB2,BTN2A2,GPNMB,LILRB1,CRTAM	12/90
3_Member	GO Biological Processes	GO:0002831	regulation of response to biotic stimulus	-18.1705	-14.3027	196,330,384,710,834,912,929,1612,2099,2219,2634,2896,3600,3662,3805,3821,3822,3902,4210,4321,6352,6772,7294,9258,9447,10062,10133,10225,10859,10875,11027,11221,22914,23098,23151,23220,23328,23586,23705,26191,26253,51191,51752,55601,56253,56833,64135,81030,81035,84034,84243,84282,85363,114769,114836,115362,117854,144811,146722,153090,353376,388325,653361	AHR,BIRC3,ARG2,SERPING1,CASP1,CD1D,CD14,DAPK1,ESR1,FCN1,GBP2,GRN,IL15,IRF4,KIR2DL4,KLRC1,KLRC2,LAG3,MEFV,MMP12,CCL5,STAT1,TXK,MFHAS1,AIM2,NR1H3,OPTN,CD96,LILRB1,FGL2,LILRA2,DUSP10,KLRK1,SARM1,GRAMD4,DTX4,SASH1,RIGI,CADM1,PTPN22,CLEC4E,HERC5,ERAP1,DDX60,CRTAM,SLAMF8,IFIH1,ZBP1,COLEC12,EMILIN2,ZDHHC18,RNF135,TRIM5,CARD16,SLAMF6,GBP5,TRIM6,LACC1,CD300LF,DAB2IP,TICAM2,SCIMP,NCF1	63/524
3_Member	GO Biological Processes	GO:0032103	positive regulation of response to external stimulus	-17.8997	-14.1569	834,912,929,940,961,972,1235,1901,2219,2634,2896,3579,3600,3620,3627,3805,3821,3822,3902,3956,4192,4210,4321,5328,5603,5641,5734,6352,6387,6809,7294,7852,8792,8829,9258,9447,10062,10133,11027,22914,23328,23586,23705,26191,26253,26471,51704,55601,56253,64135,81030,81035,84034,84282,85363,90550,91662,114836,115362,117854,144811,146722,353376,353514,388325	CASP1,CD1D,CD14,CD28,CD47,CD74,CCR6,S1PR1,FCN1,GBP2,GRN,CXCR2,IL15,IDO1,CXCL10,KIR2DL4,KLRC1,KLRC2,LAG3,LGALS1,MDK,MEFV,MMP12,PLAU,MAPK13,LGMN,PTGER4,CCL5,CXCL12,STX3,TXK,CXCR4,TNFRSF11A,NRP1,MFHAS1,AIM2,NR1H3,OPTN,LILRA2,KLRK1,SASH1,RIGI,CADM1,PTPN22,CLEC4E,NUPR1,GPRC5B,DDX60,CRTAM,IFIH1,ZBP1,COLEC12,EMILIN2,RNF135,TRIM5,MCU,NLRP12,SLAMF6,GBP5,TRIM6,LACC1,CD300LF,TICAM2,LILRA5,SCIMP	65/561
3_Member	GO Biological Processes	GO:0001819	positive regulation of cytokine production	-16.6615	-13.1617	301,834,916,923,929,940,941,972,1536,2048,2212,2219,3082,3574,3586,3600,3620,3662,3805,4155,4192,4210,4321,4939,5603,5734,5914,6772,7294,7855,8764,9447,9590,10288,10859,11027,11118,11119,22914,23586,23705,26191,26253,51704,56253,64135,84282,91662,91947,114836,115362,117854,144811,163486,192683,255231,353376,353514,388325	ANXA1,CASP1,CD3E,CD6,CD14,CD28,CD80,CD74,CYBB,EPHB2,FCGR2A,FCN1,HGF,IL7,IL10,IL15,IDO1,IRF4,KIR2DL4,MBP,MDK,MEFV,MMP12,OAS2,MAPK13,PTGER4,RARA,STAT1,TXK,FZD5,TNFRSF14,AIM2,AKAP12,LILRB2,LILRB1,LILRA2,BTN3A2,BTN3A1,KLRK1,RIGI,CADM1,PTPN22,CLEC4E,GPRC5B,CRTAM,IFIH1,RNF135,NLRP12,ARRDC4,SLAMF6,GBP5,TRIM6,LACC1,DENND1B,SCAMP5,MCOLN2,TICAM2,LILRA5,SCIMP	59/500
3_Member	GO Biological Processes	GO:0050778	positive regulation of immune response	-15.6733	-12.4076	301,596,710,834,912,916,929,931,940,941,952,972,2219,2359,2533,2634,3586,3600,3620,3805,3821,3822,3902,4210,4321,5914,6352,6461,7006,7042,7294,7855,9258,9447,9840,10062,10384,10385,10451,10673,10859,11027,11118,11119,22914,23586,23705,26191,26253,51324,54537,54718,55601,56253,64135,81030,81035,84282,85363,114836,115362,117854,144811,146722,163486,353376,388325	ANXA1,BCL2,SERPING1,CASP1,CD1D,CD3E,CD14,MS4A1,CD28,CD80,CD38,CD74,FCN1,FPR3,FYB1,GBP2,IL10,IL15,IDO1,KIR2DL4,KLRC1,KLRC2,LAG3,MEFV,MMP12,RARA,CCL5,SHB,TEC,TGFB2,TXK,FZD5,MFHAS1,AIM2,TESPA1,NR1H3,BTN3A3,BTN2A2,VAV3,TNFSF13B,LILRB1,LILRA2,BTN3A2,BTN3A1,KLRK1,RIGI,CADM1,PTPN22,CLEC4E,SPG21,SHLD2,BTN2A3P,DDX60,CRTAM,IFIH1,ZBP1,COLEC12,RNF135,TRIM5,SLAMF6,GBP5,TRIM6,LACC1,CD300LF,DENND1B,TICAM2,SCIMP	67/654
3_Member	GO Biological Processes	GO:0031349	positive regulation of defense response	-15.5342	-12.3354	834,912,929,940,961,2219,2634,2896,3600,3620,3805,3821,3822,3902,3956,4192,4210,4321,5603,5734,6352,7294,8792,9258,9447,10062,10133,11027,22914,23586,23705,26191,26253,26471,51704,55601,56253,64135,81030,81035,84034,84282,85363,91662,114836,115362,117854,144811,146722,353376,353514,388325	CASP1,CD1D,CD14,CD28,CD47,FCN1,GBP2,GRN,IL15,IDO1,KIR2DL4,KLRC1,KLRC2,LAG3,LGALS1,MDK,MEFV,MMP12,MAPK13,PTGER4,CCL5,TXK,TNFRSF11A,MFHAS1,AIM2,NR1H3,OPTN,LILRA2,KLRK1,RIGI,CADM1,PTPN22,CLEC4E,NUPR1,GPRC5B,DDX60,CRTAM,IFIH1,ZBP1,COLEC12,EMILIN2,RNF135,TRIM5,NLRP12,SLAMF6,GBP5,TRIM6,LACC1,CD300LF,TICAM2,LILRA5,SCIMP	52/422
3_Member	GO Biological Processes	GO:0045088	regulation of innate immune response	-14.7748	-11.7309	330,710,834,912,929,2099,2219,2634,2896,3662,3805,3821,3822,3902,4210,4321,6352,7294,9258,9447,10062,10225,10859,11027,11221,22914,23098,23151,23220,23586,23705,26191,26253,51752,55601,56253,56833,64135,81030,81035,84243,84282,85363,114836,115362,117854,144811,146722,153090,353376,388325,653361	BIRC3,SERPING1,CASP1,CD1D,CD14,ESR1,FCN1,GBP2,GRN,IRF4,KIR2DL4,KLRC1,KLRC2,LAG3,MEFV,MMP12,CCL5,TXK,MFHAS1,AIM2,NR1H3,CD96,LILRB1,LILRA2,DUSP10,KLRK1,SARM1,GRAMD4,DTX4,RIGI,CADM1,PTPN22,CLEC4E,ERAP1,DDX60,CRTAM,SLAMF8,IFIH1,ZBP1,COLEC12,ZDHHC18,RNF135,TRIM5,SLAMF6,GBP5,TRIM6,LACC1,CD300LF,DAB2IP,TICAM2,SCIMP,NCF1	52/440
3_Member	GO Biological Processes	GO:0002833	positive regulation of response to biotic stimulus	-12.2243	-9.39788	834,912,929,2219,2634,2896,3805,3821,3822,3902,4210,4321,6352,7294,9258,9447,10062,11027,22914,23328,23586,23705,26191,26253,55601,56253,64135,81030,81035,84034,84282,85363,114836,115362,117854,144811,146722,353376,388325	CASP1,CD1D,CD14,FCN1,GBP2,GRN,KIR2DL4,KLRC1,KLRC2,LAG3,MEFV,MMP12,CCL5,TXK,MFHAS1,AIM2,NR1H3,LILRA2,KLRK1,SASH1,RIGI,CADM1,PTPN22,CLEC4E,DDX60,CRTAM,IFIH1,ZBP1,COLEC12,EMILIN2,RNF135,TRIM5,SLAMF6,GBP5,TRIM6,LACC1,CD300LF,TICAM2,SCIMP	39/307
3_Member	GO Biological Processes	GO:0002764	immune response-regulating signaling pathway	-12.1886	-9.37521	596,834,916,929,931,940,945,952,1512,2219,2359,2533,3821,3822,4210,6461,7006,7294,9447,10288,10384,10385,10451,10859,11027,11118,11119,22914,23586,26191,26253,51324,54718,64135,81035,84282,131450,144811,146722,163486,353376,388325	BCL2,CASP1,CD3E,CD14,MS4A1,CD28,CD33,CD38,CTSH,FCN1,FPR3,FYB1,KLRC1,KLRC2,MEFV,SHB,TEC,TXK,AIM2,LILRB2,BTN3A3,BTN2A2,VAV3,LILRB1,LILRA2,BTN3A2,BTN3A1,KLRK1,RIGI,PTPN22,CLEC4E,SPG21,BTN2A3P,IFIH1,COLEC12,RNF135,CD200R1,LACC1,CD300LF,DENND1B,TICAM2,SCIMP	42/352
3_Member	GO Biological Processes	GO:0045089	positive regulation of innate immune response	-11.4428	-8.75112	834,912,929,2219,2634,3805,3821,3822,3902,4210,4321,6352,7294,9258,9447,10062,11027,22914,23586,23705,26191,26253,55601,56253,64135,81030,81035,84282,85363,114836,115362,117854,144811,146722,353376,388325	CASP1,CD1D,CD14,FCN1,GBP2,KIR2DL4,KLRC1,KLRC2,LAG3,MEFV,MMP12,CCL5,TXK,MFHAS1,AIM2,NR1H3,LILRA2,KLRK1,RIGI,CADM1,PTPN22,CLEC4E,DDX60,CRTAM,IFIH1,ZBP1,COLEC12,RNF135,TRIM5,SLAMF6,GBP5,TRIM6,LACC1,CD300LF,TICAM2,SCIMP	36/281
3_Member	GO Biological Processes	GO:0002253	activation of immune response	-10.905	-8.27611	596,710,834,916,929,931,940,952,2219,2359,2533,2634,3821,3822,4210,6461,7006,7294,9447,10384,10385,10451,11027,11118,11119,22914,23586,26191,26253,51324,54718,64135,81030,81035,84282,85363,115362,144811,146722,163486,353376,388325	BCL2,SERPING1,CASP1,CD3E,CD14,MS4A1,CD28,CD38,FCN1,FPR3,FYB1,GBP2,KLRC1,KLRC2,MEFV,SHB,TEC,TXK,AIM2,BTN3A3,BTN2A2,VAV3,LILRA2,BTN3A2,BTN3A1,KLRK1,RIGI,PTPN22,CLEC4E,SPG21,BTN2A3P,IFIH1,ZBP1,COLEC12,RNF135,TRIM5,GBP5,LACC1,CD300LF,DENND1B,TICAM2,SCIMP	42/385
3_Member	GO Biological Processes	GO:0002757	immune response-activating signaling pathway	-10.4526	-7.86355	596,834,916,929,931,940,952,2219,2359,2533,3821,3822,4210,6461,7006,7294,9447,10384,10385,10451,11027,11118,11119,22914,23586,26191,26253,51324,54718,64135,81035,84282,144811,146722,163486,353376,388325	BCL2,CASP1,CD3E,CD14,MS4A1,CD28,CD38,FCN1,FPR3,FYB1,KLRC1,KLRC2,MEFV,SHB,TEC,TXK,AIM2,BTN3A3,BTN2A2,VAV3,LILRA2,BTN3A2,BTN3A1,KLRK1,RIGI,PTPN22,CLEC4E,SPG21,BTN2A3P,IFIH1,COLEC12,RNF135,LACC1,CD300LF,DENND1B,TICAM2,SCIMP	37/319
3_Member	GO Biological Processes	GO:0002768	immune response-regulating cell surface receptor signaling pathway	-8.41218	-6.03106	596,916,929,931,940,952,2219,2359,2533,3821,3822,6461,7006,7294,10288,10384,10385,10451,10859,11027,11118,11119,22914,26191,26253,51324,54718,131450,163486,353376,388325	BCL2,CD3E,CD14,MS4A1,CD28,CD38,FCN1,FPR3,FYB1,KLRC1,KLRC2,SHB,TEC,TXK,LILRB2,BTN3A3,BTN2A2,VAV3,LILRB1,LILRA2,BTN3A2,BTN3A1,KLRK1,PTPN22,CLEC4E,SPG21,BTN2A3P,CD200R1,DENND1B,TICAM2,SCIMP	31/279
3_Member	GO Biological Processes	GO:0002218	activation of innate immune response	-7.47445	-5.19024	834,929,2219,2634,3821,3822,4210,9447,11027,22914,23586,26253,64135,81030,81035,84282,85363,115362,144811,146722,353376,388325	CASP1,CD14,FCN1,GBP2,KLRC1,KLRC2,MEFV,AIM2,LILRA2,KLRK1,RIGI,CLEC4E,IFIH1,ZBP1,COLEC12,RNF135,TRIM5,GBP5,LACC1,CD300LF,TICAM2,SCIMP	22/167
3_Member	GO Biological Processes	GO:0002429	immune response-activating cell surface receptor signaling pathway	-7.22829	-4.95894	596,916,929,931,940,952,2219,2359,2533,3821,3822,6461,7006,7294,10384,10385,10451,11027,11118,11119,22914,26191,51324,54718,163486,353376,388325	BCL2,CD3E,CD14,MS4A1,CD28,CD38,FCN1,FPR3,FYB1,KLRC1,KLRC2,SHB,TEC,TXK,BTN3A3,BTN2A2,VAV3,LILRA2,BTN3A2,BTN3A1,KLRK1,PTPN22,SPG21,BTN2A3P,DENND1B,TICAM2,SCIMP	27/248
3_Member	GO Biological Processes	GO:0002758	innate immune response-activating signaling pathway	-5.98545	-3.84467	834,929,2219,3821,3822,4210,9447,11027,22914,23586,26253,64135,81035,84282,144811,146722,353376,388325	CASP1,CD14,FCN1,KLRC1,KLRC2,MEFV,AIM2,LILRA2,KLRK1,RIGI,CLEC4E,IFIH1,COLEC12,RNF135,LACC1,CD300LF,TICAM2,SCIMP	18/142
3_Member	GO Biological Processes	GO:0050851	antigen receptor-mediated signaling pathway	-5.27413	-3.22808	596,916,931,940,952,2533,6461,7006,7294,10384,10385,10451,11118,11119,26191,51324,54718,163486	BCL2,CD3E,MS4A1,CD28,CD38,FYB1,SHB,TEC,TXK,BTN3A3,BTN2A2,VAV3,BTN3A2,BTN3A1,PTPN22,SPG21,BTN2A3P,DENND1B	18/159
3_Member	GO Biological Processes	GO:0002221	pattern recognition receptor signaling pathway	-4.34474	-2.47405	834,929,2219,4210,9447,23586,26253,64135,81035,84282,144811,146722,353376,388325	CASP1,CD14,FCN1,MEFV,AIM2,RIGI,CLEC4E,IFIH1,COLEC12,RNF135,LACC1,CD300LF,TICAM2,SCIMP	14/121
3_Member	GO Biological Processes	GO:0050852	T cell receptor signaling pathway	-4.05147	-2.2469	916,940,2533,6461,7006,7294,10384,10385,11118,11119,26191,54718,163486	CD3E,CD28,FYB1,SHB,TEC,TXK,BTN3A3,BTN2A2,BTN3A2,BTN3A1,PTPN22,BTN2A3P,DENND1B	13/113
4_Member	GO Biological Processes	GO:0045321	leukocyte activation	-16.3808	-12.9901	301,430,558,596,912,916,923,931,940,941,952,960,972,1235,1514,1840,2048,2146,2529,2629,2896,3460,3559,3574,3579,3586,3600,3620,3662,3676,3696,3821,3902,3956,4189,4192,4254,5052,5734,6352,6461,7855,9840,9935,10397,10673,10859,10875,11027,11119,22914,22918,25853,26191,26253,50856,56253,56833,57823,64218,64784,114836,116071,161145,202309	ANXA1,ASCL2,AXL,BCL2,CD1D,CD3E,CD6,MS4A1,CD28,CD80,CD38,CD44,CD74,CCR6,CTSL,DTX1,EPHB2,EZH2,FUT7,GBA1,GRN,IFNGR2,IL2RA,IL7,CXCR2,IL10,IL15,IDO1,IRF4,ITGA4,ITGB8,KLRC1,LAG3,LGALS1,DNAJB9,MDK,KITLG,PRDX1,PTGER4,CCL5,SHB,FZD5,TESPA1,MAFB,NDRG1,TNFSF13B,LILRB1,FGL2,LILRA2,BTN3A1,KLRK1,CD93,DCAF12,PTPN22,CLEC4E,CLEC4A,CRTAM,SLAMF8,SLAMF7,SEMA4A,CRTC3,SLAMF6,BATF2,TMEM229B,GAPT	65/601
4_Member	GO Biological Processes	GO:0001775	cell activation	-16.0575	-12.7126	301,430,558,596,912,916,923,928,931,940,941,952,960,972,1235,1465,1514,1840,2048,2146,2529,2629,2896,3460,3559,3574,3579,3586,3600,3620,3627,3662,3676,3696,3821,3902,3956,4189,4192,4254,5052,5734,5912,6352,6461,7450,7855,9590,9840,9935,10397,10451,10673,10859,10875,11027,11119,22914,22918,25853,26191,26253,50856,56253,56833,57823,64218,64784,114836,116071,161145,202309	ANXA1,ASCL2,AXL,BCL2,CD1D,CD3E,CD6,CD9,MS4A1,CD28,CD80,CD38,CD44,CD74,CCR6,CSRP1,CTSL,DTX1,EPHB2,EZH2,FUT7,GBA1,GRN,IFNGR2,IL2RA,IL7,CXCR2,IL10,IL15,IDO1,CXCL10,IRF4,ITGA4,ITGB8,KLRC1,LAG3,LGALS1,DNAJB9,MDK,KITLG,PRDX1,PTGER4,RAP2B,CCL5,SHB,VWF,FZD5,AKAP12,TESPA1,MAFB,NDRG1,VAV3,TNFSF13B,LILRB1,FGL2,LILRA2,BTN3A1,KLRK1,CD93,DCAF12,PTPN22,CLEC4E,CLEC4A,CRTAM,SLAMF8,SLAMF7,SEMA4A,CRTC3,SLAMF6,BATF2…	72/726
4_Member	GO Biological Processes	GO:0046649	lymphocyte activation	-14.4857	-11.4631	301,430,558,596,912,916,923,931,940,941,952,960,972,1235,1514,1840,2048,2146,2529,2629,3559,3574,3586,3600,3620,3662,3676,3821,3902,3956,4189,4192,4254,5052,5734,6461,7855,9840,9935,10673,10859,10875,11119,22914,25853,26191,26253,50856,56253,56833,57823,64218,114836,202309	ANXA1,ASCL2,AXL,BCL2,CD1D,CD3E,CD6,MS4A1,CD28,CD80,CD38,CD44,CD74,CCR6,CTSL,DTX1,EPHB2,EZH2,FUT7,GBA1,IL2RA,IL7,IL10,IL15,IDO1,IRF4,ITGA4,KLRC1,LAG3,LGALS1,DNAJB9,MDK,KITLG,PRDX1,PTGER4,SHB,FZD5,TESPA1,MAFB,TNFSF13B,LILRB1,FGL2,BTN3A1,KLRK1,DCAF12,PTPN22,CLEC4E,CLEC4A,CRTAM,SLAMF8,SLAMF7,SEMA4A,SLAMF6,GAPT	54/478
4_Member	GO Biological Processes	GO:0030097	hemopoiesis	-12.6689	-9.7554	87,301,302,430,558,596,675,799,864,912,916,931,940,972,1235,1514,1840,2034,2146,2235,2529,2629,3213,3214,3574,3586,3600,3662,3676,3696,3821,3956,4189,4254,4286,4300,5734,6461,6708,7042,7153,7351,7855,8651,8792,8879,9258,9644,9833,9840,9935,10673,10859,26191,26253,29887,56833,64218,114836,115761,116071,135228,157570	ACTN1,ANXA1,ANXA2,ASCL2,AXL,BCL2,BRCA2,CALCR,RUNX3,CD1D,CD3E,MS4A1,CD28,CD74,CCR6,CTSL,DTX1,EPAS1,EZH2,FECH,FUT7,GBA1,HOXB3,HOXB4,IL7,IL10,IL15,IRF4,ITGA4,ITGB8,KLRC1,LGALS1,DNAJB9,KITLG,MITF,MLLT3,PTGER4,SHB,SPTA1,TGFB2,TOP2A,UCP2,FZD5,SOCS1,TNFRSF11A,SGPL1,MFHAS1,SH3PXD2A,MELK,TESPA1,MAFB,TNFSF13B,LILRB1,PTPN22,CLEC4E,SNX10,SLAMF8,SEMA4A,SLAMF6,ARL11,BATF2,CD109,ESCO2	63/683
4_Member	GO Biological Processes	GO:0002521	leukocyte differentiation	-11.8355	-9.05878	301,302,430,558,596,799,912,916,931,940,972,1235,1514,1840,2146,2529,2629,3574,3586,3600,3662,3676,3696,3821,3956,4189,4254,4286,5734,7351,7855,8651,8792,9644,9840,9935,10673,10859,26191,26253,29887,56833,64218,114836,116071,135228	ANXA1,ANXA2,ASCL2,AXL,BCL2,CALCR,CD1D,CD3E,MS4A1,CD28,CD74,CCR6,CTSL,DTX1,EZH2,FUT7,GBA1,IL7,IL10,IL15,IRF4,ITGA4,ITGB8,KLRC1,LGALS1,DNAJB9,KITLG,MITF,PTGER4,UCP2,FZD5,SOCS1,TNFRSF11A,SH3PXD2A,TESPA1,MAFB,TNFSF13B,LILRB1,PTPN22,CLEC4E,SNX10,SLAMF8,SEMA4A,SLAMF6,BATF2,CD109	46/423
4_Member	GO Biological Processes	GO:0042110	T cell activation	-11.7383	-8.98605	301,430,596,912,916,940,941,960,972,1235,1514,1840,2529,2629,3559,3574,3600,3620,3662,3821,3902,4192,4254,5734,7855,9840,9935,10673,10859,10875,11119,25853,26191,26253,50856,56253,57823,64218,114836	ANXA1,ASCL2,BCL2,CD1D,CD3E,CD28,CD80,CD44,CD74,CCR6,CTSL,DTX1,FUT7,GBA1,IL2RA,IL7,IL15,IDO1,IRF4,KLRC1,LAG3,MDK,KITLG,PTGER4,FZD5,TESPA1,MAFB,TNFSF13B,LILRB1,FGL2,BTN3A1,DCAF12,PTPN22,CLEC4E,CLEC4A,CRTAM,SLAMF7,SEMA4A,SLAMF6	39/318
4_Member	GO Biological Processes	GO:1903131	mononuclear cell differentiation	-9.40354	-6.91597	301,430,558,596,912,916,931,940,972,1235,1514,1840,2146,2529,2629,3574,3586,3600,3662,3676,3696,3821,3956,4189,5734,7855,9840,9935,10673,10859,26191,26253,56833,64218,114836,116071	ANXA1,ASCL2,AXL,BCL2,CD1D,CD3E,MS4A1,CD28,CD74,CCR6,CTSL,DTX1,EZH2,FUT7,GBA1,IL7,IL10,IL15,IRF4,ITGA4,ITGB8,KLRC1,LGALS1,DNAJB9,PTGER4,FZD5,TESPA1,MAFB,TNFSF13B,LILRB1,PTPN22,CLEC4E,SLAMF8,SEMA4A,SLAMF6,BATF2	36/331
4_Member	GO Biological Processes	GO:0030098	lymphocyte differentiation	-9.21745	-6.75526	301,430,558,596,912,916,931,940,972,1235,1514,1840,2146,2529,2629,3574,3586,3600,3662,3676,3821,3956,4189,5734,7855,9840,9935,10673,26191,26253,56833,64218,114836	ANXA1,ASCL2,AXL,BCL2,CD1D,CD3E,MS4A1,CD28,CD74,CCR6,CTSL,DTX1,EZH2,FUT7,GBA1,IL7,IL10,IL15,IRF4,ITGA4,KLRC1,LGALS1,DNAJB9,PTGER4,FZD5,TESPA1,MAFB,TNFSF13B,PTPN22,CLEC4E,SLAMF8,SEMA4A,SLAMF6	33/289
4_Member	GO Biological Processes	GO:0030217	T cell differentiation	-8.1497	-5.78707	301,430,596,912,916,940,972,1235,1514,1840,2529,2629,3574,3600,3662,3821,5734,7855,9840,9935,26191,26253,64218,114836	ANXA1,ASCL2,BCL2,CD1D,CD3E,CD28,CD74,CCR6,CTSL,DTX1,FUT7,GBA1,IL7,IL15,IRF4,KLRC1,PTGER4,FZD5,TESPA1,MAFB,PTPN22,CLEC4E,SEMA4A,SLAMF6	24/181
4_Member	GO Biological Processes	GO:0033077	T cell differentiation in thymus	-3.63072	-1.92927	596,916,940,972,1235,2629,7855,9840,9935	BCL2,CD3E,CD28,CD74,CCR6,GBA1,FZD5,TESPA1,MAFB	9/64
5_Member	Reactome Gene Sets	R-HSA-1280218	Adaptive Immune System	-15.8137	-12.5102	912,916,929,940,941,945,972,991,1062,1175,1211,1509,1512,1514,1536,2533,3676,3805,3821,3832,3902,4689,5567,5641,5698,6402,6614,7314,7332,8651,8655,8764,8905,9246,9398,9554,9976,10112,10225,10288,10384,10385,10533,10859,10990,11024,11027,11059,11065,11118,11119,22914,25780,25847,26191,30835,51191,51348,51752,56253,56992,57823,64167,64750,81035,81930,90293,114836,114876,131450,146722,342510,353514,…	CD1D,CD3E,CD14,CD28,CD80,CD33,CD74,CDC20,CENPE,AP2S1,CLTA,CTSD,CTSH,CTSL,CYBB,FYB1,ITGA4,KIR2DL4,KLRC1,KIF11,LAG3,NCF4,PRKACB,LGMN,PSMB9,SELL,SIGLEC1,UBB,UBE2L3,SOCS1,DYNLL1,TNFRSF14,AP1S2,UBE2L6,CD101,SEC22B,CLEC2B,KIF20A,CD96,LILRB2,BTN3A3,BTN2A2,ATG7,LILRB1,LILRB5,LILRA1,LILRA2,WWP1,UBE2C,BTN3A2,BTN3A1,KLRK1,RASGRP3,ANAPC13,PTPN22,CD209,HERC5,KLRF1,ERAP1,CRTAM,KIF15,SLAMF7,ERAP2,SMURF2,COLEC12…	74/768
5_Member	Reactome Gene Sets	R-HSA-198933	Immunoregulatory interactions between a Lymphoid and a non-Lymphoid cell	-11.8204	-9.05527	912,916,945,3676,3805,3821,6402,6614,9976,10225,10288,10859,10990,11024,11027,22914,51348,56253,57823,81035,114836,131450,146722,342510,353514	CD1D,CD3E,CD33,ITGA4,KIR2DL4,KLRC1,SELL,SIGLEC1,CLEC2B,CD96,LILRB2,LILRB1,LILRB5,LILRA1,LILRA2,KLRK1,KLRF1,CRTAM,SLAMF7,COLEC12,SLAMF6,CD200R1,CD300LF,CD300E,LILRA5	25/133
6_Member	GO Biological Processes	GO:0009617	response to bacterium	-15.4902	-12.3214	19,54,196,558,575,664,834,840,912,923,929,931,941,968,1910,2048,2633,2634,2635,2919,2921,3454,3586,3620,3627,4069,4283,4939,5618,5734,5914,6035,6039,6373,6584,7431,7855,8564,8764,8792,9076,9516,9590,10062,10133,10225,10288,10561,10859,11145,11221,22914,26191,26253,26503,51316,51752,55026,55603,56833,81035,114769,115361,115362,117854,132299,153090,161145,219972,353376	ABCA1,ACP5,AHR,AXL,ADGRB1,BNIP3,CASP1,CASP7,CD1D,CD6,CD14,MS4A1,CD80,CD68,EDNRB,EPHB2,GBP1,GBP2,GBP3,CXCL1,CXCL3,IFNAR1,IL10,IDO1,CXCL10,LYZ,CXCL9,OAS2,PRLR,PTGER4,RARA,RNASE1,RNASE6,CXCL11,SLC22A5,VIM,FZD5,KMO,TNFRSF14,TNFRSF11A,CLDN1,LITAF,AKAP12,NR1H3,OPTN,CD96,LILRB2,IFI44,LILRB1,PLAAT3,DUSP10,KLRK1,PTPN22,CLEC4E,SLC17A5,PLAC8,ERAP1,TMEM255A,TENT5A,SLAMF8,COLEC12,CARD16,GBP4,GBP5,TRIM6,OCIAD2…	70/710
6_Member	GO Biological Processes	GO:0002237	response to molecule of bacterial origin	-12.7319	-9.78664	19,54,196,558,834,840,923,929,941,968,1910,2048,2634,2635,2919,2921,3454,3586,3620,3627,4283,5734,5914,6373,7431,7855,8564,8792,9076,9516,9590,10062,10225,10288,10859,11221,22914,26191,114769,115362,117854,153090,353376	ABCA1,ACP5,AHR,AXL,CASP1,CASP7,CD6,CD14,CD80,CD68,EDNRB,EPHB2,GBP2,GBP3,CXCL1,CXCL3,IFNAR1,IL10,IDO1,CXCL10,CXCL9,PTGER4,RARA,CXCL11,VIM,FZD5,KMO,TNFRSF11A,CLDN1,LITAF,AKAP12,NR1H3,CD96,LILRB2,LILRB1,DUSP10,KLRK1,PTPN22,CARD16,GBP5,TRIM6,DAB2IP,TICAM2	43/354
6_Member	GO Biological Processes	GO:0071219	cellular response to molecule of bacterial origin	-12.4044	-9.53661	19,196,558,834,840,923,929,941,968,1910,2048,2634,2635,2919,2921,3586,3627,4283,5914,6373,7431,7855,8564,9516,10062,10288,10859,22914,26191,114769,115362,153090,353376	ABCA1,AHR,AXL,CASP1,CASP7,CD6,CD14,CD80,CD68,EDNRB,EPHB2,GBP2,GBP3,CXCL1,CXCL3,IL10,CXCL10,CXCL9,RARA,CXCL11,VIM,FZD5,KMO,LITAF,NR1H3,LILRB2,LILRB1,KLRK1,PTPN22,CARD16,GBP5,DAB2IP,TICAM2	33/221
6_Member	GO Biological Processes	GO:0032496	response to lipopolysaccharide	-12.3638	-9.51029	19,54,558,834,840,923,929,941,968,1910,2048,2634,2635,2919,2921,3454,3586,3620,3627,4283,5734,5914,6373,7431,8564,8792,9076,9516,9590,10062,10225,10288,10859,11221,22914,26191,114769,115362,117854,153090,353376	ABCA1,ACP5,AXL,CASP1,CASP7,CD6,CD14,CD80,CD68,EDNRB,EPHB2,GBP2,GBP3,CXCL1,CXCL3,IFNAR1,IL10,IDO1,CXCL10,CXCL9,PTGER4,RARA,CXCL11,VIM,KMO,TNFRSF11A,CLDN1,LITAF,AKAP12,NR1H3,CD96,LILRB2,LILRB1,DUSP10,KLRK1,PTPN22,CARD16,GBP5,TRIM6,DAB2IP,TICAM2	41/333
6_Member	GO Biological Processes	GO:0071216	cellular response to biotic stimulus	-11.7289	-8.98605	19,196,558,834,840,923,929,941,968,1910,2048,2634,2635,2919,2921,3586,3627,4283,5914,6373,7431,7855,8564,9516,10062,10288,10859,22914,26191,114769,115362,153090,353376,388325	ABCA1,AHR,AXL,CASP1,CASP7,CD6,CD14,CD80,CD68,EDNRB,EPHB2,GBP2,GBP3,CXCL1,CXCL3,IL10,CXCL10,CXCL9,RARA,CXCL11,VIM,FZD5,KMO,LITAF,NR1H3,LILRB2,LILRB1,KLRK1,PTPN22,CARD16,GBP5,DAB2IP,TICAM2,SCIMP	34/247
6_Member	GO Biological Processes	GO:0071222	cellular response to lipopolysaccharide	-11.6711	-8.94942	19,558,834,840,923,929,941,968,1910,2048,2634,2635,2919,2921,3586,3627,4283,5914,6373,7431,8564,9516,10062,10288,10859,22914,26191,114769,115362,153090,353376	ABCA1,AXL,CASP1,CASP7,CD6,CD14,CD80,CD68,EDNRB,EPHB2,GBP2,GBP3,CXCL1,CXCL3,IL10,CXCL10,CXCL9,RARA,CXCL11,VIM,KMO,LITAF,NR1H3,LILRB2,LILRB1,KLRK1,PTPN22,CARD16,GBP5,DAB2IP,TICAM2	31/208
6_Member	GO Biological Processes	GO:0071396	cellular response to lipid	-7.94639	-5.61852	19,196,301,558,834,840,923,929,941,968,1374,1393,1646,1910,2048,2099,2235,2634,2635,2919,2921,3586,3627,4283,5031,5734,5914,6373,7332,7431,7533,8564,9076,9516,10062,10288,10859,22914,26191,81930,114769,115362,153090,353376,653361	ABCA1,AHR,ANXA1,AXL,CASP1,CASP7,CD6,CD14,CD80,CD68,CPT1A,CRHBP,AKR1C2,EDNRB,EPHB2,ESR1,FECH,GBP2,GBP3,CXCL1,CXCL3,IL10,CXCL10,CXCL9,P2RY6,PTGER4,RARA,CXCL11,UBE2L3,VIM,YWHAH,KMO,CLDN1,LITAF,NR1H3,LILRB2,LILRB1,KLRK1,PTPN22,KIF18A,CARD16,GBP5,DAB2IP,TICAM2,NCF1	45/536
7_Member	GO Biological Processes	GO:0002697	regulation of immune effector process	-15.2329	-12.0921	54,196,301,430,558,710,912,940,941,972,1379,2048,2219,2529,2896,3586,3662,3805,3821,3822,3902,3958,4189,5914,6461,7042,7855,8764,9516,10225,10859,10875,11221,22914,23586,23705,51704,54537,55601,56253,56833,114836,117854,144811,163486,257101,353376,388325,653361	ACP5,AHR,ANXA1,ASCL2,AXL,SERPING1,CD1D,CD28,CD80,CD74,CR1L,EPHB2,FCN1,FUT7,GRN,IL10,IRF4,KIR2DL4,KLRC1,KLRC2,LAG3,LGALS3,DNAJB9,RARA,SHB,TGFB2,FZD5,TNFRSF14,LITAF,CD96,LILRB1,FGL2,DUSP10,KLRK1,RIGI,CADM1,GPRC5B,SHLD2,DDX60,CRTAM,SLAMF8,SLAMF6,TRIM6,LACC1,DENND1B,ZNF683,TICAM2,SCIMP,NCF1	49/385
7_Member	GO Biological Processes	GO:0002699	positive regulation of immune effector process	-9.28612	-6.81627	301,912,940,941,972,2048,2219,3586,3805,3821,3822,3902,4189,5914,6461,7855,8764,10859,22914,23586,23705,51704,54537,55601,56253,114836,117854,144811,163486,353376,388325	ANXA1,CD1D,CD28,CD80,CD74,EPHB2,FCN1,IL10,KIR2DL4,KLRC1,KLRC2,LAG3,DNAJB9,RARA,SHB,FZD5,TNFRSF14,LILRB1,KLRK1,RIGI,CADM1,GPRC5B,SHLD2,DDX60,CRTAM,SLAMF6,TRIM6,LACC1,DENND1B,TICAM2,SCIMP	31/257
7_Member	GO Biological Processes	GO:0002718	regulation of cytokine production involved in immune response	-7.10149	-4.83938	54,558,972,3586,3805,7042,7855,8764,9516,10225,10859,23586,51704,117854,144811,163486,353376,388325	ACP5,AXL,CD74,IL10,KIR2DL4,TGFB2,FZD5,TNFRSF14,LITAF,CD96,LILRB1,RIGI,GPRC5B,TRIM6,LACC1,DENND1B,TICAM2,SCIMP	18/120
7_Member	GO Biological Processes	GO:0002700	regulation of production of molecular mediator of immune response	-6.59318	-4.38816	54,558,940,972,2048,3586,3805,4189,7042,7855,8764,9516,10225,10859,23586,51704,54537,117854,144811,163486,353376,388325	ACP5,AXL,CD28,CD74,EPHB2,IL10,KIR2DL4,DNAJB9,TGFB2,FZD5,TNFRSF14,LITAF,CD96,LILRB1,RIGI,GPRC5B,SHLD2,TRIM6,LACC1,DENND1B,TICAM2,SCIMP	22/187
7_Member	GO Biological Processes	GO:0002702	positive regulation of production of molecular mediator of immune response	-5.69356	-3.58671	940,972,2048,3586,3805,4189,7855,8764,10859,23586,51704,54537,117854,144811,163486,353376,388325	CD28,CD74,EPHB2,IL10,KIR2DL4,DNAJB9,FZD5,TNFRSF14,LILRB1,RIGI,GPRC5B,SHLD2,TRIM6,LACC1,DENND1B,TICAM2,SCIMP	17/134
7_Member	GO Biological Processes	GO:0002720	positive regulation of cytokine production involved in immune response	-4.88595	-2.89898	972,3805,7855,8764,10859,23586,51704,117854,144811,163486,353376,388325	CD74,KIR2DL4,FZD5,TNFRSF14,LILRB1,RIGI,GPRC5B,TRIM6,LACC1,DENND1B,TICAM2,SCIMP	12/81
7_Member	GO Biological Processes	GO:0002819	regulation of adaptive immune response	-3.74649	-2.01543	196,301,430,912,940,941,1379,2048,2529,3586,3821,7855,8764,10673,10859,11221,54537,163486	AHR,ANXA1,ASCL2,CD1D,CD28,CD80,CR1L,EPHB2,FUT7,IL10,KLRC1,FZD5,TNFRSF14,TNFSF13B,LILRB1,DUSP10,SHLD2,DENND1B	18/207
7_Member	GO Biological Processes	GO:0002822	regulation of adaptive immune response based on somatic recombination of immune receptors built from immunoglobulin superfamily domains	-3.19372	-1.60758	196,301,430,912,940,941,1379,2048,2529,3586,3821,7855,10673,10859,54537,163486	AHR,ANXA1,ASCL2,CD1D,CD28,CD80,CR1L,EPHB2,FUT7,IL10,KLRC1,FZD5,TNFSF13B,LILRB1,SHLD2,DENND1B	16/192
8_Member	GO Biological Processes	GO:0071345	cellular response to cytokine stimulus	-15.1532	-12.0387	19,330,471,558,834,960,961,972,1235,1393,1612,1840,2317,2629,2633,2634,2635,2919,2921,3429,3434,3454,3455,3460,3559,3560,3574,3579,3600,3627,3676,4283,4904,4939,5603,5618,6352,6355,6373,6387,6772,7431,7852,8564,8651,8764,8792,8828,9034,9076,9447,9472,9590,9705,10288,10673,10859,11024,11027,22808,29887,57007,64135,91662,115361,115362,117854,146722,153090,285180,353514	ABCA1,BIRC3,ATIC,AXL,CASP1,CD44,CD47,CD74,CCR6,CRHBP,DAPK1,DTX1,FLNB,GBA1,GBP1,GBP2,GBP3,CXCL1,CXCL3,IFI27,IFIT1,IFNAR1,IFNAR2,IFNGR2,IL2RA,IL2RB,IL7,CXCR2,IL15,CXCL10,ITGA4,CXCL9,YBX1,OAS2,MAPK13,PRLR,CCL5,CCL8,CXCL11,CXCL12,STAT1,VIM,CXCR4,KMO,SOCS1,TNFRSF14,TNFRSF11A,NRP2,CCRL2,CLDN1,AIM2,AKAP6,AKAP12,ST18,LILRB2,TNFSF13B,LILRB1,LILRA1,LILRA2,MRAS,SNX10,ACKR3,IFIH1,NLRP12,GBP4,GBP5,TRIM6,CD300…	71/738
8_Member	WikiPathways	WP5115	Network map of SARS CoV 2 signaling pathway	-12.5753	-9.6928	196,891,916,929,1235,1509,1514,2335,2919,2921,3429,3434,3574,3579,3586,3627,3959,4086,4283,4939,6241,6352,6355,6387,6772,8542,8743,9133,9332,10379,11119,23586,64135	AHR,CCNB1,CD3E,CD14,CCR6,CTSD,CTSL,FN1,CXCL1,CXCL3,IFI27,IFIT1,IL7,CXCR2,IL10,CXCL10,LGALS3BP,SMAD1,CXCL9,OAS2,RRM2,CCL5,CCL8,CXCL12,STAT1,APOL1,TNFSF10,CCNB2,CD163,IRF9,BTN3A1,RIGI,IFIH1	33/218
8_Member	GO Biological Processes	GO:0019221	cytokine-mediated signaling pathway	-9.73715	-7.20516	330,960,972,1235,2919,2921,3429,3454,3455,3460,3559,3560,3574,3579,3600,3627,4283,4939,5618,6352,6355,6373,6387,6772,7852,8651,8764,8792,9034,9447,9705,10288,10673,10859,11024,11027,57007,64135,146722,353514	BIRC3,CD44,CD74,CCR6,CXCL1,CXCL3,IFI27,IFNAR1,IFNAR2,IFNGR2,IL2RA,IL2RB,IL7,CXCR2,IL15,CXCL10,CXCL9,OAS2,PRLR,CCL5,CCL8,CXCL11,CXCL12,STAT1,CXCR4,SOCS1,TNFRSF14,TNFRSF11A,CCRL2,AIM2,ST18,LILRB2,TNFSF13B,LILRB1,LILRA1,LILRA2,ACKR3,IFIH1,CD300LF,LILRA5	40/386
9_Member	Canonical Pathways	M5885	NABA MATRISOME ASSOCIATED	-11.3357	-8.66285	301,302,710,1393,1509,1512,1514,2162,2219,2239,2919,2921,3082,3574,3586,3600,3627,3956,3958,4192,4254,4283,4321,4322,4323,4324,5328,5361,6275,6277,6281,6352,6355,6373,6383,6385,6387,6424,6768,7042,7062,8743,8974,9672,9966,9976,10154,10462,10505,10509,10673,26253,27151,27299,30835,50856,51267,57125,64218,81035,85329,135228,165530,388697	ANXA1,ANXA2,SERPING1,CRHBP,CTSD,CTSH,CTSL,F13A1,FCN1,GPC4,CXCL1,CXCL3,HGF,IL7,IL10,IL15,CXCL10,LGALS1,LGALS3,MDK,KITLG,CXCL9,MMP12,MMP13,MMP14,MMP15,PLAU,PLXNA1,S100A4,S100A6,S100A10,CCL5,CCL8,CXCL11,SDC2,SDC4,CXCL12,SFRP4,ST14,TGFB2,TCHH,TNFSF10,P4HA2,SDC3,TNFSF15,CLEC2B,PLXNC1,CLEC10A,SEMA4F,SEMA4B,TNFSF13B,CLEC4E,CPAMD8,ADAMDEC1,CD209,CLEC4A,CLEC1A,PLXDC1,SEMA4A,COLEC12,LGALS12,CD109,CLEC4F,HR…	64/751
9_Member	Canonical Pathways	M5880	NABA ECM AFFILIATED	-8.70154	-6.29616	301,302,2219,2239,3956,3958,5361,6383,6385,9672,9976,10154,10462,10505,10509,26253,30835,50856,51267,57125,64218,81035,85329,165530	ANXA1,ANXA2,FCN1,GPC4,LGALS1,LGALS3,PLXNA1,SDC2,SDC4,SDC3,CLEC2B,PLXNC1,CLEC10A,SEMA4F,SEMA4B,CLEC4E,CD209,CLEC4A,CLEC1A,PLXDC1,SEMA4A,COLEC12,LGALS12,CLEC4F	24/170
10_Member	GO Biological Processes	GO:0050900	leukocyte migration	-11.1413	-8.49534	301,1235,1901,1910,2529,2629,2650,2919,2921,3579,3586,3627,3672,3676,3958,4192,4254,4283,5175,5800,6352,6355,6373,6402,7042,7852,8792,10451,50848,56253,56833,91662,255231	ANXA1,CCR6,S1PR1,EDNRB,FUT7,GBA1,GCNT1,CXCL1,CXCL3,CXCR2,IL10,CXCL10,ITGA1,ITGA4,LGALS3,MDK,KITLG,CXCL9,PECAM1,PTPRO,CCL5,CCL8,CXCL11,SELL,TGFB2,CXCR4,TNFRSF11A,VAV3,F11R,CRTAM,SLAMF8,NLRP12,MCOLN2	33/245
10_Member	GO Biological Processes	GO:0006935	chemotaxis	-10.0874	-7.52064	301,1235,1901,1910,2359,2919,2921,3082,3579,3586,3627,3672,3958,4192,4283,5328,5800,6091,6275,6352,6355,6373,6387,7042,7852,8792,8828,8829,9034,10451,10457,10505,10509,27237,56833,57007,64218,113540	ANXA1,CCR6,S1PR1,EDNRB,FPR3,CXCL1,CXCL3,HGF,CXCR2,IL10,CXCL10,ITGA1,LGALS3,MDK,CXCL9,PLAU,PTPRO,ROBO1,S100A4,CCL5,CCL8,CXCL11,CXCL12,TGFB2,CXCR4,TNFRSF11A,NRP2,NRP1,CCRL2,VAV3,GPNMB,SEMA4F,SEMA4B,ARHGEF16,SLAMF8,ACKR3,SEMA4A,CMTM1	38/344
10_Member	GO Biological Processes	GO:0042330	taxis	-10.0134	-7.46091	301,1235,1901,1910,2359,2919,2921,3082,3579,3586,3627,3672,3958,4192,4283,5328,5800,6091,6275,6352,6355,6373,6387,7042,7852,8792,8828,8829,9034,10451,10457,10505,10509,27237,56833,57007,64218,113540	ANXA1,CCR6,S1PR1,EDNRB,FPR3,CXCL1,CXCL3,HGF,CXCR2,IL10,CXCL10,ITGA1,LGALS3,MDK,CXCL9,PLAU,PTPRO,ROBO1,S100A4,CCL5,CCL8,CXCL11,CXCL12,TGFB2,CXCR4,TNFRSF11A,NRP2,NRP1,CCRL2,VAV3,GPNMB,SEMA4F,SEMA4B,ARHGEF16,SLAMF8,ACKR3,SEMA4A,CMTM1	38/346
10_Member	GO Biological Processes	GO:0040011	locomotion	-9.30648	-6.83081	301,1235,1901,1910,2359,2919,2921,3082,3579,3586,3627,3672,3958,4192,4283,5328,5800,6091,6275,6352,6355,6373,6387,7042,7852,8792,8828,8829,9034,10451,10457,10505,10509,27237,56833,57007,64218,113540	ANXA1,CCR6,S1PR1,EDNRB,FPR3,CXCL1,CXCL3,HGF,CXCR2,IL10,CXCL10,ITGA1,LGALS3,MDK,CXCL9,PLAU,PTPRO,ROBO1,S100A4,CCL5,CCL8,CXCL11,CXCL12,TGFB2,CXCR4,TNFRSF11A,NRP2,NRP1,CCRL2,VAV3,GPNMB,SEMA4F,SEMA4B,ARHGEF16,SLAMF8,ACKR3,SEMA4A,CMTM1	38/366
10_Member	GO Biological Processes	GO:0060326	cell chemotaxis	-9.21367	-6.75526	301,1235,1901,1910,2919,2921,3082,3579,3586,3627,3672,3958,4192,4283,5800,6352,6355,6373,6387,7042,7852,8792,8829,9034,10451,27237,56833,57007	ANXA1,CCR6,S1PR1,EDNRB,CXCL1,CXCL3,HGF,CXCR2,IL10,CXCL10,ITGA1,LGALS3,MDK,CXCL9,PTPRO,CCL5,CCL8,CXCL11,CXCL12,TGFB2,CXCR4,TNFRSF11A,NRP1,CCRL2,VAV3,ARHGEF16,SLAMF8,ACKR3	28/215
10_Member	WikiPathways	WP5039	SARS CoV 2 innate immunity evasion and cell specific immune response	-8.54804	-6.15738	2919,2921,3433,3454,3455,3579,3586,3627,3902,4283,6352,6373,6387,6772,23586	CXCL1,CXCL3,IFIT2,IFNAR1,IFNAR2,CXCR2,IL10,CXCL10,LAG3,CXCL9,CCL5,CXCL11,CXCL12,STAT1,RIGI	15/66
10_Member	GO Biological Processes	GO:0030595	leukocyte chemotaxis	-8.45713	-6.07127	301,1235,1901,1910,2919,2921,3579,3586,3627,3672,3958,4192,4283,5800,6352,6355,6373,7042,7852,8792,10451,56833	ANXA1,CCR6,S1PR1,EDNRB,CXCL1,CXCL3,CXCR2,IL10,CXCL10,ITGA1,LGALS3,MDK,CXCL9,PTPRO,CCL5,CCL8,CXCL11,TGFB2,CXCR4,TNFRSF11A,VAV3,SLAMF8	22/148
10_Member	KEGG Pathway	hsa04061	Viral protein interaction with cytokine and cytokine receptor	-7.56664	-5.27481	1235,2919,2921,3559,3560,3579,3586,3627,4283,6352,6355,6373,6387,7852,8743,8764,57007	CCR6,CXCL1,CXCL3,IL2RA,IL2RB,CXCR2,IL10,CXCL10,CXCL9,CCL5,CCL8,CXCL11,CXCL12,CXCR4,TNFSF10,TNFRSF14,ACKR3	17/100
10_Member	GO Biological Processes	GO:0071674	mononuclear cell migration	-7.45454	-5.17421	301,1235,1901,2529,2629,3579,3627,3958,5175,5800,6352,6355,6373,7852,8792,50848,56253,91662	ANXA1,CCR6,S1PR1,FUT7,GBA1,CXCR2,CXCL10,LGALS3,PECAM1,PTPRO,CCL5,CCL8,CXCL11,CXCR4,TNFRSF11A,F11R,CRTAM,NLRP12	18/114
10_Member	GO Biological Processes	GO:0097529	myeloid leukocyte migration	-6.80091	-4.5666	301,1910,2919,2921,3579,3627,3672,3958,4254,4283,5175,5800,6352,6355,6373,7042,8792,10451,255231	ANXA1,EDNRB,CXCL1,CXCL3,CXCR2,CXCL10,ITGA1,LGALS3,KITLG,CXCL9,PECAM1,PTPRO,CCL5,CCL8,CXCL11,TGFB2,TNFRSF11A,VAV3,MCOLN2	19/139
10_Member	KEGG Pathway	hsa04060	Cytokine-cytokine receptor interaction	-6.68553	-4.46448	94,1235,2919,2921,3454,3455,3460,3559,3560,3574,3579,3586,3600,3627,4283,5618,6352,6355,6373,6387,7042,7852,8743,8764,8792,9966,10673,57007,768211	ACVRL1,CCR6,CXCL1,CXCL3,IFNAR1,IFNAR2,IFNGR2,IL2RA,IL2RB,IL7,CXCR2,IL10,IL15,CXCL10,CXCL9,PRLR,CCL5,CCL8,CXCL11,CXCL12,TGFB2,CXCR4,TNFSF10,TNFRSF14,TNFRSF11A,TNFSF15,TNFSF13B,ACKR3,RELL1	29/297
10_Member	Reactome Gene Sets	R-HSA-380108	Chemokine receptors bind chemokines	-6.39874	-4.20305	1235,2919,2921,3579,3627,4283,6352,6373,6387,7852,9034,57007	CCR6,CXCL1,CXCL3,CXCR2,CXCL10,CXCL9,CCL5,CXCL11,CXCL12,CXCR4,CCRL2,ACKR3	12/59
10_Member	GO Biological Processes	GO:0097530	granulocyte migration	-6.02482	-3.87857	301,2919,2921,3579,3627,3672,3958,4283,5175,6352,6355,6373,7042,10451,255231	ANXA1,CXCL1,CXCL3,CXCR2,CXCL10,ITGA1,LGALS3,CXCL9,PECAM1,CCL5,CCL8,CXCL11,TGFB2,VAV3,MCOLN2	15/100
10_Member	GO Biological Processes	GO:1990266	neutrophil migration	-5.74154	-3.62194	2919,2921,3579,3627,3672,3958,4283,5175,6352,6355,6373,7042,10451,255231	CXCL1,CXCL3,CXCR2,CXCL10,ITGA1,LGALS3,CXCL9,PECAM1,CCL5,CCL8,CXCL11,TGFB2,VAV3,MCOLN2	14/92
10_Member	GO Biological Processes	GO:0070098	chemokine-mediated signaling pathway	-5.45933	-3.37688	1235,2919,2921,3579,3627,4283,6352,6355,6373,6387,7852,9034,57007	CCR6,CXCL1,CXCL3,CXCR2,CXCL10,CXCL9,CCL5,CCL8,CXCL11,CXCL12,CXCR4,CCRL2,ACKR3	13/84
10_Member	GO Biological Processes	GO:0071621	granulocyte chemotaxis	-5.34234	-3.28969	301,2919,2921,3579,3627,3672,3958,4283,6352,6355,6373,7042,10451	ANXA1,CXCL1,CXCL3,CXCR2,CXCL10,ITGA1,LGALS3,CXCL9,CCL5,CCL8,CXCL11,TGFB2,VAV3	13/86
10_Member	GO Biological Processes	GO:1990868	response to chemokine	-5.01195	-3.01505	1235,2919,2921,3579,3627,4283,6352,6355,6373,6387,7852,9034,57007	CCR6,CXCL1,CXCL3,CXCR2,CXCL10,CXCL9,CCL5,CCL8,CXCL11,CXCL12,CXCR4,CCRL2,ACKR3	13/92
10_Member	GO Biological Processes	GO:1990869	cellular response to chemokine	-5.01195	-3.01505	1235,2919,2921,3579,3627,4283,6352,6355,6373,6387,7852,9034,57007	CCR6,CXCL1,CXCL3,CXCR2,CXCL10,CXCL9,CCL5,CCL8,CXCL11,CXCL12,CXCR4,CCRL2,ACKR3	13/92
10_Member	GO Biological Processes	GO:0030593	neutrophil chemotaxis	-4.88595	-2.89898	2919,2921,3579,3627,3672,3958,4283,6352,6355,6373,7042,10451	CXCL1,CXCL3,CXCR2,CXCL10,ITGA1,LGALS3,CXCL9,CCL5,CCL8,CXCL11,TGFB2,VAV3	12/81
10_Member	Reactome Gene Sets	R-HSA-372790	Signaling by GPCR	-4.62964	-2.69636	301,747,799,1235,1393,1894,1901,1910,2015,2335,2359,2550,2791,2911,2919,2921,3269,3579,3627,3838,4283,5031,5443,5567,5577,5734,6344,6352,6373,6387,7852,7855,8477,9034,9294,10451,11343,23596,27115,27237,55970,57007,57406,57486,84033	ANXA1,DAGLA,CALCR,CCR6,CRHBP,ECT2,S1PR1,EDNRB,ADGRE1,FN1,FPR3,GABBR1,GNG11,GRM1,CXCL1,CXCL3,HRH1,CXCR2,CXCL10,KPNA2,CXCL9,P2RY6,POMC,PRKACB,PRKAR2B,PTGER4,SCTR,CCL5,CXCL11,CXCL12,CXCR4,FZD5,GPR65,CCRL2,S1PR2,VAV3,MGLL,OPN3,PDE7B,ARHGEF16,GNG12,ACKR3,ABHD6,NLN,OBSCN	45/709
10_Member	Reactome Gene Sets	R-HSA-500792	GPCR ligand binding	-4.41575	-2.52673	301,799,1235,1393,1901,1910,2015,2359,2550,2791,2911,2919,2921,3269,3579,3627,4283,5031,5443,5734,6344,6352,6373,6387,7852,7855,8477,9034,9294,23596,55970,57007,57486	ANXA1,CALCR,CCR6,CRHBP,S1PR1,EDNRB,ADGRE1,FPR3,GABBR1,GNG11,GRM1,CXCL1,CXCL3,HRH1,CXCR2,CXCL10,CXCL9,P2RY6,POMC,PTGER4,SCTR,CCL5,CXCL11,CXCL12,CXCR4,FZD5,GPR65,CCRL2,S1PR2,OPN3,GNG12,ACKR3,NLN	33/468
10_Member	Reactome Gene Sets	R-HSA-388396	GPCR downstream signalling	-3.81245	-2.06084	301,747,799,1235,1894,1910,2335,2359,2550,2791,2911,2919,2921,3269,3579,3627,3838,4283,5031,5443,5567,5577,5734,6344,6352,6373,6387,7852,8477,9294,10451,11343,23596,27115,27237,55970,57007,57406,84033	ANXA1,DAGLA,CALCR,CCR6,ECT2,EDNRB,FN1,FPR3,GABBR1,GNG11,GRM1,CXCL1,CXCL3,HRH1,CXCR2,CXCL10,KPNA2,CXCL9,P2RY6,POMC,PRKACB,PRKAR2B,PTGER4,SCTR,CCL5,CXCL11,CXCL12,CXCR4,GPR65,S1PR2,VAV3,MGLL,OPN3,PDE7B,ARHGEF16,GNG12,ACKR3,ABHD6,OBSCN	39/634
10_Member	Canonical Pathways	M5883	NABA SECRETED FACTORS	-3.71303	-1.98826	1393,2919,2921,3082,3574,3586,3600,3627,4192,4254,4283,6275,6277,6281,6352,6355,6373,6387,6424,7042,7062,8743,9966,10673,388697	CRHBP,CXCL1,CXCL3,HGF,IL7,IL10,IL15,CXCL10,MDK,KITLG,CXCL9,S100A4,S100A6,S100A10,CCL5,CCL8,CXCL11,CXCL12,SFRP4,TGFB2,TCHH,TNFSF10,TNFSF15,TNFSF13B,HRNR	25/343
10_Member	KEGG Pathway	hsa04062	Chemokine signaling pathway	-3.6648	-1.95639	1235,2791,2919,2921,3579,3627,4283,5567,6352,6355,6373,6387,6772,7852,10451,55970,653361	CCR6,GNG11,CXCL1,CXCL3,CXCR2,CXCL10,CXCL9,PRKACB,CCL5,CCL8,CXCL11,CXCL12,STAT1,CXCR4,VAV3,GNG12,NCF1	17/192
10_Member	Reactome Gene Sets	R-HSA-373076	Class A/1 (Rhodopsin-like receptors)	-3.49848	-1.83078	301,1235,1901,1910,2359,2919,2921,3269,3579,3627,4283,5031,5443,5734,6352,6373,6387,7852,8477,9034,9294,23596,57007,57486	ANXA1,CCR6,S1PR1,EDNRB,FPR3,CXCL1,CXCL3,HRH1,CXCR2,CXCL10,CXCL9,P2RY6,POMC,PTGER4,CCL5,CXCL11,CXCL12,CXCR4,GPR65,CCRL2,S1PR2,OPN3,ACKR3,NLN	24/334
10_Member	Reactome Gene Sets	R-HSA-375276	Peptide ligand-binding receptors	-3.43089	-1.78639	301,1235,1910,2359,2919,2921,3579,3627,4283,5443,6352,6373,6387,7852,9034,57007,57486	ANXA1,CCR6,EDNRB,FPR3,CXCL1,CXCL3,CXCR2,CXCL10,CXCL9,POMC,CCL5,CXCL11,CXCL12,CXCR4,CCRL2,ACKR3,NLN	17/201
10_Member	WikiPathways	WP3929	Chemokine signaling pathway	-3.39707	-1.76397	1235,2791,2921,3579,3627,4283,5567,6352,6373,6387,6772,7852,10451,55970,653361	CCR6,GNG11,CXCL3,CXCR2,CXCL10,CXCL9,PRKACB,CCL5,CXCL11,CXCL12,STAT1,CXCR4,VAV3,GNG12,NCF1	15/166
10_Member	Reactome Gene Sets	R-HSA-418594	G alpha (i) signalling events	-3.03978	-1.50037	301,1235,2359,2550,2791,2919,2921,3579,3627,3838,4283,5443,5567,5577,6352,6373,6387,7852,9294,23596,55970,57007	ANXA1,CCR6,FPR3,GABBR1,GNG11,CXCL1,CXCL3,CXCR2,CXCL10,KPNA2,CXCL9,POMC,PRKACB,PRKAR2B,CCL5,CXCL11,CXCL12,CXCR4,S1PR2,OPN3,GNG12,ACKR3	22/318
10_Member	WikiPathways	WP5095	Overview of proinflammatory and profibrotic mediators	-2.94076	-1.42834	2919,2921,3574,3586,3600,3627,4283,6352,6355,6373,6387,10673	CXCL1,CXCL3,IL7,IL10,IL15,CXCL10,CXCL9,CCL5,CCL8,CXCL11,CXCL12,TNFSF13B	12/129
11_Member	GO Biological Processes	GO:0006954	inflammatory response	-11.0782	-8.44088	301,558,923,929,960,961,968,1235,1393,1536,2212,2335,2359,2529,2896,2919,2921,3269,3460,3559,3579,3586,3620,3627,4069,4086,4192,4210,4283,5734,6352,6355,6373,6614,7852,8876,9034,9051,9258,9332,9435,9447,9830,10225,11343,26471,50848,56833,80833,115362,144811,153090,353376	ANXA1,AXL,CD6,CD14,CD44,CD47,CD68,CCR6,CRHBP,CYBB,FCGR2A,FN1,FPR3,FUT7,GRN,CXCL1,CXCL3,HRH1,IFNGR2,IL2RA,CXCR2,IL10,IDO1,CXCL10,LYZ,SMAD1,MDK,MEFV,CXCL9,PTGER4,CCL5,CCL8,CXCL11,SIGLEC1,CXCR4,VNN1,CCRL2,PSTPIP1,MFHAS1,CD163,CHST2,AIM2,TRIM14,CD96,MGLL,NUPR1,F11R,SLAMF8,APOL3,GBP5,LACC1,DAB2IP,TICAM2	53/563
12_Member	GO Biological Processes	GO:0051336	regulation of hydrolase activity	-10.5438	-7.93929	330,444,710,831,834,945,960,1509,1512,1514,1612,1894,2099,2146,2896,3672,3958,4155,4210,4939,5031,5361,5641,5698,5900,5923,6091,6251,6281,6300,6352,6355,7294,8477,8743,9447,9705,9910,9966,10062,10154,10451,22914,23151,23348,23677,25780,26037,27074,27237,51429,55785,55803,55843,85440,91662,92154,114769,116986,152273,153020,153090	BIRC3,ASPH,SERPING1,CAST,CASP1,CD33,CD44,CTSD,CTSH,CTSL,DAPK1,ECT2,ESR1,EZH2,GRN,ITGA1,LGALS3,MBP,MEFV,OAS2,P2RY6,PLXNA1,LGMN,PSMB9,RALGDS,RASGRF1,ROBO1,RSU1,S100A10,MAPK12,CCL5,CCL8,TXK,GPR65,TNFSF10,AIM2,ST18,RABGAP1L,TNFSF15,NR1H3,PLXNC1,VAV3,KLRK1,GRAMD4,DOCK9,SH3BP4,RASGRP3,SIPA1L1,LAMP3,ARHGEF16,SNX9,FGD6,ADAP2,ARHGAP15,DOCK7,NLRP12,MTSS2,CARD16,AGAP2,FGD5,RASGEF1B,DAB2IP	62/746
12_Member	GO Biological Processes	GO:0051345	positive regulation of hydrolase activity	-7.91857	-5.59897	444,834,945,1509,1512,1514,1612,1894,2099,2146,2896,3672,4155,4210,5031,5641,5900,5923,6091,6251,6281,6300,6352,6355,7294,8477,8743,9447,9705,9966,10062,23151,23348,25780,26037,27237,51429,85440,91662,92154,116986,153020	ASPH,CASP1,CD33,CTSD,CTSH,CTSL,DAPK1,ECT2,ESR1,EZH2,GRN,ITGA1,MBP,MEFV,P2RY6,LGMN,RALGDS,RASGRF1,ROBO1,RSU1,S100A10,MAPK12,CCL5,CCL8,TXK,GPR65,TNFSF10,AIM2,ST18,TNFSF15,NR1H3,GRAMD4,DOCK9,RASGRP3,SIPA1L1,ARHGEF16,SNX9,DOCK7,NLRP12,MTSS2,AGAP2,RASGEF1B	42/482
12_Member	GO Biological Processes	GO:0043087	regulation of GTPase activity	-6.65462	-4.44005	1894,2146,5361,5900,5923,6251,6281,6352,6355,8477,9910,10154,10451,22914,23348,23677,25780,26037,27237,51429,55785,55803,55843,85440,92154,116986,152273,153020,153090	ECT2,EZH2,PLXNA1,RALGDS,RASGRF1,RSU1,S100A10,CCL5,CCL8,GPR65,RABGAP1L,PLXNC1,VAV3,KLRK1,DOCK9,SH3BP4,RASGRP3,SIPA1L1,ARHGEF16,SNX9,FGD6,ADAP2,ARHGAP15,DOCK7,MTSS2,AGAP2,FGD5,RASGEF1B,DAB2IP	29/298
12_Member	GO Biological Processes	GO:0043547	positive regulation of GTPase activity	-3.19342	-1.60758	1894,2146,5900,5923,6251,6281,6352,6355,8477,23348,25780,26037,27237,51429,85440,92154,116986,153020	ECT2,EZH2,RALGDS,RASGRF1,RSU1,S100A10,CCL5,CCL8,GPR65,DOCK9,RASGRP3,SIPA1L1,ARHGEF16,SNX9,DOCK7,MTSS2,AGAP2,RASGEF1B	18/230
13_Member	Reactome Gene Sets	R-HSA-6798695	Neutrophil degranulation	-10.4729	-7.87623	302,929,945,960,961,968,1509,1512,1536,2212,2219,2495,2512,2799,2896,2919,3074,3101,3417,3579,3958,4069,5175,5236,5328,5912,6402,8514,8655,8826,8876,8987,10288,10493,10533,10577,10788,10875,22918,25798,26578,51316,51382,55313,203068,353376,388697	ANXA2,CD14,CD33,CD44,CD47,CD68,CTSD,CTSH,CYBB,FCGR2A,FCN1,FTH1,FTL,GNS,GRN,CXCL1,HEXB,HK3,IDH1,CXCR2,LGALS3,LYZ,PECAM1,PGM1,PLAU,RAP2B,SELL,KCNAB2,DYNLL1,IQGAP1,VNN1,STBD1,LILRB2,VAT1,ATG7,NPC2,IQGAP2,FGL2,CD93,BRI3,OSTF1,PLAC8,ATP6V1D,CPPED1,TUBB,TICAM2,HRNR	47/480
14_Member	GO Biological Processes	GO:0050792	regulation of viral process	-10.2704	-7.68889	104,558,596,940,972,2219,3434,3669,3838,3956,4939,6352,6733,6772,7153,7852,9582,9830,27074,29969,30835,64135,85363,117854,140564,286827	ADARB1,AXL,BCL2,CD28,CD74,FCN1,IFIT1,ISG20,KPNA2,LGALS1,OAS2,CCL5,SRPK2,STAT1,TOP2A,CXCR4,APOBEC3B,TRIM14,LAMP3,MDFIC,CD209,IFIH1,TRIM5,TRIM6,APOBEC3D,TRIM59	26/168
14_Member	GO Biological Processes	GO:1903900	regulation of viral life cycle	-8.74433	-6.31999	104,558,596,940,972,2219,3434,3669,3838,3956,4939,6352,6733,7153,9582,27074,30835,64135,85363,117854,140564,286827	ADARB1,AXL,BCL2,CD28,CD74,FCN1,IFIT1,ISG20,KPNA2,LGALS1,OAS2,CCL5,SRPK2,TOP2A,APOBEC3B,LAMP3,CD209,IFIH1,TRIM5,TRIM6,APOBEC3D,TRIM59	22/143
14_Member	GO Biological Processes	GO:0048524	positive regulation of viral process	-5.99684	-3.85333	104,558,940,972,3434,3838,3956,6352,6733,7153,29969,30835	ADARB1,AXL,CD28,CD74,IFIT1,KPNA2,LGALS1,CCL5,SRPK2,TOP2A,MDFIC,CD209	12/64
14_Member	GO Biological Processes	GO:0048525	negative regulation of viral process	-5.68388	-3.58449	2219,3434,3669,4939,6352,6733,6772,9582,9830,64135,85363,117854,140564,286827	FCN1,IFIT1,ISG20,OAS2,CCL5,SRPK2,STAT1,APOBEC3B,TRIM14,IFIH1,TRIM5,TRIM6,APOBEC3D,TRIM59	14/93
14_Member	GO Biological Processes	GO:0045069	regulation of viral genome replication	-5.40038	-3.33194	104,596,940,3434,3669,4939,6352,6733,7153,9582,64135,117854,140564	ADARB1,BCL2,CD28,IFIT1,ISG20,OAS2,CCL5,SRPK2,TOP2A,APOBEC3B,IFIH1,TRIM6,APOBEC3D	13/85
14_Member	GO Biological Processes	GO:0045071	negative regulation of viral genome replication	-4.15292	-2.3199	3434,3669,4939,6352,6733,9582,64135,117854,140564	IFIT1,ISG20,OAS2,CCL5,SRPK2,APOBEC3B,IFIH1,TRIM6,APOBEC3D	9/55
14_Member	GO Biological Processes	GO:0045070	positive regulation of viral genome replication	-3.34587	-1.72092	104,940,3434,6352,6733,7153	ADARB1,CD28,IFIT1,CCL5,SRPK2,TOP2A	6/31
15_Member	Reactome Gene Sets	R-HSA-9716542	Signaling by Rho GTPases, Miro GTPases and RHOBTB3	-10.2194	-7.64538	87,120,394,699,991,1058,1062,1063,1536,1793,1894,4689,4810,5361,5910,7431,7456,7533,8364,8476,8655,8826,8987,9055,9367,9590,9644,9901,10409,10451,10505,10602,10788,23048,23348,27237,55143,55843,55852,57082,57584,64105,79658,80005,81839,81930,84033,85415,85440,90627,93663,94240,114822,144402,151246,152273,220134,347902,445582,653361	ACTN1,ADD3,ARHGAP5,BUB1,CDC20,CENPA,CENPE,CENPF,CYBB,DOCK1,ECT2,NCF4,NHS,PLXNA1,RAP1GDS1,VIM,WIPF1,YWHAH,H4C3,CDC42BPA,DYNLL1,IQGAP1,STBD1,PRC1,RAB9A,AKAP12,SH3PXD2A,SRGAP3,BASP1,VAV3,SEMA4F,CDC42EP3,IQGAP2,FNBP1,DOCK9,ARHGEF16,CDCA8,ARHGAP15,TEX2,KNL1,ARHGAP21,CENPK,ARHGAP10,DOCK5,VANGL1,KIF18A,OBSCN,RHPN2,DOCK7,STARD13,ARHGAP18,EPSTI1,RHPN1,CPNE8,SGO2,FGD5,SKA1,AMIGO2,POTEE,NCF1	60/722
15_Member	Reactome Gene Sets	R-HSA-194315	Signaling by Rho GTPases	-9.70499	-7.18047	87,120,394,699,991,1058,1062,1063,1536,1793,1894,4689,4810,5361,7431,7456,7533,8364,8476,8655,8826,8987,9055,9590,9644,9901,10409,10451,10505,10602,10788,23048,23348,27237,55143,55843,55852,57082,57584,64105,79658,80005,81839,81930,84033,85415,85440,90627,93663,94240,114822,144402,151246,152273,220134,347902,445582,653361	ACTN1,ADD3,ARHGAP5,BUB1,CDC20,CENPA,CENPE,CENPF,CYBB,DOCK1,ECT2,NCF4,NHS,PLXNA1,VIM,WIPF1,YWHAH,H4C3,CDC42BPA,DYNLL1,IQGAP1,STBD1,PRC1,AKAP12,SH3PXD2A,SRGAP3,BASP1,VAV3,SEMA4F,CDC42EP3,IQGAP2,FNBP1,DOCK9,ARHGEF16,CDCA8,ARHGAP15,TEX2,KNL1,ARHGAP21,CENPK,ARHGAP10,DOCK5,VANGL1,KIF18A,OBSCN,RHPN2,DOCK7,STARD13,ARHGAP18,EPSTI1,RHPN1,CPNE8,SGO2,FGD5,SKA1,AMIGO2,POTEE,NCF1	58/706
15_Member	Reactome Gene Sets	R-HSA-9012999	RHO GTPase cycle	-9.33376	-6.85218	87,120,394,1536,1793,1894,4689,4810,5361,7431,7456,8476,8826,8987,9590,9644,9901,10409,10451,10505,10602,10788,23048,23348,27237,55843,55852,57584,79658,80005,81839,84033,85415,85440,90627,93663,94240,114822,144402,152273,347902,445582,653361	ACTN1,ADD3,ARHGAP5,CYBB,DOCK1,ECT2,NCF4,NHS,PLXNA1,VIM,WIPF1,CDC42BPA,IQGAP1,STBD1,AKAP12,SH3PXD2A,SRGAP3,BASP1,VAV3,SEMA4F,CDC42EP3,IQGAP2,FNBP1,DOCK9,ARHGEF16,ARHGAP15,TEX2,ARHGAP21,ARHGAP10,DOCK5,VANGL1,OBSCN,RHPN2,DOCK7,STARD13,ARHGAP18,EPSTI1,RHPN1,CPNE8,FGD5,AMIGO2,POTEE,NCF1	43/449
15_Member	Reactome Gene Sets	R-HSA-9013149	RAC1 GTPase cycle	-6.67527	-4.45748	394,1536,1793,1894,4689,4810,7456,8476,8826,9901,10451,10788,23348,55843,57584,79658,80005,81839,85440,152273,347902,653361	ARHGAP5,CYBB,DOCK1,ECT2,NCF4,NHS,WIPF1,CDC42BPA,IQGAP1,SRGAP3,VAV3,IQGAP2,DOCK9,ARHGAP15,ARHGAP21,ARHGAP10,DOCK5,VANGL1,DOCK7,FGD5,AMIGO2,NCF1	22/185
15_Member	Reactome Gene Sets	R-HSA-9013148	CDC42 GTPase cycle	-6.05599	-3.90142	394,1894,7456,8476,8826,9644,9901,10451,10602,10788,23048,23348,27237,57584,79658,81839,85440,90627,144402	ARHGAP5,ECT2,WIPF1,CDC42BPA,IQGAP1,SH3PXD2A,SRGAP3,VAV3,CDC42EP3,IQGAP2,FNBP1,DOCK9,ARHGEF16,ARHGAP21,ARHGAP10,VANGL1,DOCK7,STARD13,CPNE8	19/155
15_Member	Reactome Gene Sets	R-HSA-9035034	RHOF GTPase cycle	-4.23874	-2.3866	87,120,394,9590,10409,57584,81839,445582	ACTN1,ADD3,ARHGAP5,AKAP12,BASP1,ARHGAP21,VANGL1,POTEE	8/42
15_Member	Reactome Gene Sets	R-HSA-9013405	RHOD GTPase cycle	-4.21778	-2.37531	87,120,394,5361,8987,9590,57584,81839,144402	ACTN1,ADD3,ARHGAP5,PLXNA1,STBD1,AKAP12,ARHGAP21,VANGL1,CPNE8	9/54
15_Member	Reactome Gene Sets	R-HSA-9013406	RHOQ GTPase cycle	-3.90798	-2.1373	394,8476,8826,10602,23048,57584,81839,84033,144402	ARHGAP5,CDC42BPA,IQGAP1,CDC42EP3,FNBP1,ARHGAP21,VANGL1,OBSCN,CPNE8	9/59
15_Member	Reactome Gene Sets	R-HSA-8980692	RHOA GTPase cycle	-3.44002	-1.79408	394,1894,8826,8987,10451,55852,57584,79658,81839,84033,85415,90627,93663,114822	ARHGAP5,ECT2,IQGAP1,STBD1,VAV3,TEX2,ARHGAP21,ARHGAP10,VANGL1,OBSCN,RHPN2,STARD13,ARHGAP18,RHPN1	14/147
15_Member	Reactome Gene Sets	R-HSA-9013404	RAC2 GTPase cycle	-3.20561	-1.61352	1536,1793,4689,4810,8826,8987,10451,57584,81839,653361	CYBB,DOCK1,NCF4,NHS,IQGAP1,STBD1,VAV3,ARHGAP21,VANGL1,NCF1	10/88
15_Member	Reactome Gene Sets	R-HSA-9013408	RHOG GTPase cycle	-3.15392	-1.58281	394,1793,8987,10451,10788,27237,57584,80005,81839	ARHGAP5,DOCK1,STBD1,VAV3,IQGAP2,ARHGEF16,ARHGAP21,DOCK5,VANGL1	9/74
15_Member	Reactome Gene Sets	R-HSA-9013423	RAC3 GTPase cycle	-2.98038	-1.45672	394,1536,4689,4810,8987,55843,57584,81839,347902,653361	ARHGAP5,CYBB,NCF4,NHS,STBD1,ARHGAP15,ARHGAP21,VANGL1,AMIGO2,NCF1	10/94
15_Member	Reactome Gene Sets	R-HSA-9013409	RHOJ GTPase cycle	-2.03968	-0.771048	394,8476,23048,57584,81839,144402	ARHGAP5,CDC42BPA,FNBP1,ARHGAP21,VANGL1,CPNE8	6/55
16_Member	KEGG Pathway	hsa04380	Osteoclast differentiation	-10.0226	-7.46304	54,799,2212,3454,3455,3460,4286,4689,5603,6300,6772,7006,7042,8651,8792,10288,10379,10859,10990,11024,11027,353514,653361	ACP5,CALCR,FCGR2A,IFNAR1,IFNAR2,IFNGR2,MITF,NCF4,MAPK13,MAPK12,STAT1,TEC,TGFB2,SOCS1,TNFRSF11A,LILRB2,IRF9,LILRB1,LILRB5,LILRA1,LILRA2,LILRA5,NCF1	23/135
16_Member	KEGG Pathway	hsa04662	B cell receptor signaling pathway	-2.19577	-0.881064	10288,10451,10859,10990,11024,11027,25780,353514	LILRB2,VAV3,LILRB1,LILRB5,LILRA1,LILRA2,RASGRP3,LILRA5	8/84
17_Member	KEGG Pathway	hsa04621	NOD-like receptor signaling pathway	-9.98475	-7.43919	330,596,834,1536,2633,2634,2635,2919,2921,3454,3455,4210,4939,5603,6300,6352,6772,9051,9447,10379,84674,90550,91662,114769,115361,115362,118429	BIRC3,BCL2,CASP1,CYBB,GBP1,GBP2,GBP3,CXCL1,CXCL3,IFNAR1,IFNAR2,MEFV,OAS2,MAPK13,MAPK12,CCL5,STAT1,PSTPIP1,AIM2,IRF9,CARD6,MCU,NLRP12,CARD16,GBP4,GBP5,ANTXR2	27/186
17_Member	KEGG Pathway	hsa04217	Necroptosis	-3.59872	-1.90509	330,596,834,1536,2495,2512,3454,3455,3460,6772,8743,10379,55506,81030,353376	BIRC3,BCL2,CASP1,CYBB,FTH1,FTL,IFNAR1,IFNAR2,IFNGR2,STAT1,TNFSF10,IRF9,MACROH2A2,ZBP1,TICAM2	15/159
18_Member	Reactome Gene Sets	R-HSA-1280215	Cytokine Signaling in Immune system	-9.62204	-7.10965	301,302,330,596,834,941,960,1845,1848,1901,2162,2317,2335,2633,2634,2635,2919,3082,3429,3433,3434,3454,3455,3460,3559,3560,3574,3586,3600,3627,3662,3669,3838,4684,4904,4939,5443,5618,5698,6352,6772,6809,7006,7314,7431,8651,8764,8792,9246,9830,9966,10379,10673,23586,26095,51191,54739,85363,115361,115362,117854,317649	ANXA1,ANXA2,BIRC3,BCL2,CASP1,CD80,CD44,DUSP3,DUSP6,S1PR1,F13A1,FLNB,FN1,GBP1,GBP2,GBP3,CXCL1,HGF,IFI27,IFIT2,IFIT1,IFNAR1,IFNAR2,IFNGR2,IL2RA,IL2RB,IL7,IL10,IL15,CXCL10,IRF4,ISG20,KPNA2,NCAM1,YBX1,OAS2,POMC,PRLR,PSMB9,CCL5,STAT1,STX3,TEC,UBB,VIM,SOCS1,TNFRSF14,TNFRSF11A,UBE2L6,TRIM14,TNFSF15,IRF9,TNFSF13B,RIGI,PTPN20,HERC5,XAF1,TRIM5,GBP4,GBP5,TRIM6,EIF4E3	62/786
18_Member	Reactome Gene Sets	R-HSA-6785807	Interleukin-4 and Interleukin-13 signaling	-3.6414	-1.93896	301,596,1901,2162,2335,3082,3586,3662,5443,6772,7431,8651	ANXA1,BCL2,S1PR1,F13A1,FN1,HGF,IL10,IRF4,POMC,STAT1,VIM,SOCS1	12/108
18_Member	Reactome Gene Sets	R-HSA-449147	Signaling by Interleukins	-2.96733	-1.44544	301,302,596,834,941,1845,1848,1901,2162,2335,2919,3082,3559,3560,3574,3586,3600,3627,3662,5443,5698,6352,6772,6809,7006,7314,7431,8651,26095	ANXA1,ANXA2,BCL2,CASP1,CD80,DUSP3,DUSP6,S1PR1,F13A1,FN1,CXCL1,HGF,IL2RA,IL2RB,IL7,IL10,IL15,CXCL10,IRF4,POMC,PSMB9,CCL5,STAT1,STX3,TEC,UBB,VIM,SOCS1,PTPN20	29/473
19_Member	GO Biological Processes	GO:0050727	regulation of inflammatory response	-9.5487	-7.04264	54,196,301,330,747,834,940,961,1910,2099,2529,2629,2896,3082,3559,3586,3600,3620,3956,4192,4210,5603,5734,6352,8792,8870,9258,9447,10062,11221,11343,26471,51704,56833,64116,81030,91662,114769,131450,144811,353514,653361	ACP5,AHR,ANXA1,BIRC3,DAGLA,CASP1,CD28,CD47,EDNRB,ESR1,FUT7,GBA1,GRN,HGF,IL2RA,IL10,IL15,IDO1,LGALS1,MDK,MEFV,MAPK13,PTGER4,CCL5,TNFRSF11A,IER3,MFHAS1,AIM2,NR1H3,DUSP10,MGLL,NUPR1,GPRC5B,SLAMF8,SLC39A8,ZBP1,NLRP12,CARD16,CD200R1,LACC1,LILRA5,NCF1	42/425
19_Member	GO Biological Processes	GO:0050729	positive regulation of inflammatory response	-5.51251	-3.42768	834,940,961,2896,3600,3620,3956,4192,4210,5603,5734,8792,9447,26471,51704,81030,91662,353514	CASP1,CD28,CD47,GRN,IL15,IDO1,LGALS1,MDK,MEFV,MAPK13,PTGER4,TNFRSF11A,AIM2,NUPR1,GPRC5B,ZBP1,NLRP12,LILRA5	18/153
20_Member	Reactome Gene Sets	R-HSA-109582	Hemostasis	-9.02325	-6.57597	87,302,483,710,747,928,960,961,962,972,1062,1793,2162,2335,2791,2995,3082,3672,3676,3778,3832,3959,5175,5328,5567,5577,6281,6383,6385,6402,6414,7042,7450,8407,9046,9672,9749,10112,10451,10490,11343,23052,23348,50848,55970,56992,57406,66005,80005,81930,85440,135228	ACTN1,ANXA2,ATP1B3,SERPING1,DAGLA,CD9,CD44,CD47,CD48,CD74,CENPE,DOCK1,F13A1,FN1,GNG11,GYPC,HGF,ITGA1,ITGA4,KCNMA1,KIF11,LGALS3BP,PECAM1,PLAU,PRKACB,PRKAR2B,S100A10,SDC2,SDC4,SELL,SELENOP,TGFB2,VWF,TAGLN2,DOK2,SDC3,PHACTR2,KIF20A,VAV3,VTI1B,MGLL,ENDOD1,DOCK9,F11R,GNG12,KIF15,ABHD6,CHID1,DOCK5,KIF18A,DOCK7,CD109	52/622
20_Member	Reactome Gene Sets	R-HSA-114608	Platelet degranulation	-5.92636	-3.7963	87,710,928,2162,2335,3082,3959,5175,6414,7042,7450,8407,9749,10490,23052,66005,135228	ACTN1,SERPING1,CD9,F13A1,FN1,HGF,LGALS3BP,PECAM1,SELENOP,TGFB2,VWF,TAGLN2,PHACTR2,VTI1B,ENDOD1,CHID1,CD109	17/129
20_Member	Reactome Gene Sets	R-HSA-76005	Response to elevated platelet cytosolic Ca2+	-5.69356	-3.58671	87,710,928,2162,2335,3082,3959,5175,6414,7042,7450,8407,9749,10490,23052,66005,135228	ACTN1,SERPING1,CD9,F13A1,FN1,HGF,LGALS3BP,PECAM1,SELENOP,TGFB2,VWF,TAGLN2,PHACTR2,VTI1B,ENDOD1,CHID1,CD109	17/134
20_Member	Reactome Gene Sets	R-HSA-76002	Platelet activation, signaling and aggregation	-4.654	-2.71393	87,710,747,928,2162,2335,2791,3082,3959,5175,6414,7042,7450,8407,9749,10451,10490,11343,23052,55970,57406,66005,135228	ACTN1,SERPING1,DAGLA,CD9,F13A1,FN1,GNG11,HGF,LGALS3BP,PECAM1,SELENOP,TGFB2,VWF,TAGLN2,PHACTR2,VAV3,VTI1B,MGLL,ENDOD1,GNG12,ABHD6,CHID1,CD109	23/263

## Sheet: 1.4 Fig2f_metascape
Table 1.4	Fig2f_metascape
GroupID	Category	Term	Description	LogP	Log(q-value)	Genes	Symbols	InTerm_InList
1_Summary	GO Biological Processes	GO:0098609	cell-cell adhesion	-37.3326	-32.9877	460,947,1008,1296,1365,1740,1826,2267,4040,4041,4301,4756,4897,4973,6376,6464,6662,7048,7082,7414,8641,9708,9746,9752,10398,22859,22883,25945,26011,26025,26167,53834,54510,56097,56098,56099,56100,56101,56102,56103,56104,56105,56106,56107,56108,56109,56110,56111,56112,56113,56114,56126,56127,56131,56132,56133,56134,56135,56136,56137,56138,56139,56140,56141,56142,56143,56144,56145,56146,56147,57463…	ASTN1,CD34,CDH10,COL8A2,CLDN3,DLG2,DSCAM,FGL1,LRP6,LRP5,AFDN,NEO1,NRCAM,OLR1,CX3CL1,SHC1,SOX9,TGFBR2,TJP1,VCL,PCDHGB4,PCDHGA8,CLSTN3,PCDHA9,MYL9,ADGRL1,CLSTN1,NECTIN3,TENM4,PCDHGA12,PCDHB5,FGFRL1,PCDH18,PCDHGC5,PCDHGC4,PCDHGB7,PCDHGB6,PCDHGB5,PCDHGB3,PCDHGB2,PCDHGB1,PCDHGA11,PCDHGA10,PCDHGA9,PCDHGA7,PCDHGA6,PCDHGA5,PCDHGA4,PCDHGA3,PCDHGA2,PCDHGA1,PCDHB10,PCDHB9,PCDHB4,PCDHB3,PCDHB2,PCDHAC2,PCDHAC…	79/542
2_Summary	GO Biological Processes	GO:0001944	vasculature development	-13.7573	-10.0144	388,947,1296,1490,1906,1948,1958,1960,2308,3164,3949,4041,4066,4193,4211,4327,4824,4855,4882,4897,5140,5311,5532,5629,5747,5784,5787,6376,6443,6464,6659,6886,7010,7048,7410,8434,9289,9353,9693,10163,10267,10630,11174,23411,23414,23509,25960,28514,30008,51162,56999,79893,81031,83700,154796,154810,1436,2626,4088,5727,6497,6662,10252,10395,27443,51339,55036,84913	RHOB,CD34,COL8A2,CCN2,EDN1,EFNB2,EGR1,EGR3,FOXO1,NR4A1,LDLR,LRP5,LYL1,MDM2,MEIS1,MMP19,NKX3-1,NOTCH4,NPR2,NRCAM,PDE3B,PKD2,PPP3CB,PROX1,PTK2,PTPN14,PTPRB,CX3CL1,SGCB,SHC1,SOX4,TAL1,TEK,TGFBR2,VAV2,RECK,ADGRG1,SLIT2,RAPGEF2,WASF2,RAMP1,PDPN,ADAMTS6,SIRT1,ZFPM2,POFUT1,ADGRA2,DLL1,EFEMP2,EGFL7,ADAMTS9,GGNBP2,SLC2A10,JAM3,AMOT,AMOTL1,CSF1R,GATA4,SMAD3,PTCH1,SKI,SOX9,SPRY1,DLC1,CECR2,DACT1,CCDC40,ATOH8	68/-
3_Summary	GO Biological Processes	GO:0034330	cell junction organization	-11.461	-7.89422	88,1008,1365,1436,1826,1948,2149,2556,2561,3480,4088,4204,4301,4897,5217,6272,6376,6622,7082,7414,8394,8777,9253,9456,9722,9746,10163,10395,10810,23181,23380,26167,27445,56097,56098,56126,56127,56131,56132,56133,66000,79147,79778,83660,83700,84623,84966,85461,92737,116442,221935,320,321,1740,1960,2901,2982,3164,4040,4882,5327,6195,6196,6560,6844,7915,9751,9783,66004,116372,8641,64072	ACTN2,CDH10,CLDN3,CSF1R,DSCAM,EFNB2,F2R,GABRA3,GABRB2,IGF1R,SMAD3,MECP2,AFDN,NRCAM,PFN2,SORT1,CX3CL1,SNCA,TJP1,VCL,PIP5K1A,MPDZ,NUMBL,HOMER1,NOS1AP,CLSTN3,WASF2,DLC1,WASF3,DIP2A,SRGAP2,PCDHB5,PCLO,PCDHGC5,PCDHGC4,PCDHB10,PCDHB9,PCDHB4,PCDHB3,PCDHB2,TMEM108,FKRP,MICALL2,TLN2,JAM3,KIRREL3,IGSF21,TANC1,DNER,RAB39B,SDK1,APBA1,APBA2,DLG2,EGR3,GRIK5,GUCY1A1,NR4A1,LRP6,NPR2,PLAT,RPS6KA1,RPS6KA2,SLC12A4,…	72/-
4_Summary	GO Biological Processes	GO:0016310	phosphorylation	-9.89608	-6.50542	208,695,816,1021,1025,1119,1152,1263,1436,1453,1455,1606,2011,2580,3480,3486,3656,3707,4145,4342,5166,5532,5568,5601,5602,5747,5894,6195,6196,7010,7048,7525,8394,8395,8396,8621,9263,9448,10000,10922,11213,11284,22845,23031,23043,23683,25989,51422,57538,65267,79705,79707,80271,83694,83983,91461,140901,166614,1801,2590,4193,8460,9397,10401,23411,26054,51126,51304,54795,55471	AKT2,BTK,CAMK2B,CDK6,CDK9,CHKA,CKB,PLK3,CSF1R,CSNK1D,CSNK1G2,DGKA,MARK2,GAK,IGF1R,IGFBP3,IRAK2,ITPKB,MATK,MOS,PDK4,PPP3CB,PRKACG,MAPK9,MAPK10,PTK2,RAF1,RPS6KA1,RPS6KA2,TEK,TGFBR2,YES1,PIP5K1A,PIP5K1B,PIP4K2B,CDK13,STK17A,MAP4K4,AKT3,FASTK,IRAK3,PNKP,DOLK,MAST3,TNIK,PRKD3,ULK3,PRKAG2,ALPK3,WNK3,LRRK1,NOL9,ITPKC,RPS6KL1,TSSK6,PKDCC,STK35,DCLK2,DPH1,GALNT2,MDM2,TPST1,NMT2,PIAS3,SIRT1,SENP6,NAA20,ZDH…	70/-
5_Summary	GO Biological Processes	GO:0051056	regulation of small GTPase mediated signal transduction	-9.60434	-6.25944	29,1795,2149,2245,3707,5894,6494,7010,7074,7410,9265,9266,9289,9353,9448,9639,9743,10252,10276,10395,22821,23108,23229,23263,23380,25894,25959,50861,57480,57568,79574,85360,154796,221472,388,695,2788,6915,389337,1152,2319,2889,4646,5783,6242,7919,8440,9217,10163,10652,10787,10810,10970,23141,29062,57572,5335,8412,5217,5747,10398,7375,9099	ABR,DOCK3,F2R,FGD1,ITPKB,RAF1,SIPA1,TEK,TIAM1,VAV2,CYTH3,CYTH2,ADGRG1,SLIT2,MAP4K4,ARHGEF10,ARHGAP32,SPRY1,NET1,DLC1,RASA3,RAP1GAP2,ARHGEF9,MCF2L,SRGAP2,PLEKHG4,KANK2,STMN3,PLEKHG1,SIPA1L2,EPS8L3,SYDE1,AMOT,FGD2,RHOB,BTK,GNG7,TBXA2R,ARHGEF37,CKB,FLOT2,RAPGEF1,MYO6,PTPN13,RTKN,DDX39B,NCK2,VAPB,WASF2,YKT6,NCKAP1,WASF3,CKAP4,ANKLE2,WDR91,DOCK6,PLCG1,BCAR3,PFN2,PTK2,MYL9,USP4,USP2	63/-
6_Summary	GO Biological Processes	GO:0007167	enzyme-linked receptor protein signaling pathway	-8.33778	-5.10682	154,208,1436,1490,1795,1796,1948,1958,2067,2308,2788,2889,3480,3624,4088,4882,5166,5327,5335,5747,5793,5894,6272,6464,6497,6662,6777,7010,7048,7074,7410,7525,8412,8440,8660,9019,9372,9392,9564,9693,10220,10849,23411,53358,53834,57154,60436,64651,84913,88,599,1906,3164,3663,4040,4041,4193,5140,5176,6443,6844,10365,10768,23641,2561,2946,4204,5311,6470,9353,54795,57463,729438,116372,1453,1960,9775,5…	ADRB2,AKT2,CSF1R,CCN2,DOCK3,DOK1,EFNB2,EGR1,ERCC1,FOXO1,GNG7,RAPGEF1,IGF1R,INHBA,SMAD3,NPR2,PDK4,PLAT,PLCG1,PTK2,PTPRG,RAF1,SORT1,SHC1,SKI,SOX9,STAT5B,TEK,TGFBR2,TIAM1,VAV2,YES1,BCAR3,NCK2,IRS2,MPZL1,ZFYVE9,TGFBRAP1,BCAR1,RAPGEF2,GDF11,POLR1G,SIRT1,SHC3,FGFRL1,SMURF1,TGIF2,CSRNP1,ATOH8,ACTN2,BCL2L2,EDN1,NR4A1,IRF5,LRP6,LRP5,MDM2,PDE3B,SERPINF1,SGCB,VAMP2,KLF2,AHCYL1,LDOC1,GABRB2,GSTM2,MECP2,PKD2,…	91/-
7_Summary	WikiPathways	WP5434	Pathways in cancer	-8.10822	-4.92193	208,816,861,894,1021,1026,1029,1436,1906,2057,2149,2308,2788,2941,2946,2947,2948,3459,3480,3570,3597,4040,4041,4088,4193,4824,4855,5335,5568,5601,5602,5727,5747,5894,6777,7048,7188,9618,10000,10023,10235,27436,28514,1008,1490,5176,6195,6464,7010,8314,8726,9448,23043,51422,114548,147111,154796,171023,389421	AKT2,CAMK2B,RUNX1,CCND2,CDK6,CDKN1A,CDKN2A,CSF1R,EDN1,EPOR,F2R,FOXO1,GNG7,GSTA4,GSTM2,GSTM3,GSTM4,IFNGR1,IGF1R,IL6R,IL13RA1,LRP6,LRP5,SMAD3,MDM2,NKX3-1,NOTCH4,PLCG1,PRKACG,MAPK9,MAPK10,PTCH1,PTK2,RAF1,STAT5B,TGFBR2,TRAF5,TRAF4,AKT3,FRAT1,RASGRP2,EML4,DLL1,CDH10,CCN2,SERPINF1,RPS6KA1,SHC1,TEK,BAP1,EED,MAP4K4,TNIK,PRKAG2,NLRP3,NOTUM,AMOT,ASXL1,LIN28B	59/-
8_Summary	GO Biological Processes	GO:0007507	heart development	-8.01298	-4.90311	88,1026,1906,2057,2626,3480,3624,4088,4193,4204,4211,4824,5311,5532,5629,5727,5747,6196,6443,6464,6497,6659,6662,7010,7048,7168,9353,10252,10395,11117,11155,11174,23135,23363,23414,23509,26011,28514,53834,55036,56999,57538,79147,80114,171023,203286,947,1948,1958,5176,10220,23371,25959,84623,326,388,1436,4041,4855,6886,7414,10630,23275,27152,27245,27443,30008,320,321,4040,5335,5362,8314,9775,10365…	ACTN2,CDKN1A,EDN1,EPOR,GATA4,IGF1R,INHBA,SMAD3,MDM2,MECP2,MEIS1,NKX3-1,PKD2,PPP3CB,PROX1,PTCH1,PTK2,RPS6KA2,SGCB,SHC1,SKI,SOX4,SOX9,TEK,TGFBR2,TPM1,SLIT2,SPRY1,DLC1,EMILIN1,LDB3,ADAMTS6,KDM6B,OBSL1,ZFPM2,POFUT1,TENM4,DLL1,FGFRL1,CCDC40,ADAMTS9,ALPK3,FKRP,BICC1,ASXL1,ANKS6,CD34,EFNB2,EGR1,SERPINF1,GDF11,TNS2,KANK2,KIRREL3,AIRE,RHOB,CSF1R,LRP5,NOTCH4,TAL1,VCL,PDPN,POFUT2,INTU,AHDC1,CECR2,EFEMP2,APB…	91/-
9_Summary	GO Biological Processes	GO:0072659	protein localization to plasma membrane	-7.99275	-4.90311	88,208,2319,2580,4040,4301,5727,6653,6844,8394,9545,9693,10098,10267,23043,23241,25945,51304,54997,57154,57799,65267,81619,116372,353116,9179,22883,1740,5830,7074,9777,23787,79720,738,79778	ACTN2,AKT2,FLOT2,GAK,LRP6,AFDN,PTCH1,SORL1,VAMP2,PIP5K1A,RAB3D,RAPGEF2,TSPAN5,RAMP1,TNIK,PACS2,NECTIN3,ZDHHC3,TESC,SMURF1,RAB40C,WNK3,TSPAN14,LYPD1,RILPL1,AP4M1,CLSTN1,DLG2,PEX5,TIAM1,TM9SF4,MTCH1,VPS37B,VPS51,MICALL2	35/-
10_Summary	GO Biological Processes	GO:0043087	regulation of GTPase activity	-7.49661	-4.47393	29,153,2149,2245,2889,5362,5747,6367,6376,7074,7410,8394,8412,9448,9639,9693,10235,10276,23380,26086,50861,55103,55558,57139,57572,85360,125058,129049,221472,255426,388,1026,1029,1795,1796,6242,9289,9743,10163,10630,10787,54453,57698,79574,116442,274,344,1365,4088,4824,5176,5894,6195,6272,6622,8434,9701,10395,23411,23787,55011,64115,114548	ABR,ADRB1,F2R,FGD1,RAPGEF1,PLXNA2,PTK2,CCL22,CX3CL1,TIAM1,VAV2,PIP5K1A,BCAR3,MAP4K4,ARHGEF10,RAPGEF2,RASGRP2,NET1,SRGAP2,GPSM1,STMN3,RALGPS2,PLXNA3,RGL3,DOCK6,SYDE1,TBC1D16,SGSM1,FGD2,RASGEF1C,RHOB,CDKN1A,CDKN2A,DOCK3,DOK1,RTKN,ADGRG1,ARHGAP32,WASF2,PDPN,NCKAP1,RIN2,SHTN1,EPS8L3,RAB39B,BIN1,APOC2,CLDN3,SMAD3,NKX3-1,SERPINF1,RAF1,RPS6KA1,SORT1,SNCA,RECK,PPP6R2,DLC1,SIRT1,MTCH1,PIH1D1,VSIR,NLRP3	63/-
11_Summary	WikiPathways	WP3929	Chemokine signaling pathway	-7.09849	-4.09601	208,2788,5568,5747,5894,6367,6376,6464,6777,7074,7410,9564,10000,10235,53358	AKT2,GNG7,PRKACG,PTK2,RAF1,CCL22,CX3CL1,SHC1,STAT5B,TIAM1,VAV2,BCAR1,AKT3,RASGRP2,SHC3	15/166
12_Summary	KEGG Pathway	hsa04530	Tight junction	-6.91634	-3.95165	861,1365,1740,2626,4301,5568,5601,5602,7074,7082,8777,9223,9693,10398,51422,57530,58494,79778,83700,154796,154810	RUNX1,CLDN3,DLG2,GATA4,AFDN,PRKACG,MAPK9,MAPK10,TIAM1,TJP1,MPDZ,MAGI1,RAPGEF2,MYL9,PRKAG2,CGN,JAM2,MICALL2,JAM3,AMOT,AMOTL1	21/-
13_Summary	GO Biological Processes	GO:0048871	multicellular organismal-level homeostasis	-6.85916	-3.9122	21,153,154,695,947,1365,1490,1958,2055,2149,2308,3624,3707,4756,5532,5568,6653,6659,6662,6777,6839,6886,7082,7414,8314,9289,9545,9696,10000,10365,22884,23371,23411,28514,57482,58494,64072,65267,79705,83700,90987,114781,114789,124976,171023	ABCA3,ADRB1,ADRB2,BTK,CD34,CLDN3,CCN2,EGR1,CLN8,F2R,FOXO1,INHBA,ITPKB,NEO1,PPP3CB,PRKACG,SORL1,SOX4,SOX9,STAT5B,SUV39H1,TAL1,TJP1,VCL,BAP1,ADGRG1,RAB3D,CROCC,AKT3,KLF2,WDR37,TNS2,SIRT1,DLL1,CRACD,JAM2,CDH23,WNK3,LRRK1,JAM3,ZNF251,BTBD9,SLC25A25,SPNS2,ASXL1	45/-
14_Summary	GO Biological Processes	GO:0098657	import into cell	-6.79222	-3.86229	154,274,1130,1238,1453,1455,1803,2055,2580,3177,3949,4040,4041,4065,4646,4973,5747,6272,6518,6553,6560,6565,6570,6622,6653,6844,7410,7525,8394,9154,9266,9372,9777,10163,10267,10894,10947,28514,53353,54453,54795,55716,66000,79874,81031,85021,92737,120103,126432,374868	ADRB2,BIN1,LYST,ACKR2,CSNK1D,CSNK1G2,DPP4,CLN8,GAK,SLC29A2,LDLR,LRP6,LRP5,LY75,MYO6,OLR1,PTK2,SORT1,SLC2A5,SLC9A5,SLC12A4,SLC15A2,SLC18A1,SNCA,SORL1,VAMP2,VAV2,YES1,PIP5K1A,SLC28A1,CYTH2,ZFYVE9,TM9SF4,WASF2,RAMP1,LYVE1,AP3M2,DLL1,LRP1B,RIN2,TRPM4,LMBR1L,TMEM108,RABEP2,SLC2A10,REPS1,DNER,SLC36A4,RINL,ATP9B	50/-
15_Summary	KEGG Pathway	hsa04068	FoxO signaling pathway	-6.71935	-3.82161	208,894,1026,1263,2308,3480,4088,4193,5601,5602,5894,7048,8660,9456,10000,10365,23411,51422,861,1021,1029,6464,6777,53358,2941,2946,2947,2948,4040,4041,5335,10023,816,2057,3459,3570,3164,7074,2626,3486,5532,3949,27436,695,2319,1365,4855,5629,7082,8726,28514,4145,7525,26469,200186,7414,26034,1958,5568,83660,115650,4301,7010,1906,8396,57459,84289,3597,5008,10401,338376,4824,5327,1493,6878,6882,9099…	AKT2,CCND2,CDKN1A,PLK3,FOXO1,IGF1R,SMAD3,MDM2,MAPK9,MAPK10,RAF1,TGFBR2,IRS2,HOMER1,AKT3,KLF2,SIRT1,PRKAG2,RUNX1,CDK6,CDKN2A,SHC1,STAT5B,SHC3,GSTA4,GSTM2,GSTM3,GSTM4,LRP6,LRP5,PLCG1,FRAT1,CAMK2B,EPOR,IFNGR1,IL6R,NR4A1,TIAM1,GATA4,IGFBP3,PPP3CB,LDLR,EML4,BTK,FLOT2,CLDN3,NOTCH4,PROX1,TJP1,EED,DLL1,MATK,YES1,PTPN18,CRTC2,VCL,IPCEF1,EGR1,PRKACG,TLN2,TNFRSF13C,AFDN,TEK,EDN1,PIP4K2B,GATAD2B,ING5,IL13RA1…	82/-
16_Summary	KEGG Pathway	hsa04024	cAMP signaling pathway	-6.58966	-3.72188	153,154,208,268,487,816,1259,1906,2149,4301,5140,5568,5601,5602,5727,5894,6662,7074,7410,8310,10000,10257,10398,56670,8660,57104,2626,2982,4882,5532	ADRB1,ADRB2,AKT2,AMH,ATP2A1,CAMK2B,CNGA1,EDN1,F2R,AFDN,PDE3B,PRKACG,MAPK9,MAPK10,PTCH1,RAF1,SOX9,TIAM1,VAV2,ACOX3,AKT3,ABCC4,MYL9,SUCNR1,IRS2,PNPLA2,GATA4,GUCY1A1,NPR2,PPP3CB	30/-
17_Summary	KEGG Pathway	hsa04015	Rap1 signaling pathway	-6.54795	-3.7082	208,1436,2149,2889,3480,4301,5217,5335,5894,6494,7010,7074,7410,9223,9564,9693,10000,10235,23683,54518,57568,83660,260425,695,2815,2982,5568,6915	AKT2,CSF1R,F2R,RAPGEF1,IGF1R,AFDN,PFN2,PLCG1,RAF1,SIPA1,TEK,TIAM1,VAV2,MAGI1,BCAR1,RAPGEF2,AKT3,RASGRP2,PRKD3,APBB1IP,SIPA1L2,TLN2,MAGI3,BTK,GP9,GUCY1A1,PRKACG,TBXA2R	28/-
18_Summary	GO Biological Processes	GO:0051960	regulation of nervous system development	-6.35049	-3.52411	274,816,1826,3949,4204,5176,5324,5362,5629,5783,6376,6497,6653,7074,8482,9253,9353,9693,9746,10810,22883,23105,23363,26011,28514,55502,55558,57154,57463,57556,57698,58494,79365,79953,80128,222223,644943,118,695,861,1960,3707,5991,6659,6777,7048,9760,54997,64115,84807,114548,88,153,154,1906,2055,2149,2982,3741,4897,5217,6560,6915,7410,8440,10000,10365,10787,23108,25959,54795,57482,65267,171023,194…	BIN1,CAMK2B,DSCAM,LDLR,MECP2,SERPINF1,PLAG1,PLXNA2,PROX1,PTPN13,CX3CL1,SKI,SORL1,TIAM1,SEMA7A,NUMBL,SLIT2,RAPGEF2,CLSTN3,WASF3,CLSTN1,FSTL4,OBSL1,TENM4,DLL1,HES6,PLXNA3,SMURF1,AMIGO1,SEMA6A,SHTN1,JAM2,BHLHE41,SYNDIG1,TRIM46,ELAPOR2,RASSF10,ADD1,BTK,RUNX1,EGR3,ITPKB,RFX3,SOX4,STAT5B,TGFBR2,TOX,TESC,VSIR,NFKBID,NLRP3,ACTN2,ADRB1,ADRB2,EDN1,CLN8,F2R,GUCY1A1,KCNA5,NRCAM,PFN2,SLC12A4,TBXA2R,VAV2,NCK2,…	93/-
19_Summary	GO Biological Processes	GO:0060322	head development	-6.32068	-3.51985	738,1021,1152,1436,1453,2057,2523,3480,3624,4040,4204,4211,4213,4897,5362,5629,5727,5830,5894,6497,6659,6662,7048,8482,8660,9253,9289,9353,9693,9760,10000,10395,22884,23030,23135,23353,23380,28514,54510,55558,55624,57463,64651,65109,66000,79147,79934,83696,84623,93986,140733,166614	VPS51,CDK6,CKB,CSF1R,CSNK1D,EPOR,FUT1,IGF1R,INHBA,LRP6,MECP2,MEIS1,MEIS3P1,NRCAM,PLXNA2,PROX1,PTCH1,PEX5,RAF1,SKI,SOX4,SOX9,TGFBR2,SEMA7A,IRS2,NUMBL,ADGRG1,SLIT2,RAPGEF2,TOX,AKT3,DLC1,WDR37,KDM4B,KDM6B,SUN1,SRGAP2,DLL1,PCDH18,PLXNA3,POMGNT1,AMIGO1,CSRNP1,UPF3B,TMEM108,FKRP,COQ8B,TRAPPC9,KIRREL3,FOXP2,MACROD2,DCLK2	52/-
20_Summary	GO Biological Processes	GO:0031401	positive regulation of protein modification process	-6.19446	-3.40586	154,894,1026,1365,1436,1453,1906,1958,2011,3570,3624,4824,5008,5217,5601,5629,5747,5894,6376,6622,6659,6662,7010,7048,7525,8412,8440,8482,8555,9618,9693,9722,10267,10395,10401,23043,23141,23181,23411,51422,55011,57161,64754,65267,79092,79705,85456,115825,221927,338376,338773,344,1826,3480,11284,25849	ADRB2,CCND2,CDKN1A,CLDN3,CSF1R,CSNK1D,EDN1,EGR1,MARK2,IL6R,INHBA,NKX3-1,OSM,PFN2,MAPK9,PROX1,PTK2,RAF1,CX3CL1,SNCA,SOX4,SOX9,TEK,TGFBR2,YES1,BCAR3,NCK2,SEMA7A,CDC14B,TRAF4,RAPGEF2,NOS1AP,RAMP1,DLC1,PIAS3,TNIK,ANKLE2,DIP2A,SIRT1,PRKAG2,PIH1D1,PELI2,SMYD3,WNK3,CARD14,LRRK1,TNKS1BP1,WDFY2,BRAT1,IFNE,TMEM119,APOC2,DSCAM,IGF1R,PNKP,PARM1	56/-
1_Member	GO Biological Processes	GO:0098609	cell-cell adhesion	-37.3326	-32.9877	460,947,1008,1296,1365,1740,1826,2267,4040,4041,4301,4756,4897,4973,6376,6464,6662,7048,7082,7414,8641,9708,9746,9752,10398,22859,22883,25945,26011,26025,26167,53834,54510,56097,56098,56099,56100,56101,56102,56103,56104,56105,56106,56107,56108,56109,56110,56111,56112,56113,56114,56126,56127,56131,56132,56133,56134,56135,56136,56137,56138,56139,56140,56141,56142,56143,56144,56145,56146,56147,57463…	ASTN1,CD34,CDH10,COL8A2,CLDN3,DLG2,DSCAM,FGL1,LRP6,LRP5,AFDN,NEO1,NRCAM,OLR1,CX3CL1,SHC1,SOX9,TGFBR2,TJP1,VCL,PCDHGB4,PCDHGA8,CLSTN3,PCDHA9,MYL9,ADGRL1,CLSTN1,NECTIN3,TENM4,PCDHGA12,PCDHB5,FGFRL1,PCDH18,PCDHGC5,PCDHGC4,PCDHGB7,PCDHGB6,PCDHGB5,PCDHGB3,PCDHGB2,PCDHGB1,PCDHGA11,PCDHGA10,PCDHGA9,PCDHGA7,PCDHGA6,PCDHGA5,PCDHGA4,PCDHGA3,PCDHGA2,PCDHGA1,PCDHB10,PCDHB9,PCDHB4,PCDHB3,PCDHB2,PCDHAC2,PCDHAC…	79/542
1_Member	GO Biological Processes	GO:0007156	homophilic cell adhesion via plasma membrane adhesion molecules	-31.423	-27.3791	1008,1826,8641,9708,9746,9752,22883,25945,26025,26167,54510,56097,56098,56099,56100,56101,56102,56103,56104,56105,56106,56107,56108,56109,56110,56111,56112,56113,56114,56126,56127,56131,56132,56133,56134,56135,56136,56137,56138,56139,56140,56141,56142,56143,56144,56145,56146,56147,57463,64072,84623,84966,221935	CDH10,DSCAM,PCDHGB4,PCDHGA8,CLSTN3,PCDHA9,CLSTN1,NECTIN3,PCDHGA12,PCDHB5,PCDH18,PCDHGC5,PCDHGC4,PCDHGB7,PCDHGB6,PCDHGB5,PCDHGB3,PCDHGB2,PCDHGB1,PCDHGA11,PCDHGA10,PCDHGA9,PCDHGA7,PCDHGA6,PCDHGA5,PCDHGA4,PCDHGA3,PCDHGA2,PCDHGA1,PCDHB10,PCDHB9,PCDHB4,PCDHB3,PCDHB2,PCDHAC2,PCDHAC1,PCDHA13,PCDHA12,PCDHA11,PCDHA10,PCDHA8,PCDHA7,PCDHA6,PCDHA5,PCDHA4,PCDHA3,PCDHA2,PCDHA1,AMIGO1,CDH23,KIRREL3,IGSF21,SDK1	53/167
1_Member	GO Biological Processes	GO:0098742	cell-cell adhesion via plasma-membrane adhesion molecules	-29.1941	-25.3263	1008,1365,1826,7048,8641,9708,9746,9752,22859,22883,25945,26011,26025,26167,53834,54510,56097,56098,56099,56100,56101,56102,56103,56104,56105,56106,56107,56108,56109,56110,56111,56112,56113,56114,56126,56127,56131,56132,56133,56134,56135,56136,56137,56138,56139,56140,56141,56142,56143,56144,56145,56146,56147,57463,64072,84623,84966,221935	CDH10,CLDN3,DSCAM,TGFBR2,PCDHGB4,PCDHGA8,CLSTN3,PCDHA9,ADGRL1,CLSTN1,NECTIN3,TENM4,PCDHGA12,PCDHB5,FGFRL1,PCDH18,PCDHGC5,PCDHGC4,PCDHGB7,PCDHGB6,PCDHGB5,PCDHGB3,PCDHGB2,PCDHGB1,PCDHGA11,PCDHGA10,PCDHGA9,PCDHGA7,PCDHGA6,PCDHGA5,PCDHGA4,PCDHGA3,PCDHGA2,PCDHGA1,PCDHB10,PCDHB9,PCDHB4,PCDHB3,PCDHB2,PCDHAC2,PCDHAC1,PCDHA13,PCDHA12,PCDHA11,PCDHA10,PCDHA8,PCDHA7,PCDHA6,PCDHA5,PCDHA4,PCDHA3,PCDHA2,PCDHA1,…	58/261
2_Member	GO Biological Processes	GO:0001944	vasculature development	-13.7573	-10.0144	388,947,1296,1490,1906,1948,1958,1960,2308,3164,3949,4041,4066,4193,4211,4327,4824,4855,4882,4897,5140,5311,5532,5629,5747,5784,5787,6376,6443,6464,6659,6886,7010,7048,7410,8434,9289,9353,9693,10163,10267,10630,11174,23411,23414,23509,25960,28514,30008,51162,56999,79893,81031,83700,154796,154810	RHOB,CD34,COL8A2,CCN2,EDN1,EFNB2,EGR1,EGR3,FOXO1,NR4A1,LDLR,LRP5,LYL1,MDM2,MEIS1,MMP19,NKX3-1,NOTCH4,NPR2,NRCAM,PDE3B,PKD2,PPP3CB,PROX1,PTK2,PTPN14,PTPRB,CX3CL1,SGCB,SHC1,SOX4,TAL1,TEK,TGFBR2,VAV2,RECK,ADGRG1,SLIT2,RAPGEF2,WASF2,RAMP1,PDPN,ADAMTS6,SIRT1,ZFPM2,POFUT1,ADGRA2,DLL1,EFEMP2,EGFL7,ADAMTS9,GGNBP2,SLC2A10,JAM3,AMOT,AMOTL1	56/547
2_Member	GO Biological Processes	GO:0001568	blood vessel development	-12.1878	-8.54182	388,947,1296,1490,1906,1948,1958,1960,2308,3164,3949,4041,4066,4193,4211,4327,4824,4855,4882,4897,5140,5311,5629,5747,5787,6376,6464,6659,6886,7010,7048,7410,8434,9289,9353,9693,10163,10267,11174,23411,23414,23509,25960,28514,30008,51162,56999,79893,81031,83700,154796,154810	RHOB,CD34,COL8A2,CCN2,EDN1,EFNB2,EGR1,EGR3,FOXO1,NR4A1,LDLR,LRP5,LYL1,MDM2,MEIS1,MMP19,NKX3-1,NOTCH4,NPR2,NRCAM,PDE3B,PKD2,PROX1,PTK2,PTPRB,CX3CL1,SHC1,SOX4,TAL1,TEK,TGFBR2,VAV2,RECK,ADGRG1,SLIT2,RAPGEF2,WASF2,RAMP1,ADAMTS6,SIRT1,ZFPM2,POFUT1,ADGRA2,DLL1,EFEMP2,EGFL7,ADAMTS9,GGNBP2,SLC2A10,JAM3,AMOT,AMOTL1	52/527
2_Member	GO Biological Processes	GO:0048514	blood vessel morphogenesis	-10.3363	-6.83653	388,947,1296,1490,1906,1948,1960,3164,3949,4041,4211,4327,4855,4882,4897,5140,5311,5629,5747,5787,6376,6464,6659,6886,7010,7048,7410,8434,9289,9353,10163,10267,23411,23414,23509,25960,28514,30008,51162,56999,83700,154796,154810	RHOB,CD34,COL8A2,CCN2,EDN1,EFNB2,EGR3,NR4A1,LDLR,LRP5,MEIS1,MMP19,NOTCH4,NPR2,NRCAM,PDE3B,PKD2,PROX1,PTK2,PTPRB,CX3CL1,SHC1,SOX4,TAL1,TEK,TGFBR2,VAV2,RECK,ADGRG1,SLIT2,WASF2,RAMP1,SIRT1,ZFPM2,POFUT1,ADGRA2,DLL1,EFEMP2,EGFL7,ADAMTS9,JAM3,AMOT,AMOTL1	43/431
2_Member	GO Biological Processes	GO:0035239	tube morphogenesis	-9.90814	-6.50542	388,947,1296,1436,1490,1906,1948,1960,2626,3164,3949,4041,4088,4211,4327,4824,4855,4882,4897,5140,5311,5629,5727,5747,5787,6376,6464,6497,6659,6662,6886,7010,7048,7410,8434,9289,9353,10163,10252,10267,10395,23411,23414,23509,25960,27443,28514,30008,51162,51339,55036,56999,83700,84913,154796,154810	RHOB,CD34,COL8A2,CSF1R,CCN2,EDN1,EFNB2,EGR3,GATA4,NR4A1,LDLR,LRP5,SMAD3,MEIS1,MMP19,NKX3-1,NOTCH4,NPR2,NRCAM,PDE3B,PKD2,PROX1,PTCH1,PTK2,PTPRB,CX3CL1,SHC1,SKI,SOX4,SOX9,TAL1,TEK,TGFBR2,VAV2,RECK,ADGRG1,SLIT2,WASF2,SPRY1,RAMP1,DLC1,SIRT1,ZFPM2,POFUT1,ADGRA2,CECR2,DLL1,EFEMP2,EGFL7,DACT1,CCDC40,ADAMTS9,JAM3,ATOH8,AMOT,AMOTL1	56/682
2_Member	GO Biological Processes	GO:0001525	angiogenesis	-8.96021	-5.69449	388,947,1296,1490,1906,1948,1960,3164,4211,4327,4855,4882,4897,5140,5747,5787,6376,6464,6886,7010,7048,7410,8434,9289,9353,10163,10267,23411,23509,25960,28514,51162,83700,154796,154810	RHOB,CD34,COL8A2,CCN2,EDN1,EFNB2,EGR3,NR4A1,MEIS1,MMP19,NOTCH4,NPR2,NRCAM,PDE3B,PTK2,PTPRB,CX3CL1,SHC1,TAL1,TEK,TGFBR2,VAV2,RECK,ADGRG1,SLIT2,WASF2,RAMP1,SIRT1,POFUT1,ADGRA2,DLL1,EGFL7,JAM3,AMOT,AMOTL1	35/338
3_Member	GO Biological Processes	GO:0034330	cell junction organization	-11.461	-7.89422	88,1008,1365,1436,1826,1948,2149,2556,2561,3480,4088,4204,4301,4897,5217,6272,6376,6622,7082,7414,8394,8777,9253,9456,9722,9746,10163,10395,10810,23181,23380,26167,27445,56097,56098,56126,56127,56131,56132,56133,66000,79147,79778,83660,83700,84623,84966,85461,92737,116442,221935	ACTN2,CDH10,CLDN3,CSF1R,DSCAM,EFNB2,F2R,GABRA3,GABRB2,IGF1R,SMAD3,MECP2,AFDN,NRCAM,PFN2,SORT1,CX3CL1,SNCA,TJP1,VCL,PIP5K1A,MPDZ,NUMBL,HOMER1,NOS1AP,CLSTN3,WASF2,DLC1,WASF3,DIP2A,SRGAP2,PCDHB5,PCLO,PCDHGC5,PCDHGC4,PCDHB10,PCDHB9,PCDHB4,PCDHB3,PCDHB2,TMEM108,FKRP,MICALL2,TLN2,JAM3,KIRREL3,IGSF21,TANC1,DNER,RAB39B,SDK1	51/533
3_Member	GO Biological Processes	GO:0050808	synapse organization	-8.99453	-5.69449	1008,1826,2149,2556,2561,3480,4204,4897,5217,6272,6376,6622,9456,9722,9746,10163,10810,23181,23380,26167,27445,56097,56098,56126,56127,56131,56132,56133,66000,84623,84966,85461,92737,116442,221935	CDH10,DSCAM,F2R,GABRA3,GABRB2,IGF1R,MECP2,NRCAM,PFN2,SORT1,CX3CL1,SNCA,HOMER1,NOS1AP,CLSTN3,WASF2,WASF3,DIP2A,SRGAP2,PCDHB5,PCLO,PCDHGC5,PCDHGC4,PCDHB10,PCDHB9,PCDHB4,PCDHB3,PCDHB2,TMEM108,KIRREL3,IGSF21,TANC1,DNER,RAB39B,SDK1	35/337
3_Member	GO Biological Processes	GO:0034329	cell junction assembly	-8.00875	-4.90311	88,1008,1365,1826,2556,2561,4204,4301,4897,7082,7414,8394,8777,9746,10395,23380,26167,27445,56126,56127,56131,56132,56133,79147,79778,83660,83700,84623,92737,221935	ACTN2,CDH10,CLDN3,DSCAM,GABRA3,GABRB2,MECP2,AFDN,NRCAM,TJP1,VCL,PIP5K1A,MPDZ,CLSTN3,DLC1,SRGAP2,PCDHB5,PCLO,PCDHB10,PCDHB9,PCDHB4,PCDHB3,PCDHB2,FKRP,MICALL2,TLN2,JAM3,KIRREL3,DNER,SDK1	30/283
3_Member	GO Biological Processes	GO:0007416	synapse assembly	-6.73791	-3.82437	1826,2556,2561,4204,4897,9746,23380,26167,27445,56126,56127,56131,56132,56133,84623,92737,221935	DSCAM,GABRA3,GABRB2,MECP2,NRCAM,CLSTN3,SRGAP2,PCDHB5,PCLO,PCDHB10,PCDHB9,PCDHB4,PCDHB3,PCDHB2,KIRREL3,DNER,SDK1	17/117
3_Member	GO Biological Processes	GO:0099537	trans-synaptic signaling	-5.41283	-2.85585	320,321,1740,1960,2149,2556,2561,2901,2982,3164,4040,4204,4882,5327,6195,6196,6560,6622,6844,7915,9456,9746,9751,9783,26167,27445,56126,56127,56131,56132,56133,66004,116372	APBA1,APBA2,DLG2,EGR3,F2R,GABRA3,GABRB2,GRIK5,GUCY1A1,NR4A1,LRP6,MECP2,NPR2,PLAT,RPS6KA1,RPS6KA2,SLC12A4,SNCA,VAMP2,ALDH5A1,HOMER1,CLSTN3,SNPH,RIMS3,PCDHB5,PCLO,PCDHB10,PCDHB9,PCDHB4,PCDHB3,PCDHB2,LYNX1,LYPD1	33/432
3_Member	GO Biological Processes	GO:0016339	calcium-dependent cell-cell adhesion via plasma membrane cell adhesion molecules	-4.99433	-2.58393	1008,8641,26167,56126,56127,56131,56132,56133,64072	CDH10,PCDHGB4,PCDHB5,PCDHB10,PCDHB9,PCDHB4,PCDHB3,PCDHB2,CDH23	9/45
3_Member	GO Biological Processes	GO:0099536	synaptic signaling	-4.82659	-2.46846	320,321,1740,1960,2149,2556,2561,2901,2982,3164,4040,4204,4882,5327,6195,6196,6560,6622,6844,7915,9456,9746,9751,9783,26167,27445,56126,56127,56131,56132,56133,66004,116372	APBA1,APBA2,DLG2,EGR3,F2R,GABRA3,GABRB2,GRIK5,GUCY1A1,NR4A1,LRP6,MECP2,NPR2,PLAT,RPS6KA1,RPS6KA2,SLC12A4,SNCA,VAMP2,ALDH5A1,HOMER1,CLSTN3,SNPH,RIMS3,PCDHB5,PCLO,PCDHB10,PCDHB9,PCDHB4,PCDHB3,PCDHB2,LYNX1,LYPD1	33/461
3_Member	GO Biological Processes	GO:0007268	chemical synaptic transmission	-4.52423	-2.25851	320,321,1740,1960,2556,2561,2901,3164,4040,4204,4882,6195,6196,6560,6622,6844,7915,9456,9746,9751,9783,26167,27445,56126,56127,56131,56132,56133,66004,116372	APBA1,APBA2,DLG2,EGR3,GABRA3,GABRB2,GRIK5,NR4A1,LRP6,MECP2,NPR2,RPS6KA1,RPS6KA2,SLC12A4,SNCA,VAMP2,ALDH5A1,HOMER1,CLSTN3,SNPH,RIMS3,PCDHB5,PCLO,PCDHB10,PCDHB9,PCDHB4,PCDHB3,PCDHB2,LYNX1,LYPD1	30/415
3_Member	GO Biological Processes	GO:0098916	anterograde trans-synaptic signaling	-4.52423	-2.25851	320,321,1740,1960,2556,2561,2901,3164,4040,4204,4882,6195,6196,6560,6622,6844,7915,9456,9746,9751,9783,26167,27445,56126,56127,56131,56132,56133,66004,116372	APBA1,APBA2,DLG2,EGR3,GABRA3,GABRB2,GRIK5,NR4A1,LRP6,MECP2,NPR2,RPS6KA1,RPS6KA2,SLC12A4,SNCA,VAMP2,ALDH5A1,HOMER1,CLSTN3,SNPH,RIMS3,PCDHB5,PCLO,PCDHB10,PCDHB9,PCDHB4,PCDHB3,PCDHB2,LYNX1,LYPD1	30/415
4_Member	GO Biological Processes	GO:0016310	phosphorylation	-9.89608	-6.50542	208,695,816,1021,1025,1119,1152,1263,1436,1453,1455,1606,2011,2580,3480,3486,3656,3707,4145,4342,5166,5532,5568,5601,5602,5747,5894,6195,6196,7010,7048,7525,8394,8395,8396,8621,9263,9448,10000,10922,11213,11284,22845,23031,23043,23683,25989,51422,57538,65267,79705,79707,80271,83694,83983,91461,140901,166614	AKT2,BTK,CAMK2B,CDK6,CDK9,CHKA,CKB,PLK3,CSF1R,CSNK1D,CSNK1G2,DGKA,MARK2,GAK,IGF1R,IGFBP3,IRAK2,ITPKB,MATK,MOS,PDK4,PPP3CB,PRKACG,MAPK9,MAPK10,PTK2,RAF1,RPS6KA1,RPS6KA2,TEK,TGFBR2,YES1,PIP5K1A,PIP5K1B,PIP4K2B,CDK13,STK17A,MAP4K4,AKT3,FASTK,IRAK3,PNKP,DOLK,MAST3,TNIK,PRKD3,ULK3,PRKAG2,ALPK3,WNK3,LRRK1,NOL9,ITPKC,RPS6KL1,TSSK6,PKDCC,STK35,DCLK2	58/721
4_Member	GO Biological Processes	GO:0006468	protein phosphorylation	-8.09074	-4.92193	208,695,816,1021,1025,1263,1436,1453,1455,2011,3480,3486,3656,4145,4342,5166,5532,5568,5601,5602,5747,5894,6195,6196,7048,7525,8621,9263,9448,10000,10922,11213,23031,23043,23683,25989,51422,65267,79705,83983,91461,140901	AKT2,BTK,CAMK2B,CDK6,CDK9,PLK3,CSF1R,CSNK1D,CSNK1G2,MARK2,IGF1R,IGFBP3,IRAK2,MATK,MOS,PDK4,PPP3CB,PRKACG,MAPK9,MAPK10,PTK2,RAF1,RPS6KA1,RPS6KA2,TGFBR2,YES1,CDK13,STK17A,MAP4K4,AKT3,FASTK,IRAK3,MAST3,TNIK,PRKD3,ULK3,PRKAG2,WNK3,LRRK1,TSSK6,PKDCC,STK35	42/491
4_Member	GO Biological Processes	GO:0018193	peptidyl-amino acid modification	-2.85775	-1.14282	208,695,816,1436,1453,1455,1801,2011,2590,3480,4193,5568,5601,5747,6195,6196,8460,9397,10000,10401,23031,23411,25989,26054,51126,51304,54795,55471,65267,91461	AKT2,BTK,CAMK2B,CSF1R,CSNK1D,CSNK1G2,DPH1,MARK2,GALNT2,IGF1R,MDM2,PRKACG,MAPK9,PTK2,RPS6KA1,RPS6KA2,TPST1,NMT2,AKT3,PIAS3,MAST3,SIRT1,ULK3,SENP6,NAA20,ZDHHC3,TRPM4,NDUFAF7,WNK3,PKDCC	30/520
4_Member	GO Biological Processes	GO:0018209	peptidyl-serine modification	-2.38992	-0.853899	208,816,1453,1455,2011,2590,5568,5601,6195,6196,10000,23031,25989	AKT2,CAMK2B,CSNK1D,CSNK1G2,MARK2,GALNT2,PRKACG,MAPK9,RPS6KA1,RPS6KA2,AKT3,MAST3,ULK3	13/175
4_Member	GO Biological Processes	GO:0018105	peptidyl-serine phosphorylation	-2.2167	-0.750317	208,816,1453,1455,2011,5568,5601,6195,6196,10000,23031,25989	AKT2,CAMK2B,CSNK1D,CSNK1G2,MARK2,PRKACG,MAPK9,RPS6KA1,RPS6KA2,AKT3,MAST3,ULK3	12/163
5_Member	GO Biological Processes	GO:0051056	regulation of small GTPase mediated signal transduction	-9.60434	-6.25944	29,1795,2149,2245,3707,5894,6494,7010,7074,7410,9265,9266,9289,9353,9448,9639,9743,10252,10276,10395,22821,23108,23229,23263,23380,25894,25959,50861,57480,57568,79574,85360,154796,221472	ABR,DOCK3,F2R,FGD1,ITPKB,RAF1,SIPA1,TEK,TIAM1,VAV2,CYTH3,CYTH2,ADGRG1,SLIT2,MAP4K4,ARHGEF10,ARHGAP32,SPRY1,NET1,DLC1,RASA3,RAP1GAP2,ARHGEF9,MCF2L,SRGAP2,PLEKHG4,KANK2,STMN3,PLEKHG1,SIPA1L2,EPS8L3,SYDE1,AMOT,FGD2	34/304
5_Member	Reactome Gene Sets	R-HSA-416482	G alpha (12/13) signalling events	-6.67607	-3.79357	29,388,695,2245,2788,6915,7074,7410,9639,10276,23229,23263,221472,389337	ABR,RHOB,BTK,FGD1,GNG7,TBXA2R,TIAM1,VAV2,ARHGEF10,NET1,ARHGEF9,MCF2L,FGD2,ARHGEF37	14/80
5_Member	Reactome Gene Sets	R-HSA-9012999	RHO GTPase cycle	-5.47457	-2.87204	29,388,1152,1795,2245,2319,2889,4646,5783,6242,7074,7410,7919,8440,9217,9639,9743,10163,10276,10395,10652,10787,10810,10970,23141,23229,23263,23380,25894,29062,57480,57572,85360,221472	ABR,RHOB,CKB,DOCK3,FGD1,FLOT2,RAPGEF1,MYO6,PTPN13,RTKN,TIAM1,VAV2,DDX39B,NCK2,VAPB,ARHGEF10,ARHGAP32,WASF2,NET1,DLC1,YKT6,NCKAP1,WASF3,CKAP4,ANKLE2,ARHGEF9,MCF2L,SRGAP2,PLEKHG4,WDR91,PLEKHG1,DOCK6,SYDE1,FGD2	34/449
5_Member	Reactome Gene Sets	R-HSA-9013148	CDC42 GTPase cycle	-5.01593	-2.5901	29,2245,7074,7410,9639,9743,10395,10652,23229,23263,23380,25894,29062,57480,57572,85360,221472	ABR,FGD1,TIAM1,VAV2,ARHGEF10,ARHGAP32,DLC1,YKT6,ARHGEF9,MCF2L,SRGAP2,PLEKHG4,WDR91,PLEKHG1,DOCK6,SYDE1,FGD2	17/155
5_Member	Reactome Gene Sets	R-HSA-193648	NRAGE signals death through JNK	-4.81205	-2.45837	29,2245,7074,7410,9639,10276,23229,23263,221472,389337	ABR,FGD1,TIAM1,VAV2,ARHGEF10,NET1,ARHGEF9,MCF2L,FGD2,ARHGEF37	10/59
5_Member	Canonical Pathways	M83	PID CDC42 REG PATHWAY	-4.46224	-2.21075	2245,5335,7410,8412,23229,23263,57572	FGD1,PLCG1,VAV2,BCAR3,ARHGEF9,MCF2L,DOCK6	7/30
5_Member	Reactome Gene Sets	R-HSA-9013026	RHOB GTPase cycle	-4.14857	-1.97686	29,388,2319,6242,7410,9639,9743,10276,10395,23263	ABR,RHOB,FLOT2,RTKN,VAV2,ARHGEF10,ARHGAP32,NET1,DLC1,MCF2L	10/70
5_Member	Reactome Gene Sets	R-HSA-204998	Cell death signalling via NRAGE, NRIF and NADE	-3.8417	-1.78717	29,2245,7074,7410,9639,10276,23229,23263,221472,389337	ABR,FGD1,TIAM1,VAV2,ARHGEF10,NET1,ARHGEF9,MCF2L,FGD2,ARHGEF37	10/76
5_Member	Reactome Gene Sets	R-HSA-9013149	RAC1 GTPase cycle	-3.5259	-1.55757	29,1795,7074,7410,9639,9743,10163,10395,10652,10787,10810,23263,23380,25894,57480,57572	ABR,DOCK3,TIAM1,VAV2,ARHGEF10,ARHGAP32,WASF2,DLC1,YKT6,NCKAP1,WASF3,MCF2L,SRGAP2,PLEKHG4,PLEKHG1,DOCK6	16/185
5_Member	Reactome Gene Sets	R-HSA-9013106	RHOC GTPase cycle	-3.25517	-1.40023	29,2319,6242,7410,9217,9639,9743,10395,23263	ABR,FLOT2,RTKN,VAV2,VAPB,ARHGEF10,ARHGAP32,DLC1,MCF2L	9/74
5_Member	Reactome Gene Sets	R-HSA-8980692	RHOA GTPase cycle	-3.063	-1.28088	29,2319,6242,7074,7410,9217,9639,9743,10276,10395,10652,23263,25894	ABR,FLOT2,RTKN,TIAM1,VAV2,VAPB,ARHGEF10,ARHGAP32,NET1,DLC1,YKT6,MCF2L,PLEKHG4	13/147
5_Member	Reactome Gene Sets	R-HSA-193704	p75 NTR receptor-mediated signalling	-2.98141	-1.2298	29,2245,7074,7410,9639,10276,23229,23263,221472,389337	ABR,FGD1,TIAM1,VAV2,ARHGEF10,NET1,ARHGEF9,MCF2L,FGD2,ARHGEF37	10/97
5_Member	Reactome Gene Sets	R-HSA-194315	Signaling by Rho GTPases	-2.90303	-1.17197	29,388,695,1152,1795,2245,2319,2889,4646,5217,5747,5783,6242,7074,7410,7919,8440,9217,9639,9743,10163,10276,10395,10398,10652,10787,10810,10970,23141,23229,23263,23380,25894,29062,57480,57572,85360,221472	ABR,RHOB,BTK,CKB,DOCK3,FGD1,FLOT2,RAPGEF1,MYO6,PFN2,PTK2,PTPN13,RTKN,TIAM1,VAV2,DDX39B,NCK2,VAPB,ARHGEF10,ARHGAP32,WASF2,NET1,DLC1,MYL9,YKT6,NCKAP1,WASF3,CKAP4,ANKLE2,ARHGEF9,MCF2L,SRGAP2,PLEKHG4,WDR91,PLEKHG1,DOCK6,SYDE1,FGD2	38/706
5_Member	Reactome Gene Sets	R-HSA-9716542	Signaling by Rho GTPases, Miro GTPases and RHOBTB3	-2.73225	-1.07129	29,388,695,1152,1795,2245,2319,2889,4646,5217,5747,5783,6242,7074,7410,7919,8440,9217,9639,9743,10163,10276,10395,10398,10652,10787,10810,10970,23141,23229,23263,23380,25894,29062,57480,57572,85360,221472	ABR,RHOB,BTK,CKB,DOCK3,FGD1,FLOT2,RAPGEF1,MYO6,PFN2,PTK2,PTPN13,RTKN,TIAM1,VAV2,DDX39B,NCK2,VAPB,ARHGEF10,ARHGAP32,WASF2,NET1,DLC1,MYL9,YKT6,NCKAP1,WASF3,CKAP4,ANKLE2,ARHGEF9,MCF2L,SRGAP2,PLEKHG4,WDR91,PLEKHG1,DOCK6,SYDE1,FGD2	38/722
5_Member	Canonical Pathways	M68	PID RHOA REG PATHWAY	-2.49218	-0.916655	29,7410,9639,10276,10395,23263	ABR,VAV2,ARHGEF10,NET1,DLC1,MCF2L	6/46
5_Member	Reactome Gene Sets	R-HSA-73887	Death Receptor Signaling	-2.41206	-0.865803	29,2245,7074,7375,7410,9099,9639,10276,23229,23263,221472,389337	ABR,FGD1,TIAM1,USP4,VAV2,USP2,ARHGEF10,NET1,ARHGEF9,MCF2L,FGD2,ARHGEF37	12/154
6_Member	GO Biological Processes	GO:0007167	enzyme-linked receptor protein signaling pathway	-8.33778	-5.10682	154,208,1436,1490,1795,1796,1948,1958,2067,2308,2788,2889,3480,3624,4088,4882,5166,5327,5335,5747,5793,5894,6272,6464,6497,6662,6777,7010,7048,7074,7410,7525,8412,8440,8660,9019,9372,9392,9564,9693,10220,10849,23411,53358,53834,57154,60436,64651,84913	ADRB2,AKT2,CSF1R,CCN2,DOCK3,DOK1,EFNB2,EGR1,ERCC1,FOXO1,GNG7,RAPGEF1,IGF1R,INHBA,SMAD3,NPR2,PDK4,PLAT,PLCG1,PTK2,PTPRG,RAF1,SORT1,SHC1,SKI,SOX9,STAT5B,TEK,TGFBR2,TIAM1,VAV2,YES1,BCAR3,NCK2,IRS2,MPZL1,ZFYVE9,TGFBRAP1,BCAR1,RAPGEF2,GDF11,POLR1G,SIRT1,SHC3,FGFRL1,SMURF1,TGIF2,CSRNP1,ATOH8	49/614
6_Member	GO Biological Processes	GO:0007169	transmembrane receptor protein tyrosine kinase signaling pathway	-7.07444	-4.09126	154,208,1436,1490,1795,1796,1948,2067,2308,2889,3480,4882,5166,5327,5335,5747,5793,5894,6272,6464,6662,6777,7010,7074,7410,7525,8412,8440,8660,9019,9564,9693,10849,53358,53834,64651	ADRB2,AKT2,CSF1R,CCN2,DOCK3,DOK1,EFNB2,ERCC1,FOXO1,RAPGEF1,IGF1R,NPR2,PDK4,PLAT,PLCG1,PTK2,PTPRG,RAF1,SORT1,SHC1,SOX9,STAT5B,TEK,TIAM1,VAV2,YES1,BCAR3,NCK2,IRS2,MPZL1,BCAR1,RAPGEF2,POLR1G,SHC3,FGFRL1,CSRNP1	36/419
6_Member	GO Biological Processes	GO:1901652	response to peptide	-5.06902	-2.62721	88,154,208,599,1906,1958,2308,3164,3480,3624,3663,4040,4041,4088,4193,4882,5140,5166,5176,5747,5894,6272,6443,6464,6777,6844,7010,8412,8660,9564,10365,10768,23411,23641	ACTN2,ADRB2,AKT2,BCL2L2,EDN1,EGR1,FOXO1,NR4A1,IGF1R,INHBA,IRF5,LRP6,LRP5,SMAD3,MDM2,NPR2,PDE3B,PDK4,SERPINF1,PTK2,RAF1,SORT1,SGCB,SHC1,STAT5B,VAMP2,TEK,BCAR3,IRS2,BCAR1,KLF2,AHCYL1,SIRT1,LDOC1	34/469
6_Member	GO Biological Processes	GO:0071417	cellular response to organonitrogen compound	-5.001	-2.58393	88,154,208,599,1906,1958,2308,2561,2889,2946,3164,3480,3624,4193,4204,4882,5140,5166,5311,5747,5894,6443,6464,6470,6662,6777,6844,8412,8660,9353,9564,9693,10365,10768,23641,54795,57463,729438	ACTN2,ADRB2,AKT2,BCL2L2,EDN1,EGR1,FOXO1,GABRB2,RAPGEF1,GSTM2,NR4A1,IGF1R,INHBA,MDM2,MECP2,NPR2,PDE3B,PDK4,PKD2,PTK2,RAF1,SGCB,SHC1,SHMT1,SOX9,STAT5B,VAMP2,BCAR3,IRS2,SLIT2,BCAR1,RAPGEF2,KLF2,AHCYL1,LDOC1,TRPM4,AMIGO1,CASTOR2	38/556
6_Member	GO Biological Processes	GO:1901653	cellular response to peptide	-4.57229	-2.28882	88,154,208,599,1906,2308,3164,3480,3624,4193,4882,5140,5166,5747,5894,6443,6464,6777,6844,8412,8660,9564,10365,10768,23641	ACTN2,ADRB2,AKT2,BCL2L2,EDN1,FOXO1,NR4A1,IGF1R,INHBA,MDM2,NPR2,PDE3B,PDK4,PTK2,RAF1,SGCB,SHC1,STAT5B,VAMP2,BCAR3,IRS2,BCAR1,KLF2,AHCYL1,LDOC1	25/313
6_Member	GO Biological Processes	GO:0043434	response to peptide hormone	-4.38984	-2.16221	88,208,1906,1958,2308,3164,3480,3624,4040,4041,4088,4193,4882,5140,5166,5747,5894,6272,6443,6464,6777,6844,7010,8412,8660,9564,10768,23411	ACTN2,AKT2,EDN1,EGR1,FOXO1,NR4A1,IGF1R,INHBA,LRP6,LRP5,SMAD3,MDM2,NPR2,PDE3B,PDK4,PTK2,RAF1,SORT1,SGCB,SHC1,STAT5B,VAMP2,TEK,BCAR3,IRS2,BCAR1,AHCYL1,SIRT1	28/381
6_Member	GO Biological Processes	GO:1901699	cellular response to nitrogen compound	-4.14895	-1.97686	88,154,208,599,1906,1958,2308,2561,2889,2946,3164,3480,3624,4193,4204,4882,5140,5166,5311,5747,5894,6443,6464,6470,6662,6777,6844,8412,8660,9353,9564,9693,10365,10768,23641,54795,57463,116372,729438	ACTN2,ADRB2,AKT2,BCL2L2,EDN1,EGR1,FOXO1,GABRB2,RAPGEF1,GSTM2,NR4A1,IGF1R,INHBA,MDM2,MECP2,NPR2,PDE3B,PDK4,PKD2,PTK2,RAF1,SGCB,SHC1,SHMT1,SOX9,STAT5B,VAMP2,BCAR3,IRS2,SLIT2,BCAR1,RAPGEF2,KLF2,AHCYL1,LDOC1,TRPM4,AMIGO1,LYPD1,CASTOR2	39/631
6_Member	GO Biological Processes	GO:0071375	cellular response to peptide hormone stimulus	-3.83841	-1.78717	88,208,1906,2308,3164,3480,3624,4193,5140,5166,5747,5894,6443,6464,6777,6844,8412,8660,9564,10768	ACTN2,AKT2,EDN1,FOXO1,NR4A1,IGF1R,INHBA,MDM2,PDE3B,PDK4,PTK2,RAF1,SGCB,SHC1,STAT5B,VAMP2,BCAR3,IRS2,BCAR1,AHCYL1	20/248
6_Member	GO Biological Processes	GO:0071363	cellular response to growth factor stimulus	-3.62697	-1.62449	1453,1490,1795,1906,1958,1960,2889,3164,3480,4088,4193,5335,5747,5894,6272,6464,6497,6662,6777,7048,7525,9372,9392,9564,9693,9775,23411,53834,57154,57556,66000	CSNK1D,CCN2,DOCK3,EDN1,EGR1,EGR3,RAPGEF1,NR4A1,IGF1R,SMAD3,MDM2,PLCG1,PTK2,RAF1,SORT1,SHC1,SKI,SOX9,STAT5B,TGFBR2,YES1,ZFYVE9,TGFBRAP1,BCAR1,RAPGEF2,EIF4A3,SIRT1,FGFRL1,SMURF1,SEMA6A,TMEM108	31/488
6_Member	GO Biological Processes	GO:0008286	insulin receptor signaling pathway	-3.53244	-1.56045	208,2308,3480,5166,5894,6464,8412,8660,9564	AKT2,FOXO1,IGF1R,PDK4,RAF1,SHC1,BCAR3,IRS2,BCAR1	9/68
6_Member	GO Biological Processes	GO:0070848	response to growth factor	-3.48105	-1.5306	1453,1490,1795,1906,1958,1960,2889,3164,3480,4088,4193,4882,5335,5747,5894,6272,6464,6497,6662,6777,7048,7525,9372,9392,9564,9693,9775,23411,53834,57154,57556,66000	CSNK1D,CCN2,DOCK3,EDN1,EGR1,EGR3,RAPGEF1,NR4A1,IGF1R,SMAD3,MDM2,NPR2,PLCG1,PTK2,RAF1,SORT1,SHC1,SKI,SOX9,STAT5B,TGFBR2,YES1,ZFYVE9,TGFBRAP1,BCAR1,RAPGEF2,EIF4A3,SIRT1,FGFRL1,SMURF1,SEMA6A,TMEM108	32/520
6_Member	GO Biological Processes	GO:0009725	response to hormone	-3.09623	-1.29557	21,88,208,1026,1906,1958,2308,2947,3164,3480,3624,4040,4041,4088,4193,4824,4882,5140,5166,5176,5747,5894,6272,6443,6464,6777,6844,7010,7035,8412,8611,8647,8660,9353,9564,10267,10270,10768,23411,64754,79147,163732	ABCA3,ACTN2,AKT2,CDKN1A,EDN1,EGR1,FOXO1,GSTM3,NR4A1,IGF1R,INHBA,LRP6,LRP5,SMAD3,MDM2,NKX3-1,NPR2,PDE3B,PDK4,SERPINF1,PTK2,RAF1,SORT1,SGCB,SHC1,STAT5B,VAMP2,TEK,TFPI,BCAR3,PLPP1,ABCB11,IRS2,SLIT2,BCAR1,RAMP1,AKAP8,AHCYL1,SIRT1,SMYD3,FKRP,CITED4	42/785
6_Member	GO Biological Processes	GO:0032870	cellular response to hormone stimulus	-2.76494	-1.0899	88,208,1906,2308,3164,3480,3624,4193,4824,5140,5166,5176,5747,5894,6443,6464,6777,6844,7035,8412,8611,8660,9353,9564,10267,10270,10768,23411,64754	ACTN2,AKT2,EDN1,FOXO1,NR4A1,IGF1R,INHBA,MDM2,NKX3-1,PDE3B,PDK4,SERPINF1,PTK2,RAF1,SGCB,SHC1,STAT5B,VAMP2,TFPI,BCAR3,PLPP1,IRS2,SLIT2,BCAR1,RAMP1,AKAP8,AHCYL1,SIRT1,SMYD3	29/504
6_Member	GO Biological Processes	GO:0032869	cellular response to insulin stimulus	-2.50481	-0.919275	208,2308,3480,5140,5166,5894,6443,6464,6844,8412,8660,9564	AKT2,FOXO1,IGF1R,PDE3B,PDK4,RAF1,SGCB,SHC1,VAMP2,BCAR3,IRS2,BCAR1	12/150
6_Member	GO Biological Processes	GO:0032868	response to insulin	-2.35869	-0.833986	208,1958,2308,3480,5140,5166,5894,6272,6443,6464,6844,8412,8660,9564,23411	AKT2,EGR1,FOXO1,IGF1R,PDE3B,PDK4,RAF1,SORT1,SGCB,SHC1,VAMP2,BCAR3,IRS2,BCAR1,SIRT1	15/218
7_Member	WikiPathways	WP5434	Pathways in cancer	-8.10822	-4.92193	208,816,861,894,1021,1026,1029,1436,1906,2057,2149,2308,2788,2941,2946,2947,2948,3459,3480,3570,3597,4040,4041,4088,4193,4824,4855,5335,5568,5601,5602,5727,5747,5894,6777,7048,7188,9618,10000,10023,10235,27436,28514	AKT2,CAMK2B,RUNX1,CCND2,CDK6,CDKN1A,CDKN2A,CSF1R,EDN1,EPOR,F2R,FOXO1,GNG7,GSTA4,GSTM2,GSTM3,GSTM4,IFNGR1,IGF1R,IL6R,IL13RA1,LRP6,LRP5,SMAD3,MDM2,NKX3-1,NOTCH4,PLCG1,PRKACG,MAPK9,MAPK10,PTCH1,PTK2,RAF1,STAT5B,TGFBR2,TRAF5,TRAF4,AKT3,FRAT1,RASGRP2,EML4,DLL1	43/509
7_Member	KEGG Pathway	hsa05200	Pathways in cancer	-7.57383	-4.52996	208,816,861,894,1021,1026,1029,1436,1906,2057,2149,2308,2788,2941,2946,2947,2948,3459,3480,3570,3597,4040,4041,4088,4193,4824,4855,5335,5568,5601,5602,5727,5747,5894,6777,7048,7188,9618,10000,10023,10235,27436,28514	AKT2,CAMK2B,RUNX1,CCND2,CDK6,CDKN1A,CDKN2A,CSF1R,EDN1,EPOR,F2R,FOXO1,GNG7,GSTA4,GSTM2,GSTM3,GSTM4,IFNGR1,IGF1R,IL6R,IL13RA1,LRP6,LRP5,SMAD3,MDM2,NKX3-1,NOTCH4,PLCG1,PRKACG,MAPK9,MAPK10,PTCH1,PTK2,RAF1,STAT5B,TGFBR2,TRAF5,TRAF4,AKT3,FRAT1,RASGRP2,EML4,DLL1	43/531
7_Member	WikiPathways	WP5087	Pleural mesothelioma	-4.85556	-2.48378	208,894,1008,1026,1029,1436,1490,2308,3480,4040,4041,4193,5176,5601,5602,5747,5894,6195,6464,7010,8314,8726,9448,10000,10023,23043,51422,114548,147111,154796,171023,389421	AKT2,CCND2,CDH10,CDKN1A,CDKN2A,CSF1R,CCN2,FOXO1,IGF1R,LRP6,LRP5,MDM2,SERPINF1,MAPK9,MAPK10,PTK2,RAF1,RPS6KA1,SHC1,TEK,BAP1,EED,MAP4K4,AKT3,FRAT1,TNIK,PRKAG2,NLRP3,NOTUM,AMOT,ASXL1,LIN28B	32/439
8_Member	GO Biological Processes	GO:0007507	heart development	-8.01298	-4.90311	88,1026,1906,2057,2626,3480,3624,4088,4193,4204,4211,4824,5311,5532,5629,5727,5747,6196,6443,6464,6497,6659,6662,7010,7048,7168,9353,10252,10395,11117,11155,11174,23135,23363,23414,23509,26011,28514,53834,55036,56999,57538,79147,80114,171023,203286	ACTN2,CDKN1A,EDN1,EPOR,GATA4,IGF1R,INHBA,SMAD3,MDM2,MECP2,MEIS1,NKX3-1,PKD2,PPP3CB,PROX1,PTCH1,PTK2,RPS6KA2,SGCB,SHC1,SKI,SOX4,SOX9,TEK,TGFBR2,TPM1,SLIT2,SPRY1,DLC1,EMILIN1,LDB3,ADAMTS6,KDM6B,OBSL1,ZFPM2,POFUT1,TENM4,DLL1,FGFRL1,CCDC40,ADAMTS9,ALPK3,FKRP,BICC1,ASXL1,ANKS6	46/570
8_Member	GO Biological Processes	GO:0003007	heart morphogenesis	-4.39763	-2.16667	1906,2626,4088,4193,5311,5629,5727,5747,6659,6662,7010,7048,7168,9353,10252,10395,23414,28514,53834,55036,79147,171023	EDN1,GATA4,SMAD3,MDM2,PKD2,PROX1,PTCH1,PTK2,SOX4,SOX9,TEK,TGFBR2,TPM1,SLIT2,SPRY1,DLC1,ZFPM2,DLL1,FGFRL1,CCDC40,FKRP,ASXL1	22/263
8_Member	GO Biological Processes	GO:0001822	kidney development	-4.35684	-2.13904	947,1906,1948,1958,4088,4824,5176,5311,5629,5727,6659,6662,7010,9353,10220,10252,11174,23371,25959,28514,80114,84623,171023,203286	CD34,EDN1,EFNB2,EGR1,SMAD3,NKX3-1,SERPINF1,PKD2,PROX1,PTCH1,SOX4,SOX9,TEK,SLIT2,GDF11,SPRY1,ADAMTS6,TNS2,KANK2,DLL1,BICC1,KIRREL3,ASXL1,ANKS6	24/303
8_Member	GO Biological Processes	GO:0072001	renal system development	-4.1349	-1.96897	947,1906,1948,1958,4088,4824,5176,5311,5629,5727,6659,6662,7010,9353,10220,10252,11174,23371,25959,28514,80114,84623,171023,203286	CD34,EDN1,EFNB2,EGR1,SMAD3,NKX3-1,SERPINF1,PKD2,PROX1,PTCH1,SOX4,SOX9,TEK,SLIT2,GDF11,SPRY1,ADAMTS6,TNS2,KANK2,DLL1,BICC1,KIRREL3,ASXL1,ANKS6	24/313
8_Member	GO Biological Processes	GO:0048729	tissue morphogenesis	-3.3876	-1.47856	326,388,1436,1906,1948,2626,3624,4041,4088,4193,4824,4855,5311,5629,5727,6497,6662,6886,7048,7168,7414,9353,10252,10395,10630,23135,23275,23414,27152,27245,27443,28514,30008,55036	AIRE,RHOB,CSF1R,EDN1,EFNB2,GATA4,INHBA,LRP5,SMAD3,MDM2,NKX3-1,NOTCH4,PKD2,PROX1,PTCH1,SKI,SOX9,TAL1,TGFBR2,TPM1,VCL,SLIT2,SPRY1,DLC1,PDPN,KDM6B,POFUT2,ZFPM2,INTU,AHDC1,CECR2,DLL1,EFEMP2,CCDC40	34/572
8_Member	GO Biological Processes	GO:0072073	kidney epithelium development	-3.26278	-1.40501	947,1906,1948,4088,5311,5727,6662,9353,10220,10252,25959,28514,171023	CD34,EDN1,EFNB2,SMAD3,PKD2,PTCH1,SOX9,SLIT2,GDF11,SPRY1,KANK2,DLL1,ASXL1	13/140
8_Member	GO Biological Processes	GO:0060562	epithelial tube morphogenesis	-2.91994	-1.18294	388,1436,1906,1948,2626,4041,4088,4824,4855,5311,5629,5727,6497,6662,7048,9353,10252,10395,27443,28514,55036	RHOB,CSF1R,EDN1,EFNB2,GATA4,LRP5,SMAD3,NKX3-1,NOTCH4,PKD2,PROX1,PTCH1,SKI,SOX9,TGFBR2,SLIT2,SPRY1,DLC1,CECR2,DLL1,CCDC40	21/314
8_Member	GO Biological Processes	GO:0009792	embryo development ending in birth or egg hatching	-2.75729	-1.08724	320,321,1026,1906,4040,4088,4824,5311,5335,5362,5629,5727,6497,6662,7048,8314,9775,10365,10395,10658,23326,23414,23509,26469,27152,27443,28514,50861,51339,64359,79147,79893,81031,84541,154796,203286	APBA1,APBA2,CDKN1A,EDN1,LRP6,SMAD3,NKX3-1,PKD2,PLCG1,PLXNA2,PROX1,PTCH1,SKI,SOX9,TGFBR2,BAP1,EIF4A3,KLF2,DLC1,CELF1,USP22,ZFPM2,POFUT1,PTPN18,INTU,CECR2,DLL1,STMN3,DACT1,NXN,FKRP,GGNBP2,SLC2A10,KBTBD8,AMOT,ANKS6	36/671
8_Member	GO Biological Processes	GO:0043009	chordate embryonic development	-2.46349	-0.902495	320,321,1026,1906,4040,4088,4824,5311,5335,5362,5629,5727,6497,6662,7048,8314,9775,10365,10395,23414,23509,26469,27152,27443,28514,50861,51339,64359,79147,79893,81031,84541,154796,203286	APBA1,APBA2,CDKN1A,EDN1,LRP6,SMAD3,NKX3-1,PKD2,PLCG1,PLXNA2,PROX1,PTCH1,SKI,SOX9,TGFBR2,BAP1,EIF4A3,KLF2,DLC1,ZFPM2,POFUT1,PTPN18,INTU,CECR2,DLL1,STMN3,DACT1,NXN,FKRP,GGNBP2,SLC2A10,KBTBD8,AMOT,ANKS6	34/650
8_Member	GO Biological Processes	GO:0002009	morphogenesis of an epithelium	-2.17708	-0.720923	326,388,1436,1906,1948,2626,4041,4088,4824,4855,5311,5629,5727,6497,6662,7048,7414,9353,10252,10395,10630,27152,27443,28514,55036	AIRE,RHOB,CSF1R,EDN1,EFNB2,GATA4,LRP5,SMAD3,NKX3-1,NOTCH4,PKD2,PROX1,PTCH1,SKI,SOX9,TGFBR2,VCL,SLIT2,SPRY1,DLC1,PDPN,INTU,CECR2,DLL1,CCDC40	25/458
8_Member	GO Biological Processes	GO:0007389	pattern specification process	-2.16561	-0.716079	1906,2626,4040,4041,4088,4211,4213,4681,4824,5311,5362,5727,5991,6497,7048,9289,10220,23509,27152,28514,55036,55502,79365,80114,203286	EDN1,GATA4,LRP6,LRP5,SMAD3,MEIS1,MEIS3P1,NBL1,NKX3-1,PKD2,PLXNA2,PTCH1,RFX3,SKI,TGFBR2,ADGRG1,GDF11,POFUT1,INTU,DLL1,CCDC40,HES6,BHLHE41,BICC1,ANKS6	25/459
8_Member	GO Biological Processes	GO:0003002	regionalization	-2.15754	-0.709716	1906,2626,4040,4041,4088,4681,4824,5311,5362,5727,5991,6497,7048,9289,10220,23509,27152,28514,55036,55502,79365,80114,203286	EDN1,GATA4,LRP6,LRP5,SMAD3,NBL1,NKX3-1,PKD2,PLXNA2,PTCH1,RFX3,SKI,TGFBR2,ADGRG1,GDF11,POFUT1,INTU,DLL1,CCDC40,HES6,BHLHE41,BICC1,ANKS6	23/412
9_Member	GO Biological Processes	GO:0072659	protein localization to plasma membrane	-7.99275	-4.90311	88,208,2319,2580,4040,4301,5727,6653,6844,8394,9545,9693,10098,10267,23043,23241,25945,51304,54997,57154,57799,65267,81619,116372,353116	ACTN2,AKT2,FLOT2,GAK,LRP6,AFDN,PTCH1,SORL1,VAMP2,PIP5K1A,RAB3D,RAPGEF2,TSPAN5,RAMP1,TNIK,PACS2,NECTIN3,ZDHHC3,TESC,SMURF1,RAB40C,WNK3,TSPAN14,LYPD1,RILPL1	25/205
9_Member	GO Biological Processes	GO:1990778	protein localization to cell periphery	-7.59081	-4.52996	88,208,2319,2580,4040,4301,5727,6653,6844,8394,9179,9545,9693,10098,10267,22883,23043,23241,25945,51304,54997,57154,57799,65267,81619,116372,353116	ACTN2,AKT2,FLOT2,GAK,LRP6,AFDN,PTCH1,SORL1,VAMP2,PIP5K1A,AP4M1,RAB3D,RAPGEF2,TSPAN5,RAMP1,CLSTN1,TNIK,PACS2,NECTIN3,ZDHHC3,TESC,SMURF1,RAB40C,WNK3,TSPAN14,LYPD1,RILPL1	27/246
9_Member	GO Biological Processes	GO:0072657	protein localization to membrane	-4.56579	-2.28882	88,208,1740,2319,2580,4040,4301,5727,5830,6653,6844,7074,8394,9179,9545,9693,9777,10098,10267,22883,23043,23241,23787,25945,51304,54997,57154,57799,65267,79720,81619,116372,353116	ACTN2,AKT2,DLG2,FLOT2,GAK,LRP6,AFDN,PTCH1,PEX5,SORL1,VAMP2,TIAM1,PIP5K1A,AP4M1,RAB3D,RAPGEF2,TM9SF4,TSPAN5,RAMP1,CLSTN1,TNIK,PACS2,MTCH1,NECTIN3,ZDHHC3,TESC,SMURF1,RAB40C,WNK3,VPS37B,TSPAN14,LYPD1,RILPL1	33/475
9_Member	GO Biological Processes	GO:0051668	localization within membrane	-3.8939	-1.81617	88,208,738,1740,2319,2580,4040,4301,5727,5830,6653,6844,7074,8394,9179,9545,9693,9777,10098,10267,22883,23043,23241,23787,25945,51304,54997,57154,57799,65267,79720,79778,81619,116372,353116	ACTN2,AKT2,VPS51,DLG2,FLOT2,GAK,LRP6,AFDN,PTCH1,PEX5,SORL1,VAMP2,TIAM1,PIP5K1A,AP4M1,RAB3D,RAPGEF2,TM9SF4,TSPAN5,RAMP1,CLSTN1,TNIK,PACS2,MTCH1,NECTIN3,ZDHHC3,TESC,SMURF1,RAB40C,WNK3,VPS37B,MICALL2,TSPAN14,LYPD1,RILPL1	35/559
10_Member	GO Biological Processes	GO:0043087	regulation of GTPase activity	-7.49661	-4.47393	29,153,2149,2245,2889,5362,5747,6367,6376,7074,7410,8394,8412,9448,9639,9693,10235,10276,23380,26086,50861,55103,55558,57139,57572,85360,125058,129049,221472,255426	ABR,ADRB1,F2R,FGD1,RAPGEF1,PLXNA2,PTK2,CCL22,CX3CL1,TIAM1,VAV2,PIP5K1A,BCAR3,MAP4K4,ARHGEF10,RAPGEF2,RASGRP2,NET1,SRGAP2,GPSM1,STMN3,RALGPS2,PLXNA3,RGL3,DOCK6,SYDE1,TBC1D16,SGSM1,FGD2,RASGEF1C	30/298
10_Member	GO Biological Processes	GO:0007264	small GTPase-mediated signal transduction	-6.56123	-3.7082	29,388,1026,1029,1795,1796,2889,6242,7074,7410,8412,9289,9693,9743,10163,10235,10630,10787,54453,55103,57139,57572,57698,79574,116442,255426	ABR,RHOB,CDKN1A,CDKN2A,DOCK3,DOK1,RAPGEF1,RTKN,TIAM1,VAV2,BCAR3,ADGRG1,RAPGEF2,ARHGAP32,WASF2,RASGRP2,PDPN,NCKAP1,RIN2,RALGPS2,RGL3,DOCK6,SHTN1,EPS8L3,RAB39B,RASGEF1C	26/259
10_Member	GO Biological Processes	GO:0051336	regulation of hydrolase activity	-5.42784	-2.86109	29,153,274,344,1365,2149,2245,2889,4088,4824,5176,5362,5747,5894,6195,6272,6367,6376,6622,7074,7410,8394,8412,8434,9448,9639,9693,9701,10235,10276,10395,23380,23411,23787,26086,50861,55011,55103,55558,57139,57572,64115,85360,114548,125058,129049,221472,255426	ABR,ADRB1,BIN1,APOC2,CLDN3,F2R,FGD1,RAPGEF1,SMAD3,NKX3-1,SERPINF1,PLXNA2,PTK2,RAF1,RPS6KA1,SORT1,CCL22,CX3CL1,SNCA,TIAM1,VAV2,PIP5K1A,BCAR3,RECK,MAP4K4,ARHGEF10,RAPGEF2,PPP6R2,RASGRP2,NET1,DLC1,SRGAP2,SIRT1,MTCH1,GPSM1,STMN3,PIH1D1,RALGPS2,PLXNA3,RGL3,DOCK6,VSIR,SYDE1,NLRP3,TBC1D16,SGSM1,FGD2,RASGEF1C	48/746
10_Member	GO Biological Processes	GO:0043547	positive regulation of GTPase activity	-5.30877	-2.80502	29,153,2149,2889,6367,6376,7074,8394,8412,9448,9639,9693,10235,10276,23380,55103,57139,57572,85360,125058,129049,255426	ABR,ADRB1,F2R,RAPGEF1,CCL22,CX3CL1,TIAM1,PIP5K1A,BCAR3,MAP4K4,ARHGEF10,RAPGEF2,RASGRP2,NET1,SRGAP2,RALGPS2,RGL3,DOCK6,SYDE1,TBC1D16,SGSM1,RASGEF1C	22/230
10_Member	GO Biological Processes	GO:0051345	positive regulation of hydrolase activity	-4.07353	-1.93545	29,153,344,1365,2149,2889,4088,4824,6367,6376,6622,7074,8394,8412,9448,9639,9693,10235,10276,10395,23380,23411,23787,55103,57139,57572,64115,85360,114548,125058,129049,255426	ABR,ADRB1,APOC2,CLDN3,F2R,RAPGEF1,SMAD3,NKX3-1,CCL22,CX3CL1,SNCA,TIAM1,PIP5K1A,BCAR3,MAP4K4,ARHGEF10,RAPGEF2,RASGRP2,NET1,DLC1,SRGAP2,SIRT1,MTCH1,RALGPS2,RGL3,DOCK6,VSIR,SYDE1,NLRP3,TBC1D16,SGSM1,RASGEF1C	32/482
10_Member	GO Biological Processes	GO:0007265	Ras protein signal transduction	-3.56554	-1.57857	1026,1029,1796,2889,9693,10235,55103,57139,57698,255426	CDKN1A,CDKN2A,DOK1,RAPGEF1,RAPGEF2,RASGRP2,RALGPS2,RGL3,SHTN1,RASGEF1C	10/82
11_Member	WikiPathways	WP3929	Chemokine signaling pathway	-7.09849	-4.09601	208,2788,5568,5747,5894,6367,6376,6464,6777,7074,7410,9564,10000,10235,53358	AKT2,GNG7,PRKACG,PTK2,RAF1,CCL22,CX3CL1,SHC1,STAT5B,TIAM1,VAV2,BCAR1,AKT3,RASGRP2,SHC3	15/166
11_Member	Canonical Pathways	M7955	SIG INSULIN RECEPTOR PATHWAY IN CARDIAC MYOCYTES	-6.32624	-3.51985	208,1029,2308,2319,5894,6195,6196,6464,8660,9265,10000	AKT2,CDKN2A,FOXO1,FLOT2,RAF1,RPS6KA1,RPS6KA2,SHC1,IRS2,CYTH3,AKT3	11/51
11_Member	WikiPathways	WP673	ErbB signaling pathway	-6.02626	-3.30461	208,816,1026,2308,4193,5601,5602,5747,5894,6464,6777,8440,10000,53358	AKT2,CAMK2B,CDKN1A,FOXO1,MDM2,MAPK9,MAPK10,PTK2,RAF1,SHC1,STAT5B,NCK2,AKT3,SHC3	14/90
11_Member	KEGG Pathway	hsa04722	Neurotrophin signaling pathway	-5.91563	-3.2042	208,816,2889,3656,4145,5335,5601,5602,5894,6195,6196,6272,6464,10000,11213,53358	AKT2,CAMK2B,RAPGEF1,IRAK2,MATK,PLCG1,MAPK9,MAPK10,RAF1,RPS6KA1,RPS6KA2,SORT1,SHC1,AKT3,IRAK3,SHC3	16/119
11_Member	KEGG Pathway	hsa04012	ErbB signaling pathway	-5.55483	-2.9342	208,816,1026,5335,5601,5602,5747,5894,6464,6777,8440,10000,53358	AKT2,CAMK2B,CDKN1A,PLCG1,MAPK9,MAPK10,PTK2,RAF1,SHC1,STAT5B,NCK2,AKT3,SHC3	13/85
11_Member	Canonical Pathways	M1315	SIG PIP3 SIGNALING IN B LYMPHOCYTES	-4.85647	-2.48378	208,695,1029,2319,6195,6196,9265,10000	AKT2,BTK,CDKN2A,FLOT2,RPS6KA1,RPS6KA2,CYTH3,AKT3	8/36
11_Member	WikiPathways	WP481	Insulin signaling	-4.83297	-2.47034	208,1958,2308,2319,2889,3480,5601,5602,5894,6195,6196,6464,6844,8660,9265,9448,53358	AKT2,EGR1,FOXO1,FLOT2,RAPGEF1,IGF1R,MAPK9,MAPK10,RAF1,RPS6KA1,RPS6KA2,SHC1,VAMP2,IRS2,CYTH3,MAP4K4,SHC3	17/160
11_Member	WikiPathways	WP3915	Angiopoietin like protein 8 regulatory pathway	-4.68193	-2.37506	208,2308,2319,2889,5601,5602,5894,6195,6196,6464,8660,9448,51422,53358,55908	AKT2,FOXO1,FLOT2,RAPGEF1,MAPK9,MAPK10,RAF1,RPS6KA1,RPS6KA2,SHC1,IRS2,MAP4K4,PRKAG2,SHC3,ANGPTL8	15/132
11_Member	KEGG Pathway	hsa04510	Focal adhesion	-4.56978	-2.28882	208,894,1298,2889,3480,5601,5602,5747,5894,6464,7410,7414,8394,8395,9564,10000,10398,53358,83660	AKT2,CCND2,COL9A2,RAPGEF1,IGF1R,MAPK9,MAPK10,PTK2,RAF1,SHC1,VAV2,VCL,PIP5K1A,PIP5K1B,BCAR1,AKT3,MYL9,SHC3,TLN2	19/202
11_Member	KEGG Pathway	hsa04935	Growth hormone synthesis, secretion and action	-4.53903	-2.26601	208,3486,5335,5568,5601,5602,5747,5894,6464,6777,8660,9564,10000,53358	AKT2,IGFBP3,PLCG1,PRKACG,MAPK9,MAPK10,PTK2,RAF1,SHC1,STAT5B,IRS2,BCAR1,AKT3,SHC3	14/120
11_Member	KEGG Pathway	hsa04910	Insulin signaling pathway	-4.48994	-2.23296	208,2308,2319,2889,5140,5255,5568,5601,5602,5894,6464,8660,10000,51422,53358	AKT2,FOXO1,FLOT2,RAPGEF1,PDE3B,PHKA1,PRKACG,MAPK9,MAPK10,RAF1,SHC1,IRS2,AKT3,PRKAG2,SHC3	15/137
11_Member	KEGG Pathway	hsa04931	Insulin resistance	-4.40131	-2.16667	208,2308,5601,5602,6195,6196,8660,10000,10724,11000,22877,51422,200186	AKT2,FOXO1,MAPK9,MAPK10,RPS6KA1,RPS6KA2,IRS2,AKT3,OGA,SLC27A3,MLXIP,PRKAG2,CRTC2	13/108
11_Member	WikiPathways	WP4223	Ras signaling	-4.0575	-1.93008	208,1436,2788,3480,4301,5335,5568,5601,5602,5894,6464,7010,7074,10000,10235,22821,53358	AKT2,CSF1R,GNG7,IGF1R,AFDN,PLCG1,PRKACG,MAPK9,MAPK10,RAF1,SHC1,TEK,TIAM1,AKT3,RASGRP2,RASA3,SHC3	17/184
11_Member	Canonical Pathways	M295	SIG PIP3 SIGNALING IN CARDIAC MYOCTES	-3.58183	-1.59295	208,1029,5747,6195,6196,6464,8660,9265,10000	AKT2,CDKN2A,PTK2,RPS6KA1,RPS6KA2,SHC1,IRS2,CYTH3,AKT3	9/67
11_Member	KEGG Pathway	hsa01522	Endocrine resistance	-3.54604	-1.56662	208,1026,1029,3480,4193,4855,5568,5601,5602,5747,5894,6464,8647,10000,28514,53358	AKT2,CDKN1A,CDKN2A,IGF1R,MDM2,NOTCH4,PRKACG,MAPK9,MAPK10,PTK2,RAF1,SHC1,ABCB11,AKT3,DLL1,SHC3	16/98
11_Member	KEGG Pathway	hsa04917	Prolactin signaling pathway	-3.4365	-1.50657	208,894,5601,5602,5894,6464,6777,10000,53358	AKT2,CCND2,MAPK9,MAPK10,RAF1,SHC1,STAT5B,AKT3,SHC3	9/70
11_Member	WikiPathways	WP185	Integrin mediated cell adhesion	-3.3922	-1.47866	208,2889,5602,5747,5894,6464,7410,7414,9564,10000,53358	AKT2,RAPGEF1,MAPK10,PTK2,RAF1,SHC1,VAV2,VCL,BCAR1,AKT3,SHC3	11/102
11_Member	KEGG Pathway	hsa04914	Progesterone-mediated oocyte maturation	-3.3922	-1.47866	208,3480,4342,5140,5568,5601,5602,5894,6195,6196,10000	AKT2,IGF1R,MOS,PDE3B,PRKACG,MAPK9,MAPK10,RAF1,RPS6KA1,RPS6KA2,AKT3	11/102
11_Member	KEGG Pathway	hsa04062	Chemokine signaling pathway	-3.34606	-1.45561	208,2788,5335,5568,5747,5894,6367,6376,6464,6777,7074,7410,9564,10000,10235,53358	AKT2,GNG7,PLCG1,PRKACG,PTK2,RAF1,CCL22,CX3CL1,SHC1,STAT5B,TIAM1,VAV2,BCAR1,AKT3,RASGRP2,SHC3	16/192
11_Member	KEGG Pathway	hsa04625	C-type lectin receptor signaling pathway	-3.31948	-1.43548	208,1263,1960,4193,5532,5601,5602,5894,6367,10000,114548	AKT2,PLK3,EGR3,MDM2,PPP3CB,MAPK9,MAPK10,RAF1,CCL22,AKT3,NLRP3	11/104
11_Member	WikiPathways	WP306	Focal adhesion	-3.17615	-1.35387	208,894,2889,3480,5601,5602,5747,5894,6464,7410,7414,9564,10000,10398,53358,83660	AKT2,CCND2,RAPGEF1,IGF1R,MAPK9,MAPK10,PTK2,RAF1,SHC1,VAV2,VCL,BCAR1,AKT3,MYL9,SHC3,TLN2	16/199
11_Member	KEGG Pathway	hsa04014	Ras signaling pathway	-2.80871	-1.11314	208,1436,2788,3480,4301,5335,5568,5601,5602,5894,6464,7010,7074,10000,10235,22821,53358	AKT2,CSF1R,GNG7,IGF1R,AFDN,PLCG1,PRKACG,MAPK9,MAPK10,RAF1,SHC1,TEK,TIAM1,AKT3,RASGRP2,RASA3,SHC3	17/236
11_Member	WikiPathways	WP2643	Nanoparticle mediated activation of receptor signaling	-2.76456	-1.0899	5601,5602,5747,5894,10000	MAPK9,MAPK10,PTK2,RAF1,AKT3	5/28
11_Member	KEGG Pathway	hsa04926	Relaxin signaling pathway	-2.55276	-0.952937	208,1906,2788,5568,5601,5602,5894,6464,7048,10000,53358	AKT2,EDN1,GNG7,PRKACG,MAPK9,MAPK10,RAF1,SHC1,TGFBR2,AKT3,SHC3	11/129
11_Member	WikiPathways	WP4566	Translation inhibitors in chronically activated PDGFRA cells	-2.49218	-0.916655	208,5601,5602,6195,6196,10000	AKT2,MAPK9,MAPK10,RPS6KA1,RPS6KA2,AKT3	6/46
11_Member	WikiPathways	WP4877	Host pathogen interaction of human coronaviruses MAPK signaling	-2.27152	-0.779704	5601,5602,5894,6195,6196	MAPK9,MAPK10,RAF1,RPS6KA1,RPS6KA2	5/36
11_Member	KEGG Pathway	hsa04140	Autophagy - animal	-2.17563	-0.720699	208,3480,3916,5568,5601,5602,5894,8660,8897,10000,10652,116442	AKT2,IGF1R,LAMP1,PRKACG,MAPK9,MAPK10,RAF1,IRS2,MTMR3,AKT3,YKT6,RAB39B	12/165
12_Member	KEGG Pathway	hsa04530	Tight junction	-6.91634	-3.95165	861,1365,1740,2626,4301,5568,5601,5602,7074,7082,8777,9223,9693,10398,51422,57530,58494,79778,83700,154796,154810	RUNX1,CLDN3,DLG2,GATA4,AFDN,PRKACG,MAPK9,MAPK10,TIAM1,TJP1,MPDZ,MAGI1,RAPGEF2,MYL9,PRKAG2,CGN,JAM2,MICALL2,JAM3,AMOT,AMOTL1	21/170
13_Member	GO Biological Processes	GO:0048871	multicellular organismal-level homeostasis	-6.85916	-3.9122	21,153,154,695,947,1365,1490,1958,2055,2149,2308,3624,3707,4756,5532,5568,6653,6659,6662,6777,6839,6886,7082,7414,8314,9289,9545,9696,10000,10365,22884,23371,23411,28514,57482,58494,64072,65267,79705,83700,90987,114781,114789,124976,171023	ABCA3,ADRB1,ADRB2,BTK,CD34,CLDN3,CCN2,EGR1,CLN8,F2R,FOXO1,INHBA,ITPKB,NEO1,PPP3CB,PRKACG,SORL1,SOX4,SOX9,STAT5B,SUV39H1,TAL1,TJP1,VCL,BAP1,ADGRG1,RAB3D,CROCC,AKT3,KLF2,WDR37,TNS2,SIRT1,DLL1,CRACD,JAM2,CDH23,WNK3,LRRK1,JAM3,ZNF251,BTBD9,SLC25A25,SPNS2,ASXL1	45/603
13_Member	GO Biological Processes	GO:0001894	tissue homeostasis	-4.09168	-1.94268	154,947,1365,1490,2055,2149,6662,7082,7414,8314,9545,9696,10000,57482,58494,64072,65267,79705,83700	ADRB2,CD34,CLDN3,CCN2,CLN8,F2R,SOX9,TJP1,VCL,BAP1,RAB3D,CROCC,AKT3,CRACD,JAM2,CDH23,WNK3,LRRK1,JAM3	19/219
13_Member	GO Biological Processes	GO:0060249	anatomical structure homeostasis	-4.09168	-1.94268	154,947,1365,1490,2055,2149,6662,7082,7414,8314,9545,9696,10000,57482,58494,64072,65267,79705,83700	ADRB2,CD34,CLDN3,CCN2,CLN8,F2R,SOX9,TJP1,VCL,BAP1,RAB3D,CROCC,AKT3,CRACD,JAM2,CDH23,WNK3,LRRK1,JAM3	19/219
14_Member	GO Biological Processes	GO:0098657	import into cell	-6.79222	-3.86229	154,274,1130,1238,1453,1455,1803,2055,2580,3177,3949,4040,4041,4065,4646,4973,5747,6272,6518,6553,6560,6565,6570,6622,6653,6844,7410,7525,8394,9154,9266,9372,9777,10163,10267,10894,10947,28514,53353,54453,54795,55716,66000,79874,81031,85021,92737,120103,126432,374868	ADRB2,BIN1,LYST,ACKR2,CSNK1D,CSNK1G2,DPP4,CLN8,GAK,SLC29A2,LDLR,LRP6,LRP5,LY75,MYO6,OLR1,PTK2,SORT1,SLC2A5,SLC9A5,SLC12A4,SLC15A2,SLC18A1,SNCA,SORL1,VAMP2,VAV2,YES1,PIP5K1A,SLC28A1,CYTH2,ZFYVE9,TM9SF4,WASF2,RAMP1,LYVE1,AP3M2,DLL1,LRP1B,RIN2,TRPM4,LMBR1L,TMEM108,RABEP2,SLC2A10,REPS1,DNER,SLC36A4,RINL,ATP9B	50/709
14_Member	GO Biological Processes	GO:0006897	endocytosis	-6.04086	-3.30874	154,274,1130,1238,1453,1455,1803,2580,3949,4040,4041,4065,4646,4973,5747,6272,6622,6653,6844,7410,7525,8394,9266,9372,9777,10163,10267,10894,10947,28514,53353,54453,55716,66000,79874,85021,92737,126432,374868	ADRB2,BIN1,LYST,ACKR2,CSNK1D,CSNK1G2,DPP4,GAK,LDLR,LRP6,LRP5,LY75,MYO6,OLR1,PTK2,SORT1,SNCA,SORL1,VAMP2,VAV2,YES1,PIP5K1A,CYTH2,ZFYVE9,TM9SF4,WASF2,RAMP1,LYVE1,AP3M2,DLL1,LRP1B,RIN2,LMBR1L,TMEM108,RABEP2,REPS1,DNER,RINL,ATP9B	39/522
14_Member	GO Biological Processes	GO:0006898	receptor-mediated endocytosis	-2.65618	-1.02055	154,1803,2580,3949,4040,6622,6653,10267,10894,28514,53353,55716,66000	ADRB2,DPP4,GAK,LDLR,LRP6,SNCA,SORL1,RAMP1,LYVE1,DLL1,LRP1B,LMBR1L,TMEM108	13/163
15_Member	KEGG Pathway	hsa04068	FoxO signaling pathway	-6.71935	-3.82161	208,894,1026,1263,2308,3480,4088,4193,5601,5602,5894,7048,8660,9456,10000,10365,23411,51422	AKT2,CCND2,CDKN1A,PLK3,FOXO1,IGF1R,SMAD3,MDM2,MAPK9,MAPK10,RAF1,TGFBR2,IRS2,HOMER1,AKT3,KLF2,SIRT1,PRKAG2	18/131
15_Member	KEGG Pathway	hsa05220	Chronic myeloid leukemia	-6.12498	-3.34828	208,861,1021,1026,1029,4088,4193,5894,6464,6777,7048,10000,53358	AKT2,RUNX1,CDK6,CDKN1A,CDKN2A,SMAD3,MDM2,RAF1,SHC1,STAT5B,TGFBR2,AKT3,SHC3	13/76
15_Member	KEGG Pathway	hsa05225	Hepatocellular carcinoma	-5.73127	-3.05465	208,1021,1026,1029,2941,2946,2947,2948,3480,4040,4041,4088,5335,5894,6464,7048,10000,10023,53358	AKT2,CDK6,CDKN1A,CDKN2A,GSTA4,GSTM2,GSTM3,GSTM4,IGF1R,LRP6,LRP5,SMAD3,PLCG1,RAF1,SHC1,TGFBR2,AKT3,FRAT1,SHC3	19/168
15_Member	KEGG Pathway	hsa05214	Glioma	-5.38428	-2.84556	208,816,1021,1026,1029,3480,4193,5335,5894,6464,10000,53358	AKT2,CAMK2B,CDK6,CDKN1A,CDKN2A,IGF1R,MDM2,PLCG1,RAF1,SHC1,AKT3,SHC3	12/75
15_Member	WikiPathways	WP2261	Glioblastoma signaling pathways	-4.2472	-2.04531	208,894,1021,1026,1029,2308,3480,4193,5335,5894,10000	AKT2,CCND2,CDK6,CDKN1A,CDKN2A,FOXO1,IGF1R,MDM2,PLCG1,RAF1,AKT3	11/82
15_Member	WikiPathways	WP5358	JAK STAT signaling in the regulation of beta cells	-4.08834	-1.9421	208,894,2057,3459,3570,6777,10000	AKT2,CCND2,EPOR,IFNGR1,IL6R,STAT5B,AKT3	7/34
15_Member	Reactome Gene Sets	R-HSA-5674400	Constitutive Signaling by AKT1 E17K in Cancer	-3.96948	-1.86513	208,1026,2308,3164,4193,10000	AKT2,CDKN1A,FOXO1,NR4A1,MDM2,AKT3	6/25
15_Member	Reactome Gene Sets	R-HSA-198693	AKT phosphorylates targets in the nucleus	-3.94832	-1.84645	208,2308,3164,10000	AKT2,FOXO1,NR4A1,AKT3	4/9
15_Member	WikiPathways	WP4263	Pancreatic adenocarcinoma pathway	-3.91838	-1.82145	208,1021,1026,1029,4088,5601,5602,5894,7048,7074,10000	AKT2,CDK6,CDKN1A,CDKN2A,SMAD3,MAPK9,MAPK10,RAF1,TGFBR2,TIAM1,AKT3	11/89
15_Member	Reactome Gene Sets	R-HSA-211163	AKT-mediated inactivation of FOXO1A	-3.90255	-1.8201	208,2308,10000	AKT2,FOXO1,AKT3	3/4
15_Member	KEGG Pathway	hsa04218	Cellular senescence	-3.84246	-1.78717	208,894,1021,1026,1029,2308,2626,3486,4088,4193,5532,5894,7048,10000,23411	AKT2,CCND2,CDK6,CDKN1A,CDKN2A,FOXO1,GATA4,IGFBP3,SMAD3,MDM2,PPP3CB,RAF1,TGFBR2,AKT3,SIRT1	15/156
15_Member	KEGG Pathway	hsa05212	Pancreatic cancer	-3.8417	-1.78717	208,1021,1026,1029,4088,5601,5602,5894,7048,10000	AKT2,CDK6,CDKN1A,CDKN2A,SMAD3,MAPK9,MAPK10,RAF1,TGFBR2,AKT3	10/76
15_Member	WikiPathways	WP710	DNA damage response only ATM dependent	-3.65877	-1.65233	208,894,1026,1029,3949,4088,4193,5601,5602,6464,10000,10023	AKT2,CCND2,CDKN1A,CDKN2A,LDLR,SMAD3,MDM2,MAPK9,MAPK10,SHC1,AKT3,FRAT1	12/111
15_Member	WikiPathways	WP4255	Non small cell lung cancer	-3.34415	-1.45561	208,1021,1026,1029,5335,5894,6777,10000,27436	AKT2,CDK6,CDKN1A,CDKN2A,PLCG1,RAF1,STAT5B,AKT3,EML4	9/72
15_Member	KEGG Pathway	hsa05223	Non-small cell lung cancer	-3.34415	-1.45561	208,1021,1026,1029,5335,5894,6777,10000,27436	AKT2,CDK6,CDKN1A,CDKN2A,PLCG1,RAF1,STAT5B,AKT3,EML4	9/72
15_Member	Canonical Pathways	M8626	SIG BCR SIGNALING PATHWAY	-3.23433	-1.38726	208,695,2319,5532,5894,6464,10000	AKT2,BTK,FLOT2,PPP3CB,RAF1,SHC1,AKT3	7/46
15_Member	WikiPathways	WP4239	Epithelial to mesenchymal transition in colorectal cancer	-3.15493	-1.34022	208,1365,4040,4041,4088,4855,5629,5894,6464,7048,7082,8726,10000,28514	AKT2,CLDN3,LRP6,LRP5,SMAD3,NOTCH4,PROX1,RAF1,SHC1,TGFBR2,TJP1,EED,AKT3,DLL1	14/162
15_Member	Reactome Gene Sets	R-HSA-198323	AKT phosphorylates targets in the cytosol	-3.10355	-1.30148	208,1026,4193,10000	AKT2,CDKN1A,MDM2,AKT3	4/14
15_Member	KEGG Pathway	hsa05224	Breast cancer	-3.063	-1.28088	208,1021,1026,3480,4040,4041,4855,5894,6464,10000,10023,28514,53358	AKT2,CDK6,CDKN1A,IGF1R,LRP6,LRP5,NOTCH4,RAF1,SHC1,AKT3,FRAT1,DLL1,SHC3	13/147
15_Member	Reactome Gene Sets	R-HSA-1227986	Signaling by ERBB2	-3.01112	-1.2414	208,4145,5335,6464,7525,10000,26469	AKT2,MATK,PLCG1,SHC1,YES1,AKT3,PTPN18	7/50
15_Member	WikiPathways	WP5385	Growth factors and hormones in beta cell proliferation	-2.91612	-1.18294	208,2308,3480,10000,200186	AKT2,FOXO1,IGF1R,AKT3,CRTC2	5/26
15_Member	WikiPathways	WP4685	Melanoma	-2.8573	-1.14282	208,1021,1026,1029,4193,5894,7414,10000	AKT2,CDK6,CDKN1A,CDKN2A,MDM2,RAF1,VCL,AKT3	8/68
15_Member	WikiPathways	WP4262	Breast cancer pathway	-2.85152	-1.14009	208,1021,1026,3480,4040,4041,4855,5894,6464,10000,10023,28514,53358	AKT2,CDK6,CDKN1A,IGF1R,LRP6,LRP5,NOTCH4,RAF1,SHC1,AKT3,FRAT1,DLL1,SHC3	13/155
15_Member	Canonical Pathways	M1718	SIG IL4RECEPTOR IN B LYPHOCYTES	-2.83859	-1.13118	208,5894,6464,8660,10000	AKT2,RAF1,SHC1,IRS2,AKT3	5/27
15_Member	Canonical Pathways	M12771	SA PTEN PATHWAY	-2.76044	-1.08948	208,6464,10000,26034	AKT2,SHC1,AKT3,IPCEF1	4/17
15_Member	Canonical Pathways	M18895	SA TRKA RECEPTOR	-2.76044	-1.08948	208,1026,6464,10000	AKT2,CDKN1A,SHC1,AKT3	4/17
15_Member	KEGG Pathway	hsa05218	Melanoma	-2.69621	-1.04609	208,1021,1026,1029,3480,4193,5894,10000	AKT2,CDK6,CDKN1A,CDKN2A,IGF1R,MDM2,RAF1,AKT3	8/72
15_Member	KEGG Pathway	hsa05166	Human T-cell leukemia virus 1 infection	-2.67927	-1.03601	208,894,1026,1029,1958,4088,5532,5568,5601,5602,6777,7048,10000,83660,115650,200186	AKT2,CCND2,CDKN1A,CDKN2A,EGR1,SMAD3,PPP3CB,PRKACG,MAPK9,MAPK10,STAT5B,TGFBR2,AKT3,TLN2,TNFRSF13C,CRTC2	16/222
15_Member	Canonical Pathways	M100	PID SHP2 PATHWAY	-2.67165	-1.03004	3459,3480,3570,4301,5894,6464,7010	IFNGR1,IGF1R,IL6R,AFDN,RAF1,SHC1,TEK	7/57
15_Member	WikiPathways	WP4216	Chromosomal and microsatellite instability in colorectal cancer	-2.65784	-1.02135	208,1026,4088,5601,5602,5894,7048,10000	AKT2,CDKN1A,SMAD3,MAPK9,MAPK10,RAF1,TGFBR2,AKT3	8/73
15_Member	KEGG Pathway	hsa04066	HIF-1 signaling pathway	-2.6282	-1.00451	208,816,1026,1906,3459,3480,3570,5335,7010,10000	AKT2,CAMK2B,CDKN1A,EDN1,IFNGR1,IGF1R,IL6R,PLCG1,TEK,AKT3	10/108
15_Member	Reactome Gene Sets	R-HSA-6804758	Regulation of TP53 Activity through Acetylation	-2.62596	-1.00451	208,8396,10000,57459,84289	AKT2,PIP4K2B,AKT3,GATAD2B,ING5	5/30
15_Member	KEGG Pathway	hsa04630	JAK-STAT signaling pathway	-2.58675	-0.974574	208,894,1026,2057,3459,3570,3597,5008,5894,6777,10000,10401,338376	AKT2,CCND2,CDKN1A,EPOR,IFNGR1,IL6R,IL13RA1,OSM,RAF1,STAT5B,AKT3,PIAS3,IFNE	13/166
15_Member	WikiPathways	WP3981	miRNA regulation of prostate cancer signaling pathways	-2.56094	-0.960327	1026,2308,4193,5894,10000	CDKN1A,FOXO1,MDM2,RAF1,AKT3	5/31
15_Member	KEGG Pathway	hsa01521	EGFR tyrosine kinase inhibitor resistance	-2.44195	-0.888179	208,3480,3570,5335,5894,6464,10000,53358	AKT2,IGF1R,IL6R,PLCG1,RAF1,SHC1,AKT3,SHC3	8/79
15_Member	KEGG Pathway	hsa05215	Prostate cancer	-2.42379	-0.876155	208,1026,2308,3480,4193,4824,5327,5894,10000	AKT2,CDKN1A,FOXO1,IGF1R,MDM2,NKX3-1,PLAT,RAF1,AKT3	9/97
15_Member	Reactome Gene Sets	R-HSA-389513	CTLA4 inhibitory signaling	-2.40381	-0.863896	208,1493,7525,10000	AKT2,CTLA4,YES1,AKT3	4/21
15_Member	Reactome Gene Sets	R-HSA-9614399	Regulation of localization of FOXO transcription factors	-2.3598	-0.834406	208,2308,10000	AKT2,FOXO1,AKT3	3/11
15_Member	Canonical Pathways	M249	PID PI3KCI AKT PATHWAY	-2.32514	-0.814022	208,1026,2308,5894,10000	AKT2,CDKN1A,FOXO1,RAF1,AKT3	5/35
15_Member	Reactome Gene Sets	R-HSA-5633007	Regulation of TP53 Activity	-2.27986	-0.780067	208,1029,1263,4193,6878,6882,8396,9099,10000,51422,57459,84289	AKT2,CDKN2A,PLK3,MDM2,TAF6,TAF11,PIP4K2B,USP2,AKT3,PRKAG2,GATAD2B,ING5	12/160
15_Member	WikiPathways	WP4806	EGFR tyrosine kinase inhibitor resistance	-2.27888	-0.780067	208,3480,3570,5335,5894,6464,10000,53358	AKT2,IGF1R,IL6R,PLCG1,RAF1,SHC1,AKT3,SHC3	8/84
15_Member	Reactome Gene Sets	R-HSA-6804757	Regulation of TP53 Degradation	-2.27152	-0.779704	208,1029,4193,9099,10000	AKT2,CDKN2A,MDM2,USP2,AKT3	5/36
15_Member	KEGG Pathway	hsa05163	Human cytomegalovirus infection	-2.23389	-0.758217	208,1021,1026,1029,2788,3570,4193,5532,5568,5747,5894,6376,7188,9564,10000	AKT2,CDK6,CDKN1A,CDKN2A,GNG7,IL6R,MDM2,PPP3CB,PRKACG,PTK2,RAF1,CX3CL1,TRAF5,BCAR1,AKT3	15/225
15_Member	Reactome Gene Sets	R-HSA-6806003	Regulation of TP53 Expression and Degradation	-2.21977	-0.751665	208,1029,4193,9099,10000	AKT2,CDKN2A,MDM2,USP2,AKT3	5/37
15_Member	KEGG Pathway	hsa05210	Colorectal cancer	-2.21748	-0.750522	208,1026,4088,5601,5602,5894,7048,10000	AKT2,CDKN1A,SMAD3,MAPK9,MAPK10,RAF1,TGFBR2,AKT3	8/86
15_Member	KEGG Pathway	hsa05226	Gastric cancer	-2.0841	-0.658799	208,1026,4040,4041,4088,5894,6464,7048,10000,10023,53358	AKT2,CDKN1A,LRP6,LRP5,SMAD3,RAF1,SHC1,TGFBR2,AKT3,FRAT1,SHC3	11/149
15_Member	WikiPathways	WP4674	Head and neck squamous cell carcinoma	-2.03956	-0.632674	208,1021,1026,1029,3480,7048,10000	AKT2,CDK6,CDKN1A,CDKN2A,IGF1R,TGFBR2,AKT3	7/74
16_Member	KEGG Pathway	hsa04024	cAMP signaling pathway	-6.58966	-3.72188	153,154,208,268,487,816,1259,1906,2149,4301,5140,5568,5601,5602,5727,5894,6662,7074,7410,8310,10000,10257,10398,56670	ADRB1,ADRB2,AKT2,AMH,ATP2A1,CAMK2B,CNGA1,EDN1,F2R,AFDN,PDE3B,PRKACG,MAPK9,MAPK10,PTCH1,RAF1,SOX9,TIAM1,VAV2,ACOX3,AKT3,ABCC4,MYL9,SUCNR1	24/225
16_Member	KEGG Pathway	hsa04923	Regulation of lipolysis in adipocytes	-3.32259	-1.43708	153,154,208,5140,5568,8660,10000,57104	ADRB1,ADRB2,AKT2,PDE3B,PRKACG,IRS2,AKT3,PNPLA2	8/58
16_Member	KEGG Pathway	hsa04022	cGMP-PKG signaling pathway	-3.05084	-1.27178	153,154,208,487,1259,2626,2982,4882,5140,5532,5894,8660,10000,10398	ADRB1,ADRB2,AKT2,ATP2A1,CNGA1,GATA4,GUCY1A1,NPR2,PDE3B,PPP3CB,RAF1,IRS2,AKT3,MYL9	14/166
16_Member	KEGG Pathway	hsa04924	Renin secretion	-2.20289	-0.738801	153,154,1906,2982,5140,5532,5568	ADRB1,ADRB2,EDN1,GUCY1A1,PDE3B,PPP3CB,PRKACG	7/69
17_Member	KEGG Pathway	hsa04015	Rap1 signaling pathway	-6.54795	-3.7082	208,1436,2149,2889,3480,4301,5217,5335,5894,6494,7010,7074,7410,9223,9564,9693,10000,10235,23683,54518,57568,83660,260425	AKT2,CSF1R,F2R,RAPGEF1,IGF1R,AFDN,PFN2,PLCG1,RAF1,SIPA1,TEK,TIAM1,VAV2,MAGI1,BCAR1,RAPGEF2,AKT3,RASGRP2,PRKD3,APBB1IP,SIPA1L2,TLN2,MAGI3	23/210
17_Member	KEGG Pathway	hsa04611	Platelet activation	-2.68775	-1.04181	208,695,2149,2815,2982,5568,6915,10000,10235,54518,83660	AKT2,BTK,F2R,GP9,GUCY1A1,PRKACG,TBXA2R,AKT3,RASGRP2,APBB1IP,TLN2	11/124
18_Member	GO Biological Processes	GO:0051960	regulation of nervous system development	-6.35049	-3.52411	274,816,1826,3949,4204,5176,5324,5362,5629,5783,6376,6497,6653,7074,8482,9253,9353,9693,9746,10810,22883,23105,23363,26011,28514,55502,55558,57154,57463,57556,57698,58494,79365,79953,80128,222223,644943	BIN1,CAMK2B,DSCAM,LDLR,MECP2,SERPINF1,PLAG1,PLXNA2,PROX1,PTPN13,CX3CL1,SKI,SORL1,TIAM1,SEMA7A,NUMBL,SLIT2,RAPGEF2,CLSTN3,WASF3,CLSTN1,FSTL4,OBSL1,TENM4,DLL1,HES6,PLXNA3,SMURF1,AMIGO1,SEMA6A,SHTN1,JAM2,BHLHE41,SYNDIG1,TRIM46,ELAPOR2,RASSF10	37/468
18_Member	GO Biological Processes	GO:0050767	regulation of neurogenesis	-4.9731	-2.57157	274,816,1826,3949,4204,5176,5324,5362,5629,6376,6497,6653,7074,8482,9253,9353,9693,23105,23363,26011,28514,55502,55558,57154,57463,57556,57698,79365,80128,644943	BIN1,CAMK2B,DSCAM,LDLR,MECP2,SERPINF1,PLAG1,PLXNA2,PROX1,CX3CL1,SKI,SORL1,TIAM1,SEMA7A,NUMBL,SLIT2,RAPGEF2,FSTL4,OBSL1,TENM4,DLL1,HES6,PLXNA3,SMURF1,AMIGO1,SEMA6A,SHTN1,BHLHE41,TRIM46,RASSF10	30/393
18_Member	GO Biological Processes	GO:0010720	positive regulation of cell development	-4.96223	-2.57157	118,274,695,816,861,1826,1960,3707,4204,5176,5324,5362,5991,6376,6659,6777,7048,7074,8482,9253,9353,9760,23363,26011,54997,55558,57154,57463,57698,64115,84807,114548,644943	ADD1,BIN1,BTK,CAMK2B,RUNX1,DSCAM,EGR3,ITPKB,MECP2,SERPINF1,PLAG1,PLXNA2,RFX3,CX3CL1,SOX4,STAT5B,TGFBR2,TIAM1,SEMA7A,NUMBL,SLIT2,TOX,OBSL1,TENM4,TESC,PLXNA3,SMURF1,AMIGO1,SHTN1,VSIR,NFKBID,NLRP3,RASSF10	33/454
18_Member	GO Biological Processes	GO:0090066	regulation of anatomical structure size	-4.22496	-2.03	88,118,153,154,274,1826,1906,2055,2149,2982,3741,4897,5217,6560,6915,7410,8440,8482,9353,10000,10365,10787,23105,23108,25959,54795,55558,57154,57482,57556,57698,65267,80128,171023	ACTN2,ADD1,ADRB1,ADRB2,BIN1,DSCAM,EDN1,CLN8,F2R,GUCY1A1,KCNA5,NRCAM,PFN2,SLC12A4,TBXA2R,VAV2,NCK2,SEMA7A,SLIT2,AKT3,KLF2,NCKAP1,FSTL4,RAP1GAP2,KANK2,TRPM4,PLXNA3,SMURF1,CRACD,SEMA6A,SHTN1,WNK3,TRIM46,ASXL1	34/516
18_Member	GO Biological Processes	GO:0010975	regulation of neuron projection development	-4.08335	-1.93984	816,1826,1948,2011,2580,2889,3480,4193,4756,4897,5176,5362,5793,6376,7074,8482,8507,9353,9693,9760,23043,23105,23363,23413,55558,57154,57463,57556,57698,80128,81618	CAMK2B,DSCAM,EFNB2,MARK2,GAK,RAPGEF1,IGF1R,MDM2,NEO1,NRCAM,SERPINF1,PLXNA2,PTPRG,CX3CL1,TIAM1,SEMA7A,ENC1,SLIT2,RAPGEF2,TOX,TNIK,FSTL4,OBSL1,NCS1,PLXNA3,SMURF1,AMIGO1,SEMA6A,SHTN1,TRIM46,ITM2C	31/460
18_Member	GO Biological Processes	GO:0120035	regulation of plasma membrane bounded cell projection organization	-4.07051	-1.93512	816,1826,1948,2011,2580,2889,3480,4193,4756,4897,5176,5217,5362,5793,6376,7074,8482,8507,9353,9456,9693,9696,9760,10163,10630,10787,23043,23105,23363,23413,27152,55558,57154,57463,57556,57698,79574,79874,80128,81618	CAMK2B,DSCAM,EFNB2,MARK2,GAK,RAPGEF1,IGF1R,MDM2,NEO1,NRCAM,SERPINF1,PFN2,PLXNA2,PTPRG,CX3CL1,TIAM1,SEMA7A,ENC1,SLIT2,HOMER1,RAPGEF2,CROCC,TOX,WASF2,PDPN,NCKAP1,TNIK,FSTL4,OBSL1,NCS1,INTU,PLXNA3,SMURF1,AMIGO1,SEMA6A,SHTN1,EPS8L3,RABEP2,TRIM46,ITM2C	40/659
18_Member	GO Biological Processes	GO:0031344	regulation of cell projection organization	-3.83761	-1.78717	816,1826,1948,2011,2580,2889,3480,4193,4756,4897,5176,5217,5362,5793,6376,7074,8482,8507,9353,9456,9693,9696,9760,10163,10630,10787,23043,23105,23363,23413,27152,55558,57154,57463,57556,57698,79574,79874,80128,81618	CAMK2B,DSCAM,EFNB2,MARK2,GAK,RAPGEF1,IGF1R,MDM2,NEO1,NRCAM,SERPINF1,PFN2,PLXNA2,PTPRG,CX3CL1,TIAM1,SEMA7A,ENC1,SLIT2,HOMER1,RAPGEF2,CROCC,TOX,WASF2,PDPN,NCKAP1,TNIK,FSTL4,OBSL1,NCS1,INTU,PLXNA3,SMURF1,AMIGO1,SEMA6A,SHTN1,EPS8L3,RABEP2,TRIM46,ITM2C	40/676
18_Member	GO Biological Processes	GO:0051962	positive regulation of nervous system development	-3.6916	-1.67914	274,816,1826,4204,5176,5324,5362,6376,7074,8482,9253,9353,9746,22883,23363,26011,55558,57154,57463,57698,79953,644943	BIN1,CAMK2B,DSCAM,MECP2,SERPINF1,PLAG1,PLXNA2,CX3CL1,TIAM1,SEMA7A,NUMBL,SLIT2,CLSTN3,CLSTN1,OBSL1,TENM4,PLXNA3,SMURF1,AMIGO1,SHTN1,SYNDIG1,RASSF10	22/294
18_Member	GO Biological Processes	GO:0008361	regulation of cell size	-3.44756	-1.50949	1826,1906,2055,4897,6560,7410,8482,10000,23105,23108,55558,57154,57556,57698,65267,80128	DSCAM,EDN1,CLN8,NRCAM,SLC12A4,VAV2,SEMA7A,AKT3,FSTL4,RAP1GAP2,PLXNA3,SMURF1,SEMA6A,SHTN1,WNK3,TRIM46	16/188
18_Member	GO Biological Processes	GO:0050769	positive regulation of neurogenesis	-3.43998	-1.5067	274,816,1826,4204,5176,5324,5362,6376,7074,8482,9253,9353,23363,26011,55558,57154,57463,57698,644943	BIN1,CAMK2B,DSCAM,MECP2,SERPINF1,PLAG1,PLXNA2,CX3CL1,TIAM1,SEMA7A,NUMBL,SLIT2,OBSL1,TENM4,PLXNA3,SMURF1,AMIGO1,SHTN1,RASSF10	19/246
18_Member	GO Biological Processes	GO:0032535	regulation of cellular component size	-3.42858	-1.50353	88,118,274,1826,1906,2055,4897,5217,6560,7410,8440,8482,9353,10000,10787,23105,23108,25959,55558,57154,57482,57556,57698,65267,80128	ACTN2,ADD1,BIN1,DSCAM,EDN1,CLN8,NRCAM,PFN2,SLC12A4,VAV2,NCK2,SEMA7A,SLIT2,AKT3,NCKAP1,FSTL4,RAP1GAP2,KANK2,PLXNA3,SMURF1,CRACD,SEMA6A,SHTN1,WNK3,TRIM46	25/370
18_Member	GO Biological Processes	GO:0050772	positive regulation of axonogenesis	-3.08661	-1.29194	1826,5362,7074,8482,9353,55558,57154,57463,57698	DSCAM,PLXNA2,TIAM1,SEMA7A,SLIT2,PLXNA3,SMURF1,AMIGO1,SHTN1	9/78
18_Member	GO Biological Processes	GO:0031346	positive regulation of cell projection organization	-2.87754	-1.15173	816,1826,2011,2889,3480,5176,5362,6376,7074,8482,8507,9353,9693,9696,9760,10163,10787,23363,55558,57154,57463,57698,79574	CAMK2B,DSCAM,MARK2,RAPGEF1,IGF1R,SERPINF1,PLXNA2,CX3CL1,TIAM1,SEMA7A,ENC1,SLIT2,RAPGEF2,CROCC,TOX,WASF2,NCKAP1,OBSL1,PLXNA3,SMURF1,AMIGO1,SHTN1,EPS8L3	23/360
18_Member	GO Biological Processes	GO:0050770	regulation of axonogenesis	-2.82626	-1.12084	1826,2011,5362,7074,8482,9353,23105,55558,57154,57463,57556,57698,80128	DSCAM,MARK2,PLXNA2,TIAM1,SEMA7A,SLIT2,FSTL4,PLXNA3,SMURF1,AMIGO1,SEMA6A,SHTN1,TRIM46	13/156
18_Member	GO Biological Processes	GO:0061387	regulation of extent of cell growth	-2.09425	-0.666328	1826,4897,8482,23105,55558,57154,57556,57698,80128	DSCAM,NRCAM,SEMA7A,FSTL4,PLXNA3,SMURF1,SEMA6A,SHTN1,TRIM46	9/109
18_Member	GO Biological Processes	GO:0030516	regulation of axon extension	-2.04502	-0.636685	1826,4897,8482,55558,57154,57556,57698,80128	DSCAM,NRCAM,SEMA7A,PLXNA3,SMURF1,SEMA6A,SHTN1,TRIM46	8/92
18_Member	GO Biological Processes	GO:0071526	semaphorin-plexin signaling pathway	-2.02957	-0.626675	1906,5362,8482,55558,57556	EDN1,PLXNA2,SEMA7A,PLXNA3,SEMA6A	5/41
19_Member	GO Biological Processes	GO:0060322	head development	-6.32068	-3.51985	738,1021,1152,1436,1453,2057,2523,3480,3624,4040,4204,4211,4213,4897,5362,5629,5727,5830,5894,6497,6659,6662,7048,8482,8660,9253,9289,9353,9693,9760,10000,10395,22884,23030,23135,23353,23380,28514,54510,55558,55624,57463,64651,65109,66000,79147,79934,83696,84623,93986,140733,166614	VPS51,CDK6,CKB,CSF1R,CSNK1D,EPOR,FUT1,IGF1R,INHBA,LRP6,MECP2,MEIS1,MEIS3P1,NRCAM,PLXNA2,PROX1,PTCH1,PEX5,RAF1,SKI,SOX4,SOX9,TGFBR2,SEMA7A,IRS2,NUMBL,ADGRG1,SLIT2,RAPGEF2,TOX,AKT3,DLC1,WDR37,KDM4B,KDM6B,SUN1,SRGAP2,DLL1,PCDH18,PLXNA3,POMGNT1,AMIGO1,CSRNP1,UPF3B,TMEM108,FKRP,COQ8B,TRAPPC9,KIRREL3,FOXP2,MACROD2,DCLK2	52/778
19_Member	GO Biological Processes	GO:0007420	brain development	-6.0605	-3.31766	738,1021,1152,1436,1453,2057,2523,3480,3624,4040,4204,4211,4213,4897,5362,5629,5727,5830,6497,6659,7048,8482,8660,9253,9289,9353,9693,9760,10000,10395,22884,23030,23135,23353,23380,28514,54510,55558,55624,57463,65109,66000,79147,79934,83696,84623,93986,140733,166614	VPS51,CDK6,CKB,CSF1R,CSNK1D,EPOR,FUT1,IGF1R,INHBA,LRP6,MECP2,MEIS1,MEIS3P1,NRCAM,PLXNA2,PROX1,PTCH1,PEX5,SKI,SOX4,TGFBR2,SEMA7A,IRS2,NUMBL,ADGRG1,SLIT2,RAPGEF2,TOX,AKT3,DLC1,WDR37,KDM4B,KDM6B,SUN1,SRGAP2,DLL1,PCDH18,PLXNA3,POMGNT1,AMIGO1,UPF3B,TMEM108,FKRP,COQ8B,TRAPPC9,KIRREL3,FOXP2,MACROD2,DCLK2	49/729
19_Member	GO Biological Processes	GO:0021537	telencephalon development	-5.04611	-2.60969	1021,1436,2523,3480,3624,4204,5629,5830,6497,8482,9253,9289,9353,22884,23135,23353,23380,55558,55624,66000,83696,84623,93986,166614	CDK6,CSF1R,FUT1,IGF1R,INHBA,MECP2,PROX1,PEX5,SKI,SEMA7A,NUMBL,ADGRG1,SLIT2,WDR37,KDM6B,SUN1,SRGAP2,PLXNA3,POMGNT1,TMEM108,TRAPPC9,KIRREL3,FOXP2,DCLK2	24/275
19_Member	GO Biological Processes	GO:0021543	pallium development	-3.85895	-1.79508	1021,3480,4204,5629,5830,9289,9353,23135,23353,23380,55558,55624,66000,83696,84623,93986,166614	CDK6,IGF1R,MECP2,PROX1,PEX5,ADGRG1,SLIT2,KDM6B,SUN1,SRGAP2,PLXNA3,POMGNT1,TMEM108,TRAPPC9,KIRREL3,FOXP2,DCLK2	17/191
19_Member	GO Biological Processes	GO:0030900	forebrain development	-3.5279	-1.55774	1021,1436,2523,3480,3624,4204,5629,5830,6497,8482,9253,9289,9353,9693,9760,10395,22884,23135,23353,23380,55558,55624,66000,83696,84623,93986,166614	CDK6,CSF1R,FUT1,IGF1R,INHBA,MECP2,PROX1,PEX5,SKI,SEMA7A,NUMBL,ADGRG1,SLIT2,RAPGEF2,TOX,DLC1,WDR37,KDM6B,SUN1,SRGAP2,PLXNA3,POMGNT1,TMEM108,TRAPPC9,KIRREL3,FOXP2,DCLK2	27/407
19_Member	GO Biological Processes	GO:0021766	hippocampus development	-3.08778	-1.29194	1021,3480,4204,5629,23135,55558,55624,66000,84623,166614	CDK6,IGF1R,MECP2,PROX1,KDM6B,PLXNA3,POMGNT1,TMEM108,KIRREL3,DCLK2	10/94
19_Member	GO Biological Processes	GO:0021542	dentate gyrus development	-2.25554	-0.770377	1021,5629,55624,66000	CDK6,PROX1,POMGNT1,TMEM108	4/23
19_Member	GO Biological Processes	GO:0021761	limbic system development	-2.17518	-0.720699	1021,3480,4204,5629,23135,55558,55624,66000,84623,166614	CDK6,IGF1R,MECP2,PROX1,KDM6B,PLXNA3,POMGNT1,TMEM108,KIRREL3,DCLK2	10/125
20_Member	GO Biological Processes	GO:0031401	positive regulation of protein modification process	-6.19446	-3.40586	154,894,1026,1365,1436,1453,1906,1958,2011,3570,3624,4824,5008,5217,5601,5629,5747,5894,6376,6622,6659,6662,7010,7048,7525,8412,8440,8482,8555,9618,9693,9722,10267,10395,10401,23043,23141,23181,23411,51422,55011,57161,64754,65267,79092,79705,85456,115825,221927,338376,338773	ADRB2,CCND2,CDKN1A,CLDN3,CSF1R,CSNK1D,EDN1,EGR1,MARK2,IL6R,INHBA,NKX3-1,OSM,PFN2,MAPK9,PROX1,PTK2,RAF1,CX3CL1,SNCA,SOX4,SOX9,TEK,TGFBR2,YES1,BCAR3,NCK2,SEMA7A,CDC14B,TRAF4,RAPGEF2,NOS1AP,RAMP1,DLC1,PIAS3,TNIK,ANKLE2,DIP2A,SIRT1,PRKAG2,PIH1D1,PELI2,SMYD3,WNK3,CARD14,LRRK1,TNKS1BP1,WDFY2,BRAT1,IFNE,TMEM119	51/764
20_Member	GO Biological Processes	GO:0010562	positive regulation of phosphorus metabolic process	-5.43347	-2.86109	154,344,894,1026,1365,1436,1453,1826,1906,2011,3480,3570,3624,4824,5008,5217,5629,5747,5894,6376,6622,6662,7010,7048,7525,8412,8440,8482,9618,9693,10395,23043,23141,23411,51422,55011,57161,64754,65267,79092,79705,85456,115825,221927,338376,338773	ADRB2,APOC2,CCND2,CDKN1A,CLDN3,CSF1R,CSNK1D,DSCAM,EDN1,MARK2,IGF1R,IL6R,INHBA,NKX3-1,OSM,PFN2,PROX1,PTK2,RAF1,CX3CL1,SNCA,SOX9,TEK,TGFBR2,YES1,BCAR3,NCK2,SEMA7A,TRAF4,RAPGEF2,DLC1,TNIK,ANKLE2,SIRT1,PRKAG2,PIH1D1,PELI2,SMYD3,WNK3,CARD14,LRRK1,TNKS1BP1,WDFY2,BRAT1,IFNE,TMEM119	46/702
20_Member	GO Biological Processes	GO:0045937	positive regulation of phosphate metabolic process	-5.43347	-2.86109	154,344,894,1026,1365,1436,1453,1826,1906,2011,3480,3570,3624,4824,5008,5217,5629,5747,5894,6376,6622,6662,7010,7048,7525,8412,8440,8482,9618,9693,10395,23043,23141,23411,51422,55011,57161,64754,65267,79092,79705,85456,115825,221927,338376,338773	ADRB2,APOC2,CCND2,CDKN1A,CLDN3,CSF1R,CSNK1D,DSCAM,EDN1,MARK2,IGF1R,IL6R,INHBA,NKX3-1,OSM,PFN2,PROX1,PTK2,RAF1,CX3CL1,SNCA,SOX9,TEK,TGFBR2,YES1,BCAR3,NCK2,SEMA7A,TRAF4,RAPGEF2,DLC1,TNIK,ANKLE2,SIRT1,PRKAG2,PIH1D1,PELI2,SMYD3,WNK3,CARD14,LRRK1,TNKS1BP1,WDFY2,BRAT1,IFNE,TMEM119	46/702
20_Member	GO Biological Processes	GO:0001934	positive regulation of protein phosphorylation	-5.3603	-2.82878	154,894,1026,1365,1436,1453,1906,2011,3570,3624,4824,5008,5217,5629,5747,5894,6376,6622,6662,7010,7048,7525,8412,8482,9618,9693,23043,23411,51422,55011,57161,64754,65267,79092,79705,85456,115825,221927,338376,338773	ADRB2,CCND2,CDKN1A,CLDN3,CSF1R,CSNK1D,EDN1,MARK2,IL6R,INHBA,NKX3-1,OSM,PFN2,PROX1,PTK2,RAF1,CX3CL1,SNCA,SOX9,TEK,TGFBR2,YES1,BCAR3,SEMA7A,TRAF4,RAPGEF2,TNIK,SIRT1,PRKAG2,PIH1D1,PELI2,SMYD3,WNK3,CARD14,LRRK1,TNKS1BP1,WDFY2,BRAT1,IFNE,TMEM119	40/578
20_Member	GO Biological Processes	GO:0042327	positive regulation of phosphorylation	-5.31447	-2.80502	154,894,1026,1365,1436,1453,1826,1906,2011,3480,3570,3624,4824,5008,5217,5629,5747,5894,6376,6622,6662,7010,7048,7525,8412,8482,9618,9693,23043,23411,51422,55011,57161,64754,65267,79092,79705,85456,115825,221927,338376,338773	ADRB2,CCND2,CDKN1A,CLDN3,CSF1R,CSNK1D,DSCAM,EDN1,MARK2,IGF1R,IL6R,INHBA,NKX3-1,OSM,PFN2,PROX1,PTK2,RAF1,CX3CL1,SNCA,SOX9,TEK,TGFBR2,YES1,BCAR3,SEMA7A,TRAF4,RAPGEF2,TNIK,SIRT1,PRKAG2,PIH1D1,PELI2,SMYD3,WNK3,CARD14,LRRK1,TNKS1BP1,WDFY2,BRAT1,IFNE,TMEM119	42/623
20_Member	GO Biological Processes	GO:0045860	positive regulation of protein kinase activity	-2.44139	-0.888179	154,894,1026,1436,1906,2011,3570,5629,5747,6622,7048,9618,9693,23411,51422,55011,79092	ADRB2,CCND2,CDKN1A,CSF1R,EDN1,MARK2,IL6R,PROX1,PTK2,SNCA,TGFBR2,TRAF4,RAPGEF2,SIRT1,PRKAG2,PIH1D1,CARD14	17/256
20_Member	GO Biological Processes	GO:0033674	positive regulation of kinase activity	-2.40466	-0.863896	154,894,1026,1436,1906,2011,3480,3570,5629,5747,6622,7010,7048,9618,9693,23411,51422,55011,79092	ADRB2,CCND2,CDKN1A,CSF1R,EDN1,MARK2,IGF1R,IL6R,PROX1,PTK2,SNCA,TEK,TGFBR2,TRAF4,RAPGEF2,SIRT1,PRKAG2,PIH1D1,CARD14	19/302
20_Member	GO Biological Processes	GO:0051347	positive regulation of transferase activity	-2.33133	-0.815783	154,894,1026,1436,1906,2011,3480,3570,5629,5747,6622,7010,7048,8555,9618,9693,11284,23411,25849,51422,55011,79092	ADRB2,CCND2,CDKN1A,CSF1R,EDN1,MARK2,IGF1R,IL6R,PROX1,PTK2,SNCA,TEK,TGFBR2,CDC14B,TRAF4,RAPGEF2,PNKP,SIRT1,PARM1,PRKAG2,PIH1D1,CARD14	22/375

## Sheet: 1.5 Fig2h_metascape
Table 1.5	Fig2h_metascape
GroupID	Category	Term	Description	LogP	Log(q-value)	Genes	Symbols	InTerm_InList
1_Summary	GO Biological Processes	GO:0030031	cell projection assembly	-4.82213	-0.801116	9576,26052,121512,221178,3911,5154,23191,85452	LAMA5,PDGFA,SPAG6,CYFIP1,DNM3,CFAP74,FGD4,SPATA13	8/-
2_Summary	Reactome Gene Sets	R-HSA-1474244	Extracellular matrix organization	-4.62485	-0.801116	824,1286,1289,3687,3911,4326,5054,5154,5155,80781,89932,5768,9215,6510	CAPN2,COL4A4,COL5A1,ITGAX,LAMA5,MMP17,SERPINE1,PDGFA,PDGFB,COL18A1,PAPLN,QSOX1,LARGE1,SLC1A5	14/-
3_Summary	GO Biological Processes	GO:0032102	negative regulation of response to external stimulus	-4.45022	-0.801116	2895,3965,5054,5154,5155,5272,6480,7538,10507,11240,79651,147945,2321,3687,8013,11170,25777,57669,9231,11006,2312,4326,10148,80760,388512	GRID2,LGALS9,SERPINE1,PDGFA,PDGFB,SERPINB9,ST6GAL1,ZFP36,SEMA4D,PADI2,RHBDF2,NLRP4,FLT1,ITGAX,NR4A3,FAM107A,SUN2,EPB41L5,DLG5,LILRB4,FLG,MMP17,EBI3,ITIH5,CLEC17A	25/-
4_Summary	Reactome Gene Sets	R-HSA-3000171	Non-integrin membrane-ECM interactions	-4.43344	-0.801116	1286,1289,3911,5154,5155,824,2321,3687,5209,54541,896,84722,8013,5167,1454,3965,8325,4792,5054,7804,10507,51085,55022,9215,9394,80781,6721,5768	COL4A4,COL5A1,LAMA5,PDGFA,PDGFB,CAPN2,FLT1,ITGAX,PFKFB3,DDIT4,CCND3,PSRC1,NR4A3,ENPP1,CSNK1E,LGALS9,FZD8,NFKBIA,SERPINE1,LRP8,SEMA4D,MLXIPL,PID1,LARGE1,HS6ST1,COL18A1,SREBF2,QSOX1	28/-
5_Summary	GO Biological Processes	GO:0071396	cellular response to lipid	-4.38131	-0.801116	687,824,2203,4306,4792,5054,7538,7804,8013,11170,11240,54541,55022,15,5155,6507,5167,5272,23191,5017,860,2321,3911	KLF9,CAPN2,FBP1,NR3C2,NFKBIA,SERPINE1,ZFP36,LRP8,NR4A3,FAM107A,PADI2,DDIT4,PID1,AANAT,PDGFB,SLC1A3,ENPP1,SERPINB9,CYFIP1,OVOL1,RUNX2,FLT1,LAMA5	23/-
6_Summary	WikiPathways	WP2880	Glucocorticoid receptor pathway	-4.07454	-0.716259	1831,5272,5375,79056,121512,2289,5155,55630	TSC22D3,SERPINB9,PMP2,PRRG4,FGD4,FKBP5,PDGFB,SLC39A4	8/-
7_Summary	GO Biological Processes	GO:0046635	positive regulation of alpha-beta T cell activation	-4.01601	-0.716259	1604,3965,9308,10148,11006,5272,79651,147945,6480,9231,1831,11240,121260,5154,5155,8013	CD55,LGALS9,CD83,EBI3,LILRB4,SERPINB9,RHBDF2,NLRP4,ST6GAL1,DLG5,TSC22D3,PADI2,SLC15A4,PDGFA,PDGFB,NR4A3	16/-
8_Summary	GO Biological Processes	GO:0141005	retrotransposon silencing by heterochromatin formation	-3.967	-0.716259	27136,54456,122402,84215,5017,25777,101928601	MORC1,MOV10L1,TDRD9,ZNF541,OVOL1,SUN2,MEI4	7/-
9_Summary	GO Biological Processes	GO:2000052	positive regulation of non-canonical Wnt signaling pathway	-3.967	-0.716259	1454,22881,57664	CSNK1E,ANKRD6,PLEKHA4	3/-
10_Summary	GO Biological Processes	GO:0051056	regulation of small GTPase mediated signal transduction	-3.82509	-0.716259	2203,10507,22898,23526,26053,84253,121512,202243,221178	FBP1,SEMA4D,DENND3,ARHGAP45,AUTS2,GARNL3,FGD4,CCDC125,SPATA13	9/-
11_Summary	GO Biological Processes	GO:0045936	negative regulation of phosphate metabolic process	-3.79166	-0.716259	2203,5154,5155,5167,10217,10507,11006,51085,54541,55022	FBP1,PDGFA,PDGFB,ENPP1,CTDSPL,SEMA4D,LILRB4,MLXIPL,DDIT4,PID1	10/-
12_Summary	KEGG Pathway	hsa00770	Pantothenate and CoA biosynthesis	-3.51333	-0.530471	1807,5167,8875,3990,5214,9388,252969,115024	DPYS,ENPP1,VNN2,LIPC,PFKP,LIPG,NEIL2,NT5C3B	8/-
13_Summary	KEGG Pathway	hsa04979	Cholesterol metabolism	-3.50876	-0.530471	1593,3990,9388,114879,3423,5214,6507,8864,8875,79746,6721	CYP27A1,LIPC,LIPG,OSBPL5,IDS,PFKP,SLC1A3,PER2,VNN2,ECHDC3,SREBF2	11/-
14_Summary	KEGG Pathway	hsa04390	Hippo signaling pathway	-3.28951	-0.421733	896,1454,5054,7159,8325,9231,5583	CCND3,CSNK1E,SERPINE1,TP53BP2,FZD8,DLG5,PRKCH	7/-
15_Summary	GO Biological Processes	GO:0030029	actin filament-based process	-3.23126	-0.391505	2037,5154,5239,6324,7111,11170,25777,26053,57471,57669,85464,121512,9455	EPB41L2,PDGFA,PGM5,SCN1B,TMOD1,FAM107A,SUN2,AUTS2,ERMN,EPB41L5,SSH2,FGD4,HOMER2	13/-
16_Summary	GO Biological Processes	GO:0098657	import into cell	-3.19869	-0.382374	773,1454,1808,5167,6507,6510,6620,7804,11006,26052,55630,121260,286676	CACNA1A,CSNK1E,DPYSL2,ENPP1,SLC1A3,SLC1A5,SNCB,LRP8,LILRB4,DNM3,SLC39A4,SLC15A4,ILDR1	13/-
17_Summary	GO Biological Processes	GO:0032663	regulation of interleukin-2 production	-3.15722	-0.368621	7538,9308,9455,11006	ZFP36,CD83,HOMER2,LILRB4	4/-
18_Summary	GO Biological Processes	GO:0071345	cellular response to cytokine stimulus	-3.03944	-0.319773	824,1687,3965,4792,5155,5214,7538,7804,10148,11006,11240,55022,286676	CAPN2,GSDME,LGALS9,NFKBIA,PDGFB,PFKP,ZFP36,LRP8,EBI3,LILRB4,PADI2,PID1,ILDR1	13/-
19_Summary	WikiPathways	WP2839	Hair follicle development organogenesis part 2 of 3	-2.96396	-0.262513	860,3911,5154,2321,8013,8864	RUNX2,LAMA5,PDGFA,FLT1,NR4A3,PER2	6/-
20_Summary	KEGG Pathway	hsa00051	Fructose and mannose metabolism	-2.88649	-0.249501	2203,5209,5214,2321,5054	FBP1,PFKFB3,PFKP,FLT1,SERPINE1	5/-
1_Member	GO Biological Processes	GO:0030031	cell projection assembly	-4.82213	0	3911,5154,9576,23191,26052,85452,121512,221178	LAMA5,PDGFA,SPAG6,CYFIP1,DNM3,CFAP74,FGD4,SPATA13	8/444
1_Member	GO Biological Processes	GO:0046847	filopodium assembly	-2.11589	-0.801116	9576,26052,121512,221178	SPAG6,DNM3,FGD4,SPATA13	4/24
2_Member	Reactome Gene Sets	R-HSA-1474244	Extracellular matrix organization	-4.62485	-0.801116	824,1286,1289,3687,3911,4326,5054,5154,5155,80781	CAPN2,COL4A4,COL5A1,ITGAX,LAMA5,MMP17,SERPINE1,PDGFA,PDGFB,COL18A1	10/300
2_Member	Canonical Pathways	M5887	NABA BASEMENT MEMBRANES	-3.92203	-0.716259	1286,3911,80781,89932	COL4A4,LAMA5,COL18A1,PAPLN	4/40
2_Member	Reactome Gene Sets	R-HSA-3000178	ECM proteoglycans	-3.90418	-0.716259	1286,1289,3687,3911,5054	COL4A4,COL5A1,ITGAX,LAMA5,SERPINE1	5/76
2_Member	Reactome Gene Sets	R-HSA-1474228	Degradation of the extracellular matrix	-3.55484	-0.530471	824,1286,1289,3911,4326,80781	CAPN2,COL4A4,COL5A1,LAMA5,MMP17,COL18A1	6/140
2_Member	Canonical Pathways	M18	PID INTEGRIN1 PATHWAY	-3.08087	-0.328262	1286,1289,3911,80781	COL4A4,COL5A1,LAMA5,COL18A1	4/66
2_Member	Reactome Gene Sets	R-HSA-3000157	Laminin interactions	-3.04688	-0.319773	1286,3911,80781	COL4A4,LAMA5,COL18A1	3/30
2_Member	GO Biological Processes	GO:0030198	extracellular matrix organization	-2.72129	-0.164778	1286,1289,4326,5768,9215,80781,89932	COL4A4,COL5A1,MMP17,QSOX1,LARGE1,COL18A1,PAPLN	7/274
2_Member	GO Biological Processes	GO:0043062	extracellular structure organization	-2.71237	-0.164778	1286,1289,4326,5768,9215,80781,89932	COL4A4,COL5A1,MMP17,QSOX1,LARGE1,COL18A1,PAPLN	7/275
2_Member	GO Biological Processes	GO:0045229	external encapsulating structure organization	-2.7035	-0.164778	1286,1289,4326,5768,9215,80781,89932	COL4A4,COL5A1,MMP17,QSOX1,LARGE1,COL18A1,PAPLN	7/276
2_Member	Reactome Gene Sets	R-HSA-216083	Integrin cell surface interactions	-2.67279	-0.155555	1286,1289,3687,80781	COL4A4,COL5A1,ITGAX,COL18A1	4/85
2_Member	Canonical Pathways	M3005	NABA COLLAGENS	-2.56163	-0.0917879	1286,1289,80781	COL4A4,COL5A1,COL18A1	3/44
2_Member	Reactome Gene Sets	R-HSA-8948216	Collagen chain trimerization	-2.56163	-0.0917879	1286,1289,80781	COL4A4,COL5A1,COL18A1	3/44
2_Member	Canonical Pathways	M198	PID SYNDECAN 1 PATHWAY	-2.5064	-0.0724586	1286,1289,3911	COL4A4,COL5A1,LAMA5	3/46
2_Member	KEGG Pathway	hsa04974	Protein digestion and absorption	-2.37187	-0.0226056	1286,1289,6510,80781	COL4A4,COL5A1,SLC1A5,COL18A1	4/103
2_Member	Reactome Gene Sets	R-HSA-2022090	Assembly of collagen fibrils and other multimeric structures	-2.1616	0	1286,1289,80781	COL4A4,COL5A1,COL18A1	3/61
2_Member	Reactome Gene Sets	R-HSA-1442490	Collagen degradation	-2.10403	0	1286,1289,80781	COL4A4,COL5A1,COL18A1	3/64
2_Member	Reactome Gene Sets	R-HSA-1650814	Collagen biosynthesis and modifying enzymes	-2.04941	0	1286,1289,80781	COL4A4,COL5A1,COL18A1	3/67
3_Member	GO Biological Processes	GO:0032102	negative regulation of response to external stimulus	-4.45022	-0.801116	2895,3965,5054,5154,5155,5272,6480,7538,10507,11240,79651,147945	GRID2,LGALS9,SERPINE1,PDGFA,PDGFB,SERPINB9,ST6GAL1,ZFP36,SEMA4D,PADI2,RHBDF2,NLRP4	12/453
3_Member	GO Biological Processes	GO:0030335	positive regulation of cell migration	-2.90029	-0.249501	2321,3687,3965,5054,5154,5155,8013,10507,11170,25777,57669	FLT1,ITGAX,LGALS9,SERPINE1,PDGFA,PDGFB,NR4A3,SEMA4D,FAM107A,SUN2,EPB41L5	11/580
3_Member	GO Biological Processes	GO:2000147	positive regulation of cell motility	-2.74477	-0.170721	2321,3687,3965,5054,5154,5155,8013,10507,11170,25777,57669	FLT1,ITGAX,LGALS9,SERPINE1,PDGFA,PDGFB,NR4A3,SEMA4D,FAM107A,SUN2,EPB41L5	11/607
3_Member	GO Biological Processes	GO:0040017	positive regulation of locomotion	-2.66795	-0.155555	2321,3687,3965,5054,5154,5155,8013,10507,11170,25777,57669	FLT1,ITGAX,LGALS9,SERPINE1,PDGFA,PDGFB,NR4A3,SEMA4D,FAM107A,SUN2,EPB41L5	11/621
3_Member	GO Biological Processes	GO:0050920	regulation of chemotaxis	-2.45477	-0.0493845	3965,5054,5155,6480,10507,11240	LGALS9,SERPINE1,PDGFB,ST6GAL1,SEMA4D,PADI2	6/229
3_Member	GO Biological Processes	GO:0007162	negative regulation of cell adhesion	-2.42421	-0.0335531	3965,5054,9231,10507,11006,11170,57669	LGALS9,SERPINE1,DLG5,SEMA4D,LILRB4,FAM107A,EPB41L5	7/310
3_Member	Canonical Pathways	M5885	NABA MATRISOME ASSOCIATED	-2.05882	0	2312,3965,4326,5054,5154,5155,5272,10148,10507,80760,388512	FLG,LGALS9,MMP17,SERPINE1,PDGFA,PDGFB,SERPINB9,EBI3,SEMA4D,ITIH5,CLEC17A	11/751
4_Member	Reactome Gene Sets	R-HSA-3000171	Non-integrin membrane-ECM interactions	-4.43344	-0.801116	1286,1289,3911,5154,5155	COL4A4,COL5A1,LAMA5,PDGFA,PDGFB	5/59
4_Member	GO Biological Processes	GO:0071071	regulation of phospholipid biosynthetic process	-3.87885	-0.716259	824,5154,5155	CAPN2,PDGFA,PDGFB	3/16
4_Member	WikiPathways	WP3932	Focal adhesion PI3K Akt mTOR signaling pathway	-3.84654	-0.716259	1286,1289,2321,3687,3911,5154,5155,5209,54541	COL4A4,COL5A1,FLT1,ITGAX,LAMA5,PDGFA,PDGFB,PFKFB3,DDIT4	9/302
4_Member	WikiPathways	WP306	Focal adhesion	-3.53445	-0.530471	824,896,1286,2321,3911,5154,5155	CAPN2,CCND3,COL4A4,FLT1,LAMA5,PDGFA,PDGFB	7/199
4_Member	KEGG Pathway	hsa04510	Focal adhesion	-3.49516	-0.530471	824,896,1286,2321,3911,5154,5155	CAPN2,CCND3,COL4A4,FLT1,LAMA5,PDGFA,PDGFB	7/202
4_Member	Reactome Gene Sets	R-HSA-186797	Signaling by PDGF	-3.29388	-0.421733	1286,1289,5154,5155	COL4A4,COL5A1,PDGFA,PDGFB	4/58
4_Member	GO Biological Processes	GO:1903725	regulation of phospholipid metabolic process	-2.88649	-0.249501	824,5154,5155	CAPN2,PDGFA,PDGFB	3/34
4_Member	GO Biological Processes	GO:0071902	positive regulation of protein serine/threonine kinase activity	-2.8784	-0.249501	896,2321,5154,5155,84722	CCND3,FLT1,PDGFA,PDGFB,PSRC1	5/127
4_Member	GO Biological Processes	GO:0048008	platelet-derived growth factor receptor signaling pathway	-2.77912	-0.186467	5154,5155,8013	PDGFA,PDGFB,NR4A3	3/37
4_Member	GO Biological Processes	GO:0031952	regulation of protein autophosphorylation	-2.74542	-0.170721	5154,5155,5167	PDGFA,PDGFB,ENPP1	3/38
4_Member	WikiPathways	WP5087	Pleural mesothelioma	-2.6883	-0.156315	896,1286,1454,2321,3911,3965,5154,5155,8325	CCND3,COL4A4,CSNK1E,FLT1,LAMA5,LGALS9,PDGFA,PDGFB,FZD8	9/439
4_Member	WikiPathways	WP2526	PDGF pathway	-2.68083	-0.155555	4792,5154,5155	NFKBIA,PDGFA,PDGFB	3/40
4_Member	GO Biological Processes	GO:0014910	regulation of smooth muscle cell migration	-2.56499	-0.0917879	5054,5154,5155,8013	SERPINE1,PDGFA,PDGFB,NR4A3	4/91
4_Member	GO Biological Processes	GO:0030195	negative regulation of blood coagulation	-2.53368	-0.0864035	5054,5154,5155	SERPINE1,PDGFA,PDGFB	3/45
4_Member	GO Biological Processes	GO:1900047	negative regulation of hemostasis	-2.5064	-0.0724586	5054,5154,5155	SERPINE1,PDGFA,PDGFB	3/46
4_Member	GO Biological Processes	GO:0050819	negative regulation of coagulation	-2.42832	-0.0335531	5054,5154,5155	SERPINE1,PDGFA,PDGFB	3/49
4_Member	GO Biological Processes	GO:0010562	positive regulation of phosphorus metabolic process	-2.26838	0	824,896,2321,5154,5155,7804,8325,10507,51085,55022,84722	CAPN2,CCND3,FLT1,PDGFA,PDGFB,LRP8,FZD8,SEMA4D,MLXIPL,PID1,PSRC1	11/702
4_Member	GO Biological Processes	GO:0045937	positive regulation of phosphate metabolic process	-2.26838	0	824,896,2321,5154,5155,7804,8325,10507,51085,55022,84722	CAPN2,CCND3,FLT1,PDGFA,PDGFB,LRP8,FZD8,SEMA4D,MLXIPL,PID1,PSRC1	11/702
4_Member	GO Biological Processes	GO:0045860	positive regulation of protein kinase activity	-2.22177	0	896,2321,5154,5155,7804,84722	CCND3,FLT1,PDGFA,PDGFB,LRP8,PSRC1	6/256
4_Member	WikiPathways	WP4172	PI3K Akt signaling pathway	-2.21576	0	896,1286,2321,3911,5154,5155,54541	CCND3,COL4A4,FLT1,LAMA5,PDGFA,PDGFB,DDIT4	7/339
4_Member	GO Biological Processes	GO:0001568	blood vessel development	-2.17268	0	1289,2321,5054,5154,5155,8325,9215,9394,80781	COL5A1,FLT1,SERPINE1,PDGFA,PDGFB,FZD8,LARGE1,HS6ST1,COL18A1	9/527
4_Member	GO Biological Processes	GO:0046890	regulation of lipid biosynthetic process	-2.15874	0	824,5154,5155,6721,51085	CAPN2,PDGFA,PDGFB,SREBF2,MLXIPL	5/187
4_Member	KEGG Pathway	hsa04151	PI3K-Akt signaling pathway	-2.08537	0	896,1286,2321,3911,5154,5155,54541	CCND3,COL4A4,FLT1,LAMA5,PDGFA,PDGFB,DDIT4	7/359
4_Member	GO Biological Processes	GO:0001944	vasculature development	-2.07232	0	1289,2321,5054,5154,5155,8325,9215,9394,80781	COL5A1,FLT1,SERPINE1,PDGFA,PDGFB,FZD8,LARGE1,HS6ST1,COL18A1	9/547
4_Member	Reactome Gene Sets	R-HSA-114608	Platelet degranulation	-2.03066	0	5054,5154,5155,5768	SERPINE1,PDGFA,PDGFB,QSOX1	4/129
4_Member	GO Biological Processes	GO:0030193	regulation of blood coagulation	-2.0145	0	5054,5154,5155	SERPINE1,PDGFA,PDGFB	3/69
5_Member	GO Biological Processes	GO:0071396	cellular response to lipid	-4.38131	-0.801116	687,824,2203,4306,4792,5054,7538,7804,8013,11170,11240,54541,55022	KLF9,CAPN2,FBP1,NR3C2,NFKBIA,SERPINE1,ZFP36,LRP8,NR4A3,FAM107A,PADI2,DDIT4,PID1	13/536
5_Member	GO Biological Processes	GO:0071407	cellular response to organic cyclic compound	-4.36787	-0.801116	15,687,2203,4306,5155,6507,7538,7804,8013,11170,11240,54541	AANAT,KLF9,FBP1,NR3C2,PDGFB,SLC1A3,ZFP36,LRP8,NR4A3,FAM107A,PADI2,DDIT4	12/462
5_Member	GO Biological Processes	GO:0071383	cellular response to steroid hormone stimulus	-4.22389	-0.724086	687,4306,7538,8013,11170,11240,54541	KLF9,NR3C2,ZFP36,NR4A3,FAM107A,PADI2,DDIT4	7/154
5_Member	GO Biological Processes	GO:0032870	cellular response to hormone stimulus	-4.00909	-0.716259	687,2203,4306,5167,5272,7538,8013,11170,11240,23191,54541,55022	KLF9,FBP1,NR3C2,ENPP1,SERPINB9,ZFP36,NR4A3,FAM107A,PADI2,CYFIP1,DDIT4,PID1	12/504
5_Member	GO Biological Processes	GO:0071385	cellular response to glucocorticoid stimulus	-3.41293	-0.465965	687,7538,11170,54541	KLF9,ZFP36,FAM107A,DDIT4	4/54
5_Member	GO Biological Processes	GO:0048545	response to steroid hormone	-3.32479	-0.427042	15,687,4306,7538,8013,11170,11240,54541	AANAT,KLF9,NR3C2,ZFP36,NR4A3,FAM107A,PADI2,DDIT4	8/283
5_Member	GO Biological Processes	GO:0071384	cellular response to corticosteroid stimulus	-3.13133	-0.366212	687,7538,11170,54541	KLF9,ZFP36,FAM107A,DDIT4	4/64
5_Member	GO Biological Processes	GO:0009725	response to hormone	-2.79982	-0.18731	15,687,2203,4306,5167,5272,7538,8013,11170,11240,23191,54541,55022	AANAT,KLF9,FBP1,NR3C2,ENPP1,SERPINB9,ZFP36,NR4A3,FAM107A,PADI2,CYFIP1,DDIT4,PID1	13/785
5_Member	GO Biological Processes	GO:0051384	response to glucocorticoid	-2.7755	-0.186467	15,687,7538,11170,54541	AANAT,KLF9,ZFP36,FAM107A,DDIT4	5/134
5_Member	GO Biological Processes	GO:0031960	response to corticosteroid	-2.48911	-0.0632891	15,687,7538,11170,54541	AANAT,KLF9,ZFP36,FAM107A,DDIT4	5/156
5_Member	GO Biological Processes	GO:0010837	regulation of keratinocyte proliferation	-2.47977	-0.0629032	687,5017,7538	KLF9,OVOL1,ZFP36	3/47
5_Member	GO Biological Processes	GO:0050678	regulation of epithelial cell proliferation	-2.33567	0	687,860,2321,3911,5017,5155,7538,8013	KLF9,RUNX2,FLT1,LAMA5,OVOL1,PDGFB,ZFP36,NR4A3	8/407
6_Member	WikiPathways	WP2880	Glucocorticoid receptor pathway	-4.07454	-0.716259	1831,5272,5375,79056,121512	TSC22D3,SERPINB9,PMP2,PRRG4,FGD4	5/70
6_Member	WikiPathways	WP2882	Nuclear receptors meta pathway	-3.03121	-0.319773	1831,2289,5155,5272,5375,55630,79056,121512	TSC22D3,FKBP5,PDGFB,SERPINB9,PMP2,SLC39A4,PRRG4,FGD4	8/314
7_Member	GO Biological Processes	GO:0046635	positive regulation of alpha-beta T cell activation	-4.01601	-0.716259	1604,3965,9308,10148,11006	CD55,LGALS9,CD83,EBI3,LILRB4	5/72
7_Member	GO Biological Processes	GO:0046641	positive regulation of alpha-beta T cell proliferation	-3.33705	-0.427042	1604,3965,10148	CD55,LGALS9,EBI3	3/24
7_Member	GO Biological Processes	GO:0046634	regulation of alpha-beta T cell activation	-3.0711	-0.328262	1604,3965,9308,10148,11006	CD55,LGALS9,CD83,EBI3,LILRB4	5/115
7_Member	GO Biological Processes	GO:0050777	negative regulation of immune response	-2.81352	-0.19289	1604,3965,5272,11006,79651,147945	CD55,LGALS9,SERPINB9,LILRB4,RHBDF2,NLRP4	6/194
7_Member	GO Biological Processes	GO:0046640	regulation of alpha-beta T cell proliferation	-2.59028	-0.0917879	1604,3965,10148	CD55,LGALS9,EBI3	3/43
7_Member	GO Biological Processes	GO:2000516	positive regulation of CD4-positive, alpha-beta T cell activation	-2.53368	-0.0864035	1604,3965,9308	CD55,LGALS9,CD83	3/45
7_Member	GO Biological Processes	GO:0032944	regulation of mononuclear cell proliferation	-2.34714	-0.00223993	1604,3965,6480,9231,10148,11006	CD55,LGALS9,ST6GAL1,DLG5,EBI3,LILRB4	6/241
7_Member	GO Biological Processes	GO:0046638	positive regulation of alpha-beta T cell differentiation	-2.30923	0	3965,9308,11006	LGALS9,CD83,LILRB4	3/54
7_Member	GO Biological Processes	GO:0002707	negative regulation of lymphocyte mediated immunity	-2.24349	0	3965,5272,11006	LGALS9,SERPINB9,LILRB4	3/57
7_Member	GO Biological Processes	GO:0042129	regulation of T cell proliferation	-2.21722	0	1604,3965,9231,10148,11006	CD55,LGALS9,DLG5,EBI3,LILRB4	5/181
7_Member	GO Biological Processes	GO:0002683	negative regulation of immune system process	-2.17784	0	1604,1831,3965,5272,9231,11006,11240,79651,147945	CD55,TSC22D3,LGALS9,SERPINB9,DLG5,LILRB4,PADI2,RHBDF2,NLRP4	9/526
7_Member	GO Biological Processes	GO:0002706	regulation of lymphocyte mediated immunity	-2.16832	0	1604,3965,5272,11006,121260	CD55,LGALS9,SERPINB9,LILRB4,SLC15A4	5/186
7_Member	GO Biological Processes	GO:0050865	regulation of cell activation	-2.14366	0	1604,3965,5154,5155,8013,9231,9308,10148,11006,121260	CD55,LGALS9,PDGFA,PDGFB,NR4A3,DLG5,CD83,EBI3,LILRB4,SLC15A4	10/630
7_Member	GO Biological Processes	GO:0070663	regulation of leukocyte proliferation	-2.13567	0	1604,3965,6480,9231,10148,11006	CD55,LGALS9,ST6GAL1,DLG5,EBI3,LILRB4	6/267
7_Member	GO Biological Processes	GO:0002698	negative regulation of immune effector process	-2.12634	0	1604,3965,5272,11006	CD55,LGALS9,SERPINB9,LILRB4	4/121
7_Member	GO Biological Processes	GO:0032653	regulation of interleukin-10 production	-2.08551	0	3965,9308,11006	LGALS9,CD83,LILRB4	3/65
7_Member	GO Biological Processes	GO:1903039	positive regulation of leukocyte cell-cell adhesion	-2.06128	0	1604,3965,8013,9308,10148,11006	CD55,LGALS9,NR4A3,CD83,EBI3,LILRB4	6/277
7_Member	GO Biological Processes	GO:0002704	negative regulation of leukocyte mediated immunity	-2.03181	0	3965,5272,11006	LGALS9,SERPINB9,LILRB4	3/68
8_Member	GO Biological Processes	GO:0141005	retrotransposon silencing by heterochromatin formation	-3.967	-0.716259	27136,54456,122402	MORC1,MOV10L1,TDRD9	3/15
8_Member	GO Biological Processes	GO:0010526	retrotransposon silencing	-2.88649	-0.249501	27136,54456,122402	MORC1,MOV10L1,TDRD9	3/34
8_Member	GO Biological Processes	GO:0007140	male meiotic nuclear division	-2.28688	0	54456,84215,122402	MOV10L1,ZNF541,TDRD9	3/55
8_Member	GO Biological Processes	GO:0051321	meiotic cell cycle	-2.22984	0	5017,25777,54456,84215,122402,101928601	OVOL1,SUN2,MOV10L1,ZNF541,TDRD9,MEI4	6/255
8_Member	GO Biological Processes	GO:1903046	meiotic cell cycle process	-2.11175	0	5017,54456,84215,122402,101928601	OVOL1,MOV10L1,ZNF541,TDRD9,MEI4	5/192
9_Member	GO Biological Processes	GO:2000052	positive regulation of non-canonical Wnt signaling pathway	-3.967	-0.716259	1454,22881,57664	CSNK1E,ANKRD6,PLEKHA4	3/15
9_Member	GO Biological Processes	GO:2000050	regulation of non-canonical Wnt signaling pathway	-3.18321	-0.382374	1454,22881,57664	CSNK1E,ANKRD6,PLEKHA4	3/27
10_Member	GO Biological Processes	GO:0051056	regulation of small GTPase mediated signal transduction	-3.82509	-0.716259	2203,10507,22898,23526,26053,84253,121512,202243,221178	FBP1,SEMA4D,DENND3,ARHGAP45,AUTS2,GARNL3,FGD4,CCDC125,SPATA13	9/304
11_Member	GO Biological Processes	GO:0045936	negative regulation of phosphate metabolic process	-3.79166	-0.716259	2203,5154,5155,5167,10217,10507,11006,51085,54541,55022	FBP1,PDGFA,PDGFB,ENPP1,CTDSPL,SEMA4D,LILRB4,MLXIPL,DDIT4,PID1	10/378
11_Member	GO Biological Processes	GO:0010563	negative regulation of phosphorus metabolic process	-3.78241	-0.716259	2203,5154,5155,5167,10217,10507,11006,51085,54541,55022	FBP1,PDGFA,PDGFB,ENPP1,CTDSPL,SEMA4D,LILRB4,MLXIPL,DDIT4,PID1	10/379
11_Member	GO Biological Processes	GO:1903579	negative regulation of ATP metabolic process	-3.39302	-0.463087	2203,54541,55022	FBP1,DDIT4,PID1	3/23
11_Member	GO Biological Processes	GO:1900543	negative regulation of purine nucleotide metabolic process	-3.23234	-0.391505	2203,54541,55022	FBP1,DDIT4,PID1	3/26
11_Member	GO Biological Processes	GO:0045980	negative regulation of nucleotide metabolic process	-3.18321	-0.382374	2203,54541,55022	FBP1,DDIT4,PID1	3/27
11_Member	GO Biological Processes	GO:1903578	regulation of ATP metabolic process	-2.93913	-0.257942	2203,51085,54541,55022	FBP1,MLXIPL,DDIT4,PID1	4/72
11_Member	GO Biological Processes	GO:1900542	regulation of purine nucleotide metabolic process	-2.56499	-0.0917879	2203,51085,54541,55022	FBP1,MLXIPL,DDIT4,PID1	4/91
11_Member	GO Biological Processes	GO:0006140	regulation of nucleotide metabolic process	-2.54781	-0.0864035	2203,51085,54541,55022	FBP1,MLXIPL,DDIT4,PID1	4/92
11_Member	GO Biological Processes	GO:0006110	regulation of glycolytic process	-2.37914	-0.0254648	2203,51085,54541	FBP1,MLXIPL,DDIT4	3/51
11_Member	GO Biological Processes	GO:0030811	regulation of nucleotide catabolic process	-2.37914	-0.0254648	2203,51085,54541	FBP1,MLXIPL,DDIT4	3/51
11_Member	GO Biological Processes	GO:0033121	regulation of purine nucleotide catabolic process	-2.37914	-0.0254648	2203,51085,54541	FBP1,MLXIPL,DDIT4	3/51
11_Member	GO Biological Processes	GO:0045912	negative regulation of carbohydrate metabolic process	-2.26497	0	2203,5167,54541	FBP1,ENPP1,DDIT4	3/56
11_Member	GO Biological Processes	GO:0006109	regulation of carbohydrate metabolic process	-2.20731	0	2203,5155,5167,51085,54541	FBP1,PDGFB,ENPP1,MLXIPL,DDIT4	5/182
11_Member	GO Biological Processes	GO:0043470	regulation of carbohydrate catabolic process	-2.1616	0	2203,51085,54541	FBP1,MLXIPL,DDIT4	3/61
12_Member	KEGG Pathway	hsa00770	Pantothenate and CoA biosynthesis	-3.51333	-0.530471	1807,5167,8875	DPYS,ENPP1,VNN2	3/21
12_Member	GO Biological Processes	GO:0046434	organophosphate catabolic process	-2.93075	-0.257942	1807,3990,5167,5214,9388,252969	DPYS,LIPC,ENPP1,PFKP,LIPG,NEIL2	6/184
12_Member	KEGG Pathway	hsa00240	Pyrimidine metabolism	-2.22243	0	1807,5167,115024	DPYS,ENPP1,NT5C3B	3/58
13_Member	KEGG Pathway	hsa04979	Cholesterol metabolism	-3.50876	-0.530471	1593,3990,9388,114879	CYP27A1,LIPC,LIPG,OSBPL5	4/51
13_Member	WikiPathways	WP5304	Cholesterol metabolism	-2.93913	-0.257942	1593,3990,9388,114879	CYP27A1,LIPC,LIPG,OSBPL5	4/72
13_Member	GO Biological Processes	GO:0032787	monocarboxylic acid metabolic process	-2.20912	0	1593,3423,3990,5214,6507,8864,8875,9388,79746	CYP27A1,IDS,LIPC,PFKP,SLC1A3,PER2,VNN2,LIPG,ECHDC3	9/520
13_Member	GO Biological Processes	GO:0008203	cholesterol metabolic process	-2.16418	0	1593,3990,6721,114879	CYP27A1,LIPC,SREBF2,OSBPL5	4/118
13_Member	GO Biological Processes	GO:1902652	secondary alcohol metabolic process	-2.03066	0	1593,3990,6721,114879	CYP27A1,LIPC,SREBF2,OSBPL5	4/129
14_Member	KEGG Pathway	hsa04390	Hippo signaling pathway	-3.28951	-0.421733	896,1454,5054,7159,8325,9231	CCND3,CSNK1E,SERPINE1,TP53BP2,FZD8,DLG5	6/157
14_Member	WikiPathways	WP399	Wnt signaling pathway and pluripotency	-2.38695	-0.0254648	896,1454,5583,8325	CCND3,CSNK1E,PRKCH,FZD8	4/102
15_Member	GO Biological Processes	GO:0030029	actin filament-based process	-3.23126	-0.391505	2037,5154,5239,6324,7111,11170,25777,26053,57471,57669,85464,121512	EPB41L2,PDGFA,PGM5,SCN1B,TMOD1,FAM107A,SUN2,AUTS2,ERMN,EPB41L5,SSH2,FGD4	12/614
15_Member	GO Biological Processes	GO:0030036	actin cytoskeleton organization	-2.58492	-0.0917879	2037,5154,5239,7111,11170,26053,57471,57669,85464,121512	EPB41L2,PDGFA,PGM5,TMOD1,FAM107A,AUTS2,ERMN,EPB41L5,SSH2,FGD4	10/544
15_Member	Reactome Gene Sets	R-HSA-6794361	Neurexins and neuroligins	-2.28688	0	2037,9455,57669	EPB41L2,HOMER2,EPB41L5	3/55
15_Member	GO Biological Processes	GO:0031032	actomyosin structure organization	-2.08961	0	2037,5239,7111,57669	EPB41L2,PGM5,TMOD1,EPB41L5	4/124
16_Member	GO Biological Processes	GO:0098657	import into cell	-3.19869	-0.382374	773,1454,1808,5167,6507,6510,6620,7804,11006,26052,55630,121260,286676	CACNA1A,CSNK1E,DPYSL2,ENPP1,SLC1A3,SLC1A5,SNCB,LRP8,LILRB4,DNM3,SLC39A4,SLC15A4,ILDR1	13/709
16_Member	GO Biological Processes	GO:0098739	import across plasma membrane	-2.40794	-0.0254648	773,6507,6510,55630,121260	CACNA1A,SLC1A3,SLC1A5,SLC39A4,SLC15A4	5/163
16_Member	WikiPathways	WP2267	Synaptic vesicle pathway	-2.37914	-0.0254648	773,6507,26052	CACNA1A,SLC1A3,DNM3	3/51
16_Member	GO Biological Processes	GO:1902475	L-alpha-amino acid transmembrane transport	-2.08551	0	6507,6510,121260	SLC1A3,SLC1A5,SLC15A4	3/65
17_Member	GO Biological Processes	GO:0032663	regulation of interleukin-2 production	-3.15722	-0.368621	7538,9308,9455,11006	ZFP36,CD83,HOMER2,LILRB4	4/63
17_Member	GO Biological Processes	GO:0032703	negative regulation of interleukin-2 production	-3.13601	-0.366212	7538,9455,11006	ZFP36,HOMER2,LILRB4	3/28
18_Member	GO Biological Processes	GO:0071345	cellular response to cytokine stimulus	-3.03944	-0.319773	824,1687,3965,4792,5155,5214,7538,7804,10148,11006,11240,55022,286676	CAPN2,GSDME,LGALS9,NFKBIA,PDGFB,PFKP,ZFP36,LRP8,EBI3,LILRB4,PADI2,PID1,ILDR1	13/738
19_Member	WikiPathways	WP2839	Hair follicle development organogenesis part 2 of 3	-2.96396	-0.262513	860,3911,5154	RUNX2,LAMA5,PDGFA	3/32
19_Member	KEGG Pathway	hsa05202	Transcriptional misregulation in cancer	-2.10253	0	860,2321,5154,8013,8864	RUNX2,FLT1,PDGFA,NR4A3,PER2	5/193
20_Member	KEGG Pathway	hsa00051	Fructose and mannose metabolism	-2.88649	-0.249501	2203,5209,5214	FBP1,PFKFB3,PFKP	3/34
20_Member	KEGG Pathway	hsa04066	HIF-1 signaling pathway	-2.29893	0	2321,5054,5209,5214	FLT1,SERPINE1,PFKFB3,PFKP	4/108

## Sheet: 1.6 Fig2l_venn diagram
Table 1.6	Fig2l_venn diagram		Unique genes in Gosselin et al 2017 (1758)	Unique genes in up_PN_iHPC_CNS (712)	Overlapping genes (314)
List of genes corresponding to the Venn diagram in Figure 2l, including genes upregulated in Gosselin et al. (2017), genes increased in PN and iHPC engrafted cells in the CNS, and the overlapping genes			CSF3R	PCDHB2	PALD1
			CX3CR1	RIMS3	SORL1
			C3	MYO6	GSTM2
			PLD4	KHDRBS3	CSF1R
			P2RY13	PCAT7	ARGLU1
			SIGLEC10	COCH	RASGEF1C
			ENTPD1	PAQR5	METTL7A
			SIGLEC8	TJP1	FGD2
			P2RY12	CCND2	PLVAP
			GAL3ST4	ZFYVE9	LINC01736
			SLCO2B1	NEO1	GNG7
			ST6GAL1	SGCB	SRGAP2
			MEF2A	SELENBP1	SYNDIG1
			VASH1	NEXMIF	ADAMTSL2
			KAT2A	LRP6	SIPA1
			AOAH	EGFL7	KCNC3
			EPB41L2	EFNB2	TAL1
			ARHGEF6	LRP5	SPNS2
			UBA7	PLCXD3	MYO15B
			TRIM22	WNK3	SLC15A2
			DENND3	PER1	CSGALNACT1
			LOC100129083	IQCJ.SCHIP1	VSIR
			TMEM173	RAB11FIP5	TIAM1
			TLR7	DLC1	ACY3
			GPR34	DOCK6	IGSF21
			PLXDC2	EMILIN1	DAGLB
			LOC100506603	SPRY1	ADAMTS10
			LOC100507006	NPTXR	NAA40
			CD302	SHE	SMAP2
			STX16	SHTN1	NAV3
			PGGHG	GIPC3	TNFRSF13C
			ADAM28	TBXA2R	MAN2C1
			MLXIPL	IRS2	DKFZP586I1420
			INPP5D	APBA2	LRRK1
			APPL2	AKT3	MMRN1
			FYB	SEMA7A	ANKRD44
			TREML1	MATK	IFNGR1
			SFMBT2	LINC00537	FRMD4A
			PLCB2	GRASP	COL8A2
			CCDC88B	PCDHGB6	MCF2L
			CARD9	RBM19	NUDT3
			LPAR5	GATA4	ADRB2
			TTLL3	WASF3	MEST
			ADCY7	LRP1B	PMS1
			TM6SF1	CAMK2B	ZNF846
			GAB3	LOC145694	FAM166B
			KIAA0141	NOS1AP	RASGRP2
			RHBDF2	PNMA8A	PIEZO1
			TLR5	GLIS3	COL9A2
			LTC4S	LINC.PINT	RECK
			STX16-NPEPL1	CDC14B	ARRDC5
			PNISR	PCDHGA10	RIN2
			LY75-CD302	GABRA3	PLAT
			GAS6-AS1	PCDHGB7	ACKR2
			FAM105A	PURPL	CYTH3
			ARHGAP27P1-BPTFP1-KPNA2P3	APOC2	RAP1GAP2
			RNF166	GRASP.AS1	C16orf58
			ARHGAP27	ERF	TUBGCP6
			ACSM5	IGF1R	EMID1
			CARD11	APOC4.APOC2	MAST3
			PCED1B	NCKAP1	PATZ1
			AXL	DNALI1	DGKA
			TBXAS1	TSC22D2	PIK3IP1
			PLAGL1	DOCK3	ZASP
			LRMP	SORCS1	CIRBP
			OLFML3	NECTIN3	GALNT2
			ACSS1	CA8	BIN1
			NLRP1	BCAR3	RGL3
			ERMAP	C3orf70	GGT7
			MERTK	CDK6	WDFY2
			CD74	PCDHGC4	KBTBD12
			AZIN2	ABR	ARRDC1
			RYR1	DCLK2	SERPINF1
			PSMA3-AS1	TNIK	FAM149A
			BLNK	SOX4	MIGA2
			MGAT4A	AHCYL1	IGSF10
			KCNQ3	NBEA	TGFBR2
			LOXL3	ARMH4	EXD3
			SLC40A1	CCDC168	CCDC84
			GPCPD1	PCDHGC5	LRCH4
			FGL2	CAMSAP1	NRBP2
			IKZF1	SHC1	CEACAM21
			ZNF362	NAP1L3	ORMDL1
			CIITA	EML5	ABCC4
			ZFP36L2	OLR1	IPCEF1
			ZMAT1	ALPK3	LCAT
			LRRC4	PCDHGB2	JAM2
			SRSF5	ZNF667	ST6GALNAC3
			TBC1D4	PCDHGB1	LOC155060
			PCED1A	PCDHGB4	PACS2
			SEMA4D	PCDHGA3	LINC01141
			EMB	PCDHGA1	MSLN
			PKN2	SLC25A25	PAN3
			STAMBPL1	PCDHGA8	PIGL
			SALL1	PCDHGA2	EPOR
			DMTF1	PCDHGA4	OXER1
			RCSD1	SCML2	HAAO
			NAPSB	GLDN	SLC25A37
			PABPC1L	DPP4	MED12L
			LPAR2	PCDHGA5	TLN2
			TLR10	MIR31HG	POLM
			MKNK1	LRIG3	LY6G5B
			ARHGEF1	ADAMTS17	CD3EAP
			MTHFD1L	PLK3	KIAA1211L
			GGTA1P	PTGER4P2.CDK2AP2P2	INTS10
			RPS6KA4	JAM3	AMOT
			PHYKPL	RALGPS2	SUN1
			LINC01480	PCDHA4	CITED4
			TNFRSF25	PDE3B	BHLHE41
			TLR3	ZNF827	BRINP2
			PLEKHG5	PCDHGA9	GSTM4
			ZNF276	NXN	MIR503HG
			NPEPL1	LOC399975	TCEA2
			RGL2	GSTM3	CCDC40
			FMNL3	LINC01854	LOC105375218
			MAF	TBC1D16	FRAT1
			IDUA	RASSF8	ZNF608
			SELPLG	TSPAN5	LINC01529
			CXCL12	PCDHGA7	ZNF26
			PAQR8	IFNE	LY75
			MSH5	PTCH1	CROCC
			PRPF40B	PCDHGA11	GSTM2P1
			ITIH4	PCDHGA6	PTPN18
			AHSA2	MIR3605	DIP2A
			CCDC18-AS1	CYTH2	DLEC1
			CSAD	ST6GALNAC6	ZNF783
			PCYOX1L	OVOS2	DSCAM
			INTS3	NKX3.1	LINGO3
			LENG8	PCDHGB3	PGAM2
			TMEM175	MACROD2	TMEM52B
			ALG13	PHC2	DHRS9
			RGS18	MIR6737	PLAG1
			MSH5-SAPCD1	LRRC66	LINC01410
			ELMO1	TRIM46	RTKN
			AIG1	HHIPL1	TP53I13
			HIST2H2BE	RASSF10	SSPO
			ARHGAP12	ITPRIP	COPG2IT1
			MAP4K1	FUT1	PIP5K1B
			NKTR	ATP8B2	LYVE1
			SESN3	GAREM2	OBSL1
			JAK2	AFDN	LINC01160
			GOLGA8A	XIRP1	CTTNBP2
			CD84	HOMER1	CECR2
			CAPN3	ATP9B	CKB
			SLC25A45	PABPC4	LOC101928304
			TIA1	ADAMTS9	PKDCC
			LOC102724814	UPF1	SPTLC3
			PAN2	CD99L2	LPCAT2
			AANAT	SLC37A3	WASF2
			PCNX2	LOC100507346	PRRC2B
			SPNS3	LDOC1	GPRASP1
			INPPL1	FBXL7	INTU
			HLA-DOA	FBXO17	FAM122B
			CNPY3-GNMT	FLJ23867	ZNF333
			ZNF83	LOC100289656	GLI4
			TNFSF10	TESC	SLC12A4
			IVD	NET1	ZNF385C
			S100PBP	MOS	NCK2
			AGER	LINC00958	SH3TC1
			AMT	ZNF667.AS1	TENM4
			MUSTN1	SMAD3	NUDT16
			RPS10-NUDT3	MIR4257	CHKA
			TAF1C	C19orf38	SDK1
			AMY2B	NR4A1	CAPNS2
			IKBKB	DNER	C1QTNF3
			LOC101929497	EED	MXD4
			PLA2G4A	SYT3	AP4M1
			ITM2B	LHFPL2	AASS
			FCGR1CP	COQ8B	ADGRG1
			LINC01268	PCDHA9	LINC00893
			PARVG	LOC100128276	RPS6KL1
			SSH2	CDKN2A	LINC00578
			CACNB4	PCDHGB5	ABCG2
			ACAD11	GGNBP2	TMEM86B
			FLI1	SERTAD2	LRIG1
			TNRC6C-AS1	PCDHA11	SETBP1
			ARHGAP27P1	LINC02317	SLC25A29
			DEPTOR	CMYA5	HS3ST4
			SELL	PTPN13	DACT1
			PPWD1	A2M.AS1	LOC100289580
			REEP4	SLC2A10	APBB1IP
			DCAF8	TPST1	C19orf71
			CBX7	NAB2	KIF21B
			SAP25	MPDZ	NHSL1
			GALT	PCDHA10	LYL1
			FAM177B	GDAP1	PLEKHG4
			TPM2	SEMA6A	B4GALT4
			KIAA1147	RAPGEF1	TRAF5
			LTBP3	POFUT1	OSBPL6
			LINC01176	PCDHAC2	GP9
			MPPE1	MFSD11	SLC44A2
			PLA2G4B	PLCD1	BTBD19
			TTC17	CDKN1A	SLC2A5
			LOC401320	PCDHAC1	ANKRD18DP
			LOC728392	RD3	ARSG
			MYO18A	CNPY4	CARD14
			SOCS6	PDCD6IPP2	ENC1
			DDX17	TEX30	ARHGEF9
			FAM13A-AS1	RNF122	TMIGD2
			MTA1	PLXNA2	LOC100130298
			GIMAP8	KIRREL3	TMEM178B
			CAPS	LOC101929516	ANKMY1
			SPECC1	TDRD10	F2R
			RABGAP1L	PCLO	KCNA5
			TTC14	MINOS1.NBL1	NUMBL
			R3HDM2	NBL1	TANC1
			OPRL1	PCDHA7	ZNF251
			GATAD1	PIAS3	NCKAP5
			LDB1	BCAS4	ARHGAP32
			TMC8	AMH	SLC22A17
			SPSB3	CD34	LINC01091
			COL18A1	LIMD2	IL13RA1
			HLA-DPA1	PCDHA6	APBA1
			SIN3B	ADAMTS4	SIGLEC11
			SESN1	SKI	LIG1
			NFATC2	LIN28B	RFX3
			DPYSL2	GOLGA8M	ALDH5A1
			PCMTD2	SIPA1L2	FAM53B
			ZNF337	PCDHGA12	FOXP2
			CYTL1	SNPH	LOC101929719
			SPIDR	CLSTN1	LOC101929563
			PGM5	FOXO1	TMEM236
			MVB12B	B3GNT5	CPNE5
			RNF44	GPSM1	SFXN2
			OSBPL7	MIPOL1	LRRC14
			FAM13A	RPS6KA2	STMN3
			IGF1	MAGI1	TMC7
			SLC12A9	MAGI3	LOC100288123
			PAQR7	FAM160A2	SCHIP1
			FCGR1B	MIR378I	EFEMP2
			PRKACB	HACD1	KANK2
			NEK9	KDM6B	C4orf19
			RNPC3	SLIT2	FHOD1
			ATF6B	ITPKB	PRKD3
			TMEM156	FAM181B	ZNF711
			ARHGAP24	ANXA6	LOC100268168
			C1orf112	PCDHA12	PPM1J
			SAPCD1-AS1	PCDHA8	TSPAN7
			FGF20	MAP6D1	AHDC1
			ZFP36L1	ITM2C	IGIP
			FAM78A	PRICKLE2.AS1	PTPN14
			HLA-DRB5	MIR29B2CHG	RHOB
			OSGEP	PCDHA1	KBTBD11
			PCED1B-AS1	PNPLA2	RPPH1
			LENG9	PCDHA13	NPR2
			SAPCD1	ANGPTL8	PLPP7
			MAPK8IP3	CEP126	LOC105372273
			HEXDC	SUSD6	SLC25A27
			C2CD5	C1orf226	GLT1D1
			METTL17	USP2	ASTN1
			LOC105372397	GDF11	CTLA4
			TRO	CLN8	TPM1
			A2M	COL7A1	IRAK3
			CACNA1D	PCDHA3	SLC18A1
			NEK3	CCND2.AS1	CORO6
			SEC31B	ZCCHC12	HSD17B6
			S100Z	SMURF1	LOC100507156
			LETMD1	RASSF8.AS1	ENO4
			ATM	BCAR1	PELI2
			CENPT	KIAA1211	DUOX1
			RAPGEF6	TEK	ANKS6
			GRK2	TSPAN14	MMP28
			MRVI1	PCDHB3	TMEM119
			ZNF862	S100B	TMEM63C
			SERPINB9P1	ZNF300	SSBP2
			JMJD7-PLA2G4B	PCDHA2	CLDN3
			ZSCAN18	PLPP1	KCNIP1
			CDK5RAP3	PPP6R2	CYP27C1
			N4BP2L2	YES1	ARMCX4
			MKNK1-AS1	STAT5B	TTC28
			SENP7	PRKAG2.AS1	LOC101928058
			TUG1	KRTAP5.9	LRRC36
			BTN3A1	CSRNP1	CHCHD7
			CPED1	CLSTN3	HRC
			FAM212A	RASA3	MORN1
			TARBP1	MTCL1	GRIK5
			C12orf75	HES6	PHYHD1
			MRI1	CEP68	FAM163B
			SCARNA9	NFKBID	LOC148696
			TIAF1	INHBA	COL6A4P2
			DNMT3A	CRTC2	LINC01001
			RXRB	RAF1	LOC100128108
			ZNF266	SPATA18	ARHGEF37
			C1QTNF6	PIH1D1	LOC101929798
			CACNA1A	LINC01002	CYP2T1P
			DLEU7-AS1	PCIF1	SYCE2
			PLXDC1	MPZL1	GSTA4
			ZNF280D	ACOX3	POLN
			OFD1	GPR132	SYCP2L
			AGK	SLC9A8	SLC9A5
			SLC9A9	SLC37A1	SMYD3
			HDAC10	TNPO2	ZNF853
			PSRC1	OLFM2	PDK4
			SLC18B1	CSNK1G2	PPP1R3G
			TTC13	USP11	FGL1
			NFIA	LMBR1L	MEIS1
			RASL10A	POLE	EGR3
			LDLRAD4	SHMT1	AMOTL1
			TAZ	VPS37B	PSORS1C3
			XAF1	SLC9A3.AS1	DLG2
			TNK2	CDK9	CLUHP3
			NHLRC3	KCP	TNS2
			LILRA4	SNCA	FLJ34503
			VIPR1	USP4	ZNF391
			ABHD11	THUMPD2	LOC729683
			HTRA1	LOC105377342	LINC00484
			PBX2	ZFPM2.AS1	KCTD19
			DPEP2	SKIDA1	PTPRB
			SPPL2B	PCDH18	WHAMMP2
			ZSCAN30	IGFBP3	FAM157A
			ARHGEF40	UBE2E4P	LAMP5
			SLC25A25-AS1	C1RL	ADGRA2
			SPTLC2	RAMP1	LHFPL1
			FAM160B2	RAB39B	LINC00642
			GLCCI1	KLF3.AS1
			NCK1-AS1	RUSC2
			CYSLTR1	VAMP2
			NOXA1	KLHL18
			SH2B1	DOC2GP
			SUSD3	SGSM1
			SLC7A6	KRTAP5.8
			DOCK8	TMEM132E
			VMAC	PPP1R10
			ABHD15	MIR600HG
			M1AP	WDR91
			GLIPR1	NUP62CL
			ENGASE	PRKAG2
			DNAH1	SRSF2
			TNRC18	ORMDL3
			TMEM110	SLAIN1
			PTPRCAP	TTC9
			EVL	RINL
			IL11RA	VCL
			HHEX	UPF3B
			ATP8B4	PCDHA5
			RFX5	IDI2.AS1
			FLJ46906	RAB28
			STAG3L5P-PVRIG2P-PILRB	CELF2
			SLC1A3	ING5
			LRRC37A6P	PADI1
			DISC1	STRN3
			ZMYM6	MAPK10
			TSNAX-DISC1	RAB40C
			N4BP2L1	PROX1
			GATM	ELOVL6
			GHRL	PLPPR2
			EML1	OSM
			HLA-DRB1	IRAK2
			MAML3	LINC01770
			CRELD1	SNORD139
			NPHP3-ACAD11	TNKS1BP1
			SLC7A6OS	ERCC3
			NSUN5P2	ADAMTS6
			ZEB2-AS1	MAP4K4
			ARPC4-TTLL3	DLST
			ADGRG5	GUCY1A1
			CTSO	ABCB9
			CLEC17A	CNGA1
			KIAA1468	PCDHB9
			ALPK1	PDPN
			GDPD3	C1RL.AS1
			HLA-DPB1	NT5C
			PFKFB2	MOCS1
			GSDMB	MICALL2
			SP140L	ZDHHC3
			MEF2C	LYST
			ARHGAP33	KHNYN
			ZNF691	GABRB2
			C20orf96	NFAM1
			ADORA3	LOC100128882
			L3HYPDH	PRICKLE2
			SIRPB2	STK17A
			YTHDC2	SFXN5
			HDAC9	MYL9
			RBM5	DOLK
			MAMDC2	SLC27A3
			SLC39A10	NOTUM
			TRABD	FBXO27
			BTAF1	ASB1
			IL16	POMGNT1
			CROCCP2	BEX5
			PVRIG2P	ARHGEF10
			ZNF496	SNORA67
			PRMT7	ZFPM2
			TMEM39B	LRRC56
			SLC8A1	WDR37
			DHTKD1	ISM2
			CHST14	ABCA3
			SLC25A36	SEMA6A.AS1
			ID2	FAR2P2
			OGT	GAS2L2
			ST8SIA4	ZNF204P
			TBC1D2B	MLLT1
			SRGAP3	TMEM74
			LINC00174	KBTBD8
			ZDHHC14	TRAPPC9
			LPAR6	ACTG1P20
			FAM111A	LOC102723385
			RCOR3	BCL2L2
			P3H2	TSSK6
			DUSP7	HNRNPA0
			TLR6	TMIGD3
			LOC729737	ADGRL1
			FANCA	TRAF4
			IRAK4	SF1
			ATF7IP2	MAPK9
			HECTD2	PHKA1
			CD69	BCAS1
			PTGER4P2-CDK2AP2P2	ADD1
			TIGD4	SHROOM1
			CREB3L2	C12orf56
			ERP27	KIAA1324L
			PDE9A	PKD2
			ZNF160	WHAMMP3
			TBC1D12	KRTAP5.10
			BCO2	CDH23
			PPM1K	MEP1A
			GPD1L	NRCAM
			SH3RF3	PCBP3
			GAA	PCDHB4
			SNRNP70	MTA3
			CFAP74	SORT1
			HLA-DRA	AP3M2
			PPM1F	HSPB8
			PCDH12	PAQR6
			GNMT	CTDSP2
			ZNF618	IPO5P1
			QTRT1	CKAP4
			MDM4	GATAD2B
			ACBD4	C20orf27
			LOC101927069	TGIF2
			TMEM154	NOL9
			EGFL8	AFAP1
			ITGB2-AS1	MLXIP
			FOS	PEX5
			ZNF512B	RAPGEF2
			GALNT10	CCL22
			CDRT4	CX3CL1
			SKP2	HIC2
			ZNF700	YKT6
			LOC400043	FAM214B
			PARP8	KLF2
			TAGAP	ADRB1
			SPRY2	CHIC1
			TMEM147-AS1	LYNX1
			LRRC8C	MDM2
			PRPF38B	PURA
			SNORD3A	TGFBRAP1
			ICA1	KDM4B
			CNTRL	MMP19
			MYO7A	KBTBD11.OT1
			JAG2	ITPKC
			CHD7	HABP4
			NEIL1	ZDBF2
			TRMT1	SBF1
			CC2D2B	ERCC1
			CRHBP	CACTIN.AS1
			ZSCAN9	HECA
			CPVL	RAB3D
			ITIH4-AS1	VAV2
			FAM216A	RNF216
			LINC01089	PRRT3.AS1
			SATB1	SHC3
			HLA-DRB6	ARRDC2
			SNAI3	LOC100131604
			NREP	LINC00641
			MZF1	TRPM4
			RTTN	FLOT2
			SLC46A3	USP22
			PEX1	FBXO31
			PROX2	HNRNPDL
			PILRB	SYDE1
			ITPRIPL2	NCS1
			HIST2H2AC	ZSCAN23
			GNB4	IRF5
			PRAG1	LDLR
			RBMX	LOC101928126
			CELF2-AS1	TRPC4AP
			RGL4	MTCH1
			ABCD4	TMEM259
			GARNL3	QRICH1
			FAM118A	PIGO
			ITGAM	RAD54L2
			MIR646HG	C11orf95
			KLF3-AS1	ABCB11
			SLC29A3	ALDH16A1
			ULK2	EGR1
			C14orf37	FPGS
			OR52N4	PARM1
			GUSBP11	AIRE
			LOC105371925	LOC101928437
			HLA-DMA	PFN2
			NDRG2	PLEKHG1
			RERE	C1orf115
			ROBO3	BICC1
			TMEM168	SEC14L1P1
			TVP23C-CDRT4	PRNCR1
			OMA1	CGN
			RNF141	EML4
			D2HGDH	BEND5
			ARHGAP25	DHX30
			PPT2-EGFL8	TRIM72
			ATG14	KCNMB2.AS1
			IFI44L	MTMR3
			CNPY3	GSN.AS1
			SAMD9L	MIR6787
			SEMA4C	CPSF1
			MSI2	LOC100507373
			TRMT13	IMPG1
			WNT5B	CACTIN
			SRGAP2C	ATOH8
			ZNF652	MIR6502
			PGAP3	SUCNR1
			SRRM2	STK35
			PLA2G6	FSTL4
			KLHDC1	LOC101928000
			TMEM110-MUSTN1	DUSP15
			CCDC14	AKT2
			CELF6	NFIX
			TNFSF18	LYPD1
			IL18BP	SLC41A3
			LILRA1	UQCC1
			ASNS	OXGR1
			HYI	MECP2
			SUOX	PRDM11
			ARL5A	ENTPD4
			ZRANB2	ANKLE2
			ADHFE1	PRPF8
			RBMS2	SLC38A10
			WBSCR27	POLG
			SUZ12P1	PPP3CB
			APOBEC3G	MSL1
			FAM193B	VWA1
			LINC00865	DOK1
			HACD4	ADI1
			PRR12	NAT8L
			RASAL3	RCOR2
			GUCY1A3	MAGED2
			NSUN5P1	REXO1
			ANKRD22	IDI1
			MCCC1	MNT
			RASSF1-AS1	LINC01010
			ABCG1	ZMAT3
			PIK3R6	HGSNAT
			HIST2H2AB	FAM168B
			INPP5B	DIP2A.IT1
			DUT	SAP30
			HMGN3	ACTN2
			STAG3	NOTCH4
			SEC16B	EPM2A
			HLA-DMB	BRAT1
			FAM198A	EML3
			CABIN1	PIP4K2B
			ZNF514	CELF1
			IFI44	SPG7
			ARL5C	LOC101927497
			ZNF224	PRRT3
			ARHGAP15	LAMP1
			ELMO1-AS1	GTF3C2
			HIST1H2BD	DTX2
			HGF	RPA4
			TAGLN	OLFM4
			LOC100996455	NEAT1
			CHD9	ATP6V1G2.DDX39B
			ZFHX3	PTPRG
			IL6ST	DDX39B
			TFAP4	LOC100129534
			SLC29A1	FGD1
			LOC100505771	ASXL1
			NAIP	RNF138P1
			CLEC9A	PNKP
			MXRA8	MEIS3P1
			BATF3	MAN1A1
			PLB1	ADNP2
			GIMAP2	CBX6
			ITGA9	TEX9
			MICU3	CTGF
			MAP2K6	VPS51
			C20orf197	GAK
			ZNF449	SRSF11
			PRIMPOL	FUS
			RGS10	PTK2
			ZNF33A	TMEM108
			CDK3	EXTL3
			ZNF490	RILPL1
			ZNF559	PURG
			SIRT3	MC1R
			PRAM1	LOC101928120
			AHNAK2	OXR1
			BMP2K	SLC36A4
			VILL	RABEP2
			NOL4L	NLRP3
			APAF1	LOC100129046
			CAMK1D	EIF4A3
			DERL3	NIPAL1
			C9orf142	LOC103344931
			KLF7	ATP7B
			THTPA	RNF103
			LOC100132356	POFUT2
			TRIM34	SLC29A2
			RCBTB1	BAP1
			ZNF789	RBM33
			SNX18	DCAF6
			ACCS	NAA20
			LOC646471	SIRT1
			OTUD1	UBE2O
			GNAL	CDK13
			GPX7	PTCSC1
			UBR5-AS1	LINC00649
			ATP10D	REPS1
			BACE1	FNBP4
			DST	BAHD1
			INO80B-WBP1	TOX
			GIMAP1	WWC2
			FES	PDRG1
			RCN3	SNORD153
			C14orf159	C16orf72
			FFAR4	DENND5B
			ARHGAP4	MYOZ1
			ADAT2	IL6R
			PPOX	PINLYP
			LOC101929718	OGA
			NR2C1	VAPB
			MUM1	SOX9
			TRANK1	LOC101928143
			LOC100506639	PHF13
			SCRN2	GNL1
			LUC7L3	GMEB2
			RUNX2	CDH10
			ZNF117	SFSWAP
			TSSK3	TFPI
			WBP1	DLL1
			RNASEH2B-AS1	EPS8L3
			SGK494	PLXNA3
			GIMAP4	SNORD84
			SCNN1D	NDUFAF7
			SIDT2	RPS6KA1
			CREBZF	LOC100506548
			USP6	SLC28A1
			RUBCNL	DNAJC18
			PHOSPHO1	MALINC1
			DOC2A	FOXK1
			TATDN3	MARK2
			KIF26B	RUNX1
			PON2	AGO4
			PIDD1	RBM28
			SLC2A11	FKRP
			DHX58	ULK3
			ZNF609	PIP5K1A
			MBTD1	RUNX1.IT1
			C9orf106	CEP63
			HIVEP3	CTRL
			CARF	SENP6
			GIMAP6	NMT2
			XRCC3	SBF1P1
			HIST1H2AE	SNHG20
			PEX6	SUV39H1
			ALOX5	SMIM10L2A
			LOC100131289	EDN1
			SCYL3	PCDHB10
			DEF6	BCL9L
			HKR1	PRKACG
			HLA-DQB1	LMLN
			ANKS1A	PLAGL2
			SPATA13	FSBP
			TMOD2	JAKMIP3
			MTMR1	TMEM225B
			HLA-DQB1-AS1	FGFRL1
			ANK1	CASTOR2
			RNASET2	DPH1
			LMNTD2	RBM25
			HIST1H2BG	TLE4
			ATP2B4	SNORD10
			POLB	FASTK
			LOC153684	SCAF8
			SP110	C17orf107
			DNAJC10	ADAM22
			MIS18BP1	TM9SF4
			APCDD1	SNED1
			ADGRG6	AP5Z1
			PPP1R3E	CSNK1D
			IRF8	MIR3138
			NIPSNAP3B	CDKN2B.AS1
			NPHP4	ZXDC
			FCGR1A	PLCG1
			SPATA6	TAF6
			CD4	LDLRAD4.AS1
			KCNJ2	AMIGO1
			LOC730102	ASAH2B
			CATSPER2	TAF11
			ZNF506	AKAP8
			KCNMB1	RASL11B
			HEATR5B	LOC401478
			CCDC146	BTBD9
			INTS6L	CYP8B1
			PFAS	RNU5A.1
			PRKCQ	PCDHB5
			LOC102724596	MANSC1
			ZNF721	AGAP12P
			NYNRIN	FSTL5
			CBWD6	HSPA12A
			POLI	CCNL2
			TNFSF8	MIR4800
			GPC2	TMEM131
			TMEM86A	ZNF556
			RHOBTB1	JMJD4
			RN7SK	ISYNA1
			MRPL23-AS1	BTK
			KIR3DX1	FBL
			CAHM	KCNT1
			HACE1	ATP2A1
			ZNF595	LOC101927549
			DPY19L3
			ZNF23
			EPN2
			TMEM109
			C19orf54
			MRO
			PWAR5
			PCGF3
			TRPV1
			GTF2I
			SH3YL1
			PLEKHM1P1
			RNF125
			HMG20A
			LINC00671
			SYNGR1
			GAS6
			SERPINF2
			GSN-AS1
			F2RL1
			BTN3A3
			SOX12
			RUFY3
			TMEM268
			ATG16L2
			LAMB2P1
			MTERF4
			BAZ2B
			CCDC159
			RHOBTB2
			ECHDC2
			DXO
			ZNF641
			ZNF337-AS1
			TPCN1
			HIST1H4E
			PLD1
			LOC101926943
			CECR1
			ESRRB
			ERMARD
			SCARNA17
			LENG8-AS1
			MGEA5
			ZNF507
			LOC644794
			FKBP5
			JADE2
			TRIM52
			CEP192
			NOD1
			TCTEX1D4
			SLC5A2
			HSPBAP1
			RSRP1
			PMEPA1
			CFB
			LOC653160
			DOPEY1
			ENPP1
			TMEM260
			ZBTB18
			NEB
			U2AF1L4
			LRRC24
			ERV3-1
			C10orf131
			LOC100289511
			ZNF791
			OSBPL3
			MEF2B
			ZBTB14
			PRAP1
			LOC399715
			ADCK1
			LINC00987
			SRGAP2B
			PLAC8
			CD7
			ZNF302
			LIPC
			LINC00996
			MRC2
			INO80B
			PRKCA
			PRKAG2-AS1
			MAGEF1
			ZNF780B
			TSNARE1
			KRBOX4
			LINC00264
			GAPDHS
			HADH
			FAM228B
			LRIG2
			NPHP3
			DCAF16
			DFNB59
			ANXA2R
			IFT172
			SLC5A9
			LOC100652768
			TMOD1
			CHAD
			GPT
			KIZ
			LRFN1
			ZNF662
			ACAD10
			REC8
			TAMM41
			RFPL1
			NCMAP
			FRMD4B
			SCAND2P
			HCG22
			FCHO1
			ZC3H6
			GIMAP7
			KIAA1109
			CLEC7A
			NICN1
			LOC100379224
			MMP25-AS1
			ZNF767P
			MTURN
			COLQ
			RFPL1S
			ZMYM3
			LDLRAD4-AS1
			CLK4
			PRKAB1
			SLC15A4
			RFT1
			LINC01356
			LYSMD2
			TGFBR1
			SCLT1
			FAM72B
			LOC100240735
			SNORA53
			NEIL2
			SCARB1
			ZNF518A
			KCND1
			ANKRD24
			CAPRIN2
			PRR15L
			METAP1D
			SPATA20
			NME3
			ARMCX2
			ZNF397
			KCNAB3
			LINC01125
			JAK3
			ZNF562
			UVSSA
			LOC101928767
			PRR15
			PHKA2
			HPGDS
			POLG2
			DPH7
			ZCCHC11
			PPT2
			PICK1
			UNC5CL
			CTPS2
			NRIR
			WDR70
			TK2
			ABCA2
			ZNF577
			ZNF133
			FRS3
			IQSEC2
			ZBTB16
			PIWIL4
			MORC1
			HIST1H3A
			LINC01126
			PM20D1
			TP73-AS1
			POGLUT1
			LINC01664
			NSUN6
			CMAHP
			MAGEH1
			RBM5-AS1
			FAM157C
			DPYS
			VPS13C
			TSC22D3
			PAAF1
			MSANTD2
			TRMT10B
			CES4A
			LINC00260
			CAMKK1
			FOXN3-AS2
			GAREM1
			LINC00894
			TRIM6-TRIM34
			ZSCAN26
			BIN2
			SIGLEC14
			TRIM45
			FHIT
			FMO5
			MYCBP2
			GATS
			ZNF708
			ACRBP
			PPIL3
			FLYWCH1
			INAFM2
			SMIM5
			LOC101928068
			BMS1P4
			LOC102723703
			MRE11
			CECR6
			LOC101927751
			FAXDC2
			HSD17B3
			SCARNA12
			ADAMTSL4-AS1
			APOC4
			TAF1
			LINC00342
			C2CD2
			ZNF85
			SPAG8
			RAB40B
			NAV2
			CNNM3
			SEMA6D
			LOC401134
			SLC35A3
			IL18
			OVGP1
			GSE1
			LINC00173
			BEAN1-AS1
			DAAM1
			MAP2K5
			TTF2
			SLC16A8
			LINC01468
			ZNF839
			SLC25A35
			EXTL2
			ZNF439
			PRR22
			FAM135A
			TRIT1
			CTSF
			EP400NL
			HAUS5
			TMEM80
			LOC729218
			STK36
			ZNF18
			CCDC125
			TMEM9B-AS1
			ZNF189
			RAD52
			MRPS31P5
			PSMD5-AS1
			HMGB1
			PDE7A
			TYSND1
			CYBRD1
			NRIP1
			ZNF354B
			LOC221946
			PROS1
			PROCA1
			TSPAN32
			ZNF37BP
			ZNF431
			C6orf163
			PEBP4
			TNFRSF6B
			KDELC2
			MPHOSPH9
			RWDD3
			BAIAP2L2
			ICAM2
			KIAA1683
			WDPCP
			ZMYND15
			CD1D
			YPEL1
			ZNF816-ZNF321P
			ZNF254
			LINC01907
			PDCL3P4
			TCTN1
			HLA-DQB2
			RASSF4
			ZNF445
			ARHGAP8
			ANKRA2
			MLC1
			LOC100049716
			HLA-DQA1
			AOAH-IT1
			RECQL5
			FUT4
			ICE2
			CEBPA-AS1
			CHTF18
			FBF1
			MED13L
			IKZF2
			PRRG4
			OSGEPL1
			ZNF321P
			LINC00539
			CXCR2
			L3MBTL4
			2025-03-01
			RPGRIP1
			SIDT1
			ANP32A-IT1
			DNHD1
			CCNB1IP1
			TMEM209
			ZNF469
			YPEL3
			ITGA9-AS1
			HEMK1
			GABPB1-AS1
			LOC100131347
			RPS27
			PGM5P2
			RFX3-AS1
			PAK6
			ZNF292
			MKS1
			LOC645513
			CHST10
			HLTF
			ZFP90
			PWARSN
			OSGEPL1-AS1
			OLMALINC
			FAM159A
			C10orf10
			LINC00663
			HCG11
			LKAAEAR1
			GBP4
			CCDC180
			USP20
			ZDHHC19
			TOM1L2
			GCA
			PNPLA7
			FAM117B
			BORCS8-MEF2B
			WIPF3
			ENTPD1-AS1
			ABAT
			ZFP62
			ANKS1B
			ATP7A
			CLDN9
			PPARGC1B
			UBN2
			LOC101929117
			CHEK2
			SMAD7
			TUBGCP5
			TBC1D10C
			EFHC1
			RPL23AP64
			IGSF22
			CELSR2
			TTN-AS1
			B9D1
			TMEM120B
			ZNF621
			HCG8
			ROBO4
			TSPOAP1
			RASL11A
			ZNF680
			CEACAM4
			ZNF248
			ZNF211
			DBP
			FAM229A
			RMRP
			YPEL2
			ANKS3
			ZNF404
			ANKRD44-IT1
			ALDH6A1
			SPATA25
			AGAP9
			POC5
			GAB1
			LINC01000
			ABCA11P
			RAB33B
			L3MBTL1
			FCGR2C
			APOBEC3F
			ZNF671
			BTN3A2
			GPR155
			STARD4-AS1
			LINC00969
			EFCAB7
			CEBPA
			LINCR-0001
			GRK5
			PPP1R32
			WDR27
			SMAD6
			OAS1
			ERAP2
			JAZF1
			ZNF138
			DICER1-AS1
			DRD4
			KLHL3
			ITPR2
			TSPYL5
			SDHAP3
			ANKRD36
			CLDN4
			ZNF491
			C12orf76
			ZCWPW1
			LOC100499484-C9ORF174
			MTAP
			CYP2D6
			LOC101927865
			C9orf66
			LOC101927911
			COL15A1
			TMEM91
			TNFRSF10C
			C10orf25
			BNC2
			ERVK13-1
			RGS16
			SKIL
			PHKA2-AS1
			ELAVL4
			B4GAT1
			CDH13
			IQCJ-SCHIP1
			ARMC12
			LOC100128288
			TRIM66
			NPY1R
			KCNAB1
			SEPSECS
			SH3RF3-AS1
			MEGF6
			GHRLOS
			MMP11
			LOC101928595
			TSPYL4
			TMEM8B
			ARMC4P1
			HCG26
			FBXL20
			UNC5B
			HERC2P2
			SNHG9
			KRBA2
			HSD17B7P2
			CLDN15
			PDGFC
			IFT80
			LOC101928020
			LOC100130548
			LINC01909
			RAD51-AS1
			LOC100287497
			MNDA
			ATP8A1
			HESX1
			EXPH5
			LRRK2
			ZDHHC21
			ADCY10P1
			ARHGAP20
			ZNF660
			AUTS2
			GNLY
			EDA2R
			FBXO44
			LINC00399
			ADGRD1
			SETD4
			NIPAL3
			LOC101929829
			GANC
			CRYGS
			LINC00672
			LOC648987
			KLRA1P
			HERPUD1
			APOBEC3D
			LOC642852
			ZNF253
			SLC26A1
			USP32P1
			EBLN2
			SEMA3B-AS1
			ANKRD36C
			HIST1H3D
			ABHD18
			LOC101927391
			MST1
			BRICD5
			FAM69A
			AUH
			KIAA0513
			KLC4
			BCAS3
			STK32B
			TMEM143
			ZNF766
			PRUNE2
			ADM5
			ZNF41
			STIM2
			RGS1
			CDH26
			RABL2A
			FKTN
			PIK3C2B
			TMOD4
			NLRP6
			SLC24A4
			UTRN
			ALOX15B
			AKAP7
			ABTB1
			ZFP3
			IER2
			HPN
			TSSK4
			ZNF177
			TXNDC16
			BTG2
			ZNF69
			LOC339059
			UCN
			TMEM220
			BACE1-AS
			RPL21
			TMPRSS4-AS1
			RRP7BP
			STAG3L5P
			ELMO3
			LOC100287896
			ASIC3
			LINC00921
			CYP2U1
			WDR5B
			LOC100133331
			KCNG2
			LY86
			SNAP25
			AGMAT
			CTD-2270F17.1
			APOBEC3H
			NALT1
			NUDT17
			FIRRE
			FAM221A
			ANGPTL6
			LOC103611081
			ADAM1A
			C1orf228
			SNORA74B
			PPIP5K1
			GUSBP1
			POU5F1P3
			SLC25A12
			RFX7
			EPSTI1
			SCARF2
			MOV10L1
			TFDP2
			NUP210
			CNTNAP2
			WBP2NL
			EIF1AX-AS1
			LOC642846
			ACAP1
			BTN2A2
			RDH16
			GABPB2
			POMK
			HIST1H2AD
			ZBTB44
			CCDC183
			GAPT
			LMO7
			C11orf45
			SRGAP2-AS1
			PYROXD2
			LINC00899
			CREB3L4
			TBC1D32
			C6orf226
			SCART1
			FLJ32255
			SCAPER
			TAS2R5
			ZBTB37
			TCP11L2
			CHN2
			ZFP69
			WDFY3-AS2
			LOC91450
			GUSBP4
			FRG1HP
			NBPF1
			PRR34
			KLHL6-AS1
			AIFM3
			SMPD3
			SPIN3
			C16orf86
			EGR2
			KCNIP4
			NLRP4
			GSTM5
			PMS2P1
			ZNF493
			ASPDH
			SEPT7P2
			AVPR2
			SLC35E2
			DYX1C1
			THSD1
			ACP6
			LOC102724919
			ZNF714
			LOC101928324
			TRPM2-AS
			LINC00938
			PASK
			ATXN7L1
			CMTM2
			RNA28S5
			LINC00265
			CDNF
			RAPGEF3
			LOC100996255
			TTC32
			LOC100506476
			PARP3
			JUN
			2025-03-03
			MAMDC4
			TBX19
			P2RX5
			PDCD4-AS1
			CNIH2
			LOC401261
			GCNT2
			SUMO4
			ZNF586
			LOC646762
			CLEC2D
			TMEM254-AS1
			FKSG29
			LOC100507487
			LIPM
			DUSP27
			LINC00565
			LOC105369438
			UBE2CP5
			SNX32
			LHPP
			C12orf66
			GALNT12
			ZNF559-ZNF177
			LIPT1
			SUPT3H
			ZNF107
			CBWD5
			HLA-DQA2
			B3GNTL1
			FBXW8
			MEF2C-AS1
			CH25H
			HIST1H2AM
			FAM53B-AS1
			CCNG2
			POPDC2
			SNHG11
			LOC100288778
			LINC01061
			HERC2P9
			ATR
			CAND2
			RNF150
			RALGPS1
			ZNF345
			ZNF785
			ZNF154
			BBS10
			PCSK4
			ZNF30
			LOC102724163
			PANO1
			LINC00920
			KLHL33
			ZNF541
			PRTFDC1
			F13A1
			TRAPPC2
			C8orf44
			RBM43
			CDHR5
			HIST1H1D
			AFF3
			PATL2
			ADAMTS13
			BIVM
			LINC00926
			MMP25
			BUB1B-PAK6
			ZNF528
			ERI3-IT1
			HIST1H2BF
			SLFN13
			LOC101929574
			LOC100289230
			ZBP1
			BCKDHB
			LOC102725254
			ACTG1P4
			CD300LF
			CCHCR1
			LTBP4
			CD81-AS1
			LOC101929882
			CCDC191
			RFPL3S
			N4BP2L2-IT2
			SERPINE1
			ZNF717
			FAM72A
			FBXO36
			HCP5
			LANCL1
			CHSY3
			C19orf57
			TTC8
			LINC00854
			BVES-AS1
			ZIK1
			TEX22
			BMS1P5
			GFAP
			SYCP2
			CC2D2A
			ZFP14
			CALCR
			C5orf56
			ZNF619
			TAPT1-AS1
			PARP15
			PDXDC2P
			ZNF763
			LOC100130950
			TMEM252
			UCKL1-AS1
			LOC254896
			BICD1
			RPS6KA2-AS1
			SPTBN1
			ERC2
			EFCAB13
			UHRF1
			CASS4
			IPW
			FUT10
			NAV2-AS2
			TNFSF13B
			WDR90
			LOC202181
			WASHC1
			MCEE
			MTX3
			TMEM229B
			ZNF91
			HIST1H4I
			TRIM50
			CSNK1G2-AS1
			OR3A2
			SULT1C4
			TBC1D22A-AS1
			HSD17B8
			LINC00892
			LINC01590
			ALKBH8
			CD5L
			NSUN7
			TMEM178A
			CCDC154
			ICK
			PRR5-ARHGAP8
			ZNF573
			PPIEL
			DOCK4-AS1
			ZNF546
			C14orf93
			PTTG2
			ZNF141
			NPIPB5
			LOC100507634
			MIR99AHG
			RSAD2
			NEURL2
			GOLGA2P5
			LOC105378614
			SPAG6
			NRGN
			FOXP1
			CCDC188
			TTC12
			LINC01645
			PIK3IP1-AS1
			ZKSCAN3
			ZNF776
			FN3K
			GPR137C
			LOC344967
			WFIKKN1
			CTF1
			KLF4
			C11orf65
			SRPK3
			ABHD11-AS1
			LOC105371433
			LOC102725126
			ITIH5
			SKOR1
			MS4A6A
			ZSCAN31
			LINC01220
			APOC1P1
			CCT6B
			LOC400927
			LINC01252
			LOC101928307
			PI4KAP1
			DZIP1L
			RNA45S5
			LINC01546
			FLJ10038
			ASPRV1
			NNAT
			GCFC2
			WDR35
			TNNI3K
			LMLN-AS1
			ALDH1A3
			CEP41
			APOL6
			REPS2
			ZNF550
			ZNF70
			LOC100294362
			MTERF2
			FAM120C
			LOC102724552
			HIST1H1E
			DHODH
			DCST2
			HIST1H2BN
			LINC01150
			ZRANB2-AS1
			KRTAP5-10
			ACTA2-AS1
			ZNF137P
			EPHB6
			TNRC18P1
			C1S
			LOC100507557
			TTN
			GEMIN8P4
			ZNF678
			S100A1
			LOC102723335
			TAS2R19
			HSF4
			OR3A1
			ERMN
			LOC100507547
			LYSMD1
			GUSBP9
			ACPP
			LRRC39
			USP32P2
			AGAP5
			SEMA6A-AS1
			ZKSCAN4
			LRRC27
			ZNF43
			TBCK
			C9orf84
			ZNF544
			PIBF1
			IL1RAP
			LOC102724265
			MYO16-AS1
			CLEC19A
			CROCCP3
			USP30
			MSS51
			TMEM56-RWDD3
			IQCC
			NRN1L
			TMEM231
			LOC105376805
			SMG1P7
			ZNF90
			MIR181A2HG
			FOSB
			EDNRB-AS1
			LOC644285
			ANKAR
			DLGAP4-AS1
			CD160
			MROH6
			ZNF471
			MYC
			ABHD12B
			LRRC70
			SCRN3
			DISC2
			PRICKLE4
			IER5
			ZNRF2P2
			LOC339666
			ZNF626
			LOC728743
			LOC100505716
			C2orf88
			KCNJ2-AS1
			SELENOP
			IFT140
			ATP2B1-AS1
			KYAT1
			RBM12B-AS1
			ZNF737
			LOC105378367
			CEP44
			PTPRN2
			SENCR
			ZSCAN2
			H1FNT
			RDH5
			LOC101927365
			RFXAP
			GDPD4
			C19orf18
			GUCA1B
			RNASE3
			PLCL1
			ST3GAL3
			ZFP28
			KIAA1107
			LOC100499484
			MST1P2
			ZNF891
			ZSCAN12
			IFITM2
			WDR88
			GTF2IRD2B
			SCAI
			ASGR2
			DZIP3
			CLDND2
			LRRC17
			DEGS2
			LOC102723582
			PDGFB
			CCDC152
			NUAK2
			IFIT2
			PCP2
			DDX60
			C15orf62
			C15orf41
			PAPOLG
			GPM6B
			LOC100130992
			LOC285626
			GRIN3B
			ZNF34
			ZNF484
			KIF20B
			CACNA1F
			GCNT7
			ALG6
			LOC100506691
			CLHC1
			LINC00852
			WWOX
			LGR4
			LOC171391
			PEX3
			INTS6-AS1
			A2M-AS1
			CACNB2
			NBPF8
			CKMT2-AS1
			KCNMB4
			AVIL
			LOC101927905
			MACROD1
			AK9
			ADRA2C
			CDKN2B-AS1
			MAP9
			CBR3-AS1
			FKBP10
			SPIN4
			HLA-F
			HIST1H2BC
			DCLRE1CP1
			PCF11-AS1
			PLEKHH1
			ETAA1
			LOC100996419
			DCDC2B
			LOC101928617
			LINC00441
			INSR

## Sheet: 1.7 Fig2m_venn diagram
Table 1.7	Fig2m_venn diagram		Unique genes in Gosselin et al 2017 (2001)	Unique genes in up_CD34_monocytes_CNS (986)	Overlapping genes (71)
List of genes corresponding to the Venn diagram in Figure 2m, including genes upregulated in Gosselin et al. (2017), genes increased in CD34/monocytes engrafted cells in the CNS, and the overlapping genes			CSF3R	PLXNC1	AXL
			CX3CR1	CD38	CD74
			C3	DNAJC15	MGAT4A
			PALD1	CD200R1	SLC40A1
			SORL1	LOC100506098	FGL2
			PLD4	TMEM26	CXCL12
			P2RY13	DAPK1	TNFSF10
			SIGLEC10	LGALS3	SELL
			ENTPD1	SASH1	RABGAP1L
			GSTM2	MCTP1	PRKACB
			CSF1R	LRRC61	BTN3A1
			SIGLEC8	ACTN1	PLXDC1
			P2RY12	HS3ST3B1	XAF1
			GAL3ST4	ANXA1	ADGRG5
			SLCO2B1	PRSS36	SRGAP3
			ST6GAL1	TGFBI	ZNF618
			MEF2A	FCGBP	TMEM154
			VASH1	CD44	CRHBP
			ARGLU1	HSH2D	SAMD9L
			KAT2A	CHCHD2	LILRA1
			AOAH	GAPLINC	HACD4
			EPB41L2	GNG12	IFI44
			ARHGEF6	MBP	ARHGAP15
			UBA7	KITLG	HGF
			RASGEF1C	MMP13	ZNF559
			TRIM22	ACVRL1	ADGRG6
			DENND3	ACP5	ZNF506
			METTL7A	CERKL	BTN3A3
			LOC100129083	CCDC170	OSBPL3
			TMEM173	LINC01146	PLAC8
			FGD2	NEURL3	FRMD4B
			TLR7	ANXA2	GIMAP7
			GPR34	ITGA4	CMAHP
			PLXDC2	ZNF568	FAXDC2
			LOC100506603	FRG1EP	CD1D
			LOC100507006	RASGRP3	CXCR2
			CD302	FGD5	GBP4
			STX16	IQGAP2	BTN3A2
			PGGHG	LAMB2	ERAP2
			ADAM28	GCNT1	TSPYL5
			PLVAP	ANXA2P2	UNC5B
			LINC01736	ZNF366	HSD17B7P2
			MLXIPL	TACC3	HESX1
			INPP5D	ZNF572	APOBEC3D
			APPL2	CLDN1	STK32B
			GNG7	CRYBG1	UTRN
			SRGAP2	SPIRE1	ZFP3
			FYB	DUSP6	EPSTI1
			SYNDIG1	APOL3	BTN2A2
			TREML1	SESTD1	GAPT
			SFMBT2	DRAM1	RNF150
			PLCB2	CD48	PRTFDC1
			ADAMTSL2	ARHGAP18	F13A1
			CCDC88B	TSHZ3	HIST1H1D
			CARD9	MICAL2	ZNF528
			LPAR5	TSPAN4	SLFN13
			SIPA1	VAV3	ZBP1
			TTLL3	MIR4761	CD300LF
			ADCY7	MYO5A	HCP5
			TM6SF1	RALGDS	CALCR
			GAB3	MELTF	C5orf56
			KIAA0141	WTAPP1	LOC100130950
			RHBDF2	ARL4C	TNFSF13B
			TLR5	NAALADL1	WASHC1
			LTC4S	HK3	TMEM229B
			STX16-NPEPL1	HOXB4	MS4A6A
			PNISR	CCDC102A	USP32P2
			LY75-CD302	CRTC3	SELENOP
			GAS6-AS1	SEMA4B	CCDC152
			FAM105A	CDR2	IFIT2
			KCNC3	LGI2	DDX60
			TAL1	TMEM26.AS1
			ARHGAP27P1-BPTFP1-KPNA2P3	GNPDA1
			RNF166	MIR155HG
			SPNS2	POMC
			ARHGAP27	SNTB2
			ACSM5	VIM.AS1
			CARD11	DPYD.AS1
			MYO15B	CARD16
			PCED1B	ITGAD
			TBXAS1	CDCA7L
			SLC15A2	PRR5L
			CSGALNACT1	PTPN22
			PLAGL1	DNAH11
			LRMP	LOC105374454
			VSIR	VIM
			OLFML3	DENND2D
			ACSS1	ME1
			NLRP1	ASRGL1
			ERMAP	CNIH3
			MERTK	ST7
			TIAM1	VANGL1
			AZIN2	GPRC5B
			ACY3	RPP25
			RYR1	EPAS1
			PSMA3-AS1	SMAD1.AS1
			IGSF21	MDFIC
			BLNK	DUSP10
			KCNQ3	RTN1
			DAGLB	CD109
			LOXL3	BCL2
			ADAMTS10	PECAM1
			GPCPD1	SLC38A6
			IKZF1	PDE7B
			NAA40	ZNF257
			ZNF362	BRI3
			CIITA	RHPN1
			ZFP36L2	GAS2L3
			ZMAT1	CD80
			LRRC4	SMPDL3A
			SRSF5	MMP15
			TBC1D4	MCOLN2
			PCED1A	MIR4458HG
			SEMA4D	CALHM6
			EMB	RRN3P1
			PKN2	FLNB
			SMAP2	LILRB1
			STAMBPL1	FAM24B.CUZD1
			SALL1	GCLC
			DMTF1	SEL1L3
			RCSD1	TMEM150B
			NAPSB	GNG11
			PABPC1L	ST14
			LPAR2	RAB42
			TLR10	CAMK1
			MKNK1	S1PR2
			ARHGEF1	RRAGD
			MTHFD1L	ZNF835
			GGTA1P	SCAMP5
			RPS6KA4	LDB2
			PHYKPL	ABCC3
			NAV3	FXYD6
			LINC01480	PPM1H
			TNFRSF25	CSRP1
			TLR3	CXCR2P1
			PLEKHG5	TRIM47
			TNFRSF13C	JHY
			ZNF276	ANTXR2
			MAN2C1	KIAA1958
			NPEPL1	ESR1
			RGL2	GALC
			FMNL3	TNFAIP8
			MAF	FOXRED2
			IDUA	CLEC12A.AS1
			SELPLG	GRAMD4
			PAQR8	NLN
			MSH5	SLAMF7
			PRPF40B	RAP2B
			ITIH4	FECH
			AHSA2	IGFBP4
			CCDC18-AS1	ADGRE1
			CSAD	CCL5
			PCYOX1L	GRM1
			DKFZP586I1420	NRP1
			LRRK1	PLBD1
			INTS3	SDSL
			MMRN1	MPEG1
			LENG8	CD300E
			ANKRD44	MIR4315.1
			TMEM175	MIR4315.2
			ALG13	SNX24
			RGS18	GPNMB
			IFNGR1	KLHDC7B
			MSH5-SAPCD1	CISD2
			ELMO1	ADAMDEC1
			AIG1	DOCK1
			HIST2H2BE	TMEM144
			FRMD4A	OPTN
			COL8A2	IDO1
			ARHGAP12	TMEM51
			MAP4K1	CUZD1
			NKTR	PAPSS2
			SESN3	TNFAIP2
			JAK2	ARHGAP10
			GOLGA8A	HRH1
			CD84	LACC1
			MCF2L	SLC39A8
			CAPN3	CHST13
			NUDT3	CALHM2
			SLC25A45	LILRA2
			TIA1	CRTAM
			LOC102724814	COMT
			ADRB2	CREB5
			PAN2	TNFSF15
			AANAT	GALM
			PCNX2	SOBP
			SPNS3	KATNAL1
			INPPL1	ZNF229
			HLA-DOA	LITAF
			CNPY3-GNMT	HERC5
			MEST	FPR3
			ZNF83	GBP3
			PMS1	TEC
			IVD	PCBD1
			ZNF846	AURKA
			S100PBP	SERINC5
			AGER	CDC42BPA
			AMT	HSD17B4
			MUSTN1	RHPN2
			RPS10-NUDT3	TRPS1
			TAF1C	NUSAP1
			AMY2B	CHURC1.FNTB
			IKBKB	ZNF829
			LOC101929497	RNASE1
			PLA2G4A	MS4A4A
			ITM2B	MS4A4E
			FCGR1CP	SMAD1
			LINC01268	MFHAS1
			PARVG	STX2
			SSH2	MS4A14
			CACNB4	GPC4
			ACAD11	CACNA2D3
			FLI1	AGAP2
			TNRC6C-AS1	EYA2
			ARHGAP27P1	IQGAP1
			DEPTOR	LOC107985544
			FAM166B	PMP22
			RASGRP2	CASP7
			PPWD1	MCC
			PIEZO1	PLAU
			REEP4	ZNF350
			DCAF8	SDS
			CBX7	CXCL11
			SAP25	MS4A7
			GALT	DNAJC5B
			FAM177B	SLC30A4
			TPM2	KCNAB2
			COL9A2	PIP4P2
			KIAA1147	SLC25A24
			LTBP3	MCM10
			LINC01176	PPFIBP1
			MPPE1	RNF144A
			RECK	HOXB6
			ARRDC5	ZDHHC18
			RIN2	GBP5
			PLA2G4B	PSTPIP1
			TTC17	SCIMP
			PLAT	SECTM1
			LOC401320	URB1.AS1
			LOC728392	LAMP3
			MYO18A	TENT5A
			SOCS6	SKA1
			DDX17	GPR65
			FAM13A-AS1	LRRFIP1
			MTA1	STARD13
			GIMAP8	SLC25A43
			ACKR2	VSIG10
			CAPS	SPG21
			CYTH3	HRNR
			SPECC1	CD6
			TTC14	FAM213B
			R3HDM2	AHR
			OPRL1	SAMD4A
			GATAD1	MRAS
			LDB1	GOT1
			RAP1GAP2	FNBP1
			TMC8	LOC100506321
			SPSB3	BCL7A
			COL18A1	CPT1A
			HLA-DPA1	KCTD1
			SIN3B	LDLRAD3
			SESN1	ZNF880
			C16orf58	IGF2BP3
			TUBGCP6	TRIM6
			NFATC2	LOC101927070
			EMID1	KMO
			DPYSL2	CCNB1
			PCMTD2	PBX3
			ZNF337	TRIM14
			MAST3	SDC2
			CYTL1	PRLR
			SPIDR	C1orf21
			PATZ1	CAMTA1
			PGM5	ARRDC4
			MVB12B	SLCO3A1
			RNF44	TNFRSF14
			DGKA	DMD
			OSBPL7	S100A4
			FAM13A	MROH7
			IGF1	CPAMD8
			SLC12A9	C1orf127
			PIK3IP1	BUB1
			PAQR7	CD209
			FCGR1B	SNN
			NEK9	BATF2
			RNPC3	GPX3
			ATF6B	S1PR1
			ZASP	RHNO1
			TMEM156	ZNF804A
			ARHGAP24	CTSD
			C1orf112	PHACTR2
			CIRBP	IQCD
			SAPCD1-AS1	ABCA5
			FGF20	CPNE8
			ZFP36L1	TAF4B
			FAM78A	TMEM123
			HLA-DRB5	APOL1
			OSGEP	LILRB2
			GALNT2	SIGLEC1
			PCED1B-AS1	ENDOD1
			LENG9	SLC46A1
			BIN1	RSPH3
			SAPCD1	TRIB2
			MAPK8IP3	SGTB
			RGL3	DOCK5
			HEXDC	ACKR3
			C2CD5	H2AFY2
			METTL17	FHAD1
			LOC105372397	IFIH1
			TRO	NUPR1
			A2M	SGPL1
			CACNA1D	LGALS1
			NEK3	HS3ST1
			SEC31B	RTP4
			GGT7	B3GALNT1
			S100Z	HOXB.AS1
			LETMD1	BTN2A3P
			ATM	RAD51AP1
			CENPT	CSGALNACT2
			RAPGEF6	NR1H3
			WDFY2	KCNC4
			KBTBD12	OTOA
			GRK2	LAG3
			MRVI1	KLRF1
			ARRDC1	TESPA1
			SERPINF1	FGD6
			FAM149A	ASCL2
			ZNF862	TRIM59
			SERPINB9P1	EIF4E3
			JMJD7-PLA2G4B	CENPE
			MIGA2	EVC
			ZSCAN18	LOC101927243
			CDK5RAP3	GPRIN3
			N4BP2L2	CCSER1
			MKNK1-AS1	OTOF
			SENP7	POTEE
			TUG1	MAFB
			CPED1	SIPA1L1
			FAM212A	LILRB5
			TARBP1	LBX2.AS1
			C12orf75	FAM218A
			MRI1	SERPING1
			IGSF10	IL2RA
			SCARNA9	RUNX3
			TIAF1	PLA2G16
			TGFBR2	NCF1
			DNMT3A	HLA.DPA1
			RXRB	SLX1A
			EXD3	SLX1B
			ZNF266	GSAP
			CCDC84	BLVRB
			C1QTNF6	FKBP9
			CACNA1A	RASGEF1B
			DLEU7-AS1	CEP83
			LRCH4	OPN3
			NRBP2	TMCO4
			ZNF280D	KLRC4.KLRK1
			OFD1	TXK
			AGK	SLC6A6
			SLC9A9	CENPA
			CEACAM21	ARMT1
			ORMDL1	PRRG1
			HDAC10	NCF1C
			ABCC4	RARA
			IPCEF1	SEMA4F
			PSRC1	ESCO2
			SLC18B1	DIRC3
			LCAT	LOC102723753
			TTC13	CORO2A
			NFIA	SLC38A5
			RASL10A	HLA.DRB1
			LDLRAD4	TGFB2
			TAZ	EPHB2
			TNK2	ADD3
			NHLRC3	IQCK
			LILRA4	SLC22A5
			VIPR1	SLFN11
			ABHD11	FTL
			JAM2	BHLHE40
			HTRA1	KCTD15
			PBX2	DENND1B
			DPEP2	AP1S2
			ST6GALNAC3	MYO10
			SPPL2B	ZNF382
			ZSCAN30	FABP3
			ARHGEF40	TRIM61
			SLC25A25-AS1	C10orf55
			SPTLC2	ECT2
			FAM160B2	C9orf139
			GLCCI1	ANAPC13
			LOC155060	ABHD6
			NCK1-AS1	ZNF285
			CYSLTR1	PKD2L1
			NOXA1	C15orf38.AP3S2
			SH2B1	MMP14
			PACS2	ATP1B3
			SUSD3	CXCL10
			SLC7A6	CADM1
			DOCK8	EDNRB
			VMAC	PTER
			ABHD15	NRP2
			M1AP	CXCL9
			GLIPR1	CCDC144B
			ENGASE	BLVRA
			DNAH1	CD14
			TNRC18	FNTB
			TMEM110	CLDN12
			PTPRCAP	MITF
			EVL	MAP3K21
			IL11RA	IRF4
			HHEX	SMC4
			ATP8B4	GPR141
			RFX5	CLIC4
			FLJ46906	PARVB
			LINC01141	KLRK1
			STAG3L5P-PVRIG2P-PILRB	UQCC2
			MSLN	RUFY4
			SLC1A3	SLFN5
			LRRC37A6P	HOXB3
			DISC1	TCHH
			ZMYM6	ANKRD29
			TSNAX-DISC1	ROR1
			N4BP2L1	SNRPC
			GATM	GLYATL1
			PAN3	GLB1L
			PIGL	KIF15
			EPOR	MAPK13
			GHRL	GVINP1
			EML1	CEP55
			HLA-DRB1	ATG7
			OXER1	TDRKH
			HAAO	ARMCX1
			MAML3	ST3GAL5
			CRELD1	ZNF114
			NPHP3-ACAD11	KLHDC8B
			SLC7A6OS	KIF13A
			NSUN5P2	SAMD9
			ZEB2-AS1	HERC2P4
			ARPC4-TTLL3	HLA.DQB1
			CTSO	SARM1
			CLEC17A	ABLIM3
			KIAA1468	MGC12916
			ALPK1	LOC101928123
			GDPD3	GNS
			SLC25A37	LGALS3BP
			HLA-DPB1	CENPF
			MED12L	LILRA5
			PFKFB2	SYNE1
			TLN2	NPC2
			GSDMB	KIR2DL4
			SP140L	P4HA2
			MEF2C	TMEM37
			ARHGAP33	SPTA1
			ZNF691	ASAP1
			C20orf96	CCNB2
			ADORA3	SNX9
			L3HYPDH	ST18
			SIRPB2	RAB11FIP1
			POLM	OSBPL1A
			YTHDC2	AMDHD1
			LY6G5B	DSE
			HDAC9	LINC01094
			RBM5	NT5C3A
			MAMDC2	CLEC2B
			SLC39A10	BHLHE40.AS1
			TRABD	CCR6
			BTAF1	NDRG1
			IL16	NABP2
			CROCCP2	MACC1
			CD3EAP	MLPH
			PVRIG2P	GPR82
			ZNF496	AKR1E2
			PRMT7	HLA.DPB1
			TMEM39B	PRKAR2B
			SLC8A1	NHS
			DHTKD1	PTPRO
			CHST14	ASPH
			KIAA1211L	TAGLN2
			SLC25A36	ZNF585B
			ID2	CR1L
			OGT	LINC00900
			INTS10	WWP1
			ST8SIA4	DPYD
			TBC1D2B	PGM1
			LINC00174	HLA.DQA1
			ZDHHC14	SLC22A15
			LPAR6	FRG1JP
			FAM111A	HIST2H2BF
			RCOR3	HLA.DQB1.AS1
			P3H2	CD163
			AMOT	HLA.B
			DUSP7	HLA.DMA
			SUN1	CD101
			TLR6	ERAP1
			LOC729737	VTI1B
			CITED4	CKAP2L
			FANCA	NECAP2
			BHLHE41	KLRC1
			IRAK4	LOC101927322
			ATF7IP2	KCNA3
			HECTD2	ABCC5
			CD69	CEPT1
			PTGER4P2-CDK2AP2P2	PLEK2
			TIGD4	PTPN20
			CREB3L2	F11R
			BRINP2	ALDH1A1
			ERP27	ARG2
			GSTM4	LRFN4
			PDE9A	WASHC2A
			ZNF160	LOC101927151
			TBC1D12	TANC2
			BCO2	SPATS2L
			PPM1K	LOC100506585
			GPD1L	SEMA4A
			SH3RF3	IFNAR1
			GAA	MMP12
			SNRNP70	SMS
			CFAP74	PAX8
			HLA-DRA	CD93
			PPM1F	TICAM2
			MIR503HG	PRDX1
			PCDH12	LINC02328
			GNMT	VENTX
			QTRT1	TNFRSF14.AS1
			MDM4	ADAP2
			ACBD4	SLC2A9
			LOC101927069	CDC20
			EGFL8	ST3GAL4
			ITGB2-AS1	PRICKLE1
			TCEA2	MDK
			CCDC40	CD9
			FOS	CPPED1
			LOC105375218	VNN1
			ZNF512B	LOC606724
			GALNT10	HOXB2
			FRAT1	CXCL3
			CDRT4	LOC102467222
			SKP2	DAB2IP
			ZNF700	BIRC3
			ZNF608	IL10
			LOC400043	RASGRF1
			PARP8	DDX58
			TAGAP	NHLRC1
			SPRY2	CAPG
			TMEM147-AS1	KCNMA1
			LRRC8C	LOC101927668
			PRPF38B	FYB1
			SNORD3A	WDR17
			ICA1	OSTF1
			LINC01529	RITA1
			CNTRL	STX11
			ZNF26	MGLL
			MYO7A	CCDC26
			JAG2	TPP1
			CHD7	SMURF2
			NEIL1	PDE6G
			TRMT1	DYNLL1
			CC2D2B	GPR160
			ZSCAN9	RRM2
			CPVL	TMEM51.AS1
			ITIH4-AS1	CLEC1A
			FAM216A	TFAP2E
			LINC01089	CCL8
			SATB1	EPS8L1
			LY75	NCEH1
			HLA-DRB6	SGPP1
			SNAI3	MIR6891
			NREP	SKA3
			MZF1	CD68
			RTTN	CD96
			CROCC	FAM213A
			SLC46A3	DOCK9
			PEX1	GAS8
			GSTM2P1	ARL11
			PROX2	HOTAIRM1
			PILRB	CD28
			ITPRIPL2	DAGLA
			HIST2H2AC	NMNAT3
			PTPN18	RWDD2B
			GNB4	COLEC12
			PRAG1	YBX1
			RBMX	TMEM255A
			CELF2-AS1	SLAMF8
			RGL4	NCAPG
			ABCD4	CMTM1
			GARNL3	NCAPH
			FAM118A	RMND1
			ITGAM	TBC1D8.AS1
			MIR646HG	YWHAH
			KLF3-AS1	ZNF774
			DIP2A	DUSP3
			DLEC1	UBB
			SLC29A3	GBP1
			ULK2	GYPC
			C14orf37	TSPAN33
			OR52N4	MIR6503
			GUSBP11	DTX4
			LOC105371925	SNHG28
			ZNF783	GLMP
			HLA-DMA	FZD5
			NDRG2	PIMREG
			RERE	UAP1L1
			ROBO3	ADGRB1
			TMEM168	MAP2
			TVP23C-CDRT4	MEFV
			OMA1	KIF18A
			RNF141	LOC100128993
			D2HGDH	MROH7.TTC4
			ARHGAP25	PXDC1
			PPT2-EGFL8	KPNA2
			ATG14	B3GNT7
			IFI44L	BAHCC1
			CNPY3	CXCL1
			DSCAM	TSPAN15
			SEMA4C	MYOF
			MSI2	TNFRSF11A
			TRMT13	DIRC2
			WNT5B	SH3PXD2A
			SRGAP2C	WIPF1
			ZNF652	ALMS1P1
			PGAP3	EMILIN2
			SRRM2	NAT8
			PLA2G6	CLDN23
			KLHDC1	EXOC3L1
			TMEM110-MUSTN1	PSMB9
			CCDC14	CLMN
			CELF6	ZNF726
			LINGO3	CYBB
			TNFSF18	AKAP12
			IL18BP	LGALS12
			ASNS	PIPOX
			HYI	PLXNA1
			SUOX	TGFB2.OT1
			ARL5A	ARHGAP5
			PGAM2	SLAMF6
			TMEM52B	IL2RB
			ZRANB2	MICU1
			DHRS9	MTRNR2L6
			PLAG1	ERGIC1
			ADHFE1	COL27A1
			RBMS2	LTBP2
			WBSCR27	KLHL13
			SUZ12P1	ZNF543
			LINC01410	HNMT
			RTKN	SH3BP5.AS1
			APOBEC3G	MIR4709
			FAM193B	KIF20A
			LINC00865	WASHC2C
			PRR12	SLC17A5
			RASAL3	CLEC4F
			GUCY1A3	NCAM1
			NSUN5P1	DTX1
			TP53I13	ST7.OT3
			ANKRD22	EEF2K
			SSPO	KCNN1
			COPG2IT1	TCF4
			MCCC1	MTM1
			PIP5K1B	SHB
			RASSF1-AS1	GBP1P1
			ABCG1	ATAD2
			PIK3R6	GBA
			LYVE1	SPATA7
			HIST2H2AB	CASP1
			INPP5B	SRPK2
			OBSL1	KAZN
			DUT	GDPD1
			HMGN3	CD33
			LINC01160	NGRN
			STAG3	PLA2G12A
			SEC16B	ETHE1
			HLA-DMB	SLC43A3
			FAM198A	ARSD
			CABIN1	LOC283194
			ZNF514	SDC3
			ARL5C	OLFML2A
			CTTNBP2	CCDC112
			ZNF224	THOC3
			ELMO1-AS1	RBP7
			HIST1H2BD	MICB.DT
			CECR2	BRD7
			CKB	LDAH
			TAGLN	CAST
			LOC100996455	MCUR1
			LOC101928304	LINC00977
			CHD9	HTATSF1P2
			ZFHX3	GALNT6
			IL6ST	HLA.A
			TFAP4	RNF135
			SLC29A1	MELK
			LOC100505771	DOCK7
			NAIP	IL15
			CLEC9A	LINC00487
			MXRA8	PEX11A
			BATF3	CXCR4
			PLB1	IFNAR2
			GIMAP2	FAM225A
			ITGA9	VSTM1
			MICU3	MAN2A2
			PKDCC	SLFN12L
			SPTLC3	SGO2
			MAP2K6	MICALCL
			C20orf197	CHST2
			ZNF449	VSIG8
			PRIMPOL	LYZ
			RGS10	CD47
			ZNF33A	HOXA1
			CDK3	GDE1
			ZNF490	ARHGEF16
			SIRT3	CDCA8
			PRAM1	C20orf194
			AHNAK2	CDC6
			BMP2K	PDE6D
			VILL	ATG4C
			NOL4L	ZNF436
			APAF1	HSDL2
			CAMK1D	HIST1H4C
			DERL3	MSR1
			C9orf142	NPM2
			KLF7	MS4A1
			THTPA	TNS1
			LOC100132356	DYRK4
			TRIM34	NFE2L3
			RCBTB1	LOC100287467
			ZNF789	PALM2.AKAP2
			SNX18	AHNAK
			ACCS	MOK
			LOC646471	FTH1
			LPCAT2	AKAP2
			OTUD1	ABCA1
			GNAL	LRRC20
			GPX7	SOCS1
			UBR5-AS1	HYLS1
			ATP10D	AP3S2
			BACE1	NCF4
			DST	PPIC
			INO80B-WBP1	TUBB
			GIMAP1	GABBR1
			FES	TPST2
			WASF2	FAM84B
			RCN3	RPS10P7
			PRRC2B	SNX12
			C14orf159	TNNI2
			FFAR4	ARHGAP21
			ARHGAP4	GOLIM4
			ADAT2	MCUB
			PPOX	MYZAP
			LOC101929718	SLC38A7
			NR2C1	CTSH
			MUM1	CD3E
			TRANK1	PDP1
			LOC100506639	MBOAT1
			SCRN2	FBXO39
			LUC7L3	RELL1
			RUNX2	CARD8.AS1
			GPRASP1	FCN1
			INTU	ICMT
			ZNF117	GBP2
			TSSK3	CES3
			WBP1	ATP6V1A
			FAM122B	PEG3
			RNASEH2B-AS1	KCTD10
			SGK494	MTSS1L
			GIMAP4	BRSK1
			SCNN1D	ABRACL
			SIDT2	CTD.2201I18.1
			ZNF333	IFNGR2
			CREBZF	GYPE
			GLI4	SLC37A2
			USP6	SH3BP4
			RUBCNL	FCGR2A
			PHOSPHO1	STX3
			DOC2A	OBSCN
			TATDN3	DNAJB9
			KIF26B	PTGER4
			PON2	IFIT1
			PIDD1	TSKU
			SLC2A11	MAPK12
			DHX58	ITGA9.AS1
			ZNF609	BRCA2
			SLC12A4	CLEC10A
			MBTD1	AP2S1
			C9orf106	PTTG1
			ZNF385C	UNC13B
			NCK2	CD52
			HIVEP3	LOC100507642
			CARF	CENPBD1
			GIMAP6	VAT1
			SH3TC1	DMXL2
			XRCC3	SVIL.AS1
			HIST1H2AE	PAM
			TENM4	CHID1
			PEX6	ISG20
			ALOX5	CENPK
			LOC100131289	LBX2
			NUDT16	LINC00506
			SCYL3	RAP1GDS1
			CHKA	SH3BP5
			DEF6	LINC01006
			SDK1	JADE1
			HKR1	KIAA0040
			HLA-DQB1	HLA.DRA
			ANKS1A	CLTA
			SPATA13	ITGB8
			TMOD2	MAX
			MTMR1	EDEM2
			HLA-DQB1-AS1	CBX1
			ANK1	NME6
			RNASET2	RARRES3
			LMNTD2	RNASE6
			CAPNS2	CD81.AS1
			C1QTNF3	SFRP4
			HIST1H2BG	SMN2
			ATP2B4	AKAP6
			POLB	EIF5A2
			LOC153684	CLSPN
			SP110	SMN1
			DNAJC10	OCIAD2
			MIS18BP1	SNX20
			APCDD1	LOC100419583
			MXD4	IFI27
			PPP1R3E	TCN2
			IRF8	PTGFRN
			NIPSNAP3B	CBR1
			NPHP4	PARS2
			FCGR1A	PLEKHA7
			SPATA6	ZFYVE16
			CD4	MMP24.AS1.EDEM2
			KCNJ2	RAB9A
			AP4M1	MRPL17
			AASS	FAM124B
			LOC730102	RSU1
			CATSPER2	FAM174B
			KCNMB1	OAS2
			HEATR5B	MTRNR2L10
			ADGRG1	MCU
			CCDC146	FRG1DP
			INTS6L	RAVER2
			PFAS	HMMR
			PRKCQ	CTNS
			LOC102724596	PCGF2
			ZNF721	PRC1
			NYNRIN	ETV7
			CBWD6	P2RY6
			LINC00893	PRSS21
			POLI	AIM2
			TNFSF8	ALCAM
			RPS6KL1	CARD6
			GPC2	INIP
			TMEM86A	AMOTL2
			RHOBTB1	FN1
			RN7SK	LGALS17A
			LINC00578	ZNF311
			MRPL23-AS1	TRIM5
			KIR3DX1	BASP1
			CAHM	BNIP3
			HACE1	SMIM15
			ABCG2	STBD1
			ZNF595	APOBEC3B
			TMEM86B	ZNF730
			LRIG1	SNRPG
			DPY19L3	MPP6
			ZNF23	SCTR
			EPN2	TEX2
			TMEM109	HES4
			C19orf54	NME8
			MRO	TMEM159
			PWAR5	PTMA
			PCGF3	UBE2L3
			SETBP1	UBE2C
			SLC25A29	LOC101927699
			HS3ST4	HLA.DQB2
			TRPV1	MYEOV
			GTF2I	L3MBTL4.AS1
			SH3YL1	NAT8B
			PLEKHM1P1	HEXB
			RNF125	NDUFV2
			HMG20A	TCF12
			LINC00671	PLEKHF2
			SYNGR1	LPIN1
			GAS6	SNX10
			SERPINF2	NTAN1
			GSN-AS1	UBE2L6
			F2RL1	NUDT16P1
			DACT1	SLC9A7
			SOX12	MORN4
			RUFY3	AKR1A1
			TMEM268	CPQ
			ATG16L2	RAB3IP
			LAMB2P1	NECTIN1
			MTERF4	TMEM251
			BAZ2B	IGSF6
			CCDC159	KLF12
			RHOBTB2	NUB1
			ECHDC2	HLA.C
			DXO	TMEM71
			ZNF641	FUT7
			ZNF337-AS1	DEPDC1
			TPCN1	TXNRD3
			HIST1H4E	IBSP
			PLD1	LINC01504
			LOC101926943	HLA.DOA
			CECR1	DCAF12
			ESRRB	LINC02067
			ERMARD	HASPIN
			SCARNA17	ZNF613
			LENG8-AS1	VWF
			MGEA5	ZNF683
			ZNF507	NRBF2
			LOC644794	KLF11
			FKBP5	TRMT5
			JADE2	RPS10
			LOC100289580	RFK
			TRIM52	IL7
			APBB1IP	THRB
			CEP192	AKR1C2
			NOD1	PDLIM5
			TCTEX1D4	KIAA1522
			SLC5A2	CDC42EP3
			HSPBAP1	AP3S1
			RSRP1	SULT1A1
			PMEPA1	NEK2
			CFB	CTSL
			C19orf71	ATIC
			LOC653160	PTGR1
			DOPEY1	RBL1
			ENPP1	NLRP12
			TMEM260	AMIGO2
			ZBTB18	HJURP
			NEB	HLA.DMB
			U2AF1L4	HLA.DQA2
			LRRC24	AHCYL2
			ERV3-1	SEC23B
			C10orf131	SDC4
			LOC100289511	SHLD2
			ZNF791	PDGFRL
			KIF21B	MLLT3
			MEF2B	FNDC10
			ZBTB14	SLC1A4
			PRAP1	KLRC2
			LOC399715	GRN
			ADCK1	ATP6V1D
			LINC00987	KIF11
			SRGAP2B	APEX2
			CD7	DOK2
			NHSL1	IER3
			ZNF302	CDKN3
			LIPC	ZNF101
			LYL1	KNL1
			LINC00996	KYNU
			MRC2	LOC101927417
			INO80B	IDH1
			PRKCA	S100A6
			PRKAG2-AS1	RPE
			MAGEF1	SLC12A8
			ZNF780B	ZNF483
			TSNARE1	HAPLN3
			KRBOX4	TOP2A
			LINC00264	STAT1
			GAPDHS	PRDM6
			HADH	DPRXP4
			FAM228B	MIR4253
			LRIG2	CDK20
			NPHP3	SLC6A12
			DCAF16	IRF9
			PLEKHG4	GMPR
			DFNB59	SEC22B
			ANXA2R	EZH2
			IFT172	TSHZ1
			SLC5A9	PAX8.AS1
			LOC100652768	S100A10
			TMOD1	UTF1
			CHAD	ITGA1
			GPT	LYRM4.AS1
			KIZ	UCP2
			LRFN1	AGPAT4
			ZNF662	LGMN
			ACAD10	C2orf81
			REC8	CLEC4A
			TAMM41	FLNB.AS1
			RFPL1	KIAA1614
			NCMAP	CCRL2
			SCAND2P	ROBO1
			HCG22	ADARB1
			FCHO1	CLEC4E
			ZC3H6	FGFR1OP
			KIAA1109	TTC7B
			CLEC7A
			NICN1
			LOC100379224
			MMP25-AS1
			B4GALT4
			TRAF5
			ZNF767P
			MTURN
			COLQ
			RFPL1S
			OSBPL6
			ZMYM3
			GP9
			SLC44A2
			LDLRAD4-AS1
			CLK4
			BTBD19
			PRKAB1
			SLC2A5
			SLC15A4
			RFT1
			LINC01356
			LYSMD2
			TGFBR1
			SCLT1
			FAM72B
			LOC100240735
			SNORA53
			ANKRD18DP
			NEIL2
			SCARB1
			ZNF518A
			ARSG
			KCND1
			ANKRD24
			CAPRIN2
			CARD14
			ENC1
			PRR15L
			METAP1D
			SPATA20
			NME3
			ARMCX2
			ZNF397
			KCNAB3
			ARHGEF9
			LINC01125
			JAK3
			ZNF562
			UVSSA
			LOC101928767
			PRR15
			TMIGD2
			PHKA2
			HPGDS
			POLG2
			DPH7
			ZCCHC11
			PPT2
			PICK1
			UNC5CL
			CTPS2
			NRIR
			WDR70
			TK2
			ABCA2
			ZNF577
			ZNF133
			FRS3
			IQSEC2
			LOC100130298
			ZBTB16
			PIWIL4
			TMEM178B
			MORC1
			HIST1H3A
			ANKMY1
			LINC01126
			PM20D1
			TP73-AS1
			POGLUT1
			LINC01664
			NSUN6
			MAGEH1
			F2R
			RBM5-AS1
			FAM157C
			KCNA5
			DPYS
			VPS13C
			TSC22D3
			PAAF1
			MSANTD2
			TRMT10B
			CES4A
			LINC00260
			NUMBL
			TANC1
			CAMKK1
			FOXN3-AS2
			GAREM1
			LINC00894
			TRIM6-TRIM34
			ZSCAN26
			ZNF251
			NCKAP5
			BIN2
			SIGLEC14
			TRIM45
			FHIT
			FMO5
			MYCBP2
			GATS
			ZNF708
			ACRBP
			PPIL3
			FLYWCH1
			INAFM2
			SMIM5
			LOC101928068
			BMS1P4
			ARHGAP32
			LOC102723703
			MRE11
			CECR6
			LOC101927751
			HSD17B3
			SCARNA12
			SLC22A17
			LINC01091
			ADAMTSL4-AS1
			APOC4
			IL13RA1
			TAF1
			LINC00342
			C2CD2
			ZNF85
			SPAG8
			RAB40B
			NAV2
			CNNM3
			SEMA6D
			LOC401134
			SLC35A3
			IL18
			OVGP1
			GSE1
			APBA1
			LINC00173
			BEAN1-AS1
			DAAM1
			MAP2K5
			TTF2
			SLC16A8
			SIGLEC11
			LINC01468
			ZNF839
			SLC25A35
			EXTL2
			ZNF439
			PRR22
			FAM135A
			LIG1
			TRIT1
			CTSF
			EP400NL
			HAUS5
			RFX3
			TMEM80
			LOC729218
			STK36
			ZNF18
			CCDC125
			TMEM9B-AS1
			ALDH5A1
			ZNF189
			RAD52
			MRPS31P5
			PSMD5-AS1
			HMGB1
			PDE7A
			FAM53B
			TYSND1
			CYBRD1
			FOXP2
			NRIP1
			ZNF354B
			LOC221946
			PROS1
			PROCA1
			TSPAN32
			ZNF37BP
			ZNF431
			C6orf163
			PEBP4
			TNFRSF6B
			LOC101929719
			KDELC2
			MPHOSPH9
			RWDD3
			BAIAP2L2
			ICAM2
			KIAA1683
			LOC101929563
			WDPCP
			ZMYND15
			YPEL1
			ZNF816-ZNF321P
			ZNF254
			LINC01907
			TMEM236
			PDCL3P4
			TCTN1
			HLA-DQB2
			RASSF4
			ZNF445
			ARHGAP8
			ANKRA2
			MLC1
			CPNE5
			LOC100049716
			HLA-DQA1
			AOAH-IT1
			RECQL5
			FUT4
			ICE2
			CEBPA-AS1
			CHTF18
			SFXN2
			FBF1
			MED13L
			IKZF2
			PRRG4
			OSGEPL1
			ZNF321P
			LINC00539
			L3MBTL4
			2025-03-01
			RPGRIP1
			SIDT1
			ANP32A-IT1
			DNHD1
			CCNB1IP1
			TMEM209
			ZNF469
			YPEL3
			LRRC14
			STMN3
			ITGA9-AS1
			TMC7
			HEMK1
			GABPB1-AS1
			LOC100131347
			RPS27
			PGM5P2
			RFX3-AS1
			PAK6
			ZNF292
			MKS1
			LOC645513
			CHST10
			HLTF
			LOC100288123
			ZFP90
			PWARSN
			OSGEPL1-AS1
			OLMALINC
			FAM159A
			C10orf10
			LINC00663
			SCHIP1
			HCG11
			EFEMP2
			LKAAEAR1
			CCDC180
			USP20
			KANK2
			ZDHHC19
			TOM1L2
			GCA
			PNPLA7
			FAM117B
			BORCS8-MEF2B
			C4orf19
			WIPF3
			ENTPD1-AS1
			ABAT
			ZFP62
			ANKS1B
			ATP7A
			CLDN9
			PPARGC1B
			UBN2
			LOC101929117
			CHEK2
			SMAD7
			TUBGCP5
			TBC1D10C
			EFHC1
			RPL23AP64
			FHOD1
			IGSF22
			CELSR2
			TTN-AS1
			B9D1
			TMEM120B
			PRKD3
			ZNF621
			HCG8
			ROBO4
			TSPOAP1
			RASL11A
			ZNF680
			CEACAM4
			ZNF248
			ZNF211
			DBP
			FAM229A
			RMRP
			ZNF711
			YPEL2
			ANKS3
			ZNF404
			ANKRD44-IT1
			ALDH6A1
			SPATA25
			AGAP9
			POC5
			GAB1
			LINC01000
			ABCA11P
			RAB33B
			L3MBTL1
			FCGR2C
			APOBEC3F
			ZNF671
			GPR155
			STARD4-AS1
			LOC100268168
			LINC00969
			EFCAB7
			PPM1J
			CEBPA
			LINCR-0001
			GRK5
			TSPAN7
			PPP1R32
			WDR27
			SMAD6
			OAS1
			JAZF1
			ZNF138
			DICER1-AS1
			DRD4
			KLHL3
			ITPR2
			SDHAP3
			ANKRD36
			CLDN4
			ZNF491
			C12orf76
			ZCWPW1
			LOC100499484-C9ORF174
			MTAP
			CYP2D6
			LOC101927865
			C9orf66
			LOC101927911
			COL15A1
			AHDC1
			IGIP
			TMEM91
			TNFRSF10C
			PTPN14
			C10orf25
			BNC2
			RHOB
			ERVK13-1
			RGS16
			SKIL
			PHKA2-AS1
			ELAVL4
			B4GAT1
			CDH13
			IQCJ-SCHIP1
			ARMC12
			LOC100128288
			TRIM66
			NPY1R
			KCNAB1
			SEPSECS
			SH3RF3-AS1
			MEGF6
			KBTBD11
			GHRLOS
			MMP11
			LOC101928595
			TSPYL4
			TMEM8B
			ARMC4P1
			HCG26
			FBXL20
			RPPH1
			HERC2P2
			NPR2
			SNHG9
			KRBA2
			CLDN15
			PDGFC
			IFT80
			LOC101928020
			LOC100130548
			LINC01909
			RAD51-AS1
			LOC100287497
			MNDA
			ATP8A1
			EXPH5
			LRRK2
			ZDHHC21
			ADCY10P1
			ARHGAP20
			ZNF660
			AUTS2
			PLPP7
			LOC105372273
			GNLY
			SLC25A27
			EDA2R
			FBXO44
			LINC00399
			ADGRD1
			SETD4
			NIPAL3
			LOC101929829
			GANC
			CRYGS
			LINC00672
			LOC648987
			KLRA1P
			HERPUD1
			LOC642852
			ZNF253
			SLC26A1
			GLT1D1
			USP32P1
			EBLN2
			SEMA3B-AS1
			ANKRD36C
			ASTN1
			CTLA4
			HIST1H3D
			ABHD18
			LOC101927391
			MST1
			TPM1
			BRICD5
			FAM69A
			IRAK3
			AUH
			KIAA0513
			KLC4
			BCAS3
			TMEM143
			ZNF766
			PRUNE2
			ADM5
			ZNF41
			STIM2
			RGS1
			CDH26
			RABL2A
			FKTN
			PIK3C2B
			TMOD4
			NLRP6
			SLC24A4
			ALOX15B
			AKAP7
			ABTB1
			IER2
			SLC18A1
			HPN
			TSSK4
			ZNF177
			TXNDC16
			CORO6
			BTG2
			ZNF69
			LOC339059
			UCN
			HSD17B6
			TMEM220
			LOC100507156
			BACE1-AS
			RPL21
			TMPRSS4-AS1
			RRP7BP
			STAG3L5P
			ELMO3
			LOC100287896
			ASIC3
			LINC00921
			CYP2U1
			WDR5B
			LOC100133331
			KCNG2
			LY86
			SNAP25
			AGMAT
			CTD-2270F17.1
			APOBEC3H
			NALT1
			NUDT17
			FIRRE
			FAM221A
			ANGPTL6
			LOC103611081
			ADAM1A
			C1orf228
			SNORA74B
			PPIP5K1
			ENO4
			GUSBP1
			POU5F1P3
			SLC25A12
			RFX7
			SCARF2
			MOV10L1
			TFDP2
			NUP210
			PELI2
			CNTNAP2
			WBP2NL
			EIF1AX-AS1
			LOC642846
			ACAP1
			RDH16
			GABPB2
			POMK
			HIST1H2AD
			ZBTB44
			CCDC183
			LMO7
			C11orf45
			SRGAP2-AS1
			PYROXD2
			DUOX1
			LINC00899
			CREB3L4
			TBC1D32
			ANKS6
			C6orf226
			SCART1
			FLJ32255
			SCAPER
			TAS2R5
			ZBTB37
			TCP11L2
			CHN2
			ZFP69
			WDFY3-AS2
			LOC91450
			GUSBP4
			MMP28
			FRG1HP
			NBPF1
			PRR34
			KLHL6-AS1
			AIFM3
			TMEM119
			SMPD3
			SPIN3
			C16orf86
			EGR2
			TMEM63C
			KCNIP4
			SSBP2
			NLRP4
			GSTM5
			PMS2P1
			ZNF493
			ASPDH
			CLDN3
			SEPT7P2
			AVPR2
			SLC35E2
			KCNIP1
			DYX1C1
			THSD1
			ACP6
			LOC102724919
			CYP27C1
			ZNF714
			LOC101928324
			TRPM2-AS
			LINC00938
			PASK
			ATXN7L1
			CMTM2
			RNA28S5
			LINC00265
			CDNF
			RAPGEF3
			LOC100996255
			TTC32
			LOC100506476
			PARP3
			JUN
			2025-03-03
			MAMDC4
			TBX19
			P2RX5
			PDCD4-AS1
			CNIH2
			ARMCX4
			LOC401261
			GCNT2
			SUMO4
			ZNF586
			TTC28
			LOC646762
			CLEC2D
			TMEM254-AS1
			FKSG29
			LOC100507487
			LIPM
			LOC101928058
			DUSP27
			LINC00565
			LOC105369438
			UBE2CP5
			SNX32
			LHPP
			LRRC36
			CHCHD7
			C12orf66
			GALNT12
			ZNF559-ZNF177
			LIPT1
			SUPT3H
			ZNF107
			HRC
			MORN1
			CBWD5
			HLA-DQA2
			GRIK5
			B3GNTL1
			FBXW8
			MEF2C-AS1
			CH25H
			HIST1H2AM
			FAM53B-AS1
			PHYHD1
			FAM163B
			CCNG2
			LOC148696
			POPDC2
			SNHG11
			LOC100288778
			COL6A4P2
			LINC01061
			HERC2P9
			ATR
			CAND2
			RALGPS1
			ZNF345
			ZNF785
			ZNF154
			BBS10
			PCSK4
			ZNF30
			LOC102724163
			LINC01001
			PANO1
			LINC00920
			LOC100128108
			KLHL33
			ZNF541
			TRAPPC2
			C8orf44
			RBM43
			CDHR5
			ARHGEF37
			AFF3
			PATL2
			ADAMTS13
			BIVM
			LINC00926
			LOC101929798
			MMP25
			BUB1B-PAK6
			ERI3-IT1
			HIST1H2BF
			LOC101929574
			LOC100289230
			CYP2T1P
			BCKDHB
			LOC102725254
			ACTG1P4
			SYCE2
			CCHCR1
			LTBP4
			CD81-AS1
			LOC101929882
			CCDC191
			RFPL3S
			N4BP2L2-IT2
			SERPINE1
			ZNF717
			FAM72A
			GSTA4
			FBXO36
			LANCL1
			CHSY3
			C19orf57
			TTC8
			LINC00854
			BVES-AS1
			ZIK1
			TEX22
			BMS1P5
			GFAP
			SYCP2
			CC2D2A
			ZFP14
			POLN
			ZNF619
			SYCP2L
			SLC9A5
			TAPT1-AS1
			PARP15
			PDXDC2P
			ZNF763
			TMEM252
			UCKL1-AS1
			LOC254896
			BICD1
			RPS6KA2-AS1
			SPTBN1
			ERC2
			EFCAB13
			UHRF1
			CASS4
			IPW
			FUT10
			NAV2-AS2
			SMYD3
			WDR90
			LOC202181
			MCEE
			MTX3
			ZNF91
			HIST1H4I
			TRIM50
			CSNK1G2-AS1
			OR3A2
			ZNF853
			SULT1C4
			TBC1D22A-AS1
			HSD17B8
			LINC00892
			LINC01590
			ALKBH8
			CD5L
			NSUN7
			TMEM178A
			CCDC154
			PDK4
			ICK
			PRR5-ARHGAP8
			ZNF573
			PPIEL
			DOCK4-AS1
			ZNF546
			C14orf93
			PTTG2
			ZNF141
			NPIPB5
			LOC100507634
			MIR99AHG
			RSAD2
			NEURL2
			GOLGA2P5
			LOC105378614
			SPAG6
			NRGN
			FOXP1
			CCDC188
			TTC12
			LINC01645
			PIK3IP1-AS1
			ZKSCAN3
			PPP1R3G
			ZNF776
			FN3K
			FGL1
			GPR137C
			LOC344967
			WFIKKN1
			CTF1
			KLF4
			C11orf65
			SRPK3
			ABHD11-AS1
			LOC105371433
			LOC102725126
			ITIH5
			SKOR1
			ZSCAN31
			LINC01220
			APOC1P1
			CCT6B
			LOC400927
			MEIS1
			LINC01252
			LOC101928307
			PI4KAP1
			EGR3
			AMOTL1
			DZIP1L
			RNA45S5
			LINC01546
			FLJ10038
			ASPRV1
			NNAT
			PSORS1C3
			GCFC2
			WDR35
			TNNI3K
			LMLN-AS1
			ALDH1A3
			CEP41
			APOL6
			REPS2
			ZNF550
			ZNF70
			LOC100294362
			MTERF2
			FAM120C
			LOC102724552
			HIST1H1E
			DHODH
			DCST2
			HIST1H2BN
			LINC01150
			ZRANB2-AS1
			KRTAP5-10
			ACTA2-AS1
			ZNF137P
			DLG2
			EPHB6
			TNRC18P1
			C1S
			LOC100507557
			TTN
			GEMIN8P4
			ZNF678
			S100A1
			CLUHP3
			LOC102723335
			TAS2R19
			HSF4
			OR3A1
			ERMN
			LOC100507547
			LYSMD1
			GUSBP9
			ACPP
			LRRC39
			TNS2
			AGAP5
			SEMA6A-AS1
			ZKSCAN4
			LRRC27
			ZNF43
			TBCK
			C9orf84
			ZNF544
			PIBF1
			IL1RAP
			LOC102724265
			MYO16-AS1
			CLEC19A
			CROCCP3
			USP30
			MSS51
			TMEM56-RWDD3
			IQCC
			NRN1L
			TMEM231
			LOC105376805
			SMG1P7
			ZNF90
			MIR181A2HG
			FOSB
			EDNRB-AS1
			LOC644285
			FLJ34503
			ANKAR
			DLGAP4-AS1
			CD160
			MROH6
			ZNF471
			MYC
			ABHD12B
			LRRC70
			ZNF391
			SCRN3
			DISC2
			PRICKLE4
			IER5
			ZNRF2P2
			LOC339666
			ZNF626
			LOC728743
			LOC100505716
			C2orf88
			KCNJ2-AS1
			IFT140
			ATP2B1-AS1
			KYAT1
			RBM12B-AS1
			ZNF737
			LOC105378367
			CEP44
			PTPRN2
			SENCR
			ZSCAN2
			H1FNT
			RDH5
			LOC101927365
			RFXAP
			GDPD4
			C19orf18
			GUCA1B
			RNASE3
			PLCL1
			ST3GAL3
			ZFP28
			KIAA1107
			LOC100499484
			MST1P2
			ZNF891
			ZSCAN12
			IFITM2
			LOC729683
			WDR88
			GTF2IRD2B
			SCAI
			ASGR2
			DZIP3
			LINC00484
			CLDND2
			LRRC17
			DEGS2
			LOC102723582
			PDGFB
			KCTD19
			PTPRB
			NUAK2
			WHAMMP2
			PCP2
			C15orf62
			C15orf41
			FAM157A
			PAPOLG
			GPM6B
			LAMP5
			LOC100130992
			LOC285626
			GRIN3B
			ZNF34
			ADGRA2
			ZNF484
			KIF20B
			CACNA1F
			GCNT7
			ALG6
			LOC100506691
			CLHC1
			LINC00852
			WWOX
			LGR4
			LOC171391
			PEX3
			INTS6-AS1
			LHFPL1
			A2M-AS1
			CACNB2
			NBPF8
			CKMT2-AS1
			KCNMB4
			AVIL
			LOC101927905
			MACROD1
			AK9
			ADRA2C
			CDKN2B-AS1
			MAP9
			CBR3-AS1
			FKBP10
			SPIN4
			HLA-F
			HIST1H2BC
			DCLRE1CP1
			PCF11-AS1
			PLEKHH1
			ETAA1
			LOC100996419
			DCDC2B
			LOC101928617
			LINC00441
[truncated: 2 more rows]

## Sheet: 1.8 Extended data Fig2e
Table 1.8	Extended data Fig2e	Unique genes in monoyctes_in_vitro (1451)	Unique genes in up_PN_iHPC_CNS (934)	Overlapping genes (92)			Unique genes in monoyctes_in_vitro (1393)	Unique genes in up_CD34_monocytes_CNS (907)	Overlapping genes (150)
List of genes corresponding to the Venn diagram in Extended Figure 2e		LILRA5	KBTBD12	GLT1D1			ICAM3	CD38	LILRA5
		ICAM3	PCDHB2	C19orf38			MPZL3	DNAJC15	NLRP12
		MPZL3	RIMS3	IRAK3			MEGF9	CD200R1	S100A6
		MEGF9	MYO6	STAT5B			MGAM	LOC100506098	S100A4
		MGAM	DSCAM	IGF1R			MSRB1	TMEM26	CXCR2
		MSRB1	KHDRBS3	VCL			SMIM25	DAPK1	CPPED1
		SMIM25	PCAT7	FLOT2			MYO1G	SASH1	KIF13A
		MYO1G	FOXP2	SLC25A37			RIPOR2	MCTP1	SLCO3A1
		RIPOR2	ST6GALNAC3	RAB3D			GLIPR2	LRRC61	RARA
		GLIPR2	COCH	CKAP4			MXD1	HS3ST3B1	SEMA4A
		NLRP12	PAQR5	SMAP2			FPR2	ZNF528	SELL
		S100A6	TJP1	OLFM4			JAML	PRSS36	HK3
		MXD1	MEIS1	NFAM1			CSTA	TGFBI	TAGLN2
		S100A4	ZFYVE9	KDM6B			SYTL1	FCGBP	RBP7
		FPR2	HS3ST4	MTMR3			CFP	HSD17B7P2	MEFV
		CXCR2	TMIGD2	LOC100128276			FGR	GAPLINC	EIF4E3
		JAML	RASGEF1C	AGO4			F5	GNG12	AHNAK
		CSTA	ANKRD18DP	SOX4			ARG1	KITLG	ZDHHC18
		SYTL1	LINC01141	LIMD2			SVIL	MMP13	ADD3
		CFP	ZNF711	IRS2			DGAT2	ACVRL1	CLEC4E
		FGR	NEO1	RASGRP2			CRISPLD2	ACP5	SIPA1L1
		F5	SGCB	LYST			PRF1	CERKL	DOCK5
		ARG1	FGL1	FAM157A			BCL6	CCDC170	PRKAR2B
		SVIL	AASS	SLC44A2			NRGN	HACD4	CD300E
		DGAT2	CECR2	MANSC1			FLNA	LINC01146	STX11
		CPPED1	TSPAN7	LOC101928143			GLT1D1	NEURL3	SLC22A15
		CRISPLD2	SLC2A5	RAF1			SYNE2	ITGA4	CLMN
		PRF1	DHRS9	FAM160A2			TALDO1	GBP4	RAB11FIP1
		BCL6	NEXMIF	C1RL			FOSL2	ZNF568	PLBD1
		NRGN	LRP6	ANXA6			STK38	FRG1EP	STX3
		FLNA	EGFL7	ITPRIP			ADGRG3	RASGRP3	CDC42EP3
		KIF13A	EFNB2	PTCSC1			GRK6	FGD5	LRRFIP1
		SYNE2	LRP5	PELI2			CRIP1	LAMB2	NCF1
		TALDO1	TMEM178B	SLC37A3			KREMEN1	GCNT1	TACC3
		FOSL2	PLCXD3	LDLR			SH3BGRL3	ZNF366	MICAL2
		STK38	WNK3	FRAT1			SYNE3	ZNF572	BASP1
		ADGRG3	LOC101928304	SLC27A3			CCND3	ZFP3	EMILIN2
		SLCO3A1	IQCJ.SCHIP1	KDM4B			LRG1	CLDN1	PTPN22
		GRK6	RAB11FIP5	SHROOM1			TNFRSF10C	SPIRE1	SULT1A1
		CRIP1	ADGRG1	RAP1GAP2			ADGRE3	DUSP6	CHST2
		KREMEN1	ADAMTSL2	KLF2			IL1R1	APOL3	SLC6A6
		RARA	DLC1	NUDT16			APOBEC3B-AS1	SESTD1	LGALS12
		SH3BGRL3	DOCK6	PLPPR2			B4GALT5	DRAM1	DOK2
		SEMA4A	EMILIN1	CLSTN3			S100A9	ARHGAP18	CD52
		SYNE3	SPRY1	RINL			NCF2	TSHZ3	TMEM71
		CCND3	NPTXR	CCND2			AGTPBP1	TSPAN4	BIRC3
		LRG1	BRINP2	GMEB2			ADAM8	MIR4761	TMEM154
		TNFRSF10C	SHE	LOC729683			MAP2K3	MYO5A	MBOAT1
		ADGRE3	SHTN1	MYL9			NOD2	RALGDS	ANTXR2
		IL1R1	GIPC3	MSL1			PFKFB4	MELTF	APOBEC3B
		APOBEC3B-AS1	TBXA2R	OGA			SEC14L1	WTAPP1	CARD16
		SELL	SLC15A2	OSM			RASSF3	ARL4C	SNX20
		B4GALT5	APBA2	GP9			MAPK14	NAALADL1	PSTPIP1
		S100A9	AMOTL1	PNPLA2			PIM2	HOXB4	MAN2A2
		NCF2	AKT3	VPS51			TSC22D3	CCDC102A	SEMA4B
		AGTPBP1	SYNDIG1	PER1			LILRB3	CDR2	CSGALNACT2
		ADAM8	GGT7	MATK			VASP	LGI2	CREB5
		MAP2K3	SEMA7A	FAM214B			C19orf38	TMEM26.AS1	SH3BP5
		NOD2	ARHGAP32	COQ8B			TMX4	GNPDA1	CD1D
		HK3	GRASP	PHC2			EHD1	MIR155HG	LILRB2
		PFKFB4	PCDHGB6	VAMP2			NLRP6	POMC	VIM
		SEC14L1	RBM19	OXER1			SHKBP1	SNTB2	GABBR1
		RASSF3	GATA4	ARSG			RAB37	VIM.AS1	CRTC3
		MAPK14	ENC1	NR4A1			EIF4EBP2	DPYD.AS1	NDRG1
		PIM2	WASF3	CSNK1G2			TUBA4A	ITGAD	ANXA1
		TSC22D3	SORL1	CBX6			SULF2	CDCA7L	VSTM1
		LILRB3	LRP1B	FBL			DPEP2	PRR5L	AP1S2
		VASP	FAM166B	SLC9A8			USP3	DNAH11	ACTN1
		TMX4	IGSF10	VPS37B			CLEC4D	ZNF506	VNN1
		EHD1	CAMK2B	ARRDC1			LTA4H	LOC105374454	FUT7
		NLRP6	SRGAP2	MARK2			TSEN34	UTRN	KIAA0040
		SHKBP1	EMID1	LINC00537			ADM	DENND2D	AGPAT4
		RAB37	LOC145694	SAP30			MTMR11	ME1	KCNAB2
		EIF4EBP2	NOS1AP	TESC			RNF24	ASRGL1	SYNE1
		TAGLN2	SLC9A5	FOXO1			IRAK3	CNIH3	SNX10
		TUBA4A	EFEMP2	PRKAG2			LIN7A	ST7	GBP2
		SULF2	LOC101929563	LINC01410			TKT	VANGL1	SRPK2
		DPEP2	PNMA8A	RAB40C			HAL	GPRC5B	BHLHE40
		USP3	RTKN	AKT2			RARA-AS1	RPP25	LYZ
		CLEC4D	GLIS3	ITPKB			TREM1	EPAS1	HSH2D
		RBP7	ASTN1	CSRNP1			DAPK2	SMAD1.AS1	ST3GAL4
		LTA4H	LINC.PINT	CDK6			SNTB1	MDFIC	CRYBG1
		TSEN34	CDC14B	LINC00641			UBXN11	DUSP10	FTH1
		ADM	CYTH3	ITPKC			XKR8	RTN1	GIMAP7
		MTMR11	PCDHGA10	SELENBP1			CD55	CD109	NCF1C
		RNF24	GABRA3	CITED4			CCR2	BCL2	SNN
		MEFV	PCDHGB7	ZASP			IMPDH1	PECAM1	FCN1
		LIN7A	LRIG1	LRCH4			ADGRE5	SLC38A6	CD101
		TKT	MMRN1	PGAM2			SOCS3	PDE7B	ADGRE1
		HAL	PURPL	TMEM86B			CSF2RB	ZNF257	CLEC10A
		RARA-AS1	MIGA2	EGR1			NEDD9	RHPN1	CAST
		TREM1	APOC2	NEAT1			PYGL	GAS2L3	KLRF1
		DAPK2	MSLN				SLCO4C1	CD80	CLEC4A
		SNTB1	GRASP.AS1				RAB27A	SMPDL3A	LILRA2
		UBXN11	ERF				LMNB1	MMP15	BRI3
		XKR8	GSTM4				PGD	MCOLN2	S100A10
		CD55	TMEM119				CNN2	MIR4458HG	FNBP1
		CCR2	SCHIP1				HVCN1	CALHM6	CD48
		IMPDH1	SETBP1				CDKN2D	RRN3P1	SLAMF6
		ADGRE5	APOC4.APOC2				VNN3	FLNB	LILRA1
		SOCS3	CSF1R				STAT5B	LILRB1	MCU
		CSF2RB	SFXN2				ABHD5	FAM24B.CUZD1	PLXNC1
		NEDD9	ADGRA2				GMFG	GCLC	MBP
		PYGL	NCKAP1				RETN	SEL1L3	TNFAIP2
		SLCO4C1	MCF2L				IGF1R	TMEM150B	LITAF
		RAB27A	DNALI1				CCNDBP1	ZNF618	ANXA2P2
		LMNB1	TSC22D2				RAC2	ST14	IQGAP1
		PGD	ZNF853				APOBEC3A_B	RAB42	FXYD6
		CNN2	TLN2				CDC42EP2	CAMK1	HTATSF1P2
		HVCN1	DOCK3				SMARCD3	S1PR2	LGALS1
		CDKN2D	BHLHE41				GCA	RRAGD	VAV3
		VNN3	SORCS1				NDEL1	ZNF835	CD44
		ABHD5	NECTIN3				TBC1D2	SCAMP5	BLVRA
		GMFG	CA8				TSPAN2	LDB2	NCF4
		EIF4E3	BCAR3				GSTP1	ABCC3	ALDH1A1
		AHNAK	C3orf70				CD300LB	PPM1H	CD300LF
		RETN	PCDHGC4				IFITM2	CSRP1	DMXL2
		CCNDBP1	ABR				SPON2	CXCR2P1	IQGAP2
		RAC2	DCLK2				G6PD	BTN3A3	BLVRB
		APOBEC3A_B	TNIK				SLC11A1	TRIM47	CCL5
		CDC42EP2	ACY3				MGST1	JHY	CMTM1
		SMARCD3	AHCYL1				KLF13	KIAA1958	DPYD
		ZDHHC18	NBEA				VCL	ESR1	KLRK1
		GCA	ARMH4				SOD2	GALC	ANXA2
		NDEL1	CCDC168				SLC9A3R1	FOXRED2	CD3E
		TBC1D2	PCDHGC5				FFAR2	CLEC12A.AS1	PLAC8
		TSPAN2	CAMSAP1				NUMB	GRAMD4	MS4A1
		GSTP1	OSBPL6				ALDOA	NLN	AP3S1
		CD300LB	SHC1				CD244	SLAMF7	SECTM1
		IFITM2	NAP1L3				R3HDM4	RAP2B	SPTA1
		SPON2	EML5				PSTPIP2	FECH	ARRDC4
		ADD3	OLR1				CAPNS1	IGFBP4	ABRACL
		G6PD	MMP28				MARCKSL1	GRM1	TNFAIP8
		SLC11A1	ALPK3				IL2RG	NRP1	NME8
		MGST1	ARHGEF37				EFHD2	SDSL	GPR141
		KLF13	PCDHGB2				PTK2B	MPEG1	MCUB
		SOD2	ZNF667				DIAPH1	MIR4315.1	GBP5
		CLEC4E	PCDHGB1				HRH2	MIR4315.2	NRBF2
		SLC9A3R1	PCDHGB4				TSPO	SNX24	C5orf56
		FFAR2	NRBP2				BST1	GPNMB	GNG11
		NUMB	KCNA5				PDLIM7	KLHDC7B	IL2RB
		ALDOA	PCDHGA3				PDLIM1	CISD2	LGALS3
		CD244	PIK3IP1				MMP9	ADAMDEC1	PSMB9
		R3HDM4	PCDHGA1				NARF	DOCK1	HOTAIRM1
		PSTPIP2	SLC25A25				COTL1	TMEM144	CXCL1
		CAPNS1	PCDHGA8				AGTRAP	OPTN	F13A1
		MARCKSL1	PCDHGA2				BCL3	IDO1	CHCHD2
		IL2RG	PCDHGA4				BTG1	TMEM51	TNNI2
		EFHD2	SCML2				TBC1D10C	CUZD1	UBE2C
		PTK2B	GLDN				FLOT2	PAPSS2	LOC606724
		SIPA1L1	CPNE5				CYTIP	ARHGAP10
		DIAPH1	SH3TC1				CMTM2	HRH1
		HRH2	PTPRB				SLC25A37	LACC1
		TSPO	DPP4				AP5B1	SLC39A8
		DOCK5	PCDHGA5				DGKD	CHST13
		BST1	COL8A2				XPO6	CALHM2
		PDLIM7	MIR31HG				ARPC1B	CRTAM
		PDLIM1	HRC				CYP4F3	COMT
		MMP9	LRIG3				ZBTB16	UNC5B
		NARF	ADAMTS17				RAB24	TNFSF15
		COTL1	PLK3				INKA2	GALM
		PRKAR2B	LOC105372273				HMGB2	SOBP
		AGTRAP	PTGER4P2.CDK2AP2P2				HCK	KATNAL1
		BCL3	JAM3				GNB2	ZNF229
		BTG1	LAMP5				ADAM19	HERC5
		TBC1D10C	RALGPS2				SLC12A6	FPR3
		CYTIP	PCDHA4				PPP2R5A	GBP3
		CMTM2	PDE3B				SULT1B1	TEC
		AP5B1	PPM1J				RAB3D	PCBD1
		DGKD	ZNF827				USB1	AURKA
		XPO6	PCDHGA9				2025-09-09	AXL
		ARPC1B	NXN				LINC00937	SERINC5
		CYP4F3	SLC25A27				CCDC88C	CDC42BPA
		ZBTB16	MEST				ALPL	HSD17B4
		RAB24	LOC399975				CKAP4	RHPN2
		INKA2	TNFRSF13C				ZNF516	TRPS1
		HMGB2	GSTM3				LUCAT1	NUSAP1
		HCK	LINC01854				PISD	CHURC1.FNTB
		GNB2	TBC1D16				LOC254896	ZNF829
		ADAM19	RASSF8				DBN1	RNASE1
		CD300E	TSPAN5				SLC2A6	MS4A4A
		SLC12A6	SPTLC3				RASSF5	MS4A4E
		STX11	PLPP7				HIPK1	SMAD1
		PPP2R5A	PCDHGA7				SRPK1	LOC100130950
		SULT1B1	PALD1				ADAMTSL4	MFHAS1
		USB1	IFNE				ACSL1	STX2
		SLC22A15	ENO4				GAS7	MS4A14
		2025-09-09	AMOT				LINC00694	GPC4
		LINC00937	ACKR2				PIGX	SLC40A1
		CCDC88C	PTCH1				MBOAT7	CACNA2D3
		ALPL	PCDHGA11				MXD3	AGAP2
		ZNF516	SLC22A17				MMP25-AS1	EYA2
		LUCAT1	PCDHGA6				MLC1	LOC107985544
		PISD	MIR3605				NIN	PMP22
		LOC254896	CYTH2				CCNY	CASP7
		DBN1	ST6GALNAC6				CCDC69	MCC
		SLC2A6	OVOS2				KCNJ15	PLAU
		RASSF5	NKX3.1				FAM117A	ZNF350
		HIPK1	PCDHGB3				PLAUR	SDS
		SRPK1	TMEM63C				PABPC1	CXCL11
		ADAMTSL4	ALDH5A1				EMP3	ZNF559
		ACSL1	MACROD2				UBR2	MS4A7
		GAS7	DIP2A				ORAI2	DNAJC5B
		LINC00694	PMS1				MMP25	SLC30A4
		PIGX	CSGALNACT1				AATBC	TNFSF13B
		CLMN	MIR6737				VNN2	PIP4P2
		MBOAT7	LRRC66				PLP2	SLC25A24
		RAB11FIP1	TRIM46				ADGRE2	MCM10
		MXD3	PLAG1				ARAP3	PPFIBP1
		MMP25-AS1	HHIPL1				TLR8	RNF144A
		MLC1	RASSF10				PTGDR2	HOXB6
		NIN	DAGLB				FURIN	SCIMP
		CCNY	PKDCC				PPP4R1	URB1.AS1
		CCDC69	FUT1				S1PR5	LAMP3
		KCNJ15	ATP8B2				TRAPPC1	TENT5A
		FAM117A	GAREM2				CEACAM3	SKA1
		PLAUR	AFDN				RFLNB	GPR65
		PABPC1	XIRP1				OAZ1	STARD13
		EMP3	HOMER1				PROK2	SLC25A43
		UBR2	ATP9B				DSC2	VSIG10
		PLBD1	PIP5K1B				SMAP2	SPG21
		STX3	PABPC4				OLFM4	HRNR
		ORAI2	TAL1				NADK	CD6
		MMP25	ADAMTS9				TXNIP	FAM213B
		AATBC	UPF1				CCNJL	AHR
		CDC42EP3	CD99L2				FKBP8	SAMD4A
		VNN2	IGSF21				P2RX5	MRAS
		PLP2	LOC100507346				RASSF2	GOT1
		ADGRE2	CKB				TECPR2	LOC100506321
		ARAP3	LDOC1				STAT3	BCL7A
		LRRFIP1	FBXL7				STK26	CPT1A
		TLR8	FBXO17				IMPA2	KCTD1
		PTGDR2	FLJ23867				RFX2	LDLRAD3
		FURIN	LOC100289656				SBNO2	ZNF880
		PPP4R1	NAV3				MTHFS	IGF2BP3
		S1PR5	COL6A4P2				DHRS13	TRIM6
		TRAPPC1	NET1				UBE2R2	LOC101927070
		CEACAM3	MOS				MINDY1	KMO
		RFLNB	LINC00958				CD177	BTN3A2
		OAZ1	ZNF667.AS1				PTPN6	CCNB1
		PROK2	LOC100507156				DEDD2	PBX3
		DSC2	SMAD3				NFAM1	TRIM14
		NCF1	DLG2				PPP1R3B	SDC2
		TACC3	MIR4257				ZYX	PRLR
		NADK	AHDC1				ACTN4	C1orf21
		TXNIP	KIAA1211L				PHF21A	CAMTA1
		CCNJL	DNER				CA2	TSPYL5
		FKBP8	EED				CD36	TNFRSF14
		P2RX5	SYT3				SLC22A4	DMD
		RASSF2	LHFPL2				ST3GAL2	MROH7
		TECPR2	TTC28				DMTN	CPAMD8
		STAT3	GPRASP1				STK17B	C1orf127
		STK26	PCDHA9				LIPN	BUB1
		IMPA2	DGKA				ACAP1	CD209
		RFX2	F2R				RNF149	BATF2
		SBNO2	CDKN2A				IQSEC1	GPX3
		MTHFS	ZNF26				LOC101928034	S1PR1
		DHRS13	PCDHGB5				JAK3	RHNO1
		UBE2R2	GGNBP2				LTB	ZNF804A
		MINDY1	SERTAD2				LIMK2	CTSD
		CD177	PCDHA11				FRY	PHACTR2
		PTPN6	LINC02317				CLIC3	IQCD
		DEDD2	CMYA5				LCP1	ADGRG5
		PPP1R3B	PTPN13				DBNL	ABCA5
		ZYX	A2M.AS1				SERPINB1	CPNE8
		ACTN4	DUOX1				H3F3B	TAF4B
		PHF21A	SLC2A10				CORO1A	TMEM123
		CA2	TPST1				NACC2	APOL1
		CD36	IPCEF1				PLEKHM1	SIGLEC1
		SLC22A4	NAB2				NATD1	ENDOD1
		ST3GAL2	MPDZ				CAMKK2	SLC46A1
		MICAL2	PCDHA10				ST20-MTHFS	RSPH3
		DMTN	GSTA4				TRIM25	TRIB2
		BASP1	GDAP1				GZMH	SGTB
		STK17B	SEMA6A				CARHSP1	ACKR3
		EMILIN2	RAPGEF1				CAPN2	H2AFY2
		LIPN	GRIK5				HEBP2	FHAD1
		ACAP1	POFUT1				RALB	IFIH1
		RNF149	PCDHAC2				LRRFIP2	NUPR1
		PTPN22	MFSD11				LRRC25	SGPL1
		IQSEC1	PLCD1				MNDA	USP32P2
		LOC101928034	GSTM2				TIMP1	HS3ST1
		JAK3	CDKN1A				NAMPT	RTP4
		LTB	PCDHAC1				MCL1	B3GALNT1
		LIMK2	RD3				THBS1	HOXB.AS1
		FRY	CNPY4				ESYT2	BTN2A3P
		CLIC3	PDCD6IPP2				PLIN3	RAD51AP1
		LCP1	TEX30				MSN	NR1H3
		DBNL	FAM122B				IDS	KCNC4
		SERPINB1	RNF122				RIN1	OTOA
		H3F3B	PLXNA2				PXN	LAG3
		SULT1A1	KIRREL3				INPP5A	TESPA1
		CORO1A	LOC101929516				JPT1	FGD6
		NACC2	TDRD10				SSH2	STK32B
		PLEKHM1	PCLO				GFI1B	ASCL2
		NATD1	MINOS1.NBL1				ATG3	TRIM59
		CAMKK2	NBL1				2025-03-08	CENPE
		ST20-MTHFS	EGR3				RIPOR3	EVC
		TRIM25	WASF2				LFNG	LOC101927243
		GZMH	SDK1				RGS14	GPRIN3
		CARHSP1	CYP27C1				KDM6B	CCSER1
		CAPN2	DACT1				SEPT5-GP1BB	OTOF
		HEBP2	PCDHA7				SIGLEC9	POTEE
		RALB	PIAS3				FAM129B	MAFB
		LRRFIP2	BCAS4				FBXL5	LILRB5
		LRRC25	AMH				PDLIM2	LBX2.AS1
		MNDA	CD34				ABTB1	FAM218A
		TIMP1	NAA40				DUSP2	SERPING1
		NAMPT	B4GALT4				TBL1X	IL2RA
		MCL1	CTTNBP2				ANPEP	RUNX3
		THBS1	PCDHA6				ANXA11	PLA2G16
		ESYT2	ADAMTS4				RGS2	ERAP2
		PLIN3	RPS6KL1				MTMR3	HLA.DPA1
		MSN	SKI				JUNB	SLX1A
		IDS	LIN28B				MBOAT2	SLX1B
		RIN1	GOLGA8M				HCAR2	GSAP
		PXN	SIPA1L2				CDC42SE1	FKBP9
		CHST2	WHAMMP2				CTSW	RASGEF1B
		INPP5A	PCDHGA12				S1PR4	CEP83
		SLC6A6	SUN1				QPCT	OPN3
		JPT1	SNPH				LPGAT1	TMCO4
		SSH2	LOC148696				PFN1	KLRC4.KLRK1
		GFI1B	CLSTN1				SLC16A6	TXK
		ATG3	KCNIP1				TMEM43	CENPA
		LGALS12	B3GNT5				FGFBP2	ARMT1
		2025-03-08	GPSM1				RYBP	PRRG1
		RIPOR3	MIPOL1				2025-09-01	SEMA4F
		LFNG	RPS6KA2				RAB11FIP4	ESCO2
		RGS14	MAGI1				ARMH1	DIRC3
		DOK2	MAGI3				EEF2	LOC102723753
		SEPT5-GP1BB	NCK2				KRT23	CORO2A
		SIGLEC9	FAM163B				LOC100128276	SLC38A5
		CD52	MIR378I				ZAP70	HLA.DRB1
		FAM129B	HACD1				TENT5C	TGFB2
		FBXL5	SLC12A4				OAF	EPHB2
		PDLIM2	SLIT2				IGF2R	IQCK
		ABTB1	LINC00642				SOS2	SLC22A5
		DUSP2	FAM181B				SUN2	SLFN11
		TBL1X	PCDHA12				YBX3	FRMD4B
		ANPEP	PCDHA8				FKBP5	FTL
		ANXA11	KBTBD11				SH3BP5L	KCTD15
		TMEM71	IL13RA1				SERPINA1	DENND1B
		RGS2	MAP6D1				CYFIP2	MYO10
		JUNB	ITM2C				FAM126B	ZNF382
		MBOAT2	LINC00578				FAM107B	FABP3
		BIRC3	PRICKLE2.AS1				AGO4	TRIM61
		TMEM154	METTL7A				CCR3	C10orf55
		MBOAT1	MIR29B2CHG				TCP11L2	ECT2
		ANTXR2	SMYD3				NTNG2	C9orf139
		HCAR2	SYCP2L				KLHL2	ANAPC13
		CDC42SE1	PCDHA1				SH2B2	ABHD6
		CTSW	CROCC				FDFT1	ZNF285
		S1PR4	CAPNS2				SOX4	PKD2L1
		QPCT	PCDHA13				FGD3	C15orf38.AP3S2
		LPGAT1	HAAO				UPP1	MMP14
		PFN1	ANGPTL8				LRRK2	ATP1B3
		SLC16A6	CEP126				JARID2	CXCL10
		APOBEC3B	PSORS1C3				S100A8	SLFN13
		CARD16	LCAT				GZMB	CADM1
		TMEM43	SUSD6				RASGRP4	EDNRB
		SNX20	C1orf226				NUP210	PTER
		FGFBP2	USP2				ATP2B4	NRP2
		RYBP	GDF11				NFKB2	CXCL9
		2025-09-01	CLN8				PLEKHG3	CCDC144B
		PSTPIP1	APBA1				LIMD2	CD14
		RAB11FIP4	PATZ1				OLIG1	FNTB
		ARMH1	COL7A1				FCRL3	CLDN12
		MAN2A2	PCDHA3				NFIL3	MITF
		EEF2	CCND2.AS1				AMPD2	MAP3K21
		KRT23	ZCCHC12				PPP1CA	IRF4
		ZAP70	SMURF1				HDAC4	SMC4
		TENT5C	TIAM1				SLC20A1	CLIC4
		OAF	RASSF8.AS1				FRAT2	PARVB
		IGF2R	BCAR1				LST1	UQCC2
		SOS2	KIAA1211				CFD	RUFY4
		SUN2	TENM4				CEACAM4	SLFN5
		YBX3	TEK				SH2D3C	HOXB3
		FKBP5	PDK4				ATP2A3	TCHH
		SH3BP5L	TSPAN14				REM2	ANKRD29
		SERPINA1	PCDHB3				IRS2	ROR1
		CYFIP2	S100B				UNC119	SNRPC
		FAM126B	ZNF300				PPDPF	GLYATL1
		FAM107B	PCDHA2				NLRC3	GLB1L
		CCR3	PLPP1				PRSS33	KIF15
		TCP11L2	ZNF333				LOC643802	MAPK13
		NTNG2	PPP6R2				CSF3R	GVINP1
		SEMA4B	YES1				PPP4C	CEP55
		KLHL2	PRKAG2.AS1				MOB3A	ATG7
		SH2B2	LRRC36				UBE2D1	TNFSF10
		FDFT1	KCNC3				BAZ1A	TDRKH
		FGD3	KRTAP5.9				PANK2	ARMCX1
		UPP1	TMC7				TUT7	ST3GAL5
		LRRK2	RASA3				USP3-AS1	ZNF114
		JARID2	MTCL1				AP2A1	FAXDC2
		S100A8	CLDN3				THEMIS2	KLHDC8B
		GZMB	HES6				RASGRP2	SAMD9
		RASGRP4	SSBP2				MIR22HG	HERC2P4
		NUP210	KANK2				BCL2A1	HLA.DQB1
		ATP2B4	CEP68				UNC13D	SARM1
		NFKB2	NFKBID				FES	ABLIM3
		PLEKHG3	CCDC40				HCG27	MGC12916
		OLIG1	INHBA				G0S2	LOC101928123
		FCRL3	KIF21B				CD24	IFIT2
		NFIL3	CRTC2				LRP10	GNS
		AMPD2	CTLA4				APOBR	LGALS3BP
		CSGALNACT2	LY6G5B				FAM89B	CENPF
		PPP1CA	LOC101928058				ASGR2	NPC2
		HDAC4	FLJ34503				CDKN1C	KIR2DL4
		SLC20A1	SPATA18				MYL6	P4HA2
		FRAT2	VSIR				ADAM15	TMEM37
		LST1	PIH1D1				SLC31A2	ASAP1
		CFD	LINC01002				RALY	CCNB2
		CEACAM4	GALNT2				LYST	SNX9
		SH2D3C	PCIF1				C16orf54	ST18
		ATP2A3	MPZL1				FAM157A	OSBPL1A
		REM2	ACOX3				TNIP1	AMDHD1
		UNC119	PTPN18				KCNE3	DSE
		PPDPF	LINC01529				ADAP1	SELENOP
		NLRC3	GPR132				ARHGAP30	LINC01094
		CREB5	SLC37A1				LILRA6	NT5C3A
		PRSS33	TNPO2				TXN	CLEC2B
		LOC643802	OLFM2				DEF8	BHLHE40.AS1
		CSF3R	INTS10				LTB4R	HGF
		PPP4C	GSTM2P1				FCRL6	CCR6
		MOB3A	PTPN14				CEBPD	NABP2
		UBE2D1	USP11				FAM53C	MACC1
		BAZ1A	LMBR1L				SLPI	MLPH
		PANK2	POLE				MVP	GPR82
		SH3BP5	SHMT1				SLC44A2	AKR1E2
		TUT7	SLC9A3.AS1				TCL1A	HLA.DPB1
		USP3-AS1	ZNF385C				FAM157C	NHS
		AP2A1	ABCC4				KDM1B	PTPRO
		CD1D	CDK9				GZMM	ASPH
		THEMIS2	KCP				NUAK2	ZNF585B
		LILRB2	SNCA				STXBP5	CR1L
		VIM	USP4				CLC	LINC00900
		MIR22HG	SLC25A29				PXN-AS1	WWP1
		BCL2A1	PIEZO1				PTGIR	HCP5
		GABBR1	THUMPD2				MAP2K2	PGM1
		UNC13D	LOC105377342				SLA2	HLA.DQA1
		FES	ZFPM2.AS1				SLC24A4	FRG1JP
		HCG27	MXD4				LOC101927954	CCDC152
		CRTC3	SKIDA1				MYH9	HIST2H2BF
		G0S2	PCDH18				TUBB4B	HLA.DQB1.AS1
		CD24	TPM1				FAM49A	CD163
		LRP10	IGFBP3				CD79A	HLA.B
		NDRG1	UBE2E4P				BCR	HLA.DMA
		APOBR	RAMP1				RNF10	ERAP1
		FAM89B	MAST3				MANSC1	VTI1B
		ANXA1	RAB39B				ARHGEF3	CKAP2L
		ASGR2	CHKA				GPAT3	NECAP2
		CDKN1C	C19orf71				ZNF319	KLRC1
		VSTM1	KLF3.AS1				PCBP1	LOC101927322
		MYL6	RUSC2				CFLAR	KCNA3
		ADAM15	MIR503HG				MYD88	ABCC5
		SLC31A2	EPOR				CYSLTR2	CEPT1
		RALY	KLHL18				FOLR3	PLEK2
		C16orf54	DOC2GP				PXK	PTPN20
		TNIP1	SGSM1				ZBTB18	F11R
		KCNE3	KCTD19				SLC2A3	ARG2
		ADAP1	KRTAP5.8				LOC101928143	LRFN4
		ARHGAP30	TMEM132E				C5AR1	WASHC2A
		LILRA6	PPP1R10				RAF1	LOC101927151
		TXN	MIR600HG				RAB44	TANC2
		AP1S2	WDR91				TPPP3	SPATS2L
		DEF8	NUP62CL				PTENP1	LOC100506585
		LTB4R	SRSF2				RRP12	IFNAR1
		FCRL6	ORMDL3				FAM160A2	MMP12
		CEBPD	SLAIN1				TMEM256-PLSCR3	SMS
		FAM53C	LPCAT2				THBD	PAX8
		SLPI	TTC9				NLRP1	CD93
		ACTN1	LOC100130298				C1RL	TICAM2
		MVP	UPF3B				FAM129C	PRDX1
		TCL1A	PCDHA5				RAB1B	LINC02328
		FAM157C	LIG1				LINC01127	VENTX
		KDM1B	TMEM236				ANXA6	TNFRSF14.AS1
		GZMM	FRMD4A				STXBP2	ADAP2
		NUAK2	IDI2.AS1				MEG3	SLC2A9
		STXBP5	PAN3				SMCHD1	CDC20
		CLC	ANKS6				FAM200B	PRICKLE1
		PXN-AS1	RAB28				IL27RA	MDK
		VNN1	CELF2				RPL18	CD9
		PTGIR	CYP2T1P				CARS2	CXCL12
		MAP2K2	ING5				TMEM164	EPSTI1
		FUT7	PADI1				ETS1	HOXB2
		SLA2	STRN3				KEL	CXCL3
		SLC24A4	MAPK10				PLSCR3	LOC102467222
		LOC101927954	ZNF846				WARS	DAB2IP
		KIAA0040	PROX1				HCAR3	IL10
		MYH9	AP4M1				ALOX15	RASGRF1
		TUBB4B	ELOVL6				ASGR1	ADGRG6
		FAM49A	CD3EAP				CTSS	DDX58
		CD79A	SPNS2				CFL1	NHLRC1
		BCR	IRAK2				RFTN1	CAPG
		RNF10	LINC01770				TUBB1	KCNMA1
		ARHGEF3	SNORD139				CHMP2A	LOC101927668
		GPAT3	LY75				NBEAL2	FYB1
		ZNF319	TNKS1BP1				FAAH	WDR17
		PCBP1	ERCC3				USP15	OSTF1
		CFLAR	ADAMTS6				UBN1	RITA1
		AGPAT4	MAP4K4				ITPRIP	FGL2
		MYD88	DLST				PTCSC1	MGLL
		CYSLTR2	GUCY1A1				VIM-AS1	CCDC26
		FOLR3	ABCB9				SERPINB8	TPP1
		PXK	CNGA1				NDST1	SMURF2
		ZBTB18	FHOD1				CAMK2G	PDE6G
		SLC2A3	PCDHB9				AGO2	DYNLL1
		C5AR1	PDPN				ABCA7	GPR160
		KCNAB2	C1RL.AS1				FAM129A	RRM2
		RAB44	NT5C				ARHGAP9	TMEM51.AS1
		TPPP3	MOCS1				APOBEC3A	CLEC1A
		PTENP1	MICALL2				TMCO3	TFAP2E
		RRP12	ZDHHC3				COL4A3BP	CCL8
		TMEM256-PLSCR3	COPG2IT1				TBCB	SAMD9L
		THBD	FAM149A				MID1IP1	EPS8L1
		NLRP1	KHNYN				PELI2	NCEH1
		FAM129C	GABRB2				FCGR2C	SGPP1
		RAB1B	LOC100289580				STX10	RABGAP1L
		LINC01127	COL9A2				PAK1	MIR6891
		STXBP2	LOC100128882				2025-03-01	SKA3
		MEG3	PRICKLE2				ST20-AS1	CD68
		SMCHD1	STK17A				S100P	CD96
		FAM200B	SFXN5				TSPOAP1	FAM213A
		IL27RA	LOC100288123				P2RY2	DOCK9
		SYNE1	DOLK				SLC37A3	GAS8
		SNX10	HSD17B6				C9orf72	ARL11
		RPL18	NOTUM				GLTP	CD28
		CARS2	CARD14				MBD2	OSBPL3
		TMEM164	SYCE2				AP1M1	DAGLA
		ETS1	FBXO27				STK40	NMNAT3
		GBP2	ASB1				LDLR	RWDD2B
		KEL	POMGNT1				MYADM	COLEC12
		PLSCR3	GNG7				PIM3	YBX1
		WARS	BEX5				EEF1D	TMEM255A
		HCAR3	ARHGEF10				FRAT1	SLAMF8
		ALOX15	SNORA67				CEP19	NCAPG
		ASGR1	ZFPM2				PTPN7	NCAPH
		CTSS	LRRC56				S100A11	RMND1
		CFL1	TANC1				H2AFY	TBC1D8.AS1
		RFTN1	WDR37				MKRN1	YWHAH
		TUBB1	ISM2				TJP2	ZNF774
		CHMP2A	ABCA3				DNTTIP1	DUSP3
		NBEAL2	SEMA6A.AS1				ARNTL	UBB
		FAAH	FAR2P2				MXI1	GBP1
		USP15	GAS2L2				SLC27A3	GYPC
		UBN1	ZNF204P				TMEM120A	TSPAN33
		VIM-AS1	BTBD19				MAK	MIR6503
		SERPINB8	MLLT1				USP32	DTX4
		NDST1	CORO6				GADD45A	SNHG28
		CAMK2G	TNS2				DENND5A	GLMP
		AGO2	TMEM74				PPBP	FZD5
		SRPK2	KBTBD8				FPR1	PIMREG
		ABCA7	TRAPPC9				CST7	UAP1L1
		FAM129A	ACTG1P20				ROPN1L	ADGRB1
		ARHGAP9	RGL3				ATP11B	MAP2
		APOBEC3A	NHSL1				LGALS2	KIF18A
		TMCO3	LOC102723385				KIAA0319L	LOC100128993
		COL4A3BP	BCL2L2				RILPL2	MROH7.TTC4
		TBCB	TSSK6				CA4	PXDC1
		MID1IP1	HNRNPA0				MKNK2	KPNA2
		FCGR2C	TMIGD3				FYN	B3GNT7
		STX10	ADGRL1				THOC5	BAHCC1
		PAK1	TRAF4				FERMT3	GAPT
		2025-03-01	SF1				KIAA0513	TSPAN15
		ST20-AS1	JAM2				LBH	MYOF
		S100P	MAPK9				ZFAS1	TNFRSF11A
		TSPOAP1	PHKA1				ARHGDIB	DIRC2
		P2RY2	BCAS1				ECE1	SH3PXD2A
		C9orf72	ADD1				FCAR	WIPF1
		GLTP	C12orf56				TAF10	ALMS1P1
		MBD2	KIAA1324L				CEMIP2	NAT8
		AP1M1	MED12L				SH3BP5-AS1	CLDN23
		STK40	PKD2				ALDH3B1	EXOC3L1
		MYADM	WHAMMP3				SLC12A9	ZNF726
		PIM3	KRTAP5.10				SPI1	CYBB
		EEF1D	CDH23				NOP53	AKAP12
		CEP19	IFNGR1				PRELID1	PIPOX
		BHLHE40	MEP1A				CD37	PLXNA1
		PTPN7	LOC155060				P2RY14	TGFB2.OT1
		S100A11	NRCAM				STAT6	ARHGAP5
		H2AFY	PCBP3				CHI3L1	MICU1
		MKRN1	PCDHB4				GPSM3	MTRNR2L6
		TJP2	MTA3				MAPKAPK3	ERGIC1
		DNTTIP1	ZNF783				SFI1	COL27A1
		ARNTL	RECK				APMAP	LTBP2
		MXI1	SORT1				PGLS	KLHL13
		TMEM120A	INTU				DGKZ	ZNF543
		MAK	LOC100128108				SLC2A4RG	HNMT
		USP32	AP3M2				ANXA3	SH3BP5.AS1
		LYZ	CEACAM21				HDGF	MIR4709
		GADD45A	HSPB8				MLKL	KIF20A
		DENND5A	PAQR6				GABARAPL1	WASHC2C
		PPBP	CTDSP2				TBC1D8	SLC17A5
		FPR1	IPO5P1				CTDSP1	CLEC4F
		HSH2D	ARRDC5				LSP1	NCAM1
		CST7	LHFPL1				RAB5IF	APOBEC3D
		ROPN1L	NCKAP5				HOPX	DTX1
		ST3GAL4	GATAD2B				LRWD1	ST7.OT3
		ATP11B	ADAMTS10				TSPOAP1-AS1	MS4A6A
		LGALS2	C20orf27				ELF4	EEF2K
		KIAA0319L	TGIF2				PTGS2	KCNN1
		RILPL2	NOL9				SIGIRR	TCF4
		CA4	AFAP1				IKZF3	MTM1
		MKNK2	PACS2				IGFBP7	SHB
		FYN	MLXIP				TRERF1	GBP1P1
		THOC5	PEX5				SPN	ATAD2
		FERMT3	RAPGEF2				SIK3	GBA
		KIAA0513	CCL22				HSPA7	SPATA7
		LBH	CX3CL1				CEBPB	CASP1
		ZFAS1	HIC2				WWC3	KAZN
		ARHGDIB	YKT6				SRGN	GDPD1
		ECE1	PLVAP				ARF6	CD33
		CRYBG1	NPR2				PIK3CB	NGRN
		FCAR	ADRB1				VMP1	PLA2G12A
		TAF10	PLAT				KDM4B	ETHE1
		CEMIP2	CHIC1				PRG2	SLC43A3
		FTH1	LYNX1				PINK1	ARSD
		SH3BP5-AS1	MDM2				OSCAR	LOC283194
		ALDH3B1	POLM				PILRA	SDC3
		SLC12A9	PURA				ALOX5	OLFML2A
		SPI1	ZNF391				SHROOM1	CCDC112
		GIMAP7	LINC01091				RXRA	THOC3
		NOP53	TGFBRAP1				TSPAN32	MICB.DT
		PRELID1	MMP19				SSBP3	BRD7
		NCF1C	KBTBD11.OT1				RHOG	LDAH
		CD37	HABP4				CALM3	MCUR1
		P2RY14	ZDBF2				HLA-B	LINC00977
		STAT6	SBF1				RAP1GAP2	GALNT6
		CHI3L1	ERCC1				ACTG1	HLA.A
		GPSM3	CACTIN.AS1				KLF2	RNF135
		MAPKAPK3	HECA				FOXP1	MELK
		SFI1	VAV2				ATP5MPL	DOCK7
		APMAP	RNF216				SIAH2	CRHBP
		PGLS	PRRT3.AS1				INPP4A	IL15
		DGKZ	SHC3				ANP32B	LINC00487
		SLC2A4RG	ARRDC2				NUDT16	PEX11A
		ANXA3	LOC100131604				ELOB	CXCR4
		HDGF	SSPO				NOTCH2	IFNAR2
		MLKL	TRPM4				CAT	FAM225A
		SNN	USP22				AQP9	SLFN12L
		GABARAPL1	FBXO31				RPL28	SGO2
		TBC1D8	HNRNPDL				RPLP2	MICALCL
		CTDSP1	ZNF251				NHSL2	IFI44
		LSP1	SYDE1				ARF5	VSIG8
		RAB5IF	FGD2				LOC100507507	CD47
		HOPX	NCS1				TREML2	HESX1
		LRWD1	ADRB2				ACTB	HOXA1
		TSPOAP1-AS1	PHYHD1				IRF1	GDE1
		ELF4	ZSCAN23				GPBAR1	ARHGEF16
		PTGS2	IRF5				B3GNT8	CDCA8
		SIGIRR	LOC101928126				MIDN	C20orf194
		IKZF3	TRPC4AP				PTP4A3	CDC6
		IGFBP7	MTCH1				CEP85L	PDE6D
		TRERF1	TMEM259				PLPPR2	ATG4C
		SPN	QRICH1				MYO1F	ZNF436
		SIK3	PIGO				GP1BB	HSDL2
		HSPA7	RAD54L2				CD82	HIST1H4C
		FCN1	C11orf95				ACOX1	MSR1
		CEBPB	ABCB11				ASF1B	NPM2
		WWC3	ALDH16A1				CYTH1	TNS1
		SRGN	LOC101929719				LOC653653	DYRK4
		ARF6	LINC00484				LYPLA2	NFE2L3
		PIK3CB	FPGS				MAP3K3	PRKACB
		VMP1	PPP1R3G				NLRX1	LOC100287467
		CD101	PARM1				UBALD2	PALM2.AKAP2
		PRG2	AIRE				CLSTN3	MOK
		PINK1	LOC101928437				ST6GALNAC2	AKAP2
		OSCAR	PFN2				UIMC1	ABCA1
		PILRA	PLEKHG1				LATS2	ZBP1
		ALOX5	C1orf115				CD160	LRRC20
		RXRA	BICC1				RPS9	SOCS1
		TSPAN32	SEC14L1P1				PDZD8	HYLS1
		SSBP3	PRNCR1				C5AR2	AP3S2
		RHOG	CGN				CENPBD1P1	PPIC
		CALM3	EML4				CLIC1	TUBB
		HLA-B	BEND5				CYSTM1	TPST2
		ADGRE1	DHX30				GSEC	FAM84B
		ACTG1	TRIM72				MMP8	RPS10P7
		FOXP1	KCNMB2.AS1				UBE2B	SNX12
		ATP5MPL	GSN.AS1				PI3	ARHGAP21
		SIAH2	ABCG2				B9D2	GOLIM4
		INPP4A	RPPH1				TES	MYZAP
		ANP32B	MIR6787				FCGR3B	SLC38A7
		ELOB	CPSF1				MMP17	CTSH
		NOTCH2	NUMBL				TFR2	PDP1
		CAT	POLN				WAS	DDX60
		AQP9	LOC100507373				HIPK3	FBXO39
		RPL28	IMPG1				PRKCH	RELL1
		RPLP2	LINC01160				ACSS2	CARD8.AS1
		NHSL2	LYL1				TREML3P	ICMT
		ARF5	CACTIN				CDK11B	CES3
		LOC100507507	ATOH8				FMNL1	SRGAP3
		TREML2	MIR6502				IL17RA	ATP6V1A
		CLEC10A	SUCNR1				FAM8A1	PEG3
		ACTB	PLEKHG4				STK10	KCTD10
		IRF1	STK35				RINL	MTSS1L
		GPBAR1	FSTL4				SLC46A2	BRSK1
		B3GNT8	PRKD3				ZBTB7B	CTD.2201I18.1
		MIDN	LOC101928000				CFLAR-AS1	IFNGR2
		PTP4A3	DUSP15				COP1	RNF150
		CAST	NFIX				PRKACA	GYPE
		CEP85L	LYPD1				AOC2	SLC37A2
		MYO1F	SLC41A3				PLEKHM1P1	SH3BP4
		GP1BB	UQCC1				NSFL1C	FCGR2A
		CD82	OXGR1				PSME1	OBSCN
		ACOX1	MECP2				DECR1	DNAJB9
		ASF1B	PRDM11				CASP4	PTGER4
		KLRF1	ENTPD4				FKBP1A-SDCBP2	IFIT1
		CYTH1	ANKLE2				SGMS2	TSKU
		CLEC4A	PRPF8				SH2D2A	MAPK12
		LOC653653	SLC38A10				CLEC12A	ARHGAP15
		LYPLA2	C4orf19				2025-09-05	ITGA9.AS1
		MAP3K3	CLUHP3				MED25	BRCA2
		NLRX1	PRRC2B				GALK1	AP2S1
		UBALD2	POLG				INPP5K	PTTG1
		ST6GALNAC2	PPP3CB				ING1	UNC13B
		UIMC1	VWA1				PADI2	LOC100507642
		LATS2	DOK1				EIF1	CENPBD1
		CD160	ADI1				TPD52L2	VAT1
		RPS9	NUDT3				RALBP1	SVIL.AS1
		PDZD8	NAT8L				CCND2	PAM
		C5AR2	RCOR2				TOM1	CHID1
		CENPBD1P1	MAGED2				GSK3A	ISG20
		LILRA2	REXO1				FBXW7	CENPK
		CLIC1	TGFBR2				AKNA	LBX2
		CYSTM1	IDI1				HLA-C	PLXDC1
		GSEC	MNT				SNHG7	LINC00506
		MMP8	TP53I13				HP	RAP1GDS1
		UBE2B	WDFY2				BIN3	LINC01006
		PI3	LINC01010				CASC3	WASHC1
		B9D2	ZMAT3				ZNF746	JADE1
		TES	HGSNAT				TMEM170B	HLA.DRA
		FCGR3B	LOC105375218				TMEM131L	CLTA
		MMP17	FAM168B				RHOF	ITGB8
		TFR2	DIP2A.IT1				SRXN1	MAX
		WAS	SLC18A1				ARHGEF18	BTN2A2
		HIPK3	ACTN2				ZFP36	EDEM2
		PRKCH	NOTCH4				CD247	CD74
		BRI3	EPM2A				HIP1	CBX1
		ACSS2	BRAT1				CLEC11A	NME6
		TREML3P	EML3				OSBPL5	RARRES3
		CDK11B	PIP4K2B				C15orf39	RNASE6
		FMNL1	CELF1				EXT1	CD81.AS1
		IL17RA	SPG7				SLC19A1	SFRP4
		FAM8A1	LOC101927497				CBFA2T3	SMN2
		STK10	PRRT3				WWP2	AKAP6
		SLC46A2	SIPA1				RELT	EIF5A2
		ZBTB7B	PIGL				PVR	CLSPN
		CFLAR-AS1	LAMP1				HLX	SMN1
		COP1	GTF3C2				RNPEPL1	OCIAD2
		PRKACA	DTX2				HPCAL1	LOC100419583
		AOC2	RPA4				TCIRG1	IFI27
		PLEKHM1P1	ATP6V1G2.DDX39B				PHOSPHO1	TCN2
		NSFL1C	PTPRG				C11orf21	PTGFRN
		S100A10	DDX39B				AATK	HIST1H1D
		PSME1	LOC101929798				CYP27A1	CBR1
		DECR1	ARGLU1				RTN3	PARS2
		CASP4	LOC100129534				GMEB2	PLEKHA7
		FKBP1A-SDCBP2	GLI4				HK1	ZFYVE16
		SGMS2	FGD1				PAPSS1	MMP24.AS1.EDEM2
		SH2D2A	ASXL1				PGS1	RAB9A
		CLEC12A	MORN1				LYRM1	MRPL17
		2025-09-05	RNF138P1				ACPP	FAM124B
		MED25	PNKP				CEBPB-AS1	RSU1
		GALK1	MEIS3P1				CNTNAP3	FAM174B
		INPP5K	MAN1A1				STEAP4	OAS2
		ING1	ADNP2				LOC729683	MTRNR2L10
		PADI2	TEX9				ANKRD13A	FRG1DP
		EIF1	ZNF608				VCAN-AS1	TMEM229B
		FNBP1	CTGF				SIGLEC14	RAVER2
		TPD52L2	CCDC84				MIR3945HG	HMMR
		RALBP1	RFX3				PF4	CTNS
		TOM1	GAK				PTP4A2	PCGF2
		GSK3A	SRSF11				ARHGAP26	PRC1
		FBXW7	FUS				IL32	ETV7
		AKNA	PTK2				PGLYRP1	P2RY6
		HLA-C	TMEM108				LAMTOR5	PRSS21
		SNHG7	DLEC1				ITGAL	AIM2
		HP	EXTL3				TNFRSF1B	ALCAM
		BIN3	RILPL1				PIK3CD	XAF1
		CASC3	PURG				MYL9	CARD6
		ZNF746	MC1R				MSL1	INIP
		TMEM170B	C16orf58				SRD5A1	AMOTL2
		TMEM131L	RIN2				OGA	FN1
		RHOF	LOC101928120				ITGB2	LGALS17A
		SRXN1	OXR1				ATG16L2	ZNF311
		ARHGEF18	SLC36A4				ITGA2B	TRIM5
		ZFP36	RABEP2				METRNL	BNIP3
		CD247	ARHGEF9				TET2	SMIM15
		HIP1	NLRP3				HCST	STBD1
		CLEC11A	LOC100129046				DDIT4	ZNF730
		OSBPL5	EIF4A3				NFE2	SNRPG
		C15orf39	ORMDL1				CD7	MPP6
		EXT1	NIPAL1				NKG7	SCTR
		SLC19A1	LOC103344931				FKBP1A	TEX2
		CBFA2T3	ATP7B				AES	HES4
		WWP2	RNF103				TMEM88	BTN3A1
		RELT	POFUT2				TBC1D10B	TMEM159
		PVR	SLC29A2				RELB	CMAHP
		HLX	BAP1				TGIF2-RAB5IF	PTMA
		RNPEPL1	LINC00893				EGLN1	UBE2L3
		HPCAL1	CHCHD7				TRAF3IP3	LOC101927699
		TCIRG1	LRRK1				ANAPC15	HLA.DQB2
		PHOSPHO1	LINGO3				TSC22D4	MYEOV
		C11orf21	RBM33				CD300H	L3MBTL4.AS1
		AATK	DKFZP586I1420				GUK1	NAT8B
		CYP27A1	DCAF6				FAM98C	HEXB
		RTN3	NAA20				MME	NDUFV2
		HK1	SIRT1				CYP1B1	TCF12
		PAPSS1	UBE2O				CPD	PLEKHF2
		PGS1	CDK13				HBEGF	LPIN1
		LYRM1	LINC00649				RNH1	NTAN1
		ACPP	REPS1				CNIH4	UBE2L6
		CEBPB-AS1	FNBP4				OSBPL2	NUDT16P1
		CNTNAP3	BAHD1				NCLN	SLC9A7
		CD48	TOX				CPNE1	MORN4
		STEAP4	WWC2				FAU	AKR1A1
		ANKRD13A	PDRG1				LOC729737	CPQ
		VCAN-AS1	ARMCX4				ULK1	RAB3IP
		SIGLEC14	SNORD153				BIN2	NECTIN1
		MIR3945HG	TUBGCP6				OSM	TMEM251
		PF4	C16orf72				PBX2	IGSF6
		PTP4A2	DENND5B				NAPRT	KLF12
		ARHGAP26	MYOZ1				VDR	NUB1
		SLAMF6	LOC100268168				OSBPL8	HLA.C
		IL32	IL6R				TTC7A	DEPDC1
		PGLYRP1	PINLYP				TSPAN16	TXNRD3
		LAMTOR5	VAPB				MFSD10	IBSP
		ITGAL	SOX9				PRICKLE3	LINC01504
		TNFRSF1B	PHF13				FOXO4	HLA.DOA
		PIK3CD	GNL1				PRKD2	DCAF12
		SRD5A1	MYO15B				DYSF	LINC02067
		LILRA1	CDH10				ACAA1	HASPIN
		ITGB2	SFSWAP				C21orf91	ZNF613
		ATG16L2	TFPI				GP9	VWF
		ITGA2B	DLL1				CD22	ZNF683
		METRNL	EPS8L3				PNPLA2	KLF11
		TET2	PLXNA3				APRT	TRMT5
		HCST	SNORD84				RRAS	RPS10
		MCU	NDUFAF7				NCF1B	RFK
		DDIT4	TRAF5				FAM110A	IL7
		NFE2	RPS6KA1				IL1R2	THRB
		PLXNC1	TCEA2				PADI4	AKR1C2
		CD7	EXD3				IFI30	PDLIM5
		NKG7	LOC100506548				PYCARD	KIAA1522
		FKBP1A	SLC28A1				ITPK1	NEK2
		AES	SERPINF1				C17orf49	CTSL
		TMEM88	DNAJC18				RPL8	ATIC
		TBC1D10B	MALINC1				FCRL1	PTGR1
		RELB	C1QTNF3				ZC3H3	RBL1
		TGIF2-RAB5IF	FOXK1				PPM1F	MGAT4A
		EGLN1	ANKMY1				PCNX1	AMIGO2
		TRAF3IP3	RUNX1				TNFAIP6	HJURP
		ANAPC15	LRRC14				PRAF2	HLA.DMB
		TSC22D4	ANKRD44				PPP1R15A	HLA.DQA2
		CD300H	LINC01736				TNFSF14	AHCYL2
		GUK1	RBM28				LRFN1	SEC23B
		FAM98C	RHOB				MYB	PRTFDC1
		MME	FKRP				KIF1B	SDC4
		CYP1B1	ULK3				CAPN1	SHLD2
		CPD	PIP5K1A				SLA	PDGFRL
		HBEGF	RUNX1.IT1				PTPN1	MLLT3
		RNH1	CEP63				HMGCR	FNDC10
		CNIH4	CTRL				PDPK1	SLC1A4
		OSBPL2	BIN1				GYG1	KLRC2
		NCLN	MAN2C1				VPS51	GRN
		CPNE1	SENP6				OGDH	ATP6V1D
		FAU	NMT2				SLC45A4	KIF11
		LOC729737	SBF1P1				RPS8	APEX2
		ULK1	SNHG20				HIST2H2BE	IER3
		BIN2	LINC01001				GRAMD1A	CDKN3
		PBX2	SUV39H1				CCPG1	ZNF101
		NAPRT	SMIM10L2A				KLHL21	KNL1
		VDR	EDN1				MKL1	KYNU
		OSBPL8	PCDHB10				MTF1	LOC101927417
		TTC7A	SIGLEC11				NAA38	IDH1
		TSPAN16	BCL9L				DUSP1	RPE
		MFSD10	PRKACG				LOC104968399	SLC12A8
		PRICKLE3	CIRBP				HDAC7	ZNF483
		FOXO4	LMLN				SLC16A5	HAPLN3
		PRKD2	FAM53B				PER1	TOP2A
		DYSF	PLAGL2				TRADD	STAT1
		ACAA1	FSBP				PTEN	PRDM6
		C21orf91	LYVE1				CEBPE	DPRXP4
		CD22	JAKMIP3				CEACAM8	MIR4253
		MBP	TMEM225B				RNF126	CDK20
		APRT	FGFRL1				STK16	SLC6A12
		RRAS	CASTOR2				VCAN	IRF9
		NCF1B	DPH1				NCOA1	GMPR
		FAM110A	RBM25				PSMD9	SEC22B
		IL1R2	TLE4				GOLM1	EZH2
		PADI4	SNORD10				ARHGAP25	TSHZ1
		IFI30	FASTK				ZDHHC7	PAX8.AS1
		PYCARD	SCAF8				MATK	UTF1
		ITPK1	C17orf107				NAAA	ITGA1
		C17orf49	ADAM22				SAMD3	LYRM4.AS1
		RPL8	TM9SF4				SPINT1	UCP2
		TNFAIP2	OBSL1				PPCDC	LGMN
		FCRL1	SNED1				SMPD3	C2orf81
		ZC3H3	AP5Z1				ELOVL5	FLNB.AS1
		LITAF	CSNK1D				SSNA1	KIAA1614
		PPM1F	MIR3138				RPS14	CCRL2
		PCNX1	CDKN2B.AS1				LAMTOR4	ROBO1
		TNFAIP6	ZXDC				FAM214B	ADARB1
		ANXA2P2	PLCG1				PPP1R9B	FGFR1OP
		PRAF2	TMEM52B				COX4I1	CALCR
		PPP1R15A	TAF6				BBC3	TTC7B
		TNFSF14	LDLRAD4.AS1				YPEL3
		LRFN1	AMIGO1				ZFPM1
		MYB	ASAH2B				LOC105370489
		KIF1B	APBB1IP				IPMK
		CAPN1	TAF11				POLR2J
		SLA	STMN3				LOC728392
		PTPN1	AKAP8				GATAD2A
		IQGAP1	RASL11B				CR1
		HMGCR	LOC401478				NR1H2
		PDPK1	BTBD9				TRAPPC5
		GYG1	CYP8B1				NFKBIZ
		OGDH	RNU5A.1				IL1RN
		SLC45A4	PCDHB5				PLEC
		RPS8	AGAP12P				TRIR
		HIST2H2BE	FSTL5				COQ8B
		FXYD6	HSPA12A				STIM1
		GRAMD1A	CCNL2				CASP8
		CCPG1	MIR4800				CELF2-AS1
		KLHL21	TMEM131				LPCAT1
		MKL1	ZNF556				RPS3
		MTF1	JMJD4				MROH6
		NAA38	ISYNA1				SIRPB2
		DUSP1	BTK				FUZ
		LOC104968399	IGIP				RPS6
		HDAC7	KCNT1				DUS2
		SLC16A5	ATP2A1				MPIG6B
		TRADD	LOC101927549				SPTBN1
		PTEN					CDC34
		CEBPE					PRKCB
		CEACAM8					RACK1
		RNF126					FLII
		STK16					PHC2
		VCAN					PEAK3
		NCOA1					RNF169
		PSMD9					PLIN4
		GOLM1					AGPAT2
		ARHGAP25					SNX21
		ZDHHC7					MMP24OS
		NAAA					VAMP2
		SAMD3					KLF10
		SPINT1					OXER1
		PPCDC					CSK
		SMPD3					PTPRC
		ELOVL5					PLIN5
		SSNA1					ARSG
		HTATSF1P2					DAPP1
		RPS14					NR4A1
		LAMTOR4					PGGHG
		LGALS1					TSTD1
		PPP1R9B					S1PR3
		COX4I1					KSR1
		BBC3					LINC00877
		YPEL3					DLGAP4
		ZFPM1					IL4R
		LOC105370489					DHX34
		IPMK					NDE1
		POLR2J					CSNK1G2
		LOC728392					HLX-AS1
		GATAD2A					DNAAF4-CCPG1
		CR1					PSD4
		NR1H2					MYC
		TRAPPC5					FCMR
		NFKBIZ					RPL35A
		IL1RN					ADAMTSL4-AS1
		PLEC					QSOX1
		TRIR					CLEC1B
		STIM1					AURKAIP1
		CASP8					MTX1
		CELF2-AS1					RPL13
		LPCAT1					STARD10
		VAV3					MPP7
		RPS3					ANK1
		MROH6					RNASE3
		SIRPB2					UBL5
		FUZ					S100A12
		RPS6					ABCA2
		DUS2					ITGB2-AS1
		MPIG6B					GATA2
		SPTBN1					CBX6
		CDC34					LINC01506
		PRKCB					CD1C
		RACK1					ZC3H12A
		FLII					IFRD1
		PEAK3					POR
		CD44					FBL
		RNF169					HBA2
		PLIN4					PYHIN1
		AGPAT2					DOK3
		SNX21					SLC9A8
		MMP24OS					ITGAX
		KLF10					H1FX
		CSK					NLRC5
		PTPRC					MAPK7
		PLIN5					TMSB10
		DAPP1					WDTC1
		PGGHG					EML2
		TSTD1					LTB4R2
		S1PR3					CTDP1
		KSR1					C4BPA
		LINC00877					EVI2B
		DLGAP4					ZNF395
		IL4R					ZDHHC20
		DHX34					MAP3K11
		BLVRA					PTGER2
		NDE1					ENO1
		HLX-AS1					ALYREF
		DNAAF4-CCPG1					POLE4
		PSD4					PRR13
		MYC					HBG2
		FCMR					KATNB1
		RPL35A					GK
		ADAMTSL4-AS1					VPS37B
		QSOX1					EIF3L
		CLEC1B					CALCOCO2
		AURKAIP1					ARRDC1
		MTX1					EHBP1L1
		RPL13					ST20
		STARD10					RPL3
		MPP7					JOSD2
		ANK1					LOC105747689
		RNASE3					PCBP2-OT1
		NCF4					CISH
		UBL5					PTPRCAP
		S100A12					PCTP
		ABCA2					SRF
		ITGB2-AS1					B3GNTL1
		GATA2					ABHD4
		LINC01506					ESRRA
		CD1C					MAZ
		ZC3H12A					C1orf74
		IFRD1					KLF1
		POR					MHENCR
		HBA2					PRAM1
		PYHIN1					GP1BA
		DOK3					ARPC5
		ITGAX					ARHGAP45
		H1FX					KLF7
		NLRC5					STRN4
		ALDH1A1					CXCR1
		MAPK7					POU5F1P3
		TMSB10					AZU1
		WDTC1					IL1RL1
		EML2					SMCO4
		LTB4R2					TAPBP
		CTDP1					ANKRD13D
		C4BPA					ALKBH4
		EVI2B					AXIN1
		ZNF395					EIF3F
		ZDHHC20					CCM2
		MAP3K11					MYL12A
		PTGER2					VCPKMT
		CD300LF					BLOC1S1
		DMXL2					PIM1
		ENO1					PLEKHG2
		ALYREF					CUX1
		POLE4					KCNH2
		PRR13					LPAR2
		HBG2					YPEL5
		KATNB1					GATA1
		IQGAP2					MAP7D1
		GK					SYTL3
		EIF3L					TAGLN
		CALCOCO2					PPP4R1L
		EHBP1L1					LOC105375304
		ST20					MARK2
		RPL3					IL18RAP
		JOSD2					POU2F2
		LOC105747689					TNIP2
		PCBP2-OT1					SLC9A1
		CISH					SIRT7
		PTPRCAP					TTLL4
		PCTP					PBXIP1
		SRF					KLRC4-KLRK1
		B3GNTL1					LCN2
		ABHD4					GRK2
		ESRRA					HBG1
		MAZ					ZNF394
		C1orf74					CLTB
		KLF1					PITPNM1
		MHENCR					ATG4D
		PRAM1					JDP2
		GP1BA					RBMS1
		ARPC5					SLC35A1
		ARHGAP45					ZNF467
		KLF7					NFKBIB
		BLVRB					PSMB8
		STRN4					RIN3
		CXCR1					RHAG
		POU5F1P3					GAPDH
		AZU1					BPI
		CCL5					LSM6
		IL1RL1					MGAT4B
		CMTM1					LINC00537
		SMCO4					GZMA
		TAPBP					LTF
		ANKRD13D					CDA
		ALKBH4					SIGLEC5
		AXIN1					PTGDS
		EIF3F					SAP30
		CCM2					ATG2A
		MYL12A					TESC
		VCPKMT					FAS
		BLOC1S1					RPLP1
		PIM1					ERP27
		PLEKHG2					AREG
		CUX1					CBX4
		KCNH2					PKN1
		LPAR2					POLR2L
		YPEL5					TMEM91
		GATA1					PSMB3
		MAP7D1					LAT
		SYTL3					IFITM1
		TAGLN					TPCN2
		PPP4R1L					GNLY
		LOC105375304					ERICH1
		IL18RAP					NFKBIA
		POU2F2					MSRA
		TNIP2					RPL26
		DPYD					ALDOC
		SLC9A1					IL18R1
		SIRT7					CD79B
		TTLL4					PID1
		PBXIP1					MOB2
		KLRC4-KLRK1					PYCARD-AS1
		LCN2					FOXO1
		GRK2					EPB42
		HBG1					RPL6
		ZNF394					RPL10
		CLTB					HSD17B10
		PITPNM1					CHCHD5
		ATG4D					TBC1D10A
		JDP2					PRDX2
		KLRK1					MIR497HG
		RBMS1					GMIP
		ANXA2					HBA1
		SLC35A1					SNAPC2
		ZNF467					UBR5-AS1
		NFKBIB					CAVIN2
		PSMB8					ITGB1BP1
		RIN3					NOTCH1
		RHAG					ZNF213
		GAPDH					EGLN2
		BPI					SNX15
		LSM6					MZT2B
		MGAT4B					RNF144B
		GZMA					CEACAM19
		CD3E					SLC4A1
		PLAC8					NUP50-DT
		LTF					HBB
		CDA					NCR1
		SIGLEC5					MARK4
		PTGDS					TYK2
		ATG2A					AS-PTPRE
		FAS					SCO2
		RPLP1					NRM
		ERP27					ALOX12
		AREG					YWHAZ
		CBX4					PRKAG2
		PKN1					IER2
		POLR2L					TYMP
		TMEM91					TRIQK
		PSMB3					FBXO6
		LAT					FXYD5
		IFITM1					RPS5
		TPCN2					RAB4B-EGLN2
		GNLY					TECPR1
		ERICH1					LIME1
		NFKBIA					LINC01410
		MSRA					RAVER1
		RPL26					ACAP3
		ALDOC					MS4A3
		IL18R1					RAB40C
		CD79B					FBRS
		PID1					UBE2J1
		MOB2					LOC100288203
		PYCARD-AS1					CIDEB
		EPB42					VAMP1
		MS4A1					RPL5
		RPL6					AKT2
		RPL10					GYPA
		HSD17B10					TLE3
		CHCHD5					DYNLT1
		TBC1D10A					CA1
		AP3S1					GPR27
		PRDX2					TBX21
		MIR497HG					H3F3A
		GMIP					CHPT1
		HBA1					HLA-F
		SNAPC2					OSBP2
		UBR5-AS1					CHD3
		CAVIN2					MIIP
		ITGB1BP1					SSH3
		NOTCH1					TMCC2
		ZNF213					KLRB1
		EGLN2					PRR29
		SNX15					TRIM24
		MZT2B					ITPKB
		RNF144B					AHSP
		SECTM1					LINC00528
		CEACAM19					ARHGEF1
		SLC4A1					SLC26A6
		SPTA1					KLF4
		NUP50-DT					LOC102724323
		HBB					RGS3
		NCR1					OTUD5
		MARK4					MCTP2
		TYK2					GALNS
		AS-PTPRE					GCH1
		SCO2					CSRNP1
		NRM					CREBBP
		ALOX12					BRE-AS1
		YWHAZ					CASP5
		IER2					PSMB8-AS1
		TYMP					CDK6
		TRIQK					LINC00641
		FBXO6					ABHD17A
		FXYD5					CYTOR
		RPS5					KLRD1
		RAB4B-EGLN2					WDR13
		TECPR1					LOC100507551
		LIME1					GSE1
		RAVER1					RPS18
		ACAP3					TRABD
		ARRDC4					CSAD
		MS4A3					ATP5F1D
		FBRS					ZNF385A
		UBE2J1					ABCB10
		LOC100288203					ZNF316
		CIDEB					ANP32A-IT1
		VAMP1					ITGB7
		RPL5					RASSF1-AS1
		GYPA					SIDT2
		TLE3					RPL14
		DYNLT1					PLBD1-AS1
		CA1					CATIP-AS1
		GPR27					RPL7A
		TBX21					ZBTB7A
		H3F3A					RNA45SN3
		CHPT1					RNA28SN3
		ABRACL					LOC339192
		HLA-F					DBI
		OSBP2					RPS15
		CHD3					COL18A1
		MIIP					HGS
		SSH3					RPL29
		TNFAIP8					EIF5A
		TMCC2					SH2D1B
		KLRB1					CNOT3
		PRR29					RNF44
		TRIM24					C3orf62
		NME8					DPYD-AS1
		AHSP					RPL27
		LINC00528					ECHDC3
		ARHGEF1					NACA
		SLC26A6					AGER
		KLF4					OGFR
		LOC102724323					ALAS2
		RGS3					ITPKC
		OTUD5					RPL9
		MCTP2					LOC100652768
		GALNS					SLC2A1
		GCH1					RPS12
		CREBBP					MZT2A
		BRE-AS1					IL10RB-DT
		CASP5					CA5BP1
		PSMB8-AS1					SELENBP1
		ABHD17A					RPL4
		CYTOR					NQO2
		KLRD1					KRI1
		WDR13					MAPK8IP3
		LOC100507551					VAMP5
		GSE1					PET100
		RPS18					H3F3AP4
		TRABD					FLVCR2
		CSAD					EBLN2
		ATP5F1D					MYL4
		ZNF385A					CIC
		ABCB10					HBM
		ZNF316					CD151
		GPR141					IL5RA
		ANP32A-IT1					MCEMP1
		MCUB					GPR162
		GBP5					RPL31
		ITGB7					PRSS57
		RASSF1-AS1					HIST1H2AC
		SIDT2					AGAP2-AS1
		RPL14					RPL10A
		PLBD1-AS1					FKBP11
		CATIP-AS1					PACS1
		RPL7A					KANSL1-AS1
		ZBTB7A					HEMGN
		RNA45SN3					CITED4
		RNA28SN3					FCHO1
		LOC339192					LCK
		DBI					HDC
		RPS15					FHL3
		COL18A1					PHYKPL
		HGS					FBRSL1
		RPL29					LOC100506844
		EIF5A					RPSAP58
		SH2D1B					VEGFA
		CNOT3					RPS13
		RNF44					ORM1
		C3orf62					UNKL
		DPYD-AS1					ZNF185
		RPL27					PWWP2B
		ECHDC3					ARID3A
		NACA					CEACAM1
		AGER					HELZ2
		OGFR					TUBA1A
		ALAS2					MBD6
		RPL9					TAP1
		LOC100652768					FAM229A
		SLC2A1					RNF175
		RPS12					IDI2-AS1
		MZT2A					RPL13A
		IL10RB-DT					NPEPL1
		NRBF2					VPS9D1
		CA5BP1					LINC01220
		C5orf56					RPL27A
		RPL4					UQCRHL
		NQO2					ZASP
		KRI1					PRTN3
		MAPK8IP3					JUP
		VAMP5					LOC100130283
		PET100					MED16
		H3F3AP4					RPS15A
		FLVCR2					HIST2H2AC
		EBLN2					CCDC88B
		MYL4					LRCH4
		CIC					P2RX1
		HBM					LOC284454
		CD151					PGAM2
		GNG11					RPLP0
		IL5RA					LINC02432
		MCEMP1					GABPB1-AS1
		GPR162					SGSH
		RPL31					SERPINB2
		PRSS57					SORD
		HIST1H2AC					ZNF414
		AGAP2-AS1					SIRPB1
		RPL10A					RPS7
		FKBP11					LINC00921
		PACS1					INAFM1
		KANSL1-AS1					ELANE
		HEMGN					RPL13AP5
		FCHO1					LOC221946
		LCK					RNA28SN5
		HDC					SNHG9
		FHL3					NAA80
		PHYKPL					SAP25
		FBRSL1					RPL34
		LOC100506844					RPL18A
		RPSAP58					RPL24
		VEGFA					MUSTN1
		RPS13					THBS3
		ORM1					GDPD3
		UNKL					CAMP
		ZNF185					MEF2B
		PWWP2B					TMEM86B
		ARID3A					LINC00926
		CEACAM1					CTSG
		HELZ2					RNASE2
		TUBA1A					RNA28SN1
		MBD6					VPS9D1-AS1
		TAP1					EGR1
		FAM229A					RPL17
		RNF175					CPA3
		IL2RB					RNA45SN1
		IDI2-AS1					RNA45SN5
		RPL13A					RNA28SN2
		NPEPL1					HMBS
		VPS9D1					DEFA4
		LINC01220					NEAT1
		LGALS3					RPS3A
		PSMB9					MPO
		RPL27A					RPS2
		UQCRHL					TMA7
		PRTN3					RNA45SN2
		JUP					TMEM176A
		HOTAIRM1					TBKBP1
		LOC100130283					TREML4
		CXCL1					RPL23P8
		MED16					EEF1A1
		RPS15A					KCNN4
		HIST2H2AC					FCGR2B
		CCDC88B					TMEM176B
		P2RX1
		LOC284454
		RPLP0
		LINC02432
		GABPB1-AS1
		SGSH
		SERPINB2
		SORD
		ZNF414
		SIRPB1
		RPS7
		LINC00921
		INAFM1
		ELANE
		F13A1
		RPL13AP5
		LOC221946
		RNA28SN5
		SNHG9
		NAA80
		SAP25
		CHCHD2
		RPL34
		RPL18A
		RPL24
		MUSTN1
		THBS3
		GDPD3
		CAMP
		MEF2B
		LINC00926
		CTSG
		RNASE2
		RNA28SN1
		VPS9D1-AS1
		RPL17
		CPA3
		RNA45SN1
		RNA45SN5
		RNA28SN2
		HMBS
		DEFA4
		RPS3A
		MPO
		TNNI2
		RPS2
		TMA7
		RNA45SN2
		UBE2C
		TMEM176A
		TBKBP1
		TREML4
		RPL23P8
		EEF1A1
		KCNN4
		FCGR2B
		TMEM176B
		LOC606724
