# Supplementary material for: Global human myeloid replacement with peripheral progenitors induces interferonopathy and neurodegeneration
Source: Research Square preprint supplement (doi:10.21203/rs.3.rs-7762822/v1), 2025-10-03
Supplement: Supplementary file 3 [file fe4c72923968b658ec06eddd.xlsx]

## Sheet: Sheet1
Supplementary Table 3. Key resources used for immunofluorescence, cell culture, library preparation, and bioinformatic analysis.
Reagent or Resource	Dilution and Source	Identifier
Antibodies	F = Flow cytometry; IF = Immunofluorescence; WB = Western blot
Anti-human CD11b PE (Clone ICRF44)	F 1:100, BioLegend	301306; RRID: AB_314158
Anti-human CD45 ACP-Cy7 (Clone HI30)	F 1:100, BioLegend	304014; RRID: AB_314402
Anti-human CD64 APC (Clone 10.1)	F 1:100, BioLegend	305014; RRID: AB_1595428
Anti-human CX3CR1 PerCP-Cy5.5 (Clone 2A9-1)	F 1:100, BioLegend	341614; RRID: AB_11219203
Anti-human CD14-AF 488(Clone M5E2)	F 1:100, BioLegend	301811; RRID: AB_493159
Anti-human HLADR PE-Cy7 (Clone L243)	F 1:100, BioLegend	307616; RRID: AB_493588
FITC anti-human CD11b (Clone ICRF44)	F 1:100, BioLegend	301330; RRID: AB_2561703
Goat anti-IBA1	IF 1:200, Abcam	ab5076; RRID: AB_2224402
Anti-Ku80 antibody (Clone EPR3468)	IF 1:200, Abcam	Ab80592; RRID: AB_1603758
Rabbit Anti-P2RY12	IF 1:200, Millipore Sigma	HPA014518; RRID: AB_2669027
HLD-DR Monoclonal antibody (Clone LN3)	IF 1:200, ThermoFisher	14-9956-82; RRID: AB_468639
PU.1 antibody	IF 1:200, Cell Signaling Technology	2266S; RRID: 10692379
Human MxA/Mx1 antibody	IF 1:200, R&D systems	AF7946; RRID: AB_3644531
Anti-TMEM119 antibody produced in rabbit	IF 1:200, Millipore Sigma	HPA051870; RRID: AB_2681645
Purified anti-human CX3CR1 antibody (Clone 2A9-1)	IF 1:200, BioLegend	341602; RRID: AB_1595422
Perilipin-2 Polyclonal antibody	IF 1:200, Proteintech	15294-1-AP; RRID: AB_2878122
Anti-Nuclei Antibody (Clone 235-1)	IF 1:200, Millipore Sigma	MAB1281; RRID: AB_94090
Purified anti-human CD9 antibody (Clone HI9a)	IF 1:200, BioLegend	312102; RRID: AB_314907
Anti-MEF2C antibody (Clone EPR19089-202)	IF 1:200, Abcam	ab211493; RRID: AB_2864417
Phospho-Stat1 (Tyr701) (58D6) Rabbit mAb	IF 1:200, Cell Signaling Technology	9167S; RRID: AB_561284
Monoclonal mouse anti-human CD68 (Concentrate)	IF 1:200, Agilent	M081401-2; RRID: AB_2750584
Anti-Glial Fibrillary Acidic Protein Antibody	IF 1:500, Millipore Sigma	AB5541; RRID: AB_177521
Anti-SOX9 antibody (Clone EPR14335-78)	IF 1:200, Abcam	ab185966; RRID: AB_2728660
Anti-Myelin Basic Protein Antibody	IF 1:500, Millipore Sigma	AB9348; RRID: AB_2140366
anti-Gad67 antibody	IF 1:200, ThermoFisher	PA5-21397; RRID: AB_11153284
Anti-VGluT2 antibody	IF 1:200, WB 1:1000, Millipore Sigma	AB2251-I; RRID: AB_2665454
Anti-Homer1 antibody [EPR15309]	IF 1:200, Abcam	ab184955; RRID: AB_2744679
Anti-Ctip2 antibody (Clone 25B6)	IF 1:200, Abcam	ab18465; RRID: AB_2064130
Anti-Osteopontin antibody	IF 1:200, Abcam	ab63856; RRID:AB_1524127
Anti-PICALM antibody (Clone EPR12177)	IF 1:200, Abcam	ab172962,
Donkey anti-Goat IgG Cy3	IF 1:1000, Jackson ImmunoResearch	705-165-147; RRID: AB_2307351
Donkey anti-Goat IgG AF488	IF 1:1000, Jackson ImmunoResearch	705-545-147; RRID: AB_2336933
Donkey anti-Goat IgG AF647	IF 1:1000, Jackson ImmunoResearch	705-605-147; RRID: AB_2340437
Donkey anti-Rabbit IgG Cy3	IF 1:1000, Jackson ImmunoResearch	711-165-152; RRID: AB_2307443
Donkey anti-Rabbit IgG AF488	IF 1:1000, Jackson ImmunoResearch	711-545-152; RRID: AB_2313584
Donkey anti-Rabbit IgG AF647	IF 1:1000, Jackson ImmunoResearch	711-605-152; RRID: AB_2492288
Donkey anti-mouse IgG AF647	IF 1:1000, Jackson ImmunoResearch	715-605-151; RRID: AB_2340863
Donkey anti-chicken AF488	IF 1:1000, Jackson ImmunoResearch	703-545-155; RRID: AB_2340375
Donkey anti-chicken Cy3	IF 1:1000, Jackson ImmunoResearch	703-165-155; RRID: AB_2340363
Donkey anti-rat AF647	IF 1:1000, Jackson ImmunoResearch	712-605-153; RRID: AB_2340694
IRDye® 800CW Goat Anti-Rabbit IgG	WB 1:10000,LI-COR	926-32211
IRDye® 680RD Goat Anti-Mouse IgG	WB 1:10000,LI-COR	926-68070
Reagents
TRIzol LS Reagent	Thermo Fisher Scientific	10296028
Oligo d(T)25 Magnetic beads	NEB	S1419S
1M Tris-HCl, PH 7.5	hermo Fisher Scientific	15567027
1M LiCl	MilliporeSigma	L7026
1M MgCl2	Thermo Fisher Scientific	AM9530G
0.5M EDTA, PH 8.0	Thermo Fisher Scientific	15575020
Lithium dodecyl sulfate	MilliporeSigma	L9781
Triton X-100	MilliporeSigma	T8787
5M NaCl	Thermo Fisher Scientific	2978153
10% SDS	Thermo Fisher Scientific	24730020
1M Magnesium acetate	Thermo Fisher Scientific	J60041.AE
DTT	Thermo Fisher Scientific	P2325
SuperScript III Reverse Transcriptase	Thermo Fisher Scientific	18080044
5X First-strand Buffer	Thermo Fisher Scientific	18080044
Random Primers	Thermo Fisher Scientific	48190011
Oligo dT	Thermo Fisher Scientific	18418020
SUPERase-In	Ambion	AM2696
dNTP (10mM)	Thermo Fisher Scientific	18427088
Actinomycin D	Sigma	A1410
Tween20	Thermo Fisher Scientific	J20605.AP
Agencourt RNA Clean XP Beads	Beckman Coulter	A63987
NEBuffer 2	Biolabs	B7002S
RNase H	Enzymatics	Y9220L
DNA polymerase I	Enzymatics	P7050L
SpeedBeads magnetic carboxylate modified particles	GE Healthcare	65152105050250
T4 DNA pol	Enzymatics	P7080L
Klenow	Enzymatics	P7060L
T4 PNK	Enzymatics	Y9040L
Klenow 3’-5’ Exo	Enzymatics	P7010-LC-L
T4 DNA ligase HC	Enzymatics	L6030-HC-L
NEBNext 2X High Fidelity PCR MM	Biolabs	M0541
KAPA SYBR FAST qPCR Master mix (2x)	Kapa Biosystems	7959427001
2X Rapid ligation buffer	Enzymatics	B1010L
10X T4 DNA ligase buffer	Enzymatics	B6030L
NEXTflex DNA Barcodes	BIOO SCIENTIFIC	NOVA-514104
Uracil DNA Glycosylase (UDG)	Enzymatics	G5010L
10% TBE gel, 12 well	Thermo Fisher Scientific	EC627522BOX
O’range 50bp DNA ladder	Thermo Fisher Scientific	SM0613
Qubit dsDNA HS 500 Assay kit	Thermo Fisher Scientific	Q32854
Formaldehyde 37% by weight	Thermo Fisher Scientific	F79-1
Glycine	MilliporeSigma	4810
Bovine serum albumin	MilliporeSigma	A3059
4’,6’-Diamidino-2-phenylindole dilactate (DAPI)	Biolegend	422801
UltraPure DNase/RNase-free distilled water	Thermo Fisher Scientific	10977023
Sucrose	Thermo Fisher Scientific	S6500
DMEM/F12(1:1)	Thermo Fisher Scientific	11330-032
GlutMAX (100X)	Thermo Fisher Scientific	35050-061
MEM NEAA (100X)	Thermo Fisher Scientific	11140-050
Penicillin-Streptomycin	Thermo Fisher Scientific	15140-122
B-27 Supplement (50X)	Thermo Fisher Scientific	17504-044
N-2 Supplement (100X)	Thermo Fisher Scientific	17502-048
Insulin-Transferrin-Selenium (100X)	Thermo Fisher Scientific	41400-045
2-mercaptoethanol (50mM)	Thermo Fisher Scientific	31350010
Human insulin solution	Sigma-Aldrich	I9278
rhM-CSF	Proteintech	HZ-1192
rhIL-34	Proteintech	HZ-1316
TGF
STEMdiff Hematopoietic Kit	STEMCELL Technologies	5310
ReLeSR	STEMCELL Technologies	5872
Gentle cell Dissociation Reagent	STEMCELL Technologies	100-0485
CryoStor CS10	STEMCELL Technologies	100-1061
Bambanker Serum Free Cell Freezing medium	Thermo Fisher Scientific	NC9582225
RNAscope 3-plex Positive Control probe-HS	Advanced Cell Diagnostics	320861
RNAscope 3-plex Negative Control probe-HS	Advanced Cell Diagnostics	320871
TSA Vivid Fluorophore 520 FITC	Advanced Cell Diagnostics	323271
TSA Vivid Fluorophore 520 Cy3	Advanced Cell Diagnostics	323272
TSA Vivid Fluorophore 520 Cy5	Advanced Cell Diagnostics	323273
RNAscope Probe-HS-APOE	Advanced Cell Diagnostics	433091
RNAscope Probe-HS-MS4A7	Advanced Cell Diagnostics	514321
Commercial assays
Tagment DNA Enzyme and buffer Small kit	Illumina	20034197
ChIP DNA Clean and Concentrator Kit	Zymo Research	D5205
Chromium Next GEM Single Cell 3’ Kit v3.1, 4rxns	10X Genomics	1000269
Chromium Next GEM Single Cell 3’ Kit v3.1, 16rxns	10X Genomics	1000268
Chromium Next GEM Chip G Single Cell Kit, 16 rxns	10X Genomics	1000127
Single Index Kit T Set A	10X Genomics	1000213
RNAscope Multiplex Fluorescent Kit v2	Advanced Cell Diagnostics	323100
Experimental models
EC11	N/A	Firth et al. PMID 26299960
Mouse: Csf1r∆FIRE/∆FIRE	David A. Hume & Clare Pridans	Rojo et al. PMID: 31324781;
		RRID: IMSR_JAX: 032783
Software
HOMER	N/A	http://homer.ucsd.edu/homer/
Cell Ranger	N/A	https://github.com/10XGenomics/
		cellranger
Metascape	N/A	http://metascape.org/gp/index.html#/
		main/step1
R package: Seurat	N/A	https://satijalab.org/seurat/
R package: Pheatmap	N/A	https://CRAN.R-project.org/
		package=pheatmap
R package: DEseq2	N/A	https://bioconductor.org/packages/
		release/bioc/html/DESeq2.html
R package: GEOquery	N/A	https://www.bioconductor.org/packages/release/bioc/html/GEOquery.html
R package: ggplot2	N/A	https://cran.r-project.org/web/packages/ggplot2/index.html
R package: dplyr	N/A	https://cran.r-project.org/web/packages/dplyr/index.html
R package: limma	N/A	https://bioconductor.org/packages/release/bioc/html/limma.html
R package: Pheatmap	N/A	https://cran.r-project.org/web/packages/pheatmap/index.html
R package: readr	N/A	https://cran.r-project.org/web/packages/readr/index.html
R package: harmony	N/A	https://cran.r-project.org/web/packages/harmony/index.html
R package: GEOquery	N/A	https://www.bioconductor.org/packages/release/bioc/html/GEOquery.html
R package: VennDiagram	N/A	https://cran.r-project.org/web/packages/VennDiagram/index.html
R package: DEGreport	N/A	https://www.bioconductor.org/packages/release/bioc/html/DEGreport.html
R package: Complex heatmap	N/A	https://www.bioconductor.org/packages/devel/bioc/html/ComplexHeatmap.html
R package: Clustree	N/A	https://cran.r-project.org/web/packages/clustree/index.html
R package: scSorter	N/A	https://cran.r-project.org/web/packages/scSorter/vignettes/scSorter.html
